# Supplementary material for: Sequential Modulation of the cGAS-STING Pathway Promotes Spinal Cord Injury Repair
Source: Research Square preprint supplement (doi:10.21203/rs.3.rs-8596952/v1), 2026-01-22
Supplement: Supplementary file 1 [file 2c70a07100b533419cd278cf.xlsx]

## Sheet: GO(BP)
Supplementary Table 1. Top five enriched biological processes for the four temporal gene expression patterns identified in the time-course transcriptome analysis of SCI
C1 (initial decrease then increase)
id	Pathway	Category	ListHits	ListTotal	p-value	q-value	Enrichment_score	geneID
GO:0006811	monoatomic ion transport	biological_process	159	2224	1.34e-28	5.66e-26	2.49033	Scn4a;Lcn2;Mlc1;Kcng4;Slc24a4;Kcns1;Cldn10;Slc22a3;Grin2c;Kcnj11;Calhm6;Steap4;Slc10a4;Fxyd1;Slc5a7;Kcnc3;Kcnip2;Fxyd2;Kcnk9;Cacng2;Kcnk1;Scn4b;Ttyh1;Lhfpl5;Atp1b2;Gabra5;Chrna3;Slc22a2;Scn9a;Atp2b2;Panx2;Gabrb1;Kcnb2;Scn1a;Grin1;P2rx6;Kcnt1;Gria1;Slc30a3;Slc4a4;Kcnc1;Chrna4;Atp7b;Kcnj13;Kcnip4;Gabrg1;Slc12a5;Asic2;Kcnj5;Gabrg2;Grik1;Slc4a5;Ryr2;Glra1;Kcnc4;Lrrc38;Gabra1;Slc22a8;Atp1b1;Slc30a10;T…
GO:0007268	chemical synaptic transmission	biological_process	65	2224	3.2e-23	1.18e-20	3.84174	Grin2c;Gjd2;Gabra5;Chat;Gabrb1;Grin1;Pcdh8;Gria1;Sncb;Htr2c;Chrm2;Chrm1;Slc18a3;Gabrg1;Slc12a5;Gabrg2;Cntnap2;Hrh3;Glra1;Gabra1;Htr5a;Sncg;Syp;Gabrq;Grm1;Sv2b;Glra3;Grm7;Fgf12;Nrxn3;Fgf14;Kcnma1;Gabrb3;Cacnb1;Cacna1b;Gabra3;Chrnb2;Slc17a7;Grin2b;Npr2;Apba1;Clstn1;Nlgn1;Cartpt;Grm5;Htr7;Snap91;Sv2a;Penk;Nrxn1;Gria2;Glrb;Unc13a;Grik5;Nlgn3;Cacnb2;Grin3a;Cacna1g;Nrxn2;Cacnb4;Hrh1;Myo6;Unc13c;Cacna1e…
GO:0007155	cell adhesion	biological_process	140	2224	3.89e-20	1.07e-17	2.21489	Cdhr5;Pcdha1;Cdh9;Cldn10;Frem3;Col6a5;Hapln1;Lsamp;Omd;Ttyh1;Atp1b2;Ntm;Vtn;Cdhr3;Pcdh8;Epha8;Egfl6;Pcdha5;Siglecf;Cntnap2;Cntnap4;Mmp24;Podxl2;Cntnap5a;Atp1b1;Ccn5;Ache;Clstn3;Hepacam;Fbln7;Ctnnd2;Col8a2;Cntnap1;Cntn1;Pcdhac1;Cd4;Spon1;Pcdha12;Cldn19;Arvcf;Pcdha3;Astn1;Mfap4;Lama2;Lamb3;Siglech;Ninj2;Nrxn3;Celsr2;Cdh1;Pcdhb6;Lamc3;Folr1;Adam23;Dpt;Kirrel3;Ret;Lamb2;Bcan;Pcdhga2;Cadm3;Vcam1;Hapln…
GO:0007399	nervous system development	biological_process	106	2224	9.57e-18	2.03e-15	2.37175	Otp;Gfra3;Slc1a2;Insm1;Chrna3;Ndrg2;Trnp1;Nrg3;Epha8;Ina;Nrn1;D130043K22Rik;Lhx1;Nrsn2;Rbfox3;Grik1;Adgrb1;Drgx;Brinp2;Rassf10;Ntng1;Actl6b;Ntrk2;Pcsk2;Chd5;Mamdc2;Gpm6a;Shank1;Acvr1c;Myt1l;Fgf13;Camk2b;Dcdc2a;Slitrk1;Brinp1;Ndnf;Nrsn1;Apc2;Ttll7;Robo2;Chodl;Ret;Sarm1;Dll3;Dcx;Gabrb3;Brsk1;Plppr1;Cspg5;Brsk2;Amigo1;Cntf;Camk2g;Bicdl1;Dact1;Fzd3;Pou3f2;Dpf3;Epha5;Zic2;L1cam;Magi2;Bex1;Dab1;Sema3b;…
GO:0007411	axon guidance	biological_process	53	2224	3.45e-12	4.13e-10	2.75175	Edn3;Gfra3;Mypn;Lgi1;Epha8;Epha6;Drgx;Cdk5r2;Cxcl12;Cntn1;Unc5d;Prtg;Lama2;Pax6;Unc5a;Robo2;Lamb2;Nog;Tgfb2;Epha5;L1cam;Cdh4;Rtn4rl1;Tenm2;Sema3b;Cdk5r1;Reln;Sema6c;Sema3c;Tubb3;Efna3;Gas1;Sema3a;Sema5b;Sema4d;Epha10;Scn1b;Dscam;Matn2;Ephb6;Slit1;Sema4f;Dscaml1;Efnb3;Robo1;Boc;Nfasc;Mapk8ip3;Cntn2;Epha3;Efna5;Lrtm2;Csf1r
C2 (continuous decline)
id	Pathway	Category	ListHits	ListTotal	p-value	q-value	Enrichment_score	geneID
GO:0051965	positive regulation of synapse assembly	biological_process	50	3629	9.27e-21	2.05e-18	3.78892	Slitrk2;Prkca;Ube2v2;Nlgn2;Ntrk3;Xlr3b;Lrrn1;Bdnf;Adgrl3;Ephb1;Efna5;Grid2;Adgrb2;Amigo2;Nlgn3;Ptprd;Lrrtm2;Lrrtm3;Lrrc4b;Lingo2;Slitrk5;Ntrk2;Cux2;Adgrl1;Lrtm2;Lrrtm4;Wnt7a;Stau2;Clstn1;Nlgn1;Oxtr;Il1rapl1;Flrt1;Dlg4;Nrxn1;Adgrb3;Amigo1;Slitrk3;Clstn2;Asic2;Syndig1;Adgrb1;Slitrk4;Cbln1;Cbln2;Slitrk1;Lrrc24;Clstn3;Lrrtm1;Lingo4
GO:0042391	regulation of membrane potential	biological_process	61	3629	1.28e-20	2.64e-18	3.31423	Kcnk2;Kif5b;Cacna1a;Grik2;Grik3;Cnih2;Pex5l;Grik5;Slc4a8;Kcnj10;Tafa4;Hcn2;Actn2;Cacna1g;Chrna5;Chrna6;Cacnb4;Kcna1;Slc4a4;Hcn1;Asic1;Hcn3;Grik1;Kcnh1;Kcnh5;Slc1a6;Glrb;Glra4;Popdc3;Gabrb1;Kcnma1;Rims3;Rims2;Chrnb2;Asic2;Gabrb3;Kcnh2;Chrna7;Chrna3;Gabrb2;Htr3b;Dpp6;Htr3a;Grin2a;Rims4;Hcn4;Chrna4;Kcnq2;Chrna2;Gabrq;Glra2;Rims1;Glra3;Cacna1i;Kcnj11;Grin2c;Grin1;Ntsr2;Cacng2;Scn1a;Glra1
GO:0007626	locomotory behavior	biological_process	65	3629	5.87e-20	1.1e-17	3.11955	Ddhd2;Pcdh15;Reln;Aplp2;Aph1b;Adra1b;Meis1;Npy1r;Olfm2;Gng7;Npas3;Slc18a2;Shank3;Adcy5;Fign;Myo6;Sobp;Sod2;Gnao1;Abca2;Prkn;Nrg1;Wdr47;Astn1;Pak5;Apba2;Pak6;Gpr88;Gprc5b;Penk;Apba1;Slc1a1;Dlg4;Pde1b;Dscam;Cntn1;Myo15a;Cdh23;Cacna1b;Adcy8;Gpr52;Lmx1b;Chrnb2;Negr1;Cacna1e;Ppp1r1b;Klhl1;Chrna3;Scn8a;Rasd2;Grm5;Abat;Grin2a;Elavl4;Calb1;Drd2;Chrna4;Cntnap2;Lrrtm1;Grm1;Snap25;Atp2b2;Htr2c;Oprk1;Oprm1
GO:0014059	regulation of dopamine secretion	biological_process	25	3629	1.05e-15	1.3e-13	4.9648	Syt4;Syt13;Htr2a;Syt12;Syt6;Htr1b;Prkcb;Syt11;Syt17;Syt9;Snca;Sncg;Syt5;Chrna6;Chrnb2;Syt10;Syt1;Syt7;Kcna2;Rab3a;Drd2;Chrna4;Grm2;Syt3;Syt2
GO:0007409	axonogenesis	biological_process	57	3629	1.51e-14	1.61e-12	2.75859	Slitrk2;Kalrn;Aplp2;Sema4d;Gsk3b;Syngap1;Fgfr2;Stmn1;Ulk1;Pax6;Cdk5;Cnp;Ptprz1;Myh10;Zdhhc17;Ctnna2;Cntn2;Trim46;Aplp1;Ark2c;Ank3;Slitrk5;Rtn4r;Ndn;Mapt;Uchl1;Bcl11b;Map1b;Map1a;Cckar;Isl1;Pak3;Plppr4;Dab1;Atl1;Slit1;Amigo1;Slitrk3;Map2;Adcy1;Ntng1;Brsk2;Drgx;Brsk1;Snap91;Slitrk4;Cck;Nrn1;Pou4f2;Slitrk1;Rab3a;Drd2;Cntnap1;Cntnap2;Nefl;Sptbn4;Atp8a2
C3 (continuous increase)
id	Pathway	Category	ListHits	ListTotal	p-value	q-value	Enrichment_score	geneID
GO:0045087	innate immune response	biological_process	216	3480	9.68e-47	3.2e-43	2.63132	Ang2;Fgb;Arg1;Clec4n;Clec4d;Lgals3;Wfdc17;Mcoln2;Marco;Ly9;Tlr8;Trem1;Cd84;Cd244a;Slamf7;Clec7a;Clec4e;Mpeg1;Mefv;Cfp;Tlr13;Ifi204;Slc15a3;Cd180;Syk;Zbp1;Cyba;Tlr7;Acod1;Tmem106a;Klrk1;Havcr2;Anxa1;Trim30b;Clec5a;Cfi;Cybb;Cd14;Fcer1g;Nr1h4;Btk;Fcgr1;Nrros;Pycard;Mmp3;Ticam2;Fgr;Neurl3;Ptx3;Naip2;Trem2;C1qc;Oasl1;Tlr2;Il1rl2;Arg2;Tlr4;Naip5;Tnfaip8l2;Sp110;Tlr6;Tarm1;Nlrp1b;Oas3;Lyn;C1qb;Bst2;Casp…
GO:0006954	inflammatory response	biological_process	178	3480	1.01e-44	1.37e-41	2.85835	Il1f10;Pla2g2e;Cd5l;Adam8;Il1rn;Olr1;Tlr8;Ccl7;C3ar1;Ccl6;Fosl1;Ccl2;Lilrb4a;Thbs1;Mefv;C5ar1;Ccr1;Kng1;Tlr13;Bdkrb1;Slc11a1;Ccl3;Ptafr;Selp;Cd180;Ccl8;Cyba;Stab1;Tlr7;Ccl4;Acod1;Pf4;Havcr2;Anxa1;Ecm1;Cybb;Cd14;Il17b;C5ar2;Nr1h4;Il1b;Tnfrsf1b;Nrros;Pycard;Ticam2;Chil3;Il6;Cnr2;Cxcl1;Ccl11;Naip2;Ccl9;Tlr2;Cd44;Il1rl2;Fpr1;Tlr4;Naip5;Cmklr1;Tnf;Ccr2;Tgfb1;Lipa;Tlr6;Ccl21a;Ncf1;Nlrp1b;Lyn;Casp4;Fosl…
GO:0006955	immune response	biological_process	127	3480	1.47e-31	9.98e-29	2.82493	Raet1e;Il1f10;Cd209d;Cxcr1;Raet1d;H2-M2;Il1rn;Ccl7;Ccl6;Tnfsf11;Ccl2;Clec4e;Ulbp1;Ccr1;Tlr13;Ccl3;Osm;Ccl8;Ccl4;Serpinb9b;Cd28;Pf4;Ikbke;H2-Eb1;H60b;Ctsl;Il1b;Tnfrsf1b;Nrros;Cxcr4;Il6;Cxcl1;Ccl11;Cd4;4930486L24Rik;Cst7;Ccl9;Tlr2;Tnfsf13;Ackr4;Tlr4;Tnfsf14;Vav1;Tnf;Cd86;Ccr2;Ctss;Tlr6;Ccl21a;H2-Q7;Tnfsf15;Ccr7;Cd209a;Cxcr6;Cxcl2;Il1a;Tnfsf8;Irf8;Ccl24;Ctsh;Tlr1;Was;Cxcr2;Cd80;Plscr1;Lif;Cxcl3;Ccl1…
GO:0043065	positive regulation of apoptotic process	biological_process	138	3480	2.82e-21	7.96e-19	2.20424	Bcl2a1c;Ubd;Ankrd1;Top2a;Bcl2a1b;Melk;Fosl1;Aldh1a3;Zbp1;Klrk1;Ccn1;Anxa1;Sfrp4;Il1b;Bcl2a1d;Pycard;B4galt1;Ctsd;Tbx20;Ptgs2;Il6;Ccn2;Lgals1;Cdkn2a;Casp8;Ect2;Tlr4;Tnf;Gata6;Cyp1b1;Tgfb1;Tgm2;Tnfrsf10b;Sp110;Irf8;Tspo;Irf5;Ripk1;Inpp5d;Plscr1;Nos2;Steap3;Bcl2a1a;Igfbp3;Nox4;Itgb1;Casp6;Tnfaip8;Nlrc4;Stk17b;Bcl2l11;Sav1;Bak1;Casp1;Tnfrsf8;Dusp6;Mmp2;Ldha;Mcl1;Sox4;Uaca;Plekhn1;C6;Ano6;Irf1;Cdk4;Ca…
GO:0050729	positive regulation of inflammatory response	biological_process	50	3480	8.23e-19	1.69e-16	3.57485	Adam8;Serpine1;Fabp4;Mefv;Ccl3;Osm;Zbp1;Il1b;Pycard;Lgals1;Sucnr1;Tlr2;Tlr4;Ccn4;Cebpb;Ccr2;Tgfb1;Ctss;Tlr6;Nlrp1b;Casp4;Lpl;Nlrp10;Ccl24;Nlrp3;Ripk1;Cebpa;Gsdmd;Gpsm3;Trpv4;Aim2;Tnfrsf1a;Ninj1;Lilra5;Nfkbiz;Casp1;Ets1;Hyal2;Il17ra;Ifi35;Adora3;Nlrp1a;Il16;Nfkbia;Stat5a;Abcc1;Il33;Nmi;Mdk;Tradd
C4 (initial increase then decrease)
id	Pathway	Category	ListHits	ListTotal	p-value	q-value	Enrichment_score	geneID
GO:0007049	cell cycle	biological_process	143	917	2.51e-62	1.05e-58	5.14072	Hmga2;Prc1;Birc5;Cep55;Kif23;Ube2c;Ccnb1;Bub1;Bub1b;Cdc25c;Ccna2;Dlgap5;Plk1;Clspn;Cdkn3;Cdca2;Ska3;E2f7;Ccnb2;Nsl1;Kif2c;Sgo1;Ska1;Aurka;Kntc1;Mki67;Ercc6l;Cenpe;Tpx2;Spc25;Ect2;Melk;Oip5;Spdl1;Cdca8;Cdca5;Ccnf;Nek2;Nuf2;Kif11;Pimreg;Knl1;Hells;Cdca3;Ndc80;Ddias;Zwilch;Uhrf1;Knstrn;Chek1;Aurkb;Aspm;Cdk1;Nusap1;Cks2;Ncapg2;Cdc20;Ticrr;Dscc1;Kif18b;Fancd2;Brca1;Tacc3;Ncaph;Esco2;Ckap2;Mcm5;Gmnn;Cc…
GO:0051301	cell division	biological_process	97	917	1.8e-46	3.75e-43	5.72745	Hmga2;Prc1;Birc5;Cep55;Kif23;Ube2c;Ccnb1;Bub1;Bub1b;Cdc25c;Ccna2;Plk1;Cdca2;Ska3;Ccnb2;Nsl1;Kif2c;Sgo1;Ska1;Aurka;Kntc1;Ercc6l;Cenpe;Tpx2;Spc25;Ect2;Oip5;Spdl1;Cdca8;Cdca5;Ccnf;Nek2;Nuf2;Kif11;Pimreg;Knl1;Hells;Cdca3;Ndc80;Zwilch;Knstrn;Aurkb;Aspm;Cdk1;Nusap1;Cks2;Ncapg2;Cdc20;Kif18b;Tacc3;Ncaph;Ccne2;Sgo2a;Spc24;Cdc6;Cks1b;Mastl;Fbxo5;Racgap1;Pttg1;Bora;Mis18bp1;Ccne1;Mad2l1;Ccnd1;Incenp;Cenpw;S…
GO:0006974	DNA damage response	biological_process	73	917	1.33e-18	6.16e-16	3.18125	Exo1;Pclaf;Aunip;Eme1;Clspn;Cdkn3;Pif1;E2f7;Zranb3;Top2a;Mcm10;Ankle1;Dtl;Brip1;Neil3;Ddias;Polq;Uhrf1;Fanca;Rad54l;Gen1;Chek1;Ticrr;Fancd2;Brca1;Rad51ap1;Mms22l;Pole;Parpbp;Chaf1b;Foxm1;Hrob;Fbxo5;Pttg1;Bard1;Rad51;Ccnd1;Ube2t;Ddx11;Rad54b;Chaf1a;Mcm8;Topbp1;Rad51c;Fanci;Lig1;Pagr1a;Ung;Timeless;Cenps;Rad18;Fam111a;Atad5;Polh;Fen1;Vav3;Pcna;Pidd1;H2ax;Traip;Mcm7;Fancb;Cdk2;Cdk6;Fnip2;Wdr76;Ercc1…
GO:0001525	angiogenesis	biological_process	39	917	9.99e-11	1.6e-08	3.23228	Hmox1;Prok2;Esm1;Ereg;Apold1;Adam8;Thbs1;Serpine1;Shh;Flt4;Pecam1;Sox18;Ccl2;Ptgs2;Kdr;Itga5;Epha2;Tie1;Dll4;Ccn2;Angptl4;Nos3;Rasip1;Egfl7;Mmrn2;Vegfa;Tek;Vav3;Pxdn;Cald1;Robo4;Itgav;Ecscr;Cav1;Cemip2;Hif1a;Nus1;Ecm1;Casp8
GO:0030593	neutrophil chemotaxis	biological_process	19	917	2.89e-10	3.76e-08	5.85193	Pf4;Trem1;Cxcl3;Spp1;Il17b;Ppbp;Ccl7;C5ar1;Ccl2;Ccl9;Ccl24;Trem3;Ccl6;S100a8;Ccl11;Vav3;Lgals3;Cxcr2;Itgam
