# Supplementary material for: Sequential Modulation of the cGAS-STING Pathway Promotes Spinal Cord Injury Repair
Source: Research Square preprint supplement (doi:10.21203/rs.3.rs-8596952/v1), 2026-01-22
Supplement: Supplementary file 2 [file 69857a9cc24508bde94e1c2d.xlsx]

## Sheet: GO(BP)
Supplementary Table 3. Top ten enriched Gene Ontology terms for genes up- or down-regulated at 3 and 14 days post-SCI versus sham controls
DEGs upregulated at both 3 and 14 day post-SCI compared to sham
id	Term	Category	ListHits	p-value	Enrichment_score	geneID
GO:0002376	immune system process	biological_process	241	8.49745e-88	3.92785	Spon2;Tnfsf13;Cd3e;Irf1;Alpk1;Rnf135;Ifih1;Klrk1;Apobec3;Prkd2;Gsdmd;Oas3;Malt1;Ticam2;C2;Nlrp1a;H2-K1;Oas2;Inppl1;Nlrc4;Pirb;Irag2;Clec4e;Tlr7;Il4ra;Kcnn4;Dhx58;Cd74;C1qc;Marco;Tlr13;Irf8;Il1rl2;Sertad3;Tnfrsf14;Fcgr4;Eif2ak2;Clec5a;Slc15a3;Ticam1;H2-Q7;Arid5a;Cd300a;Tnfrsf13b;Ripk2;Hp;Tlr1;Cd247;Ssc5d;Mavs;Ifit1;Cd300c2;Samhd1;Ly86;Prdm1;Naip6;Trim14;Cd8b1;Fgr;Acod1;Anxa1;Oasl2;Cgas;Tlr4;Lag3;Z…
GO:0045087	innate immune response	biological_process	191	6.48343e-57	3.39077	Spon2;Irf1;Alpk1;Rnf135;Ifih1;Klrk1;Apobec3;Gsdmd;Oas3;Malt1;Ticam2;C2;Trim21;Nlrp1a;Oas2;Nlrc4;Clec4e;Tlr7;Trim12c;Dhx58;C1qc;Marco;Fosl2;Tlr13;Il1rl2;Sertad3;Tnfrsf14;Eif2ak2;Clec5a;Slc15a3;Ticam1;Arid5a;Ripk2;Tlr1;Ssc5d;Mavs;Ifit1;Samhd1;Ly86;Prdm1;Naip6;Trim14;Ptx3;Nrros;Fgr;Acod1;Anxa1;Oasl2;Cgas;Tlr4;Trex1;Cd180;Mpeg1;Trim34a;Cfb;Mcoln2;Nlrp1b;Naip2;Isg20;Slamf6;Mefv;Tlr6;Arg2;Nod2;Msrb1;Sy…
GO:0006954	inflammatory response	biological_process	148	1.73082e-45	3.4634	Pparg;Cxcl10;Cxcr6;Selp;Gsdmd;Afap1l2;Ticam2;Nlrp1a;Nlrc4;Ccr5;Tlr7;Tgfb1;S1pr3;Fosl2;Ncf1;Tlr13;Il1rl2;Tnfrsf1b;Mapkapk2;Ticam1;Alox5;Ccl12;Tlr1;C5ar1;Naglu;Ptafr;Ccl7;Il1rn;Ccl4;Ly86;Naip6;Nrros;Ndst1;Acod1;Anxa1;Slc11a1;Tlr4;Zc3h12a;Cd96;Cd5l;Fut4;Trex1;Ccr7;Cd180;Nlrp1b;Naip2;Ccr2;Mefv;Cxcr3;Tlr6;Nfkbid;Nod2;Il17ra;Havcr2;Hck;Ccl11;Lacc1;Nfkb1;Naip5;Lipa;Cmklr1;Ccrl2;Sphk1;Hdac7;Nlrp10;Ccl5;S…
GO:0006955	immune response	biological_process	106	1.77628e-32	3.43601	Cxcl10;Cd28;Cxcr6;Tnfsf13;Cst7;Enpp1;H2-K1;H2-Q6;Ccr5;Clec4e;Cd74;Plscr1;Pnp;Tlr13;Ackr4;Irf8;Tnfrsf1b;H2-Q7;Cd209d;Ccl12;Tlr1;Ccl7;Il1rn;Ccl4;Ly86;Nrros;Map3k14;Tlr4;Osm;Serpinb9;Trex1;Ccr7;Ulbp1;Ccr2;Cxcr3;Tlr6;Prg4;Mr1;Ccl11;Ctsh;Cd80;Lst1;P2ry14;Cxcr1;Ccrl2;B2m;H2-DMb1;Ccl5;Ctsl;Ccl6;Ccl21a;Ccr9;Cxcr2;Myd88;Was;Lat;Tnfsf15;H2-M2;Fas;Cd274;H2-Ab1;Cx3cr1;Tnfsf12;Colec12;Il1b;H2-T23;Ccr1;Fcgrt;H…
GO:0032760	positive regulation of tumor necrosis factor production	biological_process	72	5.44937e-32	4.56631	Hspb1;Spon2;Ifih1;Oas3;Lpl;H2-K1;Oas2;H2-Q6;Ptprc;Ccr5;Tgfb1;Mapkapk2;Ticam1;H2-Q7;Arid5a;Ripk2;Plcg2;Fcgr3;Tlr1;Nfatc4;Ptafr;Mavs;Ifngr1;Ccl4;Ccn1;Tlr4;Ccr7;Ccr2;Nod2;Syk;Havcr2;Spn;Cd36;Twist1;Btk;Card9;Fadd;Myd88;Thbs1;H2-M2;Oas1g;Rigi;Tyrobp;Cyba;Ly96;H2-T23;Cd2;Pycard;Fzd5;Csf1r;Clec7a;H2-Q1;Tlr9;Tnfrsf1a;H2-Q4;Oas1a;Sash3;Cd14;Ccl3;Cybb;Lilra5;Cd84;Lbp;Tlr2;Ccl2;Lgals9;Il1a;H2-D1;Ripk1;Fcer…
GO:0071222	cellular response to lipopolysaccharide	biological_process	78	8.16796e-27	3.71013	Cxcl10;Spon2;Cd68;Klrk1;Irak2;Nr1h3;Malt1;Ticam2;Gch1;Plscr1;Casp7;Irf8;Tnfrsf1b;Fcgr4;Ticam1;Arid5a;Ripk2;Acod1;Mrc1;Tlr4;Zc3h12a;Cd180;Vim;Plscr3;Irak3;Nod2;Sbno2;Gbp6;Havcr2;Cd36;Nfkb1;Cd80;Irgm2;B2m;Stat1;Nos2;Sirpa;Tnip2;Cebpb;Litaf;Myd88;Irak4;Cd274;Cx3cr1;Tnip3;Nfkbiz;Zfp36;Il1b;Ly96;Serpine1;Pycard;Rara;Gbp3;Tnfaip3;Nlrp3;Stap1;Cd86;Cxcl1;Cxcl16;Cxcl5;Cd14;Cdk4;Axl;Lilrb4a;Cfh;Cxcl2;Map2k…
GO:0032755	positive regulation of interleukin-6 production	biological_process	58	8.29547e-26	4.53233	Spon2;Ifih1;Ticam2;Lpl;Ccr5;Tlr7;Tgfb1;Cd74;Il1rl2;Ticam1;Laptm5;Arid5a;Ripk2;Plcg2;Tlr1;Ptafr;Mavs;Aif1;Ccn1;Tlr4;Tlr6;Nod2;Syk;Il17ra;Cd36;Twist1;Rab7b;Btk;Nlrp10;Tlr8;Card9;Il16;Il6ra;Nos2;Vegfd;Il17rc;Myd88;Rigi;Tyrobp;Trpv4;Il1b;Cyba;Pycard;Scimp;Unc93b1;Clec7a;P2rx7;Tlr9;Inava;Pou2f2;Lilra5;Lbp;Tlr2;Lgals9;Il1a;Fcer1g;Tmem106a;Tnf
GO:0051607	defense response to virus	biological_process	82	2.22502e-25	3.43384	Cxcl10;Spon2;Irf1;Ifih1;Apobec3;Oas3;Ticam2;Nlrp1a;Oas2;Ptprc;Tlr7;Cxadr;Dhx58;Plscr1;Ifnar2;Eif2ak2;Ticam1;Mavs;Ifit1;Ifngr1;Prf1;Samhd1;Rnasel;Rtp4;Acod1;Oasl2;Map3k14;Cgas;Itgax;Trex1;Trim34a;Ripk3;Nlrp1b;Isg20;Slfn8;Ddx60;Pml;Cd8a;Trim25;Zc3hav1;Mov10;Zbp1;Rsad2;Ifitm2;Parp9;Apobec1;Tlr8;Card9;Stat1;Oasl1;Irf7;Fadd;Dtx3l;Myd88;Ifitm1;Sting1;Ifitm3;Slfn9;Cd40;Oas1g;Aim2;Mlkl;Il10rb;Rigi;Pycard…
GO:0002250	adaptive immune response	biological_process	77	2.74248e-24	3.47377	Cd3e;Klrk1;Prkd2;H2-K1;H2-Q6;Pirb;Cd74;Tnfrsf14;H2-Q7;Tnfrsf13b;Ripk2;Cd247;Prdm1;Cd8b1;Anxa1;Lag3;Trex1;Mcoln2;Slamf6;Arg2;Erap1;Gpr183;Nod2;Tnfrsf11a;Syk;Il17ra;Dclre1c;Havcr2;Cd8a;Btk;Adgre1;Slfn1;H2-DMb1;Nlrp10;Cd244a;Card9;Pdcd1;Ptk2b;Arg1;Slamf7;Lat;H2-M2;Lat2;Sla2;Cd274;H2-Ab1;Cx3cr1;Slfn2;Myo1g;Nfkbiz;Tap1;Clec4n;H2-T23;Clec4a2;Cd3g;Clec4d;H2-DMa;Sh2d1b1;H2-Eb1;Unc93b1;Trem1;Bcl10;Ly9;Cd4…
GO:0009617	response to bacterium	biological_process	72	6.56712e-24	3.60086	Cxcl10;Chd7;Alpk1;Gas2l3;Cav1;Lpl;C2;Oas2;Myo1f;Dhx58;Ncf1;Irf8;Fcgr2b;Serpina3n;Hp;Klhl6;Gpc3;Cep192;Ifit1;Acod1;Slc11a1;Tlr4;Glycam1;Cflar;Adamts9;Cfb;Ccdc80;Ifi205;Gbp6;Fabp4;Cd36;Rgs1;Nlrc5;Irgm2;Tent5a;Resf1;Ly6a;Stat1;Slc17a5;Nos2;Vegfd;Trim30a;Adh7;Pygl;Slfn2;Ifi204;Pycard;Cd52;AA467197;Stap1;Serpina3f;Slfn4;P2rx7;Herc6;Cd14;Sp110;Fcgr1;Usp18;Psmb9;Tlr2;Ccl2;Irgm1;Tgtp1;Iigp1;Cyp2b10;Saa3;…
DEGs specifically upregulated at 3 days post-SCI compared to sham
id	Term	Category	ListHits	p-value	Enrichment_score	geneID
GO:0030198	extracellular matrix organization	biological_process	23	5.30781e-09	4.24553	Col8a2;Ecm2;Abi3bp;Adamtsl1;Col23a1;Matn3;Matn4;Adamts20;Egflam;Col9a1;Col13a1;Smoc1;Adamts17;Mia;Adamts2;Tgfb2;Nphp3;Col9a3;Adamts16;Crispld2;Col22a1;Gfap;Vtn
GO:0060070	canonical Wnt signaling pathway	biological_process	15	5.64393e-07	4.75043	Wnt5a;Cdh1;Tcf7l1;Wnt4;Wnt5b;Wnt10a;Fzd8;Wnt11;Fgf2;Dvl2;Sostdc1;Fzd10;Eda;Wnt6;Dact1
GO:0006954	inflammatory response	biological_process	31	7.33695e-07	2.67752	Foxp3;Il18r1;Wnt5a;Rela;Agtr1a;Tlr11;Gper1;Ptger4;Ptgfr;Cxcl13;Crh;Il34;Vcam1;Relb;Pla2g2d;Msmp;Tbxa2r;Ptger1;Tlr12;Fut7;Rarres2;Wnk4;Bmp6;Xcl1;Ager;Il17re;Gbp5;Il1rl1;Ccl22;C3;Ggt5
GO:0001649	osteoblast differentiation	biological_process	14	1.91469e-06	4.61471	Igf2;Tgfbr3;Smo;Gli3;Msx2;Mef2c;Bmp4;Ucma;Wnt11;Fgf2;Tmem119;Bmp6;Smad3;Axin2
GO:0001658	branching involved in ureteric bud morphogenesis	biological_process	10	2.53199e-06	6.46059	Fat4;Lama5;Gli3;Wnt4;Bmp4;Cited2;Fgf2;Eya1;Adamts16;Wnt6
GO:0008285	negative regulation of cell population proliferation	biological_process	30	2.9976e-06	2.55023	Foxp3;Atf5;Abi3bp;Ddr1;Gper1;Cldn19;Ifit3b;Ifit3;Cxcl12;Gli3;Msx2;Bmp4;Dpt;Podn;Pmp22;Ccn5;Fgf2;Six5;Trp53inp1;Timp2;Tgfb2;Pth1r;Smad3;Bmp5;Ecrg4;Tns2;Zbtb7c;Il1rl1;Axin2;Smad6
GO:0007155	cell adhesion	biological_process	40	3.9304e-06	2.17528	Col8a2;Fat4;Lama5;Sdk1;Ncan;Pcdhga1;Cdh1;Pcdhgc3;Fbln7;Cldn19;Selplg;Sorbs3;Arvcf;Cdhr4;Cdhr5;Lamb3;Col13a1;Vcam1;Dpt;Emp2;Celsr1;Pmp22;Ccn5;Lamb2;Ctnnal1;Tcam1;Pcdhgc4;Gp1bb;Omd;Col6a6;Dpp4;Pcdhga5;Frem2;Pard3b;Lamc3;Cd6;Lamc2;Vtn;Boc;Pbxip1
GO:0001822	kidney development	biological_process	17	6.02016e-06	3.56591	Fat4;Lama5;Wnt5a;Agtr1a;Pcsk5;Gli3;Tet2;Ace;Bmp4;Cited2;Wnt11;Bmp6;Tgfb2;Nphp3;Frem2;Tns2;Glis2
GO:0003139	secondary heart field specification	biological_process	5	1.10776e-05	14.6832	Wnt5a;Mef2c;Bmp4;Wnt11;Axin2
GO:0010628	positive regulation of gene expression	biological_process	36	1.67284e-05	2.14163	Foxp3;Wnt5a;Tbx21;Rela;Smo;Lcn2;Gper1;Cldn19;Ptger4;Ptgfr;Myom1;Mef2c;Crh;Il34;Bmp4;Wnt10a;Pmp22;Cited2;Fgf2;Tmem119;Trp53inp1;Bmp6;Tgfb2;Plscr2;Slc22a2;Pou3f1;Maf;Ager;Cntf;Smad3;Angpt1;Musk;Eda;Wnt6;Fgfr4;Erbb3
DEGs specifically upregulated at 14 days post-SCI compared to sham
id	Term	Category	ListHits	p-value	Enrichment_score	geneID
GO:0002181	cytoplasmic translation	biological_process	37	5.02981e-25	8.2343	Rps25;Rpl29;Rps2;Rps10;Rps24;Rps8;Rplp1;Rpl31;Rps5;Rps3;Rpl15;Rpl7a;Rpl28;Rps7;Rpl4;Rpl22;Rps27a;Rpl7;Rps15a;Rpl23a;Rps14;Rpl39l;Rpl13;Rps11;Rps3a1;Rps23;Rps17;Rps26;Rpsa;Rpl19;Rpl36a;Rpl6;Rpl41;Rpl27;Rpl27a;Rpl34;Rps13
GO:0006281	DNA repair	biological_process	72	1.7064e-21	3.57928	Fancl;Ube2t;Pcna;Trip12;Dot1l;Brca2;Hrob;Ercc1;Zranb3;Rfc3;Pold4;Rtel1;Gen1;Wdhd1;Nono;Msh5;Bard1;Rmi2;Rad54l;Exo1;Slf2;Rad51c;Pttg1;Faap24;Dclre1b;Nsmce2;Fanca;Timeless;Usp1;Aunip;Fancb;Rbbp8;Fen1;Palb2;Nsmce1;Rrm1;Rad18;Mre11a;Primpol;Rps3;Apex2;Rad51;Parp1;Brca1;Blm;Ttf2;Usp28;Uimc1;Npm1;Rpain;Rfc4;Topbp1;Fancg;Sfpq;Actl6a;Usp3;Pold3;Pif1;Lig1;Pold1;Traip;Polh;Polq;Hspa1a;Inip;Dclre1a;Rad51ap1…
GO:0007049	cell cycle	biological_process	93	1.00235e-19	2.80748	Brca2;Kmt5a;Ccnd1;Cdc45;Dusp1;Pttg1;Fam83d;Casp8ap2;Hells;Nsmce2;Timeless;Sgo2a;Rbbp8;Zwilch;Chfr;E2f4;Mcm4;Mcm7;Lin9;E2f2;Rbm38;Nasp;Sde2;Anapc1;Nsl1;Rps3;Rhoa;Cks2;Anxa11;Rps6ka3;Apex2;Brca1;Cenpw;Arf6;Cdk20;Septin2;Gmnn;Nup37;Snx18;Hjurp;Chtf18;Rcc1;Phf13;Oip5;Ska2;Cdca2;Nup43;Kntc1;Aurka;Cntrl;Pkn2;Bora;Mastl;Vrk1;Pkmyt1;Dscc1;Sapcd2;Ect2;Hmga2;Incenp;Tfdp1;Gpsm2;Smc2;Dsn1;Ccne2;Usp3;Suv39h1;…
GO:0140236	translation at presynapse	biological_process	23	1.26767e-17	9.36599	Rpl29;Rps10;Rps24;Rpl35;Rps5;Rpl15;Rpl7a;Rpl28;Rpl4;Rpl22;Rps27a;Rpl7;Rps15a;Rpl23a;Rps14;Rpl13;Rps11;Rps26;Rpl36a;Rpl6;Rpl27;Rpl27a;Rpl34
GO:0140242	translation at postsynapse	biological_process	23	2.31463e-17	9.17086	Rpl29;Rps10;Rps24;Rpl35;Rps5;Rpl15;Rpl7a;Rpl28;Rpl4;Rpl22;Rps27a;Rpl7;Rps15a;Rpl23a;Rps14;Rpl13;Rps11;Rps26;Rpl36a;Rpl6;Rpl27;Rpl27a;Rpl34
GO:0006974	DNA damage response	biological_process	76	4.48348e-16	2.78122	Fancl;Ube2t;Pcna;Trip12;Brca2;Hrob;Ercc1;Zranb3;Pagr1a;Pold4;Rtel1;Gen1;Pmaip1;Ccnd1;Nono;Msh5;Bard1;Rad54l;Exo1;Slf2;Rad51c;Pttg1;Faap24;Dclre1b;Nsmce2;Fanca;Timeless;Usp1;Aunip;Fancb;Rbbp8;Fen1;Palb2;Nsmce1;Mcm7;Rad18;Mre11a;Primpol;Rps3;Apex2;Rad51;Parp1;Brca1;Blm;Usp28;Uimc1;Zdhhc16;Topbp1;Vrk1;Fancg;Sfpq;Atad5;Actl6a;Usp3;Pold3;Pif1;Suv39h1;Ddias;Pidd1;Wdr76;Lig1;Pold1;Traip;Rad54b;Polh;Polq…
GO:0051301	cell division	biological_process	62	2.28961e-15	3.07417	Kmt5a;Ccnd1;Pttg1;Fam83d;Hells;Nsmce2;Timeless;Sgo2a;Rbbp8;Zwilch;Chfr;Sde2;Anapc1;Nsl1;Rps3;Rhoa;Cks2;Anxa11;Cenpw;Arf6;Cdk20;Septin2;Nup37;Snx18;Rcc1;Phf13;Oip5;Ska2;Cdca2;Nup43;Kntc1;Aurka;Cntrl;Pkn2;Bora;Mastl;Vrk1;Sapcd2;Ect2;Hmga2;Incenp;Gpsm2;Smc2;Dsn1;Ccne2;Pdcd6ip;Ncapd2;Ccng1;Cdc25c;Lig1;Zfp207;Ncapg2;Tacc3;Ube2i;Mad2l1;Racgap1;Ccnf;Mitd1;Dclre1a;Ube2s;Mcmbp;Cenpt
GO:0006260	DNA replication	biological_process	32	2.62495e-15	5.32569	Pola1;Pcna;Prim2;Rfc3;Pold4;Rtel1;Recql4;Rmi2;Orc1;Cdc45;Fen1;Mcm4;Mcm7;Rrm1;Nasp;Sde2;Blm;Chtf18;Rfc4;Orc6;Dscc1;Pola2;Pold3;Pif1;Lig1;Pold1;Polh;Polq;Wrn;Prim1;Mcmbp;Tbrg1
GO:0007059	chromosome segregation	biological_process	30	1.17751e-14	5.41675	Cenph;Pttg1;Sgo2a;Nsl1;Rps3;Cenpp;Brca1;Cenpw;Nup37;Cenpk;Hjurp;Firrm;Chtf18;Rcc1;Phf13;Oip5;Ska2;Cdca2;Nup43;Cenpn;Incenp;Dsn1;Cenpu;Zfp207;Ube2i;Cenpl;Ciao2a;Cenpm;Cenpo;Cenpt
GO:0042274	ribosomal small subunit biogenesis	biological_process	22	5.45374e-12	5.93045	Rps25;Nop58;Rps24;Rps8;Utp11;Rps5;Bms1;Heatr1;Rps7;Rps15a;Npm1;Utp20;Rps14;Rps11;Utp18;Rps3a1;Rps23;Rps17;Fbl;Wdr3;Emg1;Rps13
DEGs downregulated at both 3 and 14 day post-SCI compared to sham
id	Term	Category	ListHits	p-value	Enrichment_score	geneID
GO:0007268	chemical synaptic transmission	biological_process	87	3.25583e-42	5.02233	Gjd2;Nlgn1;Pnoc;Gabrb3;Glra1;Nrxn2;Grm7;Glra4;Gabrb2;Gabra1;Fgf12;Dlgap1;Cacnb2;Htr2a;Htr1b;Grm5;Syp;Htr1d;Nrxn3;Cdh8;Syt10;Gria2;Apba2;Glra3;Dlg2;Gabrg2;Dlg3;Slitrk5;Ptchd1;Chrm3;Kcnma1;Chrm2;Cacna1g;Slc18a3;Cartpt;Sv2c;Grin2c;Npy5r;Htr1f;Glrb;Cacna1e;Htr1a;Gabrq;Gabra5;Unc13a;Nlgn4l;Pcdh8;Sv2a;Apba1;Gabrg1;Htr7;Hrh2;Chrm5;Dmxl2;Htr6;Unc13c;Sv2b;Gria4;Grm8;Dlg4;Clstn1;Chat;Cacnb1;Nrxn1;Gabra3;Sn…
GO:0006811	monoatomic ion transport	biological_process	165	1.72582e-30	2.52415	Smdt1;Slc8a2;Grin2d;Atp6v0e2;Kcns3;Kcnb2;Hcn4;Grik4;Scn4b;Gabrb3;Tmem63c;Slc8a3;Slc9a7;Ttyh1;Glra1;Gabra2;Glra4;Scn2b;Gabrb2;Kcna1;Slc24a2;Kcnk9;Gabra1;Nalcn;Asic1;Kcnj10;Cacnb2;Hcn3;Kcnc2;Tmc3;Gria3;Grid1;Slc5a11;Kcnj6;Kcnh1;Slc9a5;Kcnj9;Slc30a9;Dmac2l;Nipa1;Grin3b;Scn1b;Kcnk4;Atp6v0a1;Slc30a3;Scn8a;Scn1a;Cacng8;Asic4;Slc5a1;Lhfpl5;Pkd2l1;Slc22a17;Clcn6;Atp2a2;Clcn3;Kcnh7;Gria2;Clic5;Kcna4;Glra3…
GO:0034765	regulation of monoatomic ion transmembrane transport	biological_process	66	8.90794e-28	4.38983	Kcns3;Kcnb2;Hcn4;Scn4b;Scn2b;Kcna1;Nalcn;Kcnj10;Cacnb2;Hcn3;Kcnc2;Kcnj6;Kcnh1;Kcnj9;Scn1b;Kcnk4;Scn8a;Scn1a;Cacng8;Kcnh7;Clic5;Kcna4;Kcnc1;Kcnc4;Cacna2d2;Kcnj12;Kcng1;Kcnb1;Kcnh2;Kcnj16;Cacng3;Kcnma1;Kcnu1;Kcnd2;Kcnab2;Kcng4;Cacng7;Kcnip1;Cacna1e;Hcn2;Kcnip4;Cacna2d3;Kcnq5;Kcns2;Kcnh5;Kcnj3;Kcnd3;Scn3a;Scn2a;Asic2;Kcna2;Kcnq2;Kcnq3;Kcnab3;Kcnj11;Scn3b;Cacnb1;Cacna2d1;Kcnj14;Cacnb4;Hcn1;Kcnab1;Cac…
GO:0006813	potassium ion transport	biological_process	58	2.86865e-21	3.88589	Kcns3;Kcnb2;Hcn4;Slc9a7;Kcna1;Slc24a2;Kcnk9;Kcnj10;Hcn3;Kcnc2;Kcnj6;Kcnh1;Kcnj9;Kcnk4;Kcnh7;Kcnn2;Kcna4;Kcnc1;Kcnc4;Kcnmb2;Kcnj12;Nsf;Kcng1;Kcnb1;Kcnh2;Kcnj16;Kcnma1;Kcnu1;Kcnd2;Kcnab2;Kcng4;Kcnip1;Kcnn1;Tmem38a;Kcnk3;Hcn2;Kcnip4;Kcnq5;Kcns2;Kcnh5;Kcnj3;Atp1b1;Kcnd3;Kcna2;Kcnq2;Kcnq3;Kcnab3;Kcnj11;Atp1a3;Nos1;Kcnt1;Kcnj14;Hcn1;Kcnab1;Kcnf1;Slc12a5;Kcnk1;Kcnc3
GO:0050804	modulation of chemical synaptic transmission	biological_process	56	2.92915e-20	3.83589	Arhgap44;Grik4;Nlgn1;Dlgap3;Dlgap1;Gria3;Grid1;Prkar1b;Abr;L1cam;Grm5;Ppp1r9a;Grin3b;Nrg3;Mapk9;Lrrc4c;Gria2;Kcnn2;Dgkb;Cntnap4;Pde4a;Ppp3ca;Cbln2;Psmc5;Lrrc4;Grik3;Arc;Pfn2;Bdnf;Nlgn4l;Pcdh8;Camkv;Dlgap2;Shank1;Lrfn2;Gria4;Slc4a8;Drd2;Chrna7;Shank3;Cdkl5;Prkaca;Grid2;Plppr4;Dnm1;Grin3a;Adcy1;Dgke;Grm3;Grin2a;Cacna1b;Plcb4;Ephb1;Baiap3;Iqsec2;Ntng1
GO:0051965	positive regulation of synapse assembly	biological_process	40	2.63989e-19	4.83092	Lrrc24;Nlgn1;Wnt7a;Clstn2;Flrt1;Lrrtm1;Ube2v2;Slitrk5;Amigo1;Lrrtm3;Cbln2;Il1rapl1;Lrtm2;Lrrtm4;Bdnf;Adgrb1;Lingo4;Adgrl3;Lrrn1;Stau2;Asic2;Adgrb3;Dlg4;Slitrk1;Lrrtm2;Clstn3;Clstn1;Cux2;Nrxn1;Slitrk4;Grid2;Oxtr;Lrrc4b;Syndig1;Xlr3b;Cbln1;Slitrk3;Lingo2;Ephb1;Adgrl1
GO:0042391	regulation of membrane potential	biological_process	47	1.71901e-18	4.06982	Cnih2;Hcn4;Gabrb3;Glra1;Glra4;Gabrb2;Popdc3;Kcna1;Pex5l;Asic1;Kcnj10;Hcn3;Kcnh1;Scn1a;Rims4;Glra3;Chrna2;Kcnh2;Kcnma1;Cacna1g;Cacna1i;Grin2c;Kif5b;Glrb;Grik3;Hcn2;Gabrq;Kcnh5;Slc1a6;Rims2;Rims1;Asic2;Kcnq2;Slc4a8;Kcnj11;Chrna4;Chrna7;Rims3;Actn2;Cacnb4;Hcn1;Chrnb2;Cacng2;Grin2a;Glra2;Grin1;Dpp6
GO:0071805	potassium ion transmembrane transport	biological_process	52	1.91817e-18	3.75823	Kcns3;Kcnb2;Hcn4;Slc9a7;Kcna1;Slc24a2;Kcnk9;Nalcn;Kcnj10;Hcn3;Kcnc2;Kcnk12;Kcnh1;Slc9a5;Kcnk4;Pkd2l1;Kcnh7;Kcnn2;Kcna4;Kcnc1;Kcnc4;Kcnk10;Kcng1;Kcnb1;Kcnh2;Kcnma1;Kcnu1;Kcnd2;Kcng4;Slc9a6;Kcnip1;Kcnn1;Tmem38a;Kcnk3;Hcn2;Kcnip4;Kcnq5;Kcns2;Kcnh5;Kcnd3;Kcna2;Kcnq2;Kcnq3;Kcnj11;Kcng2;Kcnt1;Hcn1;Kcnf1;Slc12a5;Kcnk1;Kcnc3;Dpp6
GO:0007613	memory	biological_process	47	3.93271e-17	3.81771	Slc8a2;Shisa7;Syt11;Gabrb3;Lmx1b;Slc8a3;Cnr1;Pde4d;Grm7;Slc24a2;Map1a;Jph3;Asic1;Htr2a;Glp1r;Slc1a1;Cck;Nrg1;Abcc8;Syt4;Shank2;Crtc1;Tafa2;Plcb1;Neto1;Mapt;Slc6a1;Bdnf;Htr7;Hrh2;Sorcs3;Ppp1r1b;Scn2a;Pak6;Kcnq2;Crhr1;Chat;Chrna7;Shank3;Atp1a3;Oxtr;Chrnb2;Grin2a;Grin2b;Grin1;Hrh3;Pak5
GO:0007269	neurotransmitter secretion	biological_process	23	2.14086e-16	6.81004	Ptprn2;Wnt7a;Stxbp1;Nrxn2;Snap25;Asic1;Lin7b;Nrxn3;Syt1;Syt4;Syn2;Unc13a;Rims2;Lin7a;Rims1;Syn3;Nrxn1;Snca;Syn1;Cacna1b;Snap91;Ppfia3;Brsk1
DEGs specifically downregulated at 3 days post-SCI compared to sham
id	Term	Category	ListHits	p-value	Enrichment_score	geneID
GO:0007399	nervous system development	biological_process	57	8.87278e-08	2.09795	Tnik;Epha4;Adcyap1;Ret;Grik1;Ntrk2;Gfra2;Sema6c;Cables1;Efna5;Kifbp;Sema4f;Barhl2;Hdac5;Dcx;Kalrn;Acvr1b;Nrn1l;Fgf13;Sema5b;Robo1;Pou4f1;Pura;Epm2a;Ldb2;Sema4g;Fzd3;Dcdc2a;Tyro3;Prdm8;Ndnf;Sema4d;Efnb3;Epha8;Brinp2;Drgx;Sema6d;Adgrg1;Robo2;Gata3;Pou3f2;Dll3;Myt1;Insm1;Chrna3;Cyb5d2;Sema3a;Gpsm1;Nrbp2;Plxnb3;Vxn;Dpysl2;Cspg5;Hsd17b7;Fnbp1;Ntrk3;Ntf3
GO:0003341	cilium movement	biological_process	15	1.93095e-07	4.83081	Dnah9;Dnai4;Ttc29;Dnali1;Rsph4a;Hydin;Dnah2;Dnah5;Ttll3;Dync1h1;Ccdc39;Pierce1;Odad3;Nme5;Odad4
GO:0001764	neuron migration	biological_process	27	3.7064e-07	2.93931	Reln;Ntrk2;Fktn;Septin4;Barhl2;Dcx;Fgf13;Astn2;Auts2;Pou4f1;Ulk1;Pax6;Dcdc2a;Tyro3;Ndnf;Bbs1;Astn1;Tlx3;Drgx;Kirrel3;Itga3;Gata3;Gja1;Cckar;Barhl1;Sema3a;Ntrk3
GO:0007420	brain development	biological_process	31	8.7031e-06	2.33764	Matcap1;Reln;Aatk;Arnt2;Ccdc141;Fktn;Septin4;Pou3f4;Nog;Kdm4b;Nfasc;Dcx;Meis1;Dmbx1;Hydin;Id4;Nnat;Pax6;Nf1;Ift172;Mink1;Ccdc39;Odad3;Foxj1;Adgrg1;Odad4;Pou3f2;Amigo2;Ak7;Hsd17b7;Ntf3
GO:0007158	neuron cell-cell adhesion	biological_process	6	1.21394e-05	9.27515	Tnr;Nlgn2;Ret;Nlgn3;Astn2;Astn1
GO:0001755	neural crest cell migration	biological_process	13	1.22133e-05	4.01923	Sox8;Ret;Sema6c;Sema4f;Radil;Sema5b;Pax6;Sema4g;Sema4d;Isl1;Sema6d;Sema3a;Edn3
GO:0007411	axon guidance	biological_process	28	1.51607e-05	2.39138	Reln;Epha4;Sema6c;Efna5;Nog;Sema4f;Nfasc;Kalrn;Sema5b;Robo1;Pax6;Nectin1;Sema4g;Megf9;Sema4d;Pou4f2;Rtn4rl1;Efnb3;Epha8;Prtg;Drgx;Sema6d;Robo2;Ephb6;Gata3;Sema3a;Edn3;Ntf3
GO:0007626	locomotory behavior	biological_process	21	2.6772e-05	2.70525	Adra1b;Reln;Aph1b;Slc18a2;Ddhd2;Aplp2;Meis1;Gpr88;Adcy5;Myo6;Npy1r;Gng7;Astn1;Prkn;Sobp;Fign;Chrna3;Adcy8;Pcdh15;Abca2;Npas3
GO:0007275	multicellular organism development	biological_process	105	3.18607e-05	1.47963	Sfrp1;Shisa2;Nphs1;Reln;Tmeff1;Epha4;Ebf4;Fzd10;Wnt7b;Olig1;Vegfb;Ret;Plekhb1;Ggnbp1;Ntrk2;Ift81;Sema6c;Ctnnd2;Efna5;Hoxc9;Hoxc8;Nog;Kifbp;Sema4f;Barhl2;Pdgfd;Rspo2;Pfn4;Zar1;Dcx;Fgfr2;Meis1;Hoxb3;Radil;Dmbx1;Sema5b;Hydin;Sfrp5;Rbm11;Robo1;Pou4f1;Cnmd;Hoxc4;Nnat;Pax6;Asb1;Olfm1;Sema4g;Fzd3;Ift172;Nkd1;Tyro3;Txnrd3;Fzd9;Hey2;Wipf3;Sema4d;Tet1;Paqr7;Syna;Mturn;Pou4f2;Isl1;Paqr8;Tlx3;Msx1;Efnb3;Epha…
GO:0048712	negative regulation of astrocyte differentiation	biological_process	7	5.10108e-05	6.3653	Nog;Id4;Nf1;Dll3;Mycn;Gpr37l1;Ntrk3
DEGs specifically downregulated at 14 days post-SCI compared to sham
id	Term	Category	ListHits	p-value	Enrichment_score	geneID
GO:0048821	erythrocyte development	biological_process	4	0.000176565	14.0741	Hba-a1;Alas2;Slc4a1;Hba-a2
GO:0007017	microtubule-based process	biological_process	4	0.000325097	12.0635	Tubb4b;Dctn3;Tube1;Pafah1b1
GO:0035556	intracellular signal transduction	biological_process	12	0.000387684	3.22307	Oxsr1;Tiam1;Rapgef5;Mapk12;Dgki;Gucy2d;Spsb4;Tfrc;Depdc5;Socs5;Depdc1b;Stk32b
GO:0070131	positive regulation of mitochondrial translation	biological_process	3	0.000516344	18.6275	Rmnd1;Mrps27;Fastkd2
GO:0097401	synaptic vesicle lumen acidification	biological_process	3	0.000615303	17.5926	Atp6v1h;Atp6v1a;Atp6v1d
GO:0014841	skeletal muscle satellite cell proliferation	biological_process	2	0.00130637	35.1852	Rtl1;Kpna1
GO:0030323	respiratory tube development	biological_process	2	0.00130637	35.1852	Shh;Nkx2-9
GO:0070291	N-acylethanolamine metabolic process	biological_process	2	0.00130637	35.1852	Napepld;Gdpd1
GO:0010666	positive regulation of cardiac muscle cell apoptotic process	biological_process	3	0.00165175	12.6667	Tigar;Mapk8;Bnip3
GO:0006879	intracellular iron ion homeostasis	biological_process	4	0.00182739	7.67677	Abcb7;Atp6v1a;Tfrc;Alas2
