# Supplementary material for: Sequential Modulation of the cGAS-STING Pathway Promotes Spinal Cord Injury Repair
Source: Research Square preprint supplement (doi:10.21203/rs.3.rs-8596952/v1), 2026-01-22
Supplement: Supplementary file 3 [file 8597c1e8eba249c79a70abde.xlsx]

## Sheet: Summary
	Supplementary Table 4. RNA-seq analysis of spinal cord lesions at 3 and 14 days following sequential modulation of the cGAS-STING pathway.
	Supplementary Table 4.1. Overview of DEGs identified across treatment groups (|Fold Change| >=2 and FDR < 0.05)
	Supplementary Table 4.2. DEGs in the ADU-S100+C176-treated group compared to the vehicle group (|Fold Change| >=2 and FDR < 0.05)
	Supplementary Table 4.3. DEGs in the C176+ADU-S100-treated group compared to the vehicle group ( (|Fold Change| >=2 and FDR < 0.05))
	Supplementary Table 4.4. between the ADU-S100+C-176 and C-176+ADU-S100 treatment groups(|Fold Change| >=2 and FDR < 0.05)

## Sheet: DEG Statistics
Supplementary Table 4.1. DEGs statistics ( |Fold Change| >= 2 and FDR < 0.05)
Sambles	UP	DOWN
C176+ADU-S100-3d vs. Vehicle-3d	1	0
ADU-S100+C176-3d vs. Vehicle-3d	927	101
C176+ADU-S100-14d vs. Vehicle-14d	176	601
ADU-S100+C176-14d vs. Vehicle-14d	46	11
ADU-S100+C176-3d vs. C176+ADU-S100-3d	74	18
ADU-S100+C176-14d vs.C176+ADU-S100-14d	70	73
C176+ADU-S100-14d vs. C176-ADU-3d	1318	683
ADU-S100+C176-14d vs. ADU-S100+C176-3d	639	797

## Sheet: ADU-S100+C176 vs. Vehicle
Supplementary Table 4.2. DEGs in the ADU-S100+C176-treated group compared to the vehicle group ( |Fold Change| >= 2 and FDR < 0.05)
ADU-S100+C176-3d vs. Vehicle-3d																ADU-S100+C176-14d vs. Vehicle-14d
Id	Vehicle treatment			ADU-S100+C176 treatment			Average		log2(FC)	PValue	FDR (Q value)	Symbol	Status	Description		Id	Vehicle treatment			ADU-S100+C176 treatment			Average		log2(FC)	PValue	FDR (Q value)	Symbol	Status	Description
	S1-TPM	S2-TPM	S3-TPM	S1-TPM	S2-TPM	S3-TPM	Vehicle	ADU-S100+C176									S1-TPM	S2-TPM	S3-TPM	S1-TPM	S2-TPM	S3-TPM	Vehicle	ADU-S100+C176
ENSMUSG00000079186	0	0	0	3.108	3.774	6.069	0.001	4.317	12.0758	8.80683e-09	1.34486e-06	Gzmc	Up	granzyme C [Source:MGI Symbol;Acc:MGI:109256]		ENSMUSG00000059256	0	0	0	4.621	1.262	1.635	0.001	2.506	11.2912	2.25015e-06	0.00370805	Gzmd	Up	granzyme D [Source:MGI Symbol;Acc:MGI:109255]
ENSMUSG00000038580	0	0	0	1.634	4.235	4.914	0.001	3.59433	11.8115	7.31694e-06	0.000313593	Sct	Up	secretin [Source:MGI Symbol;Acc:MGI:99466]		ENSMUSG00000015441	0	0	0	4.611	0.588	1.96	0.001	2.38633	11.2206	8.06258e-06	0.00769212	Gzmf	Up	granzyme F [Source:MGI Symbol;Acc:MGI:109254]
ENSMUSG00000015441	0	0	0	0.657	0.556	3.291	0.001	1.50133	10.552	0.00011051	0.0027248	Gzmf	Up	granzyme F [Source:MGI Symbol;Acc:MGI:109254]		ENSMUSG00000022156	0	0	0	2.135	0.738	1.106	0.001	1.32633	10.3732	0.000228089	0.0439848	Gzme	Up	granzyme E [Source:MGI Symbol;Acc:MGI:109265]
ENSMUSG00000093701	0	0	0	0.27	2.407	1.768	0.001	1.48167	10.533	0.000523382	0.00922493	Gm21970	Up	predicted gene 21970 [Source:MGI Symbol;Acc:MGI:5439439]		ENSMUSG00000040284	0	0	0	1.793	0.743	1.362	0.001	1.29933	10.3436	0.000246857	0.0466122	Gzmg	Up	granzyme G [Source:MGI Symbol;Acc:MGI:109253]
ENSMUSG00000103442	0	0	0	0.38	0.425	0.114	0.001	0.306333	8.25896	3.07053e-05	0.000967032	Pcdha1	Up	protocadherin alpha 1 [Source:MGI Symbol;Acc:MGI:2150982]		ENSMUSG00000068252	0	0	0	0.293	0.109	1	0.001	0.467333	8.86831	0.000968145	0.0494194	Apol7b	Up	apolipoprotein L 7b [Source:MGI Symbol;Acc:MGI:3583950]
ENSMUSG00000071745	0	0	0	0.338	0.107	0.28	0.001	0.241667	7.91687	0.00450978	0.0460144	Pwwp4b	Up	PWWP domain containing 4B [Source:MGI Symbol;Acc:MGI:99870]		ENSMUSG00000117748	1.474	0	0	22.311	6.125	23.115	0.491333	17.1837	5.12819	0.000299338	0.0439626	Derpc	Up	DERPC proline and glycine rich nuclear protein [Source:MGI Symbol;Acc:MGI:6303050]
ENSMUSG00000036826	0	0	0.045	1.406	0.075	0.769	0.015	0.75	5.64386	0.00257189	0.0304274	Igflr1	Up	IGF-like family receptor 1 [Source:MGI Symbol;Acc:MGI:3655979]		ENSMUSG00000040629	0.072	0.078	0.078	1.054	2.535	0.291	0.076	1.29333	4.08895	0.00092636	0.0479169	Mael	Up	maelstrom spermatogenic transposon silencer [Source:MGI Symbol;Acc:MGI:2138453]
ENSMUSG00000021239	0.038	0	0	1.004	0.063	0.082	0.0126667	0.383	4.91824	0.00491166	0.0491491	Vsx2	Up	visual system homeobox 2 [Source:MGI Symbol;Acc:MGI:88401]		ENSMUSG00000074824	0	0	0.086	0.402	0.634	0.336	0.0286667	0.457333	3.9958	0.00031653	0.0152278	Rslcan18	Up	regulator of sex-limitation candidate 18 [Source:MGI Symbol;Acc:MGI:5433745]
ENSMUSG00000093536	0.038	0.035	0.168	6.178	0.576	0.439	0.0803333	2.39767	4.89949	4.67422e-06	0.000220052	Smim17	Up	small integral membrane protein 17 [Source:MGI Symbol;Acc:MGI:4365374]		ENSMUSG00000002324	0	0.055	0	0.398	0.247	0.103	0.0183333	0.249333	3.76553	0.000452684	0.0419684	Rec8	Up	REC8 meiotic recombination protein [Source:MGI Symbol;Acc:MGI:1929645]
ENSMUSG00000021685	0	0.043	0.04	1.774	0.154	0.134	0.0276667	0.687333	4.63479	0.00224637	0.0276004	Otp	Up	orthopedia homeobox [Source:MGI Symbol;Acc:MGI:99835]		ENSMUSG00000016529	0.084	0	0	0.249	0.363	0.334	0.028	0.315333	3.49338	0.000117265	0.00294419	Il10	Up	interleukin 10 [Source:MGI Symbol;Acc:MGI:96537]
ENSMUSG00000032758	0	0	0.456	1.025	7.375	0.252	0.152	2.884	4.24593	0.00268942	0.0314493	Kap	Up	kidney androgen regulated protein [Source:MGI Symbol;Acc:MGI:96653]		ENSMUSG00000039462	0.071	0.077	0.232	0.382	1.986	0.683	0.126667	1.017	3.00521	0.00052925	0.0457104	Col10a1	Up	collagen, type X, alpha 1 [Source:MGI Symbol;Acc:MGI:88445]
ENSMUSG00000040610	0.08	0	0.28	2.285	0.534	3.83	0.12	2.21633	4.20707	2.62831e-05	0.000858527	Tlx3	Up	T cell leukemia, homeobox 3 [Source:MGI Symbol;Acc:MGI:1351209]		ENSMUSG00000099583	0.531	0.289	0.419	1.631	1.731	0.606	0.413	1.32267	1.67924	0.000445432	0.0179181	H3c4	Up	H3 clustered histone 4 [Source:MGI Symbol;Acc:MGI:2448322]
ENSMUSG00000052301	0.057	0.049	0.32	4.39	2.551	0.505	0.142	2.482	4.12754	0.000203126	0.00442591	Doc2a	Up	double C2, alpha [Source:MGI Symbol;Acc:MGI:109446]		ENSMUSG00000026064	0.142	0.378	0.195	1.188	0.502	0.582	0.238333	0.757333	1.66795	0.000914488	0.0262324	Ptp4a1	Up	protein tyrosine phosphatase 4a1 [Source:MGI Symbol;Acc:MGI:1277096]
ENSMUSG00000040136	0.043	0.163	0.044	2.57	0.335	0.759	0.0833333	1.22133	3.87342	3.41385e-06	0.00017043	Abcc8	Up	ATP-binding cassette, sub-family C member 8 [Source:MGI Symbol;Acc:MGI:1352629]		ENSMUSG00000021403	0.272	0.259	0.149	0.367	0.665	1.038	0.226667	0.69	1.60602	0.000313671	0.044773	Serpinb9b	Up	serine (or cysteine) peptidase inhibitor, clade B, member 9b [Source:MGI Symbol;Acc:MGI:894668]
ENSMUSG00000091204	0.585	0	0	3.613	0.881	3.745	0.195	2.74633	3.81596	0.000988828	0.0150689	Exoc1l	Up	exocyst complex component 1 like [Source:MGI Symbol;Acc:MGI:3647743]		ENSMUSG00000079071	0.221	0.167	0.162	0.593	0.645	0.425	0.183333	0.554333	1.59628	0.000240547	0.0401914	Slc28a2b	Up	solute carrier family 28 member 2b [Source:MGI Symbol;Acc:MGI:3702173]
ENSMUSG00000045246	0.643	0.268	0.339	13.236	2.982	0.795	0.416667	5.671	3.76664	0.000185167	0.00411351	Kcng4	Up	potassium voltage-gated channel, subfamily G, member 4 [Source:MGI Symbol;Acc:MGI:1913983]		ENSMUSG00000027219	0.649	0.636	0.39	1.221	2.641	1.114	0.558333	1.65867	1.57083	0.000640848	0.0213935	Slc28a2	Up	solute carrier family 28 (sodium-coupled nucleoside transporter), member 2 [Source:MGI Symbol;Acc:MGI:1913105]
ENSMUSG00000025905	0	0.141	0	1.461	0.314	0.074	0.047	0.616333	3.71298	0.00427059	0.0444083	Oprk1	Up	opioid receptor, kappa 1 [Source:MGI Symbol;Acc:MGI:97439]		ENSMUSG00000079277	0.204	0.588	0.372	0.776	0.698	1.851	0.388	1.10833	1.51426	0.00025761	0.0415823	Hoxd3	Up	homeobox D3 [Source:MGI Symbol;Acc:MGI:96207]
ENSMUSG00000003872	0.404	0.308	0	7.232	0.974	0.968	0.237333	3.058	3.6876	0.0010561	0.015832	Lin7b	Up	lin-7 homolog B, crumbs cell polarity complex component [Source:MGI Symbol;Acc:MGI:1330858]		ENSMUSG00000035296	0.085	0.093	0.093	0.34	0.119	0.288	0.0903333	0.249	1.46282	0.00035652	0.0471122	Sgcg	Up	sarcoglycan, gamma (dystrophin-associated glycoprotein) [Source:MGI Symbol;Acc:MGI:1346524]
ENSMUSG00000010080	0.063	0.117	0.055	1.711	0.448	0.847	0.0783333	1.002	3.67711	3.03539e-06	0.000157047	Epn3	Up	epsin 3 [Source:MGI Symbol;Acc:MGI:1919139]		ENSMUSG00000060981	3.001	3.07	6.437	11.549	13.9	8.459	4.16933	11.3027	1.43877	0.000362217	0.0161722	H4c8	Up	H4 clustered histone 8 [Source:MGI Symbol;Acc:MGI:2448427]
ENSMUSG00000025370	0.085	0	0.037	0.553	0.058	0.93	0.0406667	0.513667	3.65891	0.0013808	0.0190957	Cdh9	Up	cadherin 9 [Source:MGI Symbol;Acc:MGI:107433]		ENSMUSG00000038179	5.497	2.604	2.579	4.652	18.386	5.503	3.56	9.51367	1.41812	0.000555935	0.0197379	Slamf7	Up	SLAM family member 7 [Source:MGI Symbol;Acc:MGI:1922595]
ENSMUSG00000068327	0.444	0	0	1.405	0.306	3.883	0.148	1.86467	3.65525	0.001203	0.01735	Tlx2	Up	T cell leukemia, homeobox 2 [Source:MGI Symbol;Acc:MGI:1350935]		ENSMUSG00000031285	0.844	0.983	0.587	2.573	1.599	2.054	0.785	2.07533	1.40258	0.00246684	0.0204975	Dcx	Up	doublecortin [Source:MGI Symbol;Acc:MGI:1277171]
ENSMUSG00000057777	0.219	0.203	0.288	5.415	1.968	1.473	0.236667	2.952	3.64076	1.5537e-08	2.17183e-06	Mab21l2	Up	mab-21-like 2 [Source:MGI Symbol;Acc:MGI:1346022]		ENSMUSG00000074677	8.739	8.062	5.604	18.33	24.307	16.237	7.46833	19.6247	1.39381	1.45134e-07	0.000672633	Sirpb1c	Up	signal-regulatory protein beta 1C [Source:MGI Symbol;Acc:MGI:3807521]
ENSMUSG00000032269	0.352	0	0.054	2.493	0.72	1.72	0.135333	1.64433	3.60291	5.49978e-05	0.00156649	Htr3a	Up	5-hydroxytryptamine (serotonin) receptor 3A [Source:MGI Symbol;Acc:MGI:96282]		ENSMUSG00000037994	1.124	1.408	1.522	3.171	1.595	5.176	1.35133	3.314	1.29419	0.00256768	0.041551	Slc9b2	Up	solute carrier family 9, subfamily B (NHA2, cation proton antiporter 2), member 2 [Source:MGI Symbol;Acc:MGI:2140077]
ENSMUSG00000037849	0.04	0.037	0.101	1.189	0.638	0.307	0.0593333	0.711333	3.58361	0.000428322	0.00792618	Ifi206	Up	interferon activated gene 206 [Source:MGI Symbol;Acc:MGI:3646410]		ENSMUSG00000029254	1.757	3.087	4.146	5.704	6.654	8.502	2.99667	6.95333	1.21435	0.000530317	0.0194791	Stap1	Up	signal transducing adaptor family member 1 [Source:MGI Symbol;Acc:MGI:1926193]
ENSMUSG00000025498	38.989	32.753	10.513	282.221	318.833	366.315	27.4183	322.456	3.55589	1.09265e-26	9.92784e-23	Irf7	Up	interferon regulatory factor 7 [Source:MGI Symbol;Acc:MGI:1859212]		ENSMUSG00000056116	24.522	30.156	25.999	42.614	62.419	78.215	26.8923	61.0827	1.18357	1.48427e-07	0.000672633	H2-T22	Up	histocompatibility 2, T region locus 22 [Source:MGI Symbol;Acc:MGI:95956]
ENSMUSG00000058441	0.974	1.003	0.475	20.054	4.07	3.642	0.817333	9.25533	3.50129	7.3415e-11	2.8385e-08	Panx2	Up	pannexin 2 [Source:MGI Symbol;Acc:MGI:1890615]		ENSMUSG00000058897	3.004	3.199	3.211	6.511	10.788	4.046	3.138	7.115	1.18102	1.34836e-05	0.010137	Col25a1	Up	collagen, type XXV, alpha 1 [Source:MGI Symbol;Acc:MGI:1924268]
ENSMUSG00000038276	0.384	0	0.135	2.69	0.221	2.824	0.173	1.91167	3.46599	0.000412669	0.00773892	Asic3	Up	acid-sensing ion channel 3 [Source:MGI Symbol;Acc:MGI:2159339]		ENSMUSG00000005800	1.369	3.223	1.298	2.778	5.238	5.338	1.96333	4.45133	1.18093	0.00053975	0.0195618	Mmp8	Up	matrix metallopeptidase 8 [Source:MGI Symbol;Acc:MGI:1202395]
ENSMUSG00000020686	0	0.088	0.041	0.566	0.279	0.579	0.043	0.474667	3.46451	0.00466385	0.0472944	Gas2l2	Up	growth arrest-specific 2 like 2 [Source:MGI Symbol;Acc:MGI:3652048]		ENSMUSG00000034435	1.886	1.849	1.012	4.868	2.801	3.086	1.58233	3.585	1.17992	0.000324202	0.0154558	Tmem30b	Up	transmembrane protein 30B [Source:MGI Symbol;Acc:MGI:2442082]
ENSMUSG00000027209	0.149	0	0.134	2.211	0.275	0.554	0.0943333	1.01333	3.4252	0.00197156	0.025054	Fam227b	Up	family with sequence similarity 227, member B [Source:MGI Symbol;Acc:MGI:1923073]		ENSMUSG00000022054	72.033	61.457	77.658	178.108	124.747	175.301	70.3827	159.385	1.17923	0.000789287	0.00427119	Nefm	Up	neurofilament, medium polypeptide [Source:MGI Symbol;Acc:MGI:97314]
ENSMUSG00000025221	1.767	0.521	0.915	11.076	2.429	20.17	1.06767	11.225	3.39418	5.60217e-09	9.08952e-07	Kcnip2	Up	Kv channel-interacting protein 2 [Source:MGI Symbol;Acc:MGI:2135916]		ENSMUSG00000095028	4.111	3.327	0.968	3.403	5.241	10.165	2.802	6.26967	1.16193	0.00329114	0.0458403	Sirpb1b	Up	signal-regulatory protein beta 1B [Source:MGI Symbol;Acc:MGI:3779828]
ENSMUSG00000009075	1.997	2.575	1.467	50.412	9.16	3.854	2.013	21.142	3.39269	0.000294755	0.0059055	Cabp7	Up	calcium binding protein 7 [Source:MGI Symbol;Acc:MGI:2183437]		ENSMUSG00000062380	99.553	68.779	90.419	143.354	253.052	172.562	86.2503	189.656	1.13678	6.34733e-05	0.00180966	Tubb3	Up	tubulin, beta 3 class III [Source:MGI Symbol;Acc:MGI:107813]
ENSMUSG00000050211	0.191	0.076	0.096	2.159	0.594	0.993	0.121	1.24867	3.36731	2.48913e-07	2.0862e-05	Pla2g4e	Up	phospholipase A2, group IVE [Source:MGI Symbol;Acc:MGI:1919144]		ENSMUSG00000059430	2.739	2.528	3.268	5.711	3.446	9.273	2.845	6.14333	1.11059	0.0126968	0.0306943	Actg2	Up	actin, gamma 2, smooth muscle, enteric [Source:MGI Symbol;Acc:MGI:104589]
ENSMUSG00000030495	0.877	1.552	0.605	21.938	6.924	2.143	1.01133	10.335	3.35321	3.06668e-08	3.74012e-06	Slc7a10	Up	solute carrier family 7 (cationic amino acid transporter, y+ system), member 10 [Source:MGI Symbol;Acc:MGI:1858261]		ENSMUSG00000020396	87.528	82.103	84.604	178.911	169.856	197.621	84.745	182.129	1.10376	0.000502733	0.00306731	Nefh	Up	neurofilament, heavy polypeptide [Source:MGI Symbol;Acc:MGI:97309]
ENSMUSG00000023484	18.16	2.968	2.636	92.653	19.308	127.776	7.92133	79.9123	3.3346	0.00171423	0.022508	Prph	Up	peripherin [Source:MGI Symbol;Acc:MGI:97774]		ENSMUSG00000063011	13.183	14.235	14.276	39.209	24.989	24.948	13.898	29.7153	1.09633	7.608e-06	0.00766168	Msln	Up	mesothelin [Source:MGI Symbol;Acc:MGI:1888992]
ENSMUSG00000026839	0.15	0.182	0.05	2.474	0.87	0.469	0.127333	1.271	3.31928	0.000398508	0.00751993	Upp2	Up	uridine phosphorylase 2 [Source:MGI Symbol;Acc:MGI:1923904]		ENSMUSG00000044026	10.7	12.322	10.311	30.862	22.948	17.399	11.111	23.7363	1.09511	1.60804e-06	0.0029149	Slc35g1	Up	solute carrier family 35, member G1 [Source:MGI Symbol;Acc:MGI:2444789]
ENSMUSG00000022212	2.457	1.018	1.08	21.598	8.593	14.833	1.51833	15.008	3.30517	6.986e-19	2.53899e-15	Cpne6	Up	copine VI [Source:MGI Symbol;Acc:MGI:1334445]		ENSMUSG00000015222	54.633	63.931	68.318	117.209	144.898	160.523	62.294	140.877	1.09118	0.000843432	0.00691806	Map2	Up	microtubule-associated protein 2 [Source:MGI Symbol;Acc:MGI:97175]
ENSMUSG00000039860	0.342	0.346	0.246	4.549	2.078	2.57	0.311333	3.06567	3.29967	5.75861e-08	6.19169e-06	Srrm3	Up	serine/arginine repetitive matrix 3 [Source:MGI Symbol;Acc:MGI:1920309]		ENSMUSG00000010122	40.466	28.746	29.067	89.219	67.365	52.529	32.7597	69.7043	1.08933	1.45398e-05	0.010137	Slc47a1	Up	solute carrier family 47, member 1 [Source:MGI Symbol;Acc:MGI:1914723]
ENSMUSG00000029151	0.351	1.07	0.216	13.163	2.251	0.681	0.545667	5.365	3.29749	1.11905e-05	0.000444974	Slc30a3	Up	solute carrier family 30 (zinc transporter), member 3 [Source:MGI Symbol;Acc:MGI:1345280]		ENSMUSG00000022595	18.115	13.595	15.806	42.358	35.822	22.6	15.8387	33.5933	1.08472	0.000795508	0.0114217	Lypd2	Up	Ly6/Plaur domain containing 2 [Source:MGI Symbol;Acc:MGI:1915561]
ENSMUSG00000060371	0.462	0.571	0.507	12.227	1.711	1.169	0.513333	5.03567	3.29421	8.11914e-06	0.000344722	Caln1	Up	calneuron 1 [Source:MGI Symbol;Acc:MGI:2155987]		ENSMUSG00000067212	37.459	49.464	35.4	64.958	84.8647	107.203	40.7743	84.8647	1.0575	3.96991e-05	0.0167584	H2-T23	Up	histocompatibility 2, T region locus 23 [Source:MGI Symbol;Acc:MGI:95957]
ENSMUSG00000035042	4.368	14.277	7.469	68.579	84.37	102.66	8.70467	85.203	3.29104	1.69152e-18	4.39119e-15	Ccl5	Up	C-C motif chemokine ligand 5 [Source:MGI Symbol;Acc:MGI:98262]		ENSMUSG00000053693	5.313	7.133	11.427	14.873	16.686	17.736	7.95767	16.4317	1.04606	0.000726967	0.037516	Mast1	Up	microtubule associated serine/threonine kinase 1 [Source:MGI Symbol;Acc:MGI:1861901]
ENSMUSG00000031491	0.253	0.078	0.037	0.707	0.07	2.755	0.122667	1.17733	3.26271	0.000812078	0.0129029	Chrna6	Up	cholinergic receptor, nicotinic, alpha polypeptide 6 [Source:MGI Symbol;Acc:MGI:106213]		ENSMUSG00000019851	21.593	21.745	15.437	40.401	36.827	43.479	19.5917	40.2357	1.03823	6.09389e-06	0.00690399	Perp	Up	PERP, TP53 apoptosis effector [Source:MGI Symbol;Acc:MGI:1929938]
ENSMUSG00000068246	0.948	2.11	1.268	20.348	11.08	9.758	1.442	13.7287	3.25105	1.66649e-17	3.36484e-14	Apol9b	Up	apolipoprotein L 9b [Source:MGI Symbol;Acc:MGI:1919148]		ENSMUSG00000040569	7.754	7.543	5.03	13.252	20.09	7.824	6.77567	13.722	1.01806	0.00110791	0.0325491	Slc26a7	Up	solute carrier family 26, member 7 [Source:MGI Symbol;Acc:MGI:2384791]
ENSMUSG00000090129	0.333	0.447	0.363	8.261	1.9	0.601	0.381	3.58733	3.23505	3.5652e-05	0.00108885	Or10ad1	Up	olfactory receptor family 10 subfamily AD member 1 [Source:MGI Symbol;Acc:MGI:3030121]		ENSMUSG00000022055	118.761	152.193	105.29	250.209	226.887	281.587	125.415	252.894	1.01183	0.000433224	0.00132973	Nefl	Up	neurofilament, light polypeptide [Source:MGI Symbol;Acc:MGI:97313]
ENSMUSG00000026452	2.29	2.267	1.613	45.288	5.976	6.79	2.05667	19.3513	3.23405	2.64134e-05	0.000858649	Syt2	Up	synaptotagmin II [Source:MGI Symbol;Acc:MGI:99666]		ENSMUSG00000051367	7.273	5.911	6.387	12.057	15.729	11.575	6.52367	13.1203	1.00805	1.18788e-06	0.00269158	Six1	Up	sine oculis-related homeobox 1 [Source:MGI Symbol;Acc:MGI:102780]
ENSMUSG00000055078	0.165	0.304	0.453	5.778	1.523	1.329	0.307333	2.87667	3.22652	2.83084e-06	0.000149541	Gabra5	Up	gamma-aminobutyric acid type A receptor subunit alpha 5 [Source:MGI Symbol;Acc:MGI:95617]		ENSMUSG00000074766	3.247	2.191	1.878	2.932	6.701	5.051	2.43867	4.89467	1.00512	0.00716456	0.0229862	Ism1	Up	isthmin 1, angiogenesis inhibitor [Source:MGI Symbol;Acc:MGI:2442963]
ENSMUSG00000033615	19.836	21.232	10.792	340.733	75.666	63.878	17.2867	160.092	3.21117	3.30456e-06	0.000166807	Cplx1	Up	complexin 1 [Source:MGI Symbol;Acc:MGI:104727]		ENSMUSG00000029675	89.04	90.158	83.383	168.773	144.238	213.391	87.527	175.467	1.0034	5.16455e-06	0.00624118	Eln	Up	elastin [Source:MGI Symbol;Acc:MGI:95317]
ENSMUSG00000059412	6.967	3.041	1.189	27.161	5.339	70.509	3.73233	34.3363	3.20159	0.00223683	0.0275205	Fxyd2	Up	FXYD domain-containing ion transport regulator 2 [Source:MGI Symbol;Acc:MGI:1195260]		ENSMUSG00000030703	14.937	12.36	1.265	1.23	0.589	0.392	9.52067	0.737	-3.69133	3.08285e-07	0.00111766	Gdpd3	Down	glycerophosphodiester phosphodiesterase domain containing 3 [Source:MGI Symbol;Acc:MGI:1915866]
ENSMUSG00000096146	0.078	0.216	0.275	3.845	0.586	0.737	0.189667	1.72267	3.18311	2.61423e-05	0.000857504	Kcnj11	Up	potassium inwardly rectifying channel, subfamily J, member 11 [Source:MGI Symbol;Acc:MGI:107501]		ENSMUSG00000026564	4.444	2.738	5.325	1.028	2.873	1.252	4.169	1.71767	-1.27925	0.000295921	0.0495812	Styxl2	Down	serine/threonine/tyrosine interacting like 2 [Source:MGI Symbol;Acc:MGI:2685055]
ENSMUSG00000029219	0.755	0.32	0.454	8.331	4.159	1.358	0.509667	4.616	3.17902	3.52018e-07	2.72207e-05	Slc10a4	Up	solute carrier family 10 (sodium/bile acid cotransporter family), member 4 [Source:MGI Symbol;Acc:MGI:3606480]		ENSMUSG00000035551	9.58	8.481	10.31	4.932	2.217	4.873	9.457	4.00733	-1.23874	0.000285768	0.048949	Igfbpl1	Down	insulin-like growth factor binding protein-like 1 [Source:MGI Symbol;Acc:MGI:1933198]
ENSMUSG00000064329	0.573	0.729	0.611	13.878	1.953	1.478	0.637667	5.76967	3.17761	0.000223948	0.00474865	Scn1a	Up	sodium channel, voltage-gated, type I, alpha [Source:MGI Symbol;Acc:MGI:98246]		ENSMUSG00000094622	1.738	1.462	1.282	0	1.206	0.72	1.494	0.642	-1.21853	6.10845e-05	0.0212938	Gm3055	Down	predicted gene 3055 [Source:MGI Symbol;Acc:MGI:3809197]
ENSMUSG00000019146	0.244	0.226	0.273	5.591	0.724	0.404	0.247667	2.23967	3.17681	8.70035e-06	0.000366063	Cacng2	Up	calcium channel, voltage-dependent, gamma subunit 2 [Source:MGI Symbol;Acc:MGI:1316660]		ENSMUSG00000102543	16.529	10.455	10.704	3.038	7.566	6.026	12.5627	5.54333	-1.18032	1.82608e-05	0.0111514	Pcdhgc5	Down	protocadherin gamma subfamily C, 5 [Source:MGI Symbol;Acc:MGI:1935205]
ENSMUSG00000036760	0.477	0.387	0.148	7.425	1.33	0.362	0.337333	3.039	3.17135	0.00343862	0.0378019	Kcnk9	Up	potassium channel, subfamily K, member 9 [Source:MGI Symbol;Acc:MGI:3521816]		ENSMUSG00000009292	17.333	8.811	10.437	3.158	8.58	4.565	12.1937	5.43433	-1.16596	0.000174034	0.0371142	Trpm2	Down	transient receptor potential cation channel, subfamily M, member 2 [Source:MGI Symbol;Acc:MGI:1351901]
ENSMUSG00000038760	0.072	0.159	0.121	2.18	0.758	0.229	0.117333	1.05567	3.16947	0.000373159	0.00710802	Trhr	Up	thyrotropin releasing hormone receptor [Source:MGI Symbol;Acc:MGI:98824]		ENSMUSG00000030110	25.206	35.532	56.901	9.193	23.952	20.225	39.213	17.79	-1.14027	8.25436e-05	0.0257977	Ret	Down	ret proto-oncogene [Source:MGI Symbol;Acc:MGI:97902]
ENSMUSG00000018634	0.199	0.138	0.175	3.143	0.956	0.506	0.170667	1.535	3.16899	7.28005e-05	0.00193411	Crhr1	Up	corticotropin releasing hormone receptor 1 [Source:MGI Symbol;Acc:MGI:88498]		ENSMUSG00000023945	5.766	7.312	5.21	1.426	4.174	2.825	6.096	2.80833	-1.11815	9.45471e-05	0.0274632	Slc5a7	Down	solute carrier family 5 (choline transporter), member 7 [Source:MGI Symbol;Acc:MGI:1927126]
ENSMUSG00000058057	0.37	0.137	0	1.463	0.186	2.854	0.169	1.501	3.15083	0.00183111	0.0236832	Tmt1a3	Up	thiol methyltransferase 1A3 [Source:MGI Symbol;Acc:MGI:3710670]		ENSMUSG00000042873	6.319	7.749	14.418	3.215	5.613	4.534	9.49533	4.454	-1.09212	9.54478e-05	0.0274632	Lhfpl4	Down	lipoma HMGIC fusion partner-like protein 4 [Source:MGI Symbol;Acc:MGI:3057108]
ENSMUSG00000062252	0	0.432	0.327	4.927	0.779	0.881	0.253	2.19567	3.11745	0.00168337	0.0221668	Lhfpl5	Up	lipoma HMGIC fusion partner-like 5 [Source:MGI Symbol;Acc:MGI:1915382]		ENSMUSG00000042401	18.095	14.061	16.223	6.937	7.983	8.596	16.1263	7.83867	-1.04074	2.28882e-05	0.0119884	Crtac1	Down	cartilage acidic protein 1 [Source:MGI Symbol;Acc:MGI:1920082]
ENSMUSG00000041014	0.251	0.17	0.241	2.809	1.351	1.54	0.220667	1.9	3.10606	5.43478e-08	5.87862e-06	Nrg3	Up	neuregulin 3 [Source:MGI Symbol;Acc:MGI:1097165]		ENSMUSG00000081683	21.207	25.159	22.565	11.834	12.598	9.836	22.977	11.4227	-1.00829	3.64957e-09	6.61558e-05	Fzd10	Down	frizzled class receptor 10 [Source:MGI Symbol;Acc:MGI:2136761]
ENSMUSG00000039728	0.737	1.4	1.079	22.833	3.258	1.583	1.072	9.22467	3.10519	0.00235097	0.0285002	Slc6a5	Up	solute carrier family 6 (neurotransmitter transporter, glycine), member 5 [Source:MGI Symbol;Acc:MGI:105090]
ENSMUSG00000050808	0.119	0.172	0.094	2.573	0.531	0.201	0.128333	1.10167	3.10172	0.000452836	0.00823817	Muc15	Up	mucin 15 [Source:MGI Symbol;Acc:MGI:2442110]
ENSMUSG00000045201	0.086	0.239	0.26	3.496	0.431	1.088	0.195	1.67167	3.09974	0.00136292	0.0188917	Lrrc3b	Up	leucine rich repeat containing 3B [Source:MGI Symbol;Acc:MGI:2384996]
ENSMUSG00000060257	0.504	0.267	0.221	4.804	1.596	2.017	0.330667	2.80567	3.08489	1.59374e-09	3.29108e-07	Scrt2	Up	scratch family zinc finger 2 [Source:MGI Symbol;Acc:MGI:2139287]
ENSMUSG00000021301	0.618	0.338	0.213	6.536	0.746	2.527	0.389667	3.26967	3.06883	6.73036e-10	1.71258e-07	Hecw1	Up	HECT, C2 and WW domain containing E3 ubiquitin protein ligase 1 [Source:MGI Symbol;Acc:MGI:2444115]
ENSMUSG00000046378	0.405	0.344	0.494	6.302	1.672	2.186	0.414333	3.38667	3.031	0.000214588	0.00459303	Asphd1	Up	aspartate beta-hydroxylase domain containing 1 [Source:MGI Symbol;Acc:MGI:2685014]
ENSMUSG00000034891	4.24	6.041	3.656	80.819	19.564	13.491	4.64567	37.958	3.03045	2.22383e-10	7.21631e-08	Sncb	Up	synuclein, beta [Source:MGI Symbol;Acc:MGI:1889011]
ENSMUSG00000040666	1.49	0.643	0.943	16.634	6.504	1.924	1.02533	8.354	3.02637	2.14766e-07	1.86733e-05	Sh3bgr	Up	SH3-binding domain glutamic acid-rich protein [Source:MGI Symbol;Acc:MGI:1354740]
ENSMUSG00000046480	1.89	1.251	1.099	24.564	3.735	6.035	1.41333	11.4447	3.0175	3.46743e-05	0.00106616	Scn4b	Up	sodium channel, type IV, beta [Source:MGI Symbol;Acc:MGI:2687406]
ENSMUSG00000032908	0.917	0.368	0.617	9.861	1.507	3.974	0.634	5.114	3.0119	4.75893e-09	8.00733e-07	Sgpp2	Up	sphingosine-1-phosphate phosphatase 2 [Source:MGI Symbol;Acc:MGI:3589109]
ENSMUSG00000062524	0.167	0.31	0.147	1.404	1.801	1.808	0.208	1.671	3.00606	0.000120681	0.00290852	Ncr1	Up	natural cytotoxicity triggering receptor 1 [Source:MGI Symbol;Acc:MGI:1336212]
ENSMUSG00000076612	0.33	0.51	0.193	0.435	7.178	0.641	0.344333	2.75133	2.99825	0.00232023	0.0282406	Ighg2c	Up	immunoglobulin heavy constant gamma 2C [Source:MGI Symbol;Acc:MGI:2686979]
ENSMUSG00000062372	0.018	0.064	0.09	0.817	0.333	0.22	0.0573333	0.456667	2.9937	0.000211832	0.00456764	Otof	Up	otoferlin [Source:MGI Symbol;Acc:MGI:1891247]
ENSMUSG00000054204	0.165	0.228	0.146	1.91	0.85	1.533	0.179667	1.431	2.99363	0.0003458	0.00670637	Alkal2	Up	ALK and LTK ligand 2 [Source:MGI Symbol;Acc:MGI:3697448]
ENSMUSG00000026959	1.325	2.269	2.08	32.036	7.993	5.153	1.89133	15.0607	2.99331	1.02799e-10	3.66286e-08	Grin1	Up	glutamate receptor, ionotropic, NMDA1 (zeta 1) [Source:MGI Symbol;Acc:MGI:95819]
ENSMUSG00000091636	0.586	0.395	0.234	7.787	1.113	0.775	0.405	3.225	2.99331	6.10888e-05	0.00169223	Akain1	Up	A kinase anchor inhibitor 1 [Source:MGI Symbol;Acc:MGI:2444600]
ENSMUSG00000031376	0.314	0.546	0.362	7.152	1.338	1.221	0.407333	3.237	2.99038	1.75881e-07	1.56972e-05	Atp2b3	Up	ATPase, Ca++ transporting, plasma membrane 3 [Source:MGI Symbol;Acc:MGI:1347353]
ENSMUSG00000037843	0.359	1.081	0.867	10.813	4.726	2.741	0.769	6.09333	2.98618	1.84682e-07	1.6371e-05	Vstm2l	Up	V-set and transmembrane domain containing 2-like [Source:MGI Symbol;Acc:MGI:2685537]
ENSMUSG00000067578	0.042	0.078	0.518	3.455	1.092	0.49	0.212667	1.679	2.98094	0.000619969	0.0105094	Cbln4	Up	cerebellin 4 precursor protein [Source:MGI Symbol;Acc:MGI:2154433]
ENSMUSG00000062785	1.812	1.24	1.115	25.585	4.424	2.799	1.389	10.936	2.97697	0.00024288	0.00506098	Kcnc3	Up	potassium voltage gated channel, Shaw-related subfamily, member 3 [Source:MGI Symbol;Acc:MGI:96669]
ENSMUSG00000078451	0.115	0.637	0.101	4.298	1.149	1.26	0.284333	2.23567	2.97505	0.00303701	0.0344928	Ppil6	Up	peptidylprolyl isomerase (cyclophilin)-like 6 [Source:MGI Symbol;Acc:MGI:1920325]
ENSMUSG00000056290	1.643	1.348	0.594	9.769	8.838	9.566	1.195	9.391	2.97427	6.53508e-10	1.69651e-07	Ms4a4b	Up	membrane-spanning 4-domains, subfamily A, member 4B [Source:MGI Symbol;Acc:MGI:1913083]
ENSMUSG00000044024	3.363	4.1	2.157	54.891	10.67	8.848	3.20667	24.803	2.95137	9.89371e-05	0.00249706	Rell2	Up	RELT-like 2 [Source:MGI Symbol;Acc:MGI:1918044]
ENSMUSG00000030302	2.745	2.531	2.368	43.842	9.145	5.852	2.548	19.613	2.94437	0.000424997	0.00790486	Atp2b2	Up	ATPase, Ca++ transporting, plasma membrane 2 [Source:MGI Symbol;Acc:MGI:105368]
ENSMUSG00000042532	0.78	1.646	1.255	17.888	5.034	5.325	1.227	9.41567	2.93993	3.2975e-11	1.3316e-08	Golga7b	Up	golgin A7B [Source:MGI Symbol;Acc:MGI:1918396]
ENSMUSG00000020734	0.029	0.159	0.176	2.075	0.526	0.187	0.121333	0.929333	2.93722	0.00122383	0.0175673	Grin2c	Up	glutamate receptor, ionotropic, NMDA2C (epsilon 3) [Source:MGI Symbol;Acc:MGI:95822]
ENSMUSG00000054477	0.414	0.273	0.515	7.333	0.935	0.924	0.400667	3.064	2.93494	0.000305343	0.00606414	Kcnn2	Up	potassium intermediate/small conductance calcium-activated channel, subfamily N, member 2 [Source:MGI Symbol;Acc:MGI:2153182]
ENSMUSG00000117286	0.127	0.079	0.018	1.009	0.113	0.576	0.0746667	0.566	2.92227	0.00233361	0.0283654	Gm1043	Up	predicted gene 1043 [Source:MGI Symbol;Acc:MGI:2685889]
ENSMUSG00000066677	0.144	0.064	0.15	0.97	0.808	0.925	0.119333	0.901	2.91653	7.08275e-05	0.00189276	Ifi208	Up	interferon activated gene 208 [Source:MGI Symbol;Acc:MGI:2442822]
ENSMUSG00000039059	0.154	0.295	0.159	3.486	0.718	0.368	0.202667	1.524	2.91068	0.000205361	0.00446925	Hrh3	Up	histamine receptor H3 [Source:MGI Symbol;Acc:MGI:2139279]
ENSMUSG00000015437	1.874	1.026	0.823	10.684	6.835	10.468	1.241	9.329	2.91022	3.35653e-13	2.54145e-10	Gzmb	Up	granzyme B [Source:MGI Symbol;Acc:MGI:109267]
ENSMUSG00000000308	5.547	8.517	6.165	107.235	28.843	15.758	6.743	50.612	2.90802	3.31909e-05	0.00103102	Ckmt1	Up	creatine kinase, mitochondrial 1, ubiquitous [Source:MGI Symbol;Acc:MGI:99441]
ENSMUSG00000030337	14.002	12.159	8.224	186.236	42.878	26.857	11.4617	85.3237	2.89613	4.72083e-05	0.00138143	Vamp1	Up	vesicle-associated membrane protein 1 [Source:MGI Symbol;Acc:MGI:1313276]
ENSMUSG00000021852	0	0.125	0.278	1.85	0.39	0.754	0.134333	0.998	2.89322	0.00290625	0.0333833	Slc35f4	Up	solute carrier family 35, member F4 [Source:MGI Symbol;Acc:MGI:1922538]
ENSMUSG00000030500	2.306	2.603	2.336	39.13	5.536	8.944	2.415	17.87	2.88744	8.28188e-05	0.00214385	Slc17a6	Up	solute carrier family 17 (sodium-dependent inorganic phosphate cotransporter), member 6 [Source:MGI Symbol;Acc:MGI:2156052]
ENSMUSG00000055567	0.921	0.809	0.458	12.197	1.996	1.808	0.729333	5.33367	2.87048	0.00135344	0.0188321	Unc80	Up	unc-80, NALCN activator [Source:MGI Symbol;Acc:MGI:2652882]
ENSMUSG00000034336	2.068	2.284	0.928	28.828	6.309	3.456	1.76	12.8643	2.86973	0.000553654	0.0095907	Ina	Up	internexin neuronal intermediate filament protein, alpha [Source:MGI Symbol;Acc:MGI:96568]
ENSMUSG00000015405	0	0.199	0.196	1.771	0.711	0.395	0.131667	0.959	2.86464	0.000681934	0.0112964	Ace2	Up	angiotensin converting enzyme 2 [Source:MGI Symbol;Acc:MGI:1917258]
ENSMUSG00000042581	0.098	0.018	0.017	0.486	0.166	0.315	0.0443333	0.322333	2.86209	0.00337075	0.0372074	Thsd7b	Up	thrombospondin, type I, domain containing 7B [Source:MGI Symbol;Acc:MGI:2443925]
ENSMUSG00000033061	6.384	11.063	14.356	149.661	49.324	31.513	10.601	76.8327	2.85752	5.34109e-11	2.10996e-08	Resp18	Up	regulated endocrine-specific protein 18 [Source:MGI Symbol;Acc:MGI:1098222]
ENSMUSG00000055409	0.399	0.457	0.254	5.79	1.462	0.779	0.37	2.677	2.85502	1.01301e-05	0.000409075	Nell1	Up	NEL-like 1 [Source:MGI Symbol;Acc:MGI:2443902]
ENSMUSG00000041660	0.365	0.563	0.719	8.49	1.555	1.827	0.549	3.95733	2.84965	0.00272304	0.0316591	Bbox1	Up	gamma-butyrobetaine hydroxylase 1 [Source:MGI Symbol;Acc:MGI:1891372]
ENSMUSG00000023132	3.023	3.193	1.59	14.676	14.988	26.506	2.602	18.7233	2.84714	4.01189e-12	2.08297e-09	Gzma	Up	granzyme A [Source:MGI Symbol;Acc:MGI:109266]
ENSMUSG00000022510	0.235	0.55	0.206	5.518	1.032	0.559	0.330333	2.36967	2.84269	1.34812e-05	0.000516838	Trp63	Up	transformation related protein 63 [Source:MGI Symbol;Acc:MGI:1330810]
ENSMUSG00000051062	0.244	0.075	0.572	4.903	0.884	0.592	0.297	2.12633	2.83983	0.00265573	0.0311769	Fbll1	Up	fibrillarin-like 1 [Source:MGI Symbol;Acc:MGI:3034689]
ENSMUSG00000027273	19.085	22.848	21.535	348.077	53.994	49.875	21.156	150.649	2.83205	0.000400192	0.00753604	Snap25	Up	synaptosomal-associated protein 25 [Source:MGI Symbol;Acc:MGI:98331]
ENSMUSG00000018865	11.344	8.613	6.078	106.457	28.832	49.985	8.67833	61.758	2.83114	4.2355e-17	7.69676e-14	Sult4a1	Up	sulfotransferase family 4A, member 1 [Source:MGI Symbol;Acc:MGI:1888971]
ENSMUSG00000022112	0.669	0.16	0.454	6.58	1.254	1.291	0.427667	3.04167	2.8303	1.17058e-05	0.000459915	Gpc5	Up	glypican 5 [Source:MGI Symbol;Acc:MGI:1194894]
ENSMUSG00000037771	1.05	1.743	1.382	22.762	5.264	1.654	1.39167	9.89333	2.82964	0.00226108	0.0277624	Slc32a1	Up	solute carrier family 32 (GABA vesicular transporter), member 1 [Source:MGI Symbol;Acc:MGI:1194488]
ENSMUSG00000056947	0.147	0.182	0.345	2.278	0.944	1.535	0.224667	1.58567	2.81923	1.85939e-05	0.000661231	Mab21l1	Up	mab-21-like 1 [Source:MGI Symbol;Acc:MGI:1333773]
ENSMUSG00000050357	0.729	0.676	0.486	7.944	2.71	2.557	0.630333	4.40367	2.80452	2.0106e-11	8.69921e-09	Carmil2	Up	capping protein regulator and myosin 1 linker 2 [Source:MGI Symbol;Acc:MGI:2685431]
ENSMUSG00000020396	26.184	12.261	5.646	199.269	50.533	57.281	14.697	102.361	2.80007	0.000224387	0.00475241	Nefh	Up	neurofilament, heavy polypeptide [Source:MGI Symbol;Acc:MGI:97309]
ENSMUSG00000043388	2.878	4.001	4.479	52.544	15.054	11.384	3.786	26.3273	2.79782	7.46027e-12	3.4761e-09	Tmem130	Up	transmembrane protein 130 [Source:MGI Symbol;Acc:MGI:3607706]
ENSMUSG00000054459	5.399	9.472	8.069	116.165	26.957	15.472	7.64667	52.8647	2.7894	0.000339191	0.0066064	Vsnl1	Up	visinin-like 1 [Source:MGI Symbol;Acc:MGI:1349453]
ENSMUSG00000048385	0.726	1.372	1.079	15.97	3.665	2.295	1.059	7.31	2.78717	5.79236e-08	6.19169e-06	Scrt1	Up	scratch family zinc finger 1 [Source:MGI Symbol;Acc:MGI:2176606]
ENSMUSG00000027584	0.734	0.737	0.961	11.022	4.152	1.59	0.810667	5.588	2.78515	2.08801e-08	2.76959e-06	Oprl1	Up	opioid receptor-like 1 [Source:MGI Symbol;Acc:MGI:97440]
ENSMUSG00000035653	0.44	0.314	0.342	4.803	0.974	1.687	0.365333	2.488	2.7677	4.89361e-07	3.61491e-05	Lrfn5	Up	leucine rich repeat and fibronectin type III domain containing 5 [Source:MGI Symbol;Acc:MGI:2144814]
ENSMUSG00000026976	0	0.105	0.255	1.463	0.639	0.347	0.12	0.816333	2.76612	0.00479835	0.0482544	Pax8	Up	paired box 8 [Source:MGI Symbol;Acc:MGI:97492]
ENSMUSG00000019785	0.315	0.459	0.277	5.429	1.129	0.589	0.350333	2.38233	2.76558	0.000115279	0.00280701	Clvs2	Up	clavesin 2 [Source:MGI Symbol;Acc:MGI:2443223]
ENSMUSG00000006711	0.456	0.141	0.156	2.381	0.781	1.914	0.251	1.692	2.75297	2.11382e-07	1.84675e-05	D130043K22Rik	Up	RIKEN cDNA D130043K22 gene [Source:MGI Symbol;Acc:MGI:3036268]
ENSMUSG00000022055	41.11	24.712	14.487	353.535	74.934	112.119	26.7697	180.196	2.7509	3.67106e-05	0.00111184	Nefl	Up	neurofilament, light polypeptide [Source:MGI Symbol;Acc:MGI:97313]
ENSMUSG00000058975	0.996	1.117	1.326	17.059	3.873	2.174	1.14633	7.702	2.74821	5.09751e-08	5.58024e-06	Kcnc1	Up	potassium voltage gated channel, Shaw-related subfamily, member 1 [Source:MGI Symbol;Acc:MGI:96667]
ENSMUSG00000017740	1.603	2.814	2.271	34.608	7.708	2.612	2.22933	14.976	2.74797	0.00114042	0.0167397	Slc12a5	Up	solute carrier family 12, member 5 [Source:MGI Symbol;Acc:MGI:1862037]
ENSMUSG00000022054	33.899	16.756	9.598	270.879	59.128	72.259	20.0843	134.089	2.73904	0.000112732	0.0027646	Nefm	Up	neurofilament, medium polypeptide [Source:MGI Symbol;Acc:MGI:97314]
ENSMUSG00000042425	0.318	0.372	0.147	4.08	0.923	0.584	0.279	1.86233	2.73877	2.79984e-06	0.000148768	Frmpd3	Up	FERM and PDZ domain containing 3 [Source:MGI Symbol;Acc:MGI:3646547]
ENSMUSG00000045034	0.244	0.226	0.294	4.141	0.382	0.532	0.254667	1.685	2.72607	0.000358682	0.00690462	Ankrd34b	Up	ankyrin repeat domain 34B [Source:MGI Symbol;Acc:MGI:2443245]
ENSMUSG00000047155	0.271	0.081	0.077	1.991	0.391	0.452	0.143	0.944667	2.72379	0.00023685	0.00496226	Cyp4x1	Up	cytochrome P450, family 4, subfamily x, polypeptide 1 [Source:MGI Symbol;Acc:MGI:1932403]
ENSMUSG00000021613	0.128	0.079	0.056	1.437	0.125	0.171	0.0876667	0.577667	2.72014	0.0032543	0.0362763	Hapln1	Up	hyaluronan and proteoglycan link protein 1 [Source:MGI Symbol;Acc:MGI:1337006]
ENSMUSG00000000263	0.409	0.569	0.449	7.974	1.019	0.372	0.475667	3.12167	2.71429	0.000996978	0.0151607	Glra1	Up	glycine receptor, alpha 1 subunit [Source:MGI Symbol;Acc:MGI:95747]
ENSMUSG00000021194	3.573	4.636	4.22	56.586	15.366	9.542	4.143	27.1647	2.71298	9.21724e-10	2.14738e-07	Chga	Up	chromogranin A [Source:MGI Symbol;Acc:MGI:88394]
ENSMUSG00000042258	0.51	0	0	1.585	0.122	1.635	0.17	1.114	2.71214	0.00137735	0.0190626	Isl1	Up	ISL1 transcription factor, LIM/homeodomain [Source:MGI Symbol;Acc:MGI:101791]
ENSMUSG00000021919	0.428	0.198	0.471	5.693	0.966	0.474	0.365667	2.37767	2.70095	0.000105426	0.00262078	Chat	Up	choline acetyltransferase [Source:MGI Symbol;Acc:MGI:88392]
ENSMUSG00000073409	5.506	9.314	6.274	36.041	39.89	61.015	7.03133	45.6487	2.6987	1.03447e-18	3.13306e-15	H2-Q6	Up	histocompatibility 2, Q region locus 6 [Source:MGI Symbol;Acc:MGI:95935]
ENSMUSG00000090071	2.01	1.661	1.88	20.588	7.087	8.104	1.85033	11.9263	2.68829	1.68811e-14	1.80449e-11	Cdk5r2	Up	cyclin dependent kinase 5, regulatory subunit 2 [Source:MGI Symbol;Acc:MGI:1330828]
ENSMUSG00000050108	0.18	0.042	0.198	1.424	0.791	0.492	0.14	0.902333	2.68823	0.000946035	0.0145443	Bpifc	Up	BPI fold containing family C [Source:MGI Symbol;Acc:MGI:3026884]
ENSMUSG00000003657	4.701	8.159	9.755	107.469	27.079	11.189	7.53833	48.579	2.68802	0.00184853	0.0238746	Calb2	Up	calbindin 2 [Source:MGI Symbol;Acc:MGI:101914]
ENSMUSG00000041730	0.897	0.418	0.684	4.583	1.18	7.09	0.666333	4.28433	2.68475	7.37739e-07	5.0781e-05	Drgx	Up	dorsal root ganglia homeobox [Source:MGI Symbol;Acc:MGI:2148204]
ENSMUSG00000053693	1.28	1.117	0.882	12.2	3.295	5.477	1.093	6.99067	2.67714	8.67175e-13	6.06089e-10	Mast1	Up	microtubule associated serine/threonine kinase 1 [Source:MGI Symbol;Acc:MGI:1861901]
ENSMUSG00000066438	0.415	0.192	0.608	4.272	0.839	2.592	0.405	2.56767	2.66446	3.76495e-06	0.000183916	Plekhd1	Up	pleckstrin homology domain containing, family D (with coiled-coil domains) member 1 [Source:MGI Symbol;Acc:MGI:3036228]
ENSMUSG00000025401	0.249	0.066	0.094	0.878	0.089	1.604	0.136333	0.857	2.65216	0.00250992	0.029833	Myo1a	Up	myosin IA [Source:MGI Symbol;Acc:MGI:107732]
ENSMUSG00000022132	1.508	1.166	1.3	17.738	5.858	1.344	1.32467	8.31333	2.6498	2.75425e-05	0.000887415	Cldn10	Up	claudin 10 [Source:MGI Symbol;Acc:MGI:1913101]
ENSMUSG00000001901	0.458	0	0.032	1.184	0.182	1.686	0.163333	1.01733	2.6389	0.00440637	0.0452388	Kcnh6	Up	potassium voltage-gated channel, subfamily H (eag-related), member 6 [Source:MGI Symbol;Acc:MGI:2684139]
ENSMUSG00000020436	1.495	1.343	1.485	21.123	2.442	3.248	1.441	8.93767	2.63283	0.00205763	0.0258942	Gabrg2	Up	gamma-aminobutyric acid type A receptor, subunit gamma 2 [Source:MGI Symbol;Acc:MGI:95623]
ENSMUSG00000039179	0.303	0.314	0.417	4.697	1.151	0.543	0.344667	2.13033	2.62781	0.00187106	0.02408	Tekt5	Up	tektin 5 [Source:MGI Symbol;Acc:MGI:1917676]
ENSMUSG00000057715	0.274	0.353	0.265	3.86	0.379	1.242	0.297333	1.827	2.61932	0.000525735	0.00924846	A830018L16Rik	Up	RIKEN cDNA A830018L16 gene [Source:MGI Symbol;Acc:MGI:2444149]
ENSMUSG00000040420	0.401	0.171	0.384	3.901	0.484	1.489	0.318667	1.958	2.61926	0.000194665	0.00427745	Cdh18	Up	cadherin 18 [Source:MGI Symbol;Acc:MGI:1344366]
ENSMUSG00000046854	0.31	0.48	0.128	3.932	0.738	0.966	0.306	1.87867	2.61811	0.00147057	0.0200324	Pip5kl1	Up	phosphatidylinositol-4-phosphate 5-kinase-like 1 [Source:MGI Symbol;Acc:MGI:2448520]
ENSMUSG00000059361	1.429	3.194	3.026	34.042	8.362	4.524	2.54967	15.6427	2.61711	2.0035e-06	0.000113067	Nrsn2	Up	neurensin 2 [Source:MGI Symbol;Acc:MGI:2684969]
ENSMUSG00000023328	3.429	3.849	4.238	49.248	14.055	6.763	3.83867	23.3553	2.60507	2.84583e-08	3.54208e-06	Ache	Up	acetylcholinesterase [Source:MGI Symbol;Acc:MGI:87876]
ENSMUSG00000027350	1.964	3.641	4.272	40.299	11.232	8.376	3.29233	19.969	2.60058	5.42481e-09	8.88105e-07	Chgb	Up	chromogranin B [Source:MGI Symbol;Acc:MGI:88395]
ENSMUSG00000027489	1.772	0.62	0.887	12.058	3.298	4.523	1.093	6.62633	2.59992	1.83438e-08	2.48764e-06	Necab3	Up	N-terminal EF-hand calcium binding protein 3 [Source:MGI Symbol;Acc:MGI:1861721]
ENSMUSG00000070695	0.112	0.124	0.078	1.38	0.28	0.236	0.104667	0.632	2.59412	6.18519e-05	0.00170817	Cntnap5a	Up	contactin associated protein-like 5A [Source:MGI Symbol;Acc:MGI:3643623]
ENSMUSG00000068606	0.388	0.359	0.151	3.787	0.72	0.909	0.299333	1.80533	2.59244	0.000161925	0.00366896	Gm4841	Up	predicted gene 4841 [Source:MGI Symbol;Acc:MGI:3643814]
ENSMUSG00000005716	4.006	7.774	3.078	65.535	13.918	9.855	4.95267	29.7693	2.58755	1.07862e-06	6.95062e-05	Pvalb	Up	parvalbumin [Source:MGI Symbol;Acc:MGI:97821]
ENSMUSG00000010803	0.943	0.897	0.664	9.8	1.292	3.93	0.834667	5.00733	2.58477	6.35344e-07	4.52764e-05	Gabra1	Up	gamma-aminobutyric acid type A receptor subunit alpha 1 [Source:MGI Symbol;Acc:MGI:95613]
ENSMUSG00000058966	2.312	1.716	1.135	19.755	5.339	5.807	1.721	10.3003	2.58137	5.90569e-09	9.41388e-07	Tlcd3b	Up	TLC domain containing 3B [Source:MGI Symbol;Acc:MGI:1916202]
ENSMUSG00000047986	0.648	0.185	0.088	3.301	1.084	1.125	0.307	1.83667	2.58078	0.000187218	0.0041509	Palm3	Up	paralemmin 3 [Source:MGI Symbol;Acc:MGI:1921587]
ENSMUSG00000037259	1.518	1.755	1.396	21.42	3.509	2.819	1.55633	9.24933	2.5712	0.00146518	0.019974	Dzank1	Up	double zinc ribbon and ankyrin repeat domains 1 [Source:MGI Symbol;Acc:MGI:2139080]
ENSMUSG00000030806	6.256	6.623	5.469	79.085	18.551	11.236	6.116	36.2907	2.56894	0.000292202	0.00587378	Stx1b	Up	syntaxin 1B [Source:MGI Symbol;Acc:MGI:1930705]
ENSMUSG00000036198	1.653	0.897	0.869	14.26	3.54	2.434	1.13967	6.74467	2.56514	3.28726e-07	2.58852e-05	Arhgap36	Up	Rho GTPase activating protein 36 [Source:MGI Symbol;Acc:MGI:1922654]
ENSMUSG00000026765	0.535	0.397	0.423	6.077	1.118	0.817	0.451667	2.67067	2.56387	0.000235664	0.00494512	Lypd6b	Up	LY6/PLAUR domain containing 6B [Source:MGI Symbol;Acc:MGI:1919147]
ENSMUSG00000030731	1.364	1.232	0.947	16.338	2.952	1.641	1.181	6.977	2.5626	2.08594e-05	0.000719272	Syt3	Up	synaptotagmin III [Source:MGI Symbol;Acc:MGI:99665]
ENSMUSG00000044067	0.293	0.148	0.275	3.025	0.638	0.563	0.238667	1.40867	2.56126	2.71405e-05	0.000879139	Gpr22	Up	G protein-coupled receptor 22 [Source:MGI Symbol;Acc:MGI:1920260]
ENSMUSG00000090223	11.449	9.019	9.382	115.53	26.643	33.998	9.95	58.7237	2.56117	3.7174e-10	1.03373e-07	Pcp4	Up	Purkinje cell protein 4 [Source:MGI Symbol;Acc:MGI:97509]
ENSMUSG00000060780	0.205	0.27	0.22	2.784	0.604	0.7	0.231667	1.36267	2.55631	0.000379424	0.00721223	Lrrtm1	Up	leucine rich repeat transmembrane neuronal 1 [Source:MGI Symbol;Acc:MGI:2389173]
ENSMUSG00000078591	0.268	0.427	0.404	4.167	1.347	0.92	0.366333	2.14467	2.54952	1.57759e-05	0.00058506	Hs3st4	Up	heparan sulfate (glucosamine) 3-O-sulfotransferase 4 [Source:MGI Symbol;Acc:MGI:1333792]
ENSMUSG00000021219	0.824	0.749	0.832	9.55	2.784	1.728	0.801667	4.68733	2.54769	1.41208e-06	8.5848e-05	Rgs6	Up	regulator of G-protein signaling 6 [Source:MGI Symbol;Acc:MGI:1354730]
ENSMUSG00000001773	1.074	0.668	1.754	15.254	3.029	2.106	1.16533	6.79633	2.54401	4.78018e-06	0.00022399	Folh1	Up	folate hydrolase 1 [Source:MGI Symbol;Acc:MGI:1858193]
ENSMUSG00000038257	0	0.157	0.264	1.745	0.518	0.191	0.140333	0.818	2.54324	0.00388209	0.0414729	Glra3	Up	glycine receptor, alpha 3 subunit [Source:MGI Symbol;Acc:MGI:95749]
ENSMUSG00000052026	0.109	0.37	0.128	2.333	0.729	0.476	0.202333	1.17933	2.54317	0.000665903	0.0111323	Slc6a7	Up	solute carrier family 6 (neurotransmitter transporter, L-proline), member 7 [Source:MGI Symbol;Acc:MGI:2147363]
ENSMUSG00000056596	4.585	2.467	2.143	28.997	6.8	17.693	3.065	17.83	2.54035	9.70773e-10	2.20511e-07	Trnp1	Up	TMF1-regulated nuclear protein 1 [Source:MGI Symbol;Acc:MGI:1916789]
ENSMUSG00000025576	1.981	1.4	0.958	15.033	4.309	5.822	1.44633	8.388	2.53593	8.90729e-11	3.30333e-08	Rbfox3	Up	RNA binding protein, fox-1 homolog (C. elegans) 3 [Source:MGI Symbol;Acc:MGI:106368]
ENSMUSG00000075217	1.292	0.848	0.567	11.007	3.24	1.409	0.902333	5.21867	2.53195	1.15066e-05	0.000456546	Fads2b	Up	fatty acid desaturase 2B [Source:MGI Symbol;Acc:MGI:2687041]
ENSMUSG00000010066	1.131	0.176	0.735	6.225	1.657	3.921	0.680667	3.93433	2.5311	2.69667e-08	3.42684e-06	Cacna2d2	Up	calcium channel, voltage-dependent, alpha 2/delta subunit 2 [Source:MGI Symbol;Acc:MGI:1929813]
ENSMUSG00000023945	1.086	0.263	0.477	7.58	2.211	0.738	0.608667	3.50967	2.52761	2.73479e-05	0.00088271	Slc5a7	Up	solute carrier family 5 (choline transporter), member 7 [Source:MGI Symbol;Acc:MGI:1927126]
ENSMUSG00000054976	0.265	0.25	0.138	2.62	0.672	0.472	0.217667	1.25467	2.52711	4.96376e-05	0.00143862	Nyap2	Up	neuronal tyrosine-phophorylated phosphoinositide 3-kinase adaptor 2 [Source:MGI Symbol;Acc:MGI:2443135]
ENSMUSG00000045174	0.334	0.206	0.245	2.833	0.698	0.992	0.261667	1.50767	2.52652	9.27312e-06	0.000386031	Amer3	Up	APC membrane recruitment 3 [Source:MGI Symbol;Acc:MGI:3026939]
ENSMUSG00000022619	3.323	3.998	2.975	37.929	10.706	10.611	3.432	19.7487	2.52463	1.55036e-12	9.39104e-10	Mapk8ip2	Up	mitogen-activated protein kinase 8 interacting protein 2 [Source:MGI Symbol;Acc:MGI:1926555]
ENSMUSG00000037705	0.139	0.032	0.076	0.426	0.16	0.829	0.0823333	0.471667	2.51822	0.000655126	0.0109926	Tecta	Up	tectorin alpha [Source:MGI Symbol;Acc:MGI:109575]
ENSMUSG00000005994	0.093	0.214	0.041	0.64	0.183	1.17	0.116	0.664333	2.51778	0.00346075	0.0379763	Tyrp1	Up	tyrosinase-related protein 1 [Source:MGI Symbol;Acc:MGI:98881]
ENSMUSG00000034145	0.865	0.753	0.591	6.057	2.007	4.561	0.736333	4.20833	2.51482	2.17922e-09	4.35173e-07	Tmem63c	Up	transmembrane protein 63c [Source:MGI Symbol;Acc:MGI:2444386]
ENSMUSG00000048142	3.147	4.098	3.026	42.779	9.083	6.798	3.42367	19.5533	2.5138	0.000424197	0.00790486	Nat8l	Up	N-acetyltransferase 8-like [Source:MGI Symbol;Acc:MGI:2447776]
ENSMUSG00000031144	17.184	20.782	16.951	197.927	63.216	52.251	18.3057	104.465	2.51265	9.1455e-14	8.3096e-11	Syp	Up	synaptophysin [Source:MGI Symbol;Acc:MGI:98467]
ENSMUSG00000020591	2.393	2.513	1.268	28.546	4.728	1.809	2.058	11.6943	2.50649	0.000115388	0.00280701	Ntsr2	Up	neurotensin receptor 2 [Source:MGI Symbol;Acc:MGI:108018]
ENSMUSG00000021974	0.801	0.109	0.205	4.397	0.958	0.977	0.371667	2.11067	2.50562	0.00173065	0.0226581	Fgf9	Up	fibroblast growth factor 9 [Source:MGI Symbol;Acc:MGI:104723]
ENSMUSG00000039114	8.688	2.031	2.793	32.362	5.983	38.352	4.504	25.5657	2.50493	0.00448675	0.0458309	Nrn1	Up	neuritin 1 [Source:MGI Symbol;Acc:MGI:1915654]
ENSMUSG00000029088	1.945	0.804	1.784	12.984	1.805	10.893	1.511	8.56067	2.50222	1.82645e-06	0.000105877	Kcnip4	Up	Kv channel interacting protein 4 [Source:MGI Symbol;Acc:MGI:1933131]
ENSMUSG00000022577	0.824	1.692	3.974	21.784	8.753	6.081	2.16333	12.206	2.49626	6.10526e-06	0.000272942	Ly6h	Up	lymphocyte antigen 6 family member H [Source:MGI Symbol;Acc:MGI:1346030]
ENSMUSG00000057060	0.53	0.25	0.424	4.65	0.87	1.249	0.401333	2.25633	2.49111	6.86274e-05	0.00185033	Slc35f3	Up	solute carrier family 35, member F3 [Source:MGI Symbol;Acc:MGI:2444426]
ENSMUSG00000011751	0.946	1.19	0.621	10.713	2.918	1.858	0.919	5.163	2.49007	1.37705e-06	8.4826e-05	Sptbn4	Up	spectrin beta, non-erythrocytic 4 [Source:MGI Symbol;Acc:MGI:1890574]
ENSMUSG00000027270	3.066	6.726	5.877	61.773	16.729	9.197	5.223	29.233	2.48465	0.00124285	0.0177138	Lamp5	Up	lysosomal-associated membrane protein family, member 5 [Source:MGI Symbol;Acc:MGI:1923411]
ENSMUSG00000030307	2.25	3.128	3.405	33.213	11.63	4.026	2.92767	16.2897	2.47613	0.000721013	0.0117509	Slc6a11	Up	solute carrier family 6 (neurotransmitter transporter, GABA), member 11 [Source:MGI Symbol;Acc:MGI:95630]
ENSMUSG00000045613	0.259	0.24	0.284	3.278	0.775	0.298	0.261	1.45033	2.47426	0.000217667	0.0046371	Chrm2	Up	cholinergic receptor, muscarinic 2, cardiac [Source:MGI Symbol;Acc:MGI:88397]
ENSMUSG00000028546	2.2	0.9	1.991	16.537	2.289	9.438	1.697	9.42133	2.47294	1.36605e-08	1.93936e-06	Elavl4	Up	ELAV like RNA binding protein 4 [Source:MGI Symbol;Acc:MGI:107427]
ENSMUSG00000022829	0.249	0.142	0.161	2.407	0.51	0.142	0.184	1.01967	2.47032	0.00201374	0.0254653	Stxbp5l	Up	syntaxin binding protein 5-like [Source:MGI Symbol;Acc:MGI:2443815]
ENSMUSG00000057346	2.065	1.242	0.401	9.573	6.833	4.137	1.236	6.84767	2.46993	8.99471e-09	1.3621e-06	Apol9a	Up	apolipoprotein L 9a [Source:MGI Symbol;Acc:MGI:3606001]
ENSMUSG00000029712	0.693	0.65	1.389	8.032	2.908	4.192	0.910667	5.044	2.46957	1.95044e-06	0.000110761	Actl6b	Up	actin-like 6B [Source:MGI Symbol;Acc:MGI:1933548]
ENSMUSG00000058740	0.743	1.058	0.682	7.702	1.678	4.36	0.827667	4.58	2.46823	1.51116e-09	3.15641e-07	Kcnt1	Up	potassium channel, subfamily T, member 1 [Source:MGI Symbol;Acc:MGI:1924627]
ENSMUSG00000024524	3.624	2.553	1.899	27.073	5.61	12.005	2.692	14.896	2.46817	7.9519e-10	1.90134e-07	Gnal	Up	guanine nucleotide binding protein, alpha stimulating, olfactory type [Source:MGI Symbol;Acc:MGI:95774]
ENSMUSG00000008153	5.004	5.844	5.253	58.48	21.145	9.417	5.367	29.6807	2.46734	1.3548e-09	2.93088e-07	Clstn3	Up	calsyntenin 3 [Source:MGI Symbol;Acc:MGI:2178323]
ENSMUSG00000021700	0.992	0.55	0.856	8.662	2.071	2.511	0.799333	4.41467	2.46544	8.67039e-10	2.04621e-07	Rab3c	Up	RAB3C, member RAS oncogene family [Source:MGI Symbol;Acc:MGI:1914545]
ENSMUSG00000100241	1.622	0.752	0.801	11.014	5	1.438	1.05833	5.81733	2.45856	5.02502e-06	0.000233091	Slc18a3	Up	solute carrier family 18 (vesicular monoamine), member 3 [Source:MGI Symbol;Acc:MGI:1101061]
ENSMUSG00000019828	0.212	0.263	0.139	2.533	0.509	0.308	0.204667	1.11667	2.44785	0.000211173	0.00456294	Grm1	Up	glutamate receptor, metabotropic 1 [Source:MGI Symbol;Acc:MGI:1351338]
ENSMUSG00000078307	1.285	1.079	1.147	13.243	3.46	2.352	1.17033	6.35167	2.44022	3.99557e-08	4.65433e-06	AI593442	Up	expressed sequence AI593442 [Source:MGI Symbol;Acc:MGI:2143099]
ENSMUSG00000008489	2.112	1.54	1.841	18.672	2.648	8.409	1.831	9.90967	2.4362	5.6819e-09	9.1373e-07	Elavl2	Up	ELAV like RNA binding protein 1 [Source:MGI Symbol;Acc:MGI:1100887]
ENSMUSG00000039661	3.62	4.382	2.908	30.872	12.103	16.02	3.63667	19.665	2.43494	3.771e-15	4.56844e-12	Dusp26	Up	dual specificity phosphatase 26 [Source:MGI Symbol;Acc:MGI:1914209]
ENSMUSG00000007944	0.606	0.724	0.698	5.456	2.511	2.987	0.676	3.65133	2.43333	1.12011e-07	1.05465e-05	Ttc9b	Up	tetratricopeptide repeat domain 9B [Source:MGI Symbol;Acc:MGI:1920282]
ENSMUSG00000092083	0.258	0.015	0.065	0.905	0.152	0.749	0.112667	0.602	2.4177	0.000119406	0.00289313	Kcnb2	Up	potassium voltage gated channel, Shab-related subfamily, member 2 [Source:MGI Symbol;Acc:MGI:99632]
ENSMUSG00000034855	5.367	5.699	4.024	42.404	21.308	16.831	5.03	26.8477	2.41617	2.49939e-14	2.39047e-11	Cxcl10	Up	C-X-C motif chemokine ligand 10 [Source:MGI Symbol;Acc:MGI:1352450]
ENSMUSG00000031980	3.687	4.016	5.281	48.361	15.085	5.504	4.328	22.9833	2.40882	9.08779e-07	6.04921e-05	Agt	Up	angiotensinogen [Source:MGI Symbol;Acc:MGI:87963]
ENSMUSG00000025189	0.39	0.585	0.606	6.07	1.428	0.893	0.527	2.797	2.40801	1.5068e-05	0.000566088	Cnnm1	Up	cyclin M1 [Source:MGI Symbol;Acc:MGI:1891366]
ENSMUSG00000078235	0.803	0.372	0.353	3.966	1.888	2.226	0.509333	2.69333	2.40271	1.14001e-06	7.24348e-05	Fam43b	Up	family with sequence similarity 43, member B [Source:MGI Symbol;Acc:MGI:3651622]
ENSMUSG00000030834	0.172	0.091	0.065	0.899	0.452	0.376	0.109333	0.575667	2.3965	0.000586177	0.0100113	Abcc6	Up	ATP-binding cassette, sub-family C member 6 [Source:MGI Symbol;Acc:MGI:1351634]
ENSMUSG00000025318	2.234	2.244	1.535	19.513	6.757	5.381	2.00433	10.5503	2.39609	1.13635e-10	3.97111e-08	Jph3	Up	junctophilin 3 [Source:MGI Symbol;Acc:MGI:1891497]
ENSMUSG00000035226	0.173	0.64	0.216	3.311	1.442	0.663	0.343	1.80533	2.39598	5.28989e-05	0.00151383	Rims4	Up	regulating synaptic membrane exocytosis 4 [Source:MGI Symbol;Acc:MGI:2674366]
ENSMUSG00000047495	0.102	0.129	0.12	1.275	0.386	0.183	0.117	0.614667	2.3933	0.0026988	0.0314981	Dlgap2	Up	DLG associated protein 2 [Source:MGI Symbol;Acc:MGI:2443181]
ENSMUSG00000045009	0.259	0.668	0.295	3.971	1.103	1.326	0.407333	2.13333	2.38883	2.85988e-05	0.000913353	Prrt3	Up	proline-rich transmembrane protein 3 [Source:MGI Symbol;Acc:MGI:2444810]
ENSMUSG00000060212	0.568	0.611	0.386	5.509	1.54	1.131	0.521667	2.72667	2.38594	2.49122e-07	2.0862e-05	Pcnx2	Up	pecanex homolog 2 [Source:MGI Symbol;Acc:MGI:2445010]
ENSMUSG00000040258	0.876	1.083	0.769	9.881	3.174	1.115	0.909333	4.72333	2.37692	0.000147366	0.00340705	Nxph4	Up	neurexophilin 4 [Source:MGI Symbol;Acc:MGI:1336197]
ENSMUSG00000004902	2.624	4.212	4.046	40.775	9.951	5.772	3.62733	18.8327	2.37626	1.53981e-06	9.11449e-05	Slc25a18	Up	solute carrier family 25 (mitochondrial carrier), member 18 [Source:MGI Symbol;Acc:MGI:1919053]
ENSMUSG00000039419	0.907	1.971	1.45	15.554	2.057	4.856	1.44267	7.489	2.37604	7.79673e-09	1.2214e-06	Cntnap2	Up	contactin associated protein-like 2 [Source:MGI Symbol;Acc:MGI:1914047]
ENSMUSG00000021313	0.204	0.682	0.635	5.879	0.854	1.128	0.507	2.62033	2.36969	4.0012e-06	0.000193377	Ryr2	Up	ryanodine receptor 2, cardiac [Source:MGI Symbol;Acc:MGI:99685]
ENSMUSG00000027895	1.218	0.896	0.87	10.246	2.565	2.571	0.994667	5.12733	2.36592	1.15327e-07	1.07768e-05	Kcnc4	Up	potassium voltage gated channel, Shaw-related subfamily, member 4 [Source:MGI Symbol;Acc:MGI:96670]
ENSMUSG00000095079	1.822	1.905	1.464	4.064	12.698	9.994	1.73033	8.91867	2.36578	1.44435e-06	8.69095e-05	Igha	Up	immunoglobulin heavy constant alpha [Source:MGI Symbol;Acc:MGI:96444]
ENSMUSG00000047013	0.298	0.464	0.422	4.373	0.965	0.756	0.394667	2.03133	2.36372	1.95585e-05	0.000687461	Fbxo41	Up	F-box protein 41 [Source:MGI Symbol;Acc:MGI:1261912]
ENSMUSG00000032356	3.619	5.772	7.005	60.304	16.866	7.02	5.46533	28.0633	2.3603	0.00250057	0.029758	Rasgrf1	Up	RAS protein-specific guanine nucleotide-releasing factor 1 [Source:MGI Symbol;Acc:MGI:99694]
ENSMUSG00000040276	3.923	4.559	4.215	41.895	11.942	11.333	4.23233	21.7233	2.35972	9.45866e-13	6.13867e-10	Pacsin1	Up	protein kinase C and casein kinase substrate in neurons 1 [Source:MGI Symbol;Acc:MGI:1345181]
ENSMUSG00000063626	0.066	0.194	0.151	1.583	0.299	0.222	0.137	0.701333	2.35592	0.000480845	0.0086514	Unc5d	Up	unc-5 netrin receptor D [Source:MGI Symbol;Acc:MGI:2389364]
ENSMUSG00000034098	0.599	0.244	0.414	4.234	1.125	1.056	0.419	2.13833	2.35146	0.000122264	0.00293888	Fstl5	Up	follistatin-like 5 [Source:MGI Symbol;Acc:MGI:2442179]
ENSMUSG00000046321	0.161	0.249	0.236	1.856	0.269	1.171	0.215333	1.09867	2.35111	0.00399174	0.0423735	Hs3st2	Up	heparan sulfate (glucosamine) 3-O-sulfotransferase 2 [Source:MGI Symbol;Acc:MGI:1333802]
ENSMUSG00000069355	1.637	0.206	0.638	9.694	1.751	1.208	0.827	4.21767	2.35049	0.00109012	0.0162109	Speer1c	Up	spermatogenesis associated glutamate (E)-rich protein 1C [Source:MGI Symbol;Acc:MGI:3643407]
ENSMUSG00000036564	34.294	27.538	22.935	262.723	67.718	101.81	28.2557	144.084	2.35029	1.88751e-13	1.55908e-10	Ndrg4	Up	N-myc downstream regulated gene 4 [Source:MGI Symbol;Acc:MGI:2384590]
ENSMUSG00000079017	194.173	155.963	95.325	555.506	829.869	884.311	148.487	756.562	2.34912	7.34645e-18	1.66875e-14	Ifi27l2a	Up	interferon, alpha-inducible protein 27 like 2A [Source:MGI Symbol;Acc:MGI:1924183]
ENSMUSG00000020684	3.798	4.907	4.355	46.066	12.791	7.617	4.35333	22.158	2.34764	7.69285e-08	7.68846e-06	Rasl10b	Up	RAS-like, family 10, member B [Source:MGI Symbol;Acc:MGI:2685575]
ENSMUSG00000022416	0.05	0.216	0.309	2.174	0.429	0.318	0.191667	0.973667	2.34483	2.92973e-05	0.000932383	Cacna1i	Up	calcium channel, voltage-dependent, alpha 1I subunit [Source:MGI Symbol;Acc:MGI:2178051]
ENSMUSG00000029757	3.891	3.069	3.836	32.069	10.337	12.373	3.59867	18.2597	2.34313	3.331e-12	1.83427e-09	Dync1i1	Up	dynein cytoplasmic 1 intermediate chain 1 [Source:MGI Symbol;Acc:MGI:107743]
ENSMUSG00000027438	4.292	2.806	3.175	36.719	7.392	8.004	3.42433	17.3717	2.34284	3.0105e-08	3.72155e-06	Napb	Up	N-ethylmaleimide sensitive fusion protein attachment protein beta [Source:MGI Symbol;Acc:MGI:104562]
ENSMUSG00000026247	3.285	5.026	4.391	40.255	17.659	6.278	4.234	21.3973	2.33734	1.8284e-08	2.48764e-06	Ecel1	Up	endothelin converting enzyme-like 1 [Source:MGI Symbol;Acc:MGI:1343461]
ENSMUSG00000040797	1.187	2	1.887	17.725	5.236	2.68	1.69133	8.547	2.33726	0.000898299	0.0139045	Iqsec3	Up	IQ motif and Sec7 domain 3 [Source:MGI Symbol;Acc:MGI:2677208]
ENSMUSG00000047507	0.327	0.636	0.968	4.622	3.536	1.548	0.643667	3.23533	2.32953	1.30466e-06	8.09156e-05	Baiap3	Up	BAI1-associated protein 3 [Source:MGI Symbol;Acc:MGI:2685783]
ENSMUSG00000024064	0.286	0.19	0.752	2.945	0.728	2.474	0.409333	2.049	2.32357	0.000279972	0.00569089	Galnt14	Up	polypeptide N-acetylgalactosaminyltransferase 14 [Source:MGI Symbol;Acc:MGI:1918935]
ENSMUSG00000044349	1.147	1.237	0.971	11.908	3.069	1.775	1.11833	5.584	2.31995	8.74839e-07	5.8447e-05	Snhg11	Up	small nucleolar RNA host gene 11 [Source:MGI Symbol;Acc:MGI:2441845]
ENSMUSG00000062168	1.281	0.32	0.108	3.269	0.618	4.594	0.569667	2.827	2.31108	0.0012346	0.0176737	Ppef1	Up	protein phosphatase with EF hand calcium-binding domain 1 [Source:MGI Symbol;Acc:MGI:1097157]
ENSMUSG00000063954	2.898	1.846	3.643	20.496	3.921	17.13	2.79567	13.849	2.30852	7.40863e-05	0.00195967	H2ac19	Up	H2A clustered histone 19 [Source:MGI Symbol;Acc:MGI:2448283]
ENSMUSG00000021721	0.082	0.253	0.144	1.347	0.365	0.655	0.159667	0.789	2.30496	0.000849653	0.0133563	Htr1a	Up	5-hydroxytryptamine (serotonin) receptor 1A [Source:MGI Symbol;Acc:MGI:96273]
ENSMUSG00000037979	8.607	5.935	4.141	55.329	16.226	20.736	6.22767	30.7637	2.30446	1.94619e-12	1.10519e-09	Ccdc92	Up	coiled-coil domain containing 92 [Source:MGI Symbol;Acc:MGI:106485]
ENSMUSG00000046999	0.332	0.22	0.292	1.921	0.278	1.967	0.281333	1.38867	2.30335	0.00147611	0.0200627	1110032F04Rik	Up	RIKEN cDNA 1110032F04 gene [Source:MGI Symbol;Acc:MGI:1915975]
ENSMUSG00000056553	1.537	2.121	1.954	16.999	6.373	4.303	1.87067	9.225	2.302	5.00255e-09	8.26421e-07	Ptprn2	Up	protein tyrosine phosphatase receptor type N polypeptide 2 [Source:MGI Symbol;Acc:MGI:107418]
ENSMUSG00000033597	1.211	1.269	1.175	11.485	2.477	4.054	1.21833	6.00533	2.30134	9.52323e-09	1.43022e-06	Caskin1	Up	CASK interacting protein 1 [Source:MGI Symbol;Acc:MGI:2442952]
ENSMUSG00000003469	0.948	1.837	1.589	14.728	4.792	2.006	1.458	7.17533	2.29906	9.80486e-06	0.000400391	Phyhip	Up	phytanoyl-CoA hydroxylase interacting protein [Source:MGI Symbol;Acc:MGI:1860417]
ENSMUSG00000027581	33.163	32.531	24.01	261.501	85.683	92.317	29.9013	146.5	2.29262	1.15133e-13	9.96282e-11	Stmn3	Up	stathmin-like 3 [Source:MGI Symbol;Acc:MGI:1277137]
ENSMUSG00000028488	3.467	4.981	2.93	40.416	8.527	6.588	3.79267	18.5103	2.28705	0.00166711	0.0220165	Sh3gl2	Up	SH3-domain GRB2-like 2 [Source:MGI Symbol;Acc:MGI:700009]
ENSMUSG00000026787	0.681	1.164	1.178	10.874	2.492	1.332	1.00767	4.89933	2.28157	1.85743e-05	0.000661231	Gad2	Up	glutamic acid decarboxylase 2 [Source:MGI Symbol;Acc:MGI:95634]
ENSMUSG00000004231	0.179	0.278	0.278	2.586	0.479	0.499	0.245	1.188	2.27768	0.000333479	0.00652312	Pax2	Up	paired box 2 [Source:MGI Symbol;Acc:MGI:97486]
ENSMUSG00000044288	0.488	0.742	0.466	6.069	1.215	0.906	0.565333	2.73	2.27173	3.92501e-05	0.00117119	Cnr1	Up	cannabinoid receptor 1 [Source:MGI Symbol;Acc:MGI:104615]
ENSMUSG00000001420	1.11	0.769	0.322	2.416	0.315	7.897	0.733667	3.54267	2.27164	0.000269953	0.00551238	Tmem79	Up	transmembrane protein 79 [Source:MGI Symbol;Acc:MGI:1919163]
ENSMUSG00000061080	3.922	4.724	5.226	45.695	13.358	7.814	4.624	22.289	2.26912	3.14342e-06	0.000160456	Lsamp	Up	limbic system-associated membrane protein [Source:MGI Symbol;Acc:MGI:1261760]
ENSMUSG00000062783	0.495	0.25	0.987	3.91	0.602	3.814	0.577333	2.77533	2.26518	0.000428528	0.00792618	Csprs	Up	component of Sp100-rs [Source:NCBI gene (formerly Entrezgene);Acc:114564]
ENSMUSG00000048349	0.66	0.332	0.29	2.473	0.184	3.502	0.427333	2.053	2.2643	0.000642334	0.0108279	Pou4f1	Up	POU domain, class 4, transcription factor 1 [Source:MGI Symbol;Acc:MGI:102525]
ENSMUSG00000032564	0.393	0.202	0.378	3.112	0.39	1.171	0.324333	1.55767	2.26384	0.00025824	0.00533872	Cpne4	Up	copine IV [Source:MGI Symbol;Acc:MGI:1921270]
ENSMUSG00000062296	0.116	0.366	0.194	2.216	0.525	0.457	0.225333	1.066	2.24207	0.000103368	0.00258378	Trank1	Up	tetratricopeptide repeat and ankyrin repeat containing 1 [Source:MGI Symbol;Acc:MGI:1341834]
ENSMUSG00000009216	0.496	1.149	0.69	7.471	2.626	0.932	0.778333	3.67633	2.23981	0.00013988	0.00326723	Fam163b	Up	family with sequence similarity 163, member B [Source:MGI Symbol;Acc:MGI:1926106]
ENSMUSG00000028004	0.478	0.067	0.129	1.518	0.622	1.043	0.224667	1.061	2.23957	0.000834987	0.0131828	Npy2r	Up	neuropeptide Y receptor Y2 [Source:MGI Symbol;Acc:MGI:108418]
ENSMUSG00000027419	1.45	1.968	2.137	14.401	4.654	7.157	1.85167	8.73733	2.23837	7.87253e-11	2.98041e-08	Pcsk2	Up	proprotein convertase subtilisin/kexin type 2 [Source:MGI Symbol;Acc:MGI:97512]
ENSMUSG00000056812	0.887	0.545	0.635	6.061	1.42	2.259	0.689	3.24667	2.23638	3.92748e-09	6.99707e-07	St8sia3	Up	ST8 alpha-N-acetyl-neuraminide alpha-2,8-sialyltransferase 3 [Source:MGI Symbol;Acc:MGI:106019]
ENSMUSG00000090231	17.37	19.149	6.458	46.742	65.058	90.09	14.3257	67.2967	2.23193	4.48567e-10	1.19873e-07	Cfb	Up	complement factor B [Source:MGI Symbol;Acc:MGI:105975]
ENSMUSG00000044433	1.374	0.861	0.806	7.358	3.612	3.291	1.01367	4.75367	2.22946	1.51125e-06	8.98396e-05	Camsap3	Up	calmodulin regulated spectrin-associated protein family, member 3 [Source:MGI Symbol;Acc:MGI:1916947]
ENSMUSG00000029608	7.634	10.462	7.426	79.517	18.988	21.175	8.50733	39.8933	2.22937	3.65009e-09	6.69993e-07	Rph3a	Up	rabphilin 3A [Source:MGI Symbol;Acc:MGI:102788]
ENSMUSG00000069814	0.458	0.51	0.563	4.317	1.354	1.489	0.510333	2.38667	2.22549	2.86436e-06	0.000150873	Ccdc92b	Up	coiled-coil domain containing 92B [Source:MGI Symbol;Acc:MGI:3588240]
ENSMUSG00000024403	9.234	12.915	9.488	100.296	27.947	19.676	10.5457	49.3063	2.22512	1.50018e-08	2.11328e-06	Atp6v1g2	Up	ATPase, H+ transporting, lysosomal V1 subunit G2 [Source:MGI Symbol;Acc:MGI:1913487]
ENSMUSG00000061911	0.696	0.674	0.904	6.695	1.823	2.055	0.758	3.52433	2.21708	3.23052e-07	2.56569e-05	Myt1l	Up	myelin transcription factor 1-like [Source:MGI Symbol;Acc:MGI:1100511]
ENSMUSG00000026173	2.443	2.78	2.926	25.633	7.141	5.047	2.71633	12.607	2.21449	2.87483e-07	2.34266e-05	Plcd4	Up	phospholipase C, delta 4 [Source:MGI Symbol;Acc:MGI:107469]
ENSMUSG00000070866	0.185	0.147	0.302	1.804	0.642	0.481	0.211333	0.975667	2.20687	0.000502511	0.00897017	Zfp804a	Up	zinc finger protein 804A [Source:MGI Symbol;Acc:MGI:2442949]
ENSMUSG00000047786	5.019	2.283	2.371	21.465	3.677	19.422	3.22433	14.8547	2.20384	0.00197776	0.0251152	Lix1	Up	limb and CNS expressed 1 [Source:MGI Symbol;Acc:MGI:1913893]
ENSMUSG00000064225	0.468	0.488	0.578	4.375	1.259	1.425	0.511333	2.353	2.20217	1.06663e-07	1.00952e-05	Paqr9	Up	progestin and adipoQ receptor family member IX [Source:MGI Symbol;Acc:MGI:1922802]
ENSMUSG00000031772	0.479	0.234	0.244	2.691	0.591	1.119	0.319	1.467	2.20124	6.52354e-05	0.00178264	Cntnap4	Up	contactin associated protein-like 4 [Source:MGI Symbol;Acc:MGI:2183572]
ENSMUSG00000059256	0.888	1.058	0.334	1.629	3.5	5.352	0.76	3.49367	2.20067	0.00087731	0.0137081	Gzmd	Up	granzyme D [Source:MGI Symbol;Acc:MGI:109255]
ENSMUSG00000052981	4.254	3.307	4.136	35.013	11.088	7.618	3.899	17.9063	2.19929	2.18248e-08	2.85324e-06	Ube2ql1	Up	ubiquitin-conjugating enzyme E2Q family-like 1 [Source:MGI Symbol;Acc:MGI:1924230]
ENSMUSG00000082229	3.523	4.231	3.224	33.865	7.798	8.588	3.65933	16.7503	2.19454	1.15644e-07	1.07768e-05	Nap1l2	Up	nucleosome assembly protein 1-like 2 [Source:MGI Symbol;Acc:MGI:106654]
ENSMUSG00000059742	0.158	0.146	0.123	1.024	0.202	0.719	0.142333	0.648333	2.18746	8.24246e-05	0.00213669	Kcnh7	Up	potassium voltage-gated channel, subfamily H (eag-related), member 7 [Source:MGI Symbol;Acc:MGI:2159566]
ENSMUSG00000023064	71.064	31.8	23.569	204.749	94.803	275.515	42.1443	191.689	2.18536	0.000246674	0.00511124	Sncg	Up	synuclein, gamma [Source:MGI Symbol;Acc:MGI:1298397]
ENSMUSG00000021364	0.966	1.045	0.979	10.597	1.912	1.078	0.996667	4.529	2.18401	0.000200807	0.00438755	Elovl2	Up	ELOVL fatty acid elongase 2 [Source:MGI Symbol;Acc:MGI:1858960]
ENSMUSG00000045967	1.075	1.454	1.333	11.338	3.294	2.915	1.28733	5.849	2.1838	2.79149e-08	3.49841e-06	Gpr158	Up	G protein-coupled receptor 158 [Source:MGI Symbol;Acc:MGI:2441697]
ENSMUSG00000005045	0.665	1.078	0.984	8.364	2.099	1.905	0.909	4.12267	2.18123	4.67468e-07	3.48149e-05	Chd5	Up	chromodomain helicase DNA binding protein 5 [Source:MGI Symbol;Acc:MGI:3036258]
ENSMUSG00000037202	0.258	0.871	0.304	1.611	1.718	3.163	0.477667	2.164	2.17962	0.000162275	0.00367231	Prf1	Up	perforin 1 (pore forming protein) [Source:MGI Symbol;Acc:MGI:97551]
ENSMUSG00000042388	0.787	1.197	1.372	8.673	3.78	2.748	1.11867	5.067	2.17935	7.40757e-08	7.52013e-06	Dlgap3	Up	DLG associated protein 3 [Source:MGI Symbol;Acc:MGI:3039563]
ENSMUSG00000028037	5.506	3.623	1.993	26.03	11.559	12.777	3.70733	16.7887	2.17903	2.15182e-11	9.09368e-09	Ifi44	Up	interferon-induced protein 44 [Source:MGI Symbol;Acc:MGI:2443016]
ENSMUSG00000040035	6.6	6.822	8.389	62.776	21.487	14.251	7.27033	32.838	2.17527	7.67408e-10	1.85938e-07	Disp2	Up	dispatched RND transporter family member 2 [Source:MGI Symbol;Acc:MGI:2388733]
ENSMUSG00000076490	1.031	0.923	0.313	1.693	3.617	4.912	0.755667	3.40733	2.17282	0.00235643	0.0285473	Trbc1	Up	T cell receptor beta, constant region 1 [Source:MGI Symbol;Acc:MGI:4439726]
ENSMUSG00000034949	1.023	0.643	0.737	6.652	2.374	1.78	0.801	3.602	2.16892	2.3423e-05	0.000781451	Zfr2	Up	zinc finger RNA binding protein 2 [Source:MGI Symbol;Acc:MGI:2143792]
ENSMUSG00000018470	1.735	2.01	1.185	16.422	3.545	2.173	1.64333	7.38	2.167	5.73662e-05	0.00161872	Kcnab3	Up	potassium voltage-gated channel, shaker-related subfamily, beta member 3 [Source:MGI Symbol;Acc:MGI:1336208]
ENSMUSG00000017943	2.431	4.534	3.165	28.168	8.276	8.993	3.37667	15.1457	2.16523	5.88851e-08	6.25766e-06	Gdap1l1	Up	ganglioside-induced differentiation-associated protein 1-like 1 [Source:MGI Symbol;Acc:MGI:2385163]
ENSMUSG00000096847	0.859	0.854	1.051	7.889	2.336	2.17	0.921333	4.13167	2.16493	2.93923e-07	2.38445e-05	Tmem151b	Up	transmembrane protein 151B [Source:MGI Symbol;Acc:MGI:2685169]
ENSMUSG00000051262	0.605	0.111	0.258	2.312	0.858	1.184	0.324667	1.45133	2.16035	0.00363376	0.0393755	Nat8f3	Up	N-acetyltransferase 8 (GCN5-related) family member 3 [Source:MGI Symbol;Acc:MGI:2136449]
ENSMUSG00000017390	51.307	55.879	55.626	503.259	138.346	86.033	54.2707	242.546	2.16001	0.000748114	0.012108	Aldoc	Up	aldolase C, fructose-bisphosphate [Source:MGI Symbol;Acc:MGI:101863]
ENSMUSG00000040740	0.458	0.552	0.804	4.932	2.144	0.999	0.604667	2.69167	2.15429	0.000122132	0.00293888	Slc25a34	Up	solute carrier family 25, member 34 [Source:MGI Symbol;Acc:MGI:2686215]
ENSMUSG00000035849	1.309	0.59	1.145	8.739	2.296	2.483	1.01467	4.506	2.15084	2.04121e-05	0.000707879	Krt222	Up	keratin 222 [Source:MGI Symbol;Acc:MGI:2442728]
ENSMUSG00000070687	0.442	0.156	0.144	1.649	0.506	1.118	0.247333	1.091	2.14112	0.00297608	0.0339707	Htr1d	Up	5-hydroxytryptamine (serotonin) receptor 1D [Source:MGI Symbol;Acc:MGI:96276]
ENSMUSG00000035615	1.17	0.613	1.859	9.363	2.146	4.547	1.214	5.352	2.14031	7.2073e-09	1.13888e-06	Frmpd1	Up	FERM and PDZ domain containing 1 [Source:MGI Symbol;Acc:MGI:2446274]
ENSMUSG00000021675	1.662	0.906	1.288	5.746	2.861	8.39	1.28533	5.66567	2.1401	4.43946e-07	3.37548e-05	F2rl2	Up	coagulation factor II thrombin receptor like 2 [Source:MGI Symbol;Acc:MGI:1298208]
ENSMUSG00000016346	1.474	2.256	1.292	14.872	3.393	3.799	1.674	7.35467	2.13536	1.01095e-07	9.87684e-06	Kcnq2	Up	potassium voltage-gated channel, subfamily Q, member 2 [Source:MGI Symbol;Acc:MGI:1309503]
ENSMUSG00000030098	0.294	0.588	0.33	3.202	1.213	0.903	0.404	1.77267	2.13349	0.000276424	0.00562505	Grip2	Up	glutamate receptor interacting protein 2 [Source:MGI Symbol;Acc:MGI:2681173]
ENSMUSG00000026610	0.456	0.434	0.426	4.552	0.47	0.73	0.438667	1.91733	2.1279	0.000953385	0.0146202	Esrrg	Up	estrogen-related receptor gamma [Source:MGI Symbol;Acc:MGI:1347056]
ENSMUSG00000045731	0.567	0.999	0.946	5.734	3.426	1.81	0.837333	3.65667	2.12666	8.17721e-05	0.00212806	Pnoc	Up	prepronociceptin [Source:MGI Symbol;Acc:MGI:105308]
ENSMUSG00000040424	1.009	0.426	0.46	4.583	2.57	1.115	0.631667	2.756	2.12534	2.63054e-05	0.000858527	Hipk4	Up	homeodomain interacting protein kinase 4 [Source:MGI Symbol;Acc:MGI:2685008]
ENSMUSG00000024268	2.257	2.929	3.76	23.142	8.563	7.185	2.982	12.9633	2.12008	2.03645e-07	1.79643e-05	Celf4	Up	CUGBP, Elav-like family member 4 [Source:MGI Symbol;Acc:MGI:1932407]
ENSMUSG00000038793	0.076	0.63	1.127	1.862	3.029	3.074	0.611	2.655	2.11947	0.00150002	0.0202759	Lefty1	Up	left right determination factor 1 [Source:MGI Symbol;Acc:MGI:107405]
ENSMUSG00000025876	0.543	0.77	0.449	5.292	1.844	0.511	0.587333	2.549	2.11768	0.000432509	0.00797924	Unc5a	Up	unc-5 netrin receptor A [Source:MGI Symbol;Acc:MGI:894682]
ENSMUSG00000029544	6.046	7.785	5.273	48.604	16.403	17.884	6.368	27.6303	2.11734	3.60996e-09	6.6939e-07	Cabp1	Up	calcium binding protein 1 [Source:MGI Symbol;Acc:MGI:1352750]
ENSMUSG00000061578	0.075	0.138	0.196	1.114	0.273	0.386	0.136333	0.591	2.11602	0.000173478	0.00388233	Ksr2	Up	kinase suppressor of ras 2 [Source:MGI Symbol;Acc:MGI:3610315]
ENSMUSG00000001334	2.036	3.898	1.982	21.818	7.364	5.119	2.63867	11.4337	2.11541	6.37885e-07	4.52798e-05	Fndc5	Up	fibronectin type III domain containing 5 [Source:MGI Symbol;Acc:MGI:1917614]
ENSMUSG00000026458	0.609	1.143	0.946	7.478	1.806	2.398	0.899333	3.894	2.11433	7.56925e-07	5.19051e-05	Ppfia4	Up	protein tyrosine phosphatase, receptor type, f polypeptide (PTPRF), interacting protein (liprin), alpha 4 [Source:MGI Symbol;Acc:MGI:1915757]
ENSMUSG00000058297	19.078	16.167	14.966	124.359	36.892	56.039	16.737	72.43	2.11355	9.1069e-13	6.12928e-10	Spock2	Up	sparc/osteonectin, cwcv and kazal-like domains proteoglycan 2 [Source:MGI Symbol;Acc:MGI:1891351]
ENSMUSG00000039323	33.003	32.943	44.206	315.448	100.32	59.477	36.7173	158.415	2.10918	3.97073e-08	4.65433e-06	Igfbp2	Up	insulin-like growth factor binding protein 2 [Source:MGI Symbol;Acc:MGI:96437]
ENSMUSG00000105096	0.995	0.75	0.824	5.129	2.286	3.666	0.856333	3.69367	2.10881	9.63847e-09	1.43408e-06	Gbp10	Up	guanylate-binding protein 10 [Source:MGI Symbol;Acc:MGI:4359647]
ENSMUSG00000023236	27.339	32.282	28.98	241.215	72.45	67.301	29.5337	126.989	2.10427	6.78548e-10	1.71258e-07	Scg5	Up	secretogranin V [Source:MGI Symbol;Acc:MGI:98289]
ENSMUSG00000071489	1.113	0.356	0.505	1.213	3.08	4.159	0.658	2.81733	2.09817	4.08287e-05	0.00121232	Ptgdr	Up	prostaglandin D receptor [Source:MGI Symbol;Acc:MGI:102966]
ENSMUSG00000039809	1.723	1.183	1.587	10.862	2.294	6.06	1.49767	6.40533	2.09656	1.59311e-07	1.45478e-05	Gabbr2	Up	gamma-aminobutyric acid type B receptor subunit 2 [Source:MGI Symbol;Acc:MGI:2386030]
ENSMUSG00000037653	0.556	0.357	0.676	3.169	1.001	2.616	0.529667	2.262	2.09444	6.30032e-05	0.00173469	Kctd8	Up	potassium channel tetramerisation domain containing 8 [Source:MGI Symbol;Acc:MGI:2443804]
ENSMUSG00000046500	0.838	0.259	0.785	2.979	0.373	4.671	0.627333	2.67433	2.09188	0.00241477	0.0289836	Tafa4	Up	TAFA chemokine like family member 4 [Source:MGI Symbol;Acc:MGI:2444563]
ENSMUSG00000025468	2.112	2.674	2.595	20.492	7.909	3.064	2.46033	10.4883	2.09186	9.40726e-05	0.0023976	Caly	Up	calcyon neuron-specific vesicular protein [Source:MGI Symbol;Acc:MGI:1915816]
ENSMUSG00000041608	1.24	1.182	1.244	8.782	2.369	4.457	1.222	5.20267	2.09001	1.58332e-07	1.45313e-05	Entpd3	Up	ectonucleoside triphosphate diphosphohydrolase 3 [Source:MGI Symbol;Acc:MGI:1321386]
ENSMUSG00000024292	0.963	0.705	1.004	6.131	2.477	2.75	0.890667	3.786	2.08772	6.55261e-06	0.000288315	Cyp4f14	Up	cytochrome P450, family 4, subfamily f, polypeptide 14 [Source:MGI Symbol;Acc:MGI:1927669]
ENSMUSG00000020333	6.177	6.135	7.817	61.379	14.22	9.632	6.70967	28.4103	2.0821	0.00305719	0.0346139	Acsl6	Up	acyl-CoA synthetase long-chain family member 6 [Source:MGI Symbol;Acc:MGI:894291]
ENSMUSG00000067149	0.527	0.814	0.771	1.301	4.184	3.448	0.704	2.97767	2.08053	0.000509632	0.00904399	Jchain	Up	immunoglobulin joining chain [Source:MGI Symbol;Acc:MGI:96493]
ENSMUSG00000058153	2.229	2.56	1.494	17.764	6.254	2.521	2.09433	8.84633	2.07859	2.27426e-06	0.000124481	Sez6l	Up	seizure related 6 homolog like [Source:MGI Symbol;Acc:MGI:1935121]
ENSMUSG00000061576	6.196	4.931	5.508	43.794	12.401	13.791	5.545	23.3287	2.07284	9.34595e-10	2.14981e-07	Dpp6	Up	dipeptidylpeptidase 6 [Source:MGI Symbol;Acc:MGI:94921]
ENSMUSG00000026576	43.575	35.546	29.841	313.945	74.012	69.978	36.3207	152.645	2.07132	0.000505143	0.00898066	Atp1b1	Up	ATPase, Na+/K+ transporting, beta 1 polypeptide [Source:MGI Symbol;Acc:MGI:88108]
ENSMUSG00000021983	2.44	0.959	0.763	11.784	1.515	4.186	1.38733	5.82833	2.07077	4.59144e-07	3.44775e-05	Atp8a2	Up	ATPase, aminophospholipid transporter-like, class I, type 8A, member 2 [Source:MGI Symbol;Acc:MGI:1354710]
ENSMUSG00000041986	1.362	1.784	2.556	15.86	5.063	2.971	1.90067	7.96467	2.06711	1.53523e-05	0.000571683	Elmod1	Up	ELMO/CED-12 domain containing 1 [Source:MGI Symbol;Acc:MGI:3583900]
ENSMUSG00000023011	7.981	9.996	10.109	80.907	24.851	11.828	9.362	39.1953	2.06579	0.00255553	0.0302732	Faim2	Up	Fas apoptotic inhibitory molecule 2 [Source:MGI Symbol;Acc:MGI:1919643]
ENSMUSG00000057455	2.191	3.728	2.557	24.719	5.988	4.563	2.82533	11.7567	2.05699	2.18032e-05	0.000743354	Rit2	Up	Ras-like without CAAX 2 [Source:MGI Symbol;Acc:MGI:108054]
ENSMUSG00000037217	9.315	9.812	8.834	71.577	22.154	22.409	9.32033	38.7133	2.05438	2.97331e-10	8.79128e-08	Syn1	Up	synapsin I [Source:MGI Symbol;Acc:MGI:98460]
ENSMUSG00000020836	0.765	0.495	0.647	5.346	1.48	1.091	0.635667	2.639	2.05365	0.000771533	0.0123964	Coro6	Up	coronin 6 [Source:MGI Symbol;Acc:MGI:2183448]
ENSMUSG00000026825	17.197	17.711	14.893	130.465	39.484	36.606	16.6003	68.8517	2.05228	3.80616e-09	6.91655e-07	Dnm1	Up	dynamin 1 [Source:MGI Symbol;Acc:MGI:107384]
ENSMUSG00000033707	1.156	0.607	0.791	6.495	3.134	0.963	0.851333	3.53067	2.05214	0.000451329	0.00822622	Lrrc24	Up	leucine rich repeat containing 24 [Source:MGI Symbol;Acc:MGI:3605040]
ENSMUSG00000038738	0.724	1.012	0.854	7.18	2.203	1.358	0.863333	3.58033	2.0521	6.65345e-07	4.6863e-05	Shank1	Up	SH3 and multiple ankyrin repeat domains 1 [Source:MGI Symbol;Acc:MGI:3613677]
ENSMUSG00000028963	6.139	1.686	2.595	20.209	16.534	6.448	3.47333	14.397	2.05138	6.31553e-05	0.00173625	Uts2	Up	urotensin 2 [Source:MGI Symbol;Acc:MGI:1346329]
ENSMUSG00000026822	23.661	14.869	5.048	102.455	41.903	36.163	14.526	60.1737	2.05049	3.31841e-07	2.59923e-05	Lcn2	Up	lipocalin 2 [Source:MGI Symbol;Acc:MGI:96757]
ENSMUSG00000024479	1.907	1.076	0.837	6.675	1.178	7.93	1.27333	5.261	2.04673	6.4683e-05	0.00177501	Mal2	Up	mal, T cell differentiation protein 2 [Source:MGI Symbol;Acc:MGI:2146021]
ENSMUSG00000039838	1.445	1.64	2.291	13.236	4.804	4.17	1.792	7.40333	2.0466	2.3786e-07	2.01981e-05	Slc45a1	Up	solute carrier family 45, member 1 [Source:MGI Symbol;Acc:MGI:2653235]
ENSMUSG00000041771	0.266	0.694	0.559	4.185	1.529	0.552	0.506333	2.08867	2.04442	0.00156716	0.0208655	Slc24a4	Up	solute carrier family 24 (sodium/potassium/calcium exchanger), member 4 [Source:MGI Symbol;Acc:MGI:2447362]
ENSMUSG00000050822	1.447	1.341	1.656	11.413	3.373	3.508	1.48133	6.098	2.04144	1.47623e-06	8.82433e-05	Slc29a4	Up	solute carrier family 29 (nucleoside transporters), member 4 [Source:MGI Symbol;Acc:MGI:2385330]
ENSMUSG00000074264	1.846	0.576	1.171	7.922	3.809	3.033	1.19767	4.92133	2.03882	3.05756e-05	0.000964617	Amy1	Up	amylase 1, salivary [Source:MGI Symbol;Acc:MGI:88019]
ENSMUSG00000036815	1.461	0.716	1.114	8.748	1.706	3.033	1.097	4.49567	2.03497	1.21928e-05	0.000475465	Dpp10	Up	dipeptidylpeptidase 10 [Source:MGI Symbol;Acc:MGI:2442409]
ENSMUSG00000028071	0.164	0.167	0.378	0.771	0.485	1.647	0.236333	0.967667	2.03369	0.00259422	0.0306118	Sh2d2a	Up	SH2 domain containing 2A [Source:MGI Symbol;Acc:MGI:1351596]
ENSMUSG00000039632	0.167	0.524	0.342	2.228	0.745	1.255	0.344333	1.40933	2.03314	0.00301552	0.0343369	Odad3	Up	outer dynein arm docking complex subunit 3 [Source:MGI Symbol;Acc:MGI:1924859]
ENSMUSG00000027612	0.295	0.956	1.002	5.05	1.714	2.42	0.751	3.06133	2.02728	2.28374e-05	0.00076852	Mmp24	Up	matrix metallopeptidase 24 [Source:MGI Symbol;Acc:MGI:1341867]
ENSMUSG00000040164	0.451	0.376	0.436	2.673	1.093	1.378	0.421	1.71467	2.02604	0.000142165	0.00331207	Kcns1	Up	K+ voltage-gated channel, subfamily S, 1 [Source:MGI Symbol;Acc:MGI:1197019]
ENSMUSG00000044835	0.645	1.129	0.838	7.097	1.487	2.012	0.870667	3.532	2.02029	0.000132436	0.00314591	Ankrd45	Up	ankyrin repeat domain 45 [Source:MGI Symbol;Acc:MGI:1921094]
ENSMUSG00000027457	5.329	3.513	3.281	33.975	8.763	6.44	4.041	16.3927	2.02027	2.18229e-07	1.88778e-05	Snph	Up	syntaphilin [Source:MGI Symbol;Acc:MGI:2139270]
ENSMUSG00000047361	1.493	1.894	1.935	15.403	3.842	2.26	1.774	7.16833	2.01463	0.00168472	0.0221685	Gm973	Up	predicted gene 973 [Source:MGI Symbol;Acc:MGI:2685819]
ENSMUSG00000026163	1.106	0.996	0.899	8.861	2.108	1.154	1.00033	4.041	2.01423	4.76336e-05	0.00139164	Sphkap	Up	SPHK1 interactor, AKAP domain containing [Source:MGI Symbol;Acc:MGI:1924879]
ENSMUSG00000027520	0.101	0.14	0.168	1.167	0.279	0.206	0.136333	0.550667	2.01404	0.00115701	0.0168741	Zdbf2	Up	zinc finger, DBF-type containing 2 [Source:MGI Symbol;Acc:MGI:1921134]
ENSMUSG00000062393	0.171	0.26	0.082	1.431	0.195	0.442	0.171	0.689333	2.01121	0.00271792	0.0316197	Dgkk	Up	diacylglycerol kinase kappa [Source:MGI Symbol;Acc:MGI:3580254]
ENSMUSG00000091002	0.381	0.575	0.461	3.627	1.076	1.006	0.472333	1.903	2.0104	0.000793281	0.0126452	Tcerg1l	Up	transcription elongation regulator 1-like [Source:MGI Symbol;Acc:MGI:1917821]
ENSMUSG00000060550	10.82	18.427	10.117	37.932	49.154	70.352	13.1213	52.4793	1.99984	3.37877e-10	9.5936e-08	H2-Q7	Up	histocompatibility 2, Q region locus 7 [Source:MGI Symbol;Acc:MGI:95936]
ENSMUSG00000043857	0.316	0.985	0.479	3.688	2.422	1.003	0.593333	2.371	1.99858	0.000158432	0.00361686	Mgat5b	Up	mannoside acetylglucosaminyltransferase 5, isoenzyme B [Source:MGI Symbol;Acc:MGI:3606200]
ENSMUSG00000046613	0.248	0.906	0.508	4.465	1.242	0.884	0.554	2.197	1.98758	0.000180978	0.00402538	Vwa5b2	Up	von Willebrand factor A domain containing 5B2 [Source:MGI Symbol;Acc:MGI:2681859]
ENSMUSG00000050640	2.935	3.241	1.776	19.049	5.14	7.286	2.65067	10.4917	1.98482	4.66848e-07	3.48149e-05	Tmem150c	Up	transmembrane protein 150C [Source:MGI Symbol;Acc:MGI:3041258]
ENSMUSG00000041708	0.787	1.494	1.316	9.888	2.881	1.444	1.199	4.73767	1.98235	0.000165615	0.00373395	Mpped1	Up	metallophosphoesterase domain containing 1 [Source:MGI Symbol;Acc:MGI:106316]
ENSMUSG00000037509	4.759	5.945	6.427	45.931	13.771	7.778	5.71033	22.4933	1.97785	1.40151e-05	0.000532681	Arhgef4	Up	Rho guanine nucleotide exchange factor 4 [Source:MGI Symbol;Acc:MGI:2442507]
ENSMUSG00000079362	4.106	3.581	2.858	18.552	9.618	13.326	3.515	13.832	1.97641	9.52487e-16	1.44238e-12	Gm43302	Up	predicted gene 43302 [Source:MGI Symbol;Acc:MGI:5663439]
ENSMUSG00000007021	5.042	5.654	4.591	34.367	10.875	14.848	5.09567	20.03	1.97482	2.82906e-09	5.52792e-07	Syngr3	Up	synaptogyrin 3 [Source:MGI Symbol;Acc:MGI:1341881]
ENSMUSG00000041670	0.961	0.543	0.453	4.888	0.901	1.903	0.652333	2.564	1.97472	6.81399e-06	0.000295522	Rims1	Up	regulating synaptic membrane exocytosis 1 [Source:MGI Symbol;Acc:MGI:2152971]
ENSMUSG00000076609	4.368	7.245	8.478	10.9	41.512	26.417	6.697	26.2763	1.97218	2.09311e-05	0.00072038	Igkc	Up	immunoglobulin kappa constant [Source:MGI Symbol;Acc:MGI:96495]
ENSMUSG00000073555	0.925	0.643	0.406	3.882	1.701	2.119	0.658	2.56733	1.96411	2.1478e-05	0.000735024	Iigp1c	Up	interferon inducible GTPase 1C [Source:MGI Symbol;Acc:MGI:3644953]
ENSMUSG00000059991	1.592	1.475	1.44	7.336	2.661	7.541	1.50233	5.846	1.96024	9.16757e-07	6.08004e-05	Nptx2	Up	neuronal pentraxin 2 [Source:MGI Symbol;Acc:MGI:1858209]
ENSMUSG00000056158	1.262	1.715	1.402	10.849	3.254	2.896	1.45967	5.66633	1.95678	4.07624e-06	0.000196481	Car10	Up	carbonic anhydrase 10 [Source:MGI Symbol;Acc:MGI:1919855]
ENSMUSG00000009394	5.836	5.964	5.719	42.727	13.94	11.071	5.83967	22.5793	1.95104	2.6746e-08	3.42273e-06	Syn2	Up	synapsin II [Source:MGI Symbol;Acc:MGI:103020]
ENSMUSG00000017167	2.833	2.792	2.132	20.075	5.507	4.366	2.58567	9.98267	1.94889	8.14386e-07	5.56354e-05	Cntnap1	Up	contactin associated protein-like 1 [Source:MGI Symbol;Acc:MGI:1858201]
ENSMUSG00000029875	1.233	1.028	1.768	9.658	3.057	2.839	1.343	5.18467	1.94879	1.00577e-05	0.000407964	Ccdc184	Up	coiled-coil domain containing 184 [Source:MGI Symbol;Acc:MGI:2146066]
ENSMUSG00000031937	1.352	1.196	1.187	7.099	1.643	5.674	1.245	4.80533	1.94849	4.99378e-05	0.00144502	Vstm5	Up	V-set and transmembrane domain containing 5 [Source:MGI Symbol;Acc:MGI:1916387]
ENSMUSG00000043463	1.014	1.025	0.702	6.921	1.798	1.855	0.913667	3.52467	1.94775	2.26772e-05	0.000764546	Rab9b	Up	RAB9B, member RAS oncogene family [Source:MGI Symbol;Acc:MGI:2442454]
ENSMUSG00000022468	0.557	0.373	0.295	2.753	1.118	0.828	0.408333	1.56633	1.93957	0.00117538	0.0170327	Endou	Up	endonuclease, polyU-specific [Source:MGI Symbol;Acc:MGI:97746]
ENSMUSG00000041827	8.468	6.757	4.333	19.221	27.043	28.467	6.51933	24.9103	1.93395	5.25338e-12	2.58012e-09	Oasl1	Up	2'-5' oligoadenylate synthetase-like 1 [Source:MGI Symbol;Acc:MGI:2180849]
ENSMUSG00000055430	18.729	19.426	18.402	133.346	44.665	38.058	18.8523	72.023	1.93371	4.46421e-09	7.68906e-07	Nap1l5	Up	nucleosome assembly protein 1-like 5 [Source:MGI Symbol;Acc:MGI:1923555]
ENSMUSG00000016349	34.629	33.345	34.73	234.369	76.192	81.779	34.2347	130.78	1.93361	1.27182e-10	4.36067e-08	Eef1a2	Up	eukaryotic translation elongation factor 1 alpha 2 [Source:MGI Symbol;Acc:MGI:1096317]
ENSMUSG00000067889	3.144	3.224	2.601	20.422	7.109	6.635	2.98967	11.3887	1.92954	2.99945e-10	8.79128e-08	Sptbn2	Up	spectrin beta, non-erythrocytic 2 [Source:MGI Symbol;Acc:MGI:1313261]
ENSMUSG00000021750	9.217	8.058	5.3	55.107	22.87	7.983	7.525	28.6533	1.92894	3.60866e-06	0.000177234	Fam107a	Up	family with sequence similarity 107, member A [Source:MGI Symbol;Acc:MGI:3041256]
ENSMUSG00000034416	0.132	0.292	0.262	1.014	0.886	0.711	0.228667	0.870333	1.92832	1.931e-05	0.00068136	Pkd1l2	Up	polycystic kidney disease 1 like 2 [Source:MGI Symbol;Acc:MGI:2664668]
ENSMUSG00000029055	0.153	0.213	0.405	1.656	0.788	0.49	0.257	0.978	1.92807	0.000190316	0.00420732	Plch2	Up	phospholipase C, eta 2 [Source:MGI Symbol;Acc:MGI:2443078]
ENSMUSG00000040794	0.759	1.23	1.915	9.178	4.359	1.31	1.30133	4.949	1.92715	0.00219013	0.0270558	C1qtnf4	Up	C1q and tumor necrosis factor related protein 4 [Source:MGI Symbol;Acc:MGI:1914695]
ENSMUSG00000048834	2.143	1.73	1.585	15.258	2.786	2.707	1.81933	6.917	1.92674	0.00015725	0.00359893	Vstm2a	Up	V-set and transmembrane domain containing 2A [Source:MGI Symbol;Acc:MGI:2384826]
ENSMUSG00000049265	0.706	0.803	0.704	4.977	1.771	1.657	0.737667	2.80167	1.92524	9.51216e-06	0.000391074	Kcnk3	Up	potassium channel, subfamily K, member 3 [Source:MGI Symbol;Acc:MGI:1100509]
ENSMUSG00000040536	1.38	1.038	0.791	7.117	1.803	3.265	1.06967	4.06167	1.92491	1.58746e-06	9.36601e-05	Necab1	Up	N-terminal EF-hand calcium binding protein 1 [Source:MGI Symbol;Acc:MGI:1916602]
ENSMUSG00000042761	1.229	1.946	0.816	10.299	3.737	1.091	1.33033	5.04233	1.9223	0.00122092	0.0175527	Mrap2	Up	melanocortin 2 receptor accessory protein 2 [Source:MGI Symbol;Acc:MGI:3609239]
ENSMUSG00000024901	0.925	0.716	0.601	5.792	1.318	1.385	0.747333	2.83167	1.92183	0.00011351	0.00277991	Peli3	Up	pellino 3 [Source:MGI Symbol;Acc:MGI:1924963]
ENSMUSG00000040543	0.455	0.457	0.573	3.041	1.716	0.868	0.495	1.875	1.92139	3.45738e-06	0.000171333	Pitpnm3	Up	PITPNM family member 3 [Source:MGI Symbol;Acc:MGI:2685726]
ENSMUSG00000050359	35.663	36.568	22.783	197.099	118.734	43.371	31.6713	119.735	1.91859	3.03536e-08	3.72693e-06	Sprr1a	Up	small proline-rich protein 1A [Source:MGI Symbol;Acc:MGI:106660]
ENSMUSG00000032532	3.009	3.117	1.243	14.442	9.026	4.248	2.45633	9.23867	1.91118	0.00021377	0.00459301	Cck	Up	cholecystokinin [Source:MGI Symbol;Acc:MGI:88297]
ENSMUSG00000016179	0.793	1.286	0.783	6.703	2.236	1.801	0.954	3.58	1.9079	0.000124521	0.00298128	Camk1g	Up	calcium/calmodulin-dependent protein kinase I gamma [Source:MGI Symbol;Acc:MGI:2388073]
ENSMUSG00000030107	18.441	14.205	4.608	57.027	42.317	40.16	12.418	46.5013	1.90484	3.48502e-09	6.52884e-07	Usp18	Up	ubiquitin specific peptidase 18 [Source:MGI Symbol;Acc:MGI:1344364]
ENSMUSG00000051527	0.344	0.595	0.332	3.78	0.556	0.422	0.423667	1.586	1.90439	0.000661193	0.0110757	Usp29	Up	ubiquitin specific peptidase 29 [Source:MGI Symbol;Acc:MGI:1888998]
ENSMUSG00000066392	1.119	1.585	1.949	12.45	2.732	2.177	1.551	5.78633	1.89945	7.78784e-05	0.00205102	Nrxn3	Up	neurexin III [Source:MGI Symbol;Acc:MGI:1096389]
ENSMUSG00000035692	43.15	37.088	12.831	128.197	117.078	101.603	31.023	115.626	1.89806	4.18584e-10	1.1353e-07	Isg15	Up	ISG15 ubiquitin-like modifier [Source:MGI Symbol;Acc:MGI:1855694]
ENSMUSG00000031970	1.718	1.066	1.067	7.886	2.959	3.508	1.28367	4.78433	1.89805	2.14716e-05	0.000735024	Dbndd1	Up	dysbindin domain containing 1 [Source:MGI Symbol;Acc:MGI:1919435]
ENSMUSG00000042078	2.254	2.244	2.971	17.136	5.428	5.194	2.48967	9.25267	1.89392	1.88778e-08	2.54109e-06	Svop	Up	SV2 related protein [Source:MGI Symbol;Acc:MGI:1915916]
ENSMUSG00000039278	14.167	15.973	18.95	101.692	46.809	33.828	16.3633	60.7763	1.89304	1.024e-10	3.66286e-08	Pcsk1n	Up	proprotein convertase subtilisin/kexin type 1 inhibitor [Source:MGI Symbol;Acc:MGI:1353431]
ENSMUSG00000025735	1.206	0.745	1.472	8.704	2.923	1.075	1.141	4.234	1.89172	0.00108857	0.0162109	Rhbdl1	Up	rhomboid like 1 [Source:MGI Symbol;Acc:MGI:2384891]
ENSMUSG00000044499	0.569	0.218	0.941	3.569	1.581	1.262	0.576	2.13733	1.89167	0.000781178	0.0124741	Hs3st5	Up	heparan sulfate (glucosamine) 3-O-sulfotransferase 5 [Source:MGI Symbol;Acc:MGI:2441996]
ENSMUSG00000004187	1.468	1.937	1.987	13.456	3.612	2.916	1.79733	6.66133	1.88995	2.85231e-05	0.000912539	Kifc2	Up	kinesin family member C2 [Source:MGI Symbol;Acc:MGI:109187]
ENSMUSG00000032338	0.28	0.111	0.105	1.086	0.368	0.378	0.165333	0.610667	1.88501	0.00275375	0.0318937	Hcn4	Up	hyperpolarization-activated, cyclic nucleotide-gated K+ 4 [Source:MGI Symbol;Acc:MGI:1298209]
ENSMUSG00000032259	0.336	0.445	0.422	2.751	1.124	0.559	0.401	1.478	1.88197	0.00392392	0.0418459	Drd2	Up	dopamine receptor D2 [Source:MGI Symbol;Acc:MGI:94924]
ENSMUSG00000028838	0.563	0.577	0.781	4.011	1.834	1.229	0.640333	2.358	1.88067	2.3355e-05	0.000781451	Extl1	Up	exostosin-like glycosyltransferase 1 [Source:MGI Symbol;Acc:MGI:1888742]
ENSMUSG00000006930	5.631	6.865	7.02	41.114	20.392	10.285	6.50533	23.9303	1.87915	4.04363e-08	4.68031e-06	Hap1	Up	huntingtin-associated protein 1 [Source:MGI Symbol;Acc:MGI:1261831]
ENSMUSG00000022523	8.4	4.631	3.138	35.292	8.07	15.842	5.38967	19.7347	1.87246	3.23406e-08	3.89201e-06	Fgf12	Up	fibroblast growth factor 12 [Source:MGI Symbol;Acc:MGI:109183]
ENSMUSG00000020151	0.897	0.862	0.781	4.162	1.727	3.354	0.846667	3.081	1.86353	4.10606e-06	0.000197395	Ptprr	Up	protein tyrosine phosphatase receptor type R [Source:MGI Symbol;Acc:MGI:109559]
ENSMUSG00000020704	2.133	1.573	2.789	11.946	4.747	6.839	2.165	7.844	1.85722	3.21113e-08	3.89017e-06	Asic2	Up	acid-sensing ion channel 2 [Source:MGI Symbol;Acc:MGI:1100867]
ENSMUSG00000030110	16.225	11.308	7.907	62.439	25.138	40.793	11.8133	42.79	1.85686	2.66928e-11	1.10241e-08	Ret	Up	ret proto-oncogene [Source:MGI Symbol;Acc:MGI:97902]
ENSMUSG00000031026	0.344	0.196	0.29	2.031	0.552	0.423	0.276667	1.002	1.85666	0.000833311	0.0131678	Trim66	Up	tripartite motif-containing 66 [Source:MGI Symbol;Acc:MGI:2152406]
ENSMUSG00000023036	9.782	15.07	42.475	70.546	105.868	67.037	22.4423	81.1503	1.85437	0.00324238	0.0361698	Pcdhgc4	Up	protocadherin gamma subfamily C, 4 [Source:MGI Symbol;Acc:MGI:1935203]
ENSMUSG00000060882	0.641	0.924	1.084	6.448	1.985	1.139	0.883	3.19067	1.85337	0.000170228	0.00382371	Kcnd2	Up	potassium voltage-gated channel, Shal-related family, member 2 [Source:MGI Symbol;Acc:MGI:102663]
ENSMUSG00000078234	0.846	0.682	0.564	5.168	1.427	0.946	0.697333	2.51367	1.84987	6.48582e-05	0.00177501	Klhdc7a	Up	kelch domain containing 7A [Source:MGI Symbol;Acc:MGI:2444612]
ENSMUSG00000045007	2.563	2.009	1.803	13.661	4.55	4.761	2.125	7.65733	1.84938	5.79362e-06	0.000261245	Tubg2	Up	tubulin, gamma 2 [Source:MGI Symbol;Acc:MGI:2144208]
ENSMUSG00000004558	65.782	68.21	62.077	462.941	148.828	94.559	65.3563	235.443	1.84898	1.50113e-07	1.38469e-05	Ndrg2	Up	N-myc downstream regulated gene 2 [Source:MGI Symbol;Acc:MGI:1352498]
ENSMUSG00000057897	4.499	4.854	5.278	34.916	11.49	6.272	4.877	17.5593	1.84817	4.5419e-06	0.000215478	Camk2b	Up	calcium/calmodulin-dependent protein kinase II, beta [Source:MGI Symbol;Acc:MGI:88257]
ENSMUSG00000075602	161.165	173.547	149.49	552.805	587.123	602.061	161.401	580.663	1.84705	3.4737e-23	2.10413e-19	Ly6a	Up	lymphocyte antigen 6 family member A [Source:MGI Symbol;Acc:MGI:107527]
ENSMUSG00000020847	0.445	1.031	1.128	2.884	3.284	3.173	0.868	3.11367	1.84285	0.00133867	0.0186982	Rph3al	Up	rabphilin 3A-like (without C2 domains) [Source:MGI Symbol;Acc:MGI:1923492]
ENSMUSG00000073433	5.099	4.614	5.517	28.447	13.773	12.412	5.07667	18.2107	1.84283	1.76009e-08	2.44155e-06	Arhgdig	Up	Rho GDP dissociation inhibitor gamma [Source:MGI Symbol;Acc:MGI:108430]
ENSMUSG00000034825	3.504	3.044	1.785	17.818	4.158	7.895	2.77767	9.957	1.84184	1.2288e-05	0.000478152	Nrip3	Up	nuclear receptor interacting protein 3 [Source:MGI Symbol;Acc:MGI:1925843]
ENSMUSG00000071234	0.485	0.996	0.776	4.947	1.973	1.163	0.752333	2.69433	1.84048	0.000748252	0.012108	Syndig1l	Up	synapse differentiation inducing 1 like [Source:MGI Symbol;Acc:MGI:2685107]
ENSMUSG00000022208	2.098	1.742	1.627	11.002	3.485	5.035	1.82233	6.50733	1.83628	7.7003e-08	7.68846e-06	Jph4	Up	junctophilin 4 [Source:MGI Symbol;Acc:MGI:2443113]
ENSMUSG00000103255	0.156	0.157	0.135	0.752	0.33	0.515	0.149333	0.532333	1.83379	0.00295592	0.0338043	Pcdhac1	Up	protocadherin alpha subfamily C, 1 [Source:MGI Symbol;Acc:MGI:1891442]
ENSMUSG00000031409	1.006	1.695	1.736	10.99	2.877	1.946	1.479	5.271	1.83345	0.00378769	0.0406315	Tceal6	Up	transcription elongation factor A (SII)-like 6 [Source:MGI Symbol;Acc:MGI:1923939]
ENSMUSG00000031543	3.443	2.214	3.337	18.288	5.15	8.612	2.998	10.6833	1.83329	2.86951e-09	5.54732e-07	Ank1	Up	ankyrin 1, erythroid [Source:MGI Symbol;Acc:MGI:88024]
ENSMUSG00000025777	3.376	2.383	2.385	20.191	3.441	5.361	2.71467	9.66433	1.8319	3.84047e-05	0.00115163	Gdap1	Up	ganglioside-induced differentiation-associated-protein 1 [Source:MGI Symbol;Acc:MGI:1338002]
ENSMUSG00000022584	61.519	51.392	69.991	126.441	144.524	179.535	60.967	150.167	1.82832	1.01808e-07	9.89337e-06	Ly6c2	Up	lymphocyte antigen 6 family memberC2 [Source:MGI Symbol;Acc:MGI:3712069]
ENSMUSG00000049176	0.185	0.243	0.433	2.089	0.295	0.669	0.287	1.01767	1.82614	0.00116174	0.016916	Frmpd4	Up	FERM and PDZ domain containing 4 [Source:MGI Symbol;Acc:MGI:3042378]
ENSMUSG00000041020	10.91	7.614	4.87	50.386	12.386	20.161	7.798	27.6443	1.82581	2.97045e-07	2.39907e-05	Map7d2	Up	MAP7 domain containing 2 [Source:MGI Symbol;Acc:MGI:1917474]
ENSMUSG00000032297	0.752	0.873	0.437	3.628	1.085	2.595	0.687333	2.436	1.82543	5.17462e-05	0.00149022	Celf6	Up	CUGBP, Elav-like family member 6 [Source:MGI Symbol;Acc:MGI:1923433]
ENSMUSG00000098470	0.495	0.434	0.304	1.212	1.123	2.031	0.411	1.45533	1.82414	0.00113816	0.0167247	C1rb	Up	complement component 1, r subcomponent B [Source:MGI Symbol;Acc:MGI:3779804]
ENSMUSG00000061232	258.62	210.893	321.876	732.311	1010.42	1059.42	263.796	934.049	1.82407	3.63668e-12	1.9437e-09	H2-K1	Up	histocompatibility 2, K1, K region [Source:MGI Symbol;Acc:MGI:95904]
ENSMUSG00000062488	11.805	7.571	4.027	44.785	17.926	20.103	7.801	27.6047	1.82318	6.20263e-08	6.51528e-06	Ifit3b	Up	interferon-induced protein with tetratricopeptide repeats 3B [Source:MGI Symbol;Acc:MGI:3698419]
ENSMUSG00000031840	27.794	23.715	22.308	157.583	53.909	49.04	24.6057	86.844	1.81944	3.88889e-09	6.99692e-07	Rab3a	Up	RAB3A, member RAS oncogene family [Source:MGI Symbol;Acc:MGI:97843]
ENSMUSG00000079071	0.605	0.489	0.801	1.55	2.726	2.41	0.631667	2.22867	1.81895	1.61635e-05	0.000594581	Slc28a2b	Up	solute carrier family 28 member 2b [Source:MGI Symbol;Acc:MGI:3702173]
ENSMUSG00000034459	11.237	7.128	3.275	34.705	17.205	24.346	7.21333	25.4187	1.81715	2.13075e-08	2.8058e-06	Ifit1	Up	interferon-induced protein with tetratricopeptide repeats 1 [Source:MGI Symbol;Acc:MGI:99450]
ENSMUSG00000035964	7.465	10.112	14.476	66.035	24.824	22.073	10.6843	37.644	1.81692	3.64932e-07	2.80997e-05	Tmem59l	Up	transmembrane protein 59-like [Source:MGI Symbol;Acc:MGI:1915187]
ENSMUSG00000074968	1.678	0.812	1.233	6.432	1.281	5.399	1.241	4.37067	1.81635	2.44693e-05	0.000811415	Ano3	Up	anoctamin 3 [Source:MGI Symbol;Acc:MGI:3613666]
ENSMUSG00000022099	8.119	6.736	7.361	43.543	16.056	18.567	7.40533	26.0553	1.81494	2.37901e-10	7.32734e-08	Dmtn	Up	dematin actin binding protein [Source:MGI Symbol;Acc:MGI:99670]
ENSMUSG00000057058	0.258	0.713	0.804	2.43	2.523	1.283	0.591667	2.07867	1.8128	0.00198398	0.0251657	Skap1	Up	src family associated phosphoprotein 1 [Source:MGI Symbol;Acc:MGI:1925723]
ENSMUSG00000032181	32.264	26.956	27.371	163.791	34.465	105.583	28.8637	101.28	1.81102	1.76218e-07	1.56972e-05	Scg3	Up	secretogranin III [Source:MGI Symbol;Acc:MGI:103032]
ENSMUSG00000021708	1.938	2.307	2.102	15.311	4.319	2.635	2.11567	7.42167	1.81063	1.62819e-05	0.000597726	Rasgrf2	Up	RAS protein-specific guanine nucleotide-releasing factor 2 [Source:MGI Symbol;Acc:MGI:109137]
ENSMUSG00000027577	0.456	0.844	0.917	5.266	1.478	1.013	0.739	2.58567	1.80689	0.000651649	0.0109443	Chrna4	Up	cholinergic receptor, nicotinic, alpha polypeptide 4 [Source:MGI Symbol;Acc:MGI:87888]
ENSMUSG00000034059	1.606	1.782	2.05	11.533	3.358	4.098	1.81267	6.32967	1.80402	6.77041e-05	0.00183356	Ypel4	Up	yippee like 4 [Source:MGI Symbol;Acc:MGI:3605071]
ENSMUSG00000048978	3.303	5	5.606	31.956	7.5	9.087	4.63633	16.181	1.80324	1.98203e-05	0.00069128	Nrsn1	Up	neurensin 1 [Source:MGI Symbol;Acc:MGI:894662]
ENSMUSG00000054855	3.89	5.506	4.951	31.325	10.732	7.989	4.78233	16.682	1.80251	4.22928e-06	0.000202248	Rnd1	Up	Rho family GTPase 1 [Source:MGI Symbol;Acc:MGI:2444878]
ENSMUSG00000030350	0.629	0.624	0.591	3.548	1.013	1.861	0.614667	2.14067	1.80018	0.000399441	0.00752972	Prmt8	Up	protein arginine N-methyltransferase 8 [Source:MGI Symbol;Acc:MGI:3043083]
ENSMUSG00000048483	0.671	0.641	0.873	5.339	1.361	0.899	0.728333	2.533	1.79818	0.000340645	0.00662054	Zdhhc22	Up	zinc finger, DHHC-type containing 22 [Source:MGI Symbol;Acc:MGI:2685108]
ENSMUSG00000022658	26.337	31.814	27.712	184.231	66.376	47.99	28.621	99.5323	1.79809	6.38491e-08	6.66819e-06	Tagln3	Up	transgelin 3 [Source:MGI Symbol;Acc:MGI:1926784]
ENSMUSG00000025537	1.085	0.804	1.776	8.711	2.885	1.134	1.22167	4.24333	1.79635	6.21954e-05	0.00171505	Phkg1	Up	phosphorylase kinase gamma 1 [Source:MGI Symbol;Acc:MGI:97579]
ENSMUSG00000026831	0.753	2.653	1.984	8.778	6.296	3.615	1.79667	6.22967	1.79383	0.00111099	0.0164539	Pierce1	Up	piercer of microtubule wall 1 [Source:MGI Symbol;Acc:MGI:1916577]
ENSMUSG00000021647	3.521	4.516	4.692	25.131	7.189	11.594	4.243	14.638	1.78656	9.46977e-06	0.000390215	Cartpt	Up	CART prepropeptide [Source:MGI Symbol;Acc:MGI:1351330]
ENSMUSG00000025855	27.521	27.642	26.303	160.98	62.547	56.94	27.1553	93.489	1.78356	2.28876e-10	7.27923e-08	Prkar1b	Up	protein kinase, cAMP dependent regulatory, type I beta [Source:MGI Symbol;Acc:MGI:97759]
ENSMUSG00000054162	3.594	4.222	5.335	29.184	9.118	6.828	4.38367	15.0433	1.77891	4.91578e-06	0.000229639	Spock3	Up	sparc/osteonectin, cwcv and kazal-like domains proteoglycan 3 [Source:MGI Symbol;Acc:MGI:1920152]
ENSMUSG00000038094	1.167	2.14	2.103	12.96	3.255	2.323	1.80333	6.17933	1.77679	0.000434591	0.00798523	Atp13a4	Up	ATPase type 13A4 [Source:MGI Symbol;Acc:MGI:1924456]
ENSMUSG00000024743	3.216	2.964	1.943	14.005	4.138	9.674	2.70767	9.27233	1.77588	2.31277e-07	1.97313e-05	Syt7	Up	synaptotagmin VII [Source:MGI Symbol;Acc:MGI:1859545]
ENSMUSG00000037989	1.615	1.21	1.388	8.303	3.959	2.151	1.40433	4.80433	1.77445	1.18731e-05	0.000463994	Wnk2	Up	WNK lysine deficient protein kinase 2 [Source:MGI Symbol;Acc:MGI:1922857]
ENSMUSG00000030209	0.071	0.123	0.062	0.517	0.225	0.133	0.0853333	0.291667	1.77314	0.000582538	0.00997727	Grin2b	Up	glutamate receptor, ionotropic, NMDA2B (epsilon 2) [Source:MGI Symbol;Acc:MGI:95821]
ENSMUSG00000021991	2.167	1.62	1.192	10.844	2.573	3.596	1.65967	5.671	1.77271	2.92899e-06	0.000152947	Cacna2d3	Up	calcium channel, voltage-dependent, alpha2/delta subunit 3 [Source:MGI Symbol;Acc:MGI:1338890]
ENSMUSG00000062444	6.588	5.719	5.632	35.106	14.184	11.966	5.97967	20.4187	1.77175	1.31019e-09	2.86853e-07	Ap3b2	Up	adaptor-related protein complex 3, beta 2 subunit [Source:MGI Symbol;Acc:MGI:1100869]
ENSMUSG00000061762	12.65	8.216	9.21	48.863	13.986	39.604	10.0253	34.151	1.76828	1.09787e-06	7.00015e-05	Tac1	Up	tachykinin 1 [Source:MGI Symbol;Acc:MGI:98474]
ENSMUSG00000070532	2.822	4.038	3.102	22.17	7.185	4.56	3.32067	11.305	1.76742	6.73668e-05	0.00182988	Ccdc190	Up	coiled-coil domain containing 190 [Source:MGI Symbol;Acc:MGI:1925715]
ENSMUSG00000049583	0.669	1.174	0.921	6.02	2.235	1.15	0.921333	3.135	1.76667	1.5528e-05	0.000577046	Grm5	Up	glutamate receptor, metabotropic 5 [Source:MGI Symbol;Acc:MGI:1351342]
ENSMUSG00000028785	2.468	3.893	4.028	18.735	11.323	5.273	3.463	11.777	1.76588	1.43261e-05	0.000542363	Hpca	Up	hippocalcin [Source:MGI Symbol;Acc:MGI:1336200]
ENSMUSG00000017639	6.273	6.314	5.132	40.264	12.027	7.828	5.90633	20.0397	1.76252	3.59609e-06	0.000177095	Rab11fip4	Up	RAB11 family interacting protein 4 (class II) [Source:MGI Symbol;Acc:MGI:2442920]
ENSMUSG00000068227	1.169	0.972	0.847	2.679	2.487	4.972	0.996	3.37933	1.76252	1.66889e-07	1.51635e-05	Il2rb	Up	interleukin 2 receptor, beta chain [Source:MGI Symbol;Acc:MGI:96550]
ENSMUSG00000072966	3.65	4.164	4.014	27.215	8.647	4.189	3.94267	13.3503	1.75963	4.22791e-05	0.0012513	Gprasp2	Up	G protein-coupled receptor associated sorting protein 2 [Source:MGI Symbol;Acc:MGI:2442071]
ENSMUSG00000025723	5.915	3.537	4.131	12.573	4.404	28.993	4.52767	15.3233	1.75889	0.000710201	0.0116373	Nmb	Up	neuromedin B [Source:MGI Symbol;Acc:MGI:1915289]
ENSMUSG00000004366	4.411	8.962	14.894	53.785	28.361	13.447	9.42233	31.8643	1.75779	0.000139052	0.0032595	Sst	Up	somatostatin [Source:MGI Symbol;Acc:MGI:98326]
ENSMUSG00000035864	3.351	3.201	3.485	17.389	6.227	10.304	3.34567	11.3067	1.75681	2.068e-09	4.17552e-07	Syt1	Up	synaptotagmin I [Source:MGI Symbol;Acc:MGI:99667]
ENSMUSG00000030235	5.073	8.404	5.886	36.606	14.75	14.035	6.45433	21.797	1.75579	9.20317e-08	9.1388e-06	Slco1c1	Up	solute carrier organic anion transporter family, member 1c1 [Source:MGI Symbol;Acc:MGI:1889679]
ENSMUSG00000040412	0.374	0.141	0.339	1.404	0.754	0.716	0.284667	0.958	1.75075	0.000499191	0.00891966	Elapor1	Up	endosome-lysosome associated apoptosis and autophagy regulator 1 [Source:MGI Symbol;Acc:MGI:1923930]
ENSMUSG00000021263	0.985	0.608	0.918	4.436	2.344	1.645	0.837	2.80833	1.74641	0.0023865	0.0287673	Degs2	Up	delta 4-desaturase, sphingolipid 2 [Source:MGI Symbol;Acc:MGI:1917309]
ENSMUSG00000060314	0.445	0.677	1.054	4.581	1.286	1.409	0.725333	2.42533	1.74147	0.000625744	0.0105875	Zfp941	Up	zinc finger protein 941 [Source:MGI Symbol;Acc:MGI:3039601]
ENSMUSG00000001520	1.809	2.206	1.135	11.343	3.229	2.631	1.71667	5.73433	1.74002	0.000179928	0.00400693	Nrip2	Up	nuclear receptor interacting protein 2 [Source:MGI Symbol;Acc:MGI:1891884]
ENSMUSG00000021922	0.708	0.683	0.473	1.258	1.484	3.468	0.621333	2.07	1.73619	0.000452891	0.00823817	Itih4	Up	inter alpha-trypsin inhibitor, heavy chain 4 [Source:MGI Symbol;Acc:MGI:109536]
ENSMUSG00000042816	1.312	0.896	0.788	5.727	2.193	2.058	0.998667	3.326	1.73571	0.00047388	0.00855149	Gpr151	Up	G protein-coupled receptor 151 [Source:MGI Symbol;Acc:MGI:2441887]
ENSMUSG00000051029	1.515	2.678	8.069	25.144	10.49	5.14	4.08733	13.5913	1.73346	0.000155614	0.003575	Serpinb1b	Up	serine (or cysteine) peptidase inhibitor, clade B, member 1b [Source:MGI Symbol;Acc:MGI:2445361]
ENSMUSG00000030683	24.518	20.52	32.893	131.93	75.379	51.009	25.977	86.106	1.72888	1.40153e-10	4.7164e-08	Sez6l2	Up	seizure related 6 homolog like 2 [Source:MGI Symbol;Acc:MGI:2385295]
ENSMUSG00000046699	0.395	0.297	0.771	3.435	0.484	0.913	0.487667	1.61067	1.72369	0.000504924	0.00898066	Slitrk4	Up	SLIT and NTRK-like family, member 4 [Source:MGI Symbol;Acc:MGI:2442509]
ENSMUSG00000051146	9.285	8.781	8.568	52.122	17.502	18.327	8.878	29.317	1.72343	2.22377e-07	1.90615e-05	Camk2n2	Up	calcium/calmodulin-dependent protein kinase II inhibitor 2 [Source:MGI Symbol;Acc:MGI:1920297]
ENSMUSG00000041423	2.143	4.093	4.584	18.265	9.672	7.711	3.60667	11.8827	1.72012	2.35488e-06	0.000128507	Paqr6	Up	progestin and adipoQ receptor family member VI [Source:MGI Symbol;Acc:MGI:1916207]
ENSMUSG00000033849	0.316	0.293	0.324	1.678	0.771	0.622	0.311	1.02367	1.71876	2.49579e-05	0.000824609	B3galt2	Up	UDP-Gal:betaGlcNAc beta 1,3-galactosyltransferase, polypeptide 2 [Source:MGI Symbol;Acc:MGI:1349461]
ENSMUSG00000053025	2.829	2.031	1.865	13.821	4.089	4.192	2.24167	7.36733	1.71657	3.13375e-06	0.000160456	Sv2b	Up	synaptic vesicle glycoprotein 2b [Source:MGI Symbol;Acc:MGI:1927338]
ENSMUSG00000066861	9.299	7.281	2.908	15.909	22.322	25.76	6.496	21.3303	1.71528	9.86676e-07	6.42648e-05	Oas1g	Up	2'-5' oligoadenylate synthetase 1G [Source:MGI Symbol;Acc:MGI:97429]
ENSMUSG00000037224	2.18	1.224	1.51	7.617	3.26	5.243	1.638	5.37333	1.71388	2.81134e-07	2.31166e-05	Zfyve28	Up	zinc finger, FYVE domain containing 28 [Source:MGI Symbol;Acc:MGI:2684992]
ENSMUSG00000040867	2.347	2.638	2.884	16.843	4.986	3.976	2.623	8.60167	1.7134	3.55977e-05	0.00108885	Begain	Up	brain-enriched guanylate kinase-associated [Source:MGI Symbol;Acc:MGI:3044626]
ENSMUSG00000007594	2.615	2.641	3.061	18.976	4.26	3.901	2.77233	9.04567	1.70613	0.000111284	0.00273647	Hapln4	Up	hyaluronan and proteoglycan link protein 4 [Source:MGI Symbol;Acc:MGI:2679531]
ENSMUSG00000049796	0.649	0.601	1.058	3.661	2.169	1.617	0.769333	2.48233	1.69002	0.00433809	0.0447908	Crh	Up	corticotropin releasing hormone [Source:MGI Symbol;Acc:MGI:88496]
ENSMUSG00000032648	9.193	6.627	6.165	47.583	14.621	8.728	7.32833	23.644	1.68992	2.081e-05	0.000718934	Pygm	Up	muscle glycogen phosphorylase [Source:MGI Symbol;Acc:MGI:97830]
ENSMUSG00000074115	2.008	1.303	1.763	2.579	6.044	7.741	1.69133	5.45467	1.68933	0.00425798	0.044367	Saa1	Up	serum amyloid A 1 [Source:MGI Symbol;Acc:MGI:98221]
ENSMUSG00000004267	45.498	44.13	42.05	244.8	96.275	83.384	43.8927	141.486	1.68861	1.22295e-09	2.71018e-07	Eno2	Up	enolase 2, gamma neuronal [Source:MGI Symbol;Acc:MGI:95394]
ENSMUSG00000010154	3.202	2.581	1.936	11.43	5.88	7.51	2.573	8.27333	1.68502	2.23653e-08	2.90302e-06	Spire2	Up	spire type actin nucleation factor 2 [Source:MGI Symbol;Acc:MGI:2446256]
ENSMUSG00000086040	1.338	0.797	0.761	3.106	1.538	4.665	0.965333	3.103	1.68456	3.41434e-05	0.0010534	Wipf3	Up	WAS/WASL interacting protein family, member 3 [Source:MGI Symbol;Acc:MGI:3044681]
ENSMUSG00000036699	2.065	4.087	4.476	21.74	8.246	4.057	3.54267	11.3477	1.67949	0.000300908	0.00598915	Zcchc12	Up	zinc finger, CCHC domain containing 12 [Source:MGI Symbol;Acc:MGI:1919943]
ENSMUSG00000030401	8.494	9.227	9.185	44.112	19.38	22.588	8.96867	28.6933	1.67775	2.32333e-10	7.27923e-08	Rtn2	Up	reticulon 2 (Z-band associated protein) [Source:MGI Symbol;Acc:MGI:107612]
ENSMUSG00000042251	1.239	0.885	0.685	6.289	1.446	1.251	0.936333	2.99533	1.67762	0.00224081	0.0275507	Pm20d1	Up	peptidase M20 domain containing 1 [Source:MGI Symbol;Acc:MGI:2442939]
ENSMUSG00000052387	3.188	2.251	2.387	16.722	4.447	3.835	2.60867	8.33467	1.67581	3.30379e-05	0.00103065	Trpm3	Up	transient receptor potential cation channel, subfamily M, member 3 [Source:MGI Symbol;Acc:MGI:2443101]
ENSMUSG00000041329	92.404	91.662	116.34	610.456	228.41	119.403	100.135	319.423	1.67352	0.00355883	0.0387717	Atp1b2	Up	ATPase, Na+/K+ transporting, beta 2 polypeptide [Source:MGI Symbol;Acc:MGI:88109]
ENSMUSG00000028039	1.242	1.934	1.5	9.19	3.743	1.92	1.55867	4.951	1.66741	0.000558199	0.0096239	Efna3	Up	ephrin A3 [Source:MGI Symbol;Acc:MGI:106644]
ENSMUSG00000062380	80.409	66.876	45.587	290.83	118.116	202.375	64.2907	203.774	1.66429	2.0925e-10	6.91361e-08	Tubb3	Up	tubulin, beta 3 class III [Source:MGI Symbol;Acc:MGI:107813]
ENSMUSG00000060240	19.443	20.47	17.786	101.575	39.14	41.816	19.233	60.8437	1.66152	1.43281e-09	3.02756e-07	Cend1	Up	cell cycle exit and neuronal differentiation 1 [Source:MGI Symbol;Acc:MGI:1929898]
ENSMUSG00000038555	11.431	7.828	8.14	47.106	18.102	21.152	9.133	28.7867	1.65624	1.03475e-08	1.51641e-06	Reep2	Up	receptor accessory protein 2 [Source:MGI Symbol;Acc:MGI:2385070]
ENSMUSG00000020155	1.109	1.055	0.897	3.2	0.927	5.518	1.02033	3.215	1.65578	0.000483813	0.00869619	Kcnmb1	Up	potassium large conductance calcium-activated channel, subfamily M, beta member 1 [Source:MGI Symbol;Acc:MGI:1334203]
ENSMUSG00000027313	2.466	2.216	2.624	11.365	6.808	4.836	2.43533	7.66967	1.65504	1.82948e-06	0.000105877	Chac1	Up	ChaC, cation transport regulator 1 [Source:MGI Symbol;Acc:MGI:1916315]
ENSMUSG00000024697	2.454	2.687	2.184	9.377	5.062	8.544	2.44167	7.661	1.64967	7.42808e-06	0.000317607	Gna14	Up	guanine nucleotide binding protein, alpha 14 [Source:MGI Symbol;Acc:MGI:95769]
ENSMUSG00000037492	0.936	0.84	0.282	3.842	0.807	1.808	0.686	2.15233	1.64962	0.00033325	0.00652312	Zmat4	Up	zinc finger, matrin type 4 [Source:MGI Symbol;Acc:MGI:2443497]
ENSMUSG00000029212	0.989	0.611	1.581	6.081	2.383	1.504	1.06033	3.32267	1.64782	1.74772e-05	0.00062956	Gabrb1	Up	gamma-aminobutyric acid type A receptor subunit beta 1 [Source:MGI Symbol;Acc:MGI:95619]
ENSMUSG00000040125	0.137	0.274	0.195	1.18	0.433	0.284	0.202	0.632333	1.64633	0.0017288	0.0226501	Gpr26	Up	G protein-coupled receptor 26 [Source:MGI Symbol;Acc:MGI:2441758]
ENSMUSG00000048899	3.374	1.826	1.363	13.21	3.419	3.908	2.18767	6.84567	1.6458	7.90511e-05	0.00207589	Rimkla	Up	ribosomal modification protein rimK-like family member A [Source:MGI Symbol;Acc:MGI:3040686]
ENSMUSG00000033316	3.587	3.622	4.077	17.747	8.756	8.745	3.762	11.7493	1.64301	6.71269e-08	6.93085e-06	Galnt9	Up	polypeptide N-acetylgalactosaminyltransferase 9 [Source:MGI Symbol;Acc:MGI:2677965]
ENSMUSG00000008658	3.412	3.862	4.274	22.515	7.137	6.397	3.84933	12.0163	1.64232	4.55336e-06	0.000215478	Rbfox1	Up	RNA binding protein, fox-1 homolog (C. elegans) 1 [Source:MGI Symbol;Acc:MGI:1926224]
ENSMUSG00000021587	0.946	0.675	1.001	4.842	1.136	2.188	0.874	2.722	1.63896	0.000161784	0.00366896	Pcsk1	Up	proprotein convertase subtilisin/kexin type 1 [Source:MGI Symbol;Acc:MGI:97511]
ENSMUSG00000070880	3.974	6.149	5.827	30.894	12.378	6.386	5.31667	16.5527	1.63847	2.0747e-05	0.000718123	Gad1	Up	glutamate decarboxylase 1 [Source:MGI Symbol;Acc:MGI:95632]
ENSMUSG00000014592	6.397	5.429	5.106	31.652	9.989	11.064	5.644	17.5683	1.63819	2.78107e-08	3.49841e-06	Camta1	Up	calmodulin binding transcription activator 1 [Source:MGI Symbol;Acc:MGI:2140230]
ENSMUSG00000002908	0.954	1.651	2.187	7.162	2.348	5.395	1.59733	4.96833	1.6371	2.88953e-05	0.000921201	Kcnn1	Up	potassium intermediate/small conductance calcium-activated channel, subfamily N, member 1 [Source:MGI Symbol;Acc:MGI:1933993]
ENSMUSG00000044676	1.234	1.049	1.744	8.52	1.871	2.122	1.34233	4.171	1.63565	0.000439854	0.00806562	Zfp612	Up	zinc finger protein 612 [Source:MGI Symbol;Acc:MGI:2443465]
ENSMUSG00000030310	9.098	8.353	9.261	52.766	19.702	10.421	8.904	27.6297	1.63369	6.44488e-06	0.000284955	Slc6a1	Up	solute carrier family 6 (neurotransmitter transporter, GABA), member 1 [Source:MGI Symbol;Acc:MGI:95627]
ENSMUSG00000022037	207.861	170.006	247.223	987.426	604.609	343.362	208.363	645.132	1.63049	3.75448e-10	1.03373e-07	Clu	Up	clusterin [Source:MGI Symbol;Acc:MGI:88423]
ENSMUSG00000048065	1.52	2.376	5.791	10.106	12.82	6.895	3.229	9.94033	1.62221	0.00043917	0.0080612	Cyb5r2	Up	cytochrome b5 reductase 2 [Source:MGI Symbol;Acc:MGI:2444415]
ENSMUSG00000057880	11.961	12.297	12.106	73.388	21.662	16.767	12.1213	37.2723	1.62056	3.85721e-06	0.000187415	Abat	Up	4-aminobutyrate aminotransferase [Source:MGI Symbol;Acc:MGI:2443582]
ENSMUSG00000024500	8.088	6.573	5.598	38.137	11.025	13.118	6.753	20.76	1.62021	2.72302e-06	0.000145172	Ppp2r2b	Up	protein phosphatase 2, regulatory subunit B, beta [Source:MGI Symbol;Acc:MGI:1920180]
ENSMUSG00000069072	2.878	2.746	1.925	14.431	4.277	4.489	2.51633	7.73233	1.61958	2.17875e-06	0.000119976	Slc7a14	Up	solute carrier family 7 (cationic amino acid transporter, y+ system), member 14 [Source:MGI Symbol;Acc:MGI:3040688]
ENSMUSG00000032101	0.935	0.834	0.697	4.652	1.224	1.693	0.822	2.523	1.61793	5.3395e-05	0.00152562	Ddx25	Up	DEAD box helicase 25 [Source:MGI Symbol;Acc:MGI:1353582]
ENSMUSG00000047842	1.789	2.203	2.423	11.813	4.187	3.68	2.13833	6.56	1.61721	6.53661e-06	0.000288309	Diras2	Up	DIRAS family, GTP-binding RAS-like 2 [Source:MGI Symbol;Acc:MGI:1915453]
ENSMUSG00000040483	37.007	33.18	21.873	100.836	93.797	87.398	30.6867	94.0103	1.61521	5.61866e-17	9.28203e-14	Xaf1	Up	XIAP associated factor 1 [Source:MGI Symbol;Acc:MGI:3772572]
ENSMUSG00000002831	0.25	0.276	0.304	1.406	0.741	0.392	0.276667	0.846333	1.61308	0.00145278	0.0198347	Plin4	Up	perilipin 4 [Source:MGI Symbol;Acc:MGI:1929709]
ENSMUSG00000028137	0.732	1.033	0.704	2.307	3.883	1.353	0.823	2.51433	1.61121	0.00108431	0.0161774	Celf3	Up	CUGBP, Elav-like family member 3 [Source:MGI Symbol;Acc:MGI:1926034]
ENSMUSG00000075478	0.685	0.804	0.822	4.148	1.45	1.461	0.770333	2.353	1.61095	6.93045e-05	0.00186302	Slitrk1	Up	SLIT and NTRK-like family, member 1 [Source:MGI Symbol;Acc:MGI:2679446]
ENSMUSG00000066189	0.982	0.61	0.66	4.877	1.416	0.582	0.750667	2.29167	1.61015	0.00320282	0.0358385	Cacng3	Up	calcium channel, voltage-dependent, gamma subunit 3 [Source:MGI Symbol;Acc:MGI:1859165]
ENSMUSG00000035681	1.003	0.932	0.921	6.014	1.484	1.214	0.952	2.904	1.60901	0.000333957	0.00652545	Kcnc2	Up	potassium voltage gated channel, Shaw-related subfamily, member 2 [Source:MGI Symbol;Acc:MGI:96668]
ENSMUSG00000105504	5.135	6.393	2.777	26.45	7.133	10.049	4.76833	14.544	1.60887	1.85707e-05	0.000661231	Gbp5	Up	guanylate binding protein 5 [Source:MGI Symbol;Acc:MGI:2429943]
ENSMUSG00000028268	17.625	15.272	8.377	65.493	27.262	32.712	13.758	41.8223	1.604	1.27236e-08	1.82057e-06	Gbp3	Up	guanylate binding protein 3 [Source:MGI Symbol;Acc:MGI:1926263]
ENSMUSG00000046204	1.009	0.521	0.487	3.926	0.964	1.225	0.672333	2.03833	1.60014	0.000649859	0.0109345	Pnma2	Up	paraneoplastic antigen MA2 [Source:MGI Symbol;Acc:MGI:2444129]
ENSMUSG00000078880	3.649	0.667	2.215	8.157	4.637	6.998	2.177	6.59733	1.59954	0.00214259	0.0266132	Gm14308	Up	predicted gene 14308 [Source:MGI Symbol;Acc:MGI:3782921]
ENSMUSG00000067242	5.375	3.34	3.436	24.178	6.249	6.396	4.05033	12.2743	1.59953	9.40498e-06	0.000388426	Lgi1	Up	leucine-rich repeat LGI family, member 1 [Source:MGI Symbol;Acc:MGI:1861691]
ENSMUSG00000035929	33.866	37.124	27.015	98.537	88.492	109.888	32.6683	98.9723	1.59913	7.40908e-15	8.41486e-12	H2-Q4	Up	histocompatibility 2, Q region locus 4 [Source:MGI Symbol;Acc:MGI:95933]
ENSMUSG00000035640	3.92	5.878	6.906	27.756	11.73	10.874	5.568	16.7867	1.59208	4.57444e-07	3.44775e-05	Cbarp	Up	calcium channel, voltage-dependent, beta subunit associated regulatory protein [Source:MGI Symbol;Acc:MGI:1354170]
ENSMUSG00000102252	49.505	48.955	43.142	242.52	95.035	89.271	47.2007	142.275	1.59181	3.46645e-09	6.52884e-07	Snrpn	Up	small nuclear ribonucleoprotein N [Source:MGI Symbol;Acc:MGI:98347]
ENSMUSG00000063646	3.5	1.342	1.232	9.075	3.697	5.526	2.02467	6.09933	1.59097	3.23323e-07	2.56569e-05	Jakmip1	Up	janus kinase and microtubule interacting protein 1 [Source:MGI Symbol;Acc:MGI:1923321]
ENSMUSG00000015981	1.774	2.201	1.906	8.678	4.846	4.176	1.96033	5.9	1.58962	2.57886e-06	0.000139473	Stk32c	Up	serine/threonine kinase 32C [Source:MGI Symbol;Acc:MGI:2385336]
ENSMUSG00000024008	0.3	0.74	0.488	2.557	1.075	0.966	0.509333	1.53267	1.58936	1.02179e-05	0.000411453	Cpne5	Up	copine V [Source:MGI Symbol;Acc:MGI:2385908]
ENSMUSG00000026797	26.738	25.176	27.281	139.082	47.181	52.01	26.3983	79.4243	1.58913	3.84034e-08	4.53161e-06	Stxbp1	Up	syntaxin binding protein 1 [Source:MGI Symbol;Acc:MGI:107363]
ENSMUSG00000026344	1.546	2.455	1.074	9.41	3.903	1.911	1.69167	5.07467	1.58487	0.000424731	0.00790486	Lypd1	Up	Ly6/Plaur domain containing 1 [Source:MGI Symbol;Acc:MGI:1919835]
ENSMUSG00000000204	10.008	4.69	2.353	17.959	17.803	15.339	5.68367	17.0337	1.5835	6.63691e-06	0.000290617	Slfn4	Up	schlafen 4 [Source:MGI Symbol;Acc:MGI:1329010]
ENSMUSG00000022763	1.092	1.446	0.879	6.159	2.815	1.263	1.139	3.41233	1.58299	0.000957009	0.0146634	Aifm3	Up	apoptosis-inducing factor, mitochondrion-associated 3 [Source:MGI Symbol;Acc:MGI:1919418]
ENSMUSG00000053141	1.537	1.042	1.042	6.134	1.623	3.085	1.207	3.614	1.58217	4.3106e-06	0.000205597	Ptprt	Up	protein tyrosine phosphatase receptor type T [Source:MGI Symbol;Acc:MGI:1321152]
ENSMUSG00000034730	3.233	4.055	3.587	21.266	6.758	4.525	3.625	10.8497	1.5816	1.40411e-05	0.000532681	Adgrb1	Up	adhesion G protein-coupled receptor B1 [Source:MGI Symbol;Acc:MGI:1933736]
ENSMUSG00000028222	0.579	0.618	1.145	3.691	2.252	1.053	0.780667	2.332	1.57879	0.000602972	0.01025	Calb1	Up	calbindin 1 [Source:MGI Symbol;Acc:MGI:88248]
ENSMUSG00000046718	132.2	113.933	96.131	279.291	340.681	393.311	114.088	337.761	1.56586	1.24342e-12	7.79152e-10	Bst2	Up	bone marrow stromal cell antigen 2 [Source:MGI Symbol;Acc:MGI:1916800]
ENSMUSG00000028445	10.892	13.668	11.509	66.449	25.299	15	12.023	35.5827	1.56538	2.1659e-05	0.000739826	Enho	Up	energy homeostasis associated [Source:MGI Symbol;Acc:MGI:1916888]
ENSMUSG00000038576	3.152	3.662	2.8	17.673	6.387	4.318	3.20467	9.45933	1.56156	1.98096e-05	0.00069128	Susd4	Up	sushi domain containing 4 [Source:MGI Symbol;Acc:MGI:2138351]
ENSMUSG00000078853	13.73	17.498	8.172	53.946	30.319	32.03	13.1333	38.765	1.56152	2.73142e-09	5.39514e-07	Igtp	Up	interferon gamma induced GTPase [Source:MGI Symbol;Acc:MGI:107729]
ENSMUSG00000018451	21.941	33.525	32.334	147.276	72.91	38.926	29.2667	86.3707	1.56128	1.86568e-06	0.000107289	6330403K07Rik	Up	RIKEN cDNA 6330403K07 gene [Source:MGI Symbol;Acc:MGI:1918001]
ENSMUSG00000018566	1.351	1.383	1.234	6.801	3.138	1.757	1.32267	3.89867	1.55953	0.000543698	0.00947276	Slc2a4	Up	solute carrier family 2 (facilitated glucose transporter), member 4 [Source:MGI Symbol;Acc:MGI:95758]
ENSMUSG00000040026	25.565	44.527	22.444	51.588	119.928	101.13	30.8453	90.882	1.55894	3.441e-06	0.000171315	Saa3	Up	serum amyloid A 3 [Source:MGI Symbol;Acc:MGI:98223]
ENSMUSG00000036832	1.042	0.552	0.784	2.5	0.705	3.79	0.792667	2.33167	1.55658	0.00458621	0.0466372	Lpar3	Up	lysophosphatidic acid receptor 3 [Source:MGI Symbol;Acc:MGI:1929469]
ENSMUSG00000042750	15.787	21.114	17.719	80.538	37.93	42.062	18.2067	53.51	1.55534	4.52531e-09	7.68906e-07	Bex2	Up	brain expressed X-linked 2 [Source:MGI Symbol;Acc:MGI:1338017]
ENSMUSG00000027827	3.813	4.584	3.64	20.236	5.46	9.625	4.01233	11.7737	1.55305	2.0272e-06	0.000113698	Kcnab1	Up	potassium voltage-gated channel, shaker-related subfamily, beta member 1 [Source:MGI Symbol;Acc:MGI:109155]
ENSMUSG00000022758	0.391	0.844	0.778	3	1.264	1.632	0.671	1.96533	1.55039	0.00312861	0.0352074	P2rx6	Up	purinergic receptor P2X, ligand-gated ion channel, 6 [Source:MGI Symbol;Acc:MGI:1337113]
ENSMUSG00000036913	0.518	0.485	0.455	2.047	0.702	1.507	0.486	1.41867	1.54551	3.54602e-05	0.00108665	Trim67	Up	tripartite motif-containing 67 [Source:MGI Symbol;Acc:MGI:3045323]
ENSMUSG00000035390	11.992	12.88	12.45	68.267	23.251	17.367	12.4407	36.295	1.54471	1.26594e-06	7.93266e-05	Brsk1	Up	BR serine/threonine kinase 1 [Source:MGI Symbol;Acc:MGI:2685946]
ENSMUSG00000032502	1.553	0.809	1.456	3.881	1.044	6.199	1.27267	3.708	1.54279	0.00215025	0.0266869	Stac	Up	src homology three (SH3) and cysteine rich domain [Source:MGI Symbol;Acc:MGI:1201400]
ENSMUSG00000043913	0.243	0.311	0.436	1.227	0.898	0.758	0.33	0.961	1.54207	0.00436528	0.0449592	Ccdc60	Up	coiled-coil domain containing 60 [Source:MGI Symbol;Acc:MGI:2141043]
ENSMUSG00000031654	1.381	1.27	1.872	7.112	4.234	1.807	1.50767	4.38433	1.54004	0.000486928	0.00873491	Cbln1	Up	cerebellin 1 precursor protein [Source:MGI Symbol;Acc:MGI:88281]
ENSMUSG00000079363	3.736	7.241	5.36	18.977	11.649	16.86	5.44567	15.8287	1.53936	9.61266e-07	6.30618e-05	Gbp4	Up	guanylate binding protein 4 [Source:MGI Symbol;Acc:MGI:97072]
ENSMUSG00000036040	0.576	0.377	0.476	2.408	1.019	0.714	0.476333	1.38033	1.53497	0.00337226	0.0372074	Adamtsl2	Up	ADAMTS-like 2 [Source:MGI Symbol;Acc:MGI:1925044]
ENSMUSG00000053297	0.654	0.741	1.295	4.957	1.752	1.075	0.896667	2.59467	1.53291	0.000208204	0.00452029	AI854703	Up	expressed sequence AI854703 [Source:MGI Symbol;Acc:MGI:2141510]
ENSMUSG00000030666	4.45	1.65	4.912	12.156	4.039	15.626	3.67067	10.607	1.5309	0.00205522	0.0258818	Calcb	Up	calcitonin-related polypeptide, beta [Source:MGI Symbol;Acc:MGI:2151254]
ENSMUSG00000032589	2.21	1.903	1.58	9.025	3.191	4.215	1.89767	5.477	1.52916	9.42339e-07	6.22698e-05	Bsn	Up	bassoon [Source:MGI Symbol;Acc:MGI:1277955]
ENSMUSG00000029769	9.105	8.086	7.684	38.265	17.358	16.16	8.29167	23.9277	1.52895	9.70214e-08	9.53012e-06	Ccdc136	Up	coiled-coil domain containing 136 [Source:MGI Symbol;Acc:MGI:1918128]
ENSMUSG00000039154	1.501	2.37	1.518	8.913	3.472	3.156	1.79633	5.18033	1.52799	0.00132702	0.0185783	Shd	Up	src homology 2 domain-containing transforming protein D [Source:MGI Symbol;Acc:MGI:1099461]
ENSMUSG00000007030	0.839	0.354	0.457	2.233	0.987	1.537	0.55	1.58567	1.52759	0.000528188	0.00927365	Vwa7	Up	von Willebrand factor A domain containing 7 [Source:MGI Symbol;Acc:MGI:1306798]
ENSMUSG00000024462	22.6	23.522	23.778	118.047	43.293	40.119	23.3	67.153	1.52712	6.56495e-08	6.81704e-06	Gabbr1	Up	gamma-aminobutyric acid type B receptor subunit 1 [Source:MGI Symbol;Acc:MGI:1860139]
ENSMUSG00000006342	6.366	3.346	5.905	17.444	9.28	18.264	5.20567	14.996	1.52642	3.499e-07	2.71726e-05	Susd2	Up	sushi domain containing 2 [Source:MGI Symbol;Acc:MGI:1918983]
ENSMUSG00000028051	0.451	0.283	0.376	1.449	0.588	1.156	0.37	1.06433	1.52435	0.00302372	0.0344065	Hcn3	Up	hyperpolarization-activated, cyclic nucleotide-gated K+ 3 [Source:MGI Symbol;Acc:MGI:1298211]
ENSMUSG00000027950	1.41	1.201	1.611	6.345	2.483	3.31	1.40733	4.046	1.52353	5.61227e-07	4.04707e-05	Chrnb2	Up	cholinergic receptor nicotinic beta 2 subunit [Source:MGI Symbol;Acc:MGI:87891]
ENSMUSG00000009185	13.883	12.867	5.674	16.076	30.013	46.999	10.808	31.0293	1.52153	0.000187307	0.0041509	Ccl8	Up	C-C motif chemokine ligand 8 [Source:MGI Symbol;Acc:MGI:101878]
ENSMUSG00000030428	22.034	24.943	22.736	122.023	46.418	31.669	23.2377	66.7033	1.52129	1.30956e-06	8.09431e-05	Ttyh1	Up	tweety family member 1 [Source:MGI Symbol;Acc:MGI:1889007]
ENSMUSG00000030303	1.291	0.928	1.555	5.218	2.376	3.194	1.258	3.596	1.51526	2.43217e-05	0.000807996	Far2	Up	fatty acyl CoA reductase 2 [Source:MGI Symbol;Acc:MGI:2687035]
ENSMUSG00000043342	1.26	1.911	2.061	8.427	3.446	3.082	1.744	4.985	1.51519	0.000285919	0.00579234	Hoxd9	Up	homeobox D9 [Source:MGI Symbol;Acc:MGI:96210]
ENSMUSG00000041141	1.166	1.552	1.995	8.093	3.525	1.849	1.571	4.489	1.51471	0.00035719	0.0068832	Pnma8a	Up	PNMA family member 8A [Source:MGI Symbol;Acc:MGI:1918941]
ENSMUSG00000070802	7.728	7.353	8.83	42.066	16.593	9.523	7.97033	22.7273	1.51172	1.30536e-05	0.000505777	Pnma8b	Up	PNMA family member 8B [Source:MGI Symbol;Acc:MGI:3645856]
ENSMUSG00000024366	1.837	0.851	1.075	3.811	1.946	4.944	1.25433	3.567	1.50779	0.000812733	0.0129029	Gfra3	Up	glial cell line derived neurotrophic factor family receptor alpha 3 [Source:MGI Symbol;Acc:MGI:1201403]
ENSMUSG00000045348	2.978	3.246	2.634	12.668	5.903	6.566	2.95267	8.379	1.50476	5.38351e-08	5.85804e-06	Nyap1	Up	neuronal tyrosine-phosphorylated phosphoinositide 3-kinase adaptor 1 [Source:MGI Symbol;Acc:MGI:2443880]
ENSMUSG00000032936	0.744	1.557	1.606	5.862	3.557	1.656	1.30233	3.69167	1.50317	0.000677634	0.0112662	Camkv	Up	CaM kinase-like vesicle-associated [Source:MGI Symbol;Acc:MGI:2384296]
ENSMUSG00000036095	0.472	0.597	0.981	3.964	1.075	0.77	0.683333	1.93633	1.50267	0.001201	0.0173348	Dgkb	Up	diacylglycerol kinase, beta [Source:MGI Symbol;Acc:MGI:2442474]
ENSMUSG00000048814	2.771	2.539	2.648	14.328	4.099	4.115	2.65267	7.514	1.50214	1.15618e-05	0.000457736	Lonrf2	Up	LON peptidase N-terminal domain and ring finger 2 [Source:MGI Symbol;Acc:MGI:1920209]
ENSMUSG00000030237	7.448	4.644	5.743	34.687	8.905	6.845	5.945	16.8123	1.49977	2.57238e-06	0.000139473	Slco1a4	Up	solute carrier organic anion transporter family, member 1a4 [Source:MGI Symbol;Acc:MGI:1351896]
ENSMUSG00000004113	1.32	0.882	1.283	3.735	1.899	4.219	1.16167	3.28433	1.4994	1.63725e-05	0.000599841	Cacna1b	Up	calcium channel, voltage-dependent, N type, alpha 1B subunit [Source:MGI Symbol;Acc:MGI:88296]
ENSMUSG00000043419	6.687	6.195	5.023	35.777	9.919	4.83	5.96833	16.842	1.49666	0.000561502	0.00967167	Rnf227	Up	ring finger protein 227 [Source:MGI Symbol;Acc:MGI:1915359]
ENSMUSG00000003354	0.708	0.477	1.13	3.497	1.668	1.358	0.771667	2.17433	1.49452	0.00478278	0.0481778	Ccdc65	Up	coiled-coil domain containing 65 [Source:MGI Symbol;Acc:MGI:2146001]
ENSMUSG00000031837	1.238	1.262	1.413	6.419	2.691	1.891	1.30433	3.667	1.49129	0.00133146	0.0186261	Necab2	Up	N-terminal EF-hand calcium binding protein 2 [Source:MGI Symbol;Acc:MGI:2152211]
ENSMUSG00000061601	1.386	1.158	1.287	6.403	2.065	2.302	1.277	3.59	1.49123	5.82069e-05	0.00162896	Pclo	Up	piccolo (presynaptic cytomatrix protein) [Source:MGI Symbol;Acc:MGI:1349390]
ENSMUSG00000055733	3.104	2.517	1.893	13.371	4.072	3.606	2.50467	7.01633	1.4861	0.000214455	0.00459303	Nap1l3	Up	nucleosome assembly protein 1-like 3 [Source:MGI Symbol;Acc:MGI:1859565]
ENSMUSG00000030093	1.504	1.787	1.93	10.245	2.933	1.43	1.74033	4.86933	1.48436	0.003589	0.0390301	Wnt7a	Up	wingless-type MMTV integration site family, member 7A [Source:MGI Symbol;Acc:MGI:98961]
ENSMUSG00000002980	18.884	12.741	20.027	45.309	31.443	67.747	17.2173	48.1663	1.48416	3.29049e-07	2.58852e-05	Bcam	Up	basal cell adhesion molecule [Source:MGI Symbol;Acc:MGI:1929940]
ENSMUSG00000004031	1.525	1.904	2.898	9.625	4.515	3.539	2.109	5.893	1.48244	3.57902e-05	0.00109124	Brinp2	Up	bone morphogenic protein/retinoic acid inducible neural-specific 2 [Source:MGI Symbol;Acc:MGI:2443333]
ENSMUSG00000018849	2.268	3.853	4.242	19.997	5.483	3.475	3.45433	9.65167	1.48237	0.00109627	0.0162757	Wwc1	Up	WW, C2 and coiled-coil domain containing 1 [Source:MGI Symbol;Acc:MGI:2388637]
ENSMUSG00000071658	14.035	15.087	12.603	55.686	22.187	38.603	13.9083	38.8253	1.48105	4.19243e-08	4.82182e-06	Gng3	Up	guanine nucleotide binding protein (G protein), gamma 3 [Source:MGI Symbol;Acc:MGI:102704]
ENSMUSG00000033419	9.305	7.838	5.157	40.308	10.361	11.563	7.43333	20.744	1.48061	2.63624e-05	0.000858527	Snap91	Up	synaptosomal-associated protein 91 [Source:MGI Symbol;Acc:MGI:109132]
ENSMUSG00000042182	13.771	13.72	9.919	73.211	15.097	15.927	12.47	34.745	1.47834	0.000287423	0.00580985	Bend6	Up	BEN domain containing 6 [Source:MGI Symbol;Acc:MGI:2444572]
ENSMUSG00000022594	18.972	17.78	20.198	87.055	36.902	34.514	18.9833	52.8237	1.47645	4.44832e-09	7.68906e-07	Lynx1	Up	Ly6/neurotoxin 1 [Source:MGI Symbol;Acc:MGI:1345180]
ENSMUSG00000033389	4.922	4.662	5.143	24.082	9.267	7.619	4.909	13.656	1.47603	3.20958e-06	0.000163374	Arhgap44	Up	Rho GTPase activating protein 44 [Source:MGI Symbol;Acc:MGI:2144423]
ENSMUSG00000028655	6.937	8.746	9.685	45.643	16.383	8.482	8.456	23.5027	1.47478	7.61557e-05	0.00200856	Mfsd2a	Up	MFSD2 lysolipid transporter A, lysophospholipid [Source:MGI Symbol;Acc:MGI:1923824]
ENSMUSG00000004961	3.94	4.701	8.717	22.226	12.046	13.938	5.786	16.07	1.47373	4.42527e-06	0.000210513	Syt5	Up	synaptotagmin V [Source:MGI Symbol;Acc:MGI:1926368]
ENSMUSG00000030854	4.356	4.293	4.542	21.687	9.275	5.601	4.397	12.1877	1.47083	1.84581e-05	0.000661231	Ptpn5	Up	protein tyrosine phosphatase, non-receptor type 5 [Source:MGI Symbol;Acc:MGI:97807]
ENSMUSG00000056648	6.174	7.696	10.272	33.616	19.321	13.976	8.04733	22.3043	1.47074	2.84116e-07	2.32565e-05	Hoxb8	Up	homeobox B8 [Source:MGI Symbol;Acc:MGI:96189]
ENSMUSG00000027500	48.265	43.146	43.773	215.973	61.504	96.073	45.0613	124.517	1.46638	8.72683e-07	5.8447e-05	Stmn2	Up	stathmin-like 2 [Source:MGI Symbol;Acc:MGI:98241]
ENSMUSG00000073514	1.138	1.122	1.063	6.747	1.367	1.057	1.10767	3.057	1.46459	0.00207311	0.025962	Dok6	Up	docking protein 6 [Source:MGI Symbol;Acc:MGI:3639495]
ENSMUSG00000056222	11.452	7.862	11.178	48.379	20.655	14.882	10.164	27.972	1.46052	2.19195e-07	1.88778e-05	Spock1	Up	sparc/osteonectin, cwcv and kazal-like domains proteoglycan 1 [Source:MGI Symbol;Acc:MGI:105371]
ENSMUSG00000005338	25.234	20.598	21.582	86.746	54.427	43.92	22.4713	61.6977	1.45713	2.47455e-14	2.39047e-11	Cadm3	Up	cell adhesion molecule 3 [Source:MGI Symbol;Acc:MGI:2137858]
ENSMUSG00000054423	8.298	7.885	7.978	43.137	8.472	14.641	8.05367	22.0833	1.45524	2.0019e-06	0.000113067	Cadps	Up	Ca2+-dependent secretion activator [Source:MGI Symbol;Acc:MGI:1350922]
ENSMUSG00000041817	1.11	0.972	1.331	6.09	1.868	1.394	1.13767	3.11733	1.45423	0.00163425	0.0217087	Fam169a	Up	family with sequence similarity 169, member A [Source:MGI Symbol;Acc:MGI:2444268]
ENSMUSG00000030088	11.769	13.325	16.472	67.992	30.242	15.641	13.8553	37.9583	1.45398	1.89027e-05	0.000668287	Aldh1l1	Up	aldehyde dehydrogenase 1 family, member L1 [Source:MGI Symbol;Acc:MGI:1340024]
ENSMUSG00000045114	5.331	5.62	5.436	24.828	10.324	9.638	5.46233	14.93	1.45062	1.3864e-06	8.51137e-05	Prrt2	Up	proline-rich transmembrane protein 2 [Source:MGI Symbol;Acc:MGI:1916267]
ENSMUSG00000074607	1.951	1.745	2.703	10.551	3.897	3.036	2.133	5.828	1.45012	0.000134448	0.0031691	Tox2	Up	TOX high mobility group box family member 2 [Source:MGI Symbol;Acc:MGI:3611233]
ENSMUSG00000020926	2.445	2.634	1.737	8.839	4.332	5.45	2.272	6.207	1.44993	1.06282e-07	1.00952e-05	Adam11	Up	a disintegrin and metallopeptidase domain 11 [Source:MGI Symbol;Acc:MGI:1098667]
ENSMUSG00000050711	13.669	21.027	28.901	109.668	32.285	31.721	21.199	57.8913	1.44935	0.000139191	0.0032595	Scg2	Up	secretogranin II [Source:MGI Symbol;Acc:MGI:103033]
ENSMUSG00000042115	1.547	1.195	2.641	8.009	3.784	2.896	1.79433	4.89633	1.44825	0.000139597	0.00326481	Klhdc8a	Up	kelch domain containing 8A [Source:MGI Symbol;Acc:MGI:2442630]
ENSMUSG00000074896	50.116	31.34	14.277	110.671	75.604	74.779	31.911	87.018	1.44726	7.13456e-07	4.92963e-05	Ifit3	Up	interferon-induced protein with tetratricopeptide repeats 3 [Source:MGI Symbol;Acc:MGI:1101055]
ENSMUSG00000020701	2.835	2.209	1.988	8.66	4.209	6.289	2.344	6.386	1.44594	2.08752e-07	1.83258e-05	Tmem132e	Up	transmembrane protein 132E [Source:MGI Symbol;Acc:MGI:2685490]
ENSMUSG00000022629	14.864	9.879	13.916	50.959	21.139	33.162	12.8863	35.0867	1.44508	3.13987e-06	0.000160456	Kif21a	Up	kinesin family member 21A [Source:MGI Symbol;Acc:MGI:109188]
ENSMUSG00000021730	0.96	0.818	0.775	3.725	1.497	1.724	0.851	2.31533	1.44399	6.73914e-07	4.72833e-05	Hcn1	Up	hyperpolarization activated cyclic nucleotide gated potassium channel 1 [Source:MGI Symbol;Acc:MGI:1096392]
ENSMUSG00000108348	1.11	1.7	1.272	7.963	1.332	1.808	1.36067	3.701	1.4436	0.00361067	0.039172	Pnma8c	Up	PNMA family member 8C [Source:MGI Symbol;Acc:MGI:5625257]
ENSMUSG00000021340	4.387	5.966	7.502	30.76	10.636	7.151	5.95167	16.1823	1.44305	0.000130373	0.00310504	Gpld1	Up	glycosylphosphatidylinositol specific phospholipase D1 [Source:MGI Symbol;Acc:MGI:106604]
ENSMUSG00000033249	1.611	1.509	1.563	7.489	2.616	2.608	1.561	4.23767	1.4408	0.00150058	0.0202759	Hsf4	Up	heat shock transcription factor 4 [Source:MGI Symbol;Acc:MGI:1347058]
ENSMUSG00000031760	81.631	81.767	83.266	408.922	143.999	116.275	82.2213	223.065	1.43988	5.51522e-06	0.000251027	Mt3	Up	metallothionein 3 [Source:MGI Symbol;Acc:MGI:97173]
ENSMUSG00000040170	1	0.585	0.475	1.647	1.811	2.129	0.686667	1.86233	1.43943	0.000298337	0.00596039	Fmo2	Up	flavin containing monooxygenase 2 [Source:MGI Symbol;Acc:MGI:1916776]
ENSMUSG00000024376	1.235	1.176	1.325	5.285	2.925	1.921	1.24533	3.377	1.43921	6.87136e-05	0.00185033	Epb41l4a	Up	erythrocyte membrane protein band 4.1 like 4a [Source:MGI Symbol;Acc:MGI:103007]
ENSMUSG00000027834	1.878	2.41	2.718	11.34	3.049	4.609	2.33533	6.33267	1.43918	5.47038e-06	0.000250063	Serpini1	Up	serine (or cysteine) peptidase inhibitor, clade I, member 1 [Source:MGI Symbol;Acc:MGI:1194506]
ENSMUSG00000033998	4.381	4.362	3.426	22.392	4.141	6.461	4.05633	10.998	1.43899	0.0018562	0.0239395	Kcnk1	Up	potassium channel, subfamily K, member 1 [Source:MGI Symbol;Acc:MGI:109322]
ENSMUSG00000030030	0.839	1.707	1.317	5.588	2.589	2.296	1.28767	3.491	1.43888	0.00141906	0.0194914	1700003E16Rik	Up	RIKEN cDNA 1700003E16 gene [Source:MGI Symbol;Acc:MGI:1919087]
ENSMUSG00000049422	33.975	44.676	42.31	166.179	99.624	61.955	40.3203	109.253	1.43809	4.64638e-08	5.18e-06	Chchd10	Up	coiled-coil-helix-coiled-coil-helix domain containing 10 [Source:MGI Symbol;Acc:MGI:2143558]
ENSMUSG00000050132	1.341	1.37	1.145	5.334	2.707	2.367	1.28533	3.46933	1.43252	2.19813e-06	0.000120678	Sarm1	Up	sterile alpha and HEAT/Armadillo motif containing 1 [Source:MGI Symbol;Acc:MGI:2136419]
ENSMUSG00000006576	6.146	4.956	4.754	24.281	10.619	7.805	5.28533	14.235	1.42938	1.17181e-05	0.000459915	Slc4a3	Up	solute carrier family 4 (anion exchanger), member 3 [Source:MGI Symbol;Acc:MGI:109350]
ENSMUSG00000028833	29.618	30.778	33.012	142.218	58.176	50.904	31.136	83.766	1.42778	7.19479e-08	7.38048e-06	Ncdn	Up	neurochondrin [Source:MGI Symbol;Acc:MGI:1347351]
ENSMUSG00000024256	4.219	7.858	7.361	27.637	14.233	10.253	6.47933	17.3743	1.42304	9.37398e-06	0.000388027	Adcyap1	Up	adenylate cyclase activating polypeptide 1 [Source:MGI Symbol;Acc:MGI:105094]
ENSMUSG00000079018	92.966	126.836	95.061	320.683	278.38	244.517	104.954	281.193	1.4218	2.49318e-15	3.48508e-12	Ly6c1	Up	lymphocyte antigen 6 family member C1 [Source:MGI Symbol;Acc:MGI:96882]
ENSMUSG00000044647	0.768	0.944	0.724	3.977	1.103	1.424	0.812	2.168	1.41681	0.000287849	0.00581198	Csrnp3	Up	cysteine-serine-rich nuclear protein 3 [Source:MGI Symbol;Acc:MGI:1925021]
ENSMUSG00000036800	0.278	0.23	0.299	1.441	0.366	0.347	0.269	0.718	1.41638	0.00191801	0.024459	Fam135b	Up	family with sequence similarity 135, member B [Source:MGI Symbol;Acc:MGI:1917613]
ENSMUSG00000058743	0.776	0.619	1.202	3.695	2.174	1.062	0.865667	2.31033	1.41622	0.00395275	0.042104	Kcnj14	Up	potassium inwardly-rectifying channel, subfamily J, member 14 [Source:MGI Symbol;Acc:MGI:2384820]
ENSMUSG00000051726	0.46	0.355	0.583	1.539	0.555	1.634	0.466	1.24267	1.41504	0.00354382	0.0386774	Kcnf1	Up	potassium voltage-gated channel, subfamily F, member 1 [Source:MGI Symbol;Acc:MGI:2687399]
ENSMUSG00000031428	12.972	11.724	11.434	54.285	22.603	19.441	12.0433	32.1097	1.41477	5.50151e-07	3.98301e-05	Zcchc18	Up	zinc finger, CCHC domain containing 18 [Source:MGI Symbol;Acc:MGI:1914245]
ENSMUSG00000062542	2.371	1.901	2.11	6.045	2.025	8.944	2.12733	5.67133	1.41464	0.000584145	0.00998596	Syt9	Up	synaptotagmin IX [Source:MGI Symbol;Acc:MGI:1926373]
ENSMUSG00000037686	9.253	5.247	8.671	21.282	20.785	19.663	7.72367	20.5767	1.41365	7.73935e-12	3.51598e-09	Aspg	Up	asparaginase [Source:MGI Symbol;Acc:MGI:2144822]
ENSMUSG00000015222	27.263	26.895	24.842	81.314	61.989	66.529	26.3333	69.944	1.40931	0.00229553	0.0146315	Map2	Up	microtubule-associated protein 2 [Source:MGI Symbol;Acc:MGI:97175]
ENSMUSG00000053519	3.778	3.516	3.84	15.365	8.49	5.677	3.71133	9.844	1.40731	1.84679e-05	0.000661231	Kcnip1	Up	Kv channel-interacting protein 1 [Source:MGI Symbol;Acc:MGI:1917607]
ENSMUSG00000026535	64.509	55.244	50.434	182.599	114.052	154.365	56.729	150.339	1.40606	2.60404e-13	2.05741e-10	Ifi202b	Up	interferon activated gene 202B [Source:MGI Symbol;Acc:MGI:1347083]
ENSMUSG00000059974	5.114	6.039	6.471	33.193	8.343	5.143	5.87467	15.5597	1.40523	0.00115575	0.0168693	Ntm	Up	neurotrimin [Source:MGI Symbol;Acc:MGI:2446259]
ENSMUSG00000079598	2.992	3.248	3.152	13.761	4.644	6.465	3.13067	8.29	1.4049	0.000239866	0.00501017	Clec2l	Up	C-type lectin domain family 2, member L [Source:MGI Symbol;Acc:MGI:2141402]
ENSMUSG00000032549	19.937	15.848	11.41	70.809	19.743	34.303	15.7317	41.6183	1.40355	5.76221e-06	0.000261124	Rab6b	Up	RAB6B, member RAS oncogene family [Source:MGI Symbol;Acc:MGI:107283]
ENSMUSG00000029449	2.231	2.552	3.097	11.683	4.949	4.124	2.62667	6.91867	1.39726	0.000752376	0.012153	Rhof	Up	ras homolog family member F (in filopodia) [Source:MGI Symbol;Acc:MGI:1345629]
ENSMUSG00000032281	34.087	32.639	37.72	170.996	64.343	39.724	34.8153	91.6877	1.397	3.00401e-05	0.000951026	Acsbg1	Up	acyl-CoA synthetase bubblegum family member 1 [Source:MGI Symbol;Acc:MGI:2385656]
ENSMUSG00000002228	3.838	2.767	2.87	5.967	4.04	14.937	3.15833	8.31467	1.39649	0.00091472	0.0140986	Ppm1j	Up	protein phosphatase 1J [Source:MGI Symbol;Acc:MGI:1919137]
ENSMUSG00000027514	46.955	47.783	22.539	87.844	100.507	118.886	39.0923	102.412	1.38943	4.24349e-08	4.84985e-06	Zbp1	Up	Z-DNA binding protein 1 [Source:MGI Symbol;Acc:MGI:1927449]
ENSMUSG00000056755	0.955	0.702	1.383	4.801	1.116	2.044	1.01333	2.65367	1.38888	0.000104158	0.00259996	Grm7	Up	glutamate receptor, metabotropic 7 [Source:MGI Symbol;Acc:MGI:1351344]
ENSMUSG00000039478	5.389	4.418	4.694	22.269	6.769	8.926	4.83367	12.6547	1.38848	3.24208e-05	0.00101578	Micu3	Up	mitochondrial calcium uptake family, member 3 [Source:MGI Symbol;Acc:MGI:1925756]
ENSMUSG00000021913	8.246	8.678	8.999	43.571	14.5	9.605	8.641	22.5587	1.38441	0.000122987	0.00294845	Ogdhl	Up	oxoglutarate dehydrogenase-like [Source:MGI Symbol;Acc:MGI:3616088]
ENSMUSG00000050947	4.49	3.002	3.29	12.716	6.09	9.327	3.594	9.37767	1.38364	2.58065e-08	3.32593e-06	Amigo1	Up	adhesion molecule with Ig like domain 1 [Source:MGI Symbol;Acc:MGI:2653612]
ENSMUSG00000002012	2.53	3.552	4.634	17.334	7.038	3.587	3.572	9.31967	1.38355	0.00365794	0.0395431	Pnck	Up	pregnancy upregulated non-ubiquitously expressed CaM kinase [Source:MGI Symbol;Acc:MGI:1347357]
ENSMUSG00000033065	28.794	32.536	30.175	149.811	49.269	39.405	30.5017	79.495	1.38198	1.68766e-05	0.000613345	Pfkm	Up	phosphofructokinase, muscle [Source:MGI Symbol;Acc:MGI:97548]
ENSMUSG00000069227	1.211	1.506	1.289	5.877	2.357	2.202	1.33533	3.47867	1.38133	0.000147334	0.00340705	Gprin1	Up	G protein-regulated inducer of neurite outgrowth 1 [Source:MGI Symbol;Acc:MGI:1349455]
ENSMUSG00000074736	2.327	3.752	4.138	16.577	6.177	3.818	3.40567	8.85733	1.37894	0.00150637	0.0203069	Syndig1	Up	synapse differentiation inducing 1 [Source:MGI Symbol;Acc:MGI:3702158]
ENSMUSG00000019775	2.31	1.287	1.676	8.611	3.074	2.019	1.75767	4.568	1.3779	0.000143339	0.00332665	Rgs17	Up	regulator of G-protein signaling 17 [Source:MGI Symbol;Acc:MGI:1927469]
ENSMUSG00000068099	6.623	8.404	5.812	30.984	18.449	4.703	6.94633	18.0453	1.3773	0.00130144	0.0182949	Smim45	Up	small integral membrane protein 45 [Source:MGI Symbol;Acc:MGI:1923755]
ENSMUSG00000038370	24.044	29.832	38.882	115.752	67.881	57.194	30.9193	80.2757	1.37645	4.57518e-08	5.13211e-06	Pcp4l1	Up	Purkinje cell protein 4-like 1 [Source:MGI Symbol;Acc:MGI:1913675]
ENSMUSG00000024617	3.929	5.185	5.063	18.465	8.585	9.74	4.72567	12.2633	1.37576	1.23986e-07	1.14953e-05	Camk2a	Up	calcium/calmodulin-dependent protein kinase II alpha [Source:MGI Symbol;Acc:MGI:88256]
ENSMUSG00000042216	2.666	3.433	3.177	12.518	6.51	4.982	3.092	8.00333	1.37206	1.43548e-06	8.66631e-05	Sgsm1	Up	small G protein signaling modulator 1 [Source:MGI Symbol;Acc:MGI:107320]
ENSMUSG00000032690	6.578	3.078	0.999	8.923	8.861	9.787	3.55167	9.19033	1.37162	0.00022869	0.00482644	Oas2	Up	2'-5' oligoadenylate synthetase 2 [Source:MGI Symbol;Acc:MGI:2180852]
ENSMUSG00000009731	2.984	2.037	2.336	6.581	3.172	9.22	2.45233	6.32433	1.36676	4.27153e-05	0.00126215	Kcnd1	Up	potassium voltage-gated channel, Shal-related family, member 1 [Source:MGI Symbol;Acc:MGI:96671]
ENSMUSG00000025020	1.809	1.607	1.888	6.646	2.238	4.789	1.768	4.55767	1.36618	5.00187e-06	0.000233062	Slit1	Up	slit guidance ligand 1 [Source:MGI Symbol;Acc:MGI:1315203]
ENSMUSG00000029596	1.598	1.804	1.896	6.319	4.355	2.969	1.766	4.54767	1.36464	0.00116579	0.0169478	Sdsl	Up	serine dehydratase-like [Source:MGI Symbol;Acc:MGI:2182607]
ENSMUSG00000053825	0.926	0.655	1.178	4.402	1.1	1.585	0.919667	2.36233	1.36103	0.00253106	0.0300225	Ppfia2	Up	protein tyrosine phosphatase, receptor type, f polypeptide (PTPRF), interacting protein (liprin), alpha 2 [Source:MGI Symbol;Acc:MGI:2443834]
ENSMUSG00000034227	2.705	4.624	6.346	16.811	9.862	8.444	4.55833	11.7057	1.36063	3.62161e-05	0.0010987	Foxj1	Up	forkhead box J1 [Source:MGI Symbol;Acc:MGI:1347474]
ENSMUSG00000040724	4.801	2.75	2.921	16.939	4.866	5.068	3.49067	8.95767	1.35962	7.37534e-05	0.00195371	Kcna2	Up	potassium voltage-gated channel, shaker-related subfamily, member 2 [Source:MGI Symbol;Acc:MGI:96659]
ENSMUSG00000036306	0.609	0.768	0.77	2.407	1.283	1.818	0.715667	1.836	1.35921	0.000160603	0.00365266	Lzts1	Up	leucine zipper, putative tumor suppressor 1 [Source:MGI Symbol;Acc:MGI:2684762]
ENSMUSG00000032890	2.85	3.644	3.502	12.393	5.688	7.542	3.332	8.541	1.35802	4.27042e-08	4.85013e-06	Rims3	Up	regulating synaptic membrane exocytosis 3 [Source:MGI Symbol;Acc:MGI:2443331]
ENSMUSG00000021061	3.012	2.769	2.658	12.836	5.282	3.495	2.813	7.20433	1.35676	1.7053e-05	0.000617304	Sptb	Up	spectrin beta, erythrocytic [Source:MGI Symbol;Acc:MGI:98387]
ENSMUSG00000044628	6.79	6.888	9.123	35.526	13.883	8.875	7.60033	19.428	1.354	0.000213828	0.00459301	Rnf208	Up	ring finger protein 208 [Source:MGI Symbol;Acc:MGI:1916096]
ENSMUSG00000003863	3.074	3.241	2.442	12.327	5.337	4.686	2.919	7.45	1.35177	2.69987e-06	0.000144726	Ppfia3	Up	protein tyrosine phosphatase, receptor type, f polypeptide (PTPRF), interacting protein (liprin), alpha 3 [Source:MGI Symbol;Acc:MGI:1924037]
ENSMUSG00000038700	2.453	2.154	2.493	10.328	4.262	3.52	2.36667	6.03667	1.3509	0.000480535	0.0086514	Hoxb5	Up	homeobox B5 [Source:MGI Symbol;Acc:MGI:96186]
ENSMUSG00000052949	10.832	11.465	11.305	50.091	18.68	16.479	11.2007	28.4167	1.34315	2.08939e-06	0.000116468	Rnf157	Up	ring finger protein 157 [Source:MGI Symbol;Acc:MGI:2442484]
ENSMUSG00000020135	4.888	3.275	3.723	16.581	7.408	6.139	3.962	10.0427	1.34184	1.41685e-06	8.5848e-05	Apc2	Up	APC regulator of WNT signaling pathway 2 [Source:MGI Symbol;Acc:MGI:1346052]
ENSMUSG00000022595	5.245	3.094	3.768	6.358	14.749	9.537	4.03567	10.2147	1.33976	0.00354004	0.0386596	Lypd2	Up	Ly6/Plaur domain containing 2 [Source:MGI Symbol;Acc:MGI:1915561]
ENSMUSG00000030413	5.816	5.064	4.333	14.448	16.353	7.69	5.071	12.8303	1.33922	0.000233545	0.00491036	Pglyrp1	Up	peptidoglycan recognition protein 1 [Source:MGI Symbol;Acc:MGI:1345092]
ENSMUSG00000032661	3.758	3.29	0.978	5.477	6.52	8.261	2.67533	6.75267	1.33574	0.00013872	0.00325687	Oas3	Up	2'-5' oligoadenylate synthetase 3 [Source:MGI Symbol;Acc:MGI:2180850]
ENSMUSG00000046709	6.29	6.68	5.473	28.472	8.394	9.612	6.14767	15.4927	1.33347	3.527e-05	0.00108265	Mapk10	Up	mitogen-activated protein kinase 10 [Source:MGI Symbol;Acc:MGI:1346863]
ENSMUSG00000058248	0.615	0.749	0.781	2.905	0.881	1.619	0.715	1.80167	1.33332	0.000888974	0.0138393	Kcnh1	Up	potassium voltage-gated channel, subfamily H (eag-related), member 1 [Source:MGI Symbol;Acc:MGI:1341721]
ENSMUSG00000044005	1.348	3.03	1.945	9.964	3.752	2.191	2.10767	5.30233	1.33098	0.000716987	0.011706	Gls2	Up	glutaminase 2 (liver, mitochondrial) [Source:MGI Symbol;Acc:MGI:2143539]
ENSMUSG00000029561	57.53	37.995	17.684	111.347	82.469	90.467	37.7363	94.761	1.32834	3.59117e-06	0.000177095	Oasl2	Up	2'-5' oligoadenylate synthetase-like 2 [Source:MGI Symbol;Acc:MGI:1344390]
ENSMUSG00000042873	5.164	4.214	2.75	14.903	5.496	10.012	4.04267	10.137	1.32625	8.40015e-06	0.000355822	Lhfpl4	Up	lipoma HMGIC fusion partner-like protein 4 [Source:MGI Symbol;Acc:MGI:3057108]
ENSMUSG00000066366	5.835	3.638	3.568	9.008	13.395	10.277	4.347	10.8933	1.32535	2.31766e-05	0.000777057	Serpina1a	Up	serine (or cysteine) peptidase inhibitor, clade A, member 1A [Source:MGI Symbol;Acc:MGI:891971]
ENSMUSG00000037196	2.239	1.537	3.131	9.009	4.02	4.221	2.30233	5.75	1.32047	0.00159715	0.021247	Pacrg	Up	PARK2 co-regulated [Source:MGI Symbol;Acc:MGI:1916560]
ENSMUSG00000001281	7.978	10.912	9.886	12.49	25.693	33.629	9.592	23.9373	1.31936	5.99498e-05	0.00166576	Itgb7	Up	integrin beta 7 [Source:MGI Symbol;Acc:MGI:96616]
ENSMUSG00000026424	47.223	57.255	51.35	240.284	97.016	51.198	51.9427	129.499	1.31795	0.000100716	0.00253034	Gpr37l1	Up	G protein-coupled receptor 37-like 1 [Source:MGI Symbol;Acc:MGI:1928503]
ENSMUSG00000064246	24.805	18.29	15.064	72.695	41.891	30.313	19.3863	48.2997	1.31697	6.14335e-08	6.49052e-06	Chi3l1	Up	chitinase 3 like 1 [Source:MGI Symbol;Acc:MGI:1340899]
ENSMUSG00000023266	2.567	6.061	3.206	16.283	6.104	7.08	3.94467	9.82233	1.31616	5.62795e-05	0.00159549	Frs3	Up	fibroblast growth factor receptor substrate 3 [Source:MGI Symbol;Acc:MGI:2135965]
ENSMUSG00000020297	12.846	16.014	14.251	58.39	25.305	23.587	14.3703	35.7607	1.31528	1.15776e-06	7.33061e-05	Nsg2	Up	neuron specific gene family member 2 [Source:MGI Symbol;Acc:MGI:1202070]
ENSMUSG00000002032	3.784	2.261	2.554	12.08	4.74	4.578	2.86633	7.13267	1.31524	3.66485e-08	4.35279e-06	Tmem25	Up	transmembrane protein 25 [Source:MGI Symbol;Acc:MGI:1918937]
ENSMUSG00000018822	6.566	4.117	5.2	9.092	15.606	14.7	5.29433	13.1327	1.31064	1.00552e-05	0.000407964	Sfrp5	Up	secreted frizzled-related sequence protein 5 [Source:MGI Symbol;Acc:MGI:1860298]
ENSMUSG00000038319	3.683	3.182	3.246	15.599	4.681	4.779	3.37033	8.353	1.3094	0.000422739	0.00788708	Kcnh2	Up	potassium voltage-gated channel, subfamily H (eag-related), member 2 [Source:MGI Symbol;Acc:MGI:1341722]
ENSMUSG00000010476	0.947	1.18	2.18	5.759	2.255	2.66	1.43567	3.558	1.30935	0.000912696	0.0140913	Ebf3	Up	early B cell factor 3 [Source:MGI Symbol;Acc:MGI:894289]
ENSMUSG00000034799	2.14	2.043	1.107	6.93	2.975	3.19	1.76333	4.365	1.30768	2.22917e-05	0.000754347	Unc13a	Up	unc-13 homolog A [Source:MGI Symbol;Acc:MGI:3051532]
ENSMUSG00000022340	2.734	3.434	4.675	15.264	5.827	5.739	3.61433	8.94333	1.30708	0.000368729	0.00703839	Sybu	Up	syntabulin (syntaxin-interacting) [Source:MGI Symbol;Acc:MGI:2442392]
ENSMUSG00000039518	1.005	0.677	1.043	2.977	2.1	1.661	0.908333	2.246	1.30606	0.00135128	0.0188164	Cdsn	Up	corneodesmosin [Source:MGI Symbol;Acc:MGI:3505689]
ENSMUSG00000006575	23.454	24.487	23.843	87.239	45.6	44.325	23.928	59.0547	1.30335	1.61837e-09	3.30438e-07	Rundc3a	Up	RUN domain containing 3A [Source:MGI Symbol;Acc:MGI:1858752]
ENSMUSG00000024862	17.517	15.079	15.107	61.92	27.365	28.415	15.901	39.2333	1.30296	7.48399e-08	7.55551e-06	Klc2	Up	kinesin light chain 2 [Source:MGI Symbol;Acc:MGI:107953]
ENSMUSG00000029001	12.768	8.478	9.225	44.932	19.056	11.165	10.157	25.051	1.30239	0.000200739	0.00438755	Fbxo44	Up	F-box protein 44 [Source:MGI Symbol;Acc:MGI:1354744]
ENSMUSG00000116165	4.585	5.212	5.098	20.467	9.044	7.112	4.965	12.2077	1.29792	5.77255e-05	0.00162097	Pdxp	Up	pyridoxal (pyridoxine, vitamin B6) phosphatase [Source:MGI Symbol;Acc:MGI:1919282]
ENSMUSG00000022199	24.429	20.908	22.59	93.337	44.009	29.582	22.6423	55.6427	1.29717	2.61747e-06	0.000141142	Slc22a17	Up	solute carrier family 22 (organic cation transporter), member 17 [Source:MGI Symbol;Acc:MGI:1926225]
ENSMUSG00000052584	5.482	6.429	8.993	25.911	12.157	13.197	6.968	17.0883	1.2942	0.000106115	0.00262713	Serp2	Up	stress-associated endoplasmic reticulum protein family member 2 [Source:MGI Symbol;Acc:MGI:1919911]
ENSMUSG00000033676	2.431	2.983	2.906	13.204	3.904	3.268	2.77333	6.792	1.29222	0.000541551	0.00944906	Gabrb3	Up	GABRB3, gamma-aminobutyric acid type A receptor subunit beta 3 [Source:MGI Symbol;Acc:MGI:95621]
ENSMUSG00000048022	5.265	4.924	4.477	23.356	5.472	7.055	4.88867	11.961	1.29083	0.00039398	0.00744996	Tmem229a	Up	transmembrane protein 229A [Source:MGI Symbol;Acc:MGI:2442812]
ENSMUSG00000037872	30.815	25.943	20.658	67.325	66.122	55.939	25.8053	63.1287	1.29063	5.52738e-12	2.64325e-09	Ackr1	Up	atypical chemokine receptor 1 (Duffy blood group) [Source:MGI Symbol;Acc:MGI:1097689]
ENSMUSG00000020638	7.951	6.022	3.792	20.802	11.375	11.258	5.92167	14.4783	1.28982	8.46407e-07	5.73914e-05	Cmpk2	Up	cytidine/uridine monophosphate kinase 2 [Source:MGI Symbol;Acc:MGI:99830]
ENSMUSG00000010064	14.018	13.682	18.694	66.463	29.099	17.773	15.4647	37.7783	1.28858	5.25486e-05	0.00150617	Slc38a3	Up	solute carrier family 38, member 3 [Source:MGI Symbol;Acc:MGI:1923507]
ENSMUSG00000045608	2.722	3.637	4.749	15.782	7.21	4.088	3.70267	9.02667	1.28563	0.000592984	0.0100991	Dbx2	Up	developing brain homeobox 2 [Source:MGI Symbol;Acc:MGI:107445]
ENSMUSG00000028542	24.324	22.241	30.194	105.277	54.48	27.34	25.5863	62.3657	1.28538	2.34367e-05	0.000781451	Slc6a9	Up	solute carrier family 6 (neurotransmitter transporter, glycine), member 9 [Source:MGI Symbol;Acc:MGI:95760]
ENSMUSG00000026824	1.359	0.9	1.234	5.12	2.241	1.121	1.16433	2.82733	1.27994	0.000587406	0.0100229	Kcnj3	Up	potassium inwardly-rectifying channel, subfamily J, member 3 [Source:MGI Symbol;Acc:MGI:104742]
ENSMUSG00000006675	8.363	7.986	6.68	28.758	13.872	13.277	7.67633	18.6357	1.27958	1.39793e-06	8.55328e-05	P4htm	Up	prolyl 4-hydroxylase, transmembrane (endoplasmic reticulum) [Source:MGI Symbol;Acc:MGI:1921693]
ENSMUSG00000039485	18.699	19.025	17.302	82.407	25.304	25.431	18.342	44.3807	1.27478	5.08253e-05	0.00146836	Tspyl4	Up	TSPY-like 4 [Source:MGI Symbol;Acc:MGI:106393]
ENSMUSG00000020882	2.881	3.184	3.835	12.148	5.499	6.254	3.3	7.967	1.27157	6.84214e-07	4.76381e-05	Cacnb1	Up	calcium channel, voltage-dependent, beta 1 subunit [Source:MGI Symbol;Acc:MGI:102522]
ENSMUSG00000049436	1.937	0.778	1.814	2.36	5.182	3.381	1.50967	3.641	1.2701	0.00410431	0.0432619	Upk1b	Up	uroplakin 1B [Source:MGI Symbol;Acc:MGI:98912]
ENSMUSG00000027560	3.736	4.488	5.223	15.443	10.641	6.339	4.48233	10.8077	1.26973	4.49959e-05	0.00132308	Dok5	Up	docking protein 5 [Source:MGI Symbol;Acc:MGI:1924079]
ENSMUSG00000022240	5.87	6.077	6.793	27.881	9.998	7.281	6.24667	15.0533	1.26892	0.000225215	0.00475884	Ctnnd2	Up	catenin delta 2 [Source:MGI Symbol;Acc:MGI:1195966]
ENSMUSG00000030994	0.995	1.159	1.556	4.851	2.168	1.921	1.23667	2.98	1.26886	0.000613516	0.0104195	D7Ertd443e	Up	DNA segment, Chr 7, ERATO Doi 443, expressed [Source:MGI Symbol;Acc:MGI:1196431]
ENSMUSG00000025738	4.978	5.069	6.893	21.295	9.67	9.798	5.64667	13.5877	1.26683	2.0154e-06	0.000113387	Fbxl16	Up	F-box and leucine-rich repeat protein 16 [Source:MGI Symbol;Acc:MGI:2448488]
ENSMUSG00000067279	11.177	14.227	13.28	54.042	22.25	16.713	12.8947	31.0017	1.26557	3.31265e-05	0.00103078	Ppp1r3c	Up	protein phosphatase 1, regulatory subunit 3C [Source:MGI Symbol;Acc:MGI:1858229]
ENSMUSG00000043263	2.272	2.805	4.219	8.492	5.933	7.918	3.09867	7.44767	1.26514	0.000650886	0.0109416	Ifi209	Up	interferon activated gene 209 [Source:MGI Symbol;Acc:MGI:2138243]
ENSMUSG00000033717	3.191	3.023	3.604	13.313	6.166	4.073	3.27267	7.85067	1.26235	0.000131318	0.00312345	Adra2a	Up	adrenergic receptor, alpha 2a [Source:MGI Symbol;Acc:MGI:87934]
ENSMUSG00000026527	3.658	2.701	4.561	15.954	4.529	5.703	3.64	8.72867	1.26182	0.000407755	0.00765467	Rgs7	Up	regulator of G protein signaling 7 [Source:MGI Symbol;Acc:MGI:1346089]
ENSMUSG00000020785	3.808	3.84	3.419	15.136	6.928	4.416	3.689	8.82667	1.25864	4.87193e-05	0.00141879	Camkk1	Up	calcium/calmodulin-dependent protein kinase kinase 1, alpha [Source:MGI Symbol;Acc:MGI:1891766]
ENSMUSG00000066363	1.607	1.719	1.205	2.304	3.96	4.565	1.51033	3.60967	1.257	0.00156012	0.0208154	Serpina3f	Up	serine (or cysteine) peptidase inhibitor, clade A, member 3F [Source:MGI Symbol;Acc:MGI:2182838]
ENSMUSG00000087141	2.45	2.207	1.94	10.676	2.277	2.803	2.199	5.252	1.25602	0.00177199	0.0230664	Plcxd2	Up	phosphatidylinositol-specific phospholipase C, X domain containing 2 [Source:MGI Symbol;Acc:MGI:3647874]
ENSMUSG00000063142	1.299	1.333	1.213	5.506	1.714	1.957	1.28167	3.059	1.25504	1.74344e-06	0.000101544	Kcnma1	Up	potassium large conductance calcium-activated channel, subfamily M, alpha member 1 [Source:MGI Symbol;Acc:MGI:99923]
ENSMUSG00000036745	12.868	11.079	7.881	42.496	10.6	22.794	10.6093	25.2967	1.25361	3.24915e-05	0.00101624	Ttll7	Up	tubulin tyrosine ligase-like family, member 7 [Source:MGI Symbol;Acc:MGI:1918142]
ENSMUSG00000024399	1.582	2.443	3.24	5.095	5.641	6.518	2.42167	5.75133	1.2479	0.00321537	0.0359346	Ltb	Up	lymphotoxin B [Source:MGI Symbol;Acc:MGI:104796]
ENSMUSG00000033029	3.996	3.13	4.874	9.945	11.79	6.744	4	9.493	1.24686	0.000893459	0.013865	1700088E04Rik	Up	RIKEN cDNA 1700088E04 gene [Source:MGI Symbol;Acc:MGI:1920774]
ENSMUSG00000073411	789.064	829.45	911.65	1589.57	2110.05	2301.59	843.388	2000.41	1.24602	1.26889e-08	1.82057e-06	H2-D1	Up	histocompatibility 2, D region locus 1 [Source:MGI Symbol;Acc:MGI:95896]
ENSMUSG00000074657	30.664	35.562	26.019	119.715	42.767	56.143	30.7483	72.875	1.24492	2.16875e-06	0.000119789	Kif5a	Up	kinesin family member 5A [Source:MGI Symbol;Acc:MGI:109564]
ENSMUSG00000020083	2.475	2.889	2.027	7.08	5.451	4.978	2.46367	5.83633	1.24426	0.00128395	0.0181572	Fam241b	Up	family with sequence similarity 241, member B [Source:MGI Symbol;Acc:MGI:1917144]
ENSMUSG00000062151	1.252	1.108	1.734	6.222	1.616	1.851	1.36467	3.22967	1.24284	0.00188801	0.0242137	Unc13c	Up	unc-13 homolog C [Source:MGI Symbol;Acc:MGI:2149021]
ENSMUSG00000030688	16.156	15.279	12.703	48.004	31.959	24.457	14.7127	34.8067	1.2423	3.41185e-09	6.52634e-07	Stard10	Up	StAR related lipid transfer domain containing 10 [Source:MGI Symbol;Acc:MGI:1860093]
ENSMUSG00000033880	209.407	154.623	124.195	304.5	422.298	427.518	162.742	384.772	1.24142	1.41726e-06	8.5848e-05	Lgals3bp	Up	lectin, galactoside-binding, soluble, 3 binding protein [Source:MGI Symbol;Acc:MGI:99554]
ENSMUSG00000021719	4.494	3.636	4.264	16.507	3.959	8.773	4.13133	9.74633	1.23825	0.000214441	0.00459303	Rgs7bp	Up	regulator of G-protein signalling 7 binding protein [Source:MGI Symbol;Acc:MGI:106334]
ENSMUSG00000037386	1.562	2.082	1.987	8.407	2.216	2.658	1.877	4.427	1.2379	0.00316636	0.035496	Rims2	Up	regulating synaptic membrane exocytosis 2 [Source:MGI Symbol;Acc:MGI:2152972]
ENSMUSG00000024371	13.39	11.375	10.137	16.97	32.17	33.143	11.634	27.4277	1.23728	6.1131e-06	0.000272942	C2	Up	complement C2 [Source:MGI Symbol;Acc:MGI:88226]
ENSMUSG00000032278	4.077	2.34	2.711	7.453	5.014	9.049	3.04267	7.172	1.23704	5.71543e-05	0.00161525	Paqr5	Up	progestin and adipoQ receptor family member V [Source:MGI Symbol;Acc:MGI:1921340]
ENSMUSG00000039611	8.64	8.331	9.963	30.72	16.226	16.295	8.978	21.0803	1.23143	9.63315e-06	0.000395155	Pgap4	Up	post-GPI attachment to proteins GalNAc transferase 4 [Source:MGI Symbol;Acc:MGI:1914313]
ENSMUSG00000036570	54.384	44.565	40.397	143.228	99.406	83.651	46.4487	108.762	1.22746	6.12096e-10	1.61203e-07	Fxyd1	Up	FXYD domain-containing ion transport regulator 1 [Source:MGI Symbol;Acc:MGI:1889273]
ENSMUSG00000038390	3.731	4.786	3.574	15.973	7.279	5.01	4.03033	9.42067	1.22493	0.000243777	0.00506855	Gpr162	Up	G protein-coupled receptor 162 [Source:MGI Symbol;Acc:MGI:1315214]
ENSMUSG00000040037	2.579	2.775	2.63	11.71	3.505	3.446	2.66133	6.22033	1.22484	0.000704883	0.0115814	Negr1	Up	neuronal growth regulator 1 [Source:MGI Symbol;Acc:MGI:2444846]
ENSMUSG00000110332	2.374	4.632	4.607	11.476	8.668	6.996	3.871	9.04667	1.22468	0.00109007	0.0162109	Gm19935	Up	predicted gene, 19935 [Source:MGI Symbol;Acc:MGI:5012120]
ENSMUSG00000027656	7.542	7.848	8.246	14.337	18.022	22.768	7.87867	18.3757	1.22177	5.77992e-06	0.000261245	Ccn5	Up	cellular communication network factor 5 [Source:MGI Symbol;Acc:MGI:1328326]
ENSMUSG00000052364	4.167	4.169	5.737	19.971	6.887	5.958	4.691	10.9387	1.22147	0.000826395	0.0130812	B630019K06Rik	Up	RIKEN cDNA B630019K06 gene [Source:MGI Symbol;Acc:MGI:2147918]
ENSMUSG00000022587	404.435	321.047	288.689	637.314	815.489	909.308	338.057	787.37	1.21978	7.90717e-09	1.22811e-06	Ly6e	Up	lymphocyte antigen 6 family member E [Source:MGI Symbol;Acc:MGI:106651]
ENSMUSG00000070304	2.391	3.603	2.791	11.884	4.699	3.878	2.92833	6.82033	1.21976	0.000289332	0.0058298	Scn2b	Up	sodium channel, voltage-gated, type II, beta [Source:MGI Symbol;Acc:MGI:106921]
ENSMUSG00000015377	1.098	1.209	1.063	3.852	2.067	1.928	1.12333	2.61567	1.21939	0.000225026	0.00475884	Dennd6b	Up	DENN domain containing 6B [Source:MGI Symbol;Acc:MGI:1916690]
ENSMUSG00000053046	6.169	4.443	3.537	18.574	6.877	7.469	4.71633	10.9733	1.21826	4.21996e-06	0.000202248	Brsk2	Up	BR serine/threonine kinase 2 [Source:MGI Symbol;Acc:MGI:1923020]
ENSMUSG00000043384	14.828	12.794	12.762	60.936	17.745	15.136	13.4613	31.2723	1.21607	0.000715699	0.0116958	Gprasp1	Up	G protein-coupled receptor associated sorting protein 1 [Source:MGI Symbol;Acc:MGI:1917418]
ENSMUSG00000041378	69.364	85.101	100.408	191.449	208.385	191.971	84.9577	197.268	1.21534	4.85106e-09	8.08747e-07	Cldn5	Up	claudin 5 [Source:MGI Symbol;Acc:MGI:1276112]
ENSMUSG00000029408	2.94	3.406	3.139	11.078	6.172	4.769	3.16167	7.33967	1.21503	1.10323e-05	0.000439647	Abcb9	Up	ATP-binding cassette, sub-family B member 9 [Source:MGI Symbol;Acc:MGI:1861729]
ENSMUSG00000029651	1.048	0.839	0.577	3.116	1.156	1.448	0.821333	1.90667	1.21501	0.00014851	0.00342914	Mtus2	Up	microtubule associated tumor suppressor candidate 2 [Source:MGI Symbol;Acc:MGI:1915388]
ENSMUSG00000044550	14.456	18.67	13.501	57.029	29.699	21.409	15.5423	36.0457	1.21362	5.47262e-05	0.0015612	Tceal3	Up	transcription elongation factor A (SII)-like 3 [Source:MGI Symbol;Acc:MGI:1913354]
ENSMUSG00000004951	201.412	162.188	189.776	471.725	478.703	331.848	184.459	427.425	1.21237	7.35014e-13	5.34267e-10	Hspb1	Up	heat shock protein 1 [Source:MGI Symbol;Acc:MGI:96240]
ENSMUSG00000015476	3.72	4.675	5.148	15.319	9.961	6.098	4.51433	10.4593	1.21221	8.60799e-05	0.00221564	Prrt1	Up	proline-rich transmembrane protein 1 [Source:MGI Symbol;Acc:MGI:1932118]
ENSMUSG00000036814	12.535	6.761	9.403	19.014	22.079	25.394	9.56633	22.1623	1.21207	1.17714e-06	7.42743e-05	Slc6a20a	Up	solute carrier family 6 (neurotransmitter transporter), member 20A [Source:MGI Symbol;Acc:MGI:2143217]
ENSMUSG00000041658	5.932	6.598	6.641	28.415	8.513	7.449	6.39033	14.7923	1.21089	0.00102128	0.0154234	Rragb	Up	Ras-related GTP binding B [Source:MGI Symbol;Acc:MGI:3038613]
ENSMUSG00000000792	1.922	0.736	1.357	4.827	1.955	2.491	1.33833	3.091	1.20764	0.00320599	0.0358519	Slc5a5	Up	solute carrier family 5 (sodium iodide symporter), member 5 [Source:MGI Symbol;Acc:MGI:2149330]
ENSMUSG00000033152	17.116	20.551	19.769	66.256	36.842	29.427	19.1453	44.175	1.20624	3.98547e-07	3.04302e-05	Podxl2	Up	podocalyxin-like 2 [Source:MGI Symbol;Acc:MGI:2442488]
ENSMUSG00000102697	2.034	1.282	1.81	6.22	2.05	3.543	1.70867	3.93767	1.20447	0.000298806	0.00596039	Pcdhac2	Up	protocadherin alpha subfamily C, 2 [Source:MGI Symbol;Acc:MGI:1891443]
ENSMUSG00000074923	0.803	0.997	1.498	4.179	2.341	1.075	1.09933	2.53167	1.20346	0.00359903	0.0390924	Pak6	Up	p21 (RAC1) activated kinase 6 [Source:MGI Symbol;Acc:MGI:2679420]
ENSMUSG00000021062	11.805	10.575	8.875	34.541	16.329	21.012	10.4183	23.9607	1.20154	1.10293e-08	1.60339e-06	Rab15	Up	RAB15, member RAS oncogene family [Source:MGI Symbol;Acc:MGI:1916865]
ENSMUSG00000034245	15.168	16.75	16.879	64.659	26.052	21.491	16.2657	37.4007	1.20123	3.19246e-05	0.00100196	Hdac11	Up	histone deacetylase 11 [Source:MGI Symbol;Acc:MGI:2385252]
ENSMUSG00000031343	3.474	3.839	3.207	16.165	4.3	3.716	3.50667	8.06033	1.20074	0.00219321	0.027057	Gabra3	Up	gamma-aminobutyric acid type A receptor subunit alpha 3 [Source:MGI Symbol;Acc:MGI:95615]
ENSMUSG00000039717	3.168	5.708	3.727	16.352	5.918	6.664	4.201	9.64467	1.199	9.37299e-06	0.000388027	Ralyl	Up	RALY RNA binding protein-like [Source:MGI Symbol;Acc:MGI:1924147]
ENSMUSG00000034958	7.53	7.646	6.841	27.065	11.521	11.904	7.339	16.83	1.19738	3.83103e-06	0.000186642	Atcay	Up	ataxia, cerebellar, Cayman type [Source:MGI Symbol;Acc:MGI:2448730]
ENSMUSG00000019888	1.172	0.867	1.155	4.476	1.978	0.869	1.06467	2.441	1.19707	0.00407709	0.0430249	Mgat4c	Up	MGAT4 family, member C [Source:MGI Symbol;Acc:MGI:1914819]
ENSMUSG00000042763	4.62	3.367	4.607	15.372	6.711	6.785	4.198	9.62267	1.19673	6.15431e-05	0.00170222	Maneal	Up	mannosidase, endo-alpha-like [Source:MGI Symbol;Acc:MGI:2684896]
ENSMUSG00000055373	1.129	0.831	0.991	4.59	1.121	1.048	0.983667	2.253	1.19561	0.00405258	0.0428409	Fut9	Up	fucosyltransferase 9 [Source:MGI Symbol;Acc:MGI:1330859]
ENSMUSG00000031872	4.195	2.512	2.607	9.2	5.951	6.154	3.10467	7.10167	1.19372	5.15407e-07	3.77661e-05	Bean1	Up	brain expressed, associated with Nedd4, 1 [Source:MGI Symbol;Acc:MGI:1929597]
ENSMUSG00000096727	16.058	16.602	15.25	32.344	39.169	37.929	15.97	36.4807	1.19177	7.22939e-08	7.38048e-06	Psmb9	Up	proteasome (prosome, macropain) subunit, beta type 9 (large multifunctional peptidase 2) [Source:MGI Symbol;Acc:MGI:1346526]
ENSMUSG00000046240	18.331	16.928	16.081	67.355	30.645	19.22	17.1133	39.0733	1.19106	2.68643e-05	0.000871747	Hepacam	Up	hepatocyte cell adhesion molecule [Source:MGI Symbol;Acc:MGI:1920177]
ENSMUSG00000023017	3.584	4.218	4.065	13.355	6.765	6.961	3.95567	9.027	1.19033	3.04208e-06	0.000157047	Asic1	Up	acid-sensing ion channel 1 [Source:MGI Symbol;Acc:MGI:1194915]
ENSMUSG00000019923	166.005	169.969	146.58	624.503	249.373	225.458	160.851	366.445	1.18787	3.46023e-06	0.000171333	Zwint	Up	ZW10 interactor [Source:MGI Symbol;Acc:MGI:1289227]
ENSMUSG00000029603	4.062	3.428	5.642	15.359	8.463	6.062	4.37733	9.96133	1.18629	5.82668e-05	0.00162896	Dtx1	Up	deltex 1, E3 ubiquitin ligase [Source:MGI Symbol;Acc:MGI:1352744]
ENSMUSG00000028524	3.726	3.249	6.016	17.512	6.002	6.01	4.33033	9.84133	1.18438	0.00113848	0.0167247	Sgip1	Up	SH3-domain GRB2-like (endophilin) interacting protein 1 [Source:MGI Symbol;Acc:MGI:1920344]
ENSMUSG00000028528	6.894	6.204	5.861	26.24	7.681	9.059	6.31967	14.3267	1.18078	3.78365e-05	0.00113835	Dnajc6	Up	DnaJ heat shock protein family (Hsp40) member C6 [Source:MGI Symbol;Acc:MGI:1919935]
ENSMUSG00000042751	7.932	8.038	8.635	28.7	14.3	12.729	8.20167	18.5763	1.17948	8.26902e-07	5.62789e-05	Nmnat2	Up	nicotinamide nucleotide adenylyltransferase 2 [Source:MGI Symbol;Acc:MGI:2444155]
ENSMUSG00000044703	2.981	2.608	2.225	6.147	5.768	5.773	2.60467	5.896	1.17864	0.000353645	0.00683663	Phf11a	Up	PHD finger protein 11A [Source:MGI Symbol;Acc:MGI:1918441]
ENSMUSG00000057092	25.727	17.233	10.089	19.5	61.538	38.673	17.683	39.9037	1.17416	0.000428761	0.00792618	Fxyd3	Up	FXYD domain-containing ion transport regulator 3 [Source:MGI Symbol;Acc:MGI:107497]
ENSMUSG00000062044	1.56	2.245	1.901	8.291	3.231	1.351	1.902	4.291	1.1738	0.00191503	0.0244382	Lmtk3	Up	lemur tyrosine kinase 3 [Source:MGI Symbol;Acc:MGI:3039582]
ENSMUSG00000022218	16.443	21.214	22.672	76.448	37.435	22.142	20.1097	45.3417	1.17295	6.75097e-05	0.00183102	Tgm1	Up	transglutaminase 1, K polypeptide [Source:MGI Symbol;Acc:MGI:98730]
ENSMUSG00000020435	3.971	3.343	5.298	14.379	8.536	5.513	4.204	9.476	1.17252	0.000300089	0.00597941	Osbp2	Up	oxysterol binding protein 2 [Source:MGI Symbol;Acc:MGI:1921559]
ENSMUSG00000037321	18.239	19.341	16.536	37.658	42.384	41.808	18.0387	40.6167	1.17098	7.38694e-10	1.81399e-07	Tap1	Up	transporter 1, ATP-binding cassette, sub-family B (MDR/TAP) [Source:MGI Symbol;Acc:MGI:98483]
ENSMUSG00000029161	7.125	5.817	6.926	19.939	13.259	11.473	6.62267	14.8903	1.16889	2.92392e-06	0.000152947	Cgref1	Up	cell growth regulator with EF hand domain 1 [Source:MGI Symbol;Acc:MGI:1915817]
ENSMUSG00000033213	13.7	15.546	14.626	25.047	26.38	47.14	14.624	32.8557	1.1678	0.000142705	0.00331813	AA467197	Up	expressed sequence AA467197 [Source:MGI Symbol;Acc:MGI:3034182]
ENSMUSG00000030000	6.111	5.213	6.258	21.24	8.983	9.196	5.86067	13.1397	1.16479	1.0248e-07	9.90563e-06	Add2	Up	adducin 2 [Source:MGI Symbol;Acc:MGI:87919]
ENSMUSG00000020142	10.844	9.143	13.043	39.006	20.08	14.918	11.01	24.668	1.16383	1.17171e-05	0.000459915	Slc1a4	Up	solute carrier family 1 (glutamate/neutral amino acid transporter), member 4 [Source:MGI Symbol;Acc:MGI:2135601]
ENSMUSG00000033355	51.103	41.561	10.649	78.877	74.682	77.774	34.4377	77.111	1.16295	0.000351289	0.00679832	Rtp4	Up	receptor transporter protein 4 [Source:MGI Symbol;Acc:MGI:1915025]
ENSMUSG00000056665	7.473	6.608	7.043	21.331	12.15	13.811	7.04133	15.764	1.16271	1.04522e-06	6.75932e-05	Them6	Up	thioesterase superfamily member 6 [Source:MGI Symbol;Acc:MGI:1925301]
ENSMUSG00000022217	12.16	10.005	11.16	30.78	23.625	20.178	11.1083	24.861	1.16224	1.20765e-06	7.59358e-05	Emc9	Up	ER membrane protein complex subunit 9 [Source:MGI Symbol;Acc:MGI:1934682]
ENSMUSG00000000386	3.707	2.645	2.032	7.574	5.397	5.786	2.79467	6.25233	1.16172	6.91632e-06	0.000298535	Mx1	Up	MX dynamin-like GTPase 1 [Source:MGI Symbol;Acc:MGI:97243]
ENSMUSG00000033981	1.84	1.821	2.685	8.858	3.205	2.107	2.11533	4.72333	1.15892	0.00063762	0.0107785	Gria2	Up	glutamate receptor, ionotropic, AMPA2 (alpha 2) [Source:MGI Symbol;Acc:MGI:95809]
ENSMUSG00000072825	8.306	7.296	8.06	27.619	13.313	11.893	7.88733	17.6083	1.15865	8.61047e-07	5.80973e-05	Cep170b	Up	centrosomal protein 170B [Source:MGI Symbol;Acc:MGI:2145043]
ENSMUSG00000063239	0.69	1.251	2.614	4.877	3.2	2.066	1.51833	3.381	1.15496	0.00247083	0.0294813	Grm4	Up	glutamate receptor, metabotropic 4 [Source:MGI Symbol;Acc:MGI:1351341]
ENSMUSG00000025492	590.65	469.25	411.485	798.434	1231.14	1244.35	490.462	1091.31	1.15384	3.17586e-07	2.54237e-05	Ifitm3	Up	interferon induced transmembrane protein 3 [Source:MGI Symbol;Acc:MGI:1913391]
ENSMUSG00000033900	3.153	1.714	2.178	9.892	2.49	3.29	2.34833	5.224	1.15352	0.00089293	0.013865	Map9	Up	microtubule-associated protein 9 [Source:MGI Symbol;Acc:MGI:2442208]
ENSMUSG00000032735	1.139	1.11	1.154	3.185	2.082	2.301	1.13433	2.52267	1.1531	0.000104662	0.00260786	Ablim3	Up	actin binding LIM protein family, member 3 [Source:MGI Symbol;Acc:MGI:2442582]
ENSMUSG00000026077	1.328	0.83	1.597	4.05	2.148	2.142	1.25167	2.78	1.15123	0.000989281	0.0150689	Npas2	Up	neuronal PAS domain protein 2 [Source:MGI Symbol;Acc:MGI:109232]
ENSMUSG00000051998	0.265	0.521	0.668	0.942	1.284	1.002	0.484667	1.076	1.15061	0.00334497	0.0369737	Lax1	Up	lymphocyte transmembrane adaptor 1 [Source:MGI Symbol;Acc:MGI:2443362]
ENSMUSG00000054072	9.621	9.912	1.936	23.903	9.687	14.003	7.15633	15.8643	1.14849	0.00220373	0.02715	Iigp1	Up	interferon inducible GTPase 1 [Source:MGI Symbol;Acc:MGI:1926259]
ENSMUSG00000047735	11.245	7.572	9.187	25.295	16.42	20.327	9.33467	20.6807	1.14761	9.70676e-09	1.43408e-06	Samd9l	Up	sterile alpha motif domain containing 9-like [Source:MGI Symbol;Acc:MGI:1343184]
ENSMUSG00000004748	3.901	4.74	3.729	14.983	7.681	4.728	4.12333	9.13067	1.14691	0.00162814	0.0216434	Mtfp1	Up	mitochondrial fission process 1 [Source:MGI Symbol;Acc:MGI:1916686]
ENSMUSG00000041556	30.864	32.301	25.679	105.238	46.121	45.304	29.6147	65.5543	1.14638	5.37436e-06	0.000247248	Fbxo2	Up	F-box protein 2 [Source:MGI Symbol;Acc:MGI:2446216]
ENSMUSG00000075318	1.291	1.263	0.902	5.137	1.285	1.209	1.152	2.54367	1.14277	0.00402771	0.0426276	Scn2a	Up	sodium channel, voltage-gated, type II, alpha [Source:MGI Symbol;Acc:MGI:98248]
ENSMUSG00000029121	6.747	7.09	7.649	24.279	11.853	11.135	7.162	15.7557	1.13744	9.83965e-06	0.00040091	Crmp1	Up	collapsin response mediator protein 1 [Source:MGI Symbol;Acc:MGI:107793]
ENSMUSG00000027894	3.378	3.79	4.791	15.276	5.759	5.248	3.98633	8.761	1.13603	0.00032619	0.00641561	Slc6a17	Up	solute carrier family 6 (neurotransmitter transporter), member 17 [Source:MGI Symbol;Acc:MGI:2442535]
ENSMUSG00000066607	6.521	7.264	7.913	23.212	14	10.434	7.23267	15.882	1.13479	1.61632e-05	0.000594581	Insyn1	Up	inhibitory synaptic factor 1 [Source:MGI Symbol;Acc:MGI:2442108]
ENSMUSG00000031762	562.986	632.729	650.615	2022.96	1226.16	799.44	615.443	1349.52	1.13275	6.53344e-07	4.61968e-05	Mt2	Up	metallothionein 2 [Source:MGI Symbol;Acc:MGI:97172]
ENSMUSG00000031765	555.373	653.977	648.32	2206.2	1089.35	776.283	619.223	1357.28	1.13218	8.70234e-06	0.000366063	Mt1	Up	metallothionein 1 [Source:MGI Symbol;Acc:MGI:97171]
ENSMUSG00000021314	8.974	8.621	7.867	29.666	14.424	11.716	8.48733	18.602	1.13207	9.28327e-06	0.000386031	Amph	Up	amphiphysin [Source:MGI Symbol;Acc:MGI:103574]
ENSMUSG00000062184	1.884	1.365	1.514	5.702	1.551	3.171	1.58767	3.47467	1.12997	0.00236951	0.0286719	Hs6st2	Up	heparan sulfate 6-O-sulfotransferase 2 [Source:MGI Symbol;Acc:MGI:1354959]
ENSMUSG00000046093	2.927	3.173	4.377	11.074	7.941	3.896	3.49233	7.637	1.12881	0.000202365	0.00441462	Hpcal4	Up	hippocalcin-like 4 [Source:MGI Symbol;Acc:MGI:2157521]
ENSMUSG00000020657	5.52	5.564	5.242	22.75	6.794	6.146	5.442	11.8967	1.12835	0.000556124	0.00959723	Dnajc27	Up	DnaJ heat shock protein family (Hsp40) member C27 [Source:MGI Symbol;Acc:MGI:2443036]
ENSMUSG00000067786	57.832	49.901	49.712	123.819	119.421	100.379	52.4817	114.54	1.12596	1.88514e-12	1.10506e-09	Nnat	Up	neuronatin [Source:MGI Symbol;Acc:MGI:104716]
ENSMUSG00000026875	2.322	3.356	2.541	5.84	5.895	6.194	2.73967	5.97633	1.12526	0.000687138	0.0113619	Traf1	Up	TNF receptor-associated factor 1 [Source:MGI Symbol;Acc:MGI:101836]
ENSMUSG00000034664	0.996	1.451	1.718	2.531	4.105	2.433	1.38833	3.023	1.12263	0.00175058	0.0228531	Itga2b	Up	integrin alpha 2b [Source:MGI Symbol;Acc:MGI:96601]
ENSMUSG00000037921	1.966	2.717	1.152	4.334	3.424	4.929	1.945	4.229	1.12055	2.05416e-06	0.000114856	Ddx60	Up	DExD/H box helicase 60 [Source:MGI Symbol;Acc:MGI:2384570]
ENSMUSG00000060961	11.838	10.306	12.313	48.544	14.171	12.194	11.4857	24.9697	1.12034	0.00117947	0.0170784	Slc4a4	Up	solute carrier family 4 (anion exchanger), member 4 [Source:MGI Symbol;Acc:MGI:1927555]
ENSMUSG00000053192	35.566	35.829	26.296	120.645	45.939	45.236	32.5637	70.6067	1.11654	2.47405e-05	0.000818914	Mllt11	Up	myeloid/lymphoid or mixed-lineage leukemia; translocated to, 11 [Source:MGI Symbol;Acc:MGI:1929671]
ENSMUSG00000025408	33.223	34.538	20.975	79.405	58.74	54.233	29.5787	64.126	1.11635	8.58074e-09	1.32143e-06	Ddit3	Up	DNA-damage inducible transcript 3 [Source:MGI Symbol;Acc:MGI:109247]
ENSMUSG00000022489	10.523	11.535	12.86	40.381	21.767	13.471	11.6393	25.2063	1.11478	3.95858e-05	0.00117783	Pde1b	Up	phosphodiesterase 1B, Ca2+-calmodulin dependent [Source:MGI Symbol;Acc:MGI:97523]
ENSMUSG00000055629	1.018	1.69	1.842	5.096	2.099	2.651	1.51667	3.282	1.11367	0.00327547	0.0363929	B4galnt4	Up	beta-1,4-N-acetyl-galactosaminyl transferase 4 [Source:MGI Symbol;Acc:MGI:2652891]
ENSMUSG00000025964	8.297	7.19	8.374	29.937	10.906	10.781	7.95367	17.208	1.11339	2.9044e-06	0.00015254	Adam23	Up	a disintegrin and metallopeptidase domain 23 [Source:MGI Symbol;Acc:MGI:1345162]
ENSMUSG00000026921	66.354	64.501	73.974	122.157	148.187	172.698	68.2763	147.681	1.11302	4.95106e-07	3.64254e-05	Egfl7	Up	EGF-like domain 7 [Source:MGI Symbol;Acc:MGI:2449923]
ENSMUSG00000000938	1.941	4.876	3.789	12.218	5.015	5.67	3.53533	7.63433	1.11066	0.0017273	0.0226469	Hoxa10	Up	homeobox A10 [Source:MGI Symbol;Acc:MGI:96171]
ENSMUSG00000045790	4.343	4.175	3.292	13.177	6.767	5.55	3.93667	8.498	1.11015	0.000897403	0.0139045	Ccdc149	Up	coiled-coil domain containing 149 [Source:MGI Symbol;Acc:MGI:2685293]
ENSMUSG00000030246	133.851	121.49	128.341	449.725	225.887	150.918	127.894	275.51	1.10716	1.0517e-05	0.000420959	Ldhb	Up	lactate dehydrogenase B [Source:MGI Symbol;Acc:MGI:96763]
ENSMUSG00000068740	4.736	4.287	6.295	17.384	9.002	6.577	5.106	10.9877	1.10562	0.000115907	0.00281587	Celsr2	Up	cadherin, EGF LAG seven-pass G-type receptor 2 [Source:MGI Symbol;Acc:MGI:1858235]
ENSMUSG00000052776	50.86	43.419	26.82	77.592	82.4	100.474	40.3663	86.822	1.10491	1.28686e-06	8.00848e-05	Oas1a	Up	2'-5' oligoadenylate synthetase 1A [Source:MGI Symbol;Acc:MGI:2180860]
ENSMUSG00000032503	2.145	1.63	2.393	7.472	2.765	3.001	2.056	4.41267	1.10181	0.000759122	0.0122362	Arpp21	Up	cyclic AMP-regulated phosphoprotein, 21 [Source:MGI Symbol;Acc:MGI:107562]
ENSMUSG00000039716	5.545	4.088	5.467	12.019	6.293	14.039	5.03333	10.7837	1.09926	0.000156011	0.00357938	Dock3	Up	dedicator of cyto-kinesis 3 [Source:MGI Symbol;Acc:MGI:2429763]
ENSMUSG00000041609	5.668	4.095	3.797	16.22	5.798	7.007	4.52	9.675	1.09794	0.00307908	0.034775	Bicdl1	Up	BICD family like cargo adaptor 1 [Source:MGI Symbol;Acc:MGI:1922915]
ENSMUSG00000032087	0.949	0.533	0.998	2.105	2.037	1.163	0.826667	1.76833	1.09701	0.00124923	0.0177703	Dscaml1	Up	DS cell adhesion molecule like 1 [Source:MGI Symbol;Acc:MGI:2150309]
ENSMUSG00000040253	9.049	7.094	5.021	21.72	11.449	12.057	7.05467	15.0753	1.09554	3.6637e-08	4.35279e-06	Gbp7	Up	guanylate binding protein 7 [Source:MGI Symbol;Acc:MGI:2444421]
ENSMUSG00000041078	1.24	1.229	1.521	4.963	1.948	1.602	1.33	2.83767	1.09328	0.00267146	0.0312996	Grid1	Up	glutamate receptor, ionotropic, delta 1 [Source:MGI Symbol;Acc:MGI:95812]
ENSMUSG00000046442	3.066	2.573	2.471	10.892	2.885	3.491	2.70333	5.756	1.09033	0.00210697	0.0262425	Ppm1e	Up	protein phosphatase 1E (PP2C domain containing) [Source:MGI Symbol;Acc:MGI:2444096]
ENSMUSG00000029167	1.321	1.139	1.488	5.524	1.349	1.53	1.316	2.801	1.08978	0.00270503	0.0315304	Ppargc1a	Up	peroxisome proliferative activated receptor, gamma, coactivator 1 alpha [Source:MGI Symbol;Acc:MGI:1342774]
ENSMUSG00000059108	9.605	5.414	4.193	8.812	19.28	12.682	6.404	13.5913	1.08564	0.00398324	0.0423295	Ifitm6	Up	interferon induced transmembrane protein 6 [Source:MGI Symbol;Acc:MGI:2686976]
ENSMUSG00000063297	8.91	7.124	9.027	34.288	8.887	10	8.35367	17.725	1.0853	0.00195379	0.0248643	Luzp2	Up	leucine zipper protein 2 [Source:MGI Symbol;Acc:MGI:1889615]
ENSMUSG00000005986	3.949	5.632	3.066	11.073	7.317	8.411	4.21567	8.93367	1.08349	3.96024e-05	0.00117783	Ankrd13d	Up	ankyrin repeat domain 13 family, member D [Source:MGI Symbol;Acc:MGI:1915673]
ENSMUSG00000019796	13.131	10.539	10.745	36.711	15.185	20.867	11.4717	24.2543	1.08017	2.9732e-05	0.000944562	Lrp11	Up	low density lipoprotein receptor-related protein 11 [Source:MGI Symbol;Acc:MGI:2442989]
ENSMUSG00000121926	2.132	2.718	2.487	8.68	3.592	3.236	2.44567	5.16933	1.07975	0.00135618	0.0188413	-	Up	novel protein
ENSMUSG00000059540	3.729	2.491	3.909	8.374	6.475	6.545	3.37633	7.13133	1.07871	0.00123758	0.017681	Tcea2	Up	transcription elongation factor A (SII), 2 [Source:MGI Symbol;Acc:MGI:107368]
ENSMUSG00000027875	11.785	6.133	15.074	14.357	26.229	29.01	10.9973	23.1987	1.07689	0.000668437	0.011143	Hmgcs2	Up	3-hydroxy-3-methylglutaryl-Coenzyme A synthase 2 [Source:MGI Symbol;Acc:MGI:101939]
ENSMUSG00000071719	1.815	1.711	1.593	5.347	2.903	2.526	1.70633	3.592	1.07389	0.000332517	0.00651833	Nalf2	Up	NALCN channel auxiliary factor 2 [Source:MGI Symbol;Acc:MGI:3648377]
ENSMUSG00000011589	5.458	4.799	5.713	17.485	7.779	8.345	5.32333	11.203	1.07348	0.000308934	0.00612876	Fsd1	Up	fibronectin type 3 and SPRY domain-containing protein [Source:MGI Symbol;Acc:MGI:1934858]
ENSMUSG00000034127	10.706	6.788	9.164	12.519	18.524	25.041	8.886	18.6947	1.07302	0.000425467	0.00790551	Tspan8	Up	tetraspanin 8 [Source:MGI Symbol;Acc:MGI:2384918]
ENSMUSG00000013367	6.578	4.885	5.038	21.102	8.033	5.564	5.50033	11.5663	1.07234	0.00198727	0.0251657	Iglon5	Up	IgLON family member 5 [Source:MGI Symbol;Acc:MGI:2686277]
ENSMUSG00000031170	11.767	11.287	10.922	31.408	22.222	17.775	11.3253	23.8017	1.07151	4.98247e-08	5.48736e-06	Slc38a5	Up	solute carrier family 38, member 5 [Source:MGI Symbol;Acc:MGI:2148066]
ENSMUSG00000035385	113.589	119.078	119.405	207.735	236.932	295.187	117.357	246.618	1.07137	5.95892e-07	4.28006e-05	Ccl2	Up	C-C motif chemokine ligand 2 [Source:MGI Symbol;Acc:MGI:98259]
ENSMUSG00000046447	11.092	8.29	10.366	29.359	18.659	14.251	9.916	20.7563	1.06572	5.24956e-07	3.83112e-05	Camk2n1	Up	calcium/calmodulin-dependent protein kinase II inhibitor 1 [Source:MGI Symbol;Acc:MGI:1913509]
ENSMUSG00000026399	17.202	9.769	13.473	25.883	18.285	40.324	13.4813	28.164	1.06289	0.000215455	0.00460618	Cd55	Up	CD55 molecule, decay accelerating factor for complement [Source:MGI Symbol;Acc:MGI:104850]
ENSMUSG00000024502	3.432	4.819	3.486	10.38	5.704	8.433	3.91233	8.17233	1.06272	0.00313633	0.0352246	Jakmip2	Up	janus kinase and microtubule interacting protein 2 [Source:MGI Symbol;Acc:MGI:1923467]
ENSMUSG00000078922	10.825	15.62	4.609	26.631	16.699	21.533	10.3513	21.621	1.06262	0.000638247	0.010779	Tgtp1	Up	T cell specific GTPase 1 [Source:MGI Symbol;Acc:MGI:98734]
ENSMUSG00000015090	592.912	303.719	366.247	1013	1080.21	540.945	420.959	878.052	1.06062	7.10972e-06	0.000306156	Ptgds	Up	prostaglandin D2 synthase (brain) [Source:MGI Symbol;Acc:MGI:99261]
ENSMUSG00000024164	22.386	15.428	17.784	58.222	32.355	25.051	18.5327	38.5427	1.05639	0.000472954	0.00855149	C3	Up	complement component 3 [Source:MGI Symbol;Acc:MGI:88227]
ENSMUSG00000029166	23.472	23.553	25.667	71.773	42.328	37.052	24.2307	50.3843	1.05614	2.7632e-07	2.2824e-05	Mapre3	Up	microtubule-associated protein, RP/EB family, member 3 [Source:MGI Symbol;Acc:MGI:2140967]
ENSMUSG00000038530	30.735	23.05	20.374	61.451	18.738	73.797	24.7197	51.3287	1.05411	0.00130331	0.0182949	Rgs4	Up	regulator of G-protein signaling 4 [Source:MGI Symbol;Acc:MGI:108409]
ENSMUSG00000029223	178.745	145.818	150.814	400.502	254.001	331.54	158.459	328.681	1.05258	4.52746e-09	7.68906e-07	Uchl1	Up	ubiquitin carboxy-terminal hydrolase L1 [Source:MGI Symbol;Acc:MGI:103149]
ENSMUSG00000037126	3.527	3.196	2.565	9.855	5.332	4.074	3.096	6.42033	1.05224	4.5749e-05	0.00134305	Psd	Up	pleckstrin and Sec7 domain containing [Source:MGI Symbol;Acc:MGI:1920978]
ENSMUSG00000026202	41.877	46.322	51.505	131.953	77.67	80.086	46.568	96.5697	1.05223	5.50114e-07	3.98301e-05	Tuba4a	Up	tubulin, alpha 4A [Source:MGI Symbol;Acc:MGI:1095410]
ENSMUSG00000069806	16.312	15.016	18.982	49.863	30.46	23.725	16.77	34.6827	1.04833	3.01267e-06	0.00015658	Cacng7	Up	calcium channel, voltage-dependent, gamma subunit 7 [Source:MGI Symbol;Acc:MGI:1932374]
ENSMUSG00000010607	12.848	13.212	24.722	36.351	38.249	30.384	16.9273	34.9947	1.04778	0.000414218	0.00775201	Pigyl	Up	phosphatidylinositol glycan anchor biosynthesis, class Y-like [Source:MGI Symbol;Acc:MGI:1913518]
ENSMUSG00000071178	30.359	19.24	23.866	42.384	60.969	48.501	24.4883	50.618	1.04756	3.41107e-06	0.00017043	Serpina1b	Up	serine (or cysteine) preptidase inhibitor, clade A, member 1B [Source:MGI Symbol;Acc:MGI:891970]
ENSMUSG00000000154	3.028	2.304	3.03	4.677	6.111	6.492	2.78733	5.76	1.04718	0.00204661	0.0257913	Slc22a18	Up	solute carrier family 22 (organic cation transporter), member 18 [Source:MGI Symbol;Acc:MGI:1336884]
ENSMUSG00000090125	3.623	2.209	3.962	6.591	7.199	6.448	3.26467	6.746	1.0471	5.78025e-05	0.00162097	Pou3f1	Up	POU domain, class 3, transcription factor 1 [Source:MGI Symbol;Acc:MGI:101896]
ENSMUSG00000050052	4.023	3.82	4.142	12.019	6.064	6.681	3.995	8.25467	1.04701	0.000684097	0.0113219	Tdrp	Up	testis development related protein [Source:MGI Symbol;Acc:MGI:1919398]
ENSMUSG00000035373	114.222	128.504	105.374	157.759	265.628	295.5	116.033	239.629	1.04626	2.53461e-05	0.000835915	Ccl7	Up	C-C motif chemokine ligand 7 [Source:MGI Symbol;Acc:MGI:99512]
ENSMUSG00000029361	1.073	1.356	0.765	3.843	1.081	1.67	1.06467	2.198	1.04579	0.000153373	0.00352797	Nos1	Up	nitric oxide synthase 1, neuronal [Source:MGI Symbol;Acc:MGI:97360]
ENSMUSG00000019852	1.544	1.625	1.613	5.32	1.69	2.861	1.594	3.29033	1.04558	0.000421184	0.00786613	Arfgef3	Up	ARFGEF family member 3 [Source:MGI Symbol;Acc:MGI:106387]
ENSMUSG00000041073	21.348	18.508	19.062	47.281	37.882	36.439	19.6393	40.534	1.04539	2.45353e-07	2.07375e-05	Nacad	Up	NAC alpha domain containing [Source:MGI Symbol;Acc:MGI:3603030]
ENSMUSG00000014846	153.045	130.678	108.357	276.526	234.743	297.585	130.693	269.618	1.04473	1.79279e-08	2.46807e-06	Tppp3	Up	tubulin polymerization-promoting protein family member 3 [Source:MGI Symbol;Acc:MGI:1915221]
ENSMUSG00000028351	3.389	3	3.21	11.697	4.902	3.157	3.19967	6.58533	1.04133	0.00316294	0.0354796	Brinp1	Up	bone morphogenic protein/retinoic acid inducible neural specific 1 [Source:MGI Symbol;Acc:MGI:1928478]
ENSMUSG00000000805	6.914	5.235	5.215	14.851	11.315	9.561	5.788	11.909	1.04092	9.62193e-05	0.00244204	Car4	Up	carbonic anhydrase 4 [Source:MGI Symbol;Acc:MGI:1096574]
ENSMUSG00000042429	13.528	14.468	13.767	47.087	22.574	16.226	13.921	28.629	1.04021	5.67448e-05	0.00160618	Adora1	Up	adenosine A1 receptor [Source:MGI Symbol;Acc:MGI:99401]
ENSMUSG00000073876	2.91	2.763	4.524	7.064	7.475	6.407	3.399	6.982	1.03853	0.000565306	0.00971877	Il11ra3	Up	interleukin 11 receptor subunit alpha 3 [Source:MGI Symbol;Acc:MGI:3801997]
ENSMUSG00000020431	2.694	2.321	2.076	7.972	3.461	3.12	2.36367	4.851	1.03726	8.69646e-05	0.00223525	Adcy1	Up	adenylate cyclase 1 [Source:MGI Symbol;Acc:MGI:99677]
ENSMUSG00000050071	6.6	7.031	4.918	17.668	9.126	11.229	6.183	12.6743	1.03553	0.00102316	0.0154234	Bex1	Up	brain expressed X-linked 1 [Source:MGI Symbol;Acc:MGI:1328321]
ENSMUSG00000049556	2.685	3.318	2.391	9.758	3.699	3.742	2.798	5.733	1.03489	0.000676757	0.0112619	Lingo1	Up	leucine rich repeat and Ig domain containing 1 [Source:MGI Symbol;Acc:MGI:1915522]
ENSMUSG00000053963	0.602	1.193	1.245	3.528	1.524	1.176	1.01333	2.076	1.0347	0.0043368	0.0447908	Stum	Up	mechanosensory transduction mediator [Source:MGI Symbol;Acc:MGI:2138735]
ENSMUSG00000036907	2.019	1.701	1.665	4.11	3.427	3.471	1.795	3.66933	1.03153	0.00173941	0.02274	C1ql2	Up	complement component 1, q subcomponent-like 2 [Source:MGI Symbol;Acc:MGI:3032521]
ENSMUSG00000020884	4.942	3.451	5.725	7.545	11.912	9.384	4.706	9.61367	1.03059	0.00231032	0.0281577	Asgr1	Up	asialoglycoprotein receptor 1 [Source:MGI Symbol;Acc:MGI:88081]
ENSMUSG00000029189	5.096	5.552	6.735	18.796	9.223	7.491	5.79433	11.8367	1.03055	0.000151427	0.00348763	Sel1l3	Up	sel-1 suppressor of lin-12-like 3 (C. elegans) [Source:MGI Symbol;Acc:MGI:1916941]
ENSMUSG00000034570	3.509	2.726	1.751	9.203	3.617	3.491	2.662	5.437	1.0303	0.00326023	0.0363021	Inpp5j	Up	inositol polyphosphate 5-phosphatase J [Source:MGI Symbol;Acc:MGI:2158663]
ENSMUSG00000002847	11.587	6.03	9.629	11.077	22.116	22.44	9.082	18.5443	1.0299	0.000709006	0.0116282	Pla1a	Up	phospholipase A1 member A [Source:MGI Symbol;Acc:MGI:1934677]
ENSMUSG00000074227	3.908	3.37	4.833	6.331	9.604	8.777	4.037	8.23733	1.02889	0.00185935	0.0239633	Spint2	Up	serine protease inhibitor, Kunitz type 2 [Source:MGI Symbol;Acc:MGI:1338031]
ENSMUSG00000075033	1.482	1.268	1.902	5.031	2.621	1.838	1.55067	3.16333	1.02856	0.00141322	0.0194406	Nxpe3	Up	neurexophilin and PC-esterase domain family, member 3 [Source:MGI Symbol;Acc:MGI:2686598]
ENSMUSG00000026259	6.322	7.43	8.519	24.551	12.636	8.227	7.42367	15.138	1.02797	0.000458682	0.00832577	Ngef	Up	neuronal guanine nucleotide exchange factor [Source:MGI Symbol;Acc:MGI:1858414]
ENSMUSG00000010086	5.845	4.277	3.931	13.09	7.033	8.516	4.68433	9.54633	1.0271	2.23382e-05	0.000754518	Rnf112	Up	ring finger protein 112 [Source:MGI Symbol;Acc:MGI:106611]
ENSMUSG00000022474	42.19	47.883	46.009	144.834	68.654	63.748	45.3607	92.412	1.02664	1.32287e-05	0.000509575	Pmm1	Up	phosphomannomutase 1 [Source:MGI Symbol;Acc:MGI:1353418]
ENSMUSG00000032131	3.069	2.615	4.525	10.473	5.867	4.454	3.403	6.93133	1.02633	0.000433875	0.00798343	Abcg4	Up	ATP binding cassette subfamily G member 4 [Source:MGI Symbol;Acc:MGI:1890594]
ENSMUSG00000039236	10.41	9.56	8.954	15.814	21.331	21.7	9.64133	19.615	1.02465	6.58604e-05	0.00179433	Isg20	Up	interferon-stimulated protein [Source:MGI Symbol;Acc:MGI:1928895]
ENSMUSG00000026885	1.337	1.635	1.797	5.782	2.158	1.75	1.58967	3.23	1.02281	0.00373269	0.0401839	Ttll11	Up	tubulin tyrosine ligase-like family, member 11 [Source:MGI Symbol;Acc:MGI:1921660]
ENSMUSG00000045284	1.677	1.551	1.347	5.135	2.102	2.058	1.525	3.09833	1.02268	0.00419522	0.0439145	Dcaf12l1	Up	DDB1 and CUL4 associated factor 12-like 1 [Source:MGI Symbol;Acc:MGI:2444462]
ENSMUSG00000059554	6.928	7.071	7.161	20.781	11.387	10.766	7.05333	14.3113	1.02078	0.00056757	0.00974848	Ccdc28a	Up	coiled-coil domain containing 28A [Source:MGI Symbol;Acc:MGI:2443508]
ENSMUSG00000009281	47.599	35.939	40.432	70.652	93.965	86.456	41.3233	83.691	1.01812	1.66842e-06	9.74875e-05	Rarres2	Up	retinoic acid receptor responder (tazarotene induced) 2 [Source:MGI Symbol;Acc:MGI:1918910]
ENSMUSG00000021903	3.992	2.563	3.112	6.611	6.253	6.681	3.22233	6.515	1.01566	1.87979e-05	0.000665879	Galnt15	Up	polypeptide N-acetylgalactosaminyltransferase 15 [Source:MGI Symbol;Acc:MGI:1926004]
ENSMUSG00000032262	4.85	4.155	3.757	14.532	5.656	5.602	4.254	8.59667	1.01496	0.000886665	0.0138186	Elovl4	Up	ELOVL fatty acid elongase 4 [Source:MGI Symbol;Acc:MGI:1933331]
ENSMUSG00000022323	53.604	42.228	45.885	184.58	51.631	50.145	47.239	95.452	1.0148	0.00291984	0.0334549	Rida	Up	reactive intermediate imine deaminase A homolog [Source:MGI Symbol;Acc:MGI:1095401]
ENSMUSG00000015224	13.991	11.297	10.227	38.431	17.216	16.113	11.8383	23.92	1.01475	9.75808e-05	0.00246626	Cyp2j9	Up	cytochrome P450, family 2, subfamily j, polypeptide 9 [Source:MGI Symbol;Acc:MGI:1921769]
ENSMUSG00000023033	4.22	2.629	2.422	12.406	3.438	2.886	3.09033	6.24333	1.01455	1.0597e-07	1.00952e-05	Scn8a	Up	sodium channel, voltage-gated, type VIII, alpha [Source:MGI Symbol;Acc:MGI:103169]
ENSMUSG00000025422	3.905	4.726	4.208	13.057	7.506	5.359	4.27967	8.64067	1.01364	0.000250729	0.00518935	Agap2	Up	ArfGAP with GTPase domain, ankyrin repeat and PH domain 2 [Source:MGI Symbol;Acc:MGI:3580016]
ENSMUSG00000027316	2.573	2.385	3.187	7.116	5.313	4.003	2.715	5.47733	1.01252	0.00325593	0.0362763	Gfra4	Up	glial cell line derived neurotrophic factor family receptor alpha 4 [Source:MGI Symbol;Acc:MGI:1341873]
ENSMUSG00000033585	26.556	26.698	24.39	74.597	43.925	38.118	25.8813	52.2133	1.01251	1.03919e-07	9.9916e-06	Ndn	Up	necdin, MAGE family member [Source:MGI Symbol;Acc:MGI:97290]
ENSMUSG00000043496	14.255	13.063	18.381	56.923	20.59	14.629	15.233	30.714	1.0117	0.00229293	0.0280398	Tril	Up	TLR4 interactor with leucine-rich repeats [Source:MGI Symbol;Acc:MGI:1914123]
ENSMUSG00000063011	40.899	26.274	49.074	37.63	119.529	76.872	38.749	78.0103	1.00951	0.00164203	0.0217814	Msln	Up	mesothelin [Source:MGI Symbol;Acc:MGI:1888992]
ENSMUSG00000025582	5.439	5.736	8.707	20.771	8.231	11.014	6.62733	13.3387	1.00911	0.000510262	0.00904633	Nptx1	Up	neuronal pentraxin 1 [Source:MGI Symbol;Acc:MGI:107811]
ENSMUSG00000032657	15.764	10.015	13.536	24.074	17.534	37.502	13.105	26.37	1.00878	0.000134458	0.0031691	Entrep3	Up	endosomal transmembrane epsin interactor 3 [Source:MGI Symbol;Acc:MGI:1915771]
ENSMUSG00000052852	17.019	15.051	12.37	47.412	15.738	26.204	14.8133	29.7847	1.00767	0.000191733	0.00422323	Reep1	Up	receptor accessory protein 1 [Source:MGI Symbol;Acc:MGI:1098827]
ENSMUSG00000000296	7.868	6.16	7.59	22.614	9.873	10.979	7.206	14.4887	1.00765	0.00263293	0.0309881	Tpd52l1	Up	tumor protein D52-like 1 [Source:MGI Symbol;Acc:MGI:1298386]
ENSMUSG00000022211	1.69	0.853	0.977	3.138	1.793	2.137	1.17333	2.356	1.00573	0.00011491	0.00280287	Carmil3	Up	capping protein regulator and myosin 1 linker 3 [Source:MGI Symbol;Acc:MGI:2448573]
ENSMUSG00000057596	3.909	2.457	3.919	9.797	4.448	6.399	3.42833	6.88133	1.00518	9.99621e-05	0.00251594	Trim30d	Up	tripartite motif-containing 30D [Source:MGI Symbol;Acc:MGI:3035181]
ENSMUSG00000032482	18.353	22.616	30.353	68.544	41.576	32.955	23.774	47.6917	1.00435	6.5359e-05	0.00178334	Cspg5	Up	chondroitin sulfate proteoglycan 5 [Source:MGI Symbol;Acc:MGI:1352747]
ENSMUSG00000051851	16.776	18.092	16.335	43.081	32.636	26.84	17.0677	34.1857	1.00213	0.000172012	0.00385426	Rtl8c	Up	retrotransposon Gag like 8C [Source:MGI Symbol;Acc:MGI:1920115]
ENSMUSG00000036502	6.509	6.328	7.24	22.348	7.668	10.147	6.69233	13.3877	1.00032	0.000751257	0.0121458	Tmem255a	Up	transmembrane protein 255A [Source:MGI Symbol;Acc:MGI:3045722]
	2.193	1.532	1.802	4.915	2.576	3.563	1.84233	3.68467	1	0.00149251	0.0202251	Amigo2	Up	adhesion molecule with Ig like domain 2 [Source:MGI Symbol;Acc:MGI:2145995]
ENSMUSG00000046805	911.105	992.173	840.35	353.327	409.101	600.638	914.543	454.355	-1.00923	0.00303257	0.0344855	Mpeg1	Down	macrophage expressed gene 1 [Source:MGI Symbol;Acc:MGI:1333743]
ENSMUSG00000047875	27.858	27.669	24.26	9.393	14.397	15.811	26.5957	13.2003	-1.01062	0.00322172	0.0359834	Gpr157	Down	G protein-coupled receptor 157 [Source:MGI Symbol;Acc:MGI:2442046]
ENSMUSG00000054626	15.08	16.658	18.911	8.458	9.823	6.825	16.883	8.36867	-1.0125	0.00363965	0.0393886	Xlr	Down	X-linked lymphocyte-regulated [Source:MGI Symbol;Acc:MGI:98976]
ENSMUSG00000047747	4.965	4.941	4.492	2.096	2.302	2.71	4.79933	2.36933	-1.01835	0.000983837	0.0150112	Rnf150	Down	ring finger protein 150 [Source:MGI Symbol;Acc:MGI:2443860]
ENSMUSG00000046410	12.729	13.49	9.387	5.265	5.758	6.469	11.8687	5.83067	-1.02543	0.00108806	0.0162109	Kcnk6	Down	potassium inwardly-rectifying channel, subfamily K, member 6 [Source:MGI Symbol;Acc:MGI:1891291]
ENSMUSG00000025993	22.213	22.268	25.269	14.805	8.374	11.059	23.25	11.4127	-1.02659	0.000150401	0.00346838	Slc40a1	Down	solute carrier family 40 (iron-regulated transporter), member 1 [Source:MGI Symbol;Acc:MGI:1315204]
ENSMUSG00000061132	45.896	45.788	43.988	15.612	24.866	25.773	45.224	22.0837	-1.03411	0.00238872	0.0287673	Blnk	Down	B cell linker [Source:MGI Symbol;Acc:MGI:96878]
ENSMUSG00000020120	363.9	392.326	335.292	148.691	150.46	230.338	363.839	176.496	-1.04366	0.00126701	0.017967	Plek	Down	pleckstrin [Source:MGI Symbol;Acc:MGI:1860485]
ENSMUSG00000024598	4.73	4.199	4.202	1.652	2.232	2.473	4.377	2.119	-1.04656	0.00178105	0.0231677	Fbn2	Down	fibrillin 2 [Source:MGI Symbol;Acc:MGI:95490]
ENSMUSG00000031264	32.65	32.625	30.059	15.22	14.652	16.039	31.778	15.3037	-1.05415	2.8164e-05	0.000904235	Btk	Down	Bruton agammaglobulinemia tyrosine kinase [Source:MGI Symbol;Acc:MGI:88216]
ENSMUSG00000025453	25.162	28.165	19.566	11.897	9.72	13.442	24.2977	11.6863	-1.056	0.000127723	0.00305392	Nnt	Down	nicotinamide nucleotide transhydrogenase [Source:MGI Symbol;Acc:MGI:109279]
ENSMUSG00000036887	1097.55	1255.47	1038.54	571.861	579.541	476.224	1130.52	542.542	-1.05918	2.54464e-07	2.12116e-05	C1qa	Down	complement component 1, q subcomponent, alpha polypeptide [Source:MGI Symbol;Acc:MGI:88223]
ENSMUSG00000033792	21.79	18.749	15.196	9.775	6.843	10.098	18.5783	8.90533	-1.06088	0.000244828	0.00508459	Atp7a	Down	ATPase, Cu++ transporting, alpha polypeptide [Source:MGI Symbol;Acc:MGI:99400]
ENSMUSG00000036905	750.082	893.758	778.641	372.638	402.958	385.477	807.494	387.024	-1.06103	6.75453e-06	0.000294348	C1qb	Down	complement component 1, q subcomponent, beta polypeptide [Source:MGI Symbol;Acc:MGI:88224]
ENSMUSG00000042286	125.373	126.866	131.123	45.912	67.791	69.784	127.787	61.1623	-1.06303	0.000164101	0.0037044	Stab1	Down	stabilin 1 [Source:MGI Symbol;Acc:MGI:2178742]
ENSMUSG00000021665	1356.51	1319.45	979.6	560.28	606.052	577.777	1218.52	581.37	-1.0676	6.31588e-06	0.000279932	Hexb	Down	hexosaminidase B [Source:MGI Symbol;Acc:MGI:96074]
ENSMUSG00000036896	987.167	1177.99	974.143	476	523.964	483.642	1046.43	494.535	-1.08134	3.40291e-06	0.00017043	C1qc	Down	complement component 1, q subcomponent, C chain [Source:MGI Symbol;Acc:MGI:88225]
ENSMUSG00000028718	5.439	4.054	3.698	2.309	2.089	1.835	4.397	2.07767	-1.08156	0.000367229	0.00703191	Stil	Down	Scl/Tal1 interrupting locus [Source:MGI Symbol;Acc:MGI:107477]
ENSMUSG00000040564	40.844	56.682	38.182	17.227	24.566	21.983	45.236	21.2587	-1.08942	0.00449235	0.0458624	Apoc1	Down	apolipoprotein C-I [Source:MGI Symbol;Acc:MGI:88053]
ENSMUSG00000041498	4.657	4.366	3.487	2.688	1.509	1.676	4.17	1.95767	-1.09091	0.000982668	0.0150059	Kif14	Down	kinesin family member 14 [Source:MGI Symbol;Acc:MGI:1098226]
ENSMUSG00000020143	46.529	43.491	32.155	17.794	17.805	21.554	40.725	19.051	-1.09605	7.58484e-05	0.00200337	Dock2	Down	dedicator of cyto-kinesis 2 [Source:MGI Symbol;Acc:MGI:2149010]
ENSMUSG00000026358	52.611	45.55	36.577	23.12	19.233	20.59	44.9127	20.981	-1.09804	8.81196e-06	0.000369817	Rgs1	Down	regulator of G-protein signaling 1 [Source:MGI Symbol;Acc:MGI:1354694]
ENSMUSG00000041707	43.855	43.52	28.359	16.034	19.677	18.282	38.578	17.9977	-1.09997	0.00130247	0.0182949	Tmem273	Down	transmembrane protein 273 [Source:MGI Symbol;Acc:MGI:1916319]
ENSMUSG00000024781	349.389	358.15	334.65	114.183	159.387	212.285	347.396	161.952	-1.10102	0.00150562	0.0203069	Lipa	Down	lysosomal acid lipase A [Source:MGI Symbol;Acc:MGI:96789]
ENSMUSG00000040522	28.617	22.866	25.309	8.525	8.979	18.203	25.5973	11.9023	-1.10475	0.00153186	0.0205169	Tlr8	Down	toll-like receptor 8 [Source:MGI Symbol;Acc:MGI:2176887]
ENSMUSG00000015243	176.346	153.703	169.899	63.912	70.261	98.155	166.649	77.4427	-1.10562	0.000370982	0.00707396	Abca1	Down	ATP-binding cassette, sub-family A member 1 [Source:MGI Symbol;Acc:MGI:99607]
ENSMUSG00000030249	7.646	6.093	5.32	3.669	2.511	2.648	6.353	2.94267	-1.11031	3.6962e-05	0.00111574	Abcc9	Down	ATP-binding cassette, sub-family C member 9 [Source:MGI Symbol;Acc:MGI:1352630]
ENSMUSG00000021624	119.771	141.427	104.422	53.019	50.66	64.936	121.873	56.205	-1.11661	7.27229e-05	0.00193411	Cd180	Down	CD180 antigen [Source:MGI Symbol;Acc:MGI:1194924]
ENSMUSG00000004730	195.137	201.12	156.566	63.699	81.912	109.03	184.274	84.8803	-1.11835	0.000916689	0.014117	Adgre1	Down	adhesion G protein-coupled receptor E1 [Source:MGI Symbol;Acc:MGI:106912]
ENSMUSG00000033386	28.867	26.945	18.615	11.019	10.894	12.314	24.809	11.409	-1.12069	0.00179953	0.0233913	Frrs1	Down	ferric-chelate reductase 1 [Source:MGI Symbol;Acc:MGI:108076]
ENSMUSG00000047749	4.417	3.469	3.598	1.608	1.408	2.232	3.828	1.74933	-1.12979	0.00234213	0.028431	Zc3hav1l	Down	zinc finger CCCH-type, antiviral 1-like [Source:MGI Symbol;Acc:MGI:2443387]
ENSMUSG00000021003	65.542	67.586	61.853	29.162	27.318	31.586	64.9937	29.3553	-1.14668	7.26465e-06	0.000312088	Galc	Down	galactosylceramidase [Source:MGI Symbol;Acc:MGI:95636]
ENSMUSG00000098950	14.373	16.1	11.583	4.957	5.039	8.944	14.0187	6.31333	-1.15088	0.000950489	0.0145881	Gm28036	Down	predicted gene, 28036 [Source:MGI Symbol;Acc:MGI:5547772]
ENSMUSG00000037370	69.497	64.575	47.854	21.962	26.339	33.386	60.642	27.229	-1.15517	0.00182326	0.0236153	Enpp1	Down	ectonucleotide pyrophosphatase/phosphodiesterase 1 [Source:MGI Symbol;Acc:MGI:97370]
ENSMUSG00000020399	84.376	84.364	69.617	32.366	31.977	41.451	79.4523	35.2647	-1.17187	2.30252e-05	0.000773407	Havcr2	Down	hepatitis A virus cellular receptor 2 [Source:MGI Symbol;Acc:MGI:2159682]
ENSMUSG00000020264	16.366	17.128	27.277	5.919	9.892	10.693	20.257	8.83467	-1.19717	0.00329205	0.0364553	Slc36a2	Down	solute carrier family 36 (proton/amino acid symporter), member 2 [Source:MGI Symbol;Acc:MGI:1891430]
ENSMUSG00000098557	79.605	73.665	48.099	32.909	25.742	29.107	67.123	29.2527	-1.19824	1.44958e-06	8.69363e-05	Kctd12	Down	potassium channel tetramerisation domain containing 12 [Source:MGI Symbol;Acc:MGI:2145823]
ENSMUSG00000094410	19.108	14.522	13.35	7.003	5.452	7.986	15.66	6.81367	-1.20058	2.36018e-05	0.000785517	Zbed6	Down	zinc finger, BED type containing 6 [Source:MGI Symbol;Acc:MGI:3828086]
ENSMUSG00000069516	9717.93	12491.2	15813.8	3588.51	6190.13	6471.44	12674.3	5416.69	-1.22642	0.000777118	0.0124421	Lyz2	Down	lysozyme 2 [Source:MGI Symbol;Acc:MGI:96897]
ENSMUSG00000071203	7.323	7.111	6.373	2.879	2.26	3.748	6.93567	2.96233	-1.2273	0.000295605	0.005916	Naip5	Down	NLR family, apoptosis inhibitory protein 5 [Source:MGI Symbol;Acc:MGI:1298220]
ENSMUSG00000052336	61.076	75.815	38.573	43.553	19.292	11.571	58.488	24.8053	-1.23749	0.000552488	0.0095907	Cx3cr1	Down	C-X3-C motif chemokine receptor 1 [Source:MGI Symbol;Acc:MGI:1333815]
ENSMUSG00000015112	8.614	9.616	4.52	4.057	2.9	2.668	7.58333	3.20833	-1.24101	0.00049022	0.00877663	Slc25a13	Down	solute carrier family 25 (mitochondrial carrier, adenine nucleotide translocator), member 13 [Source:MGI Symbol;Acc:MGI:1354721]
ENSMUSG00000041957	3.311	2.719	2.76	1.118	1.437	1.158	2.93	1.23767	-1.24328	0.00416053	0.0436387	Pkp2	Down	plakophilin 2 [Source:MGI Symbol;Acc:MGI:1914701]
ENSMUSG00000040229	20.888	26.516	18.931	18.651	6.249	3.105	22.1117	9.335	-1.24409	0.00441597	0.0452861	Gpr34	Down	G protein-coupled receptor 34 [Source:MGI Symbol;Acc:MGI:1346334]
ENSMUSG00000079293	48.442	48.904	50.883	20.163	19.089	23.275	49.4097	20.8423	-1.24528	3.36954e-05	0.00104312	Clec7a	Down	C-type lectin domain family 7, member a [Source:MGI Symbol;Acc:MGI:1861431]
ENSMUSG00000047497	12.447	9.554	10.665	3.126	4.052	6.511	10.8887	4.563	-1.25477	0.00124267	0.0177138	Adamts12	Down	ADAM metallopeptidase with thrombospondin type 1 motif 12 [Source:MGI Symbol;Acc:MGI:2146046]
ENSMUSG00000026712	43.518	39.974	41.763	14.32	14.973	22.726	41.7517	17.3397	-1.26776	7.25374e-05	0.00193277	Mrc1	Down	mannose receptor, C type 1 [Source:MGI Symbol;Acc:MGI:97142]
ENSMUSG00000056130	12.612	12.215	8.685	4.138	4.11	5.628	11.1707	4.62533	-1.27209	0.000112106	0.00275295	Ticam2	Down	TIR domain containing adaptor molecule 2 [Source:MGI Symbol;Acc:MGI:3040056]
ENSMUSG00000001349	17.097	11.126	11.172	4.34	5.32	6.648	13.1317	5.436	-1.27243	0.00127517	0.0180611	Cnn1	Down	calponin 1 [Source:MGI Symbol;Acc:MGI:104979]
ENSMUSG00000020661	41.795	35.955	22.365	13.738	10.682	16.718	33.3717	13.7127	-1.28311	0.000133945	0.0031691	Dnmt3a	Down	DNA methyltransferase 3A [Source:MGI Symbol;Acc:MGI:1261827]
ENSMUSG00000042476	3.658	2.751	2.922	1.362	1.228	1.221	3.11033	1.27033	-1.29186	0.000393545	0.00744948	Abcb4	Down	ATP-binding cassette, sub-family B member 4 [Source:MGI Symbol;Acc:MGI:97569]
ENSMUSG00000005124	17.043	13.567	13.31	4.148	5.536	8.22	14.64	5.968	-1.2946	0.000667673	0.0111414	Ccn4	Down	cellular communication network factor 4 [Source:MGI Symbol;Acc:MGI:1197008]
ENSMUSG00000025742	44.508	43.027	17.215	17.048	11.664	13.731	34.9167	14.1477	-1.30335	0.00017178	0.00385381	Prps2	Down	phosphoribosyl pyrophosphate synthetase 2 [Source:MGI Symbol;Acc:MGI:97776]
ENSMUSG00000044468	53.112	50.771	33.148	18.057	17.494	19.951	45.677	18.5007	-1.30389	1.09249e-06	6.99042e-05	Tent5c	Down	terminal nucleotidyltransferase 5C [Source:MGI Symbol;Acc:MGI:1921895]
ENSMUSG00000030789	33.915	41.381	48.467	13.705	17.537	18.776	41.2543	16.6727	-1.30706	2.21836e-05	0.000752089	Itgax	Down	integrin alpha X [Source:MGI Symbol;Acc:MGI:96609]
ENSMUSG00000025701	8.919	9.677	7.804	3.597	3.298	3.719	8.8	3.538	-1.31457	1.32357e-05	0.000509575	Alox5	Down	arachidonate 5-lipoxygenase [Source:MGI Symbol;Acc:MGI:87999]
ENSMUSG00000035783	310.312	231.776	276.677	52.122	124.902	147.176	272.922	108.067	-1.33657	0.0019539	0.0248643	Acta2	Down	actin alpha 2, smooth muscle, aorta [Source:MGI Symbol;Acc:MGI:87909]
ENSMUSG00000064267	33.921	47.364	54.197	12.268	22.238	19.132	45.1607	17.8793	-1.33677	0.000293625	0.00589585	Hvcn1	Down	hydrogen voltage-gated channel 1 [Source:MGI Symbol;Acc:MGI:1921346]
ENSMUSG00000072720	1.123	2.013	2.788	0.7	0.827	0.784	1.97467	0.770333	-1.35805	0.0022349	0.0275153	Myo18b	Down	myosin XVIIIb [Source:MGI Symbol;Acc:MGI:1921626]
ENSMUSG00000021311	9.43	10.672	7.234	4.649	2.515	3.357	9.112	3.507	-1.37753	5.86343e-06	0.000263087	Mtr	Down	5-methyltetrahydrofolate-homocysteine methyltransferase [Source:MGI Symbol;Acc:MGI:894292]
ENSMUSG00000068876	2.538	2.832	1.039	0.803	0.7	0.789	2.13633	0.764	-1.48349	0.0022793	0.0279295	Cgn	Down	cingulin [Source:MGI Symbol;Acc:MGI:1927237]
ENSMUSG00000002944	322.045	336.108	531.369	85.855	124.948	211.513	396.507	140.772	-1.49399	0.00036707	0.00703191	Cd36	Down	CD36 molecule [Source:MGI Symbol;Acc:MGI:107899]
ENSMUSG00000026994	5.258	4.523	3.593	1.617	1.447	1.626	4.458	1.56333	-1.51177	1.04086e-05	0.000417537	Galnt3	Down	polypeptide N-acetylgalactosaminyltransferase 3 [Source:MGI Symbol;Acc:MGI:894695]
ENSMUSG00000049134	1.9	2.657	1.665	0.863	0.656	0.648	2.074	0.722333	-1.52168	0.000129065	0.00308196	Nrap	Down	nebulin-related anchoring protein [Source:MGI Symbol;Acc:MGI:1098765]
ENSMUSG00000029304	26359.5	34206.4	21183.2	9055.3	7474	11447.8	27249.7	9325.7	-1.54696	1.72158e-07	1.54874e-05	Spp1	Down	secreted phosphoprotein 1 [Source:MGI Symbol;Acc:MGI:98389]
ENSMUSG00000079685	12.891	9.374	12.929	4.157	3.937	3.799	11.7313	3.96433	-1.56522	6.10501e-07	4.36773e-05	Ulbp1	Down	UL16 binding protein 1 [Source:MGI Symbol;Acc:MGI:1925027]
ENSMUSG00000008845	7.156	5.547	3.989	1.889	1.48	2.098	5.564	1.82233	-1.61034	5.06179e-06	0.000234053	Cd163	Down	CD163 antigen [Source:MGI Symbol;Acc:MGI:2135946]
ENSMUSG00000044244	1.708	2.273	1.961	0.562	0.512	0.764	1.98067	0.612667	-1.69281	0.00207462	0.025962	Il20rb	Down	interleukin 20 receptor beta [Source:MGI Symbol;Acc:MGI:2143266]
ENSMUSG00000074336	10.458	16.014	9.182	2.021	5.131	3.803	11.8847	3.65167	-1.70247	0.00341518	0.0375897	Apoc4	Down	apolipoprotein C-IV [Source:MGI Symbol;Acc:MGI:87878]
ENSMUSG00000028238	68.938	91.841	105.736	15.036	25.611	40.989	88.8383	27.212	-1.70694	4.89054e-05	0.00142194	Atp6v0d2	Down	ATPase, H+ transporting, lysosomal V0 subunit D2 [Source:MGI Symbol;Acc:MGI:1924415]
ENSMUSG00000032496	17.791	14.511	2.624	2.553	4.639	3.467	11.642	3.553	-1.71223	0.00269757	0.0314981	Ltf	Down	lactotransferrin [Source:MGI Symbol;Acc:MGI:96837]
ENSMUSG00000026866	2.432	3.827	1.928	0.779	0.732	0.961	2.729	0.824	-1.72766	0.00468256	0.0474047	Kynu	Down	kynureninase [Source:MGI Symbol;Acc:MGI:1918039]
ENSMUSG00000078452	16.251	14.496	9.667	1.455	2.892	7.555	13.4713	3.96733	-1.76365	0.00488506	0.0489368	Raet1d	Down	retinoic acid early transcript delta [Source:MGI Symbol;Acc:MGI:1861032]
ENSMUSG00000052316	6.312	5.508	5.865	0.842	2.291	2.06	5.895	1.731	-1.76789	3.6041e-05	0.00109705	Lrrc15	Down	leucine rich repeat containing 15 [Source:MGI Symbol;Acc:MGI:1921738]
ENSMUSG00000049723	106.903	74.287	105.526	20.703	20.706	42.759	95.572	28.056	-1.76828	1.16868e-05	0.000459915	Mmp12	Down	matrix metallopeptidase 12 [Source:MGI Symbol;Acc:MGI:97005]
ENSMUSG00000026938	27.508	28.134	29.699	5.275	8.706	9.322	28.447	7.76767	-1.87272	9.52085e-08	9.40287e-06	Fcna	Down	ficolin A [Source:MGI Symbol;Acc:MGI:1340905]
ENSMUSG00000015568	38.82	47.725	46.333	12.961	9.977	12.928	44.2927	11.9553	-1.88941	3.10812e-10	8.96521e-08	Lpl	Down	lipoprotein lipase [Source:MGI Symbol;Acc:MGI:96820]
ENSMUSG00000069515	5.058	6.198	11.572	1.627	2.432	2.045	7.60933	2.03467	-1.90298	0.000210216	0.00455308	Lyz1	Down	lysozyme 1 [Source:MGI Symbol;Acc:MGI:96902]
ENSMUSG00000004814	21.236	14.642	9.002	1.822	3.983	5.132	14.96	3.64567	-2.03686	0.00034028	0.00662052	Ccl24	Down	C-C motif chemokine ligand 24 [Source:MGI Symbol;Acc:MGI:1928953]
ENSMUSG00000035183	10.54	12.346	9.417	3.256	1.37	3.219	10.7677	2.615	-2.04182	2.66682e-07	2.21285e-05	Slc24a5	Down	solute carrier family 24, member 5 [Source:MGI Symbol;Acc:MGI:2677271]
ENSMUSG00000036928	2.871	2.329	0.313	0.573	0.362	0.387	1.83767	0.440667	-2.06012	7.98512e-05	0.00208785	Stag3	Down	STAG3 cohesin complex component [Source:MGI Symbol;Acc:MGI:1355311]
ENSMUSG00000040152	454.354	445.592	217.212	67.531	82.871	106.122	372.386	85.508	-2.12267	2.51849e-10	7.62768e-08	Thbs1	Down	thrombospondin 1 [Source:MGI Symbol;Acc:MGI:98737]
ENSMUSG00000026725	1.694	3.296	3.397	0.436	0.773	0.655	2.79567	0.621333	-2.16975	2.82054e-06	0.000149431	Tnn	Down	tenascin N [Source:MGI Symbol;Acc:MGI:2665790]
ENSMUSG00000026390	14.805	11.012	42.198	2.448	5.271	6.192	22.6717	4.637	-2.28963	7.4914e-06	0.000318814	Marco	Down	macrophage receptor with collagenous structure [Source:MGI Symbol;Acc:MGI:1309998]
ENSMUSG00000015852	244.818	286.513	81.157	53.019	47.499	15.027	204.163	38.515	-2.40623	0.000446032	0.00816242	Fcrl2	Down	Fc receptor like 2 [Source:MGI Symbol;Acc:MGI:1933397]
ENSMUSG00000026012	6.247	6.937	2.841	1.056	1.129	0.818	5.34167	1.001	-2.41585	7.10353e-10	1.76829e-07	Cd28	Down	CD28 antigen [Source:MGI Symbol;Acc:MGI:88327]
ENSMUSG00000004552	45.394	23.195	15.81	4.773	6.3	3.556	28.133	4.87633	-2.52839	1.04061e-11	4.61219e-09	Ctse	Down	cathepsin E [Source:MGI Symbol;Acc:MGI:107361]
ENSMUSG00000074419	6.393	7.996	4.277	1.229	0.245	1.438	6.222	0.970667	-2.68033	3.9856e-06	0.000193137	Pira13	Down	paired-Ig-like receptor A13 [Source:MGI Symbol;Acc:MGI:3705216]
ENSMUSG00000015854	102.13	142.313	54.695	11.452	20.238	8.345	99.7127	13.345	-2.90148	3.335e-15	4.32883e-12	Cd5l	Down	CD5 antigen-like [Source:MGI Symbol;Acc:MGI:1334419]
ENSMUSG00000094686	8.569	20.079	2.469	1.069	0.47	2.407	10.3723	1.31533	-2.97924	0.000168381	0.00379076	Ccl21a	Down	C-C motif chemokine ligand 21 (serine) [Source:MGI Symbol;Acc:MGI:1349183]
ENSMUSG00000047562	25.997	22.975	11.661	1.754	2.137	3.771	20.211	2.554	-2.98431	4.44505e-12	2.24376e-09	Mmp10	Down	matrix metallopeptidase 10 [Source:MGI Symbol;Acc:MGI:97007]
ENSMUSG00000044206	8.456	5.621	7.649	0.422	1.285	0.745	7.242	0.817333	-3.14739	1.06074e-09	2.37973e-07	Vsig4	Down	V-set and immunoglobulin domain containing 4 [Source:MGI Symbol;Acc:MGI:2679720]
ENSMUSG00000029814	1.569	1.076	0.606	0.234	0.073	0.042	1.08367	0.116333	-3.21958	5.16449e-06	0.000238196	Igf2bp3	Down	insulin-like growth factor 2 mRNA binding protein 3 [Source:MGI Symbol;Acc:MGI:1890359]
ENSMUSG00000050578	57.428	47.965	28.925	3.525	4.093	6.123	44.7727	4.58033	-3.28909	6.72787e-22	3.05647e-18	Mmp13	Down	matrix metallopeptidase 13 [Source:MGI Symbol;Acc:MGI:1340026]
ENSMUSG00000039462	1.915	2.064	1.372	0.232	0.163	0.028	1.78367	0.141	-3.66108	4.95686e-08	5.48736e-06	Col10a1	Down	collagen, type X, alpha 1 [Source:MGI Symbol;Acc:MGI:88445]
ENSMUSG00000027597	43.691	33.281	0.959	1.507	2.026	2.361	25.977	1.96467	-3.72488	0.00366175	0.0395608	Ahcy	Down	S-adenosylhomocysteine hydrolase [Source:MGI Symbol;Acc:MGI:87968]
ENSMUSG00000029306	1.183	0.11	7.737	0.117	0.099	0.129	3.01	0.115	-4.71006	1.71066e-05	0.000618014	Ibsp	Down	integrin binding sialoprotein [Source:MGI Symbol;Acc:MGI:96389]
ENSMUSG00000027073	6.714	1.353	0	0	0.122	0.106	2.689	0.076	-5.14493	0.00239549	0.0288283	Prg2	Down	proteoglycan 2, bone marrow [Source:MGI Symbol;Acc:MGI:103294]
ENSMUSG00000018362	126.387	86.239	30.665	2.2	1.059	1.496	81.097	1.585	-5.67709	1.26363e-43	2.29626e-39	Kpna2	Down	karyopherin subunit alpha 2 [Source:MGI Symbol;Acc:MGI:103561]
ENSMUSG00000029368	0.782	3.121	0.053	0	0	0.044	1.31867	0.0146667	-6.4904	0.000176939	0.00395489	Alb	Down	albumin [Source:MGI Symbol;Acc:MGI:87991]
ENSMUSG00000097565	0.963	0.348	0.302	0	0	0	0.537667	0.001	-9.07057	0.00363748	0.0393886	Gm26965	Down	predicted gene, 26965 [Source:MGI Symbol;Acc:MGI:5504080]

## Sheet: C176+ADU-S100 vs. Vehicle
Supplementary Table 4.3. DEGs in the C176+ADU-S100-treated group compared to the vehicle group (|Fold Change| >= 2 and FDR < 0.05)
C176+ADU-S100-3d vs. Vehicle-3d																C176+ADU-S100-14d vs. Vehicle-14d
Id	Vehicle treatment			C176+ADU-S100 treatment			Average		log2(FC)	PValue	FDR (Q value)	Symbol	Status	Description		Id	Vehicle treatment			C176+ADU-S100 treatment			Average		log2(FC)	PValue	FDR (Q value)	Symbol	Status	Description
	S1-TPM	S2-TPM	S3-TPM	S1-TPM	S2-TPM	S3-TPM	Vehicle	C176+ADU-S100									S1-TPM	S2-TPM	S3-TPM	S1-TPM	S2-TPM	S3-TPM	Vehicle	C176+ADU-S100
ENSMUSG00000031760	81.631	81.767	83.266	169.599	172.679	155.661	82.2213	165.98	1.01342	8.59814e-13	1.54577e-08	Mt3	Up	metallothionein 3 [Source:MGI Symbol;Acc:MGI:97173]		ENSMUSG00000022902	0	0	0	2.085	1.563	1.662	0.001	1.77	10.7895	0.000779063	0.00632638	Stfa2	Up	stefin A2 [Source:MGI Symbol;Acc:MGI:106197]
																ENSMUSG00000096515	0	0	0	2.472	1.192	0.951	0.001	1.53833	10.5872	0.00850055	0.0415143	Igkv14-100	Up	immunoglobulin kappa chain variable 14-100 [Source:MGI Symbol;Acc:MGI:4439559]
																ENSMUSG00000068252	0	0	0	0.722	1.196	1.708	0.001	1.20867	10.2392	3.63839e-07	1.10995e-05	Apol7b	Up	apolipoprotein L 7b [Source:MGI Symbol;Acc:MGI:3583950]
																ENSMUSG00000050345	0	0	0	0.073	1.492	0.925	0.001	0.83	9.69697	0.000280345	0.00278648	4930486L24Rik	Up	RIKEN cDNA 4930486L24 gene [Source:MGI Symbol;Acc:MGI:1922258]
																ENSMUSG00000034387	0	0	0	0.369	0.499	0.662	0.001	0.51	8.99435	0.0043069	0.0246303	Ssu2	Up	ssu-2 homolog [Source:MGI Symbol;Acc:MGI:2443733]
																ENSMUSG00000078139	0.068	0	0	6.174	8.553	4.151	0.0226667	6.29267	8.11696	1.6417e-11	1.77539e-09	AK157302	Up	cDNA sequence AK157302 [Source:MGI Symbol;Acc:MGI:3574096]
																ENSMUSG00000059657	0	0.861	0	10.675	2.761	10.411	0.287	7.949	4.79165	3.47262e-06	7.74871e-05	Stfa2l1	Up	stefin A2 like 1 [Source:MGI Symbol;Acc:MGI:3524944]
																ENSMUSG00000095630	0	0.326	0	0.296	3.706	2.425	0.108667	2.14233	4.3012	0.00954171	0.0452622	Igkv6-23	Up	immunoglobulin kappa variable 6-23 [Source:MGI Symbol;Acc:MGI:3711980]
																ENSMUSG00000089727	0	1.089	0.179	5.192	5.803	7.811	0.422667	6.26867	3.89057	6.03242e-11	5.61575e-09	Klra8	Up	killer cell lectin-like receptor, subfamily A, member 8 [Source:MGI Symbol;Acc:MGI:102968]
																ENSMUSG00000072718	0.134	0.731	0	2.903	3.778	4.144	0.288333	3.60833	3.64552	6.24126e-06	0.0001258	Klra10	Up	killer cell lectin-like receptor subfamily A, member 10 [Source:MGI Symbol;Acc:MGI:1321093]
																ENSMUSG00000033024	0.197	1.468	0.498	5.538	5.896	11.386	0.721	7.60667	3.39919	8.57637e-11	7.82269e-09	Klra9	Up	killer cell lectin-like receptor subfamily A, member 9 [Source:MGI Symbol;Acc:MGI:1321153]
																ENSMUSG00000069609	13.038	0.409	7.197	69.467	77.996	68.839	6.88133	72.1007	3.38925	0.00145767	0.0105344	Cd300ld4	Up	CD300 molecule like family member D4 [Source:MGI Symbol;Acc:MGI:3702658]
																ENSMUSG00000052736	0.556	0.445	0.045	2.021	3.039	4.532	0.348667	3.19733	3.19695	4.21358e-05	0.000611343	Klrc2	Up	killer cell lectin-like receptor subfamily C, member 2 [Source:MGI Symbol;Acc:MGI:1336162]
																ENSMUSG00000039462	0.071	0.077	0.232	0.349	2.42	0.607	0.126667	1.12533	3.15124	7.63384e-05	0.000985469	Col10a1	Up	collagen, type X, alpha 1 [Source:MGI Symbol;Acc:MGI:88445]
																ENSMUSG00000079597	0.534	0	2.046	10.277	4.573	5.133	0.86	6.661	2.95333	0.000176112	0.00192646	Cstdc4	Up	cystatin domain containing 4 [Source:MGI Symbol;Acc:MGI:3645124]
																ENSMUSG00000010529	0.911	1.188	0.896	8.53	5.714	7.18	0.998333	7.14133	2.8386	1.03272e-12	1.62183e-10	Gm266	Up	predicted gene 266 [Source:MGI Symbol;Acc:MGI:2685112]
																ENSMUSG00000021403	0.272	0.259	0.149	1.14	1.778	1.616	0.226667	1.51133	2.73718	1.29188e-07	4.58377e-06	Serpinb9b	Up	serine (or cysteine) peptidase inhibitor, clade B, member 9b [Source:MGI Symbol;Acc:MGI:894668]
																ENSMUSG00000067212	37.459	49.464	35.4	229.118	344.838	235.042	40.7743	269.666	2.72544	2.80642e-58	2.5342e-54	H2-T23	Up	histocompatibility 2, T region locus 23 [Source:MGI Symbol;Acc:MGI:95957]
																ENSMUSG00000076934	1.698	0	0.619	4.743	5.38	4.577	0.772333	4.9	2.66549	0.00177466	0.012294	Iglv1	Up	immunoglobulin lambda variable 1 [Source:MGI Symbol;Acc:MGI:96530]
																ENSMUSG00000100838	0.956	1.536	0	4.985	3.906	6.318	0.830667	5.06967	2.60955	7.28417e-05	0.000949835	Gm29094	Up	predicted gene 29094 [Source:MGI Symbol;Acc:MGI:5579800]
																ENSMUSG00000052212	0.163	0.177	0.045	0.563	0.891	0.783	0.128333	0.745667	2.53863	0.000937197	0.00733989	Cd177	Up	CD177 antigen [Source:MGI Symbol;Acc:MGI:1916141]
																ENSMUSG00000019932	0.097	0.053	0.106	0.478	0.554	0.442	0.0853333	0.491333	2.52552	0.0106444	0.0491407	Kera	Up	keratocan [Source:MGI Symbol;Acc:MGI:1202398]
																ENSMUSG00000033508	0.429	0.622	0.469	3.526	1.972	3.181	0.506667	2.893	2.51346	1.34965e-06	3.40769e-05	Asprv1	Up	aspartic peptidase, retroviral-like 1 [Source:MGI Symbol;Acc:MGI:1915105]
																ENSMUSG00000116121	0.097	0	0.644	0.604	0.863	2.416	0.247	1.29433	2.38963	0.00362779	0.0216875	Gm49486	Up	predicted gene, 49486 [Source:MGI Symbol;Acc:MGI:6155161]
																ENSMUSG00000043932	0.085	0.123	0.062	0.507	0.376	0.515	0.09	0.466	2.37233	0.00193943	0.0132274	Klri2	Up	killer cell lectin-like receptor family I member 2 [Source:MGI Symbol;Acc:MGI:2443965]
																ENSMUSG00000056116	24.522	30.156	25.999	117.414	172.326	120.155	26.8923	136.632	2.34503	6.17974e-50	3.72021e-46	H2-T22	Up	histocompatibility 2, T region locus 22 [Source:MGI Symbol;Acc:MGI:95956]
																ENSMUSG00000049109	0.268	0.071	0.053	0.451	0.441	1.099	0.130667	0.663667	2.34457	0.000884488	0.00700915	Themis	Up	thymocyte selection associated [Source:MGI Symbol;Acc:MGI:2443552]
																ENSMUSG00000092232	0	0.377	0.495	0.707	2.562	1.102	0.290667	1.457	2.32556	0.00742148	0.0374182	Gm20521	Up	predicted gene 20521 [Source:MGI Symbol;Acc:MGI:5141986]
																ENSMUSG00000053835	13.457	12.399	9.798	49.901	65.55	52.977	11.8847	56.1427	2.24	6.31521e-43	2.85132e-39	H2-T24	Up	histocompatibility 2, T region locus 24 [Source:MGI Symbol;Acc:MGI:95958]
																ENSMUSG00000024730	0.409	0.334	0.112	1.413	1.362	1.138	0.285	1.30433	2.19428	0.00988273	0.0464069	Ms4a8a	Up	membrane-spanning 4-domains, subfamily A, member 8A [Source:MGI Symbol;Acc:MGI:1927657]
																ENSMUSG00000095028	4.111	3.327	0.968	11.19	13.477	12.426	2.802	12.3643	2.14166	6.62338e-10	4.65441e-08	Sirpb1b	Up	signal-regulatory protein beta 1B [Source:MGI Symbol;Acc:MGI:3779828]
																ENSMUSG00000038580	1.747	1.187	1.432	8.608	6.019	4.634	1.45533	6.42033	2.1413	0.000172415	0.00189521	Sct	Up	secretin [Source:MGI Symbol;Acc:MGI:99466]
																ENSMUSG00000026580	1.545	1.023	0.458	3.577	6.303	3.058	1.00867	4.31267	2.09613	1.80283e-07	6.15485e-06	Selp	Up	selectin, platelet [Source:MGI Symbol;Acc:MGI:98280]
																ENSMUSG00000025498	108.349	20.787	19.784	211.856	233.568	181.471	49.64	208.965	2.07369	0.0106011	0.0489906	Irf7	Up	interferon regulatory factor 7 [Source:MGI Symbol;Acc:MGI:1859212]
																ENSMUSG00000079017	140.256	47.527	45.742	314.561	320.33	347.862	77.8417	327.584	2.07325	0.000191333	0.00204708	Ifi27l2a	Up	interferon, alpha-inducible protein 27 like 2A [Source:MGI Symbol;Acc:MGI:1924183]
																ENSMUSG00000005800	1.369	3.223	1.298	8.683	5.379	10.378	1.96333	8.14667	2.0529	1.77891e-10	1.49428e-08	Mmp8	Up	matrix metallopeptidase 8 [Source:MGI Symbol;Acc:MGI:1202395]
																ENSMUSG00000030156	0.459	0.288	0.868	2.461	2.369	1.871	0.538333	2.23367	2.05284	0.00093903	0.00735105	Cd69	Up	CD69 antigen [Source:MGI Symbol;Acc:MGI:88343]
																ENSMUSG00000038179	5.497	2.604	2.579	10.006	16.095	17.725	3.56	14.6087	2.03688	5.15718e-05	0.000719217	Slamf7	Up	SLAM family member 7 [Source:MGI Symbol;Acc:MGI:1922595]
																ENSMUSG00000021363	0.983	0.462	0.501	2.784	1.959	3.16	0.648667	2.63433	2.02189	3.78633e-06	8.31887e-05	Mak	Up	male germ cell-associated kinase [Source:MGI Symbol;Acc:MGI:96913]
																ENSMUSG00000027219	0.649	0.636	0.39	2.24	2.208	2.195	0.558333	2.21433	1.98767	4.85161e-07	1.40642e-05	Slc28a2	Up	solute carrier family 28 (sodium-coupled nucleoside transporter), member 2 [Source:MGI Symbol;Acc:MGI:1913105]
																ENSMUSG00000047686	0.675	1.183	0.575	2.998	3.746	2.542	0.811	3.09533	1.93232	5.9391e-08	2.32669e-06	Rtl3	Up	retrotransposon Gag like 3 [Source:MGI Symbol;Acc:MGI:2685221]
																ENSMUSG00000043263	3.427	1.098	1.175	5.021	10.785	5.549	1.9	7.11833	1.90554	7.28977e-06	0.000143413	Ifi209	Up	interferon activated gene 209 [Source:MGI Symbol;Acc:MGI:2138243]
																ENSMUSG00000021640	0.373	0.224	0.281	0.887	0.836	1.53	0.292667	1.08433	1.88948	0.00932423	0.0444785	Naip1	Up	NLR family, apoptosis inhibitory protein 1 [Source:MGI Symbol;Acc:MGI:1298223]
																ENSMUSG00000002944	29.695	43.745	20.876	126.061	85.456	135.969	31.4387	115.829	1.88138	9.49098e-10	6.34841e-08	Cd36	Up	CD36 molecule [Source:MGI Symbol;Acc:MGI:107899]
																ENSMUSG00000026582	0.301	0.531	0.041	0.593	1.287	1.217	0.291	1.03233	1.82682	0.00478947	0.0267878	Sele	Up	selectin, endothelial cell [Source:MGI Symbol;Acc:MGI:98278]
																ENSMUSG00000076612	4.381	4.87	5.773	13.551	26.888	11.98	5.008	17.473	1.80282	3.87609e-09	2.16725e-07	Ighg2c	Up	immunoglobulin heavy constant gamma 2C [Source:MGI Symbol;Acc:MGI:2686979]
																ENSMUSG00000042265	0.185	1.326	0.291	2.3	1.476	2.411	0.600667	2.06233	1.77964	0.000974378	0.00757197	Trem1	Up	triggering receptor expressed on myeloid cells 1 [Source:MGI Symbol;Acc:MGI:1930005]
																ENSMUSG00000078780	1.004	0.595	0.399	1.675	2.299	2.829	0.666	2.26767	1.76761	0.00367078	0.0218433	Gm5150	Up	predicted gene 5150 [Source:MGI Symbol;Acc:MGI:3779469]
																ENSMUSG00000031380	1.296	0.646	0.827	2.875	3.388	3.057	0.923	3.10667	1.75096	9.73369e-06	0.000182545	Vegfd	Up	vascular endothelial growth factor D [Source:MGI Symbol;Acc:MGI:108037]
																ENSMUSG00000028610	1.503	0.78	1.921	3.301	5.292	4.934	1.40133	4.509	1.68601	0.000108366	0.00130625	Dmrtb1	Up	DMRT-like family B with proline-rich C-terminal, 1 [Source:MGI Symbol;Acc:MGI:1927125]
																ENSMUSG00000039196	2.712	3.213	0.781	5.771	4.615	11.113	2.23533	7.16633	1.68075	0.000790369	0.00639805	Orm1	Up	orosomucoid 1 [Source:MGI Symbol;Acc:MGI:97443]
																ENSMUSG00000032122	21.537	18.711	22.042	71.266	50.18	77.527	20.7633	66.3243	1.6755	7.44678e-36	2.68978e-32	Slc37a2	Up	solute carrier family 37 (glycerol-3-phosphate transporter), member 2 [Source:MGI Symbol;Acc:MGI:1929693]
																ENSMUSG00000054892	0.455	0.266	0.268	1.303	0.931	0.916	0.329667	1.05	1.67131	0.00481466	0.0268705	Txk	Up	TXK tyrosine kinase [Source:MGI Symbol;Acc:MGI:102960]
																ENSMUSG00000036086	3.331	4.018	2.981	11.444	9.66	11.776	3.44333	10.96	1.67037	2.94125e-23	4.42658e-20	Zranb3	Up	zinc finger, RAN-binding domain containing 3 [Source:MGI Symbol;Acc:MGI:1918362]
																ENSMUSG00000042385	2.639	1.053	0.408	3.078	3.172	6.665	1.36667	4.305	1.65535	0.00389726	0.0228363	Gzmk	Up	granzyme K [Source:MGI Symbol;Acc:MGI:1298232]
																ENSMUSG00000034435	1.886	1.849	1.012	4.377	5.31	5.011	1.58233	4.89933	1.63053	6.08993e-09	3.19721e-07	Tmem30b	Up	transmembrane protein 30B [Source:MGI Symbol;Acc:MGI:2442082]
																ENSMUSG00000094420	4.314	2.495	1.686	4.254	12.013	9.97	2.83167	8.74567	1.62692	0.00517166	0.0283955	Igkv10-96	Up	immunoglobulin kappa variable 10-96 [Source:MGI Symbol;Acc:MGI:4439561]
																ENSMUSG00000020807	0.51	1.131	1.588	2.657	3.4	3.883	1.07633	3.31333	1.62216	1.12147e-07	4.01066e-06	4933427D14Rik	Up	RIKEN cDNA 4933427D14 gene [Source:MGI Symbol;Acc:MGI:1921727]
																ENSMUSG00000047746	1.615	1.615	0.966	4.651	3.665	4.442	1.39867	4.25267	1.60432	1.71457e-11	1.84316e-09	Fbxo40	Up	F-box protein 40 [Source:MGI Symbol;Acc:MGI:2443753]
																ENSMUSG00000026180	1.162	2.803	1.232	5.301	4.075	6.352	1.73233	5.24267	1.59758	1.64596e-07	5.66211e-06	Cxcr2	Up	C-X-C motif chemokine receptor 2 [Source:MGI Symbol;Acc:MGI:105303]
																ENSMUSG00000034028	1.106	0.551	0.815	2.072	2.629	2.764	0.824	2.48833	1.59446	0.00703659	0.0359696	Cd226	Up	CD226 antigen [Source:MGI Symbol;Acc:MGI:3039602]
																ENSMUSG00000048534	2.132	2.858	1.574	6.398	7.72	5.454	2.188	6.524	1.57614	5.8458e-09	3.07799e-07	Jaml	Up	junction adhesion molecule like [Source:MGI Symbol;Acc:MGI:2685484]
																ENSMUSG00000039109	10.109	13.442	6.336	36.475	23.517	28.768	9.96233	29.5867	1.57039	3.53721e-14	8.42538e-12	F13a1	Up	coagulation factor XIII, A1 subunit [Source:MGI Symbol;Acc:MGI:1921395]
																ENSMUSG00000079071	0.221	0.167	0.162	0.503	0.619	0.506	0.183333	0.542667	1.5656	0.0101973	0.047538	Slc28a2b	Up	solute carrier family 28 member 2b [Source:MGI Symbol;Acc:MGI:3702173]
																ENSMUSG00000043719	2.565	3.775	1.213	6.767	7.732	7.808	2.51767	7.43567	1.56237	0.000168996	0.00186443	Col6a6	Up	collagen, type VI, alpha 6 [Source:MGI Symbol;Acc:MGI:2444259]
																ENSMUSG00000029371	5.97	12.521	4.149	25.282	11.554	29.471	7.54667	22.1023	1.55029	0.00381273	0.0224806	Cxcl5	Up	C-X-C motif chemokine ligand 5 [Source:MGI Symbol;Acc:MGI:1096868]
																ENSMUSG00000024678	13.673	9.696	3.839	26.535	28.434	24.469	9.06933	26.4793	1.5458	0.00207056	0.0139718	Ms4a4d	Up	membrane-spanning 4-domains, subfamily A, member 4D [Source:MGI Symbol;Acc:MGI:1913857]
																ENSMUSG00000030117	1.406	1.358	0.968	4.004	4.207	2.632	1.244	3.61433	1.53874	1.41759e-05	0.00025026	Gdf3	Up	growth differentiation factor 3 [Source:MGI Symbol;Acc:MGI:95686]
																ENSMUSG00000026012	2.978	4.122	2.227	8.909	6.679	11.475	3.109	9.021	1.53684	1.01425e-11	1.15203e-09	Cd28	Up	CD28 antigen [Source:MGI Symbol;Acc:MGI:88327]
																ENSMUSG00000095609	6.422	3.685	1.455	11.713	9.841	11.741	3.854	11.0983	1.52591	1.78521e-05	0.00030416	Anxa2r1	Up	annexin A2 receptor 1 [Source:MGI Symbol;Acc:MGI:5434543]
																ENSMUSG00000051998	1.294	0.625	0.419	1.795	2.811	2.083	0.779333	2.22967	1.51652	0.0059038	0.0313781	Lax1	Up	lymphocyte transmembrane adaptor 1 [Source:MGI Symbol;Acc:MGI:2443362]
																ENSMUSG00000035459	2.184	1.75	0.732	5.184	3.405	4.683	1.55533	4.424	1.50813	2.33825e-06	5.49139e-05	Stab2	Up	stabilin 2 [Source:MGI Symbol;Acc:MGI:2178743]
																ENSMUSG00000033080	0.671	0.222	0.223	1.122	0.888	1.151	0.372	1.05367	1.50204	0.0036755	0.0218642	Vsx1	Up	visual system homeobox 1 [Source:MGI Symbol;Acc:MGI:1890816]
																ENSMUSG00000074677	8.739	8.062	5.604	19.629	23.408	19.502	7.46833	20.8463	1.48094	2.77311e-12	3.91268e-10	Sirpb1c	Up	signal-regulatory protein beta 1C [Source:MGI Symbol;Acc:MGI:3807521]
																ENSMUSG00000056054	21.17	26.968	16.435	66.894	41.555	70.653	21.5243	59.7007	1.47178	2.3283e-10	1.91132e-08	S100a8	Up	S100 calcium binding protein A8 (calgranulin A) [Source:MGI Symbol;Acc:MGI:88244]
																ENSMUSG00000070323	2.819	5.323	1.71	8.272	7.475	11.498	3.284	9.08167	1.4675	3.97275e-06	8.65476e-05	Mmp27	Up	matrix metallopeptidase 27 [Source:MGI Symbol;Acc:MGI:3039232]
																ENSMUSG00000042351	1.71	0.666	0.42	2.182	2.203	3.347	0.932	2.57733	1.46748	0.00403949	0.0234768	Grap2	Up	GRB2-related adaptor protein 2 [Source:MGI Symbol;Acc:MGI:1333842]
																ENSMUSG00000038508	6.412	5.801	3.699	9.539	14.851	19.238	5.304	14.5427	1.45514	6.97083e-08	2.65598e-06	Gdf15	Up	growth differentiation factor 15 [Source:MGI Symbol;Acc:MGI:1346047]
																ENSMUSG00000019851	21.593	21.745	15.437	51.529	44.349	63.888	19.5917	53.2553	1.44269	1.00989e-18	6.51381e-16	Perp	Up	PERP, TP53 apoptosis effector [Source:MGI Symbol;Acc:MGI:1929938]
																ENSMUSG00000056071	33.856	54.175	22.89	116.934	78.735	105.759	36.9737	100.476	1.44228	4.78299e-10	3.52575e-08	S100a9	Up	S100 calcium binding protein A9 (calgranulin B) [Source:MGI Symbol;Acc:MGI:1338947]
																ENSMUSG00000053687	5.988	7.913	3.697	17.67	15.117	14.991	5.866	15.926	1.44093	1.30585e-09	8.30409e-08	Dpep2	Up	dipeptidase 2 [Source:MGI Symbol;Acc:MGI:2442042]
																ENSMUSG00000049723	68.435	152.048	84.501	325.399	157.728	338.596	101.661	273.908	1.42992	0.000575956	0.00496742	Mmp12	Up	matrix metallopeptidase 12 [Source:MGI Symbol;Acc:MGI:97005]
																ENSMUSG00000053977	2.461	0.944	0.619	3.429	2.84	4.545	1.34133	3.60467	1.4262	0.000458114	0.00415547	Cd8a	Up	CD8 subunit alpha [Source:MGI Symbol;Acc:MGI:88346]
																ENSMUSG00000104876	0.544	0.28	0.157	0.96	0.789	0.868	0.327	0.872333	1.41559	0.00736357	0.0372406	Trdc	Up	T cell receptor delta, constant region [Source:MGI Symbol;Acc:MGI:98612]
																ENSMUSG00000037872	18.661	21.81	15.289	34.094	71.324	42.058	18.5867	49.1587	1.40318	1.55725e-09	9.63148e-08	Ackr1	Up	atypical chemokine receptor 1 (Duffy blood group) [Source:MGI Symbol;Acc:MGI:1097689]
																ENSMUSG00000044206	3.09	2.603	0.93	6.704	4.407	6.17	2.20767	5.76033	1.38363	0.000361456	0.00342133	Vsig4	Up	V-set and immunoglobulin domain containing 4 [Source:MGI Symbol;Acc:MGI:2679720]
																ENSMUSG00000041347	1.249	2.158	2.079	4.351	5.944	3.92	1.82867	4.73833	1.37359	0.000535755	0.00469373	Bdkrb1	Up	bradykinin receptor, beta 1 [Source:MGI Symbol;Acc:MGI:88144]
																ENSMUSG00000004709	1.965	1.076	0.869	2.978	3.497	3.629	1.30333	3.368	1.36969	1.13483e-05	0.000208494	Cd244a	Up	CD244 molecule A [Source:MGI Symbol;Acc:MGI:109294]
																ENSMUSG00000045362	2.312	3.341	1.699	5.478	6.774	6.66	2.45067	6.304	1.36309	2.51969e-08	1.10451e-06	Tnfrsf26	Up	tumor necrosis factor receptor superfamily, member 26 [Source:MGI Symbol;Acc:MGI:2651928]
																ENSMUSG00000089942	18.294	19.264	9.096	41.419	40.017	37.299	15.5513	39.5783	1.34767	3.69226e-11	3.62403e-09	Pira2	Up	paired-Ig-like receptor A2 [Source:MGI Symbol;Acc:MGI:1195970]
																ENSMUSG00000027398	7.424	13.567	6.426	27.756	13.265	28.457	9.139	23.1593	1.34149	1.31094e-06	3.3299e-05	Il1b	Up	interleukin 1 beta [Source:MGI Symbol;Acc:MGI:96543]
																ENSMUSG00000027940	187.606	142.016	104.547	370.371	367.447	359.752	144.723	365.857	1.33798	8.26023e-16	2.92509e-13	Tpm3	Up	tropomyosin 3, gamma [Source:MGI Symbol;Acc:MGI:1890149]
																ENSMUSG00000029084	28.79	39.162	23.427	69.36	77.587	82.671	30.4597	76.5393	1.3293	7.76018e-19	5.1982e-16	Cd38	Up	CD38 antigen [Source:MGI Symbol;Acc:MGI:107474]
																ENSMUSG00000062609	1.696	4.811	1.132	5.449	6.756	6.99	2.54633	6.39833	1.32927	2.82838e-06	6.4823e-05	Kcnj15	Up	potassium inwardly-rectifying channel, subfamily J, member 15 [Source:MGI Symbol;Acc:MGI:1310000]
																ENSMUSG00000047562	0.772	1.188	0.564	2.282	1.162	2.859	0.841333	2.101	1.32033	0.00830815	0.0407842	Mmp10	Up	matrix metallopeptidase 10 [Source:MGI Symbol;Acc:MGI:97007]
																ENSMUSG00000024399	7.916	3.835	1.982	12.414	9.975	11.86	4.57767	11.4163	1.31842	0.000363768	0.00343717	Ltb	Up	lymphotoxin B [Source:MGI Symbol;Acc:MGI:104796]
																ENSMUSG00000043613	123.711	228.27	95.82	384.163	239.924	489.371	149.267	371.153	1.31412	0.00177286	0.0122869	Mmp3	Up	matrix metallopeptidase 3 [Source:MGI Symbol;Acc:MGI:97010]
																ENSMUSG00000062515	35.683	41.737	24.042	80.482	68.676	99.864	33.8207	83.0073	1.29533	2.60521e-12	3.70473e-10	Fabp4	Up	fatty acid binding protein 4, adipocyte [Source:MGI Symbol;Acc:MGI:88038]
																ENSMUSG00000019987	11.31	13.433	9.423	32.13	22.86	28.397	11.3887	27.7957	1.28726	9.98305e-13	1.58152e-10	Arg1	Up	arginase, liver [Source:MGI Symbol;Acc:MGI:88070]
																ENSMUSG00000059994	4.781	2.971	4.77	7.982	11.068	11.257	4.174	10.1023	1.27519	3.48992e-07	1.07556e-05	Fcrl1	Up	Fc receptor-like 1 [Source:MGI Symbol;Acc:MGI:2442862]
																ENSMUSG00000066442	15.734	15.502	12.368	31.12	28.362	45.52	14.5347	35.0007	1.26788	1.46693e-09	9.22e-08	Mthfs	Up	5, 10-methenyltetrahydrofolate synthetase [Source:MGI Symbol;Acc:MGI:1340032]
																ENSMUSG00000079355	2.535	3.366	1.268	4.913	8.203	4.085	2.38967	5.73367	1.26265	0.000485615	0.00433525	Ackr4	Up	atypical chemokine receptor 4 [Source:MGI Symbol;Acc:MGI:2181676]
																ENSMUSG00000032556	2.796	5.499	6.408	12.275	9.873	12.988	4.901	11.712	1.25684	3.44359e-07	1.06492e-05	Bfsp2	Up	beaded filament structural protein 2, phakinin [Source:MGI Symbol;Acc:MGI:1333828]
																ENSMUSG00000026581	2.848	1.577	0.942	4.035	3.376	5.39	1.789	4.267	1.25407	0.00149635	0.0107666	Sell	Up	selectin, lymphocyte [Source:MGI Symbol;Acc:MGI:98279]
																ENSMUSG00000024910	4.051	2.132	1.95	5.802	6.018	7.571	2.711	6.46367	1.25353	0.000346701	0.00330912	Ctsw	Up	cathepsin W [Source:MGI Symbol;Acc:MGI:1338045]
																ENSMUSG00000026065	0.307	0.88	0.458	1.349	1.274	1.299	0.548333	1.30733	1.2535	0.00190319	0.0130071	Slc9a4	Up	solute carrier family 9 (sodium/hydrogen exchanger), member 4 [Source:MGI Symbol;Acc:MGI:105074]
																ENSMUSG00000033826	0.296	0.627	0.708	1.789	0.821	1.268	0.543667	1.29267	1.24956	0.00374765	0.0221983	Dnah8	Up	dynein, axonemal, heavy chain 8 [Source:MGI Symbol;Acc:MGI:107714]
																ENSMUSG00000008845	1.156	1.332	1.446	3.014	2.455	3.818	1.31133	3.09567	1.23922	7.92069e-07	2.15758e-05	Cd163	Up	CD163 antigen [Source:MGI Symbol;Acc:MGI:2135946]
																ENSMUSG00000048521	4.024	2.219	1.659	4.543	5.379	8.726	2.634	6.216	1.23873	0.000405539	0.00374822	Cxcr6	Up	C-X-C motif chemokine receptor 6 [Source:MGI Symbol;Acc:MGI:1934582]
																ENSMUSG00000036523	0.85	1.318	0.746	1.786	3.105	1.881	0.971333	2.25733	1.21658	0.000222618	0.0023093	Greb1	Up	gene regulated by estrogen in breast cancer protein [Source:MGI Symbol;Acc:MGI:2149712]
																ENSMUSG00000029380	22.869	31.544	30.731	62.389	43.818	90.253	28.3813	65.4867	1.20626	1.18241e-09	7.65389e-08	Cxcl1	Up	C-X-C motif chemokine ligand 1 [Source:MGI Symbol;Acc:MGI:108068]
																ENSMUSG00000027435	25.184	27.95	16.929	48.543	56.492	56.301	23.3543	53.7787	1.20334	4.3904e-15	1.32151e-12	Cd93	Up	CD93 antigen [Source:MGI Symbol;Acc:MGI:106664]
																ENSMUSG00000017737	3.415	2.84	0.877	4.192	7.289	4.861	2.37733	5.44733	1.19621	0.000773632	0.00629077	Mmp9	Up	matrix metallopeptidase 9 [Source:MGI Symbol;Acc:MGI:97011]
																ENSMUSG00000012519	7.222	5.275	3.613	11.744	12.449	12.667	5.37	12.2867	1.1941	4.68524e-07	1.36918e-05	Mlkl	Up	mixed lineage kinase domain-like [Source:MGI Symbol;Acc:MGI:1921818]
																ENSMUSG00000053063	34.218	31.105	16.597	64.025	46.928	74.358	27.3067	61.7703	1.17766	6.31523e-05	0.000844091	Clec12a	Up	C-type lectin domain family 12, member a [Source:MGI Symbol;Acc:MGI:3040968]
																ENSMUSG00000079247	0.844	2.182	0.547	2.12	3.475	2.479	1.191	2.69133	1.17615	0.00538241	0.0291473	Cwc22rt6	Up	CWC22 spliceosome-associated protein, retrotransposed 6 [Source:MGI Symbol;Acc:MGI:3702053]
																ENSMUSG00000094125	0.844	2.182	0.547	2.12	3.475	2.479	1.191	2.69133	1.17615	0.00538241	0.0291473	Cwc22rt1	Up	CWC22 spliceosome-associated protein, retrotransposed 1 [Source:MGI Symbol;Acc:MGI:3702072]
																ENSMUSG00000094336	0.844	2.182	0.547	2.12	3.475	2.479	1.191	2.69133	1.17615	0.00538241	0.0291473	Cwc22rt2	Up	CWC22 spliceosome-associated protein, retrotransposed 2 [Source:MGI Symbol;Acc:MGI:3702055]
																ENSMUSG00000095824	0.844	2.182	0.547	2.12	3.475	2.479	1.191	2.69133	1.17615	0.00538241	0.0291473	Cwc22rt7	Up	CWC22 spliceosome-associated protein, retrotransposed 7 [Source:MGI Symbol;Acc:MGI:3702070]
																ENSMUSG00000096337	0.844	2.182	0.547	2.12	3.475	2.479	1.191	2.69133	1.17615	0.00538241	0.0291473	Cwc22rt5	Up	CWC22 spliceosome-associated protein, retrotransposed 5 [Source:MGI Symbol;Acc:MGI:3702064]
																ENSMUSG00000096484	0.844	2.182	0.547	2.12	3.475	2.479	1.191	2.69133	1.17615	0.00538241	0.0291473	Cwc22rt4	Up	CWC22 spliceosome-associated protein, retrotransposed 4 [Source:MGI Symbol;Acc:MGI:3702068]
																ENSMUSG00000060131	1.92	1.678	0.804	3.188	3.12	3.529	1.46733	3.279	1.16006	5.60272e-05	0.000765307	Atp8b4	Up	ATPase, class I, type 8B, member 4 [Source:MGI Symbol;Acc:MGI:1859664]
																ENSMUSG00000025776	12.532	8.854	8.214	19.964	19.351	26.812	9.86667	22.0423	1.15964	4.76025e-11	4.59733e-09	Crispld1	Up	cysteine-rich secretory protein LCCL domain containing 1 [Source:MGI Symbol;Acc:MGI:1934666]
																ENSMUSG00000035385	32.93	33.87	23.221	55.42	62.491	82.819	30.007	66.91	1.15692	2.95669e-10	2.36274e-08	Ccl2	Up	C-C motif chemokine ligand 2 [Source:MGI Symbol;Acc:MGI:98259]
																ENSMUSG00000057058	2.317	1.852	0.574	3.431	2.842	4.277	1.581	3.51667	1.15337	0.00739962	0.0373601	Skap1	Up	src family associated phosphoprotein 1 [Source:MGI Symbol;Acc:MGI:1925723]
																ENSMUSG00000067049	1.848	2.244	0.871	3.247	4.502	3.278	1.65433	3.67567	1.15176	0.000551177	0.00479954	Unc93a	Up	unc-93 homolog A [Source:MGI Symbol;Acc:MGI:1933250]
																ENSMUSG00000079625	2.112	3.252	1.155	5.555	3.347	5.517	2.173	4.80633	1.14525	0.00389835	0.0228363	Tm4sf19	Up	transmembrane 4 L six family member 19 [Source:MGI Symbol;Acc:MGI:3645933]
																ENSMUSG00000026068	1.607	1.156	0.322	2.142	1.743	2.928	1.02833	2.271	1.14302	0.00438681	0.0249923	Il18rap	Up	interleukin 18 receptor accessory protein [Source:MGI Symbol;Acc:MGI:1338888]
																ENSMUSG00000035373	21.131	26.571	16.922	40.315	42.81	56.133	21.5413	46.4193	1.10762	4.82709e-09	2.61794e-07	Ccl7	Up	C-C motif chemokine ligand 7 [Source:MGI Symbol;Acc:MGI:99512]
																ENSMUSG00000024675	18.586	10.008	7.133	24.609	25.115	27.077	11.909	25.6003	1.10411	4.8256e-06	0.000100985	Ms4a4c	Up	membrane-spanning 4-domains, subfamily A, member 4C [Source:MGI Symbol;Acc:MGI:1927656]
																ENSMUSG00000026589	1.328	1.128	0.763	2.405	2.558	1.946	1.073	2.303	1.10186	0.000128416	0.00148286	Sec16b	Up	SEC16 homolog B, endoplasmic reticulum export factor [Source:MGI Symbol;Acc:MGI:2148802]
																ENSMUSG00000025473	44.139	44.315	28.991	84.401	75.156	92.118	39.1483	83.8917	1.09958	1.90946e-13	3.78955e-11	Adam8	Up	a disintegrin and metallopeptidase domain 8 [Source:MGI Symbol;Acc:MGI:107825]
																ENSMUSG00000042784	1.579	1.984	0.756	3.017	3.143	3.093	1.43967	3.08433	1.09922	0.00198043	0.0134633	Muc1	Up	mucin 1, transmembrane [Source:MGI Symbol;Acc:MGI:97231]
																ENSMUSG00000090698	0.961	1.18	1.154	2.141	2.448	2.446	1.09833	2.345	1.09427	0.000123442	0.00144296	Apold1	Up	apolipoprotein L domain containing 1 [Source:MGI Symbol;Acc:MGI:2685921]
																ENSMUSG00000030148	21.415	23.743	17.189	46.33	46.292	40.357	20.7823	44.3263	1.09281	1.5357e-09	9.53086e-08	Clec4a2	Up	C-type lectin domain family 4, member a2 [Source:MGI Symbol;Acc:MGI:1349412]
																ENSMUSG00000062783	0.841	0.929	1.335	1.388	3.532	1.687	1.035	2.20233	1.0894	0.00672814	0.0348267	Csprs	Up	component of Sp100-rs [Source:NCBI gene (formerly Entrezgene);Acc:114564]
																ENSMUSG00000039264	3.12	1.033	1.241	3.419	4.058	3.981	1.798	3.81933	1.08693	0.00507232	0.0279884	Gimap3	Up	GTPase, IMAP family member 3 [Source:MGI Symbol;Acc:MGI:1932723]
																ENSMUSG00000050921	1.272	0.625	0.582	1.802	1.758	1.704	0.826333	1.75467	1.0864	0.00667659	0.0345995	P2ry10	Up	purinergic receptor P2Y, G-protein coupled 10 [Source:MGI Symbol;Acc:MGI:1926076]
																ENSMUSG00000000317	2.827	2.429	2.265	4.991	4.781	6.181	2.507	5.31767	1.08483	5.91812e-07	1.66741e-05	Bcl6b	Up	B cell CLL/lymphoma 6, member B [Source:MGI Symbol;Acc:MGI:1278332]
																ENSMUSG00000056888	49.849	55.912	48.077	104.22	104.524	117.372	51.2793	108.705	1.08397	8.67463e-22	1.11903e-18	Glipr1	Up	GLI pathogenesis related 1 [Source:MGI Symbol;Acc:MGI:1920940]
																ENSMUSG00000043832	25.189	30.834	15.36	49.932	54.87	46.027	23.7943	50.2763	1.07926	9.09913e-09	4.527e-07	Clec4a3	Up	C-type lectin domain family 4, member a3 [Source:MGI Symbol;Acc:MGI:1920399]
																ENSMUSG00000079362	18.359	6.993	12.5	26.385	27.611	25.923	12.6173	26.6397	1.07817	0.00484142	0.0269698	Gm43302	Up	predicted gene 43302 [Source:MGI Symbol;Acc:MGI:5663439]
																ENSMUSG00000002847	20.624	21.746	13.733	33.657	38.899	45.895	18.701	39.4837	1.07814	4.29014e-10	3.18848e-08	Pla1a	Up	phospholipase A1 member A [Source:MGI Symbol;Acc:MGI:1934677]
																ENSMUSG00000030413	4.782	5.371	4.359	10.375	9.094	11.12	4.83733	10.1963	1.07577	0.000508055	0.00450441	Pglyrp1	Up	peptidoglycan recognition protein 1 [Source:MGI Symbol;Acc:MGI:1345092]
																ENSMUSG00000055368	0.976	0.38	0.625	1.762	1.034	1.378	0.660333	1.39133	1.0752	0.00267427	0.0170964	Slc6a2	Up	solute carrier family 6 (neurotransmitter transporter, noradrenalin), member 2 [Source:MGI Symbol;Acc:MGI:1270850]
																ENSMUSG00000032739	2.137	1.378	1.275	2.873	4.301	2.897	1.59667	3.357	1.07211	0.00161391	0.0114213	Pram1	Up	PML-RAR alpha-regulated adaptor molecule 1 [Source:MGI Symbol;Acc:MGI:3576625]
																ENSMUSG00000014543	1.766	2.738	1.424	3.956	4.251	4.23	1.976	4.14567	1.06902	0.00473177	0.0265539	Klra17	Up	killer cell lectin-like receptor, subfamily A, member 17 [Source:MGI Symbol;Acc:MGI:2180674]
																ENSMUSG00000029082	4.684	5.069	2.119	7.487	9.27	8.146	3.95733	8.301	1.06876	6.40434e-06	0.000128657	Bst1	Up	bone marrow stromal cell antigen 1 [Source:MGI Symbol;Acc:MGI:105370]
																ENSMUSG00000029254	1.757	3.087	4.146	8.546	4.364	5.93	2.99667	6.28	1.06741	0.00132237	0.00970814	Stap1	Up	signal transducing adaptor family member 1 [Source:MGI Symbol;Acc:MGI:1926193]
																ENSMUSG00000033852	0.516	0.312	0.578	1.065	1.27	0.605	0.468667	0.98	1.06422	0.00520308	0.0284923	Gm28042	Up	predicted gene, 28042 [Source:MGI Symbol;Acc:MGI:5547778]
																ENSMUSG00000004707	74.967	74.575	53.567	125.992	150.751	147.61	67.703	141.451	1.06301	5.47348e-15	1.52261e-12	Ly9	Up	lymphocyte antigen 9 [Source:MGI Symbol;Acc:MGI:96885]
																ENSMUSG00000040809	8.842	9.141	3.696	12.618	19.821	12.718	7.22633	15.0523	1.05865	0.000222301	0.00230733	Chil3	Up	chitinase-like 3 [Source:MGI Symbol;Acc:MGI:1330860]
																ENSMUSG00000026073	0.858	3.135	1.795	3.844	2.924	5.281	1.92933	4.01633	1.05778	0.00833981	0.0408861	Il1r2	Up	interleukin 1 receptor, type II [Source:MGI Symbol;Acc:MGI:96546]
																ENSMUSG00000026228	13.017	17.212	9.923	26.939	23.121	33.332	13.384	27.7973	1.05444	1.01643e-09	6.74876e-08	Htr2b	Up	5-hydroxytryptamine (serotonin) receptor 2B [Source:MGI Symbol;Acc:MGI:109323]
																ENSMUSG00000043740	6.901	11.013	6.922	19.477	10.504	21.395	8.27867	17.1253	1.04866	1.28942e-08	6.14752e-07	Trem6l	Up	triggering receptor expressed on myeloid cells-like 6 [Source:MGI Symbol;Acc:MGI:2443478]
																ENSMUSG00000029553	5.695	4.239	3.386	10.484	8.704	8.324	4.44	9.17067	1.04647	4.35792e-05	0.000629129	Tfec	Up	transcription factor EC [Source:MGI Symbol;Acc:MGI:1333760]
																ENSMUSG00000095115	22.045	26.781	19.003	45.895	39.761	53.798	22.6097	46.4847	1.03982	8.54588e-16	2.96805e-13	Itpripl2	Up	inositol 1,4,5-triphosphate receptor interacting protein-like 2 [Source:MGI Symbol;Acc:MGI:2442416]
																ENSMUSG00000069515	29.474	59.422	22.182	82.133	82.478	63.637	37.026	76.0827	1.03903	0.00941454	0.0448382	Lyz1	Up	lysozyme 1 [Source:MGI Symbol;Acc:MGI:96902]
																ENSMUSG00000041488	12.615	9.324	7.476	20.46	19.687	20.239	9.805	20.1287	1.03766	1.54415e-08	7.11414e-07	Stx3	Up	syntaxin 3 [Source:MGI Symbol;Acc:MGI:103077]
																ENSMUSG00000074896	69.989	60.368	34.974	102.13	138.317	98.547	55.1103	112.998	1.0359	0.00145714	0.0105344	Ifit3	Up	interferon-induced protein with tetratricopeptide repeats 3 [Source:MGI Symbol;Acc:MGI:1101055]
																ENSMUSG00000002204	13.119	7.862	6.749	14.756	22.049	19.932	9.24333	18.9123	1.03284	2.81537e-05	0.00044732	Napsa	Up	napsin A aspartic peptidase [Source:MGI Symbol;Acc:MGI:109365]
																ENSMUSG00000029695	1.345	1.819	2.289	2.46	3.979	4.684	1.81767	3.70767	1.02842	0.000862189	0.00686861	Aass	Up	aminoadipate-semialdehyde synthase [Source:MGI Symbol;Acc:MGI:1353573]
																ENSMUSG00000001128	51.73	45.863	22.932	77.287	72.91	95.371	40.175	81.856	1.02679	0.00341526	0.0207466	Cfp	Up	complement factor properdin [Source:MGI Symbol;Acc:MGI:97545]
																ENSMUSG00000039193	1.055	1.092	0.441	1.946	1.493	1.825	0.862667	1.75467	1.02432	0.0017762	0.0122999	Nlrc4	Up	NLR family, CARD domain containing 4 [Source:MGI Symbol;Acc:MGI:3036243]
																ENSMUSG00000022652	0.836	0.908	0.755	2.58	1.105	1.396	0.833	1.69367	1.02376	0.0106273	0.0490743	Morc1	Up	microrchidia 1 [Source:MGI Symbol;Acc:MGI:1316740]
																ENSMUSG00000050232	3.579	2.014	0.979	3.466	5.165	4.717	2.19067	4.44933	1.02222	0.0101199	0.0472749	Cxcr3	Up	C-X-C motif chemokine receptor 3 [Source:MGI Symbol;Acc:MGI:1277207]
																ENSMUSG00000074766	3.247	2.191	1.878	3.239	7.027	4.566	2.43867	4.944	1.01959	0.000833884	0.00668736	Ism1	Up	isthmin 1, angiogenesis inhibitor [Source:MGI Symbol;Acc:MGI:2442963]
																ENSMUSG00000026832	2.535	2.322	1.188	4.035	4.39	3.808	2.015	4.07767	1.01696	2.61521e-05	0.000419083	Cytip	Up	cytohesin 1 interacting protein [Source:MGI Symbol;Acc:MGI:2183535]
																ENSMUSG00000059430	2.739	2.528	3.268	4.665	8.24	4.321	2.845	5.742	1.01312	0.00303002	0.0189219	Actg2	Up	actin, gamma 2, smooth muscle, enteric [Source:MGI Symbol;Acc:MGI:104589]
																ENSMUSG00000068876	1.493	0.993	1.219	2.611	2.72	2.141	1.235	2.49067	1.01202	9.47033e-05	0.00117288	Cgn	Up	cingulin [Source:MGI Symbol;Acc:MGI:1927237]
																ENSMUSG00000024672	133.536	149.043	87.535	243.739	246.158	256.475	123.371	248.791	1.01193	1.45576e-11	1.60311e-09	Ms4a7	Up	membrane-spanning 4-domains, subfamily A, member 7 [Source:MGI Symbol;Acc:MGI:1918846]
																ENSMUSG00000032487	5.789	7.885	6.278	10.731	15.236	14.216	6.65067	13.3943	1.01005	3.16349e-10	2.49487e-08	Ptgs2	Up	prostaglandin-endoperoxide synthase 2 [Source:MGI Symbol;Acc:MGI:97798]
																ENSMUSG00000030162	0.929	1.851	2.283	3.726	3.269	3.194	1.68767	3.39633	1.00895	3.90761e-06	8.53343e-05	Olr1	Up	oxidized low density lipoprotein (lectin-like) receptor 1 [Source:MGI Symbol;Acc:MGI:1261434]
																ENSMUSG00000030433	4.666	2.869	2.085	4.498	6.321	8.485	3.20667	6.43467	1.00479	0.00248492	0.0161838	Sbk2	Up	SH3-binding domain kinase family, member 2 [Source:MGI Symbol;Acc:MGI:2685925]
																ENSMUSG00000026921	31.399	21.259	20.993	47.821	53.221	46.486	24.5503	49.176	1.00221	1.4703e-09	9.22e-08	Egfl7	Up	EGF-like domain 7 [Source:MGI Symbol;Acc:MGI:2449923]
																ENSMUSG00000062939	1.5	0.813	0.777	2.049	1.764	2.368	1.03	2.06033	1.00023	0.00544051	0.0294179	Stat4	Up	signal transducer and activator of transcription 4 [Source:MGI Symbol;Acc:MGI:103062]
																ENSMUSG00000079278	0	5.583	30.682	0	0	0	12.0883	0.001	-13.5613	0.00780345	0.038931	Tmem233	Down	transmembrane protein 233 [Source:MGI Symbol;Acc:MGI:3651514]
																ENSMUSG00000034533	0.019	6.109	28.983	0	0	0	11.7037	0.001	-13.5147	0.000168767	0.00186304	Scn10a	Down	sodium channel, voltage-gated, type X, alpha [Source:MGI Symbol;Acc:MGI:108029]
																ENSMUSG00000051207	0.141	1.836	8.16	0	0	0	3.379	0.001	-11.7224	0.000194913	0.00207923	Mrgprd	Down	MAS-related GPR, member D [Source:MGI Symbol;Acc:MGI:3033142]
																ENSMUSG00000078889	3.234	0.223	4.324	0	0	0	2.59367	0.001	-11.3408	0.00087368	0.00694483	Gm14288	Down	predicted gene 14288 [Source:MGI Symbol;Acc:MGI:3706570]
																ENSMUSG00000068327	0.09	0.775	4.808	0	0	0	1.891	0.001	-10.8849	0.00578432	0.0308793	Tlx2	Down	T cell leukemia, homeobox 2 [Source:MGI Symbol;Acc:MGI:1350935]
																ENSMUSG00000029019	0.283	0.616	3.874	0	0	0	1.591	0.001	-10.6357	0.00045431	0.00412511	Nppb	Down	natriuretic peptide type B [Source:MGI Symbol;Acc:MGI:97368]
																ENSMUSG00000034683	0	5.026	24.542	0	0.04	0	9.856	0.0133333	-9.52982	0.00649212	0.0338475	Ppp1r1c	Down	protein phosphatase 1, regulatory inhibitor subunit 1C [Source:MGI Symbol;Acc:MGI:1923185]
																ENSMUSG00000042474	0.553	0.15	0.454	0	0	0	0.385667	0.001	-8.59121	0.0068533	0.0353226	Fcmr	Down	Fc fragment of IgM receptor [Source:MGI Symbol;Acc:MGI:1916419]
																ENSMUSG00000034115	0.057	4.484	19.261	0.019	0.018	0.038	7.934	0.025	-8.30998	4.25e-06	9.06e-05	Scn11a	Down	sodium channel, voltage-gated, type XI, alpha [Source:MGI Symbol;Acc:MGI:1345149]
																ENSMUSG00000044309	0.483	0.233	0.117	0	0	0	0.277667	0.001	-8.11721	0.00951469	0.0451587	Apol7c	Down	apolipoprotein L 7c [Source:MGI Symbol;Acc:MGI:1920912]
																ENSMUSG00000032899	0.327	0.356	0.143	0	0	0	0.275333	0.001	-8.10504	0.000719231	0.00593932	Styk1	Down	serine/threonine/tyrosine kinase 1 [Source:MGI Symbol;Acc:MGI:2141396]
																ENSMUSG00000032318	0.239	3.968	14.178	0.071	0	0.06	6.12833	0.0436667	-7.13282	8.89e-05	0.00111994	Isl2	Down	insulin related protein 2 (islet 2) [Source:MGI Symbol;Acc:MGI:109156]
																ENSMUSG00000048070	0.395	9.076	39.85	0.078	0.2	0.08	16.4403	0.119333	-7.1061	2.55e-06	5.91e-05	Pirt	Down	phosphoinositide-interacting regulator of transient receptor potential channels [Source:MGI Symbol;Acc:MGI:2443635]
																ENSMUSG00000028072	0.171	2.37	13.047	0.169	0	0	5.196	0.0563333	-6.52727	0.00372613	0.022107	Ntrk1	Down	neurotrophic tyrosine kinase, receptor, type 1 [Source:MGI Symbol;Acc:MGI:97383]
																ENSMUSG00000058126	86.727	105.222	116.164	1.215	1.207	1.253	102.704	1.225	-6.38957	2.84e-195	5.12e-191	Tpm3-rs7	Down	tropomyosin 3, related sequence 7 [Source:MGI Symbol;Acc:MGI:99705]
																ENSMUSG00000036251	0.03	0.583	1.461	0	0.025	0	0.691333	0.00833333	-6.37434	6.22e-05	0.000833678	Trpm8	Down	transient receptor potential cation channel, subfamily M, member 8 [Source:MGI Symbol;Acc:MGI:2181435]
																ENSMUSG00000078249	75.341	8.345	17.018	0.388	0.522	0.358	33.568	0.422667	-6.31142	1.75e-28	3.94e-25	Hmga1b	Down	high mobility group AT-hook 1B [Source:MGI Symbol;Acc:MGI:96161]
																ENSMUSG00000091204	0.265	1.723	7.24	0	0	0.134	3.076	0.0446667	-6.10571	0.000344199	0.00329424	Exoc1l	Down	exocyst complex component 1 like [Source:MGI Symbol;Acc:MGI:3647743]
																ENSMUSG00000062168	0.134	0.775	13.574	0	0.127	0.132	4.82767	0.0863333	-5.80526	0.00490281	0.0272445	Ppef1	Down	protein phosphatase with EF hand calcium-binding domain 1 [Source:MGI Symbol;Acc:MGI:1097157]
																ENSMUSG00000087303	1.066	0.165	1.047	0.05	0	0	0.759333	0.0166667	-5.5097	0.00033451	0.00321639	Lipo2	Down	lipase, member O2 [Source:MGI Symbol;Acc:MGI:3644466]
																ENSMUSG00000045027	2.59	2.27	2.377	0.165	0	0	2.41233	0.055	-5.45485	4.51e-06	9.54e-05	Prss22	Down	serine protease 22 [Source:MGI Symbol;Acc:MGI:1918085]
																ENSMUSG00000005952	0.066	1.896	9.006	0.065	0.126	0.067	3.656	0.086	-5.40979	0.000383924	0.00358514	Trpv1	Down	transient receptor potential cation channel, subfamily V, member 1 [Source:MGI Symbol;Acc:MGI:1341787]
																ENSMUSG00000027071	0.244	5.176	24.845	0.332	0.298	0.123	10.0883	0.251	-5.32886	0.000284841	0.00282185	P2rx3	Down	purinergic receptor P2X, ligand-gated ion channel, 3 [Source:MGI Symbol;Acc:MGI:1097160]
																ENSMUSG00000048349	0.199	1.082	5.908	0.049	0.047	0.101	2.39633	0.0656667	-5.18952	0.000139263	0.00158381	Pou4f1	Down	POU domain, class 4, transcription factor 1 [Source:MGI Symbol;Acc:MGI:102525]
																ENSMUSG00000053030	0.877	1.715	3.279	0	0.167	0	1.957	0.0556667	-5.13569	0.00135349	0.00990842	Spink2	Down	serine peptidase inhibitor, Kazal type 2 [Source:MGI Symbol;Acc:MGI:1917232]
																ENSMUSG00000054169	26.572	19.477	47.837	1.77	0.602	0.427	31.2953	0.933	-5.06793	1.28e-12	1.9e-10	Ceacam10	Down	CEA cell adhesion molecule 10 [Source:MGI Symbol;Acc:MGI:1347248]
																ENSMUSG00000030703	14.937	12.36	1.265	0.095	0.367	0.39	9.52067	0.284	-5.0671	1.42e-05	0.00025026	Gdpd3	Down	glycerophosphodiester phosphodiesterase domain containing 3 [Source:MGI Symbol;Acc:MGI:1915866]
																ENSMUSG00000025432	0.474	9.792	51.434	0.647	0.763	0.443	20.5667	0.617667	-5.05734	0.000515382	0.00455371	Avil	Down	advillin [Source:MGI Symbol;Acc:MGI:1333798]
																ENSMUSG00000046275	1.039	7.939	34.488	0.264	0.319	0.745	14.4887	0.442667	-5.03256	7.1e-05	0.000929916	Trarg1	Down	trafficking regulator of GLUT4 (SLC2A4) 1 [Source:MGI Symbol;Acc:MGI:3029307]
																ENSMUSG00000024497	0.102	0.387	1.007	0	0.048	0	0.498667	0.016	-4.96193	0.00331795	0.0202881	Pou4f3	Down	POU domain, class 4, transcription factor 3 [Source:MGI Symbol;Acc:MGI:102523]
																ENSMUSG00000029193	0.113	0.41	2.767	0.074	0.036	0	1.09667	0.0366667	-4.90251	0.000104762	0.0012715	Cckar	Down	cholecystokinin A receptor [Source:MGI Symbol;Acc:MGI:99478]
																ENSMUSG00000001566	0.394	0.75	0.162	0.049	0	0	0.435333	0.0163333	-4.73623	0.00420739	0.0241915	Mnx1	Down	motor neuron and pancreas homeobox 1 [Source:MGI Symbol;Acc:MGI:109160]
																ENSMUSG00000046500	0.101	1.208	6.244	0.05	0.144	0.102	2.51767	0.0986667	-4.67338	0.00240812	0.0157861	Tafa4	Down	TAFA chemokine like family member 4 [Source:MGI Symbol;Acc:MGI:2444563]
																ENSMUSG00000032269	0.111	1.029	5.118	0.055	0.106	0.113	2.086	0.0913333	-4.51345	3.56e-05	0.000539879	Htr3a	Down	5-hydroxytryptamine (serotonin) receptor 3A [Source:MGI Symbol;Acc:MGI:96282]
																ENSMUSG00000050368	0.487	1.258	1.599	0	0.058	0.123	1.11467	0.0603333	-4.20751	0.00025345	0.00257297	Hoxd10	Down	homeobox D10 [Source:MGI Symbol;Acc:MGI:96202]
																ENSMUSG00000042258	0.264	0.143	1.774	0.087	0.042	0	0.727	0.043	-4.07955	0.00217939	0.0145346	Isl1	Down	ISL1 transcription factor, LIM/homeodomain [Source:MGI Symbol;Acc:MGI:101791]
																ENSMUSG00000018362	26.026	15.963	7.25	0.652	0	2.309	16.413	0.987	-4.05565	0.00861709	0.0419586	Kpna2	Down	karyopherin subunit alpha 2 [Source:MGI Symbol;Acc:MGI:103561]
																ENSMUSG00000032303	0.177	0.62	2.058	0.105	0.067	0	0.951667	0.0573333	-4.05301	0.000108134	0.00130454	Chrna3	Down	cholinergic receptor, nicotinic, alpha polypeptide 3 [Source:MGI Symbol;Acc:MGI:87887]
																ENSMUSG00000059412	2.626	12.938	87.701	2.935	2.829	0.622	34.4217	2.12867	-4.01529	0.00380221	0.0224405	Fxyd2	Down	FXYD domain-containing ion transport regulator 2 [Source:MGI Symbol;Acc:MGI:1195260]
																ENSMUSG00000120166	2.123	6.414	1.862	0.117	0.189	0.361	3.46633	0.222333	-3.96261	7.67e-11	7.07e-09	Zfp33b	Down	zinc finger protein 33B [Source:MGI Symbol;Acc:MGI:1916873]
																ENSMUSG00000036062	4.761	19.925	75.982	2.602	2.101	1.871	33.556	2.19133	-3.93669	0.000144888	0.00163645	Phf24	Down	PHD finger protein 24 [Source:MGI Symbol;Acc:MGI:2140712]
																ENSMUSG00000030669	15.024	52.86	239.709	8.895	5.235	6.147	102.531	6.759	-3.92311	0.000269962	0.00270261	Calca	Down	calcitonin/calcitonin-related polypeptide, alpha [Source:MGI Symbol;Acc:MGI:2151253]
																ENSMUSG00000094500	1.696	1.434	2.474	0.372	0	0	1.868	0.124	-3.91308	0.00638196	0.0334373	Smim18	Down	small integral membrane protein 18 [Source:MGI Symbol;Acc:MGI:1919882]
																ENSMUSG00000027597	15.38	32.668	13.758	1.11	1.376	1.689	20.602	1.39167	-3.8879	2.02e-34	6.09e-31	Ahcy	Down	S-adenosylhomocysteine hydrolase [Source:MGI Symbol;Acc:MGI:87968]
																ENSMUSG00000025370	0.094	0.832	1.128	0.075	0.036	0.032	0.684667	0.0476667	-3.84435	0.000459615	0.00416072	Cdh9	Down	cadherin 9 [Source:MGI Symbol;Acc:MGI:107433]
																ENSMUSG00000000214	0.715	2.104	13.138	0.242	0.337	0.551	5.319	0.376667	-3.81979	0.000450009	0.00409222	Th	Down	tyrosine hydroxylase [Source:MGI Symbol;Acc:MGI:98735]
																ENSMUSG00000023484	16.937	51.252	140.878	7.064	3.113	5.205	69.689	5.12733	-3.76465	6.56e-06	0.000131171	Prph	Down	peripherin [Source:MGI Symbol;Acc:MGI:97774]
																ENSMUSG00000075316	0.495	1.918	6.63	0.344	0.322	0.087	3.01433	0.251	-3.58608	0.00145833	0.010535	Scn9a	Down	sodium channel, voltage-gated, type IX, alpha [Source:MGI Symbol;Acc:MGI:107636]
																ENSMUSG00000061126	0.221	0.236	2.774	0.167	0.08	0.07	1.077	0.105667	-3.34943	0.00174356	0.0121344	Cyp4f39	Down	cytochrome P450, family 4, subfamily f, polypeptide 39 [Source:MGI Symbol;Acc:MGI:2445210]
																ENSMUSG00000010080	0.484	1.053	1.558	0.14	0.081	0.086	1.03167	0.102333	-3.33363	3.78e-06	8.31e-05	Epn3	Down	epsin 3 [Source:MGI Symbol;Acc:MGI:1919139]
																ENSMUSG00000004552	73.787	113.74	89.142	17.806	4.75	5.314	92.223	9.29	-3.31138	2.8e-07	8.9e-06	Ctse	Down	cathepsin E [Source:MGI Symbol;Acc:MGI:107361]
																ENSMUSG00000070369	4.648	5.456	3.953	0.459	0.723	0.242	4.68567	0.474667	-3.30327	3.59e-23	4.99e-20	Itgad	Down	integrin, alpha D [Source:MGI Symbol;Acc:MGI:3578624]
																ENSMUSG00000022342	0.101	0.301	1.517	0.124	0.048	0.025	0.639667	0.0656667	-3.28409	0.00140094	0.0101979	Kcnv1	Down	potassium channel, subfamily V, member 1 [Source:MGI Symbol;Acc:MGI:1914748]
																ENSMUSG00000058057	0.201	0.364	2.491	0.132	0.064	0.135	1.01867	0.110333	-3.20674	0.00692869	0.0355691	Tmt1a3	Down	thiol methyltransferase 1A3 [Source:MGI Symbol;Acc:MGI:3710670]
																ENSMUSG00000096351	1.08	1.497	2.23	0.149	0.241	0.153	1.60233	0.181	-3.14611	2.4e-05	0.000389815	Samd11	Down	sterile alpha motif domain containing 11 [Source:MGI Symbol;Acc:MGI:2446220]
																ENSMUSG00000024957	0.538	0.648	1.813	0.128	0	0.217	0.999667	0.115	-3.11981	0.0100789	0.0471612	Kcnk4	Down	potassium channel, subfamily K, member 4 [Source:MGI Symbol;Acc:MGI:1298234]
																ENSMUSG00000022935	1.374	3.922	14.431	0.532	0.708	1.035	6.57567	0.758333	-3.11623	0.00108042	0.00821229	Grik1	Down	glutamate receptor, ionotropic, kainate 1 [Source:MGI Symbol;Acc:MGI:95814]
																ENSMUSG00000030666	3.22	7.375	23.525	1.588	1.312	1.395	11.3733	1.43167	-2.98989	3.77e-07	1.14e-05	Calcb	Down	calcitonin-related polypeptide, beta [Source:MGI Symbol;Acc:MGI:2151254]
																ENSMUSG00000040610	0.289	0.706	4.658	0.356	0.069	0.292	1.88433	0.239	-2.97897	0.00303945	0.0189552	Tlx3	Down	T cell leukemia, homeobox 3 [Source:MGI Symbol;Acc:MGI:1351209]
																ENSMUSG00000000766	0.24	0.408	0.827	0.093	0	0.095	0.491667	0.0626667	-2.97191	0.00535098	0.0290899	Oprm1	Down	opioid receptor, mu 1 [Source:MGI Symbol;Acc:MGI:97441]
																ENSMUSG00000025221	1.589	5.823	22.146	1.306	1.025	1.47	9.85267	1.267	-2.9591	0.00306084	0.019055	Kcnip2	Down	Kv channel-interacting protein 2 [Source:MGI Symbol;Acc:MGI:2135916]
																ENSMUSG00000078496	3.164	1.969	3.163	0.088	0.676	0.36	2.76533	0.374667	-2.88377	2.06e-05	0.000342693	Zfp982	Down	zinc finger protein 982 [Source:MGI Symbol;Acc:MGI:3701121]
																ENSMUSG00000039518	1.776	1.033	1.446	0.285	0.196	0.125	1.41833	0.202	-2.81177	1.34e-05	0.000237863	Cdsn	Down	corneodesmosin [Source:MGI Symbol;Acc:MGI:3505689]
																ENSMUSG00000042448	0.535	0.517	2.6	0.059	0.113	0.36	1.21733	0.177333	-2.77919	0.00404019	0.0234768	Hoxd1	Down	homeobox D1 [Source:MGI Symbol;Acc:MGI:96201]
																ENSMUSG00000022269	0.867	1.3	2.011	0.378	0.154	0.082	1.39267	0.204667	-2.7665	0.00133594	0.00979184	Marchf11	Down	membrane associated ring-CH-type finger 11 [Source:MGI Symbol;Acc:MGI:3608327]
																ENSMUSG00000075707	1.117	2.286	0.877	0.163	0.145	0.331	1.42667	0.213	-2.74372	0.00123717	0.00917214	Dio3	Down	deiodinase, iodothyronine type III [Source:MGI Symbol;Acc:MGI:1306782]
																ENSMUSG00000046834	0.901	0.588	1.43	0.044	0.171	0.228	0.973	0.147667	-2.7201	0.000941796	0.00736313	Krt1	Down	keratin 1 [Source:MGI Symbol;Acc:MGI:96698]
																ENSMUSG00000036832	0.808	2.001	5.796	0.354	0.598	0.409	2.86833	0.453667	-2.66051	3.69e-05	0.000553232	Lpar3	Down	lysophosphatidic acid receptor 3 [Source:MGI Symbol;Acc:MGI:1929469]
																ENSMUSG00000051401	0.456	0.483	1.575	0.24	0	0.169	0.838	0.136333	-2.61981	0.000463104	0.00417835	Kctd16	Down	potassium channel tetramerisation domain containing 16 [Source:MGI Symbol;Acc:MGI:1914659]
																ENSMUSG00000028004	0.368	0.317	1.965	0.098	0.136	0.203	0.883333	0.145667	-2.60029	0.00221987	0.0147556	Npy2r	Down	neuropeptide Y receptor Y2 [Source:MGI Symbol;Acc:MGI:108418]
																ENSMUSG00000042581	0.231	0.329	0.467	0.088	0.068	0.018	0.342333	0.058	-2.56128	0.00226599	0.0150124	Thsd7b	Down	thrombospondin, type I, domain containing 7B [Source:MGI Symbol;Acc:MGI:2443925]
																ENSMUSG00000001420	0.692	2.294	5.748	0.111	0.693	0.697	2.91133	0.500333	-2.54072	0.000758608	0.00618252	Tmem79	Down	transmembrane protein 79 [Source:MGI Symbol;Acc:MGI:1919163]
																ENSMUSG00000078235	1.316	2.171	5.611	0.627	0.561	0.413	3.03267	0.533667	-2.50658	9.21e-06	0.000175176	Fam43b	Down	family with sequence similarity 43, member B [Source:MGI Symbol;Acc:MGI:3651622]
																ENSMUSG00000103255	0.11	0.43	1.453	0.063	0.154	0.139	0.664333	0.118667	-2.48499	0.00413054	0.0238483	Pcdhac1	Down	protocadherin alpha subfamily C, 1 [Source:MGI Symbol;Acc:MGI:1891442]
																ENSMUSG00000002228	1.864	3.214	12.095	1.268	1.284	0.585	5.72433	1.04567	-2.45268	5.11e-05	0.000713899	Ppm1j	Down	protein phosphatase 1J [Source:MGI Symbol;Acc:MGI:1919137]
																ENSMUSG00000020268	3.812	3.02	3.922	0.647	0.521	0.815	3.58467	0.661	-2.43912	1.06e-09	7.02e-08	Lyrm7	Down	LYR motif containing 7 [Source:MGI Symbol;Acc:MGI:1922780]
																ENSMUSG00000031937	1.834	3.02	7.841	1.151	0.634	0.562	4.23167	0.782333	-2.43537	1.09e-05	0.000201433	Vstm5	Down	V-set and transmembrane domain containing 5 [Source:MGI Symbol;Acc:MGI:1916387]
																ENSMUSG00000032502	1.899	2.326	10.116	0.578	1.126	0.961	4.78033	0.888333	-2.42794	1.36e-05	0.000241399	Stac	Down	src homology three (SH3) and cysteine rich domain [Source:MGI Symbol;Acc:MGI:1201400]
																ENSMUSG00000034145	1.764	2.878	7.196	0.804	0.575	0.825	3.946	0.734667	-2.42523	4.15e-08	1.68e-06	Tmem63c	Down	transmembrane protein 63c [Source:MGI Symbol;Acc:MGI:2444386]
																ENSMUSG00000021301	1.656	2.212	5.347	0.819	0.467	0.449	3.07167	0.578333	-2.40905	7.09e-09	3.67e-07	Hecw1	Down	HECT, C2 and WW domain containing E3 ubiquitin protein ligase 1 [Source:MGI Symbol;Acc:MGI:2444115]
																ENSMUSG00000026452	20.947	27.143	23.39	7.522	2.844	3.112	23.8267	4.49267	-2.40693	6.07e-17	2.68e-14	Syt2	Down	synaptotagmin II [Source:MGI Symbol;Acc:MGI:99666]
																ENSMUSG00000079092	0.788	2.641	3.353	0.389	0.625	0.266	2.26067	0.426667	-2.40557	0.00902863	0.0434587	Prl2c2	Down	prolactin family 2, subfamily c, member 2 [Source:MGI Symbol;Acc:MGI:97618]
																ENSMUSG00000023064	75.44	142.261	398.852	42.383	33.21	40.827	205.518	38.8067	-2.40489	0.000529357	0.00464538	Sncg	Down	synuclein, gamma [Source:MGI Symbol;Acc:MGI:1298397]
																ENSMUSG00000018126	0.316	1.26	1.902	0.208	0.2	0.266	1.15933	0.224667	-2.36744	0.00452096	0.025618	Baiap2l2	Down	BAI1-associated protein 2-like 2 [Source:MGI Symbol;Acc:MGI:2652819]
																ENSMUSG00000032564	0.616	1.675	3.77	0.428	0.277	0.47	2.02033	0.391667	-2.3669	4.28e-06	9.11e-05	Cpne4	Down	copine IV [Source:MGI Symbol;Acc:MGI:1921270]
																ENSMUSG00000041730	1.021	2.116	7.777	0.871	0.572	0.712	3.638	0.718333	-2.34042	5.55e-05	0.000760966	Drgx	Down	dorsal root ganglia homeobox [Source:MGI Symbol;Acc:MGI:2148204]
																ENSMUSG00000022176	0.411	1.336	3.428	0.353	0.56	0.119	1.725	0.344	-2.32612	0.006877	0.0354121	Rem2	Down	rad and gem related GTP binding protein 2 [Source:MGI Symbol;Acc:MGI:2155260]
																ENSMUSG00000058441	5.18	6.305	7.424	1.576	1.136	1.154	6.303	1.28867	-2.29016	4.91e-13	8.41e-11	Panx2	Down	pannexin 2 [Source:MGI Symbol;Acc:MGI:1890615]
																ENSMUSG00000056656	0.592	1.185	0.778	0.162	0.156	0.207	0.851667	0.175	-2.28293	0.00475282	0.0266241	Apol8	Down	apolipoprotein L 8 [Source:MGI Symbol;Acc:MGI:2444921]
																ENSMUSG00000029420	3.127	3.843	7.547	0.939	0.869	1.176	4.839	0.994667	-2.28242	1.57e-07	5.43e-06	Rimbp2	Down	RIMS binding protein 2 [Source:MGI Symbol;Acc:MGI:2443235]
																ENSMUSG00000021647	8.672	4.94	19.08	2.6	2.059	2.061	10.8973	2.24	-2.2824	1.34e-07	4.73e-06	Cartpt	Down	CART prepropeptide [Source:MGI Symbol;Acc:MGI:1351330]
																ENSMUSG00000117286	0.165	0.845	0.752	0.04	0.232	0.093	0.587333	0.121667	-2.27125	0.000995347	0.0077011	Gm1043	Down	predicted gene 1043 [Source:MGI Symbol;Acc:MGI:2685889]
																ENSMUSG00000027971	1.418	0.709	4.454	0.606	0.326	0.455	2.19367	0.462333	-2.24634	0.000807759	0.00650095	Ndst4	Down	N-deacetylase/N-sulfotransferase (heparin glucosaminyl) 4 [Source:MGI Symbol;Acc:MGI:1932545]
																ENSMUSG00000054134	0.259	0.175	0.391	0.023	0.022	0.13	0.275	0.0583333	-2.23704	0.00764273	0.0382985	Umodl1	Down	uromodulin-like 1 [Source:MGI Symbol;Acc:MGI:1929785]
																ENSMUSG00000079598	8.117	12.52	14.546	3.202	2.573	1.876	11.7277	2.55033	-2.20116	1.91e-11	2.04e-09	Clec2l	Down	C-type lectin domain family 2, member L [Source:MGI Symbol;Acc:MGI:2141402]
																ENSMUSG00000074715	0.325	1.704	1.035	0.321	0.197	0.15	1.02133	0.222667	-2.1975	0.00165453	0.0116449	Ccl28	Down	C-C motif chemokine ligand 28 [Source:MGI Symbol;Acc:MGI:1861731]
																ENSMUSG00000007030	1.422	2.472	2.877	0.337	0.484	0.671	2.257	0.497333	-2.18212	8.9e-08	3.25e-06	Vwa7	Down	von Willebrand factor A domain containing 7 [Source:MGI Symbol;Acc:MGI:1306798]
																ENSMUSG00000102206	0.348	1.015	0.972	0.149	0.066	0.3	0.778333	0.171667	-2.18078	0.00617598	0.0325501	Pcdha11	Down	protocadherin alpha 11 [Source:MGI Symbol;Acc:MGI:1298372]
																ENSMUSG00000068154	0.535	0.698	1.64	0.352	0.068	0.216	0.957667	0.212	-2.17546	0.00365058	0.021786	Insm1	Down	insulinoma-associated 1 [Source:MGI Symbol;Acc:MGI:1859980]
																ENSMUSG00000039860	2.812	4.245	4.154	0.888	0.696	0.904	3.737	0.829333	-2.17186	0.000130517	0.00150231	Srrm3	Down	serine/arginine repetitive matrix 3 [Source:MGI Symbol;Acc:MGI:1920309]
																ENSMUSG00000090061	0.324	0.644	1.546	0.268	0.15	0.158	0.838	0.192	-2.12584	0.0011553	0.00868046	Nwd2	Down	NACHT and WD repeat domain containing 2 [Source:MGI Symbol;Acc:MGI:1920464]
																ENSMUSG00000074968	1.369	3.031	8.266	0.944	1.302	0.667	4.222	0.971	-2.12038	0.00839538	0.0410785	Ano3	Down	anoctamin 3 [Source:MGI Symbol;Acc:MGI:3613666]
																ENSMUSG00000054966	2.54	0.929	2.557	0.448	0.387	0.554	2.00867	0.463	-2.11715	0.000448978	0.00408697	Lmntd1	Down	lamin tail domain containing 1 [Source:MGI Symbol;Acc:MGI:1921321]
																ENSMUSG00000025938	0.209	0.586	0.654	0.123	0.118	0.093	0.483	0.111333	-2.11714	0.000528279	0.00463817	Slco5a1	Down	solute carrier organic anion transporter family, member 5A1 [Source:MGI Symbol;Acc:MGI:2443431]
																ENSMUSG00000028546	2.345	7.477	12.79	2.231	1.627	1.431	7.53733	1.763	-2.09602	0.00468744	0.0263477	Elavl4	Down	ELAV like RNA binding protein 4 [Source:MGI Symbol;Acc:MGI:107427]
																ENSMUSG00000021255	0.612	0.716	0.49	0.218	0.025	0.187	0.606	0.143333	-2.07994	0.00429546	0.0245882	Esrrb	Down	estrogen related receptor, beta [Source:MGI Symbol;Acc:MGI:1346832]
																ENSMUSG00000110105	3.697	2.038	2.575	0.415	0.445	1.129	2.77	0.663	-2.06281	0.000675285	0.0056357	Gm45844	Down	predicted gene 45844 [Source:MGI Symbol;Acc:MGI:5804959]
																ENSMUSG00000018865	39.042	56.945	86.435	18.773	12.448	12.57	60.8073	14.597	-2.05857	3.37e-18	2.03e-15	Sult4a1	Down	sulfotransferase family 4A, member 1 [Source:MGI Symbol;Acc:MGI:1888971]
																ENSMUSG00000059991	0.872	1.565	6.156	0.559	0.498	1.014	2.86433	0.690333	-2.05283	0.00132047	0.00970208	Nptx2	Down	neuronal pentraxin 2 [Source:MGI Symbol;Acc:MGI:1858209]
																ENSMUSG00000046321	0.389	1.161	1.753	0.287	0.323	0.196	1.101	0.268667	-2.03493	0.00904742	0.0434912	Hs3st2	Down	heparan sulfate (glucosamine) 3-O-sulfotransferase 2 [Source:MGI Symbol;Acc:MGI:1333802]
																ENSMUSG00000007944	1.137	2.603	4.012	0.88	0.513	0.501	2.584	0.631333	-2.03313	0.000449752	0.00409195	Ttc9b	Down	tetratricopeptide repeat domain 9B [Source:MGI Symbol;Acc:MGI:1920282]
																ENSMUSG00000046999	0.687	1.819	3.521	0.465	0.449	0.564	2.009	0.492667	-2.02779	0.000889735	0.00704764	1110032F04Rik	Down	RIKEN cDNA 1110032F04 gene [Source:MGI Symbol;Acc:MGI:1915975]
																ENSMUSG00000029608	23.711	36.903	37.104	9.979	6.868	7.435	32.5727	8.094	-2.00874	3.64e-26	6.58e-23	Rph3a	Down	rabphilin 3A [Source:MGI Symbol;Acc:MGI:102788]
																ENSMUSG00000046480	8.86	14.795	13.725	3.766	2.808	2.784	12.46	3.11933	-1.99799	9.32e-21	9.35e-18	Scn4b	Down	sodium channel, type IV, beta [Source:MGI Symbol;Acc:MGI:2687406]
																ENSMUSG00000006711	0.534	1.523	2.604	0.505	0.37	0.301	1.55367	0.392	-1.98675	0.000220592	0.00229241	D130043K22Rik	Down	RIKEN cDNA D130043K22 gene [Source:MGI Symbol;Acc:MGI:3036268]
																ENSMUSG00000036815	1.547	3.895	8.502	1.279	1.138	1.109	4.648	1.17533	-1.98354	7.22e-06	0.000142197	Dpp10	Down	dipeptidylpeptidase 10 [Source:MGI Symbol;Acc:MGI:2442409]
																ENSMUSG00000074361	2.947	1.565	1.575	0.484	0.436	0.629	2.029	0.516333	-1.97439	2.07e-05	0.000343946	C5ar2	Down	complement component 5a receptor 2 [Source:MGI Symbol;Acc:MGI:2442013]
																ENSMUSG00000045009	1.556	2.129	2.448	0.528	0.345	0.69	2.04433	0.521	-1.97228	4.31e-06	9.15e-05	Prrt3	Down	proline-rich transmembrane protein 3 [Source:MGI Symbol;Acc:MGI:2444810]
																ENSMUSG00000022212	9.111	17.414	29.277	6.258	3.665	4.305	18.6007	4.74267	-1.97158	7.8e-10	5.4e-08	Cpne6	Down	copine VI [Source:MGI Symbol;Acc:MGI:1334445]
																ENSMUSG00000057715	1.231	1.34	2.966	0.605	0.628	0.182	1.84567	0.471667	-1.9683	0.000124165	0.0014486	A830018L16Rik	Down	RIKEN cDNA A830018L16 gene [Source:MGI Symbol;Acc:MGI:2444149]
																ENSMUSG00000026285	8.585	8.958	14.462	2.822	2.666	2.72	10.6683	2.736	-1.96319	8.61e-12	1e-09	Pdcd1	Down	programmed cell death 1 [Source:MGI Symbol;Acc:MGI:104879]
																ENSMUSG00000092083	0.335	0.815	1.428	0.233	0.163	0.271	0.859333	0.222333	-1.95049	2.65e-05	0.000424686	Kcnb2	Down	potassium voltage gated channel, Shab-related subfamily, member 2 [Source:MGI Symbol;Acc:MGI:99632]
																ENSMUSG00000027895	3.831	4.94	7.795	1.577	1.205	1.525	5.522	1.43567	-1.94347	3.08e-10	2.44e-08	Kcnc4	Down	potassium voltage gated channel, Shaw-related subfamily, member 4 [Source:MGI Symbol;Acc:MGI:96670]
																ENSMUSG00000044024	18.987	19.706	22.323	6.779	4.559	4.597	20.3387	5.31167	-1.93699	7.77e-19	5.2e-16	Rell2	Down	RELT-like 2 [Source:MGI Symbol;Acc:MGI:1918044]
																ENSMUSG00000025020	1.743	2.846	7.616	0.945	0.928	1.334	4.06833	1.069	-1.92818	3.74e-06	8.25e-05	Slit1	Down	slit guidance ligand 1 [Source:MGI Symbol;Acc:MGI:1315203]
																ENSMUSG00000066438	0.908	2.347	3.629	0.494	0.625	0.696	2.29467	0.605	-1.92328	0.000122619	0.00143705	Plekhd1	Down	pleckstrin homology domain containing, family D (with coiled-coil domains) member 1 [Source:MGI Symbol;Acc:MGI:3036228]
																ENSMUSG00000055214	0.886	1.511	3.991	0.663	0.256	0.771	2.12933	0.563333	-1.91834	0.00180847	0.0124755	Pld5	Down	phospholipase D family member 5 [Source:MGI Symbol;Acc:MGI:2442056]
																ENSMUSG00000008489	3.899	7.264	15.304	3.176	2.426	1.438	8.82233	2.34667	-1.91055	0.000984398	0.00762687	Elavl2	Down	ELAV like RNA binding protein 1 [Source:MGI Symbol;Acc:MGI:1100887]
																ENSMUSG00000024064	0.592	1.528	4.296	0.555	0.598	0.561	2.13867	0.571333	-1.90431	0.00240323	0.0157597	Galnt14	Down	polypeptide N-acetylgalactosaminyltransferase 14 [Source:MGI Symbol;Acc:MGI:1918935]
																ENSMUSG00000045259	2.1	1.484	1.512	0.566	0.312	0.488	1.69867	0.455333	-1.89941	0.00481161	0.02687	Klhdc9	Down	kelch domain containing 9 [Source:MGI Symbol;Acc:MGI:1916124]
																ENSMUSG00000060257	1.597	1.983	3.173	0.707	0.589	0.527	2.251	0.607667	-1.88921	1.16e-05	0.000211748	Scrt2	Down	scratch family zinc finger 2 [Source:MGI Symbol;Acc:MGI:2139287]
																ENSMUSG00000024524	5.426	10.706	21.069	3.572	3.163	3.346	12.4003	3.36033	-1.8837	0.000257838	0.00261018	Gnal	Down	guanine nucleotide binding protein, alpha stimulating, olfactory type [Source:MGI Symbol;Acc:MGI:95774]
																ENSMUSG00000069919	422.403	620.53	981.071	271.578	122.511	156.194	674.668	183.428	-1.87897	0.000210545	0.00221201	Hba-a1	Down	hemoglobin alpha, adult chain 1 [Source:MGI Symbol;Acc:MGI:96015]
																ENSMUSG00000007021	15.426	16.583	31.594	6.662	5.514	5.123	21.201	5.76633	-1.87841	5.68e-12	7.12e-10	Syngr3	Down	synaptogyrin 3 [Source:MGI Symbol;Acc:MGI:1341881]
																ENSMUSG00000021194	25.028	31.29	32.006	9.212	7.988	6.89	29.4413	8.03	-1.87437	5.76e-24	9.46e-21	Chga	Down	chromogranin A [Source:MGI Symbol;Acc:MGI:88394]
																ENSMUSG00000025576	4.203	8.451	12.688	2.438	2.238	2.24	8.44733	2.30533	-1.87352	1.01e-07	3.66e-06	Rbfox3	Down	RNA binding protein, fox-1 homolog (C. elegans) 3 [Source:MGI Symbol;Acc:MGI:106368]
																ENSMUSG00000062785	13.416	16.497	9.751	4.466	2.588	3.834	13.2213	3.62933	-1.86509	1.3e-14	3.39e-12	Kcnc3	Down	potassium voltage gated channel, Shaw-related subfamily, member 3 [Source:MGI Symbol;Acc:MGI:96669]
																ENSMUSG00000045613	1.189	2.457	1.45	0.557	0.519	0.335	1.69867	0.470333	-1.85265	6.68e-06	0.000132664	Chrm2	Down	cholinergic receptor, muscarinic 2, cardiac [Source:MGI Symbol;Acc:MGI:88397]
																ENSMUSG00000045318	0.867	0.628	1.546	0.253	0.366	0.227	1.01367	0.282	-1.84582	0.00303793	0.0189552	Adra2c	Down	adrenergic receptor, alpha 2c [Source:MGI Symbol;Acc:MGI:87936]
																ENSMUSG00000056812	2.343	3.111	4.716	0.895	1.015	0.922	3.39	0.944	-1.84443	1.41e-09	8.9e-08	St8sia3	Down	ST8 alpha-N-acetyl-neuraminide alpha-2,8-sialyltransferase 3 [Source:MGI Symbol;Acc:MGI:106019]
																ENSMUSG00000033615	121.191	145.019	158.668	50.884	30.85	36.686	141.626	39.4733	-1.84314	7.06e-28	1.42e-24	Cplx1	Down	complexin 1 [Source:MGI Symbol;Acc:MGI:104727]
																ENSMUSG00000023945	5.766	7.312	5.21	2.633	1.218	1.252	6.096	1.701	-1.84148	3.89e-10	2.95e-08	Slc5a7	Down	solute carrier family 5 (choline transporter), member 7 [Source:MGI Symbol;Acc:MGI:1927126]
																ENSMUSG00000090071	5.85	9.236	14.355	2.962	2.593	2.677	9.81367	2.744	-1.83851	1.13e-09	7.43e-08	Cdk5r2	Down	cyclin dependent kinase 5, regulatory subunit 2 [Source:MGI Symbol;Acc:MGI:1330828]
																ENSMUSG00000004113	2.475	2.047	6.6	1.181	0.863	1.094	3.70733	1.046	-1.8255	2.12e-06	5.04e-05	Cacna1b	Down	calcium channel, voltage-dependent, N type, alpha 1B subunit [Source:MGI Symbol;Acc:MGI:88296]
																ENSMUSG00000048899	5.373	8.511	9.748	2.876	1.874	1.938	7.87733	2.22933	-1.82109	6.5e-12	8.04e-10	Rimkla	Down	ribosomal modification protein rimK-like family member A [Source:MGI Symbol;Acc:MGI:3040686]
																ENSMUSG00000042388	3.923	4.704	5.912	1.292	1.625	1.209	4.84633	1.37533	-1.81711	1.62e-09	9.95e-08	Dlgap3	Down	DLG associated protein 3 [Source:MGI Symbol;Acc:MGI:3039563]
																ENSMUSG00000037653	1.354	2.355	3.591	0.867	0.736	0.469	2.43333	0.690667	-1.81687	0.00015374	0.00171816	Kctd8	Down	potassium channel tetramerisation domain containing 8 [Source:MGI Symbol;Acc:MGI:2443804]
																ENSMUSG00000051726	0.924	0.527	1.845	0.228	0.264	0.444	1.09867	0.312	-1.81614	0.00140522	0.010225	Kcnf1	Down	potassium voltage-gated channel, subfamily F, member 1 [Source:MGI Symbol;Acc:MGI:2687399]
																ENSMUSG00000050211	0.939	1.235	1.135	0.292	0.423	0.225	1.103	0.313333	-1.81566	0.00026856	0.00269156	Pla2g4e	Down	phospholipase A2, group IVE [Source:MGI Symbol;Acc:MGI:1919144]
																ENSMUSG00000058966	6.306	10.033	10.057	3.14	2.621	1.778	8.79867	2.513	-1.80787	3.29e-09	1.87e-07	Tlcd3b	Down	TLC domain containing 3B [Source:MGI Symbol;Acc:MGI:1916202]
																ENSMUSG00000096146	2.606	1.722	2.293	0.625	0.717	0.574	2.207	0.638667	-1.78895	1.78e-05	0.00030416	Kcnj11	Down	potassium inwardly rectifying channel, subfamily J, member 11 [Source:MGI Symbol;Acc:MGI:107501]
																ENSMUSG00000056596	11.036	17.739	37.754	7.387	6.55	5.342	22.1763	6.42633	-1.78695	3.31e-07	1.03e-05	Trnp1	Down	TMF1-regulated nuclear protein 1 [Source:MGI Symbol;Acc:MGI:1916789]
																ENSMUSG00000039114	11.48	21.887	52.624	9.232	9.226	6.632	28.6637	8.36333	-1.77707	0.00824181	0.0405247	Nrn1	Down	neuritin 1 [Source:MGI Symbol;Acc:MGI:1915654]
																ENSMUSG00000028963	26.32	19.668	28.793	10.747	5.67	5.405	24.927	7.274	-1.77689	4.74e-07	1.38e-05	Uts2	Down	urotensin 2 [Source:MGI Symbol;Acc:MGI:1346329]
																ENSMUSG00000091636	2.216	3.142	1.581	0.998	0.596	0.438	2.313	0.677333	-1.77183	0.00059432	0.00509175	Akain1	Down	A kinase anchor inhibitor 1 [Source:MGI Symbol;Acc:MGI:2444600]
																ENSMUSG00000034282	0.433	0.49	0.455	0.103	0.231	0.07	0.459333	0.134667	-1.77015	0.00738452	0.0373048	Evpl	Down	envoplakin [Source:MGI Symbol;Acc:MGI:107507]
																ENSMUSG00000021983	5.305	7.725	8.436	2.51	2.407	1.397	7.15533	2.10467	-1.76543	2.55e-10	2.07e-08	Atp8a2	Down	ATPase, aminophospholipid transporter-like, class I, type 8A, member 2 [Source:MGI Symbol;Acc:MGI:1354710]
																ENSMUSG00000010066	2.092	2.72	6.101	0.905	0.926	1.385	3.63767	1.072	-1.76271	4.25e-06	9.06e-05	Cacna2d2	Down	calcium channel, voltage-dependent, alpha 2/delta subunit 2 [Source:MGI Symbol;Acc:MGI:1929813]
																ENSMUSG00000047344	0.915	0.994	0.97	0.41	0.132	0.308	0.959667	0.283333	-1.76003	0.00181283	0.0124859	Lancl3	Down	LanC lantibiotic synthetase component C-like 3 (bacterial) [Source:MGI Symbol;Acc:MGI:2443335]
																ENSMUSG00000100241	6.556	8.322	4.915	3.255	1.003	1.622	6.59767	1.96	-1.7511	6.04e-06	0.000122398	Slc18a3	Down	solute carrier family 18 (vesicular monoamine), member 3 [Source:MGI Symbol;Acc:MGI:1101061]
																ENSMUSG00000052305	462.242	720.055	1067.54	324.922	129.942	214.354	749.947	223.073	-1.74927	0.000544529	0.00475772	Hbb-bs	Down	hemoglobin, beta adult s chain [Source:MGI Symbol;Acc:MGI:5474852]
																ENSMUSG00000039661	9.964	10.494	22.826	5.083	3.722	4.077	14.428	4.294	-1.74848	1.04e-07	3.74e-06	Dusp26	Down	dual specificity phosphatase 26 [Source:MGI Symbol;Acc:MGI:1914209]
																ENSMUSG00000024261	12.336	20.576	31.436	7.176	6	5.977	21.4493	6.38433	-1.74832	8.42e-12	9.88e-10	Syt4	Down	synaptotagmin IV [Source:MGI Symbol;Acc:MGI:101759]
																ENSMUSG00000045246	6.104	10.363	5.882	2.608	1.962	2.086	7.44967	2.21867	-1.74748	1.62e-10	1.38e-08	Kcng4	Down	potassium voltage-gated channel, subfamily G, member 4 [Source:MGI Symbol;Acc:MGI:1913983]
																ENSMUSG00000020436	6.192	8.31	10.816	4.107	2.212	1.282	8.43933	2.53367	-1.7359	2.68e-07	8.59e-06	Gabrg2	Down	gamma-aminobutyric acid type A receptor, subunit gamma 2 [Source:MGI Symbol;Acc:MGI:95623]
																ENSMUSG00000029359	2.039	4.115	6.48	1.376	1.122	1.302	4.21133	1.26667	-1.73324	0.00269468	0.0171882	Tesc	Down	tescalcin [Source:MGI Symbol;Acc:MGI:1930803]
																ENSMUSG00000032908	3.041	5.949	8.555	1.99	1.919	1.369	5.84833	1.75933	-1.733	4.4e-07	1.3e-05	Sgpp2	Down	sphingosine-1-phosphate phosphatase 2 [Source:MGI Symbol;Acc:MGI:3589109]
																ENSMUSG00000038541	2.412	1.124	2.036	0.408	0.786	0.488	1.85733	0.560667	-1.72802	0.00771316	0.0385452	Srd5a2	Down	steroid 5 alpha-reductase 2 [Source:MGI Symbol;Acc:MGI:2150380]
																ENSMUSG00000040136	1.092	1.252	1.448	0.396	0.429	0.32	1.264	0.381667	-1.72761	0.000225068	0.00233076	Abcc8	Down	ATP-binding cassette, sub-family C member 8 [Source:MGI Symbol;Acc:MGI:1352629]
																ENSMUSG00000041014	0.882	1.808	2.058	0.448	0.447	0.542	1.58267	0.479	-1.72426	0.000146007	0.00164702	Nrg3	Down	neuregulin 3 [Source:MGI Symbol;Acc:MGI:1097165]
																ENSMUSG00000030110	25.206	35.532	56.901	15.232	9.919	10.484	39.213	11.8783	-1.723	1.89e-05	0.000319877	Ret	Down	ret proto-oncogene [Source:MGI Symbol;Acc:MGI:97902]
																ENSMUSG00000022491	6.87	8.037	7.901	2.779	2.177	1.959	7.60267	2.305	-1.72174	0.000369128	0.00347089	Glycam1	Down	glycosylation dependent cell adhesion molecule 1 [Source:MGI Symbol;Acc:MGI:95759]
																ENSMUSG00000045174	1.184	1.506	1.929	0.571	0.455	0.382	1.53967	0.469333	-1.71393	6.34e-05	0.00084558	Amer3	Down	APC membrane recruitment 3 [Source:MGI Symbol;Acc:MGI:3026939]
																ENSMUSG00000024114	2.502	1.27	2.737	0.741	0.674	0.577	2.16967	0.664	-1.70822	0.00135584	0.00992157	Prss41	Down	serine protease 41 [Source:MGI Symbol;Acc:MGI:1918253]
																ENSMUSG00000060212	1.835	2.493	2.86	0.769	0.829	0.618	2.396	0.738667	-1.69763	4.37e-09	2.4e-07	Pcnx2	Down	pecanex homolog 2 [Source:MGI Symbol;Acc:MGI:2445010]
																ENSMUSG00000037492	1.111	1.208	3.067	0.626	0.478	0.562	1.79533	0.555333	-1.69283	0.000456833	0.00414593	Zmat4	Down	zinc finger, matrin type 4 [Source:MGI Symbol;Acc:MGI:2443497]
																ENSMUSG00000027581	90.47	110.507	169.278	43.215	35.371	36.134	123.418	38.24	-1.6904	2.93e-17	1.39e-14	Stmn3	Down	stathmin-like 3 [Source:MGI Symbol;Acc:MGI:1277137]
																ENSMUSG00000070866	0.407	0.885	0.969	0.26	0.296	0.145	0.753667	0.233667	-1.68947	0.00647779	0.033802	Zfp804a	Down	zinc finger protein 804A [Source:MGI Symbol;Acc:MGI:2442949]
																ENSMUSG00000041608	2.243	4.423	8.517	1.359	1.31	2.041	5.061	1.57	-1.68866	3.98e-05	0.000585623	Entpd3	Down	ectonucleoside triphosphate diphosphohydrolase 3 [Source:MGI Symbol;Acc:MGI:1321386]
																ENSMUSG00000031298	0.74	0.536	1.527	0.308	0.297	0.267	0.934333	0.290667	-1.68457	0.00282249	0.0178192	Adgrg2	Down	adhesion G protein-coupled receptor G2 [Source:MGI Symbol;Acc:MGI:2446854]
																ENSMUSG00000025723	6.469	12.526	31.929	5.479	5.28	5.096	16.9747	5.285	-1.68341	0.000550637	0.00479715	Nmb	Down	neuromedin B [Source:MGI Symbol;Acc:MGI:1915289]
																ENSMUSG00000037843	4.058	4.235	8.346	2.001	1.543	1.641	5.54633	1.72833	-1.68215	0.000123939	0.00144754	Vstm2l	Down	V-set and transmembrane domain containing 2-like [Source:MGI Symbol;Acc:MGI:2685537]
																ENSMUSG00000030731	8.735	9.171	7.445	3.122	1.603	3.196	8.45033	2.64033	-1.67829	9.43e-09	4.67e-07	Syt3	Down	synaptotagmin III [Source:MGI Symbol;Acc:MGI:99665]
																ENSMUSG00000070570	1.48	3.011	7.722	1.422	1.479	0.921	4.071	1.274	-1.67602	0.000995685	0.0077011	Slc17a7	Down	solute carrier family 17 (sodium-dependent inorganic phosphate cotransporter), member 7 [Source:MGI Symbol;Acc:MGI:1920211]
																ENSMUSG00000021700	3.032	4.182	5.05	1.37	1.461	1.007	4.088	1.27933	-1.676	1.07e-10	9.51e-09	Rab3c	Down	RAB3C, member RAS oncogene family [Source:MGI Symbol;Acc:MGI:1914545]
																ENSMUSG00000000308	35.148	42.481	45.575	15.823	12.181	11.047	41.068	13.017	-1.65762	1.81e-19	1.48e-16	Ckmt1	Down	creatine kinase, mitochondrial 1, ubiquitous [Source:MGI Symbol;Acc:MGI:99441]
																ENSMUSG00000062252	1.769	1.648	3.134	0.914	0.401	0.767	2.18367	0.694	-1.65375	0.0107847	0.0496868	Lhfpl5	Down	lipoma HMGIC fusion partner-like 5 [Source:MGI Symbol;Acc:MGI:1915382]
																ENSMUSG00000036564	93.983	118.698	206.544	56.945	40.843	35.612	139.742	44.4667	-1.65197	1.19e-05	0.00021545	Ndrg4	Down	N-myc downstream regulated gene 4 [Source:MGI Symbol;Acc:MGI:2384590]
																ENSMUSG00000037979	18.667	23.008	32.677	8.021	9.617	6.091	24.784	7.90967	-1.64772	4.35e-18	2.38e-15	Ccdc92	Down	coiled-coil domain containing 92 [Source:MGI Symbol;Acc:MGI:106485]
																ENSMUSG00000061911	1.377	3.665	4.055	1.131	0.847	0.93	3.03233	0.969333	-1.64536	0.00247398	0.0161242	Myt1l	Down	myelin transcription factor 1-like [Source:MGI Symbol;Acc:MGI:1100511]
																ENSMUSG00000040666	4.642	6.982	6.991	3.313	0.941	1.705	6.205	1.98633	-1.64332	0.000411844	0.00379679	Sh3bgr	Down	SH3-binding domain glutamic acid-rich protein [Source:MGI Symbol;Acc:MGI:1354740]
																ENSMUSG00000030337	66.623	98.043	73.481	31.006	20.814	24.425	79.3823	25.415	-1.64314	3.11e-21	3.74e-18	Vamp1	Down	vesicle-associated membrane protein 1 [Source:MGI Symbol;Acc:MGI:1313276]
																ENSMUSG00000073433	10.4	13.052	21.931	5.18	4.383	4.985	15.1277	4.84933	-1.64133	7.61e-07	2.08e-05	Arhgdig	Down	Rho GDP dissociation inhibitor gamma [Source:MGI Symbol;Acc:MGI:108430]
																ENSMUSG00000010803	3.553	3.551	6.658	1.918	1.061	1.457	4.58733	1.47867	-1.63336	1.5e-06	3.71e-05	Gabra1	Down	gamma-aminobutyric acid type A receptor subunit alpha 1 [Source:MGI Symbol;Acc:MGI:95613]
																ENSMUSG00000029223	176.046	198.092	413.542	97.787	80.7	75.832	262.56	84.773	-1.63097	8.94e-05	0.00112449	Uchl1	Down	ubiquitin carboxy-terminal hydrolase L1 [Source:MGI Symbol;Acc:MGI:103149]
																ENSMUSG00000007594	8.855	9.79	7.763	3.678	2.509	2.391	8.80267	2.85933	-1.62226	6.62e-12	8.13e-10	Hapln4	Down	hyaluronan and proteoglycan link protein 4 [Source:MGI Symbol;Acc:MGI:2679531]
																ENSMUSG00000032297	1.472	1.958	4.609	0.62	1.188	0.805	2.67967	0.871	-1.62131	0.00114316	0.00862746	Celf6	Down	CUGBP, Elav-like family member 6 [Source:MGI Symbol;Acc:MGI:1923433]
																ENSMUSG00000071658	26.333	29.125	54.229	11.963	10.345	13.462	36.5623	11.9233	-1.61657	9.85e-11	8.85e-09	Gng3	Down	guanine nucleotide binding protein (G protein), gamma 3 [Source:MGI Symbol;Acc:MGI:102704]
																ENSMUSG00000064225	1.402	2.055	3.327	0.795	0.691	0.735	2.26133	0.740333	-1.61093	7.37e-07	2.02e-05	Paqr9	Down	progestin and adipoQ receptor family member IX [Source:MGI Symbol;Acc:MGI:1922802]
																ENSMUSG00000067916	7.41	10.776	10.221	3.536	4.176	1.597	9.469	3.103	-1.60955	5.39e-07	1.54e-05	Zfp991	Down	zinc finger protein 991 [Source:MGI Symbol;Acc:MGI:3701604]
																ENSMUSG00000068129	144.4	72.439	147.04	53.884	30.724	34.711	121.293	39.773	-1.60864	0.00025657	0.00259879	Cst7	Down	cystatin F (leukocystatin) [Source:MGI Symbol;Acc:MGI:1298217]
																ENSMUSG00000019894	5.92	7.005	9.288	3.561	1.824	1.913	7.40433	2.43267	-1.60583	4.79e-09	2.6e-07	Slc6a15	Down	solute carrier family 6 (neurotransmitter transporter), member 15 [Source:MGI Symbol;Acc:MGI:2143484]
																ENSMUSG00000024647	2.191	2.486	4.095	1.188	0.578	1.123	2.924	0.963	-1.60234	0.000509977	0.00451701	Cbln2	Down	cerebellin 2 precursor protein [Source:MGI Symbol;Acc:MGI:88282]
																ENSMUSG00000022619	15.207	17.481	21.121	7.42	4.693	5.615	17.9363	5.90933	-1.60182	3.92e-18	2.28e-15	Mapk8ip2	Down	mitogen-activated protein kinase 8 interacting protein 2 [Source:MGI Symbol;Acc:MGI:1926555]
																ENSMUSG00000024517	3.118	3.599	3.247	1.576	0.784	0.923	3.32133	1.09433	-1.60171	0.00663361	0.0344064	Grp	Down	gastrin releasing peptide [Source:MGI Symbol;Acc:MGI:95833]
																ENSMUSG00000048483	2.237	2.987	3.343	0.977	0.911	0.937	2.85567	0.941667	-1.60054	6.21e-06	0.000125331	Zdhhc22	Down	zinc finger, DHHC-type containing 22 [Source:MGI Symbol;Acc:MGI:2685108]
																ENSMUSG00000039809	3.694	5.667	10.652	2.561	1.939	2.101	6.671	2.20033	-1.60018	3.48e-07	1.07e-05	Gabbr2	Down	gamma-aminobutyric acid type B receptor subunit 2 [Source:MGI Symbol;Acc:MGI:2386030]
																ENSMUSG00000021313	2.357	3.015	3.255	1.045	0.691	1.121	2.87567	0.952333	-1.59436	6.95e-09	3.61e-07	Ryr2	Down	ryanodine receptor 2, cardiac [Source:MGI Symbol;Acc:MGI:99685]
																ENSMUSG00000051504	5.749	4.974	9.885	2.665	1.755	2.445	6.86933	2.28833	-1.58587	9.02e-05	0.00113106	Siglech	Down	sialic acid binding Ig-like lectin H [Source:MGI Symbol;Acc:MGI:2443256]
																ENSMUSG00000024747	2.701	0.698	2.579	0.743	0.713	0.541	1.99267	0.665667	-1.58183	0.00998357	0.0467834	Aldh1a7	Down	aldehyde dehydrogenase family 1, subfamily A7 [Source:MGI Symbol;Acc:MGI:1347050]
																ENSMUSG00000053693	5.313	7.133	11.427	3.247	2.504	2.227	7.95767	2.65933	-1.58128	8.15e-09	4.14e-07	Mast1	Down	microtubule associated serine/threonine kinase 1 [Source:MGI Symbol;Acc:MGI:1861901]
																ENSMUSG00000010505	1.747	3.126	4.858	1.031	0.76	1.462	3.24367	1.08433	-1.58082	8.62622e-06	0.000165558	Myt1	Down	myelin transcription factor 1 [Source:MGI Symbol;Acc:MGI:1100535]
																ENSMUSG00000039838	5.952	5.781	6.836	2.307	1.615	2.299	6.18967	2.07367	-1.57768	3.03e-10	2.41e-08	Slc45a1	Down	solute carrier family 45, member 1 [Source:MGI Symbol;Acc:MGI:2653235]
																ENSMUSG00000055567	4.064	4.964	4.974	1.915	1.389	1.401	4.66733	1.56833	-1.57337	3.18e-12	4.42e-10	Unc80	Down	unc-80, NALCN activator [Source:MGI Symbol;Acc:MGI:2652882]
																ENSMUSG00000031139	1.086	1.411	1.378	0.507	0.374	0.427	1.29167	0.436	-1.56683	0.00102981	0.00791417	Mcf2	Down	mcf.2 transforming sequence [Source:MGI Symbol;Acc:MGI:96932]
																ENSMUSG00000029814	0.487	1.113	0.975	0.402	0.229	0.24	0.858333	0.290333	-1.56383	0.00689836	0.0354638	Igf2bp3	Down	insulin-like growth factor 2 mRNA binding protein 3 [Source:MGI Symbol;Acc:MGI:1890359]
																ENSMUSG00000032259	1.433	1.747	1.188	0.257	0.826	0.395	1.456	0.492667	-1.56333	0.009058	0.0434978	Drd2	Down	dopamine receptor D2 [Source:MGI Symbol;Acc:MGI:94924]
																ENSMUSG00000054013	8.739	8.993	11.592	3.163	3.403	3.376	9.77467	3.314	-1.56047	2.22e-11	2.3e-09	Tmem179	Down	transmembrane protein 179 [Source:MGI Symbol;Acc:MGI:2144891]
																ENSMUSG00000025318	9.095	9.72	12.701	3.839	3.586	3.291	10.5053	3.572	-1.55632	7.4e-14	1.67e-11	Jph3	Down	junctophilin 3 [Source:MGI Symbol;Acc:MGI:1891497]
																ENSMUSG00000058740	4.036	5.096	8.762	2.095	1.88	2.11	5.96467	2.02833	-1.55615	1.32e-07	4.67e-06	Kcnt1	Down	potassium channel, subfamily T, member 1 [Source:MGI Symbol;Acc:MGI:1924627]
																ENSMUSG00000016346	4.809	6.568	7.76	2.229	2.162	2.121	6.379	2.17067	-1.55519	2.34e-13	4.41e-11	Kcnq2	Down	potassium voltage-gated channel, subfamily Q, member 2 [Source:MGI Symbol;Acc:MGI:1309503]
																ENSMUSG00000036913	1.228	1.72	2.954	0.912	0.482	0.615	1.96733	0.669667	-1.55473	1.96e-05	0.000328346	Trim67	Down	tripartite motif-containing 67 [Source:MGI Symbol;Acc:MGI:3045323]
																ENSMUSG00000062184	2.149	2.855	4.714	1.061	1.239	1.032	3.23933	1.11067	-1.54427	9.49e-06	0.000179056	Hs6st2	Down	heparan sulfate 6-O-sulfotransferase 2 [Source:MGI Symbol;Acc:MGI:1354959]
																ENSMUSG00000030500	6.498	9.243	15.65	4.061	3.407	3.325	10.4637	3.59767	-1.54026	2.82e-08	1.2e-06	Slc17a6	Down	solute carrier family 17 (sodium-dependent inorganic phosphate cotransporter), member 6 [Source:MGI Symbol;Acc:MGI:2156052]
																ENSMUSG00000033707	3.27	3.433	4.217	1.2	1.49	1.073	3.64	1.25433	-1.53702	0.000167009	0.00184815	Lrrc24	Down	leucine rich repeat containing 24 [Source:MGI Symbol;Acc:MGI:3605040]
																ENSMUSG00000045034	2.218	2.399	2.111	0.843	0.865	0.613	2.24267	0.773667	-1.53543	3.58e-05	0.000541254	Ankrd34b	Down	ankyrin repeat domain 34B [Source:MGI Symbol;Acc:MGI:2443245]
																ENSMUSG00000048385	5.658	7.714	6.493	3.064	1.825	1.966	6.62167	2.285	-1.535	9.06e-10	6.13e-08	Scrt1	Down	scratch family zinc finger 1 [Source:MGI Symbol;Acc:MGI:2176606]
																ENSMUSG00000042761	3.52	3.572	4.009	1.161	0.98	1.7	3.70033	1.28033	-1.53114	0.000169986	0.00187306	Mrap2	Down	melanocortin 2 receptor accessory protein 2 [Source:MGI Symbol;Acc:MGI:3609239]
																ENSMUSG00000016349	93.853	111.244	152.145	42.874	41.641	39.715	119.081	41.41	-1.52389	3.5e-21	3.95e-18	Eef1a2	Down	eukaryotic translation elongation factor 1 alpha 2 [Source:MGI Symbol;Acc:MGI:1096317]
																ENSMUSG00000032769	1.323	2.793	5.193	1.228	0.962	1.049	3.103	1.07967	-1.52308	0.000469528	0.00422085	Trpa1	Down	transient receptor potential cation channel, subfamily A, member 1 [Source:MGI Symbol;Acc:MGI:3522699]
																ENSMUSG00000010086	8.867	10.382	16.12	5.098	3.621	3.589	11.7897	4.10267	-1.52289	3.06e-09	1.76e-07	Rnf112	Down	ring finger protein 112 [Source:MGI Symbol;Acc:MGI:106611]
																ENSMUSG00000029088	4.417	6.699	17.008	3.68	3.974	2.136	9.37467	3.26333	-1.52242	0.000342444	0.00328081	Kcnip4	Down	Kv channel interacting protein 4 [Source:MGI Symbol;Acc:MGI:1933131]
																ENSMUSG00000040276	18.054	21.224	29.702	8.89	7.471	7.718	22.9933	8.02633	-1.5184	1.02e-16	4.19e-14	Pacsin1	Down	protein kinase C and casein kinase substrate in neurons 1 [Source:MGI Symbol;Acc:MGI:1345181]
																ENSMUSG00000027500	72.418	98.319	163.694	50.943	33.844	32.157	111.477	38.9813	-1.51589	0.000365606	0.00344924	Stmn2	Down	stathmin-like 2 [Source:MGI Symbol;Acc:MGI:98241]
																ENSMUSG00000050822	3.729	7.903	7.377	2.23	1.923	2.515	6.33633	2.22267	-1.51136	2.36e-06	5.53e-05	Slc29a4	Down	solute carrier family 29 (nucleoside transporters), member 4 [Source:MGI Symbol;Acc:MGI:2385330]
																ENSMUSG00000024743	9.377	8.042	13.502	3.824	3.861	3.207	10.307	3.63067	-1.50532	2.99e-11	3e-09	Syt7	Down	synaptotagmin VII [Source:MGI Symbol;Acc:MGI:1859545]
																ENSMUSG00000027716	1.228	2.018	4.718	0.738	0.797	1.272	2.65467	0.935667	-1.50446	0.00185654	0.0127487	Trpc3	Down	transient receptor potential cation channel, subfamily C, member 3 [Source:MGI Symbol;Acc:MGI:109526]
																ENSMUSG00000026564	4.444	2.738	5.325	1.303	1.462	1.665	4.169	1.47667	-1.49736	2.11e-06	5.03e-05	Styxl2	Down	serine/threonine/tyrosine interacting like 2 [Source:MGI Symbol;Acc:MGI:2685055]
																ENSMUSG00000047155	1.004	1.457	1.85	0.621	0.402	0.508	1.437	0.510333	-1.49355	0.000193531	0.0020657	Cyp4x1	Down	cytochrome P450, family 4, subfamily x, polypeptide 1 [Source:MGI Symbol;Acc:MGI:1932403]
																ENSMUSG00000040265	20.579	22.707	28.825	9.748	7.564	8.299	24.037	8.537	-1.49346	3.25e-18	2.02e-15	Dnm3	Down	dynamin 3 [Source:MGI Symbol;Acc:MGI:1341299]
																ENSMUSG00000094622	1.738	1.462	1.282	0.524	0.838	0.231	1.494	0.531	-1.4924	6.1e-06	0.000123598	Gm3055	Down	predicted gene 3055 [Source:MGI Symbol;Acc:MGI:3809197]
																ENSMUSG00000096847	3.592	3.484	5.477	1.54	1.409	1.517	4.18433	1.48867	-1.49098	4.21e-08	1.7e-06	Tmem151b	Down	transmembrane protein 151B [Source:MGI Symbol;Acc:MGI:2685169]
																ENSMUSG00000042078	4.959	7.353	8.752	2.961	2.05	2.517	7.02133	2.50933	-1.48444	1.34e-08	6.33e-07	Svop	Down	SV2 related protein [Source:MGI Symbol;Acc:MGI:1915916]
																ENSMUSG00000054850	3.698	3.568	5.462	1.413	1.407	1.729	4.24267	1.51633	-1.48438	2.09e-05	0.000347078	Smim10l2a	Down	small integral membrane protein 10 like 2A [Source:MGI Symbol;Acc:MGI:2443645]
																ENSMUSG00000029712	2.623	6.123	5.321	2.535	1.659	0.843	4.689	1.679	-1.48168	0.00967326	0.045673	Actl6b	Down	actin-like 6B [Source:MGI Symbol;Acc:MGI:1933548]
																ENSMUSG00000048304	2.113	2.589	3.705	0.916	0.803	1.304	2.80233	1.00767	-1.47561	3.93e-05	0.000580229	Slitrk3	Down	SLIT and NTRK-like family, member 3 [Source:MGI Symbol;Acc:MGI:2679447]
																ENSMUSG00000022055	118.761	152.193	105.29	63.149	33.485	38.671	125.415	45.1017	-1.47545	2.76e-07	8.81e-06	Nefl	Down	neurofilament, light polypeptide [Source:MGI Symbol;Acc:MGI:97313]
																ENSMUSG00000037463	3.495	4.951	2.988	1.282	1.176	1.654	3.81133	1.37067	-1.47542	0.00883436	0.0427117	Fbxo27	Down	F-box protein 27 [Source:MGI Symbol;Acc:MGI:2685007]
																ENSMUSG00000045179	1.661	1.456	2.872	0.898	0.662	0.596	1.99633	0.718667	-1.47396	0.00652425	0.0339758	Sox3	Down	SRY (sex determining region Y)-box 3 [Source:MGI Symbol;Acc:MGI:98365]
																ENSMUSG00000034336	10.521	14.232	11.109	5.485	4.012	3.418	11.954	4.305	-1.47341	1.48e-10	1.28e-08	Ina	Down	internexin neuronal intermediate filament protein, alpha [Source:MGI Symbol;Acc:MGI:96568]
																ENSMUSG00000054976	0.522	0.815	1.368	0.41	0.307	0.258	0.901667	0.325	-1.47215	0.00960776	0.0454588	Nyap2	Down	neuronal tyrosine-phophorylated phosphoinositide 3-kinase adaptor 2 [Source:MGI Symbol;Acc:MGI:2443135]
																ENSMUSG00000013766	3.606	3.62	2.826	1.171	1.379	1.077	3.35067	1.209	-1.47063	0.00706114	0.0360645	Ly6g6e	Down	lymphocyte antigen 6 family member G6E [Source:MGI Symbol;Acc:MGI:1917524]
																ENSMUSG00000014301	7.911	15.987	5.868	3.551	3.277	3.937	9.922	3.58833	-1.46732	0.00305443	0.0190349	Pam16	Down	presequence translocase-asssociated motor 16 [Source:MGI Symbol;Acc:MGI:1913699]
																ENSMUSG00000045007	4.788	6.589	8.183	2.679	2.481	1.93	6.52	2.36333	-1.46405	1.7e-05	0.000291673	Tubg2	Down	tubulin, gamma 2 [Source:MGI Symbol;Acc:MGI:2144208]
																ENSMUSG00000064329	3.594	5.384	5.439	2.163	1.516	1.564	4.80567	1.74767	-1.45931	1.08e-11	1.21e-09	Scn1a	Down	sodium channel, voltage-gated, type I, alpha [Source:MGI Symbol;Acc:MGI:98246]
																ENSMUSG00000060240	50.74	59.511	76.497	24.087	21.159	22.79	62.2493	22.6787	-1.45672	5.5e-19	3.97e-16	Cend1	Down	cell cycle exit and neuronal differentiation 1 [Source:MGI Symbol;Acc:MGI:1929898]
																ENSMUSG00000026959	13.084	13.011	15.144	5.986	4.629	4.419	13.7463	5.01133	-1.45578	1.05e-14	2.83e-12	Grin1	Down	glutamate receptor, ionotropic, NMDA1 (zeta 1) [Source:MGI Symbol;Acc:MGI:95819]
																ENSMUSG00000036745	25.499	34.004	51.745	17.097	13.052	10.431	37.0827	13.5267	-1.45494	3.72e-12	4.97e-10	Ttll7	Down	tubulin tyrosine ligase-like family, member 7 [Source:MGI Symbol;Acc:MGI:1918142]
																ENSMUSG00000032940	2.459	2.579	5.108	1.293	1.244	1.166	3.382	1.23433	-1.45414	0.000591077	0.00507549	Rbm11	Down	RNA binding motif protein 11 [Source:MGI Symbol;Acc:MGI:2447622]
																ENSMUSG00000046699	0.816	1.945	1.396	0.701	0.556	0.263	1.38567	0.506667	-1.45147	0.000570055	0.00492593	Slitrk4	Down	SLIT and NTRK-like family, member 4 [Source:MGI Symbol;Acc:MGI:2442509]
																ENSMUSG00000026418	3.698	3.772	3.508	1.392	1.428	1.2	3.65933	1.34	-1.44935	0.010404	0.0482901	Tnni1	Down	troponin I, skeletal, slow 1 [Source:MGI Symbol;Acc:MGI:105073]
																ENSMUSG00000023328	19.563	18.368	22.625	8.334	6.544	7.322	20.1853	7.4	-1.44771	2.63e-14	6.59e-12	Ache	Down	acetylcholinesterase [Source:MGI Symbol;Acc:MGI:87876]
																ENSMUSG00000030124	53.96	37.978	45.239	19.845	13.983	16.601	45.7257	16.8097	-1.44371	1.07e-13	2.33e-11	Lag3	Down	lymphocyte-activation gene 3 [Source:MGI Symbol;Acc:MGI:106588]
																ENSMUSG00000093536	1.972	2.633	1.931	0.99	0.749	0.665	2.17867	0.801333	-1.44297	0.00020229	0.00214022	Smim17	Down	small integral membrane protein 17 [Source:MGI Symbol;Acc:MGI:4365374]
																ENSMUSG00000041020	13.022	22.561	35.584	11.816	7.06	7.307	23.7223	8.72767	-1.44258	1.33e-08	6.32e-07	Map7d2	Down	MAP7 domain containing 2 [Source:MGI Symbol;Acc:MGI:1917474]
																ENSMUSG00000028977	0.588	0.994	3.835	0.387	0.622	0.985	1.80567	0.664667	-1.44183	0.00905844	0.0434978	Casz1	Down	castor zinc finger 1 [Source:MGI Symbol;Acc:MGI:1196251]
																ENSMUSG00000090223	22.264	32.078	69.855	14.291	16.246	15.181	41.399	15.2393	-1.4418	4.57e-05	0.000650921	Pcp4	Down	Purkinje cell protein 4 [Source:MGI Symbol;Acc:MGI:97509]
																ENSMUSG00000050357	2.433	3.483	3.867	1.457	1.033	1.12	3.261	1.20333	-1.43828	4e-06	8.69e-05	Carmil2	Down	capping protein regulator and myosin 1 linker 2 [Source:MGI Symbol;Acc:MGI:2685431]
																ENSMUSG00000003657	22.574	29.158	24.694	10.749	7.718	9.77	25.4753	9.41233	-1.43648	2.83e-12	3.97e-10	Calb2	Down	calbindin 2 [Source:MGI Symbol;Acc:MGI:101914]
																ENSMUSG00000074899	1.095	1.377	1.014	0.414	0.386	0.488	1.162	0.429333	-1.43644	1.52e-06	3.77e-05	Sptbn5	Down	spectrin beta, non-erythrocytic 5 [Source:MGI Symbol;Acc:MGI:2685200]
																ENSMUSG00000031772	1.369	1.191	2.896	0.743	0.651	0.623	1.81867	0.672333	-1.43563	0.000805021	0.0064818	Cntnap4	Down	contactin associated protein-like 4 [Source:MGI Symbol;Acc:MGI:2183572]
																ENSMUSG00000040797	5.641	5.72	7.105	2.436	2.214	2.192	6.15533	2.28067	-1.43238	3.74e-14	8.77e-12	Iqsec3	Down	IQ motif and Sec7 domain 3 [Source:MGI Symbol;Acc:MGI:2677208]
																ENSMUSG00000023011	38.901	43.399	42.528	17.075	14.395	14.8	41.6093	15.4233	-1.43179	2.43e-30	6.26e-27	Faim2	Down	Fas apoptotic inhibitory molecule 2 [Source:MGI Symbol;Acc:MGI:1919643]
																ENSMUSG00000034891	33.507	27.057	35.114	13.566	10.454	11.673	31.8927	11.8977	-1.42255	6.17e-12	7.68e-10	Sncb	Down	synuclein, beta [Source:MGI Symbol;Acc:MGI:1889011]
																ENSMUSG00000052373	1.981	1.562	2.592	0.804	0.739	0.746	2.045	0.763	-1.42235	0.00125389	0.00926946	Mpp3	Down	membrane protein, palmitoylated 3 (MAGUK p55 subfamily member 3) [Source:MGI Symbol;Acc:MGI:1328354]
																ENSMUSG00000043388	22.717	20.619	28.734	8.907	9.375	8.613	24.0233	8.965	-1.42206	1.71e-15	5.42e-13	Tmem130	Down	transmembrane protein 130 [Source:MGI Symbol;Acc:MGI:3607706]
																ENSMUSG00000019146	2.209	2.641	1.757	0.97	0.687	0.812	2.20233	0.823	-1.42007	1.22e-05	0.000221188	Cacng2	Down	calcium channel, voltage-dependent, gamma subunit 2 [Source:MGI Symbol;Acc:MGI:1316660]
																ENSMUSG00000047658	1.736	1.54	1.5	0.721	0.652	0.416	1.592	0.596333	-1.41665	0.00744874	0.0375451	Gal3st3	Down	galactose-3-O-sulfotransferase 3 [Source:MGI Symbol;Acc:MGI:3617843]
																ENSMUSG00000070695	0.445	0.516	0.785	0.249	0.173	0.235	0.582	0.219	-1.41009	0.00116386	0.00872532	Cntnap5a	Down	contactin associated protein-like 5A [Source:MGI Symbol;Acc:MGI:3643623]
																ENSMUSG00000011751	5.133	3.673	5.149	1.73	2.109	1.414	4.65167	1.751	-1.40957	2.37e-10	1.94e-08	Sptbn4	Down	spectrin beta, non-erythrocytic 4 [Source:MGI Symbol;Acc:MGI:1890574]
																ENSMUSG00000027612	4.017	3.692	5	1.727	1.432	1.646	4.23633	1.60167	-1.40324	9.51e-08	3.44e-06	Mmp24	Down	matrix metallopeptidase 24 [Source:MGI Symbol;Acc:MGI:1341867]
																ENSMUSG00000040424	2.015	2.616	3.487	1.268	1.236	0.573	2.706	1.02567	-1.3996	0.00123129	0.0091323	Hipk4	Down	homeodomain interacting protein kinase 4 [Source:MGI Symbol;Acc:MGI:2685008]
																ENSMUSG00000060371	2.132	6.014	1.998	2.121	0.665	1.071	3.38133	1.28567	-1.39508	1.06e-05	0.000196831	Caln1	Down	calneuron 1 [Source:MGI Symbol;Acc:MGI:2155987]
																ENSMUSG00000036760	2.635	4.272	2.312	1.694	0.915	0.9	3.073	1.16967	-1.39355	2.63e-06	6.07e-05	Kcnk9	Down	potassium channel, subfamily K, member 9 [Source:MGI Symbol;Acc:MGI:3521816]
																ENSMUSG00000062542	3.565	5.103	12.904	2.808	2.701	2.729	7.19067	2.746	-1.38879	9.86e-05	0.00121319	Syt9	Down	synaptotagmin IX [Source:MGI Symbol;Acc:MGI:1926373]
																ENSMUSG00000074141	5.626	6.613	11.874	3.703	2.062	3.454	8.03767	3.073	-1.38713	2.15e-05	0.000354976	Il4i1	Down	interleukin 4 induced 1 [Source:MGI Symbol;Acc:MGI:109552]
																ENSMUSG00000054409	1.223	1.568	2.127	0.928	0.447	0.507	1.63933	0.627333	-1.38581	0.00340614	0.0207051	Tmem74	Down	transmembrane protein 74 [Source:MGI Symbol;Acc:MGI:2443417]
																ENSMUSG00000035849	2.6	5.421	4.488	1.683	1.558	1.554	4.16967	1.59833	-1.38336	0.000110387	0.00132317	Krt222	Down	keratin 222 [Source:MGI Symbol;Acc:MGI:2442728]
																ENSMUSG00000031840	86.796	96.746	119.428	42.462	36.28	37.534	100.99	38.7587	-1.38162	1.72e-20	1.63e-17	Rab3a	Down	RAB3A, member RAS oncogene family [Source:MGI Symbol;Acc:MGI:97843]
																ENSMUSG00000067889	8.331	7.65	9.668	3.167	3.331	3.383	8.54967	3.29367	-1.37617	2.61e-17	1.27e-14	Sptbn2	Down	spectrin beta, non-erythrocytic 2 [Source:MGI Symbol;Acc:MGI:1313261]
																ENSMUSG00000029544	15.399	19.685	26.272	10.199	6.179	7.278	20.452	7.88533	-1.375	3.5e-07	1.08e-05	Cabp1	Down	calcium binding protein 1 [Source:MGI Symbol;Acc:MGI:1352750]
																ENSMUSG00000042401	18.095	14.061	16.223	6.967	6.755	4.933	16.1263	6.21833	-1.37482	3.27e-11	3.26e-09	Crtac1	Down	cartilage acidic protein 1 [Source:MGI Symbol;Acc:MGI:1920082]
																ENSMUSG00000020396	87.528	82.103	84.604	47.227	21.517	29.32	84.745	32.688	-1.37437	1.66e-06	4.1e-05	Nefh	Down	neurofilament, heavy polypeptide [Source:MGI Symbol;Acc:MGI:97309]
																ENSMUSG00000042750	37.764	40.215	59.638	20.055	15.748	17.341	45.8723	17.7147	-1.37268	5.67e-10	4.09e-08	Bex2	Down	brain expressed X-linked 2 [Source:MGI Symbol;Acc:MGI:1338017]
																ENSMUSG00000061576	17.258	21.486	32.771	8.724	10.295	8.646	23.8383	9.22167	-1.37018	1.73e-10	1.47e-08	Dpp6	Down	dipeptidylpeptidase 6 [Source:MGI Symbol;Acc:MGI:94921]
																ENSMUSG00000020135	17.498	10.966	13.831	4.65	4.633	7.079	14.0983	5.454	-1.37014	4.89e-16	1.8e-13	Apc2	Down	APC regulator of WNT signaling pathway 2 [Source:MGI Symbol;Acc:MGI:1346052]
																ENSMUSG00000032549	34.092	46.934	67.845	21.745	16.848	19.01	49.6237	19.201	-1.36985	7.13e-12	8.7e-10	Rab6b	Down	RAB6B, member RAS oncogene family [Source:MGI Symbol;Acc:MGI:107283]
																ENSMUSG00000021675	1.724	2.643	7.11	1.134	1.429	1.878	3.82567	1.48033	-1.36979	0.00617545	0.0325501	F2rl2	Down	coagulation factor II thrombin receptor like 2 [Source:MGI Symbol;Acc:MGI:1298208]
																ENSMUSG00000021730	1.385	1.548	2.062	0.818	0.64	0.475	1.665	0.644333	-1.36964	5.8e-07	1.64e-05	Hcn1	Down	hyperpolarization activated cyclic nucleotide gated potassium channel 1 [Source:MGI Symbol;Acc:MGI:1096392]
																ENSMUSG00000026610	2.118	3.935	2.52	1.422	0.735	1.162	2.85767	1.10633	-1.36905	0.000102692	0.00125058	Esrrg	Down	estrogen-related receptor gamma [Source:MGI Symbol;Acc:MGI:1347056]
																ENSMUSG00000045733	3.344	3.599	6.779	1.843	1.871	1.624	4.574	1.77933	-1.36212	5.04e-05	0.000705345	Sprn	Down	shadow of prion protein [Source:MGI Symbol;Acc:MGI:3582583]
																ENSMUSG00000021613	0.639	0.884	1.101	0.305	0.423	0.294	0.874667	0.340667	-1.36037	0.00480713	0.02687	Hapln1	Down	hyaluronan and proteoglycan link protein 1 [Source:MGI Symbol;Acc:MGI:1337006]
																ENSMUSG00000020734	1.167	1.744	1.925	0.588	0.565	0.732	1.612	0.628333	-1.35925	0.000639399	0.00541122	Grin2c	Down	glutamate receptor, ionotropic, NMDA2C (epsilon 3) [Source:MGI Symbol;Acc:MGI:95822]
																ENSMUSG00000032735	1.592	1.781	4.384	0.966	1.041	1.023	2.58567	1.01	-1.35618	0.0017338	0.0120796	Ablim3	Down	actin binding LIM protein family, member 3 [Source:MGI Symbol;Acc:MGI:2442582]
																ENSMUSG00000024109	12.509	13.594	13.067	5.24	5.082	4.987	13.0567	5.103	-1.35537	1.59e-13	3.26e-11	Nrxn1	Down	neurexin I [Source:MGI Symbol;Acc:MGI:1096391]
																ENSMUSG00000031376	3.527	3.093	3.505	1.797	1.089	1.082	3.375	1.32267	-1.35144	8.42e-06	0.000162603	Atp2b3	Down	ATPase, Ca++ transporting, plasma membrane 3 [Source:MGI Symbol;Acc:MGI:1347353]
																ENSMUSG00000022099	20.32	19.727	32.07	10.276	9.229	8.783	24.039	9.42933	-1.35015	4.21e-10	3.14e-08	Dmtn	Down	dematin actin binding protein [Source:MGI Symbol;Acc:MGI:99670]
																ENSMUSG00000044628	20.914	23.724	26.419	9.916	8.838	9.159	23.6857	9.30433	-1.34804	1.56e-11	1.7e-09	Rnf208	Down	ring finger protein 208 [Source:MGI Symbol;Acc:MGI:1916096]
																ENSMUSG00000025766	6.958	9.466	9.598	4.23	3.061	2.933	8.674	3.408	-1.34777	1.08e-15	3.48e-13	D3Ertd751e	Down	DNA segment, Chr 3, ERATO Doi 751, expressed [Source:MGI Symbol;Acc:MGI:1289213]
																ENSMUSG00000000805	3.435	6.031	7.034	3.648	1.675	1.164	5.5	2.16233	-1.34684	0.00696768	0.0357035	Car4	Down	carbonic anhydrase 4 [Source:MGI Symbol;Acc:MGI:1096574]
																ENSMUSG00000051111	12.703	16.423	20.079	8.067	5.397	5.899	16.4017	6.45433	-1.3455	7.86e-13	1.28e-10	Sv2c	Down	synaptic vesicle glycoprotein 2c [Source:MGI Symbol;Acc:MGI:1922459]
																ENSMUSG00000019775	2.142	3.094	3.472	1.346	1.053	1.035	2.90267	1.14467	-1.34245	3.08e-07	9.68e-06	Rgs17	Down	regulator of G-protein signaling 17 [Source:MGI Symbol;Acc:MGI:1927469]
																ENSMUSG00000035615	4.503	5.323	10.124	2.956	2.339	2.58	6.65	2.625	-1.34104	9.25e-06	0.000175459	Frmpd1	Down	FERM and PDZ domain containing 1 [Source:MGI Symbol;Acc:MGI:2446274]
																ENSMUSG00000022211	2.788	3.179	4.364	1.208	1.751	1.129	3.44367	1.36267	-1.33751	0.000486848	0.00434196	Carmil3	Down	capping protein regulator and myosin 1 linker 3 [Source:MGI Symbol;Acc:MGI:2448573]
																ENSMUSG00000107877	2.501	2.714	1.454	1.08	1.186	0.377	2.223	0.881	-1.33529	0.00499673	0.0276728	4933427D14Rik	Down	RIKEN cDNA 4933427D14 gene [Source:MGI Symbol;Acc:MGI:1921727]
																ENSMUSG00000062044	7.717	4.497	4.829	2.36	1.837	2.558	5.681	2.25167	-1.33515	2.91e-08	1.24e-06	Lmtk3	Down	lemur tyrosine kinase 3 [Source:MGI Symbol;Acc:MGI:3039582]
																ENSMUSG00000040640	2.301	4.11	5.879	1.809	1.478	1.585	4.09667	1.624	-1.3349	0.000757254	0.00617427	Erc2	Down	ELKS/RAB6-interacting/CAST family member 2 [Source:MGI Symbol;Acc:MGI:1098749]
																ENSMUSG00000081683	21.207	25.159	22.565	8.392	9.483	9.464	22.977	9.113	-1.33419	4.03e-18	2.28e-15	Fzd10	Down	frizzled class receptor 10 [Source:MGI Symbol;Acc:MGI:2136761]
																ENSMUSG00000030302	16.792	22.809	20.438	9.612	7.489	6.723	20.013	7.94133	-1.33348	3.81e-16	1.44e-13	Atp2b2	Down	ATPase, Ca++ transporting, plasma membrane 2 [Source:MGI Symbol;Acc:MGI:105368]
																ENSMUSG00000049122	3.063	6.505	9.282	2.21	2.289	2.986	6.28333	2.495	-1.33249	0.0011987	0.00893666	Frmd3	Down	FERM domain containing 3 [Source:MGI Symbol;Acc:MGI:2442466]
																ENSMUSG00000033597	5.199	6.822	9.823	3.258	2.668	2.767	7.28133	2.89767	-1.32931	1.57e-08	7.2e-07	Caskin1	Down	CASK interacting protein 1 [Source:MGI Symbol;Acc:MGI:2442952]
																ENSMUSG00000045967	3.579	6.087	7.712	2.586	2.054	2.277	5.79267	2.30567	-1.32904	2.05e-07	6.84e-06	Gpr158	Down	G protein-coupled receptor 158 [Source:MGI Symbol;Acc:MGI:2441697]
																ENSMUSG00000027350	52.972	79.695	100.216	33.923	31.172	27.717	77.6277	30.9373	-1.32722	5.18e-12	6.58e-10	Chgb	Down	chromogranin B [Source:MGI Symbol;Acc:MGI:88395]
																ENSMUSG00000025777	5.295	8.313	10.542	3.923	3.33	2.379	8.05	3.21067	-1.32612	2.48e-06	5.77e-05	Gdap1	Down	ganglioside-induced differentiation-associated-protein 1 [Source:MGI Symbol;Acc:MGI:1338002]
																ENSMUSG00000040536	1.546	2.702	5.411	1.366	1.41	1.078	3.21967	1.28467	-1.32552	0.00112038	0.00849314	Necab1	Down	N-terminal EF-hand calcium binding protein 1 [Source:MGI Symbol;Acc:MGI:1916602]
																ENSMUSG00000029757	12.894	16.498	23.449	8.011	6.663	6.421	17.6137	7.03167	-1.32476	7.18e-09	3.7e-07	Dync1i1	Down	dynein cytoplasmic 1 intermediate chain 1 [Source:MGI Symbol;Acc:MGI:107743]
																ENSMUSG00000045667	2.504	1.98	3.897	0.627	1.014	1.705	2.79367	1.11533	-1.32468	0.00286826	0.018049	Smtnl2	Down	smoothelin-like 2 [Source:MGI Symbol;Acc:MGI:2442764]
																ENSMUSG00000032484	4.255	5.314	3.466	1.25	2.324	1.648	4.345	1.74067	-1.31972	0.00533394	0.0290241	Ngp	Down	neutrophilic granule protein [Source:MGI Symbol;Acc:MGI:105983]
																ENSMUSG00000031543	7.675	11.39	15.007	4.949	4.147	4.588	11.3573	4.56133	-1.3161	1.21e-11	1.34e-09	Ank1	Down	ankyrin 1, erythroid [Source:MGI Symbol;Acc:MGI:88024]
																ENSMUSG00000062329	6.133	6.049	8.449	2.8	2.052	3.445	6.877	2.76567	-1.31415	0.00137399	0.0100341	Cytl1	Down	cytokine-like 1 [Source:MGI Symbol;Acc:MGI:2684993]
																ENSMUSG00000035653	1.683	2.243	3.855	1.177	1.303	0.65	2.59367	1.04333	-1.31379	0.00240973	0.0157909	Lrfn5	Down	leucine rich repeat and fibronectin type III domain containing 5 [Source:MGI Symbol;Acc:MGI:2144814]
																ENSMUSG00000044349	3.264	4.327	6.645	2.028	2.26	1.45	4.74533	1.91267	-1.31092	8.44e-06	0.000162894	Snhg11	Down	small nucleolar RNA host gene 11 [Source:MGI Symbol;Acc:MGI:2441845]
																ENSMUSG00000043843	1.412	2.536	2.971	0.902	0.915	0.973	2.30633	0.93	-1.3103	0.00486332	0.0270584	Tmem145	Down	transmembrane protein 145 [Source:MGI Symbol;Acc:MGI:3607779]
																ENSMUSG00000022208	15.034	16.119	19.908	6.699	7.622	6.276	17.0203	6.86567	-1.30979	7.06e-13	1.17e-10	Jph4	Down	junctophilin 4 [Source:MGI Symbol;Acc:MGI:2443113]
																ENSMUSG00000042873	6.319	7.749	14.418	4.122	3.884	3.5	9.49533	3.83533	-1.30787	1.22e-06	3.15e-05	Lhfpl4	Down	lipoma HMGIC fusion partner-like protein 4 [Source:MGI Symbol;Acc:MGI:3057108]
																ENSMUSG00000062444	16.83	17.029	22.639	8.313	8.05	6.478	18.8327	7.61367	-1.30657	1.27e-12	1.9e-10	Ap3b2	Down	adaptor-related protein complex 3, beta 2 subunit [Source:MGI Symbol;Acc:MGI:1100869]
																ENSMUSG00000055629	3.235	3.111	3.88	1.289	1.716	1.132	3.40867	1.379	-1.30559	4.99e-05	0.000701028	B4galnt4	Down	beta-1,4-N-acetyl-galactosaminyl transferase 4 [Source:MGI Symbol;Acc:MGI:2652891]
																ENSMUSG00000044433	3.631	4.049	5.355	2.077	1.636	1.563	4.345	1.75867	-1.30487	0.00261495	0.0168364	Camsap3	Down	calmodulin regulated spectrin-associated protein family, member 3 [Source:MGI Symbol;Acc:MGI:1916947]
																ENSMUSG00000034813	1.331	1.661	2.694	0.804	0.819	0.679	1.89533	0.767333	-1.30453	0.00790921	0.0393391	Grip1	Down	glutamate receptor interacting protein 1 [Source:MGI Symbol;Acc:MGI:1921303]
																ENSMUSG00000044716	6.55	6.689	9.219	3.057	3.529	2.54	7.486	3.042	-1.29917	1.08e-06	2.83e-05	Dok7	Down	docking protein 7 [Source:MGI Symbol;Acc:MGI:3584043]
																ENSMUSG00000031837	1.96	3.408	6.369	1.27	1.916	1.585	3.91233	1.59033	-1.2987	0.00674177	0.0348872	Necab2	Down	N-terminal EF-hand calcium binding protein 2 [Source:MGI Symbol;Acc:MGI:2152211]
																ENSMUSG00000056665	11.038	14.154	21.436	7.094	6.427	5.453	15.5427	6.32467	-1.29717	1.92e-06	4.64e-05	Them6	Down	thioesterase superfamily member 6 [Source:MGI Symbol;Acc:MGI:1925301]
																ENSMUSG00000027489	3.992	6.509	9.263	3.221	2.07	2.752	6.588	2.681	-1.29707	0.000445567	0.00406001	Necab3	Down	N-terminal EF-hand calcium binding protein 3 [Source:MGI Symbol;Acc:MGI:1861721]
																ENSMUSG00000003863	5.121	4.84	7.664	2.424	2.415	2.352	5.875	2.397	-1.29336	9.36e-08	3.4e-06	Ppfia3	Down	protein tyrosine phosphatase, receptor type, f polypeptide (PTPRF), interacting protein (liprin), alpha 3 [Source:MGI Symbol;Acc:MGI:1924037]
																ENSMUSG00000034059	6.491	3.898	7.69	2.539	2.841	2.002	6.02633	2.46067	-1.29223	0.000710413	0.00588535	Ypel4	Down	yippee like 4 [Source:MGI Symbol;Acc:MGI:3605071]
																ENSMUSG00000024403	39.458	41.427	50.064	20.031	19.016	14.431	43.6497	17.826	-1.29199	1.39e-13	2.89e-11	Atp6v1g2	Down	ATPase, H+ transporting, lysosomal V1 subunit G2 [Source:MGI Symbol;Acc:MGI:1913487]
																ENSMUSG00000074657	41.014	49.769	68.858	23.867	21.319	20.132	53.2137	21.7727	-1.28928	2.44e-14	6.2e-12	Kif5a	Down	kinesin family member 5A [Source:MGI Symbol;Acc:MGI:109564]
																ENSMUSG00000040258	3.699	4.953	3.829	2.019	1.633	1.469	4.16033	1.707	-1.28524	0.00120996	0.00899627	Nxph4	Down	neurexophilin 4 [Source:MGI Symbol;Acc:MGI:1336197]
																ENSMUSG00000044647	1.192	1.893	3.107	0.889	0.789	0.865	2.064	0.847667	-1.28387	4.89e-05	0.000691999	Csrnp3	Down	cysteine-serine-rich nuclear protein 3 [Source:MGI Symbol;Acc:MGI:1925021]
																ENSMUSG00000040856	8.643	7.099	8.423	2.374	5.594	1.965	8.055	3.311	-1.28262	1.43e-05	0.00025153	Dlk1	Down	delta like non-canonical Notch ligand 1 [Source:MGI Symbol;Acc:MGI:94900]
																ENSMUSG00000054679	1.163	1.834	3.281	0.849	0.789	0.945	2.09267	0.861	-1.28126	0.0106631	0.0492016	Srsf12	Down	serine and arginine-rich splicing factor 12 [Source:MGI Symbol;Acc:MGI:2661424]
																ENSMUSG00000037217	38.073	35.238	51.354	18.461	17.856	14.984	41.555	17.1003	-1.281	2.05e-13	4.03e-11	Syn1	Down	synapsin I [Source:MGI Symbol;Acc:MGI:98460]
																ENSMUSG00000015599	6.806	8.098	9.505	3.541	3.239	3.268	8.13633	3.34933	-1.2805	1.65e-12	2.42e-10	Ttbk1	Down	tau tubulin kinase 1 [Source:MGI Symbol;Acc:MGI:2147036]
																ENSMUSG00000058975	6.349	8.836	8.105	3.213	3.442	2.95	7.76333	3.20167	-1.27785	2.61e-08	1.13e-06	Kcnc1	Down	potassium voltage gated channel, Shaw-related subfamily, member 1 [Source:MGI Symbol;Acc:MGI:96667]
																ENSMUSG00000041670	1.544	2.005	4.324	1.142	1.22	0.885	2.62433	1.08233	-1.27781	0.00047399	0.00425037	Rims1	Down	regulating synaptic membrane exocytosis 1 [Source:MGI Symbol;Acc:MGI:2152971]
																ENSMUSG00000025270	4.811	6.967	9.772	4.383	1.952	2.563	7.18333	2.966	-1.27613	0.000630538	0.00534123	Alas2	Down	aminolevulinic acid synthase 2, erythroid [Source:MGI Symbol;Acc:MGI:87990]
																ENSMUSG00000058248	0.901	1.08	1.784	0.552	0.479	0.525	1.255	0.518667	-1.27481	0.000737375	0.00605869	Kcnh1	Down	potassium voltage-gated channel, subfamily H (eag-related), member 1 [Source:MGI Symbol;Acc:MGI:1341721]
																ENSMUSG00000036198	7.733	7.81	7.262	3.585	2.393	3.457	7.60167	3.145	-1.27326	2.93e-08	1.24e-06	Arhgap36	Down	Rho GTPase activating protein 36 [Source:MGI Symbol;Acc:MGI:1922654]
																ENSMUSG00000064293	1.643	2.272	2.066	0.872	1.014	0.589	1.99367	0.825	-1.27296	0.00190146	0.0130028	Cntn4	Down	contactin 4 [Source:MGI Symbol;Acc:MGI:1095737]
																ENSMUSG00000030350	1.462	2.958	3.154	0.681	1.39	1.068	2.52467	1.04633	-1.27075	0.00630596	0.0331159	Prmt8	Down	protein arginine N-methyltransferase 8 [Source:MGI Symbol;Acc:MGI:3043083]
																ENSMUSG00000043342	5.749	6.586	9.178	3.32	3.25	2.356	7.171	2.97533	-1.26912	3.41e-05	0.000525156	Hoxd9	Down	homeobox D9 [Source:MGI Symbol;Acc:MGI:96210]
																ENSMUSG00000042251	7.953	6.518	8.283	2.656	4.39	2.4	7.58467	3.14867	-1.26834	3.65e-05	0.000548997	Pm20d1	Down	peptidase M20 domain containing 1 [Source:MGI Symbol;Acc:MGI:2442939]
																ENSMUSG00000047013	1.845	1.703	2.418	0.749	0.778	0.95	1.98867	0.825667	-1.26817	3e-05	0.000472199	Fbxo41	Down	F-box protein 41 [Source:MGI Symbol;Acc:MGI:1261912]
																ENSMUSG00000056158	4.697	6.56	9.853	3.196	2.456	3.114	7.03667	2.922	-1.26794	1.62e-05	0.000279254	Car10	Down	carbonic anhydrase 10 [Source:MGI Symbol;Acc:MGI:1919855]
																ENSMUSG00000057060	2.255	2.892	3.078	1.365	1.309	0.744	2.74167	1.13933	-1.26686	0.000541924	0.00473953	Slc35f3	Down	solute carrier family 35, member F3 [Source:MGI Symbol;Acc:MGI:2444426]
																ENSMUSG00000048647	1.192	1.459	1.053	0.379	0.718	0.444	1.23467	0.513667	-1.26522	0.00752701	0.0378551	Exd1	Down	exonuclease 3'-5' domain containing 1 [Source:MGI Symbol;Acc:MGI:3045306]
																ENSMUSG00000045994	15.125	13.727	17.302	7.38	5.508	6.314	15.3847	6.40067	-1.2652	2.35e-12	3.37e-10	B3gat1	Down	beta-1,3-glucuronyltransferase 1 [Source:MGI Symbol;Acc:MGI:1924148]
																ENSMUSG00000027419	6.957	7.383	12.632	4.112	3.43	3.694	8.99067	3.74533	-1.26333	2.05e-07	6.84e-06	Pcsk2	Down	proprotein convertase subtilisin/kexin type 2 [Source:MGI Symbol;Acc:MGI:97512]
																ENSMUSG00000038555	16.313	20.415	30.977	10.479	9.175	8.595	22.5683	9.41633	-1.26106	1.57e-07	5.42e-06	Reep2	Down	receptor accessory protein 2 [Source:MGI Symbol;Acc:MGI:2385070]
																ENSMUSG00000025329	1.297	1.377	1.676	0.668	0.7	0.447	1.45	0.605	-1.26105	0.00503502	0.0278672	Padi1	Down	peptidyl arginine deiminase, type I [Source:MGI Symbol;Acc:MGI:1338893]
																ENSMUSG00000071234	2.851	2.768	2.438	1.429	1.074	0.867	2.68567	1.12333	-1.25749	0.0053617	0.0291137	Syndig1l	Down	synapse differentiation inducing 1 like [Source:MGI Symbol;Acc:MGI:2685107]
																ENSMUSG00000105867	2.392	4.68	4.972	2.536	1.478	1.028	4.01467	1.68067	-1.25625	0.00696683	0.0357035	Tmem217rt	Down	transmembrane 217, retrotransposed [Source:MGI Symbol;Acc:MGI:5662654]
																ENSMUSG00000030806	29.296	33.641	30.788	15.037	12.035	12.206	31.2417	13.0927	-1.25471	8.24e-20	7.09e-17	Stx1b	Down	syntaxin 1B [Source:MGI Symbol;Acc:MGI:1930705]
																ENSMUSG00000034171	10.089	9.395	13.155	4.219	4.645	4.822	10.8797	4.562	-1.2539	4.8e-10	3.53e-08	Faah	Down	fatty acid amide hydrolase [Source:MGI Symbol;Acc:MGI:109609]
																ENSMUSG00000047109	7.973	5.822	6.146	2.77	1.988	3.608	6.647	2.78867	-1.25313	0.000559296	0.0048562	Cldn14	Down	claudin 14 [Source:MGI Symbol;Acc:MGI:1860425]
																ENSMUSG00000021061	8.478	9.225	10.556	4.231	3.559	4.066	9.41967	3.952	-1.25309	5.96e-18	3.16e-15	Sptb	Down	spectrin beta, erythrocytic [Source:MGI Symbol;Acc:MGI:98387]
																ENSMUSG00000031409	7.7	3.849	9.097	2.634	2.962	3.068	6.882	2.888	-1.25276	0.0032615	0.0200213	Tceal6	Down	transcription elongation factor A (SII)-like 6 [Source:MGI Symbol;Acc:MGI:1923939]
																ENSMUSG00000042532	5.878	5.835	7.631	3.285	2.459	2.377	6.448	2.707	-1.25216	3.57e-06	7.94e-05	Golga7b	Down	golgin A7B [Source:MGI Symbol;Acc:MGI:1918396]
																ENSMUSG00000040035	24.25	24.882	27.159	12.069	10.057	9.917	25.4303	10.681	-1.2515	2.01e-20	1.82e-17	Disp2	Down	dispatched RND transporter family member 2 [Source:MGI Symbol;Acc:MGI:2388733]
																ENSMUSG00000047428	6.441	8.073	8.371	2.896	3.31	3.434	7.62833	3.21333	-1.2473	4.46e-05	0.000638863	Dlk2	Down	delta like non-canonical Notch ligand 2 [Source:MGI Symbol;Acc:MGI:2146838]
																ENSMUSG00000055078	1.969	2.81	2.982	1.255	0.952	1.065	2.587	1.09067	-1.24607	0.0019267	0.0131604	Gabra5	Down	gamma-aminobutyric acid type A receptor subunit alpha 5 [Source:MGI Symbol;Acc:MGI:95617]
																ENSMUSG00000017868	3.759	3.772	4.287	1.701	1.742	1.547	3.93933	1.66333	-1.24387	8.95e-05	0.00112456	Sgk2	Down	serum/glucocorticoid regulated kinase 2 [Source:MGI Symbol;Acc:MGI:1351318]
																ENSMUSG00000023033	6.477	6.514	7.559	2.935	2.206	3.539	6.85	2.89333	-1.24337	3.55e-14	8.43e-12	Scn8a	Down	sodium channel, voltage-gated, type VIII, alpha [Source:MGI Symbol;Acc:MGI:103169]
																ENSMUSG00000038576	13.786	14.295	18.308	6.154	6.794	6.685	15.463	6.54433	-1.2405	1.91e-10	1.58e-08	Susd4	Down	sushi domain containing 4 [Source:MGI Symbol;Acc:MGI:2138351]
																ENSMUSG00000102252	98.599	110.758	159.589	57.358	53.281	45.63	122.982	52.0897	-1.23938	3.2e-12	4.42e-10	Snrpn	Down	small nuclear ribonucleoprotein N [Source:MGI Symbol;Acc:MGI:98347]
																ENSMUSG00000033949	6.585	8.504	17.378	4.168	4.454	5.186	10.8223	4.60267	-1.23347	0.000351742	0.0033434	Trim36	Down	tripartite motif-containing 36 [Source:MGI Symbol;Acc:MGI:106264]
																ENSMUSG00000014846	283.203	267.545	493.389	153.707	139.826	150.868	348.046	148.134	-1.23238	8.97e-11	8.14e-09	Tppp3	Down	tubulin polymerization-promoting protein family member 3 [Source:MGI Symbol;Acc:MGI:1915221]
																ENSMUSG00000045348	6.157	7.55	11.108	3.756	3.323	3.483	8.27167	3.52067	-1.23233	1.1e-06	2.88e-05	Nyap1	Down	neuronal tyrosine-phosphorylated phosphoinositide 3-kinase adaptor 1 [Source:MGI Symbol;Acc:MGI:2443880]
																ENSMUSG00000031144	75.446	81.076	101.869	39.326	33.208	37.685	86.1303	36.7397	-1.22918	5.44e-19	3.97e-16	Syp	Down	synaptophysin [Source:MGI Symbol;Acc:MGI:98467]
																ENSMUSG00000003418	1.583	3.141	3.971	1.676	1.036	0.998	2.89833	1.23667	-1.22877	0.00033002	0.00318725	St8sia6	Down	ST8 alpha-N-acetyl-neuraminide alpha-2,8-sialyltransferase 6 [Source:MGI Symbol;Acc:MGI:2386797]
																ENSMUSG00000021919	2.086	4.165	2.16	1.705	1.14	0.744	2.80367	1.19633	-1.2287	0.00209362	0.0140613	Chat	Down	choline acetyltransferase [Source:MGI Symbol;Acc:MGI:88392]
																ENSMUSG00000039419	4.484	6.904	13.313	4.432	3.119	3.016	8.23367	3.52233	-1.225	2.48e-05	0.00039863	Cntnap2	Down	contactin associated protein-like 2 [Source:MGI Symbol;Acc:MGI:1914047]
																ENSMUSG00000056222	33.188	35.067	37.044	18.956	12.974	13.147	35.0997	15.0257	-1.22403	2.64e-15	8.07e-13	Spock1	Down	sparc/osteonectin, cwcv and kazal-like domains proteoglycan 1 [Source:MGI Symbol;Acc:MGI:105371]
																ENSMUSG00000027950	3.298	3.678	5.867	1.573	1.945	1.984	4.281	1.834	-1.22295	3.29e-06	7.38e-05	Chrnb2	Down	cholinergic receptor nicotinic beta 2 subunit [Source:MGI Symbol;Acc:MGI:87891]
																ENSMUSG00000031285	0.844	0.983	0.587	0.323	0.382	0.304	0.785	0.336333	-1.2228	0.000187739	0.00201579	Dcx	Down	doublecortin [Source:MGI Symbol;Acc:MGI:1277171]
																ENSMUSG00000027270	16.467	18.882	14.671	8.036	6.026	7.38	16.6733	7.14733	-1.22207	1.16e-08	5.6e-07	Lamp5	Down	lysosomal-associated membrane protein family, member 5 [Source:MGI Symbol;Acc:MGI:1923411]
																ENSMUSG00000049097	2.741	2.979	2.389	1.478	1.222	0.779	2.703	1.15967	-1.22085	0.00305728	0.019046	Ankrd34a	Down	ankyrin repeat domain 34A [Source:MGI Symbol;Acc:MGI:3617846]
																ENSMUSG00000031872	5.42	5.224	12.469	3.756	3.687	2.481	7.70433	3.308	-1.21971	0.00373471	0.0221434	Bean1	Down	brain expressed, associated with Nedd4, 1 [Source:MGI Symbol;Acc:MGI:1929597]
																ENSMUSG00000022629	19.743	30.51	44.42	13.96	16.615	10.076	31.5577	13.5503	-1.21966	1.09e-06	2.87e-05	Kif21a	Down	kinesin family member 21A [Source:MGI Symbol;Acc:MGI:109188]
																ENSMUSG00000017740	13.342	13.964	12.356	6.774	4.626	5.631	13.2207	5.677	-1.21959	1.18e-12	1.8e-10	Slc12a5	Down	solute carrier family 12, member 5 [Source:MGI Symbol;Acc:MGI:1862037]
																ENSMUSG00000062296	1.083	0.96	1.53	0.591	0.51	0.436	1.191	0.512333	-1.21702	0.000178866	0.00194833	Trank1	Down	tetratricopeptide repeat and ankyrin repeat containing 1 [Source:MGI Symbol;Acc:MGI:1341834]
																ENSMUSG00000022218	17.993	30.938	22.694	11.15	11.259	8.409	23.875	10.2727	-1.21669	2.71e-09	1.58e-07	Tgm1	Down	transglutaminase 1, K polypeptide [Source:MGI Symbol;Acc:MGI:98730]
																ENSMUSG00000042216	4.145	5.23	6.945	2.753	2.276	2.008	5.44	2.34567	-1.21361	1.35e-06	3.41e-05	Sgsm1	Down	small G protein signaling modulator 1 [Source:MGI Symbol;Acc:MGI:107320]
																ENSMUSG00000031111	34.105	40.03	49.865	19.18	18.178	16.123	41.3333	17.827	-1.21324	1.72e-13	3.49e-11	Igsf1	Down	immunoglobulin superfamily, member 1 [Source:MGI Symbol;Acc:MGI:2147913]
																ENSMUSG00000048895	5.294	5.345	8.939	2.438	2.578	3.461	6.526	2.82567	-1.20761	2.4e-05	0.000389815	Cdk5r1	Down	cyclin dependent kinase 5, regulatory subunit 1 [Source:MGI Symbol;Acc:MGI:101764]
																ENSMUSG00000038319	9.993	10.541	11.415	4.277	5.283	4.279	10.6497	4.613	-1.20703	2.66e-09	1.56e-07	Kcnh2	Down	potassium voltage-gated channel, subfamily H (eag-related), member 2 [Source:MGI Symbol;Acc:MGI:1341722]
																ENSMUSG00000042115	5.131	5.014	6.775	2.504	2.291	2.541	5.64	2.44533	-1.20566	2.49e-07	8.12e-06	Klhdc8a	Down	kelch domain containing 8A [Source:MGI Symbol;Acc:MGI:2442630]
																ENSMUSG00000059003	0.491	0.551	0.662	0.291	0.208	0.24	0.568	0.246333	-1.20528	0.00075081	0.00613835	Grin2a	Down	glutamate receptor, ionotropic, NMDA2A (epsilon 1) [Source:MGI Symbol;Acc:MGI:95820]
																ENSMUSG00000059361	17.64	14.38	13.724	7.798	6.29	5.765	15.248	6.61767	-1.20423	2.67e-06	6.16e-05	Nrsn2	Down	neurensin 2 [Source:MGI Symbol;Acc:MGI:2684969]
																ENSMUSG00000075334	4.319	4.694	9.947	1.943	3.53	2.758	6.32	2.74367	-1.20382	0.00580537	0.0309643	Rprm	Down	reprimo, TP53 dependent G2 arrest mediator candidate [Source:MGI Symbol;Acc:MGI:1915124]
																ENSMUSG00000029001	35.505	34.665	40.375	19.285	16.957	11.929	36.8483	16.057	-1.1984	9.09e-09	4.53e-07	Fbxo44	Down	F-box protein 44 [Source:MGI Symbol;Acc:MGI:1354744]
																ENSMUSG00000058297	72.865	90.103	129.429	45.675	37.472	44.286	97.4657	42.4777	-1.19819	7.65e-12	9.21e-10	Spock2	Down	sparc/osteonectin, cwcv and kazal-like domains proteoglycan 2 [Source:MGI Symbol;Acc:MGI:1891351]
																ENSMUSG00000082229	10.277	14.39	16.3	6.86	6.187	4.81	13.6557	5.95233	-1.19797	4.86e-07	1.41e-05	Nap1l2	Down	nucleosome assembly protein 1-like 2 [Source:MGI Symbol;Acc:MGI:106654]
																ENSMUSG00000019853	17.943	14.53	19.915	6.094	10.316	6.441	17.4627	7.617	-1.19698	0.00171158	0.0119625	Hebp2	Down	heme binding protein 2 [Source:MGI Symbol;Acc:MGI:1860084]
																ENSMUSG00000069814	1.99	2.464	2.449	1.254	0.867	0.894	2.301	1.005	-1.19507	0.000607732	0.00517963	Ccdc92b	Down	coiled-coil domain containing 92B [Source:MGI Symbol;Acc:MGI:3588240]
																ENSMUSG00000048142	17.283	23.961	22.002	10.61	8.474	8.548	21.082	9.21067	-1.19463	2.76e-14	6.74e-12	Nat8l	Down	N-acetyltransferase 8-like [Source:MGI Symbol;Acc:MGI:2447776]
																ENSMUSG00000043670	14.236	15.066	22.622	7.647	7.053	8.03	17.308	7.57667	-1.1918	8.66e-09	4.37e-07	Diras1	Down	DIRAS family, GTP-binding RAS-like 1 [Source:MGI Symbol;Acc:MGI:2183442]
																ENSMUSG00000025582	4.708	6.177	8.769	3.137	3.004	2.465	6.55133	2.86867	-1.19141	2.29e-06	5.4e-05	Nptx1	Down	neuronal pentraxin 1 [Source:MGI Symbol;Acc:MGI:107811]
																ENSMUSG00000033061	50.572	52.567	78.311	30.337	26.859	22.28	60.4833	26.492	-1.19098	1.37e-07	4.81e-06	Resp18	Down	regulated endocrine-specific protein 18 [Source:MGI Symbol;Acc:MGI:1098222]
																ENSMUSG00000029219	4.876	6.657	4.889	3.482	1.604	2.108	5.474	2.398	-1.19076	0.00366303	0.0218115	Slc10a4	Down	solute carrier family 10 (sodium/bile acid cotransporter family), member 4 [Source:MGI Symbol;Acc:MGI:3606480]
																ENSMUSG00000034245	66.969	58.105	74.445	30.438	28.666	28.331	66.5063	29.145	-1.19024	3.16e-17	1.44e-14	Hdac11	Down	histone deacetylase 11 [Source:MGI Symbol;Acc:MGI:2385252]
																ENSMUSG00000052105	4.529	5.584	7.802	2.786	2.328	2.74	5.97167	2.618	-1.18967	2.83e-07	8.96e-06	Mtcl1	Down	microtubule crosslinking factor 1 [Source:MGI Symbol;Acc:MGI:1915867]
																ENSMUSG00000037428	51.421	27.799	51.653	23.337	16.033	18.066	43.6243	19.1453	-1.18814	1.54e-07	5.35e-06	Vgf	Down	VGF nerve growth factor inducible [Source:MGI Symbol;Acc:MGI:1343180]
																ENSMUSG00000041708	3.422	3.572	3.966	1.637	1.664	1.51	3.65333	1.60367	-1.18784	9.28e-06	0.000175927	Mpped1	Down	metallophosphoesterase domain containing 1 [Source:MGI Symbol;Acc:MGI:106316]
																ENSMUSG00000034825	4.98	8.119	14.702	5.357	3.589	3.29	9.267	4.07867	-1.184	0.000460129	0.00416121	Nrip3	Down	nuclear receptor interacting protein 3 [Source:MGI Symbol;Acc:MGI:1925843]
																ENSMUSG00000063646	9.174	9.891	15.93	5.71	4.678	5.022	11.665	5.13667	-1.18328	4.17e-06	8.98e-05	Jakmip1	Down	janus kinase and microtubule interacting protein 1 [Source:MGI Symbol;Acc:MGI:1923321]
																ENSMUSG00000086040	2.097	2.708	6.929	1.656	1.661	1.854	3.91133	1.72367	-1.18218	0.00350002	0.0211265	Wipf3	Down	WAS/WASL interacting protein family, member 3 [Source:MGI Symbol;Acc:MGI:3044681]
																ENSMUSG00000027273	88.376	127.097	118.876	67.634	37.681	42.098	111.45	49.1377	-1.18149	9.97e-09	4.89e-07	Snap25	Down	synaptosomal-associated protein 25 [Source:MGI Symbol;Acc:MGI:98331]
																ENSMUSG00000030898	2.107	1.682	2.691	0.89	1.145	0.826	2.16	0.953667	-1.17947	0.0101901	0.0475291	Cckbr	Down	cholecystokinin B receptor [Source:MGI Symbol;Acc:MGI:99479]
																ENSMUSG00000073102	5.014	4.185	3.33	2.296	1.788	1.448	4.17633	1.844	-1.1794	0.000915882	0.00720419	Drc1	Down	dynein regulatory complex subunit 1 [Source:MGI Symbol;Acc:MGI:2685906]
																ENSMUSG00000004961	8.888	7.821	23.178	4.052	6.127	7.446	13.2957	5.875	-1.1783	0.00860271	0.0419225	Syt5	Down	synaptotagmin V [Source:MGI Symbol;Acc:MGI:1926368]
																ENSMUSG00000052852	28.531	37.722	51.658	18.043	17.424	16.646	39.3037	17.371	-1.17798	2.88e-10	2.31e-08	Reep1	Down	receptor accessory protein 1 [Source:MGI Symbol;Acc:MGI:1098827]
																ENSMUSG00000033595	100.209	91.93	82.919	43.407	41	37.264	91.686	40.557	-1.17675	8.8e-16	3e-13	Lgi3	Down	leucine-rich repeat LGI family, member 3 [Source:MGI Symbol;Acc:MGI:2182619]
																ENSMUSG00000053318	18.871	9.35	11.015	7.168	3.043	7.146	13.0787	5.78567	-1.17666	0.00103331	0.00793381	Slamf8	Down	SLAM family member 8 [Source:MGI Symbol;Acc:MGI:1921998]
																ENSMUSG00000026163	4.177	4.993	5.96	2.411	2.237	2.069	5.04333	2.239	-1.17152	2.28e-08	1.01e-06	Sphkap	Down	SPHK1 interactor, AKAP domain containing [Source:MGI Symbol;Acc:MGI:1924879]
																ENSMUSG00000032087	2.658	1.083	1.854	0.585	0.892	1.007	1.865	0.828	-1.17147	0.00256332	0.0165808	Dscaml1	Down	DS cell adhesion molecule like 1 [Source:MGI Symbol;Acc:MGI:2150309]
																ENSMUSG00000045589	3.489	4.216	4.456	2.096	1.45	1.854	4.05367	1.8	-1.17123	1.82e-07	6.2e-06	Frrs1l	Down	ferric-chelate reductase 1 like [Source:MGI Symbol;Acc:MGI:2442704]
																ENSMUSG00000030109	13.247	7.166	9.1	3.866	5.233	4.05	9.83767	4.383	-1.1664	0.000132026	0.00151264	Slc6a12	Down	solute carrier family 6 (neurotransmitter transporter, betaine/GABA), member 12 [Source:MGI Symbol;Acc:MGI:95628]
																ENSMUSG00000006575	37.792	38.96	57.966	21.892	19.793	18.385	44.906	20.0233	-1.16523	8.19e-10	5.65e-08	Rundc3a	Down	RUN domain containing 3A [Source:MGI Symbol;Acc:MGI:1858752]
																ENSMUSG00000046613	1.461	1.837	2.412	1.197	0.573	0.778	1.90333	0.849333	-1.16413	0.00298296	0.0186797	Vwa5b2	Down	von Willebrand factor A domain containing 5B2 [Source:MGI Symbol;Acc:MGI:2681859]
																ENSMUSG00000010154	6.79	7.225	11.933	3.558	4.362	3.662	8.64933	3.86067	-1.16374	4.06e-05	0.000593183	Spire2	Down	spire type actin nucleation factor 2 [Source:MGI Symbol;Acc:MGI:2446256]
																ENSMUSG00000027584	2.999	5.085	4.095	2.044	1.894	1.5	4.05967	1.81267	-1.16325	0.000701564	0.0058254	Oprl1	Down	opioid receptor-like 1 [Source:MGI Symbol;Acc:MGI:97440]
																ENSMUSG00000070366	7.986	9.72	8.575	3.861	4.071	3.829	8.76033	3.92033	-1.16001	0.000190505	0.00204064	Plpp4	Down	phospholipid phosphatase 4 [Source:MGI Symbol;Acc:MGI:2685936]
																ENSMUSG00000039481	4.542	6.582	6.388	2.559	2.879	2.405	5.83733	2.61433	-1.15887	0.00617951	0.032556	Nrtn	Down	neurturin [Source:MGI Symbol;Acc:MGI:108417]
																ENSMUSG00000035964	31.831	27.581	37.905	15.146	13.968	14.478	32.439	14.5307	-1.15863	8.78e-10	5.99e-08	Tmem59l	Down	transmembrane protein 59-like [Source:MGI Symbol;Acc:MGI:1915187]
																ENSMUSG00000102697	1.947	3.398	6.168	1.976	2.119	1.072	3.83767	1.72233	-1.15587	0.0036148	0.0216528	Pcdhac2	Down	protocadherin alpha subfamily C, 2 [Source:MGI Symbol;Acc:MGI:1891443]
																ENSMUSG00000048038	0.552	0.745	0.884	0.321	0.224	0.434	0.727	0.326333	-1.15561	0.00740351	0.0373693	Ccdc187	Down	coiled-coil domain containing 187 [Source:MGI Symbol;Acc:MGI:3045295]
																ENSMUSG00000049583	1.979	2.173	2.857	1.088	1.02	1.042	2.33633	1.05	-1.15386	1.55e-05	0.000268607	Grm5	Down	glutamate receptor, metabotropic 5 [Source:MGI Symbol;Acc:MGI:1351342]
																ENSMUSG00000062380	99.553	68.779	90.419	47.89	32.434	36.045	86.2503	38.7897	-1.15286	1.27e-06	3.26e-05	Tubb3	Down	tubulin, beta 3 class III [Source:MGI Symbol;Acc:MGI:107813]
																ENSMUSG00000041073	28.504	26.065	39.433	18.551	11.427	12.33	31.334	14.1027	-1.15176	2.54e-08	1.11e-06	Nacad	Down	NAC alpha domain containing [Source:MGI Symbol;Acc:MGI:3603030]
																ENSMUSG00000025175	8.537	8.887	10.374	4.631	3.046	4.843	9.266	4.17333	-1.15075	0.000509346	0.00451364	Fn3k	Down	fructosamine 3 kinase [Source:MGI Symbol;Acc:MGI:1926834]
																ENSMUSG00000029121	11.478	10.633	18.823	7.207	6.269	4.977	13.6447	6.151	-1.14944	6.62e-06	0.000131876	Crmp1	Down	collapsin response mediator protein 1 [Source:MGI Symbol;Acc:MGI:107793]
																ENSMUSG00000074736	10.817	8.743	8.269	3.991	5.13	3.437	9.27633	4.186	-1.14798	0.0001221	0.00143283	Syndig1	Down	synapse differentiation inducing 1 [Source:MGI Symbol;Acc:MGI:3702158]
																ENSMUSG00000005338	63.856	68.042	85.513	36.17	30.248	31.704	72.4703	32.7073	-1.14778	1.07e-15	3.48e-13	Cadm3	Down	cell adhesion molecule 3 [Source:MGI Symbol;Acc:MGI:2137858]
																ENSMUSG00000025735	6.113	4.669	4.511	2.576	2.813	1.514	5.09767	2.301	-1.14758	0.0040964	0.0237042	Rhbdl1	Down	rhomboid like 1 [Source:MGI Symbol;Acc:MGI:2384891]
																ENSMUSG00000059213	5.406	8.819	12.817	3.146	5.329	3.733	9.014	4.06933	-1.14737	2.28e-05	0.000373371	Ddn	Down	dendrin [Source:MGI Symbol;Acc:MGI:108101]
																ENSMUSG00000045083	1.382	1.097	2.012	0.483	0.75	0.797	1.497	0.676667	-1.14556	0.00628659	0.0330238	Lingo2	Down	leucine rich repeat and Ig domain containing 2 [Source:MGI Symbol;Acc:MGI:2442298]
																ENSMUSG00000028931	43.289	57.064	85.618	29.901	25.132	29.049	61.9903	28.0273	-1.14521	1.06e-09	7.02e-08	Kcnab2	Down	potassium voltage-gated channel, shaker-related subfamily, beta member 2 [Source:MGI Symbol;Acc:MGI:109239]
																ENSMUSG00000038526	67.322	58.481	81.67	29.779	33.328	30.713	69.1577	31.2733	-1.14496	9.94e-12	1.14e-09	Car14	Down	carbonic anhydrase 14 [Source:MGI Symbol;Acc:MGI:1344341]
																ENSMUSG00000020826	3.14	2.065	1.229	1.082	0.913	0.916	2.14467	0.970333	-1.1442	0.0041273	0.0238372	Nos2	Down	nitric oxide synthase 2, inducible [Source:MGI Symbol;Acc:MGI:97361]
																ENSMUSG00000024210	2.834	1.746	2.79	1.071	1.213	1.051	2.45667	1.11167	-1.14398	0.00951683	0.0451587	Ip6k3	Down	inositol hexaphosphate kinase 3 [Source:MGI Symbol;Acc:MGI:3045325]
																ENSMUSG00000034958	15.339	16.704	19.954	8.147	8.137	7.275	17.3323	7.853	-1.14215	1.17e-11	1.3e-09	Atcay	Down	ataxia, cerebellar, Cayman type [Source:MGI Symbol;Acc:MGI:2448730]
																ENSMUSG00000028631	2.512	3.283	4.478	1.336	1.664	1.655	3.42433	1.55167	-1.142	0.000348836	0.00332102	Kcnq4	Down	potassium voltage-gated channel, subfamily Q, member 4 [Source:MGI Symbol;Acc:MGI:1926803]
																ENSMUSG00000030000	9.685	9.031	16.777	5.466	5.698	4.92	11.831	5.36133	-1.14191	2.71e-08	1.16e-06	Add2	Down	adducin 2 [Source:MGI Symbol;Acc:MGI:87919]
																ENSMUSG00000028132	3.667	5.703	7.875	2.921	2.745	2.15	5.74833	2.60533	-1.14168	3.06e-05	0.000478532	Tlcd4	Down	TLC domain containing 4 [Source:MGI Symbol;Acc:MGI:1923195]
																ENSMUSG00000011589	7.595	10.731	13.57	6.116	3.671	4.671	10.632	4.81933	-1.14151	0.000140847	0.00159981	Fsd1	Down	fibronectin type 3 and SPRY domain-containing protein [Source:MGI Symbol;Acc:MGI:1934858]
																ENSMUSG00000024502	4.69	6.867	5.892	2.671	2.82	2.42	5.81633	2.637	-1.14121	0.000519989	0.00458545	Jakmip2	Down	janus kinase and microtubule interacting protein 2 [Source:MGI Symbol;Acc:MGI:1923467]
																ENSMUSG00000043857	2.312	2.88	2.728	1.127	1.235	1.235	2.64	1.199	-1.13871	0.000215629	0.00225232	Mgat5b	Down	mannoside acetylglucosaminyltransferase 5, isoenzyme B [Source:MGI Symbol;Acc:MGI:3606200]
																ENSMUSG00000023236	120.061	122.534	172.513	69.9	61.214	57.498	138.369	62.8707	-1.13807	8.05e-12	9.63e-10	Scg5	Down	secretogranin V [Source:MGI Symbol;Acc:MGI:98289]
																ENSMUSG00000055945	53.183	52.553	60.569	26.984	24.283	24.322	55.435	25.1963	-1.13758	3.57e-19	2.8e-16	Prr18	Down	proline rich 18 [Source:MGI Symbol;Acc:MGI:2443403]
																ENSMUSG00000050640	7.031	11.934	13.387	6.734	4.431	3.554	10.784	4.90633	-1.13618	4.96e-08	1.98e-06	Tmem150c	Down	transmembrane protein 150C [Source:MGI Symbol;Acc:MGI:3041258]
																ENSMUSG00000025855	79.712	80.514	113.393	47.005	42.232	35.323	91.2063	41.52	-1.13533	1.05e-11	1.19e-09	Prkar1b	Down	protein kinase, cAMP dependent regulatory, type I beta [Source:MGI Symbol;Acc:MGI:97759]
																ENSMUSG00000026764	20.17	31.052	37.826	15.451	12.228	12.888	29.6827	13.5223	-1.13428	5.24e-09	2.8e-07	Kif5c	Down	kinesin family member 5C [Source:MGI Symbol;Acc:MGI:1098269]
																ENSMUSG00000063142	3.85	3.883	4.961	2.099	2.029	1.656	4.23133	1.928	-1.13401	5.64e-07	1.6e-05	Kcnma1	Down	potassium large conductance calcium-activated channel, subfamily M, alpha member 1 [Source:MGI Symbol;Acc:MGI:99923]
																ENSMUSG00000023828	2.147	2.642	1.589	1.308	0.931	0.67	2.126	0.969667	-1.13258	0.00700922	0.0358805	Slc22a3	Down	solute carrier family 22 (organic cation transporter), member 3 [Source:MGI Symbol;Acc:MGI:1333817]
																ENSMUSG00000039278	67.345	58.066	73.174	33.38	29.546	27.745	66.195	30.2237	-1.13104	1.26e-13	2.64e-11	Pcsk1n	Down	proprotein convertase subtilisin/kexin type 1 inhibitor [Source:MGI Symbol;Acc:MGI:1353431]
																ENSMUSG00000035864	7.035	8.059	18.414	4.414	5.764	5.139	11.1693	5.10567	-1.12937	0.000264294	0.00265855	Syt1	Down	synaptotagmin I [Source:MGI Symbol;Acc:MGI:99667]
																ENSMUSG00000025189	2.28	2.51	3.012	1.498	1.065	1.006	2.60067	1.18967	-1.12832	8.35e-05	0.00106371	Cnnm1	Down	cyclin M1 [Source:MGI Symbol;Acc:MGI:1891366]
																ENSMUSG00000028976	2.312	1.828	2.721	0.967	0.899	1.275	2.287	1.047	-1.12719	0.0039565	0.0230647	Slc2a5	Down	solute carrier family 2 (facilitated glucose transporter), member 5 [Source:MGI Symbol;Acc:MGI:1928369]
																ENSMUSG00000052026	2.334	2.608	1.726	1.232	1.094	0.731	2.22267	1.019	-1.12514	0.00540979	0.029278	Slc6a7	Down	solute carrier family 6 (neurotransmitter transporter, L-proline), member 7 [Source:MGI Symbol;Acc:MGI:2147363]
																ENSMUSG00000006675	15.083	15.488	21.563	7.874	9.559	6.501	17.378	7.978	-1.12316	1.19e-06	3.1e-05	P4htm	Down	prolyl 4-hydroxylase, transmembrane (endoplasmic reticulum) [Source:MGI Symbol;Acc:MGI:1921693]
																ENSMUSG00000030401	20.453	22.211	32.83	13.613	11.329	9.74	25.1647	11.5607	-1.12217	7.78e-08	2.9e-06	Rtn2	Down	reticulon 2 (Z-band associated protein) [Source:MGI Symbol;Acc:MGI:107612]
																ENSMUSG00000020704	10.262	11.462	16.722	6.887	5.337	5.446	12.8153	5.89	-1.12153	1.48e-07	5.15e-06	Asic2	Down	acid-sensing ion channel 2 [Source:MGI Symbol;Acc:MGI:1100867]
																ENSMUSG00000020151	1.608	1.743	3.657	1.095	1.089	1.037	2.336	1.07367	-1.12149	0.00486162	0.0270573	Ptprr	Down	protein tyrosine phosphatase receptor type R [Source:MGI Symbol;Acc:MGI:109559]
																ENSMUSG00000035390	37.047	38.962	44.919	19.604	18.247	17.779	40.3093	18.5433	-1.12021	4.85e-15	1.39e-12	Brsk1	Down	BR serine/threonine kinase 1 [Source:MGI Symbol;Acc:MGI:2685946]
																ENSMUSG00000030854	6.794	8.724	8.936	4.168	3.515	3.593	8.15133	3.75867	-1.11682	6.34e-07	1.78e-05	Ptpn5	Down	protein tyrosine phosphatase, non-receptor type 5 [Source:MGI Symbol;Acc:MGI:97807]
																ENSMUSG00000079298	8.467	5.047	9.867	4.379	3.527	2.907	7.79367	3.60433	-1.11257	0.00413903	0.023882	Klrb1b	Down	killer cell lectin-like receptor subfamily B member 1B [Source:MGI Symbol;Acc:MGI:107539]
																ENSMUSG00000049281	7.612	5.775	12.671	3.698	4.389	3.97	8.686	4.019	-1.11186	0.000115841	0.00137547	Scn3b	Down	sodium channel, voltage-gated, type III, beta [Source:MGI Symbol;Acc:MGI:1918882]
																ENSMUSG00000003411	16.752	10.754	11.299	6.054	6.415	5.511	12.935	5.99333	-1.10985	0.000104904	0.00127237	Rab3b	Down	RAB3B, member RAS oncogene family [Source:MGI Symbol;Acc:MGI:1917158]
																ENSMUSG00000001120	19.209	22.464	35.573	10.993	14.494	10.312	25.7487	11.933	-1.10954	6.13e-06	0.000123913	Pcbp3	Down	poly(rC) binding protein 3 [Source:MGI Symbol;Acc:MGI:1890470]
																ENSMUSG00000032517	850.398	874.835	1104.98	506.578	379.71	425.533	943.406	437.274	-1.10934	1.07e-15	3.48e-13	Mobp	Down	myelin-associated oligodendrocytic basic protein [Source:MGI Symbol;Acc:MGI:108511]
																ENSMUSG00000020732	22.901	28.13	32.698	12.525	9.943	16.363	27.9097	12.9437	-1.10852	4.74e-08	1.9e-06	Rab37	Down	RAB37, member RAS oncogene family [Source:MGI Symbol;Acc:MGI:1929945]
																ENSMUSG00000037771	7.555	6.449	6.533	3.354	2.933	3.239	6.84567	3.17533	-1.10828	9.31e-06	0.000176323	Slc32a1	Down	solute carrier family 32 (GABA vesicular transporter), member 1 [Source:MGI Symbol;Acc:MGI:1194488]
																ENSMUSG00000027457	18.352	21.354	22.983	8.803	9.065	11.223	20.8963	9.697	-1.10764	2.61e-11	2.67e-09	Snph	Down	syntaphilin [Source:MGI Symbol;Acc:MGI:2139270]
																ENSMUSG00000002032	9.092	6.761	12.881	5.575	3.705	4.056	9.578	4.44533	-1.10743	0.000103178	0.00125565	Tmem25	Down	transmembrane protein 25 [Source:MGI Symbol;Acc:MGI:1918937]
																ENSMUSG00000055409	2.46	3.581	3.499	1.363	1.757	1.308	3.18	1.476	-1.10733	0.000181374	0.00196734	Nell1	Down	NEL-like 1 [Source:MGI Symbol;Acc:MGI:2443902]
																ENSMUSG00000029576	3.118	3.055	4.489	1.348	1.533	2.07	3.554	1.65033	-1.10669	0.00525982	0.0287333	Radil	Down	Ras association and DIL domains [Source:MGI Symbol;Acc:MGI:2443088]
																ENSMUSG00000027438	12.059	11.65	21.107	9.951	5.088	5.787	14.9387	6.942	-1.10563	7.31e-05	0.000951595	Napb	Down	N-ethylmaleimide sensitive fusion protein attachment protein beta [Source:MGI Symbol;Acc:MGI:104562]
																ENSMUSG00000049556	9.617	9.092	12.02	5.278	5.355	3.651	10.243	4.76133	-1.1052	5.58e-06	0.000114617	Lingo1	Down	leucine rich repeat and Ig domain containing 1 [Source:MGI Symbol;Acc:MGI:1915522]
																ENSMUSG00000009292	17.333	8.811	10.437	5.849	4.41	6.761	12.1937	5.67333	-1.10386	4.61e-07	1.36e-05	Trpm2	Down	transient receptor potential cation channel, subfamily M, member 2 [Source:MGI Symbol;Acc:MGI:1351901]
																ENSMUSG00000057897	16.92	17.768	22.043	8.973	8.787	8.656	18.9103	8.80533	-1.10273	5.6e-10	4.06e-08	Camk2b	Down	calcium/calmodulin-dependent protein kinase II, beta [Source:MGI Symbol;Acc:MGI:88257]
																ENSMUSG00000039257	5.183	5.289	4.85	1.9	1.564	3.68	5.10733	2.38133	-1.1008	0.00306335	0.0190642	Vstm2b	Down	V-set and transmembrane domain containing 2B [Source:MGI Symbol;Acc:MGI:1914525]
																ENSMUSG00000034926	21.752	23.225	39.989	12.405	12.665	14.55	28.322	13.2067	-1.10066	2.37e-07	7.8e-06	Dhcr24	Down	24-dehydrocholesterol reductase [Source:MGI Symbol;Acc:MGI:1922004]
																ENSMUSG00000056004	6.026	9.826	11.726	4.62	3.969	4.271	9.19267	4.28667	-1.10063	1.33e-05	0.000236336	Elapor2	Down	endosome-lysosome associated apoptosis and autophagy regulator family member 2 [Source:MGI Symbol;Acc:MGI:2443264]
																ENSMUSG00000017978	2.812	2.718	4.207	1.962	1.116	1.469	3.24567	1.51567	-1.09856	0.000833676	0.00668736	Cadps2	Down	Ca2+-dependent activator protein for secretion 2 [Source:MGI Symbol;Acc:MGI:2443963]
																ENSMUSG00000057455	11.071	9.103	16.038	6.037	5.831	5.072	12.0707	5.64667	-1.09603	9.15e-05	0.00114069	Rit2	Down	Ras-like without CAAX 2 [Source:MGI Symbol;Acc:MGI:108054]
																ENSMUSG00000054459	28.137	41.807	39.331	19.351	14.979	16.809	36.425	17.0463	-1.09547	2.11e-09	1.26e-07	Vsnl1	Down	visinin-like 1 [Source:MGI Symbol;Acc:MGI:1349453]
																ENSMUSG00000042425	1.482	1.776	1.886	1.149	0.647	0.612	1.71467	0.802667	-1.09506	0.00114029	0.00861302	Frmpd3	Down	FERM and PDZ domain containing 3 [Source:MGI Symbol;Acc:MGI:3646547]
																ENSMUSG00000076439	213.288	191.96	220.379	100.836	83.737	108.346	208.542	97.6397	-1.0948	8.22e-16	2.93e-13	Mog	Down	myelin oligodendrocyte glycoprotein [Source:MGI Symbol;Acc:MGI:97435]
																ENSMUSG00000028039	3.508	4.541	3.823	2.17	1.781	1.609	3.95733	1.85333	-1.09441	0.00967225	0.045673	Efna3	Down	ephrin A3 [Source:MGI Symbol;Acc:MGI:106644]
																ENSMUSG00000049265	2.729	3.66	3.938	1.46	1.822	1.555	3.44233	1.61233	-1.09424	0.000301847	0.00295627	Kcnk3	Down	potassium channel, subfamily K, member 3 [Source:MGI Symbol;Acc:MGI:1100509]
																ENSMUSG00000030495	6.231	12.589	9.605	3.307	5.955	4.055	9.475	4.439	-1.09389	1.03e-05	0.000190979	Slc7a10	Down	solute carrier family 7 (cationic amino acid transporter, y+ system), member 10 [Source:MGI Symbol;Acc:MGI:1858261]
																ENSMUSG00000040373	3.255	4.381	4.116	1.661	1.902	1.946	3.91733	1.83633	-1.09304	9.07e-05	0.0011335	Cacng5	Down	calcium channel, voltage-dependent, gamma subunit 5 [Source:MGI Symbol;Acc:MGI:2157946]
																ENSMUSG00000003452	3.08	5.045	6.775	2.279	2.576	2.13	4.96667	2.32833	-1.09298	0.00174583	0.0121455	Bicd1	Down	BICD cargo adaptor 1 [Source:MGI Symbol;Acc:MGI:1101760]
																ENSMUSG00000062591	535.265	440.771	542.468	248.891	240.446	223.695	506.168	237.677	-1.09061	2.94e-16	1.13e-13	Tubb4a	Down	tubulin, beta 4A class IVA [Source:MGI Symbol;Acc:MGI:107848]
																ENSMUSG00000039716	7.397	10.267	8.007	4.604	2.878	4.582	8.557	4.02133	-1.08943	6.56e-08	2.52e-06	Dock3	Down	dedicator of cyto-kinesis 3 [Source:MGI Symbol;Acc:MGI:2429763]
																ENSMUSG00000030226	2.709	3.324	4.652	1.978	1.328	1.73	3.56167	1.67867	-1.08524	0.0030803	0.0191367	Lmo3	Down	LIM domain only 3 [Source:MGI Symbol;Acc:MGI:102810]
																ENSMUSG00000029168	13.212	12.527	18.595	7.066	6.893	6.938	14.778	6.96567	-1.08512	1.81e-09	1.1e-07	Dpysl5	Down	dihydropyrimidinase-like 5 [Source:MGI Symbol;Acc:MGI:1929772]
																ENSMUSG00000043463	2.085	2.628	3.132	1.288	1.427	0.984	2.615	1.233	-1.08464	0.00160346	0.0113664	Rab9b	Down	RAB9B, member RAS oncogene family [Source:MGI Symbol;Acc:MGI:2442454]
																ENSMUSG00000052981	14.894	18.302	18.284	9.18	7.828	7.278	17.16	8.09533	-1.08389	5.4e-09	2.86e-07	Ube2ql1	Down	ubiquitin-conjugating enzyme E2Q family-like 1 [Source:MGI Symbol;Acc:MGI:1924230]
																ENSMUSG00000096883	5.869	5.022	6.126	3.006	1.69	3.343	5.67233	2.67967	-1.08189	5.95e-05	0.00080351	Shisa8	Down	shisa family member 8 [Source:MGI Symbol;Acc:MGI:2146080]
																ENSMUSG00000027603	10.665	11.178	14.074	5.968	5.271	5.734	11.9723	5.65767	-1.08143	2.09e-07	6.96e-06	Ggt7	Down	gamma-glutamyltransferase 7 [Source:MGI Symbol;Acc:MGI:1913385]
																ENSMUSG00000044117	32.927	32.894	42.56	20.019	16.047	15.164	36.127	17.0767	-1.08105	4.1e-10	3.09e-08	Bmerb1	Down	bMERB domain containing 1 [Source:MGI Symbol;Acc:MGI:1914504]
																ENSMUSG00000015090	6496.55	5507.27	6889.73	2829.01	3663.76	2441.29	6297.85	2978.02	-1.08051	3.71e-10	2.85e-08	Ptgds	Down	prostaglandin D2 synthase (brain) [Source:MGI Symbol;Acc:MGI:99261]
																ENSMUSG00000003974	1.996	2.839	2.024	0.859	1.138	1.247	2.28633	1.08133	-1.08022	0.00688465	0.0354135	Grm3	Down	glutamate receptor, metabotropic 3 [Source:MGI Symbol;Acc:MGI:1351340]
																ENSMUSG00000061603	5.904	7.855	10.311	4.508	3.708	3.172	8.02333	3.796	-1.07972	3.96e-09	2.2e-07	Akap6	Down	A kinase anchor protein 6 [Source:MGI Symbol;Acc:MGI:3050566]
																ENSMUSG00000041607	13786.7	11537.3	15418	6424.32	5986.35	6892.56	13580.7	6434.41	-1.07768	9.23e-17	3.88e-14	Mbp	Down	myelin basic protein [Source:MGI Symbol;Acc:MGI:96925]
																ENSMUSG00000036466	2.448	2.77	2.775	1.461	1.231	1.096	2.66433	1.26267	-1.0773	0.000130842	0.0015051	Megf11	Down	multiple EGF-like-domains 11 [Source:MGI Symbol;Acc:MGI:1920951]
																ENSMUSG00000000938	9.449	8.945	10.697	3.993	4.601	5.197	9.697	4.597	-1.07685	4.77e-05	0.000676541	Hoxa10	Down	homeobox A10 [Source:MGI Symbol;Acc:MGI:96171]
																ENSMUSG00000071719	3.707	3.538	5.387	2.261	1.668	2.06	4.21067	1.99633	-1.0767	0.000180659	0.00196194	Nalf2	Down	NALCN channel auxiliary factor 2 [Source:MGI Symbol;Acc:MGI:3648377]
																ENSMUSG00000022054	72.033	61.457	77.658	44.133	23.946	32.034	70.3827	33.371	-1.07663	1.74e-06	4.27e-05	Nefm	Down	neurofilament, medium polypeptide [Source:MGI Symbol;Acc:MGI:97314]
																ENSMUSG00000022311	0.806	1.361	1.451	0.617	0.471	0.628	1.206	0.572	-1.07614	0.00056079	0.00486448	Csmd3	Down	CUB and Sushi multiple domains 3 [Source:MGI Symbol;Acc:MGI:2386403]
																ENSMUSG00000020591	118.404	118.89	144.543	75.972	58.408	46.811	127.279	60.397	-1.07545	1.27e-09	8.12e-08	Ntsr2	Down	neurotensin receptor 2 [Source:MGI Symbol;Acc:MGI:108018]
																ENSMUSG00000018470	4.49	7.107	5.865	3.095	2.86	2.336	5.82067	2.76367	-1.0746	0.000327774	0.00316895	Kcnab3	Down	potassium voltage-gated channel, shaker-related subfamily, beta member 3 [Source:MGI Symbol;Acc:MGI:1336208]
																ENSMUSG00000033419	14.975	19.525	21.224	11.39	7.986	7.095	18.5747	8.82367	-1.07389	2.43e-08	1.07e-06	Snap91	Down	synaptosomal-associated protein 91 [Source:MGI Symbol;Acc:MGI:109132]
																ENSMUSG00000017943	11.253	11.338	18.379	6.05	7.472	5.942	13.6567	6.488	-1.07376	2.66e-05	0.000424916	Gdap1l1	Down	ganglioside-induced differentiation-associated protein 1-like 1 [Source:MGI Symbol;Acc:MGI:2385163]
																ENSMUSG00000052727	66.115	95.087	119.817	46.362	42.105	45.092	93.673	44.5197	-1.07319	1.47e-10	1.28e-08	Map1b	Down	microtubule-associated protein 1B [Source:MGI Symbol;Acc:MGI:1306778]
																ENSMUSG00000000305	1.472	1.6	2.046	1.042	0.708	0.683	1.706	0.811	-1.07284	0.00141224	0.0102598	Cdh4	Down	cadherin 4 [Source:MGI Symbol;Acc:MGI:99218]
																ENSMUSG00000029228	4.821	5.218	6.796	2.891	2.227	2.893	5.61167	2.67033	-1.07141	0.000370497	0.00347955	Lnx1	Down	ligand of numb-protein X 1 [Source:MGI Symbol;Acc:MGI:1278335]
																ENSMUSG00000028626	10.745	13.447	11.051	5.335	4.137	7.306	11.7477	5.59267	-1.07077	3.91e-06	8.53e-05	Col9a2	Down	collagen, type IX, alpha 2 [Source:MGI Symbol;Acc:MGI:88466]
																ENSMUSG00000004366	29	15.01	27.527	11.5	10.796	11.79	23.8457	11.362	-1.06951	0.000685719	0.00570695	Sst	Down	somatostatin [Source:MGI Symbol;Acc:MGI:98326]
																ENSMUSG00000041930	8.986	8.905	10.532	3.835	4.38	5.344	9.47433	4.51967	-1.06781	1.46e-06	3.63e-05	Fam222a	Down	family with sequence similarity 222, member A [Source:MGI Symbol;Acc:MGI:3605543]
																ENSMUSG00000052613	1.338	1.62	2.204	0.93	0.808	0.725	1.72067	0.821	-1.06751	0.00142625	0.0103363	Pcdh15	Down	protocadherin 15 [Source:MGI Symbol;Acc:MGI:1891428]
																ENSMUSG00000009394	22.985	22.739	31.648	12.399	14.361	10.197	25.7907	12.319	-1.06596	6.64e-08	2.54e-06	Syn2	Down	synapsin II [Source:MGI Symbol;Acc:MGI:103020]
																ENSMUSG00000029361	3.446	3.516	4.591	1.837	1.735	1.953	3.851	1.84167	-1.06422	1.43e-08	6.63e-07	Nos1	Down	nitric oxide synthase 1, neuronal [Source:MGI Symbol;Acc:MGI:97360]
																ENSMUSG00000030518	1.36	2.079	1.84	0.818	1.008	0.699	1.75967	0.841667	-1.06398	0.00454637	0.025731	Entrep2	Down	endosomal transmembrane epsin interactor 2 [Source:MGI Symbol;Acc:MGI:1917888]
																ENSMUSG00000034570	9.689	7.003	10.08	3.961	4.587	4.26	8.924	4.26933	-1.06368	1.09e-05	0.000201234	Inpp5j	Down	inositol polyphosphate 5-phosphatase J [Source:MGI Symbol;Acc:MGI:2158663]
																ENSMUSG00000026347	17.623	15.131	18.295	9.594	8.052	6.819	17.0163	8.155	-1.06116	2.38e-07	7.83e-06	Tmem163	Down	transmembrane protein 163 [Source:MGI Symbol;Acc:MGI:1919410]
																ENSMUSG00000052949	26.459	33.005	37.314	17.13	14.99	14.272	32.2593	15.464	-1.0608	1.25e-10	1.09e-08	Rnf157	Down	ring finger protein 157 [Source:MGI Symbol;Acc:MGI:2442484]
																ENSMUSG00000026825	60.709	64.023	84.091	35.721	33.627	30.764	69.6077	33.3707	-1.06067	4.5e-12	5.84e-10	Dnm1	Down	dynamin 1 [Source:MGI Symbol;Acc:MGI:107384]
																ENSMUSG00000033768	39.615	35.775	48.971	19.385	21.316	18.938	41.4537	19.8797	-1.06021	9.42e-11	8.51e-09	Nrxn2	Down	neurexin II [Source:MGI Symbol;Acc:MGI:1096362]
																ENSMUSG00000025468	7.84	8.706	12.521	4.333	4.721	4.922	9.689	4.65867	-1.05643	0.00269721	0.0171943	Caly	Down	calcyon neuron-specific vesicular protein [Source:MGI Symbol;Acc:MGI:1915816]
																ENSMUSG00000121607	3.803	3.613	4.281	2.034	1.117	2.479	3.899	1.87667	-1.05493	0.00520013	0.0284923	Nlgn4l	Down	neuroligin 4-like [Source:MGI Symbol;Acc:MGI:3775191]
																ENSMUSG00000034730	18.3	19.697	24.275	10.468	10.092	9.46	20.7573	10.0067	-1.05266	2.36e-09	1.4e-07	Adgrb1	Down	adhesion G protein-coupled receptor B1 [Source:MGI Symbol;Acc:MGI:1933736]
																ENSMUSG00000053519	5.052	6.14	9.951	4.338	2.711	3.146	7.04767	3.39833	-1.05232	0.00370862	0.0220321	Kcnip1	Down	Kv channel-interacting protein 1 [Source:MGI Symbol;Acc:MGI:1917607]
																ENSMUSG00000030376	2.463	1.939	2.216	0.874	1.046	1.272	2.206	1.064	-1.05193	0.00181143	0.0124859	Slc8a2	Down	solute carrier family 8 (sodium/calcium exchanger), member 2 [Source:MGI Symbol;Acc:MGI:107996]
																ENSMUSG00000045625	23.38	10.019	22.318	10.326	8.475	8.097	18.5723	8.966	-1.05062	0.00207121	0.0139718	Pigz	Down	phosphatidylinositol glycan anchor biosynthesis, class Z [Source:MGI Symbol;Acc:MGI:2443822]
																ENSMUSG00000043629	3.904	4.494	5.63	2.832	2.332	1.612	4.676	2.25867	-1.0498	1.28e-06	3.28e-05	1700019D03Rik	Down	RIKEN cDNA 1700019D03 gene [Source:MGI Symbol;Acc:MGI:1914330]
																ENSMUSG00000033579	94.203	90.666	101.351	43.472	44.151	50.717	95.4067	46.1133	-1.04891	1.05e-17	5.25e-15	Fa2h	Down	fatty acid 2-hydroxylase [Source:MGI Symbol;Acc:MGI:2443327]
																ENSMUSG00000056306	2.762	2.223	2.762	1.703	1.194	0.852	2.58233	1.24967	-1.04713	0.00983461	0.0462534	Sertm1	Down	serine rich and transmembrane domain containing 1 [Source:MGI Symbol;Acc:MGI:3607715]
																ENSMUSG00000055733	5.147	8.18	8.404	4.461	3.337	2.72	7.24367	3.506	-1.04689	0.00033464	0.00321639	Nap1l3	Down	nucleosome assembly protein 1-like 3 [Source:MGI Symbol;Acc:MGI:1859565]
																ENSMUSG00000040164	5.425	6.606	8.345	3.862	2.831	3.176	6.792	3.28967	-1.0459	0.000119193	0.00140419	Kcns1	Down	K+ voltage-gated channel, subfamily S, 1 [Source:MGI Symbol;Acc:MGI:1197019]
																ENSMUSG00000021587	1.383	1.527	2.521	0.844	1.148	0.644	1.81033	0.878667	-1.04287	0.00996405	0.046704	Pcsk1	Down	proprotein convertase subtilisin/kexin type 1 [Source:MGI Symbol;Acc:MGI:97511]
																ENSMUSG00000004187	9.468	9.689	9.405	4.554	4.914	4.406	9.52067	4.62467	-1.04171	3.62e-07	1.11e-05	Kifc2	Down	kinesin family member C2 [Source:MGI Symbol;Acc:MGI:109187]
																ENSMUSG00000046709	14.917	16.333	17.421	8.763	8.377	6.523	16.2237	7.88767	-1.04043	9.69e-10	6.46e-08	Mapk10	Down	mitogen-activated protein kinase 10 [Source:MGI Symbol;Acc:MGI:1346863]
																ENSMUSG00000022577	8.467	7.818	13.61	4.075	4.205	6.256	9.965	4.84533	-1.04027	0.00670512	0.0347274	Ly6h	Down	lymphocyte antigen 6 family member H [Source:MGI Symbol;Acc:MGI:1346030]
																ENSMUSG00000078307	3.732	5.201	4.958	2.596	1.78	2.39	4.63033	2.25533	-1.03778	1.33e-05	0.000236336	AI593442	Down	expressed sequence AI593442 [Source:MGI Symbol;Acc:MGI:2143099]
																ENSMUSG00000027827	8.354	12.88	16.782	7.197	5.654	5.715	12.672	6.18867	-1.03394	2.43e-05	0.000393138	Kcnab1	Down	potassium voltage-gated channel, shaker-related subfamily, beta member 1 [Source:MGI Symbol;Acc:MGI:109155]
																ENSMUSG00000024049	1.42	1.134	1.255	0.575	0.831	0.455	1.26967	0.620333	-1.03333	0.00919976	0.0439893	Myom1	Down	myomesin 1 [Source:MGI Symbol;Acc:MGI:1341430]
																ENSMUSG00000036800	0.745	0.74	0.562	0.391	0.332	0.278	0.682333	0.333667	-1.03207	0.00395916	0.0230727	Fam135b	Down	family with sequence similarity 135, member B [Source:MGI Symbol;Acc:MGI:1917613]
																ENSMUSG00000042763	7.424	10.009	13.18	5.561	4.744	4.676	10.2043	4.99367	-1.03101	4.11e-05	0.000598778	Maneal	Down	mannosidase, endo-alpha-like [Source:MGI Symbol;Acc:MGI:2684896]
																ENSMUSG00000023903	1.497	0.903	1.791	0.796	0.627	0.628	1.397	0.683667	-1.03097	0.00644706	0.0336806	Mmp25	Down	matrix metallopeptidase 25 [Source:MGI Symbol;Acc:MGI:2443938]
																ENSMUSG00000015222	54.633	63.931	68.318	36.441	34.392	20.734	62.294	30.5223	-1.02923	1.31714e-08	6.25988e-07	Map2	Down	microtubule-associated protein 2 [Source:MGI Symbol;Acc:MGI:97175]
																ENSMUSG00000033676	7.099	10.141	9.892	5.045	4.45	3.801	9.044	4.432	-1.029	3.55e-07	1.09e-05	Gabrb3	Down	GABRB3, gamma-aminobutyric acid type A receptor subunit beta 3 [Source:MGI Symbol;Acc:MGI:95621]
																ENSMUSG00000061601	2.921	3.597	3.98	1.85	1.849	1.446	3.49933	1.715	-1.02887	2.61e-07	8.44e-06	Pclo	Down	piccolo (presynaptic cytomatrix protein) [Source:MGI Symbol;Acc:MGI:1349390]
																ENSMUSG00000033510	4.358	6.345	7.573	3.226	2.166	3.576	6.092	2.98933	-1.02709	0.000515112	0.00455356	Otud7a	Down	OTU domain containing 7A [Source:MGI Symbol;Acc:MGI:2158505]
																ENSMUSG00000025738	11.288	13.303	18.279	7.067	6.693	7.297	14.29	7.019	-1.02567	1.62e-07	5.57e-06	Fbxl16	Down	F-box and leucine-rich repeat protein 16 [Source:MGI Symbol;Acc:MGI:2448488]
																ENSMUSG00000061451	49.136	48.27	58.546	25.729	25.892	24.988	51.984	25.5363	-1.02552	3.19e-17	1.44e-14	Tmem151a	Down	transmembrane protein 151A [Source:MGI Symbol;Acc:MGI:2147713]
																ENSMUSG00000017639	34.556	29.132	29.252	16.218	14.213	15.234	30.98	15.2217	-1.02521	3.56e-12	4.84e-10	Rab11fip4	Down	RAB11 family interacting protein 4 (class II) [Source:MGI Symbol;Acc:MGI:2442920]
																ENSMUSG00000024862	29.585	34.652	42.312	19.134	16.44	16.78	35.5163	17.4513	-1.02515	2.68e-11	2.7e-09	Klc2	Down	kinesin light chain 2 [Source:MGI Symbol;Acc:MGI:107953]
																ENSMUSG00000039154	7.164	7.213	7.319	3.642	3.541	3.481	7.232	3.55467	-1.02468	0.00113632	0.0085866	Shd	Down	src homology 2 domain-containing transforming protein D [Source:MGI Symbol;Acc:MGI:1099461]
																ENSMUSG00000050272	3.739	5.819	5.737	2.722	2.408	2.393	5.09833	2.50767	-1.02368	0.000128937	0.00148698	Dscam	Down	DS cell adhesion molecule [Source:MGI Symbol;Acc:MGI:1196281]
																ENSMUSG00000040972	6.485	6.866	9.601	3.914	3.986	3.391	7.65067	3.76367	-1.02345	0.000427644	0.00391249	Igsf21	Down	immunoglobulin superfamily, member 21 [Source:MGI Symbol;Acc:MGI:2681842]
																ENSMUSG00000116165	10.183	10.096	14.576	5.803	5.625	5.757	11.6183	5.72833	-1.02022	3.03e-05	0.000475165	Pdxp	Down	pyridoxal (pyridoxine, vitamin B6) phosphatase [Source:MGI Symbol;Acc:MGI:1919282]
																ENSMUSG00000026204	36.637	25.578	39.023	18.602	15.745	15.578	33.746	16.6417	-1.01992	7.74e-08	2.89e-06	Ptprn	Down	protein tyrosine phosphatase receptor type N [Source:MGI Symbol;Acc:MGI:102765]
																ENSMUSG00000005716	28.988	27.323	32.949	18.446	15.396	10.189	29.7533	14.677	-1.01949	7.81e-05	0.00100594	Pvalb	Down	parvalbumin [Source:MGI Symbol;Acc:MGI:97821]
																ENSMUSG00000054752	4.151	5.813	6.633	2.904	3.248	2.037	5.53233	2.72967	-1.01916	0.000238772	0.00244319	Fsd1l	Down	fibronectin type III and SPRY domain containing 1-like [Source:MGI Symbol;Acc:MGI:2442443]
																ENSMUSG00000055430	63.608	83.762	96.133	47.225	36.678	36.636	81.1677	40.1797	-1.01444	2.53e-09	1.48e-07	Nap1l5	Down	nucleosome assembly protein 1-like 5 [Source:MGI Symbol;Acc:MGI:1923555]
																ENSMUSG00000053297	2.516	2.375	2.519	1.148	1.169	1.352	2.47	1.223	-1.01409	0.00254842	0.0165081	AI854703	Down	expressed sequence AI854703 [Source:MGI Symbol;Acc:MGI:2141510]
																ENSMUSG00000024697	4.774	7.043	10.263	4.647	3.774	2.528	7.36	3.64967	-1.01194	0.00228473	0.0151088	Gna14	Down	guanine nucleotide binding protein, alpha 14 [Source:MGI Symbol;Acc:MGI:95769]
																ENSMUSG00000043448	25.203	21.168	25.053	12.275	10.847	12.325	23.808	11.8157	-1.01075	1.4e-08	6.54e-07	Gjc2	Down	gap junction protein, gamma 2 [Source:MGI Symbol;Acc:MGI:2153060]
																ENSMUSG00000037989	9.1	7.542	8.042	4.252	4.373	3.633	8.228	4.086	-1.00985	2.99e-06	6.78e-05	Wnk2	Down	WNK lysine deficient protein kinase 2 [Source:MGI Symbol;Acc:MGI:1922857]
																ENSMUSG00000053024	56.747	51.862	61.908	29.536	27.233	27.928	56.839	28.2323	-1.00953	4.56e-15	1.35e-12	Cntn2	Down	contactin 2 [Source:MGI Symbol;Acc:MGI:104518]
																ENSMUSG00000053046	13.934	12.457	15.757	7.494	6.43	7.029	14.0493	6.98433	-1.00831	8.94e-09	4.48e-07	Brsk2	Down	BR serine/threonine kinase 2 [Source:MGI Symbol;Acc:MGI:1923020]
																ENSMUSG00000035681	1.981	2.296	2.745	1.201	1.249	1.044	2.34067	1.16467	-1.007	0.000598073	0.00511788	Kcnc2	Down	potassium voltage gated channel, Shaw-related subfamily, member 2 [Source:MGI Symbol;Acc:MGI:96668]
																ENSMUSG00000058153	8.621	8.155	8.513	4.683	4.16	3.746	8.42967	4.19633	-1.00635	5.71e-10	4.11e-08	Sez6l	Down	seizure related 6 homolog like [Source:MGI Symbol;Acc:MGI:1935121]
																ENSMUSG00000050751	10.466	9.1	10.51	5.473	4.219	5.296	10.0253	4.996	-1.0048	6.61e-06	0.000131876	Pgbd5	Down	piggyBac transposable element derived 5 [Source:MGI Symbol;Acc:MGI:2429955]
																ENSMUSG00000001864	12.884	12.036	19.184	6.3	7.357	8.325	14.7013	7.32733	-1.00459	1.48e-05	0.000259762	Aif1l	Down	allograft inflammatory factor 1-like [Source:MGI Symbol;Acc:MGI:1919598]
																ENSMUSG00000060882	3.972	4.505	4.745	1.969	2.613	2.019	4.40733	2.20033	-1.00218	3.76e-05	0.000560582	Kcnd2	Down	potassium voltage-gated channel, Shal-related family, member 2 [Source:MGI Symbol;Acc:MGI:102663]
																ENSMUSG00000021010	11.672	6.647	6.097	4.044	4.519	3.631	8.13867	4.06467	-1.00166	0.00376002	0.0222496	Npas3	Down	neuronal PAS domain protein 3 [Source:MGI Symbol;Acc:MGI:1351610]
																ENSMUSG00000028937	122.611	116.756	160.894	68.065	60.869	71.08	133.42	66.6713	-1.00084	2.6e-11	2.67e-09	Acot7	Down	acyl-CoA thioesterase 7 [Source:MGI Symbol;Acc:MGI:1917275]

## Sheet: ADU-S100+C176 vs. C176+ADU-S100
Supplementary Table 4.4. DEGs between the ADU-S100+C-176 and C-176+ADU-S100 treatment groups (|Fold Change| >= 2 and FDR < 0.05)
ADU-S100+C176-3d vs. C176+ADU-S100-3d																ADU-S100+C176-14d vs. C176+ADU-S100-14d
Id	C176+ADU-S100 treatment			ADU-S100+C176 treatment			Average		log2(FC)	PValue	FDR (Q value)	Symbol	Status	Description		Id	C176+ADU-S100 treatment			ADU-S100+C176 treatment			Average		log2(FC)	PValue	FDR (Q value)	Symbol	Status	Description
	S1-TPM	S2-TPM	S3-TPM	S1-TPM	S2-TPM	S3-TPM	C176+ADU-S100	ADU-S100+C176									S1-TPM	S2-TPM	S3-TPM	S1-TPM	S2-TPM	S3-TPM	C176+ADU-S100	ADU-S100+C176
ENSMUSG00000015441	0	0	0	0.657	0.556	3.291	0.001	1.50133	10.552	0.000135885	0.0321313	Gzmf	Up	granzyme F [Source:MGI Symbol;Acc:MGI:109254]		ENSMUSG00000094930	0	0	0	0.286	12.033	0.592	0.001	4.30367	12.0714	0.000762749	0.0138198	Igkv6-25	Up	immunoglobulin kappa chain variable 6-25 [Source:MGI Symbol;Acc:MGI:4439867]
ENSMUSG00000117819	0	0	0	0.311	0.454	0.238	0.001	0.334333	8.38514	2.40848e-05	0.00824836	Gm50253	Up	predicted gene, 50253 [Source:MGI Symbol;Acc:MGI:6303071]		ENSMUSG00000059256	0	0	0	4.621	1.262	1.635	0.001	2.506	11.2912	1.73566e-06	0.000177964	Gzmd	Up	granzyme D [Source:MGI Symbol;Acc:MGI:109255]
ENSMUSG00000079186	0	0.11	0	3.108	3.774	6.069	0.0366667	4.317	6.87942	6.26065e-07	0.000405847	Gzmc	Up	granzyme C [Source:MGI Symbol;Acc:MGI:109256]		ENSMUSG00000051207	0	0	0	0.173	3.825	0.072	0.001	1.35667	10.4059	0.00439865	0.0458303	Mrgprd	Up	MAS-related GPR, member D [Source:MGI Symbol;Acc:MGI:3033142]
ENSMUSG00000038276	0	0.062	0	2.69	0.221	2.824	0.0206667	1.91167	6.53138	1.53817e-05	0.0059403	Asic3	Up	acid-sensing ion channel 3 [Source:MGI Symbol;Acc:MGI:2159339]		ENSMUSG00000040284	0	0	0	1.793	0.743	1.362	0.001	1.29933	10.3436	0.000161616	0.00478414	Gzmg	Up	granzyme G [Source:MGI Symbol;Acc:MGI:109253]
ENSMUSG00000038580	0.221	0	0	1.634	4.235	4.914	0.0736667	3.59433	5.60857	0.000142172	0.0322571	Sct	Up	secretin [Source:MGI Symbol;Acc:MGI:99466]		ENSMUSG00000087303	0.05	0	0	0.05	2.565	0.103	0.0166667	0.906	5.76447	0.00206913	0.0275568	Lipo2	Up	lipase, member O2 [Source:MGI Symbol;Acc:MGI:3644466]
ENSMUSG00000068606	0	0.208	0.215	3.787	0.72	0.909	0.141	1.80533	3.6785	2.68682e-05	0.00903121	Gm4841	Up	predicted gene 4841 [Source:MGI Symbol;Acc:MGI:3643814]		ENSMUSG00000032318	0.071	0	0.06	0.567	4.321	0.294	0.0436667	1.72733	5.30587	0.000410072	0.00894819	Isl2	Up	insulin related protein 2 (islet 2) [Source:MGI Symbol;Acc:MGI:109156]
ENSMUSG00000025498	15.049	48.626	13.931	282.221	318.833	366.315	25.8687	322.456	3.63983	5.66035e-18	3.4247e-14	Irf7	Up	interferon regulatory factor 7 [Source:MGI Symbol;Acc:MGI:1859212]		ENSMUSG00000058126	1.215	1.207	1.253	40.699	103.344	0.393	1.225	48.1453	5.29654	0.000477255	0.00987676	Tpm3-rs7	Up	tropomyosin 3, related sequence 7 [Source:MGI Symbol;Acc:MGI:99705]
ENSMUSG00000056290	0.599	0.438	1.711	9.769	8.838	9.566	0.916	9.391	3.35786	6.72813e-15	3.05306e-11	Ms4a4b	Up	membrane-spanning 4-domains, subfamily A, member 4B [Source:MGI Symbol;Acc:MGI:1913083]		ENSMUSG00000022156	0	0.115	0	2.135	0.738	1.106	0.0383333	1.32633	5.1127	0.00123257	0.0192246	Gzme	Up	granzyme E [Source:MGI Symbol;Acc:MGI:109265]
ENSMUSG00000023132	1.653	3.144	1.042	14.676	14.988	26.506	1.94633	18.7233	3.26601	2.79097e-11	5.06589e-08	Gzma	Up	granzyme A [Source:MGI Symbol;Acc:MGI:109266]		ENSMUSG00000015441	0.237	0	0	4.611	0.588	1.96	0.079	2.38633	4.9168	0.000353341	0.00801055	Gzmf	Up	granzyme F [Source:MGI Symbol;Acc:MGI:109254]
ENSMUSG00000035042	7.765	8.894	10.705	68.579	84.37	102.66	9.12133	85.203	3.22359	6.32742e-21	5.74245e-17	Ccl5	Up	C-C motif chemokine ligand 5 [Source:MGI Symbol;Acc:MGI:98262]		ENSMUSG00000078249	0.388	0.522	0.358	13.587	13.29	1.941	0.422667	9.606	4.50634	0.00220779	0.0288483	Hmga1b	Up	high mobility group AT-hook 1B [Source:MGI Symbol;Acc:MGI:96161]
ENSMUSG00000037202	0.135	0.398	0.164	1.611	1.718	3.163	0.232333	2.164	3.21943	2.50414e-06	0.00122845	Prf1	Up	perforin 1 (pore forming protein) [Source:MGI Symbol;Acc:MGI:97551]		ENSMUSG00000054169	1.77	0.602	0.427	34.409	27.935	0.43	0.933	20.9247	4.48718	0.00260847	0.0318901	Ceacam10	Up	CEA cell adhesion molecule 10 [Source:MGI Symbol;Acc:MGI:1347248]
ENSMUSG00000034855	3.164	5.136	2.417	42.404	21.308	16.831	3.57233	26.8477	2.90986	6.98721e-13	2.11375e-09	Cxcl10	Up	C-X-C motif chemokine ligand 10 [Source:MGI Symbol;Acc:MGI:1352450]		ENSMUSG00000045027	0.165	0	0	2.79	0.816	0.085	0.055	1.23033	4.48347	0.00408969	0.0437738	Prss22	Up	serine protease 22 [Source:MGI Symbol;Acc:MGI:1918085]
ENSMUSG00000015437	0.466	2.059	1.346	10.684	6.835	10.468	1.29033	9.329	2.85398	1.51301e-08	1.5257e-05	Gzmb	Up	granzyme B [Source:MGI Symbol;Acc:MGI:109267]		ENSMUSG00000048349	0.049	0.047	0.101	0.171	1.885	0.355	0.0656667	0.803667	3.61336	0.000320436	0.00749039	Pou4f1	Up	POU domain, class 4, transcription factor 1 [Source:MGI Symbol;Acc:MGI:102525]
ENSMUSG00000067149	0.882	0.283	0.146	1.301	4.184	3.448	0.437	2.97767	2.76848	0.000175015	0.0382735	Jchain	Up	immunoglobulin joining chain [Source:MGI Symbol;Acc:MGI:96493]		ENSMUSG00000027071	0.332	0.298	0.123	0.349	7.532	0.599	0.251	2.82667	3.49334	0.00095309	0.0161497	P2rx3	Up	purinergic receptor P2X, ligand-gated ion channel, 3 [Source:MGI Symbol;Acc:MGI:1097160]
ENSMUSG00000028037	1.304	6.029	1.258	26.03	11.559	12.777	2.86367	16.7887	2.55155	7.87112e-07	0.000491022	Ifi44	Up	interferon-induced protein 44 [Source:MGI Symbol;Acc:MGI:2443016]		ENSMUSG00000027597	1.11	1.376	1.689	32.578	7.72	1.914	1.39167	14.0707	3.33781	0.00222136	0.0288789	Ahcy	Up	S-adenosylhomocysteine hydrolase [Source:MGI Symbol;Acc:MGI:87968]
ENSMUSG00000068246	1.942	2.485	2.814	20.348	11.08	9.758	2.41367	13.7287	2.50789	2.18431e-11	4.40528e-08	Apol9b	Up	apolipoprotein L 9b [Source:MGI Symbol;Acc:MGI:1919148]		ENSMUSG00000120166	0.117	0.189	0.361	2.09	3.099	0.208	0.222333	1.799	3.0164	0.00045733	0.00963106	Zfp33b	Up	zinc finger protein 33B [Source:MGI Symbol;Acc:MGI:1916873]
ENSMUSG00000073409	7.244	9.731	7.386	36.041	39.89	61.015	8.12033	45.6487	2.49096	3.45936e-14	1.25582e-10	H2-Q6	Up	histocompatibility 2, Q region locus 6 [Source:MGI Symbol;Acc:MGI:95935]		ENSMUSG00000005952	0.065	0.126	0.067	0.129	1.776	0.127	0.086	0.677333	2.97746	0.00320935	0.0367254	Trpv1	Up	transient receptor potential cation channel, subfamily V, member 1 [Source:MGI Symbol;Acc:MGI:1341787]
ENSMUSG00000105096	0.178	1.339	0.523	5.129	2.286	3.666	0.68	3.69367	2.44145	2.2401e-05	0.00785175	Gbp10	Up	guanylate-binding protein 10 [Source:MGI Symbol;Acc:MGI:4359647]		ENSMUSG00000070369	0.459	0.723	0.242	1.053	7.643	0.566	0.474667	3.08733	2.70137	0.0048808	0.0488242	Itgad	Up	integrin, alpha D [Source:MGI Symbol;Acc:MGI:3578624]
ENSMUSG00000079362	1.495	3.175	3.062	18.552	9.618	13.326	2.57733	13.832	2.42406	1.39271e-11	3.15988e-08	Gm43302	Up	predicted gene 43302 [Source:MGI Symbol;Acc:MGI:5663439]		ENSMUSG00000053693	3.247	2.504	2.227	14.873	16.686	17.736	2.65933	16.4317	2.62734	0.00302089	0.0389466	Mast1	Up	microtubule associated serine/threonine kinase 1 [Source:MGI Symbol;Acc:MGI:1861901]
ENSMUSG00000057346	0.193	2.88	0.904	9.573	6.833	4.137	1.32567	6.84767	2.36889	4.36303e-06	0.00208404	Apol9a	Up	apolipoprotein L 9a [Source:MGI Symbol;Acc:MGI:3606001]		ENSMUSG00000031285	0.323	0.382	0.304	2.573	1.599	2.054	0.336333	2.07533	2.62538	0.0020979	0.0149031	Dcx	Up	doublecortin [Source:MGI Symbol;Acc:MGI:1277171]
ENSMUSG00000058441	1.119	3.372	0.96	20.054	4.07	3.642	1.817	9.25533	2.34873	0.000221039	0.0450795	Panx2	Up	pannexin 2 [Source:MGI Symbol;Acc:MGI:1890615]		ENSMUSG00000022269	0.378	0.154	0.082	0.732	1.065	1.902	0.204667	1.233	2.59082	0.00437323	0.0456709	Marchf11	Up	membrane associated ring-CH-type finger 11 [Source:MGI Symbol;Acc:MGI:3608327]
ENSMUSG00000090231	6.567	21.64	13.455	46.742	65.058	90.09	13.8873	67.2967	2.27677	2.44963e-08	2.22316e-05	Cfb	Up	complement factor B [Source:MGI Symbol;Acc:MGI:105975]		ENSMUSG00000016529	0.078	0.08	0	0.249	0.363	0.334	0.0526667	0.315333	2.58192	0.000856733	0.00519488	Il10	Up	interleukin 10 [Source:MGI Symbol;Acc:MGI:96537]
ENSMUSG00000068227	0.447	0.823	0.937	2.679	2.487	4.972	0.735667	3.37933	2.19961	1.58421e-06	0.000798748	Il2rb	Up	interleukin 2 receptor, beta chain [Source:MGI Symbol;Acc:MGI:96550]		ENSMUSG00000022055	63.149	33.485	38.671	250.209	226.887	281.587	45.1017	252.894	2.48728	2.12881e-07	0.000125135	Nefl	Up	neurofilament, light polypeptide [Source:MGI Symbol;Acc:MGI:97313]
ENSMUSG00000030107	7.061	19.703	5.34	57.027	42.317	40.16	10.7013	46.5013	2.11948	3.58489e-07	0.000240998	Usp18	Up	ubiquitin specific peptidase 18 [Source:MGI Symbol;Acc:MGI:1344364]		ENSMUSG00000020396	47.227	21.517	29.32	178.911	169.856	197.621	32.688	182.129	2.47813	2.12079e-07	0.000124838	Nefh	Up	neurofilament, heavy polypeptide [Source:MGI Symbol;Acc:MGI:97309]
ENSMUSG00000000204	2.073	7.933	1.861	17.959	17.803	15.339	3.95567	17.0337	2.1064	5.92127e-06	0.00255897	Slfn4	Up	schlafen 4 [Source:MGI Symbol;Acc:MGI:1329010]		ENSMUSG00000074715	0.321	0.197	0.15	1.017	1.481	0.813	0.222667	1.10367	2.30935	8.57029e-05	0.00306864	Ccl28	Up	C-C motif chemokine ligand 28 [Source:MGI Symbol;Acc:MGI:1861731]
ENSMUSG00000060550	12.446	11.538	14.417	37.932	49.154	70.352	12.8003	52.4793	2.03557	9.83882e-10	1.2756e-06	H2-Q7	Up	histocompatibility 2, Q region locus 7 [Source:MGI Symbol;Acc:MGI:95936]		ENSMUSG00000062380	47.89	32.434	36.045	143.354	253.052	172.562	38.7897	189.656	2.28964	2.05673e-07	3.75658e-05	Tubb3	Up	tubulin, beta 3 class III [Source:MGI Symbol;Acc:MGI:107813]
ENSMUSG00000020396	12.104	54.468	8.606	199.269	50.533	57.281	25.0593	102.361	2.03025	0.000469491	0.0366114	Nefh	Up	neurofilament, heavy polypeptide [Source:MGI Symbol;Acc:MGI:97309]		ENSMUSG00000030669	8.895	5.235	6.147	21.536	63.388	13.815	6.759	32.913	2.28378	2.33356e-07	4.08848e-05	Calca	Up	calcitonin/calcitonin-related polypeptide, alpha [Source:MGI Symbol;Acc:MGI:2151253]
ENSMUSG00000079017	142.751	300.397	117.728	555.506	829.869	884.311	186.959	756.562	2.01674	4.26112e-08	3.51562e-05	Ifi27l2a	Up	interferon, alpha-inducible protein 27 like 2A [Source:MGI Symbol;Acc:MGI:1924183]		ENSMUSG00000069919	271.578	122.511	156.194	1011.04	1243.85	383.996	183.428	879.63	2.26169	4.59065e-05	0.00198664	Hba-a1	Up	hemoglobin alpha, adult chain 1 [Source:MGI Symbol;Acc:MGI:96015]
ENSMUSG00000079363	2.209	6.319	3.282	18.977	11.649	16.86	3.93667	15.8287	2.00749	9.56721e-08	7.2356e-05	Gbp4	Up	guanylate binding protein 4 [Source:MGI Symbol;Acc:MGI:97072]		ENSMUSG00000000214	0.242	0.337	0.551	0.72	3.177	1.516	0.376667	1.80433	2.26011	0.000905772	0.015582	Th	Up	tyrosine hydroxylase [Source:MGI Symbol;Acc:MGI:98735]
ENSMUSG00000069814	0.558	0.813	0.432	4.317	1.354	1.489	0.601	2.38667	1.98956	0.000197939	0.0412965	Ccdc92b	Up	coiled-coil domain containing 92B [Source:MGI Symbol;Acc:MGI:3588240]		ENSMUSG00000022054	44.133	23.946	32.034	178.108	124.747	175.301	33.371	159.385	2.25585	8.85226e-05	0.00314525	Nefm	Up	neurofilament, medium polypeptide [Source:MGI Symbol;Acc:MGI:97314]
ENSMUSG00000035692	16.04	58.61	14.755	128.197	117.078	101.603	29.8017	115.626	1.956	1.10967e-05	0.00457763	Isg15	Up	ISG15 ubiquitin-like modifier [Source:MGI Symbol;Acc:MGI:1855694]		ENSMUSG00000023484	7.064	3.113	5.205	13.569	43.869	14.895	5.12733	24.111	2.23341	6.98224e-09	2.68088e-06	Prph	Up	peripherin [Source:MGI Symbol;Acc:MGI:97774]
ENSMUSG00000041827	5.375	9.084	4.896	19.221	27.043	28.467	6.45167	24.9103	1.949	2.1846e-08	2.08698e-05	Oasl1	Up	2'-5' oligoadenylate synthetase-like 1 [Source:MGI Symbol;Acc:MGI:2180849]		ENSMUSG00000015222	43.441	34.392	30.734	117.209	144.898	160.523	36.189	140.877	1.96081	0.000440786	0.02349	Map2	Up	microtubule-associated protein 2 [Source:MGI Symbol;Acc:MGI:97175]
ENSMUSG00000022054	20.025	74.453	11.56	270.879	59.128	72.259	35.346	134.089	1.92357	0.000618736	0.0469751	Nefm	Up	neurofilament, medium polypeptide [Source:MGI Symbol;Acc:MGI:97314]		ENSMUSG00000030666	1.588	1.312	1.395	4.518	9.411	2.106	1.43167	5.345	1.90049	0.00207654	0.0276352	Calcb	Up	calcitonin-related polypeptide, beta [Source:MGI Symbol;Acc:MGI:2151254]
ENSMUSG00000066861	4.263	9.824	3.315	15.909	22.322	25.76	5.80067	21.3303	1.87862	5.24604e-06	0.00232246	Oas1g	Up	2'-5' oligoadenylate synthetase 1G [Source:MGI Symbol;Acc:MGI:97429]		ENSMUSG00000014301	3.551	3.277	3.937	10.159	10.118	19.066	3.58833	13.1143	1.86976	3.38626e-05	0.00160812	Pam16	Up	presequence translocase-asssociated motor 16 [Source:MGI Symbol;Acc:MGI:1913699]
ENSMUSG00000009185	5.025	12.346	8.557	16.076	30.013	46.999	8.64267	31.0293	1.84408	0.000136968	0.0321313	Ccl8	Up	C-C motif chemokine ligand 8 [Source:MGI Symbol;Acc:MGI:101878]		ENSMUSG00000021647	2.6	2.059	2.061	7.18	9.681	7.52	2.24	8.127	1.85922	4.58907e-07	6.37033e-05	Cartpt	Up	CART prepropeptide [Source:MGI Symbol;Acc:MGI:1351330]
ENSMUSG00000022055	29.794	102.454	18.353	353.535	74.934	112.119	50.2003	180.196	1.8438	0.000587732	0.0463159	Nefl	Up	neurofilament, light polypeptide [Source:MGI Symbol;Acc:MGI:97313]		ENSMUSG00000007944	0.88	0.513	0.501	2.086	1.78	2.922	0.631333	2.26267	1.84155	0.00070767	0.0130312	Ttc9b	Up	tetratricopeptide repeat domain 9B [Source:MGI Symbol;Acc:MGI:1920282]
ENSMUSG00000028268	8.181	18.909	8.772	65.493	27.262	32.712	11.954	41.8223	1.80678	5.02575e-06	0.00228056	Gbp3	Up	guanylate binding protein 3 [Source:MGI Symbol;Acc:MGI:1926263]		ENSMUSG00000044349	2.028	2.26	1.45	7.337	3.848	8.388	1.91267	6.52433	1.77025	5.34978e-07	6.96013e-05	Snhg11	Up	small nucleolar RNA host gene 11 [Source:MGI Symbol;Acc:MGI:2441845]
ENSMUSG00000044703	1.072	2.526	1.483	6.147	5.768	5.773	1.69367	5.896	1.79959	0.000236338	0.0476642	Phf11a	Up	PHD finger protein 11A [Source:MGI Symbol;Acc:MGI:1918441]		ENSMUSG00000020268	0.647	0.521	0.815	1.891	3.951	0.886	0.661	2.24267	1.76249	0.00268796	0.0325549	Lyrm7	Up	LYR motif containing 7 [Source:MGI Symbol;Acc:MGI:1922780]
ENSMUSG00000105504	2.485	6.992	3.139	26.45	7.133	10.049	4.20533	14.544	1.79013	0.000186766	0.0398821	Gbp5	Up	guanylate binding protein 5 [Source:MGI Symbol;Acc:MGI:2429943]		ENSMUSG00000025270	4.383	1.952	2.563	7.728	17.277	3.647	2.966	9.55067	1.68708	0.000755251	0.0137115	Alas2	Up	aminolevulinic acid synthase 2, erythroid [Source:MGI Symbol;Acc:MGI:87990]
ENSMUSG00000037979	7.765	13.783	5.839	55.329	16.226	20.736	9.129	30.7637	1.7527	2.24941e-05	0.00785175	Ccdc92	Up	coiled-coil domain containing 92 [Source:MGI Symbol;Acc:MGI:106485]		ENSMUSG00000028963	10.747	5.67	5.405	34.331	16.576	15.273	7.274	22.06	1.60061	0.000567998	0.0112638	Uts2	Up	urotensin 2 [Source:MGI Symbol;Acc:MGI:1346329]
ENSMUSG00000029757	3.677	9.43	3.553	32.069	10.337	12.373	5.55333	18.2597	1.71723	0.000194728	0.0410989	Dync1i1	Up	dynein cytoplasmic 1 intermediate chain 1 [Source:MGI Symbol;Acc:MGI:107743]		ENSMUSG00000079598	3.202	2.573	1.876	5.77	7.743	7.001	2.55033	6.838	1.42289	8.89656e-05	0.00314799	Clec2l	Up	C-type lectin domain family 2, member L [Source:MGI Symbol;Acc:MGI:2141402]
ENSMUSG00000035929	27.725	36.683	30.664	98.537	88.492	109.888	31.6907	98.9723	1.64297	9.13874e-10	1.2756e-06	H2-Q4	Up	histocompatibility 2, Q region locus 4 [Source:MGI Symbol;Acc:MGI:95933]		ENSMUSG00000026285	2.822	2.666	2.72	6.52	9.996	4.717	2.736	7.07767	1.37121	6.13273e-05	0.00247034	Pdcd1	Up	programmed cell death 1 [Source:MGI Symbol;Acc:MGI:104879]
ENSMUSG00000024371	5.599	9.318	11.675	16.97	32.17	33.143	8.864	27.4277	1.6296	1.31041e-05	0.00528563	C2	Up	complement C2 [Source:MGI Symbol;Acc:MGI:88226]		ENSMUSG00000068129	53.884	30.724	34.711	129.694	119.911	49.888	39.773	99.831	1.3277	0.000116845	0.00381991	Cst7	Up	cystatin F (leukocystatin) [Source:MGI Symbol;Acc:MGI:1298217]
ENSMUSG00000026535	47.697	55.007	43.446	182.599	114.052	154.365	48.7167	150.339	1.62573	3.52045e-10	5.80906e-07	Ifi202b	Up	interferon activated gene 202B [Source:MGI Symbol;Acc:MGI:1347083]		ENSMUSG00000062329	2.8	2.052	3.445	7.697	6.659	5.778	2.76567	6.71133	1.27897	0.00229861	0.0294398	Cytl1	Up	cytokine-like 1 [Source:MGI Symbol;Acc:MGI:2684993]
ENSMUSG00000029561	18.234	57.386	19.906	111.347	82.469	90.467	31.842	94.761	1.57336	0.000138077	0.0321313	Oasl2	Up	2'-5' oligoadenylate synthetase-like 2 [Source:MGI Symbol;Acc:MGI:1344390]		ENSMUSG00000022595	11.271	13.943	17.224	42.358	35.822	22.6	14.146	33.5933	1.24778	0.000260949	0.0065495	Lypd2	Up	Ly6/Plaur domain containing 2 [Source:MGI Symbol;Acc:MGI:1915561]
ENSMUSG00000061232	325.111	319.066	313.438	732.311	1010.42	1059.42	319.205	934.049	1.54902	7.88926e-09	8.42341e-06	H2-K1	Up	histocompatibility 2, K1, K region [Source:MGI Symbol;Acc:MGI:95904]		ENSMUSG00000036815	1.279	1.138	1.109	1.25	4.594	2.464	1.17533	2.76933	1.23647	0.00501608	0.0498054	Dpp10	Up	dipeptidylpeptidase 10 [Source:MGI Symbol;Acc:MGI:2442409]
ENSMUSG00000027514	24.617	55.901	24.595	87.844	100.507	118.886	35.0377	102.412	1.54741	2.77742e-05	0.00909668	Zbp1	Up	Z-DNA binding protein 1 [Source:MGI Symbol;Acc:MGI:1927449]		ENSMUSG00000010505	1.031	0.76	1.462	2.535	3.016	2.095	1.08433	2.54867	1.23293	0.00317203	0.0364056	Myt1	Up	myelin transcription factor 1 [Source:MGI Symbol;Acc:MGI:1100535]
ENSMUSG00000040483	29.057	49.766	19.38	100.836	93.797	87.398	32.7343	94.0103	1.52201	6.22514e-05	0.0176551	Xaf1	Up	XIAP associated factor 1 [Source:MGI Symbol;Acc:MGI:3772572]		ENSMUSG00000023064	42.383	33.21	40.827	80.466	123.387	68.435	38.8067	90.7627	1.22579	1.63982e-08	4.96828e-06	Sncg	Up	synuclein, gamma [Source:MGI Symbol;Acc:MGI:1298397]
ENSMUSG00000010154	2.393	3.874	2.378	11.43	5.88	7.51	2.88167	8.27333	1.52157	7.40519e-05	0.0200614	Spire2	Up	spire type actin nucleation factor 2 [Source:MGI Symbol;Acc:MGI:2446256]		ENSMUSG00000040856	2.374	5.594	1.965	8.895	4.748	9.543	3.311	7.72867	1.22295	0.00455174	0.0469643	Dlk1	Up	delta like non-canonical Notch ligand 1 [Source:MGI Symbol;Acc:MGI:94900]
ENSMUSG00000078922	4.608	12.133	5.944	26.631	16.699	21.533	7.56167	21.621	1.51566	6.90768e-05	0.0192894	Tgtp1	Up	T cell specific GTPase 1 [Source:MGI Symbol;Acc:MGI:98734]		ENSMUSG00000021194	9.212	7.988	6.89	11.713	16.433	27.259	8.03	18.4683	1.20158	0.000378718	0.00838571	Chga	Up	chromogranin A [Source:MGI Symbol;Acc:MGI:88394]
ENSMUSG00000030110	12.519	23.88	9.061	62.439	25.138	40.793	15.1533	42.79	1.49764	9.15326e-05	0.0234001	Ret	Up	ret proto-oncogene [Source:MGI Symbol;Acc:MGI:97902]		ENSMUSG00000022212	6.258	3.665	4.305	5.788	14.467	12.427	4.74267	10.894	1.19976	0.000714117	0.0131098	Cpne6	Up	copine VI [Source:MGI Symbol;Acc:MGI:1334445]
ENSMUSG00000040253	3.835	7.452	4.83	21.72	11.449	12.057	5.37233	15.0753	1.48857	1.20078e-06	0.000660464	Gbp7	Up	guanylate binding protein 7 [Source:MGI Symbol;Acc:MGI:2444421]		ENSMUSG00000000308	15.823	12.181	11.047	18.039	30.66	40.778	13.017	29.8257	1.19616	0.000165197	0.00484739	Ckmt1	Up	creatine kinase, mitochondrial 1, ubiquitous [Source:MGI Symbol;Acc:MGI:99441]
ENSMUSG00000075602	193.103	237.24	195.786	552.805	587.123	602.061	208.71	580.663	1.4762	2.07711e-09	2.35635e-06	Ly6a	Up	lymphocyte antigen 6 family member A [Source:MGI Symbol;Acc:MGI:107527]		ENSMUSG00000054459	19.351	14.979	16.809	23.398	36.426	55.019	17.0463	38.281	1.16717	0.000203933	0.00555078	Vsnl1	Up	visinin-like 1 [Source:MGI Symbol;Acc:MGI:1349453]
ENSMUSG00000078853	9.871	20.438	11.568	53.946	30.319	32.03	13.959	38.765	1.47356	1.88739e-05	0.00699144	Igtp	Up	interferon gamma induced GTPase [Source:MGI Symbol;Acc:MGI:107729]		ENSMUSG00000004366	11.5	10.796	11.79	24.563	15.742	36.22	11.362	25.5083	1.16675	0.00160892	0.0231721	Sst	Up	somatostatin [Source:MGI Symbol;Acc:MGI:98326]
ENSMUSG00000046718	104.878	155.2	111.966	279.291	340.681	393.311	124.015	337.761	1.44549	8.11562e-07	0.000491022	Bst2	Up	bone marrow stromal cell antigen 2 [Source:MGI Symbol;Acc:MGI:1916800]		ENSMUSG00000034891	13.566	10.454	11.673	13.269	24.258	41.745	11.8977	26.424	1.15117	0.00459053	0.0471556	Sncb	Up	synuclein, beta [Source:MGI Symbol;Acc:MGI:1889011]
ENSMUSG00000037872	22.277	29.01	18.341	67.325	66.122	55.939	23.2093	63.1287	1.44359	1.75622e-07	0.000122605	Ackr1	Up	atypical chemokine receptor 1 (Duffy blood group) [Source:MGI Symbol;Acc:MGI:1097689]		ENSMUSG00000054850	1.413	1.407	1.729	2.497	3.84	3.575	1.51633	3.304	1.12363	0.00289768	0.034267	Smim10l2a	Up	small integral membrane protein 10 like 2A [Source:MGI Symbol;Acc:MGI:2443645]
ENSMUSG00000057596	2.461	2.855	2.3	9.797	4.448	6.399	2.53867	6.88133	1.43862	4.85494e-05	0.0149053	Trim30d	Up	tripartite motif-containing 30D [Source:MGI Symbol;Acc:MGI:3035181]		ENSMUSG00000003657	10.749	7.718	9.77	12.351	17.28	31.464	9.41233	20.365	1.11347	0.00225056	0.0291346	Calb2	Up	calbindin 2 [Source:MGI Symbol;Acc:MGI:101914]
ENSMUSG00000002847	6.165	6.042	8.603	11.077	22.116	22.44	6.93667	18.5443	1.41866	8.4568e-05	0.0219285	Pla1a	Up	phospholipase A1 member A [Source:MGI Symbol;Acc:MGI:1934677]		ENSMUSG00000071658	11.963	10.345	13.462	20.955	25.02	31.32	11.9233	25.765	1.11162	3.76331e-06	0.000305913	Gng3	Up	guanine nucleotide binding protein (G protein), gamma 3 [Source:MGI Symbol;Acc:MGI:102704]
ENSMUSG00000056116	11.165	14.044	13.739	23.173	24.981	55.206	12.9827	34.4533	1.40806	0.000141944	0.0322571	H2-T22	Up	histocompatibility 2, T region locus 22 [Source:MGI Symbol;Acc:MGI:95956]		ENSMUSG00000073433	5.18	4.383	4.985	7.475	12.831	11.017	4.84933	10.441	1.1064	0.00115354	0.0183407	Arhgdig	Up	Rho GDP dissociation inhibitor gamma [Source:MGI Symbol;Acc:MGI:108430]
ENSMUSG00000048424	2.296	2.097	4.64	7.94	6.502	8.79	3.011	7.744	1.36284	0.000168993	0.0374072	Ranbp3l	Up	RAN binding protein 3-like [Source:MGI Symbol;Acc:MGI:2444654]		ENSMUSG00000007021	6.662	5.514	5.123	8.404	13.615	15.065	5.76633	12.3613	1.10011	0.000197574	0.00544338	Syngr3	Up	synaptogyrin 3 [Source:MGI Symbol;Acc:MGI:1341881]
ENSMUSG00000047735	6.577	8.932	8.777	25.295	16.42	20.327	8.09533	20.6807	1.35312	8.51709e-07	0.000494337	Samd9l	Up	sterile alpha motif domain containing 9-like [Source:MGI Symbol;Acc:MGI:1343184]		ENSMUSG00000027581	43.215	35.371	36.134	59.393	82.192	104.337	38.24	81.974	1.10008	5.0132e-06	0.000386616	Stmn3	Up	stathmin-like 3 [Source:MGI Symbol;Acc:MGI:1277137]
ENSMUSG00000037224	2.123	2.676	1.532	7.617	3.26	5.243	2.11033	5.37333	1.34835	8.41e-05	0.0219285	Zfyve28	Up	zinc finger, FYVE domain containing 28 [Source:MGI Symbol;Acc:MGI:2684992]		ENSMUSG00000030731	3.122	1.603	3.196	3.964	5.655	7.332	2.64033	5.65033	1.09762	0.00262418	0.0319757	Syt3	Up	synaptotagmin III [Source:MGI Symbol;Acc:MGI:99665]
ENSMUSG00000030235	7.171	10.712	8.071	36.606	14.75	14.035	8.65133	21.797	1.33314	0.000239398	0.0477507	Slco1c1	Up	solute carrier organic anion transporter family, member 1c1 [Source:MGI Symbol;Acc:MGI:1889679]		ENSMUSG00000090071	2.962	2.593	2.677	2.834	8.014	6.756	2.744	5.868	1.09659	0.00498874	0.0496563	Cdk5r2	Up	cyclin dependent kinase 5, regulatory subunit 2 [Source:MGI Symbol;Acc:MGI:1330828]
ENSMUSG00000030683	36.427	41.92	26.552	131.93	75.379	51.009	34.9663	86.106	1.30015	2.80654e-05	0.00909668	Sez6l2	Up	seizure related 6 homolog like 2 [Source:MGI Symbol;Acc:MGI:2385295]		ENSMUSG00000075289	9.992	8.76	10.944	25.494	14.613	22.773	9.89867	20.96	1.08233	0.000404759	0.00884296	Carns1	Up	carnosine synthase 1 [Source:MGI Symbol;Acc:MGI:2147595]
ENSMUSG00000062380	71.72	126.961	53.406	290.83	118.116	202.375	84.029	203.774	1.27801	0.000473794	0.0422675	Tubb3	Up	tubulin, beta 3 class III [Source:MGI Symbol;Acc:MGI:107813]		ENSMUSG00000018865	18.773	12.448	12.57	15.563	36.487	39.901	14.597	30.6503	1.07023	0.00135574	0.0205595	Sult4a1	Up	sulfotransferase family 4A, member 1 [Source:MGI Symbol;Acc:MGI:1888971]
ENSMUSG00000029298	4.855	10.688	3.969	17.048	12.299	17.096	6.504	15.481	1.2511	0.00014866	0.0333128	Gbp9	Up	guanylate-binding protein 9 [Source:MGI Symbol;Acc:MGI:3605620]		ENSMUSG00000023328	8.334	6.544	7.322	9.855	12.259	24.234	7.4	15.4493	1.06195	0.00335479	0.0380759	Ache	Up	acetylcholinesterase [Source:MGI Symbol;Acc:MGI:87876]
ENSMUSG00000052776	31.39	54.56	24.475	77.592	82.4	100.474	36.8083	86.822	1.23803	0.000182054	0.0393388	Oas1a	Up	2'-5' oligoadenylate synthetase 1A [Source:MGI Symbol;Acc:MGI:2180860]		ENSMUSG00000029608	9.979	6.868	7.435	7.882	22.232	20.017	8.094	16.7103	1.04582	0.00248173	0.0308778	Rph3a	Up	rabphilin 3A [Source:MGI Symbol;Acc:MGI:102788]
ENSMUSG00000036814	8.418	9.282	11.129	19.014	22.079	25.394	9.60967	22.1623	1.20555	3.64795e-05	0.0116165	Slc6a20a	Up	solute carrier family 6 (neurotransmitter transporter), member 20A [Source:MGI Symbol;Acc:MGI:2143217]		ENSMUSG00000044628	9.916	8.838	9.159	16.239	14.496	26.73	9.30433	19.155	1.04175	0.000881184	0.015305	Rnf208	Up	ring finger protein 208 [Source:MGI Symbol;Acc:MGI:1916096]
ENSMUSG00000005338	24.701	35.574	20.305	86.746	54.427	43.92	26.86	61.6977	1.19976	6.0411e-05	0.0176012	Cadm3	Up	cell adhesion molecule 3 [Source:MGI Symbol;Acc:MGI:2137858]		ENSMUSG00000022132	13.197	10.762	11.537	27.133	15.552	29.621	11.832	24.102	1.02646	0.00222993	0.0289164	Cldn10	Up	claudin 10 [Source:MGI Symbol;Acc:MGI:1913101]
ENSMUSG00000025408	29.876	31.77	26.349	79.405	58.74	54.233	29.3317	64.126	1.12845	4.67728e-06	0.00217685	Ddit3	Up	DNA-damage inducible transcript 3 [Source:MGI Symbol;Acc:MGI:109247]		ENSMUSG00000024524	3.572	3.163	3.346	4.117	9.725	6.515	3.36033	6.78567	1.01389	0.000372923	0.00831291	Gnal	Up	guanine nucleotide binding protein, alpha stimulating, olfactory type [Source:MGI Symbol;Acc:MGI:95774]
ENSMUSG00000022587	299.736	455.433	333.413	637.314	815.489	909.308	362.861	787.37	1.11763	0.000109987	0.026978	Ly6e	Up	lymphocyte antigen 6 family member E [Source:MGI Symbol;Acc:MGI:106651]		ENSMUSG00000078763	6.906	8.352	5.64	2.798	4.784	2.838	6.966	3.47333	-1.00401	9.06982e-05	0.00319676	Slfn1	Down	schlafen 1 [Source:MGI Symbol;Acc:MGI:1313259]
ENSMUSG00000037321	15.623	22.261	18.369	37.658	42.384	41.808	18.751	40.6167	1.1151	4.76543e-05	0.0149053	Tap1	Up	transporter 1, ATP-binding cassette, sub-family B (MDR/TAP) [Source:MGI Symbol;Acc:MGI:98483]		ENSMUSG00000036086	11.444	9.66	11.776	3.219	5.369	7.754	10.96	5.44733	-1.00863	3.68808e-05	0.00171093	Zranb3	Down	zinc finger, RAN-binding domain containing 3 [Source:MGI Symbol;Acc:MGI:1918362]
ENSMUSG00000025492	478.36	579.215	491.671	798.434	1231.14	1244.35	516.415	1091.31	1.07945	0.000136302	0.0321313	Ifitm3	Up	interferon induced transmembrane protein 3 [Source:MGI Symbol;Acc:MGI:1913391]		ENSMUSG00000102543	10.249	11.4	11.848	3.038	7.566	6.026	11.1657	5.54333	-1.01024	0.00119965	0.0188579	Pcdhgc5	Down	protocadherin gamma subfamily C, 5 [Source:MGI Symbol;Acc:MGI:1935205]
ENSMUSG00000073411	997.186	950.81	969.674	1589.57	2110.05	2301.59	972.557	2000.41	1.04044	6.10917e-05	0.0176012	H2-D1	Up	histocompatibility 2, D region locus 1 [Source:MGI Symbol;Acc:MGI:95896]		ENSMUSG00000009418	33.926	37.971	33.232	8.706	29.792	13.561	35.043	17.353	-1.01394	7.0618e-06	0.000499754	Nav1	Down	neuron navigator 1 [Source:MGI Symbol;Acc:MGI:2183683]
ENSMUSG00000021665	1117.56	1486.59	967.295	560.28	606.052	577.777	1190.48	581.37	-1.03402	0.000102142	0.0257496	Hexb	Down	hexosaminidase B [Source:MGI Symbol;Acc:MGI:96074]		ENSMUSG00000054199	27.647	33.417	25.749	11.117	17.498	14.169	28.9377	14.2613	-1.02084	3.15534e-07	5.01514e-05	Gon4l	Down	gon-4 like [Source:MGI Symbol;Acc:MGI:1917579]
ENSMUSG00000025701	8.509	9.539	7.21	3.597	3.298	3.719	8.41933	3.538	-1.25077	4.92711e-05	0.0149053	Alox5	Down	arachidonate 5-lipoxygenase [Source:MGI Symbol;Acc:MGI:87999]		ENSMUSG00000062202	36.453	34.825	47.869	11.681	27.293	19.681	39.7157	19.5517	-1.02242	4.37493e-06	0.00034476	Btbd9	Down	BTB domain containing 9 [Source:MGI Symbol;Acc:MGI:1916625]
ENSMUSG00000036905	902.393	939.778	933.473	372.638	402.958	385.477	925.215	387.024	-1.25736	1.05192e-07	7.63738e-05	C1qb	Down	complement component 1, q subcomponent, beta polypeptide [Source:MGI Symbol;Acc:MGI:88224]		ENSMUSG00000026012	8.909	6.679	11.475	3.024	6.279	3.832	9.021	4.37833	-1.04291	1.97675e-06	0.000190761	Cd28	Down	CD28 antigen [Source:MGI Symbol;Acc:MGI:88327]
ENSMUSG00000064267	45.246	35.053	48.701	12.268	22.238	19.132	43	17.8793	-1.26604	0.000105128	0.0261393	Hvcn1	Down	hydrogen voltage-gated channel 1 [Source:MGI Symbol;Acc:MGI:1921346]		ENSMUSG00000027322	76.415	75.234	66.376	18.618	57.56	29.304	72.675	35.1607	-1.0475	2.25436e-06	0.000208627	Siglec1	Down	sialic acid binding Ig-like lectin 1, sialoadhesin [Source:MGI Symbol;Acc:MGI:99668]
ENSMUSG00000036896	1189.58	1213.58	1184.15	476	523.964	483.642	1195.77	494.535	-1.27379	4.8587e-08	3.83436e-05	C1qc	Down	complement component 1, q subcomponent, C chain [Source:MGI Symbol;Acc:MGI:88225]		ENSMUSG00000045362	5.478	6.774	6.66	3.087	3.001	3.014	6.304	3.034	-1.05505	3.52284e-07	5.24794e-05	Tnfrsf26	Down	tumor necrosis factor receptor superfamily, member 26 [Source:MGI Symbol;Acc:MGI:2651928]
ENSMUSG00000015568	33.201	34.742	19.388	12.961	9.977	12.928	29.1103	11.9553	-1.28388	5.22545e-05	0.0155487	Lpl	Down	lipoprotein lipase [Source:MGI Symbol;Acc:MGI:96820]		ENSMUSG00000105096	9.469	17.039	11.203	4.165	10.736	3.199	12.5703	6.03333	-1.059	0.000311976	0.00732109	Gbp10	Down	guanylate-binding protein 10 [Source:MGI Symbol;Acc:MGI:4359647]
ENSMUSG00000036887	1317.94	1375.45	1375.51	571.861	579.541	476.224	1356.3	542.542	-1.32187	1.52751e-09	1.84839e-06	C1qa	Down	complement component 1, q subcomponent, alpha polypeptide [Source:MGI Symbol;Acc:MGI:88223]		ENSMUSG00000002847	33.657	38.899	45.895	17.007	21.288	18.475	39.4837	18.9233	-1.06109	2.48574e-13	3.66489e-10	Pla1a	Down	phospholipase A1 member A [Source:MGI Symbol;Acc:MGI:1934677]
ENSMUSG00000040152	184.229	247.018	218.221	67.531	82.871	106.122	216.489	85.508	-1.34016	1.35712e-05	0.00535502	Thbs1	Down	thrombospondin 1 [Source:MGI Symbol;Acc:MGI:98737]		ENSMUSG00000029380	62.389	43.818	90.253	31.466	30.484	31.654	65.4867	31.2013	-1.06959	1.23862e-06	0.000139701	Cxcl1	Down	C-X-C motif chemokine ligand 1 [Source:MGI Symbol;Acc:MGI:108068]
ENSMUSG00000026938	26.408	22.526	26.941	5.275	8.706	9.322	25.2917	7.76767	-1.70311	1.5748e-06	0.000798748	Fcna	Down	ficolin A [Source:MGI Symbol;Acc:MGI:1340905]		ENSMUSG00000070323	8.272	7.475	11.498	3.256	5.223	4.238	9.08167	4.239	-1.09923	7.69021e-06	0.000537897	Mmp27	Down	matrix metallopeptidase 27 [Source:MGI Symbol;Acc:MGI:3039232]
ENSMUSG00000069515	7.256	8.517	6.851	1.627	2.432	2.045	7.54133	2.03467	-1.89003	1.99921e-05	0.00725755	Lyz1	Down	lysozyme 1 [Source:MGI Symbol;Acc:MGI:96902]		ENSMUSG00000027360	5.427	4.178	4.536	2.226	1.808	2.541	4.71367	2.19167	-1.10482	7.87084e-05	0.00291612	Hdc	Down	histidine decarboxylase [Source:MGI Symbol;Acc:MGI:96062]
ENSMUSG00000035183	10.547	13.366	5.612	3.256	1.37	3.219	9.84167	2.615	-1.91209	1.60646e-05	0.00607478	Slc24a5	Down	solute carrier family 24, member 5 [Source:MGI Symbol;Acc:MGI:2677271]		ENSMUSG00000032122	71.266	50.18	77.527	18.05	38.905	35.23	66.3243	30.7283	-1.10997	3.9014e-09	1.63732e-06	Slc37a2	Down	solute carrier family 37 (glycerol-3-phosphate transporter), member 2 [Source:MGI Symbol;Acc:MGI:1929693]
ENSMUSG00000026725	1.085	3.39	5.24	0.436	0.773	0.655	3.23833	0.621333	-2.38181	7.10735e-06	0.00300013	Tnn	Down	tenascin N [Source:MGI Symbol;Acc:MGI:2665790]		ENSMUSG00000043740	19.477	10.504	21.395	3.387	10.071	10.305	17.1253	7.921	-1.11238	5.63689e-05	0.00231716	Trem6l	Down	triggering receptor expressed on myeloid cells-like 6 [Source:MGI Symbol;Acc:MGI:2443478]
ENSMUSG00000026390	33.968	14.645	32.586	2.448	5.271	6.192	27.0663	4.637	-2.54524	9.56999e-10	1.2756e-06	Marco	Down	macrophage receptor with collagenous structure [Source:MGI Symbol;Acc:MGI:1309998]		ENSMUSG00000047686	2.998	3.746	2.542	1.327	1.513	1.451	3.09533	1.43033	-1.11374	0.000127545	0.0040651	Rtl3	Down	retrotransposon Gag like 3 [Source:MGI Symbol;Acc:MGI:2685221]
ENSMUSG00000047562	7.002	28.736	9.39	1.754	2.137	3.771	15.0427	2.554	-2.55823	1.53875e-06	0.000798748	Mmp10	Down	matrix metallopeptidase 10 [Source:MGI Symbol;Acc:MGI:97007]		ENSMUSG00000090231	53.044	56.867	71.793	20.938	34.344	27.418	60.568	27.5667	-1.13563	8.0653e-12	9.09665e-09	Cfb	Down	complement factor B [Source:MGI Symbol;Acc:MGI:105975]
ENSMUSG00000015854	67.338	128.346	53.095	11.452	20.238	8.345	82.9263	13.345	-2.63553	3.05947e-12	7.93321e-09	Cd5l	Down	CD5 antigen-like [Source:MGI Symbol;Acc:MGI:1334419]		ENSMUSG00000031779	5.514	5.174	4.593	2.893	1.89	2.133	5.09367	2.30533	-1.14373	8.29411e-05	0.00299351	Ccl22	Down	C-C motif chemokine ligand 22 [Source:MGI Symbol;Acc:MGI:1306779]
ENSMUSG00000050578	13.073	56.311	16.854	3.525	4.093	6.123	28.746	4.58033	-2.64984	3.96707e-08	3.42887e-05	Mmp13	Down	matrix metallopeptidase 13 [Source:MGI Symbol;Acc:MGI:1340026]		ENSMUSG00000056116	117.414	172.326	120.155	42.614	62.419	78.215	136.632	61.0827	-1.16146	3.36678e-08	8.93483e-06	H2-T22	Down	histocompatibility 2, T region locus 22 [Source:MGI Symbol;Acc:MGI:95956]
ENSMUSG00000044206	4.288	6.47	5.468	0.422	1.285	0.745	5.40867	0.817333	-2.72628	8.7151e-07	0.000494337	Vsig4	Down	V-set and immunoglobulin domain containing 4 [Source:MGI Symbol;Acc:MGI:2679720]		ENSMUSG00000029695	2.46	3.979	4.684	0.91	2.191	1.855	3.70767	1.652	-1.1663	0.000826564	0.0146237	Aass	Down	aminoadipate-semialdehyde synthase [Source:MGI Symbol;Acc:MGI:1353573]
ENSMUSG00000018362	24.968	86.201	27.476	2.2	1.059	1.496	46.215	1.585	-4.86581	4.17432e-27	7.57681e-23	Kpna2	Down	karyopherin subunit alpha 2 [Source:MGI Symbol;Acc:MGI:103561]		ENSMUSG00000021125	20.642	23.642	17.408	5.491	11.094	10.416	20.564	9.00033	-1.19207	3.16816e-07	5.01514e-05	Arg2	Down	arginase type II [Source:MGI Symbol;Acc:MGI:1330806]
																ENSMUSG00000036523	1.786	3.105	1.881	0.876	1.481	0.595	2.25733	0.984	-1.19789	0.000638843	0.0121481	Greb1	Down	gene regulated by estrogen in breast cancer protein [Source:MGI Symbol;Acc:MGI:2149712]
																ENSMUSG00000020681	68.827	66.107	58.253	17.856	44.389	20.982	64.3957	27.7423	-1.21487	4.22666e-07	5.95894e-05	Ace	Down	angiotensin I converting enzyme [Source:MGI Symbol;Acc:MGI:87874]
																ENSMUSG00000024678	26.535	28.434	24.469	6.822	14.021	13.019	26.4793	11.2873	-1.23016	8.11607e-09	2.98903e-06	Ms4a4d	Down	membrane-spanning 4-domains, subfamily A, member 4D [Source:MGI Symbol;Acc:MGI:1913857]
																ENSMUSG00000026180	5.301	4.075	6.352	1.676	2.44	2.587	5.24267	2.23433	-1.23046	1.14119e-06	0.000129522	Cxcr2	Down	C-X-C motif chemokine receptor 2 [Source:MGI Symbol;Acc:MGI:105303]
																ENSMUSG00000017737	4.192	7.289	4.861	1.54	3.958	1.418	5.44733	2.30533	-1.24057	8.6109e-05	0.00307708	Mmp9	Down	matrix metallopeptidase 9 [Source:MGI Symbol;Acc:MGI:97011]
																ENSMUSG00000030433	4.498	6.321	8.485	1.705	3.881	2.567	6.43467	2.71767	-1.2435	0.000139664	0.00430835	Sbk2	Down	SH3-binding domain kinase family, member 2 [Source:MGI Symbol;Acc:MGI:2685925]
																ENSMUSG00000027171	3.437	1.904	3.157	0.567	2.213	0.784	2.83267	1.188	-1.25363	0.00471506	0.0477902	Prrg4	Down	proline rich Gla (G-carboxyglutamic acid) 4 (transmembrane) [Source:MGI Symbol;Acc:MGI:2442211]
																ENSMUSG00000035459	5.184	3.405	4.683	0.91	3.108	1.544	4.424	1.854	-1.25471	4.78858e-05	0.00205261	Stab2	Down	stabilin 2 [Source:MGI Symbol;Acc:MGI:2178743]
																ENSMUSG00000062524	4.506	3.595	3.287	1.381	2.295	1.077	3.796	1.58433	-1.2606	0.000632047	0.0120443	Ncr1	Down	natural cytotoxicity triggering receptor 1 [Source:MGI Symbol;Acc:MGI:1336212]
																ENSMUSG00000051506	26.411	26.647	23.796	5.772	16.443	9.772	25.618	10.6623	-1.26463	0.000449801	0.00953831	Wdfy4	Down	WD repeat and FYVE domain containing 4 [Source:MGI Symbol;Acc:MGI:3584510]
																ENSMUSG00000026580	3.577	6.303	3.058	1.146	2.122	2.03	4.31267	1.766	-1.28809	0.000170059	0.00494184	Selp	Down	selectin, platelet [Source:MGI Symbol;Acc:MGI:98280]
																ENSMUSG00000038508	9.539	14.851	19.238	7.054	5.063	5.563	14.5427	5.89333	-1.30314	1.63009e-06	0.000171026	Gdf15	Down	growth differentiation factor 15 [Source:MGI Symbol;Acc:MGI:1346047]
																ENSMUSG00000026581	4.035	3.376	5.39	1.237	2.574	1.355	4.267	1.722	-1.30914	4.25767e-06	0.000336991	Sell	Down	selectin, lymphocyte [Source:MGI Symbol;Acc:MGI:98279]
																ENSMUSG00000002944	126.061	85.456	135.969	25.791	40.828	71.661	115.829	46.0933	-1.32936	0.0031135	0.0359017	Cd36	Down	CD36 molecule [Source:MGI Symbol;Acc:MGI:107899]
																ENSMUSG00000022534	1.789	2.102	3.411	0.571	1.834	0.498	2.434	0.967667	-1.33075	0.00237879	0.0300404	Mefv	Down	Mediterranean fever [Source:MGI Symbol;Acc:MGI:1859396]
																ENSMUSG00000035042	119.348	95.696	138.548	37.373	50.036	48.664	117.864	45.3577	-1.3777	5.75247e-16	2.07618e-12	Ccl5	Down	C-C motif chemokine ligand 5 [Source:MGI Symbol;Acc:MGI:98262]
																ENSMUSG00000029371	25.282	11.554	29.471	9.037	9.266	6.432	22.1023	8.245	-1.42261	8.03116e-07	9.72687e-05	Cxcl5	Down	C-X-C motif chemokine ligand 5 [Source:MGI Symbol;Acc:MGI:1096868]
																ENSMUSG00000091345	13.122	8.827	14.076	2.129	7.56	3.526	12.0083	4.405	-1.44682	1.08835e-07	2.33815e-05	Col6a5	Down	collagen, type VI, alpha 5 [Source:MGI Symbol;Acc:MGI:3648134]
																ENSMUSG00000047592	1.351	1.866	1.802	0.767	0.36	0.702	1.673	0.609667	-1.45634	0.00221991	0.0288789	Nxpe5	Down	neurexophilin and PC-esterase domain family, member 5 [Source:MGI Symbol;Acc:MGI:3584036]
																ENSMUSG00000104876	0.96	0.789	0.868	0.141	0.315	0.495	0.872333	0.317	-1.4604	0.00440675	0.0458882	Trdc	Down	T cell receptor delta, constant region [Source:MGI Symbol;Acc:MGI:98612]
																ENSMUSG00000009185	101.196	130.505	126.293	32.531	60.554	36.125	119.331	43.07	-1.47022	4.74191e-15	1.22246e-11	Ccl8	Down	C-C motif chemokine ligand 8 [Source:MGI Symbol;Acc:MGI:101878]
																ENSMUSG00000068227	5.272	7.881	6.579	1.425	3.871	1.558	6.57733	2.28467	-1.52552	2.2692e-07	4.0147e-05	Il2rb	Down	interleukin 2 receptor, beta chain [Source:MGI Symbol;Acc:MGI:96550]
																ENSMUSG00000028610	3.301	5.292	4.934	1.637	0.611	2.223	4.509	1.49033	-1.59717	0.000171204	0.00495915	Dmrtb1	Down	DMRT-like family B with proline-rich C-terminal, 1 [Source:MGI Symbol;Acc:MGI:1927125]
																ENSMUSG00000043263	5.021	10.785	5.549	1.826	1.98	3.183	7.11833	2.32967	-1.61142	2.30051e-06	0.000209672	Ifi209	Down	interferon activated gene 209 [Source:MGI Symbol;Acc:MGI:2138243]
																ENSMUSG00000043719	6.767	7.732	7.808	1.052	3.406	2.692	7.43567	2.38333	-1.64148	4.58957e-10	2.67172e-07	Col6a6	Down	collagen, type VI, alpha 6 [Source:MGI Symbol;Acc:MGI:2444259]
																ENSMUSG00000038580	8.608	6.019	4.634	2.787	1.6	1.778	6.42033	2.055	-1.64351	0.00227271	0.0292326	Sct	Down	secretin [Source:MGI Symbol;Acc:MGI:99466]
																ENSMUSG00000026073	3.844	2.924	5.281	0.847	1.083	1.864	4.01633	1.26467	-1.66712	2.14739e-05	0.00114651	Il1r2	Down	interleukin 1 receptor, type II [Source:MGI Symbol;Acc:MGI:96546]
																ENSMUSG00000067212	229.118	344.838	235.042	64.958	82.433	107.203	269.666	84.8647	-1.66794	3.16391e-14	7.13699e-11	H2-T23	Down	histocompatibility 2, T region locus 23 [Source:MGI Symbol;Acc:MGI:95957]
																ENSMUSG00000043931	1.547	1.741	2.909	0.771	0.639	0.532	2.06567	0.647333	-1.67403	0.00371968	0.0408803	Gimap7	Down	GTPase, IMAP family member 7 [Source:MGI Symbol;Acc:MGI:1349657]
																ENSMUSG00000079017	314.561	320.33	347.862	119.442	134.831	48.136	327.584	100.803	-1.70033	1.53186e-11	1.4979e-08	Ifi27l2a	Down	interferon, alpha-inducible protein 27 like 2A [Source:MGI Symbol;Acc:MGI:1924183]
																ENSMUSG00000033508	3.526	1.972	3.181	1.124	0.699	0.8	2.893	0.874333	-1.72631	0.000257063	0.00649987	Asprv1	Down	aspartic peptidase, retroviral-like 1 [Source:MGI Symbol;Acc:MGI:1915105]
																ENSMUSG00000027398	27.756	13.265	28.457	4.567	9.467	6.392	23.1593	6.80867	-1.76615	6.58571e-10	3.60139e-07	Il1b	Down	interleukin 1 beta [Source:MGI Symbol;Acc:MGI:96543]
																ENSMUSG00000089989	3.537	3.694	1.652	0.424	1.065	1.12	2.961	0.869667	-1.76755	0.000596703	0.0116451	Gm45713	Down	predicted gene 45713 [Source:MGI Symbol;Acc:MGI:5804828]
																ENSMUSG00000047562	2.282	1.162	2.859	0.505	0.942	0.394	2.101	0.613667	-1.77555	0.000809422	0.014447	Mmp10	Down	matrix metallopeptidase 10 [Source:MGI Symbol;Acc:MGI:97007]
																ENSMUSG00000053835	49.901	65.55	52.977	8.823	23.348	16.718	56.1427	16.2963	-1.78455	3.67462e-15	1.1052e-11	H2-T24	Down	histocompatibility 2, T region locus 24 [Source:MGI Symbol;Acc:MGI:95958]
																ENSMUSG00000023132	8.449	13.178	16.943	2.435	4.617	4.102	12.8567	3.718	-1.78992	1.71667e-07	3.29564e-05	Gzma	Down	granzyme A [Source:MGI Symbol;Acc:MGI:109266]
																ENSMUSG00000066363	5.527	6.647	5.053	1.353	0.9	2.334	5.74233	1.529	-1.90905	2.21083e-07	3.95016e-05	Serpina3f	Down	serine (or cysteine) peptidase inhibitor, clade A, member 3F [Source:MGI Symbol;Acc:MGI:2182838]
																ENSMUSG00000043613	384.163	239.924	489.371	73.96	136.848	72.436	371.153	94.4147	-1.97493	6.87597e-19	4.13613e-15	Mmp3	Down	matrix metallopeptidase 3 [Source:MGI Symbol;Acc:MGI:97010]
																ENSMUSG00000069609	69.467	77.996	68.839	6.293	18.659	28.866	72.1007	17.9393	-2.00689	0.000214067	0.0057819	Cd300ld4	Down	CD300 molecule like family member D4 [Source:MGI Symbol;Acc:MGI:3702658]
																ENSMUSG00000015437	5.242	8.131	10.281	1.286	3.011	1.568	7.88467	1.955	-2.01188	1.63202e-08	4.96828e-06	Gzmb	Down	granzyme B [Source:MGI Symbol;Acc:MGI:109267]
[truncated: 11 more rows]
