# Supplementary material for: Sequential Modulation of the cGAS-STING Pathway Promotes Spinal Cord Injury Repair
Source: Research Square preprint supplement (doi:10.21203/rs.3.rs-8596952/v1), 2026-01-22
Supplement: Supplementary file 4 [file 962ed5acb5cf313cb059f85d.xlsx]

## Sheet: DEGs post-SCI
Supplementary Table 2. Differentially expressed genes from pairwise comparisons of sham, 3-day, and 14-day post-SCI spinal cord samples
DEGs between sham and 3 day post-SCI									DEGs between sham and 14 day post-SCI									DEGs between 3 day and 14 day post-SCI
Symbol	Sham_count	SCI-3D_count	Sham_rpkm	SCI-3D_rpkm	log2 FC	PValue	FDR	significant	Symbol	Sham_count	SCI-14D_count	Sham_rpkm	SCI-14D_rpkm	log2 FC	PValue	FDR	significant	Symbol	SCI-3D_count	SCI-14D_count	SCI-3D_rpkm	SCI-14D_rpkm	log2 FC	PValue	FDR	significant
Itgb2	182.333	7084.67	8.24467	281.202	5.092	0	0	yes	Gpnmb	319	57915.7	12.495	1936.44	7.27591	0	0	yes	Arg1	19374.3	143.667	1494.3	11.3887	-7.03572	0	0	yes
Eno2	17385.3	963.333	970.788	43.8927	-4.4671	0	0	yes	Tyrobp	295.667	7699	66.691	1511.22	4.50208	6.92647e-282	6.27435e-278	yes	Agt	72.3333	5294	4.328	327.621	6.24218	2.42578e-278	2.19969e-274	yes
Slc12a5	8512.67	104.333	200.919	2.22933	-6.49386	0	0	yes	Cd68	195.667	9984.67	21.4813	946.817	5.46193	2.97995e-281	1.79959e-277	yes	Slc39a12	58	1973.33	2.482	88.8303	5.16148	2.68272e-214	1.62179e-210	yes
Cd68	195.667	15044.7	21.4813	1393.54	6.01953	0	0	yes	Ctsd	10922	202328	690.953	11130.4	4.00977	1.41708e-276	6.41831e-273	yes	Aqp4	1124.67	30494	26.6487	745.814	4.80668	4.85773e-206	2.2025e-202	yes
Arg1	61	19374.3	5.53633	1494.3	8.07632	0	0	yes	Lgals3	107.667	6587.67	12.8933	670.932	5.70147	7.16623e-260	2.59661e-256	yes	Aldoc	927.667	9389.67	54.2707	571.461	3.39641	5.33328e-202	1.93449e-198	yes
Plek	364	13061.7	11.9873	363.839	4.92372	0	0	yes	Itgax	47	4372.33	1.57867	127.379	6.33428	1.69791e-253	5.12684e-250	yes	Fmod	437.333	10797.7	16.097	405.228	4.65387	1.01594e-188	3.07086e-185	yes
Msr1	41.6667	7964.33	2.235	353.807	7.30654	0	0	yes	Mpeg1	623	29430.7	19.3203	792.879	5.35891	5.47427e-234	1.41682e-230	yes	C3	726.667	27461.7	18.5327	693.221	5.22517	1.80695e-187	4.68156e-184	yes
Adam8	37.6667	8318.33	1.629	304.661	7.54707	0	0	yes	C1qa	891.333	22633.7	115.185	2538.91	4.46219	2.42761e-225	5.49762e-222	yes	A2m	999.667	8381	24.802	213.131	3.10321	1.91918e-181	4.35078e-178	yes
Gusb	347.333	8058	22.407	351.664	3.97218	0	0	yes	Fcrl2	48.3333	4189.67	3.74767	260.862	6.12115	6.33019e-217	1.27427e-213	yes	Apoc1	171.667	3574.33	45.236	972.64	4.42636	2.43261e-174	4.90198e-171	yes
Syt2	9386.67	69	388.402	2.05667	-7.5611	0	0	yes	Ctsz	844	13632.7	78.744	1106.7	3.81294	3.98154e-213	7.21336e-210	yes	Ntsr2	25.3333	1506	2.058	127.279	5.95061	3.44312e-162	6.24445e-159	yes
Atp1b1	29311.3	809.333	1528.41	36.3207	-5.3951	0	0	yes	Cd84	72.6667	3603	3.692	165.32	5.48471	1.99406e-211	3.28422e-208	yes	Slc1a2	1369.33	15658.7	15.377	159.389	3.3737	5.76552e-162	9.50578e-159	yes
Dnm1	15832	512.667	676.965	16.6003	-5.3498	0	0	yes	C1qc	598	18704.7	66.8143	1811.66	4.76101	2.04043e-206	3.08054e-203	yes	Ttyh1	556.667	4830.67	23.2377	203.532	3.13072	1.11057e-157	1.67844e-154	yes
Snap25	29122.7	389.333	1853.23	21.156	-6.45283	0	0	yes	Apobec1	83.6667	2941.33	5.388	164.716	4.93409	2.62882e-201	3.66357e-198	yes	Ndrg2	1079	8349	65.3563	531.017	3.02236	1.73424e-146	2.41939e-143	yes
Plin2	470.333	22395.3	35.6563	1417.46	5.31301	0	0	yes	Hexb	2980.33	29464.7	210.371	1812.75	3.10717	2.03919e-195	2.63885e-192	yes	Abat	477	3732.67	12.1213	94.796	2.96728	2.1528e-146	2.7888e-143	yes
Spp1	2585	335784	248.089	27249.7	6.77924	0	0	yes	Gusb	347.333	5381.33	22.407	243.43	3.44148	1.01992e-194	1.23185e-191	yes	Rrm2	1652	147	86.3823	8.24867	-3.3885	5.1801e-139	6.26308e-136	yes
Gpnmb	319	86015.7	12.495	2860.78	7.83891	0	0	yes	Itgb2	182.333	4976.67	8.24467	198.625	4.59044	1.71788e-191	1.94518e-188	yes	Prc1	1561.67	130	64.6413	5.145	-3.65121	8.12945e-138	9.21474e-135	yes
Atp2b2	8118.67	128	226.44	2.548	-6.47362	0	0	yes	C3ar1	80.6667	2954.33	2.53133	80.2417	4.98638	1.17796e-189	1.25536e-186	yes	Ccna2	1596.33	152.333	61.8837	6.11967	-3.33803	2.05606e-137	2.19345e-134	yes
Stx1b	10168.3	242.667	300.476	6.116	-5.61852	0	0	yes	C1qb	550	15163	67.8143	1624.27	4.58206	1.42903e-187	1.43832e-184	yes	Gfap	17117.7	120685	742.817	5345.09	2.84714	1.95312e-132	1.96787e-129	yes
Ndrg4	21652	637	1005.33	28.2557	-5.15298	0	0	yes	Plau	77.6667	2587.33	4.48833	129.757	4.85349	9.21785e-181	8.78946e-178	yes	Igfbp2	399	5161	36.7173	486.05	3.72657	5.3154e-132	5.07369e-129	yes
Dzank1	4335	93.3333	85.157	1.55633	-5.7739	0	0	yes	Apoe	25537	482364	2449.46	40467.6	4.04623	7.05448e-180	6.3903e-177	yes	Ccnb1	1395.33	128	65.8403	6.14133	-3.42235	1.19644e-130	1.08493e-127	yes
C3ar1	80.6667	5983.33	2.53133	158.708	5.97034	0	0	yes	Lyz2	1789.33	133715	185.333	11884.4	6.00281	5.42814e-178	4.68294e-175	yes	Hmox1	40235.3	1716.33	2892.06	128.001	-4.49786	9.43875e-130	8.15148e-127	yes
Cd53	185.333	7001.33	14.341	459.074	5.00051	0	0	yes	Grn	966	16473.7	56.099	831.89	3.89035	1.27308e-176	1.04838e-173	yes	Mlc1	245	5886.67	9.91233	247.791	4.64375	1.23508e-126	1.01815e-123	yes
Mpeg1	623	34712.3	19.3203	914.543	5.56486	0	0	yes	Snap25	29122.7	1985.33	1853.23	111.45	-4.05558	2.32657e-173	1.83263e-170	yes	Top2a	3010.67	339.333	66.1773	7.64633	-3.1135	1.31271e-124	1.0351e-121	yes
Lgals3	107.667	16064	12.8933	1580.43	6.93755	0	0	yes	Slc12a5	8512.67	679.333	200.919	13.2207	-3.92575	9.99452e-168	7.54461e-165	yes	Cyp2d22	252	1867	10.8723	79.272	2.86615	1.34699e-116	1.01787e-113	yes
Nap1l5	7525.33	302	563.714	18.8523	-4.90215	0	0	yes	Ctss	2069	35685.7	204.406	3078.83	3.91287	1.40573e-162	1.0187e-159	yes	Id4	179.667	2341.67	5.31033	71.4793	3.75065	1.85465e-116	1.34543e-113	yes
Spock2	18646.7	764.667	477.999	16.737	-4.83589	0	0	yes	Vsnl1	8865.67	583	625.363	36.425	-4.10169	3.10451e-158	2.16325e-155	yes	Mki67	2617	324.667	29.934	3.79133	-2.98101	6.91345e-116	4.82239e-113	yes
Scn1a	5088.33	39.3333	82.4137	0.637667	-7.01394	0	0	yes	Slc11a1	57.6667	2334	3.391	117.807	5.11857	6.89827e-156	4.62874e-153	yes	Adcyap1r1	275	2242	5.96333	44.8677	2.91149	1.92497e-112	1.29301e-109	yes
Camta1	4621.33	193.333	103.044	5.644	-4.19039	1.16721e-307	7.53975e-305	yes	Apoc1	49.3333	3574.33	14.8877	972.64	6.02972	3.62128e-154	2.3431e-151	yes	Ntrk2	1167.33	6543.67	27.648	135.184	2.28968	2.27861e-110	1.47589e-107	yes
Tspyl4	10916	623	377.647	18.342	-4.36382	6.34957e-306	3.96016e-303	yes	Trem2	182.667	4899	22.5927	532.139	4.55788	5.30416e-152	3.31364e-149	yes	Igsf1	14	1002.33	0.602	41.3333	6.1014	1.84735e-109	1.15529e-106	yes
Scn8a	5464.33	125	67.0723	3.09033	-4.43988	4.02378e-302	2.42594e-299	yes	Ckmt1	6513	562.333	539.655	41.068	-3.71595	5.60362e-152	3.38402e-149	yes	Gjb6	283	2373.33	15.45	133.204	3.10796	4.85858e-109	2.93718e-106	yes
Adgre1	124.667	4609.33	5.65	184.274	5.02746	2.01316e-300	1.17458e-297	yes	Nckap1l	328.667	4822.67	9.44067	119.317	3.65976	2.28526e-150	1.33555e-147	yes	Adra2a	106.667	1250	3.27267	39.9553	3.60985	1.17248e-108	6.85937e-106	yes
Syn1	6764.33	264	280.712	9.32033	-4.91257	3.79173e-299	2.14316e-296	yes	Man2b1	736	11248.7	26.45	351.875	3.73372	6.99279e-149	3.95901e-146	yes	Tpx2	1445.33	187.667	44.8917	5.89767	-2.92823	5.39275e-107	3.05634e-104	yes
Ctsd	10922	240233	690.953	12846.1	4.21659	1.41378e-296	7.74878e-294	yes	Hvcn1	60.3333	1673.33	3.262	76.131	4.54466	1.55145e-148	8.51744e-146	yes	Scg3	547	5064.33	28.8637	271.923	3.23587	2.64219e-105	1.45209e-102	yes
Ckmt1	6513	94.3333	539.655	6.743	-6.3225	2.40918e-295	1.28161e-292	yes	Ftl1	5023.67	59669	697.794	7203.48	3.36782	2.62524e-148	1.39887e-145	yes	C4b	2878.67	16689	61.3613	365.444	2.57425	4.393e-104	2.34328e-101	yes
Clstn3	6812	178.333	227.733	5.367	-5.40709	6.68231e-293	3.45323e-290	yes	Cd53	185.333	3331.67	14.341	224.01	3.96535	6.37144e-148	3.29804e-145	yes	Ptgds	2945.67	43307.7	420.959	6297.85	3.90311	1.64313e-103	8.51425e-101	yes
Syp	12422	416	644.875	18.3057	-5.13866	1.44181e-290	7.24389e-288	yes	Faim2	13823.7	1593.67	412.783	41.6093	-3.3104	6.63932e-148	3.34124e-145	yes	Atp1b2	2508	20705	100.135	851.767	3.08851	1.07846e-99	5.43305e-97	yes
Slc17a6	3427.67	87.6667	111.612	2.415	-5.53032	2.46478e-290	1.20488e-287	yes	Cd300c2	49.3333	1938.33	5.499	188.593	5.09997	3.97003e-146	1.94392e-143	yes	Acta2	4540	624.333	272.922	39.0487	-2.80514	1.82781e-98	8.95923e-96	yes
Syn2	4128	174.333	158.931	5.83967	-4.76637	7.3812e-290	3.51326e-287	yes	Hexa	1025.33	11692.7	69.2003	685.04	3.30734	3.18275e-143	1.51742e-140	yes	Sparcl1	6228.33	30526.3	260.425	1312.18	2.33303	3.34662e-97	1.59722e-94	yes
Dpp6	5065.67	218.333	153.573	5.545	-4.79159	1.60587e-288	7.44751e-286	yes	Capg	120	2731.33	12.9477	256.833	4.31007	6.31142e-142	2.9319e-139	yes	Slc6a11	107	1355.33	2.92767	38.4913	3.71671	1.20897e-96	5.62204e-94	yes
Vamp1	18935.3	255.333	911.944	11.4617	-6.31406	5.34961e-285	2.41896e-282	yes	Scn1a	5088.33	330.333	82.4137	4.80567	-4.10008	1.89305e-141	8.57411e-139	yes	Ube2c	990	84.3333	116.626	10.2317	-3.51078	4.23421e-95	1.91979e-92	yes
Pacsin1	5293.33	123	195.199	4.23233	-5.52735	1.30208e-279	5.7441e-277	yes	Rasgrf1	7951.67	757	265.047	22.5197	-3.55699	9.62457e-138	4.25289e-135	yes	Slc6a1	336	1934.33	8.904	52.7297	2.56609	2.38589e-94	1.05538e-91	yes
Faim2	13823.7	371.333	412.783	9.362	-5.46242	3.18276e-279	1.37063e-276	yes	Grin1	4595	457.667	158.492	13.7463	-3.52729	9.80146e-136	4.22793e-133	yes	Birc5	768.333	63.3333	89.265	7.51333	-3.57057	3.26751e-94	1.41094e-91	yes
Lcp1	707	12069	29.6043	378.438	3.67618	7.79092e-279	3.27708e-276	yes	Plek	364	4633	11.9873	133.237	3.47441	2.05702e-135	8.66676e-133	yes	F13a1	6113.33	335.667	176.735	9.96233	-4.14896	7.47066e-94	3.15088e-91	yes
Eef1a2	13440.7	625.667	863.451	34.2347	-4.65658	2.61988e-275	1.07695e-272	yes	Iqsec3	3842.33	368	72.3797	6.15533	-3.55568	3.0055e-135	1.23751e-132	yes	Kif20a	1094	95.3333	38.33	3.57433	-3.42273	1.09239e-93	4.50262e-91	yes
Cntnap1	3867.67	122.667	95.482	2.58567	-5.20662	9.67357e-275	3.88813e-272	yes	Dzank1	4335	493.333	85.157	8.46833	-3.32998	5.40533e-134	2.17619e-131	yes	Gpr37l1	1035.67	6018.33	51.9427	311.667	2.58501	4.04874e-91	1.63173e-88	yes
Apobec1	83.6667	3192.33	5.388	175.177	5.02292	1.76346e-274	6.93384e-272	yes	Disp2	10543	1429.33	216.102	25.4303	-3.08709	1.1487e-133	4.52414e-131	yes	Fxyd1	204	2045.33	46.4487	466.832	3.32919	1.64424e-90	6.48258e-88	yes
Slc6a11	9526.33	107	307.998	2.92767	-6.71702	3.61677e-274	1.39184e-271	yes	Syt2	9386.67	713.667	388.402	23.8267	-4.0269	1.82704e-133	7.04266e-131	yes	Sel1l3	230.667	1954.67	5.79433	50.786	3.13172	4.77004e-89	1.84063e-86	yes
Unc80	4069	66.6667	58.6177	0.729333	-6.32861	8.13089e-274	3.06382e-271	yes	Cyba	93	2628.33	16.8393	413.455	4.61782	3.55813e-133	1.34297e-130	yes	Slc25a18	61.3333	940.667	3.62733	57.8737	3.99593	5.02815e-89	1.8998e-86	yes
Rab3a	7450.67	293.667	723.928	24.6057	-4.87878	1.74357e-273	6.4359e-271	yes	Atf3	28	1138.33	1.908	67.5103	5.14498	4.09562e-133	1.51429e-130	yes	Pclaf	892	73.6667	46.8023	3.951	-3.56629	1.98883e-88	7.3611e-86	yes
Gprasp1	8356.33	645.333	217.458	13.4613	-4.01385	1.48296e-272	5.36448e-270	yes	Spp1	2585	35433.7	248.089	2954.74	3.5741	1.10238e-132	3.99435e-130	yes	Slc4a4	731	4660	11.4857	78.393	2.77089	5.99906e-88	2.17598e-85	yes
Scn4b	5847.67	61	156.764	1.41333	-6.79335	3.6748e-272	1.30326e-269	yes	Stx1b	10168.3	1195.33	300.476	31.2417	-3.2657	8.12194e-131	2.8852e-128	yes	Clec3b	32	920	3.69067	108.752	4.88102	9.76893e-88	3.47391e-85	yes
Hal	26	6628.67	0.896667	199.013	7.79407	5.22685e-272	1.81804e-269	yes	Laptm5	731.667	11563.7	39.4053	581.436	3.88316	1.31516e-128	4.58205e-126	yes	Psd2	64.6667	748	1.62833	19.298	3.56698	6.15308e-86	2.146e-83	yes
Chga	3671.67	68.6667	261.608	4.143	-5.98059	3.24112e-271	1.10608e-268	yes	Tlr2	89.3333	1653	3.99	64.2187	4.00853	2.86856e-127	9.80561e-125	yes	Fam107a	184	1507.33	7.525	62.762	3.06013	1.46377e-84	5.00885e-82	yes
Napb	4613	131	140.407	3.42433	-5.35765	1.70238e-269	5.70203e-267	yes	Abca1	592.667	15751.7	7.81633	179.581	4.522	3.39182e-126	1.13795e-123	yes	Vtn	1207	9139	79.199	612.069	2.95014	1.55973e-84	5.23838e-82	yes
Grn	966	21605.7	56.099	1066.17	4.24832	3.00323e-267	9.87625e-265	yes	Lpl	103	2990	3.92767	100.261	4.67395	1.01734e-124	3.35112e-122	yes	Cdk1	1477.33	227.333	129.67	20.983	-2.62756	1.9848e-84	6.5448e-82	yes
Hmox1	243	40235.3	20.864	2892.06	7.11494	3.78026e-267	1.22096e-264	yes	Ctsa	2058.33	19075.7	132.431	1123.88	3.08518	9.92587e-124	3.2112e-121	yes	Cabp7	46.3333	766.667	2.013	34.32	4.09163	2.48759e-84	8.05625e-82	yes
Cd84	72.6667	4330.33	3.692	217.312	5.87922	7.29157e-267	2.31373e-264	yes	Bcl2a1b	31.6667	1197.33	5.243	171.117	5.02845	1.35971e-123	4.32173e-121	yes	Arhgef4	244.333	2067	5.71033	44.3093	2.95596	7.87691e-83	2.50624e-80	yes
Lipa	605	9036.67	27.4687	347.396	3.66072	1.11092e-261	3.46435e-259	yes	Unc80	4069	367.333	58.6177	4.66733	-3.65067	1.40641e-123	4.39308e-121	yes	Klhdc7a	47.3333	666	0.697333	10.0197	3.84484	1.33731e-82	4.18163e-80	yes
Lsamp	5465	211.667	140.323	4.624	-4.92346	1.14638e-261	3.51432e-259	yes	Adgre1	124.667	3028.33	5.65	122.338	4.43648	1.91973e-123	5.89487e-121	yes	Uhrf1	1343	202.333	44.3037	6.79867	-2.7041	1.49459e-82	4.59421e-80	yes
Cd93	253.333	6507	5.109	111.138	4.44316	7.00224e-261	2.11083e-258	yes	Hpse	21.3333	2264.67	0.925	84.578	6.51469	2.73246e-123	8.25065e-121	yes	Ckap2l	716.667	67.6667	26.143	2.54033	-3.36333	1.6815e-82	5.08261e-80	yes
Tubb6	107.667	4205.67	8.28833	272.722	5.04021	2.04399e-260	6.06061e-258	yes	Slc15a3	48.6667	1757	2.81033	87.361	4.95818	9.07103e-123	2.6941e-120	yes	Hepacam	455.667	2269.33	17.1133	83.2587	2.28248	1.82315e-82	5.42044e-80	yes
Nckap1l	328.667	5277.67	9.44067	127.62	3.75682	4.88148e-260	1.42405e-257	yes	Fcgr2b	64	2239.33	5.70033	167.86	4.88007	1.04739e-122	3.06057e-120	yes	Fads2	1087.33	4713.67	39.3633	175.236	2.15438	8.21222e-82	2.40221e-79	yes
Tlr13	68.3333	3271	2.27733	91.8113	5.33325	2.35277e-259	6.75469e-257	yes	Tlr7	49	1155.67	1.75333	38.634	4.4617	1.43391e-121	4.12353e-119	yes	Slc22a17	462	2329	22.6423	117.328	2.37345	1.26122e-81	3.63071e-79	yes
Abat	10546.3	477	306.852	12.1213	-4.66192	2.56528e-258	7.24973e-256	yes	Tent5c	128	1978.33	3.055	41.0683	3.74878	2.61234e-121	7.39495e-119	yes	Bub1b	821.667	77	25.705	2.45033	-3.391	1.58364e-81	4.48765e-79	yes
Map2	12577	1062.67	349.109	26.3333	-3.72872	3.98871e-258	1.10991e-255	yes	Cd300a	25.3333	1876	0.731	46.9633	6.00552	2.90786e-121	8.10488e-119	yes	Cthrc1	1975.67	287.667	196.919	29.074	-2.7598	3.01603e-81	8.41518e-79	yes
Slc1a2	30156.3	1369.33	351.795	15.377	-4.51589	4.92346e-257	1.34925e-254	yes	Lamp5	3877	278.333	266.862	16.6733	-4.00048	7.16896e-121	1.96788e-118	yes	Clu	3197.67	25815.3	208.363	1743.47	3.06479	7.98062e-81	2.19298e-78	yes
Camk2b	4349.67	153.333	170.332	4.877	-5.12621	8.2977e-256	2.24001e-253	yes	Ccl6	93.3333	1881.33	8.79267	153.997	4.13045	1.7443e-120	4.71664e-118	yes	Spp1	335784	35433.7	27249.7	2954.74	-3.20514	1.01724e-79	2.75352e-77	yes
Capg	120	4999.67	12.9477	451.291	5.1233	1.45521e-255	3.87065e-253	yes	Creg1	518	5177	38.5367	381.562	3.30761	4.13129e-119	1.10069e-116	yes	Hmmr	684	68	20.1017	2.05133	-3.29268	2.79931e-79	7.46593e-77	yes
Tmem130	4807.33	94	230.842	3.786	-5.93009	5.17505e-254	1.35654e-251	yes	C4b	1078.67	16689	27.112	365.444	3.75265	1.73069e-118	4.54418e-116	yes	Lgi1	101.667	890.667	4.05033	29.4543	2.86237	3.59422e-79	9.44708e-77	yes
Iqgap1	487.667	10960.3	9.878	169.293	4.09916	2.02179e-253	5.22401e-251	yes	Atp2b3	1775.33	132.333	52.3077	3.375	-3.95406	1.89432e-118	4.90278e-116	yes	Pygm	183	1265.33	7.32833	51.5587	2.81466	5.46906e-78	1.41695e-75	yes
Cadps	5833.67	246.333	154.631	8.05367	-4.26304	8.4033e-253	2.14071e-250	yes	Scrt1	3309	246.667	100.955	6.62167	-3.93037	2.72021e-118	6.94114e-116	yes	Fads2b	17.6667	550.667	0.902333	28.4893	4.98062	2.56011e-77	6.53947e-75	yes
Itgam	410	7076.67	11.9067	174.116	3.8702	5.7395e-252	1.44181e-249	yes	Htr2c	1713	143.667	48.537	3.55433	-3.77143	1.84483e-117	4.64205e-115	yes	Plin2	22395.3	4449.67	1417.46	290.883	-2.2848	1.19056e-76	2.99888e-74	yes
Nat8l	11308.3	196	230.864	3.42367	-6.07536	1.78045e-251	4.41136e-249	yes	Scn8a	5464.33	482.667	67.0723	6.85	-3.29154	2.33459e-117	5.79395e-115	yes	Serpine1	4462	604	169.737	23.411	-2.85804	2.49425e-76	6.19669e-74	yes
Mapk8ip2	5254.33	167	126.69	3.432	-5.20611	6.59524e-251	1.612e-248	yes	Nsf	13745	1936.67	489.29	60.4153	-3.0177	5.36138e-117	1.3126e-114	yes	Lcat	152.333	1257.67	12.964	109.993	3.08483	2.76729e-76	6.78212e-74	yes
Sptb	4783.33	250.333	61.8583	2.813	-4.45879	1.00326e-250	2.41945e-248	yes	Ly9	15.3333	1422.33	0.871333	67.703	6.27985	8.48176e-116	2.04885e-113	yes	Gjb2	563	3700.67	26.7213	179.567	2.74846	8.04522e-76	1.94544e-73	yes
Ftl1	5023.67	144653	697.794	16970.9	4.60412	1.97263e-250	4.6946e-248	yes	Sncb	3549	353.333	364.172	31.8927	-3.51332	2.64862e-114	6.31383e-112	yes	Ccnd1	6318.67	1591.67	192.706	49.9167	-1.94881	7.09338e-75	1.6927e-72	yes
Itga5	71.3333	4132.67	2.20333	107.765	5.61205	7.77951e-250	1.82738e-247	yes	Lcn2	71.3333	3227.33	10.509	413.181	5.29708	9.2697e-113	2.18103e-110	yes	Cst3	8802	39439.3	1164.19	5384.36	2.20945	3.34866e-74	7.88718e-72	yes
Grin1	4595	65.6667	158.492	1.89133	-6.38886	6.26267e-248	1.45222e-245	yes	Kcnc1	3061	271	108.315	7.76333	-3.80242	1.50078e-112	3.48586e-110	yes	Tubb6	4205.67	965	272.722	64.2887	-2.08479	1.06852e-73	2.48446e-71	yes
Top2a	47	3010.67	1.223	66.1773	5.75784	2.06202e-247	4.72097e-245	yes	Ina	3735.33	329.333	154.37	11.954	-3.69082	4.46419e-112	1.02377e-109	yes	Atp1b1	809.333	4281.67	36.3207	195.412	2.42766	1.6573e-72	3.80466e-70	yes
Atp6v1g2	4601.67	134.333	405.743	10.5457	-5.26585	2.82503e-247	6.38703e-245	yes	Hapln4	3132.33	274.333	114.9	8.80267	-3.70629	9.28743e-112	2.10325e-109	yes	Luzp2	359	2117.67	8.35367	50.8427	2.60556	6.67065e-72	1.51224e-69	yes
Kcnc1	3061	47	108.315	1.14633	-6.56207	5.08515e-246	1.1355e-243	yes	Acp5	22	1162.33	2.14	96.283	5.4916	1.84864e-111	4.1348e-109	yes	Ablim2	171.667	1212.33	8.09633	58.1627	2.84475	7.90204e-72	1.76928e-69	yes
Dnajc6	3683.67	239	105.702	6.31967	-4.06401	3.47627e-245	7.66771e-243	yes	Gad2	1812.67	189.333	42.5947	3.86333	-3.46275	2.48245e-111	5.4847e-109	yes	Fzd10	33.6667	636.333	1.16433	22.977	4.30261	4.95707e-71	1.09636e-68	yes
Prkar1b	10319	617.333	562.271	27.1553	-4.37196	1.67305e-242	3.64583e-240	yes	Atp6v1g2	4601.67	557.667	405.743	43.6497	-3.21652	1.34665e-110	2.93942e-108	yes	Mcm5	1267.67	241.333	52.0447	10.0377	-2.37433	6.07824e-71	1.32813e-68	yes
Vsnl1	8865.67	128.667	625.363	7.64667	-6.35372	1.13254e-240	2.4386e-238	yes	Gad1	3203.33	338.333	140.178	12.201	-3.52219	2.53199e-110	5.46095e-108	yes	Kif23	520.333	45.3333	21.2923	1.852	-3.52318	4.66435e-70	1.00706e-67	yes
Kcnc3	8586.33	50	232.013	1.389	-7.38402	9.97386e-238	2.12232e-235	yes	Ly86	142	1669.33	16.8717	172.958	3.35775	3.41826e-110	7.28572e-108	yes	Mcm6	2422	547	94.4367	21.6383	-2.12576	6.26047e-70	1.33576e-67	yes
Scg5	7867.33	313.333	871.538	29.5337	-4.88313	1.74515e-236	3.6703e-234	yes	Elmod1	1861	157.667	95.952	7.11	-3.75439	4.92601e-110	1.03773e-107	yes	Igf2	4353.67	40779.7	133.281	1279.19	3.26269	5.63651e-69	1.18865e-66	yes
Sncb	3549	53.3333	364.172	4.64567	-6.29259	1.59392e-235	3.3137e-233	yes	Cmtm3	133	2051.33	12.7707	161.369	3.65945	1.14499e-109	2.38434e-107	yes	Pfkm	755	3379	30.5017	137.585	2.17336	1.10601e-68	2.29461e-66	yes
Stxbp1	17303.3	878.333	632.303	26.3983	-4.5821	2.16201e-235	4.44367e-233	yes	Cybb	75.6667	2907.33	2.18	71.6013	5.03759	1.88674e-109	3.88433e-107	yes	Adam8	8318.33	1042	304.661	39.1483	-2.96018	1.1134e-68	2.29461e-66	yes
Serpine1	31	4462	1.38667	169.737	6.93553	1.54611e-234	3.14208e-232	yes	Cd48	35.3333	979.333	4.02167	96.8193	4.58943	2.00775e-109	4.08701e-107	yes	Atp1a2	4347.33	21257.3	99.8063	458.54	2.19985	3.55652e-68	7.2473e-66	yes
Kcnq2	3232.33	105.667	62.5123	1.674	-5.22277	2.47735e-232	4.97865e-230	yes	Arhgap25	50.6667	994	2.34933	41.25	4.13407	7.34792e-109	1.47914e-106	yes	Tagln3	311.667	1902.67	28.621	180.055	2.65329	7.09977e-68	1.43068e-65	yes
Slc6a5	7761.33	66.6667	146.85	1.072	-7.09789	8.51773e-232	1.69297e-229	yes	Itgam	410	3406.67	11.9067	85.861	2.85023	9.14733e-109	1.82112e-106	yes	Cldn19	256.333	1190	13.211	52.621	1.9939	7.55035e-68	1.50476e-65	yes
Slc6a1	6092	336	189.775	8.904	-4.41369	1.55017e-229	3.0476e-227	yes	Csf1r	1682	11750.3	75.518	431.441	2.51427	4.05116e-108	7.97771e-106	yes	Esm1	689.333	71.3333	37.515	3.987	-3.23409	3.25933e-67	6.42513e-65	yes
Mki67	47	2617	0.670667	29.934	5.48005	2.92226e-228	5.68332e-226	yes	Atp2b2	8118.67	896.333	226.44	20.013	-3.50012	1.68135e-107	3.27538e-105	yes	Ccnb2	625.333	70.6667	46.594	5.41467	-3.1052	3.38255e-67	6.59634e-65	yes
Atp1a3	46285.7	2106	1710.91	66.0787	-4.69443	4.24408e-228	8.16624e-226	yes	Ryr2	2045.67	194	35.225	2.87567	-3.61463	2.30204e-107	4.43682e-105	yes	Hal	6628.67	1005.67	199.013	31.9723	-2.63796	3.89666e-67	7.51807e-65	yes
Ctsz	844	14592.7	78.744	1152.17	3.87104	1.64816e-227	3.13793e-225	yes	Atp1a3	46285.7	6054	1710.91	195.451	-3.12988	1.76316e-106	3.36243e-104	yes	Ect2	652	82.3333	18.935	2.52233	-2.90822	3.96011e-67	7.56005e-65	yes
Disp2	10543	421.333	216.102	7.27033	-4.89354	2.73884e-227	5.16014e-225	yes	Irf8	118.333	2176.33	5.55533	89.3577	4.00765	1.47682e-105	2.78703e-103	yes	Acsbg1	855	4521	34.8153	188.075	2.43352	7.42872e-67	1.40341e-64	yes
Zcchc18	3667.67	236.333	221.154	12.0433	-4.19874	7.10041e-226	1.32397e-223	yes	Chga	3671.67	471.333	261.608	29.4413	-3.15149	2.03321e-105	3.79749e-103	yes	Gabrb1	66.3333	748	1.06033	8.09667	2.93281	1.14933e-66	2.1489e-64	yes
Aldoc	27722.3	927.667	1930.04	54.2707	-5.15232	9.5374e-225	1.76023e-222	yes	Cd109	123.667	1690	2.85433	33.8673	3.56867	3.66103e-105	6.76806e-103	yes	Stx1b	242.667	1195.33	6.116	31.2417	2.35281	1.50853e-66	2.7917e-64	yes
Cntn1	7277.67	760	185.529	16.632	-3.47961	1.54351e-224	2.81995e-222	yes	Cd63	1595.33	13716.3	201.977	1514.52	2.90659	9.4521e-105	1.72973e-102	yes	Aldh1a3	1368	166	54.2787	6.23333	-3.12231	8.61122e-66	1.57751e-63	yes
Caln1	2706.67	39	65.1457	0.513333	-6.98763	6.39318e-222	1.15633e-219	yes	Diras2	1969.33	227.333	55.2993	5.58333	-3.30806	1.8207e-104	3.29855e-102	yes	Padi2	1706	6654.67	40.8423	163.234	1.9988	1.01505e-65	1.8409e-63	yes
Fnip2	224.333	3520.33	4.496	69.448	3.94922	8.70412e-221	1.55873e-218	yes	Cntnap1	3867.67	538.667	95.482	11.6277	-3.03767	3.332e-104	5.97682e-102	yes	Lsamp	211.667	1348	4.624	43.4573	3.23239	1.46282e-65	2.6267e-63	yes
Nap1l2	2536	79	138.092	3.65933	-5.23791	7.55269e-220	1.33927e-217	yes	Cplx1	21139.7	2636	1291.48	141.626	-3.18887	3.8379e-104	6.81678e-102	yes	Plk1	777	75.6667	40.3067	4.00733	-3.3303	1.4884e-65	2.64643e-63	yes
Tpm4	729.667	12348	45.4257	656.536	3.8533	7.75388e-220	1.3616e-217	yes	Havcr2	57	1081	2.93067	46.5917	3.99077	5.76412e-104	1.01387e-101	yes	Knstrn	797.333	111.667	58.1867	9.20567	-2.66009	4.57285e-65	8.05177e-63	yes
AI593442	2013.67	57.6667	48.0283	1.17033	-5.35889	9.26678e-218	1.61162e-215	yes	Mafb	187.667	2478.33	7.48767	85.9877	3.52154	4.67192e-103	8.13858e-101	yes	Prr11	580.333	68.6667	17.3747	2.10467	-3.04532	4.91132e-65	8.56459e-63	yes
Cplx1	21139.7	328.333	1291.48	17.2867	-6.22322	1.59648e-216	2.75005e-214	yes	Abcc3	45.6667	1868.33	1.225	43.3417	5.1449	6.3772e-103	1.10034e-100	yes	Wnt6	136.667	805.667	7.52	45.627	2.60108	6.35218e-65	1.09717e-62	yes
Snrpn	10869.3	798	752.384	47.2007	-3.99459	3.14957e-215	5.37418e-213	yes	Cotl1	1033.67	7319	87.029	536.071	2.62286	1.31608e-102	2.24938e-100	yes	Col26a1	52.3333	611	2.15267	25.7833	3.58224	2.21284e-64	3.77703e-62	yes
Loxl2	139.667	6283.33	3.566	136.554	5.25902	9.88996e-215	1.67177e-212	yes	Tgfb1	150	2144.67	9.724	116.557	3.58334	2.31116e-102	3.9132e-100	yes	Entpd2	138.667	998.667	8.184	60.282	2.88085	2.2284e-64	3.77703e-62	yes
Stab1	235.667	8593	4.22233	127.787	4.91956	2.55796e-214	4.28387e-212	yes	Cyth4	181.333	2843	9.77333	133.953	3.77674	1.1086e-101	1.85967e-99	yes	Atp2b2	128	896.333	2.548	20.013	2.9735	8.77637e-64	1.47378e-61	yes
Dnm3	5787.67	438.667	113.764	14.147	-3.00748	6.62951e-214	1.10007e-211	yes	Tmem130	4807.33	574.333	230.842	24.0233	-3.2644	1.66729e-101	2.77122e-99	yes	Mt1	2998.67	13474.3	619.223	2876.09	2.21558	9.01225e-64	1.49951e-61	yes
Glrb	4878.33	425.333	236.576	18.838	-3.65058	1.71081e-213	2.81304e-211	yes	Timp1	39.3333	1202.33	6.04167	164.102	4.7635	5.49362e-101	9.048e-99	yes	Edn3	22.6667	428.667	0.831667	16.0767	4.27282	9.61013e-64	1.5732e-61	yes
Slc39a12	2602.67	58	131.602	2.482	-5.72854	3.53187e-213	5.75504e-211	yes	Fcgr3	167	2614.33	16.8507	227.49	3.75492	1.02332e-100	1.65547e-98	yes	Cdca3	661	91.6667	48.2173	7.161	-2.75132	9.62866e-64	1.5732e-61	yes
Lonrf2	2925	137.667	67.781	2.65267	-4.67537	8.51672e-213	1.37537e-210	yes	Tspyl4	10916	1827	377.647	55.3613	-2.77009	1.02341e-100	1.65547e-98	yes	Tk1	600.333	66.3333	47.5353	5.386	-3.14171	1.00566e-63	1.62845e-61	yes
Gprasp2	2867	132.333	101.725	3.94267	-4.68936	3.96786e-212	6.35104e-210	yes	AI593442	2013.67	221.667	48.0283	4.63033	-3.3747	2.86011e-100	4.58554e-98	yes	Gpam	1088.33	4202.33	22.085	96.19	2.12282	1.09271e-63	1.75375e-61	yes
Ache	2656.33	73.6667	164.958	3.83867	-5.42535	1.37191e-211	2.17664e-209	yes	Slc32a1	2221.33	164	105.999	6.84567	-3.95272	7.11505e-100	1.13073e-97	yes	Pf4	1237.67	70	236.908	13.944	-4.08661	1.30303e-63	2.07297e-61	yes
Fgf12	2493	81	136.25	5.38967	-4.65991	4.02049e-211	6.32336e-209	yes	Snap91	4748	658	148.286	18.5747	-2.99698	4.06337e-99	6.4014e-97	yes	Acsl6	208	1425	6.70967	44.5997	2.73272	3.07553e-63	4.85025e-61	yes
Hapln4	3132.33	89	114.9	2.77233	-5.37313	1.05396e-210	1.64336e-208	yes	Csf2ra	50	931	3.653	58.9553	4.01247	7.24285e-99	1.1312e-96	yes	Cpz	23.6667	477	1.20333	24.7643	4.36316	4.31978e-63	6.75376e-61	yes
Tyrobp	295.667	6675.67	66.691	1274.76	4.25659	3.62559e-209	5.60479e-207	yes	Nrsn1	2863.67	313	174.803	16.634	-3.39352	3.14027e-98	4.86259e-96	yes	Podxl2	345.667	1870	19.1453	107.102	2.48392	4.57534e-63	7.09216e-61	yes
Acp5	22	2884.33	2.14	230.091	6.74845	4.7829e-209	7.33121e-207	yes	Tbxas1	39.3333	1041.67	3.22867	67.638	4.38882	5.89274e-98	9.04735e-96	yes	Srgn	8067.33	1688	971.99	207.171	-2.23012	5.53054e-63	8.50017e-61	yes
Plau	77.6667	3332	4.48833	162.293	5.17627	2.15088e-208	3.26916e-206	yes	Atp1b1	29311.3	4281.67	1528.41	195.412	-2.96744	6.47366e-98	9.85573e-96	yes	Ntm	97	793.333	5.87467	46.1197	2.9728	2.57011e-62	3.91694e-60	yes
C1qc	598	11041	66.8143	1046.43	3.96918	4.01557e-208	6.05247e-206	yes	Dnm1	15832	1926.33	676.965	69.6077	-3.28176	1.11156e-97	1.67818e-95	yes	Ramp1	173.667	1158	9.06267	61.259	2.75691	3.64831e-62	5.51381e-60	yes
Fcgr2b	64	3797	5.70033	278.531	5.61065	9.8502e-208	1.4724e-205	yes	Plin2	470.333	4449.67	35.6563	290.883	3.02821	1.38881e-97	2.07943e-95	yes	Kif4	485	50.6667	11.1407	1.201	-3.21353	4.02689e-62	6.03567e-60	yes
Fblim1	43.6667	2059	2.632	95.6463	5.18348	3.20656e-207	4.75385e-205	yes	Naglu	146	2387.67	7.66933	108.936	3.82823	2.92229e-97	4.3396e-95	yes	Msr1	7964.33	1345.67	353.807	61.1173	-2.53331	1.81901e-61	2.70406e-59	yes
Mafb	187.667	3594.67	7.48767	121.754	4.02331	9.86137e-207	1.4501e-204	yes	Lonrf2	2925	407	67.781	7.79	-3.12119	4.79892e-97	7.06846e-95	yes	Pbk	635.333	89.6667	42.1337	6.127	-2.78172	4.72079e-61	6.96068e-59	yes
Cd14	112	3012	9.20633	209.304	4.50683	1.9998e-206	2.91697e-204	yes	Myo1f	120	2173.67	4.218	66.3817	3.97615	1.79242e-96	2.61882e-94	yes	Mpz	5227.67	24345	399.197	1897.43	2.24887	6.97681e-61	1.02041e-58	yes
Slc22a17	5953	462	342.554	22.6423	-3.91924	4.90612e-204	7.09897e-202	yes	Ucp2	1154	11043.3	83.9147	692.339	3.04448	2.08305e-96	3.01909e-94	yes	Slc15a2	63.3333	701.667	2.215	21.372	3.27034	1.41836e-60	2.05787e-58	yes
Dmtn	2894.67	165.333	152.262	7.40533	-4.36185	2.58649e-203	3.71284e-201	yes	C3	1641	27461.7	45.415	693.221	3.93207	5.48268e-96	7.88331e-94	yes	Bub1	471.333	43.6667	15.803	1.50333	-3.39396	2.04531e-60	2.94395e-58	yes
Gabbr2	2378	75.3333	55.578	1.49767	-5.21373	2.15911e-202	3.07494e-200	yes	Grin2a	975	70.6667	9	0.568	-3.98596	1.01439e-95	1.44706e-93	yes	Jph4	68.3333	590.667	1.82233	17.0203	3.2234	3.79382e-60	5.4177e-58	yes
Rph3a	11324	309.667	370.157	8.50733	-5.44329	5.21661e-202	7.37132e-200	yes	Slc6a5	7761.33	557.667	146.85	9.216	-3.99406	3.7324e-95	5.2828e-93	yes	Trpm3	178.333	968.333	2.60867	12.4133	2.25051	1.34505e-59	1.90577e-57	yes
Laptm5	731.667	8064.33	39.4053	404.233	3.35872	9.27035e-202	1.29979e-199	yes	Vamp1	18935.3	1845.33	911.944	79.3823	-3.52205	6.07378e-95	8.53012e-93	yes	Foxm1	905.333	176	24.9113	5.23367	-2.25091	1.5513e-59	2.18095e-57	yes
Gabrg2	1819.67	37.6667	81.557	1.441	-5.82267	3.87456e-200	5.39071e-198	yes	Parvg	80	1511.33	4.13967	68.534	4.04923	1.0498e-94	1.46302e-92	yes	Cntn1	760	3438.67	16.632	74.671	2.16659	3.34033e-59	4.66001e-57	yes
Ppm1e	2454.67	149.667	52.0273	2.70333	-4.26646	7.26765e-200	1.00343e-197	yes	Ms4a7	11	1348.33	1.20933	123.371	6.67265	1.54837e-94	2.14136e-92	yes	Cplx1	328.333	2636	17.2867	141.626	3.03435	3.64672e-59	5.04861e-57	yes
Bend6	5516.67	263	302.294	12.47	-4.59942	1.40797e-199	1.92924e-197	yes	Ctsb	13638.7	117064	386.302	2880.67	2.89861	2.4678e-94	3.38706e-92	yes	Slc37a2	3400.33	744	96.4557	20.7633	-2.21583	5.00097e-59	6.87103e-57	yes
Pnma8b	5272.67	290.667	170.674	7.97033	-4.42046	1.43718e-199	1.95445e-197	yes	Hal	26	1005.67	0.896667	31.9723	5.15611	5.76905e-94	7.85849e-92	yes	Rab11fip4	360.333	1565	5.90633	30.98	2.391	5.99816e-59	8.15217e-57	yes
Slc11a1	57.6667	2717	3.391	133.793	5.30215	1.64671e-199	2.2227e-197	yes	Nrxn3	2226	294	47.1533	5.494	-3.10143	5.83854e-94	7.89379e-92	yes	Cpxm2	152	1162	4.99633	39.002	2.96461	6.02333e-59	8.15217e-57	yes
Rnf157	6223.33	398.333	222.044	11.2007	-4.30919	2.10162e-199	2.8157e-197	yes	Camk2b	4349.67	548.667	170.332	18.9103	-3.17111	8.03423e-94	1.07819e-91	yes	Itgbl1	362.333	1846	10.3437	54.1347	2.38781	8.5058e-59	1.14268e-56	yes
Abca1	592.667	14981.7	7.81633	166.649	4.41418	6.602e-198	8.78018e-196	yes	Msr1	41.6667	1345.67	2.235	61.1173	4.77323	1.21064e-93	1.61273e-91	yes	Mt2	2766.33	11256.7	615.443	2587.82	2.07204	9.98948e-59	1.33213e-56	yes
Scrt1	3309	41	100.955	1.059	-6.57487	9.92094e-198	1.30978e-195	yes	Itgb5	1363.67	9569.33	62.4733	399.09	2.6754	1.55779e-93	2.06003e-91	yes	Gpd1	8492	1969.67	337.077	80.695	-2.06253	1.4697e-58	1.94558e-56	yes
Acsl6	4948	208	169.943	6.70967	-4.66267	7.79424e-195	1.02155e-192	yes	Cd33	114.333	1153.33	3.13533	28.1267	3.16525	3.49151e-93	4.58374e-91	yes	Racgap1	1340.33	281.667	54.7643	11.961	-2.1949	1.68511e-58	2.21458e-56	yes
Ncdn	13620	981	538.182	31.136	-4.11144	8.92607e-195	1.16148e-192	yes	Unc93b1	278.667	4622.67	19.3727	253.728	3.71119	7.38189e-93	9.62142e-91	yes	Slc1a3	664	2476.67	18.685	70.0077	1.90563	3.53442e-58	4.61153e-56	yes
Sult4a1	6986.67	173.667	392.928	8.67833	-5.5007	1.03706e-194	1.33981e-192	yes	Nat8l	11308.3	1169.33	230.864	21.082	-3.45296	1.88407e-92	2.43812e-90	yes	Kif2c	570.667	67	22.9893	2.75067	-3.06311	3.93373e-58	5.09587e-56	yes
Brsk1	5360	303	242.224	12.4407	-4.2832	1.11987e-194	1.43653e-192	yes	Cx3cr1	755	4860.67	27.1407	151.618	2.48191	1.46628e-91	1.88401e-89	yes	Cdc20	948	153.667	60.699	10.0053	-2.6009	7.04164e-58	9.05725e-56	yes
Ptprn2	1923.67	54.6667	79.3097	1.87067	-5.40587	4.37474e-193	5.57225e-191	yes	Stxbp1	17303.3	2281.67	632.303	72.467	-3.12522	3.56849e-91	4.55284e-89	yes	Tpm4	12348	3437.67	656.536	186.856	-1.81295	7.58544e-58	9.688e-56	yes
Cend1	5057	290.667	391.711	19.233	-4.34814	5.04509e-193	6.38116e-191	yes	Gprasp1	8356.33	1533	217.458	34.8443	-2.64174	3.80836e-91	4.8249e-89	yes	F7	1210	95.3333	73.879	5.95033	-3.63412	8.90285e-58	1.12911e-55	yes
Ina	3735.33	49.3333	154.37	1.76	-6.45467	1.12501e-192	1.41305e-190	yes	Clvs1	749.333	42	27.983	1.36633	-4.35617	8.99023e-90	1.13108e-87	yes	Cdca8	578	78	40.6467	5.60267	-2.85895	1.15623e-57	1.45621e-55	yes
Ctsc	305.333	6758.33	16.028	318.278	4.31162	1.5442e-192	1.92621e-190	yes	Prepl	7877.67	1354.33	335.629	51.4207	-2.70645	9.49471e-90	1.18632e-87	yes	Kif11	649	91.3333	15.3943	2.22567	-2.79009	2.01277e-57	2.51749e-55	yes
Peg3	6415.33	638.333	99.8333	8.49933	-3.5541	2.72568e-192	3.37666e-190	yes	Cd52	45.3333	1083.33	11.7773	245.892	4.38394	1.1057e-89	1.37205e-87	yes	Dlgap5	408.333	36	16.8217	1.666	-3.33586	2.41822e-57	3.0039e-55	yes
Ntsr2	2052.33	25.3333	195.845	2.058	-6.57233	5.68276e-192	6.99212e-190	yes	Slc6a11	9526.33	1355.33	307.998	38.4913	-3.00031	1.22886e-89	1.51451e-87	yes	Syt2	69	713.667	2.05667	23.8267	3.5342	3.34342e-57	4.12492e-55	yes
Septin3	3695.33	337.333	117.551	12.8203	-3.19678	1.98713e-191	2.42846e-189	yes	Adam12	107	1749	1.882	26.8043	3.83213	1.61863e-89	1.9814e-87	yes	Ccdc190	46.3333	475.333	3.32067	35.753	3.42852	6.45999e-57	7.90679e-55	yes
Sv2b	2377	105.333	59.9713	2.24167	-4.74163	2.13884e-191	2.59632e-189	yes	Smim17	999.667	59.3333	44.107	2.17867	-4.33949	2.07542e-89	2.52352e-87	yes	Vamp1	255.333	1845.33	11.4617	79.3823	2.792	6.49599e-57	7.90679e-55	yes
Kif5a	23708.7	1680.67	505.466	30.7483	-4.03903	2.82907e-191	3.41129e-189	yes	Blnk	38.3333	835.333	2.481	46.5677	4.23033	2.42847e-89	2.93311e-87	yes	Kcne5	70	701.667	5.21167	52.942	3.3446	2.14322e-56	2.5913e-54	yes
Pcsk2	2593.67	77.3333	74.1053	1.85167	-5.32268	3.12099e-191	3.73837e-189	yes	Vim	1888.67	29874.3	116.928	1593.42	3.76843	3.97972e-89	4.77488e-87	yes	Nes	5573.33	1354.67	106.47	26.4897	-2.00695	8.68753e-56	1.04342e-53	yes
Adcy1	3039	252.667	33.3747	2.36367	-3.81965	7.5735e-191	9.01197e-189	yes	Kcnq2	3232.33	391.333	62.5123	6.379	-3.29274	4.79894e-89	5.7199e-87	yes	Ldhb	1434.33	4859.33	127.894	444.466	1.79713	1.138e-55	1.35781e-53	yes
Caskin1	2257.33	61.3333	51.8467	1.21833	-5.41127	1.09221e-190	1.29116e-188	yes	Pld4	233.333	2797	15.9117	164.46	3.36958	2.6897e-88	3.18492e-86	yes	Thra	966.667	3339	52.8713	183.787	1.79747	2.25627e-55	2.67449e-53	yes
Mapk10	3637.67	221	106.846	6.14767	-4.11935	3.46747e-190	4.07247e-188	yes	C1s1	40	1737	1.83867	69.8853	5.24826	3.44316e-88	4.05063e-86	yes	Plcd4	67	563.333	2.71633	23.7017	3.12526	5.92102e-55	6.97296e-53	yes
Cntnap2	2258.67	41.3333	57.359	1.44267	-5.31321	3.62853e-190	4.23414e-188	yes	Cnnm1	1211.67	107.667	35.6427	2.60067	-3.77665	3.98302e-88	4.65551e-86	yes	Prelp	863.667	4653.67	27.3097	150.04	2.45787	8.59782e-55	1.006e-52	yes
Syk	76	2739.33	1.93233	60.643	4.97193	6.19254e-190	7.17977e-188	yes	Panx2	1894.67	157.667	83.1323	6.303	-3.7213	5.51989e-88	6.4105e-86	yes	Slc2a4	25.3333	371.333	1.32267	19.649	3.89293	1.41244e-54	1.64205e-52	yes
Slc37a2	27	3400.33	0.884667	96.4557	6.76859	2.46575e-189	2.84063e-187	yes	Clstn3	6812	916	227.733	27.0553	-3.07336	7.08088e-88	8.17098e-86	yes	Ncaph	606.333	102.667	25.9477	4.81267	-2.4307	2.59055e-54	2.99249e-52	yes
Jph3	2239.67	63	82.8503	2.00433	-5.36931	1.09954e-188	1.25869e-186	yes	Sh3gl2	4302	404.667	206.181	16.918	-3.60728	8.75678e-88	1.00409e-85	yes	Kntc1	406	40.3333	6.80133	0.837333	-3.02194	2.88367e-54	3.31002e-52	yes
Dync1i1	2722	81.3333	138.71	3.59867	-5.26847	3.55901e-188	4.04854e-186	yes	Ptprc	86.6667	1577	2.69833	39.849	3.8844	1.09097e-87	1.24308e-85	yes	Nat8l	196	1169.33	3.42367	21.082	2.6224	3.70727e-54	4.22862e-52	yes
Arhgdib	237.333	3713.67	27.5423	371.73	3.75453	5.80419e-187	6.56128e-185	yes	Cd180	66.6667	1035.33	3.65633	47.6047	3.70263	3.79333e-87	4.29524e-85	yes	Cpxm1	509.333	3271	24.5633	161.292	2.7151	7.08683e-54	8.03292e-52	yes
Rab11fip4	4354	360.333	90.8093	5.90633	-3.94251	2.42791e-186	2.72755e-184	yes	P2ry6	60	977.333	4.121	58.7107	3.83256	5.603e-87	6.30495e-85	yes	Nusap1	547.667	87.6667	20.886	3.385	-2.62531	7.21868e-54	8.13155e-52	yes
Slc15a3	48.6667	1979.67	2.81033	96.6993	5.10469	1.39008e-185	1.552e-183	yes	Ankrd34b	907	74.6667	31.0563	2.24267	-3.7916	6.85797e-87	7.6695e-85	yes	Kcnk1	77.3333	654.333	4.05633	35.7687	3.14045	7.7598e-54	8.68714e-52	yes
Adam12	107	2325.67	1.882	34.7947	4.20853	2.00632e-185	2.22628e-183	yes	Galns	94.6667	1110.67	5.00733	52.0177	3.37689	7.02087e-87	7.8035e-85	yes	Il1rn	2114	256.333	145.164	18.361	-2.98296	2.35325e-53	2.61832e-51	yes
Srgn	223	8067.33	32.8387	971.99	4.88747	9.23453e-185	1.01845e-182	yes	Scn4b	5847.67	525.667	156.764	12.46	-3.65322	8.02609e-87	8.86638e-85	yes	Aurka	530	62.3333	32.431	3.949	-3.03781	3.33287e-53	3.68567e-51	yes
Rrm2	26.3333	1652	1.75	86.3823	5.62531	4.54562e-183	4.98283e-181	yes	Ms4a6c	33.6667	988.667	2.47867	62.91	4.66565	2.18906e-86	2.40358e-84	yes	Tpm2	976	220.667	90.268	20.0583	-2.17001	3.82142e-53	4.20032e-51	yes
Gabra3	2067	109.667	76.1193	3.50667	-4.44009	8.0096e-183	8.72709e-181	yes	Nap1l2	2536	285.333	138.092	13.6557	-3.33806	2.51678e-86	2.74678e-84	yes	Spon1	486.333	1982.33	9.11533	37.813	2.05251	8.26416e-53	9.02884e-51	yes
Arhgef9	3243.33	286	92.826	7.73867	-3.58437	2.11791e-182	2.29381e-180	yes	Syp	12422	1898.33	644.875	86.1303	-2.90443	5.841e-86	6.33661e-84	yes	Gpm6a	556.667	2343.67	19.6803	85.6917	2.1224	1.06855e-52	1.16044e-50	yes
Timp1	39.3333	3404.33	6.04167	450.171	6.21938	3.06305e-182	3.2977e-180	yes	Dnase2a	73	1037.67	6.642	78.5967	3.56478	8.58546e-86	9.25849e-84	yes	Snap25	389.333	1985.33	21.156	111.45	2.39725	1.20053e-52	1.296e-50	yes
C1qa	891.333	10302.7	115.185	1130.52	3.29496	7.27602e-182	7.78706e-180	yes	Eno2	17385.3	2821	970.788	129.564	-2.90549	9.03128e-86	9.68164e-84	yes	Nuf2	521.333	72	28.4957	4.086	-2.80198	1.29153e-52	1.38599e-50	yes
Prc1	41.3333	1561.67	2.47333	64.6413	4.70793	1.42732e-181	1.51858e-179	yes	Map2	12577	2593.67	349.109	62.294	-2.48651	9.10892e-86	9.70743e-84	yes	Zranb3	1137.33	124.667	30.5193	3.44333	-3.14785	1.91965e-52	2.04793e-50	yes
Creg1	518	5935.33	38.5367	466.734	3.5983	2.37152e-181	2.5084e-179	yes	Peg3	6415.33	1195.33	99.8333	16.234	-2.6205	1.70333e-85	1.80464e-83	yes	Phkg1	17.6667	333	1.22167	16.4023	3.74698	2.49066e-52	2.64156e-50	yes
Sptbn2	3537.67	208	59.1773	2.98967	-4.30699	1.06857e-180	1.12367e-178	yes	Bend6	5516.67	554.667	302.294	26.7877	-3.49631	3.10623e-85	3.27184e-83	yes	Gpr179	10.3333	335.667	0.127	4.25233	5.06535	6.52651e-52	6.88167e-50	yes
Kif5c	11098.3	1113.67	217.845	18.652	-3.5459	1.10761e-180	1.15799e-178	yes	Tmem59l	3050.67	412.667	275.36	32.439	-3.08552	1.8002e-84	1.88521e-82	yes	Ecm2	222.667	1046.67	7.112	34.204	2.26584	1.28435e-51	1.34641e-49	yes
Prrt2	1929.33	115.333	110.708	5.46233	-4.3411	1.78877e-180	1.8594e-178	yes	Lyn	166.667	1900	6.53533	64.5147	3.30329	2.67346e-84	2.78362e-82	yes	Gria1	118	1126.33	3.32767	23.7467	2.83514	1.5917e-51	1.65903e-49	yes
Adcyap1r1	4262.67	275	108.797	5.96333	-4.18938	2.19687e-180	2.27055e-178	yes	Gabra3	2067	336	76.1193	10.777	-2.82031	3.57132e-84	3.69724e-82	yes	Gdpd2	21	334.333	0.962	15.7827	4.03616	2.83461e-51	2.93762e-49	yes
Havcr2	57	1888.67	2.93067	79.4523	4.76079	2.27265e-180	2.33554e-178	yes	C1ra	75	2168.67	3.40367	84.7037	4.63726	5.02397e-84	5.17155e-82	yes	Spock2	764.667	4325.67	16.737	97.4657	2.54185	3.33339e-51	3.4349e-49	yes
Cd180	66.6667	2762.33	3.65633	121.873	5.05884	3.70449e-180	3.78548e-178	yes	Ache	2656.33	375.667	164.958	20.1853	-3.03072	6.41903e-84	6.57026e-82	yes	Ctsf	309	1464.67	17.795	89.4743	2.33	3.60137e-51	3.69008e-49	yes
Fosl2	170.333	2375.33	3.509	41.4657	3.56279	3.89779e-180	3.96063e-178	yes	Nrsn2	1747.33	190.333	161.352	15.248	-3.40352	1.36525e-83	1.38956e-81	yes	Hilpda	817.667	146	94.7027	17.3933	-2.44487	3.92501e-51	3.9991e-49	yes
Ryr2	2045.67	40	35.225	0.507	-6.11847	5.78866e-179	5.84913e-177	yes	Pla2g15	256.333	2292.33	12.8637	99.2507	2.94777	1.60828e-83	1.62778e-81	yes	Ppp1r1b	59	467.667	3.59767	31.1643	3.11476	4.19039e-51	4.24564e-49	yes
Rtn1	6742	804	590.43	57.5223	-3.35957	6.08696e-178	6.11638e-176	yes	Trim37	5885	944	145.662	20.429	-2.83393	1.69931e-83	1.71036e-81	yes	Slc6a20a	227.667	1506.67	9.56633	64.4383	2.75188	4.81935e-51	4.85576e-49	yes
Lynx1	7758.33	656	259.887	18.9833	-3.77508	2.55671e-177	2.55487e-175	yes	Tmem176a	470.667	3073.33	48.2587	290.035	2.58737	5.18638e-83	5.19125e-81	yes	Slc16a1	1383.67	4877.33	35.7113	129.483	1.85831	6.55334e-51	6.56637e-49	yes
Hecw1	1724.33	22.6667	30.433	0.389667	-6.28725	3.07855e-177	3.05944e-175	yes	Arhgdib	237.333	2673.33	27.5423	271.346	3.30041	5.72257e-83	5.69647e-81	yes	Tacc3	1023	192.333	57.1173	10.3983	-2.45758	8.81234e-51	8.78135e-49	yes
Iqsec3	3842.33	103	72.3797	1.69133	-5.41935	5.85291e-177	5.78479e-175	yes	Sptb	4783.33	823.333	61.8583	9.41967	-2.71522	9.42695e-83	9.33268e-81	yes	Angpt1	109	728.333	2.90767	20.0863	2.78828	9.98586e-51	9.89637e-49	yes
Gad1	3203.33	143.667	140.178	5.31667	-4.72059	1.09106e-176	1.0725e-174	yes	Ncf2	128.667	1757	7.915	84.2373	3.4118	1.08183e-82	1.06519e-80	yes	Aldh1a1	790.667	3512.67	49.465	232.907	2.23527	1.10682e-50	1.09094e-48	yes
Cthrc1	45.6667	1975.67	5.21767	196.919	5.23805	8.74886e-176	8.55354e-174	yes	Dock3	2415.67	360.333	53.8583	8.557	-2.65399	1.50654e-82	1.47535e-80	yes	Hmgb2	1599.33	417.333	76.09	18.6213	-2.03075	1.37375e-50	1.34672e-48	yes
Kcnk9	2472.67	35.6667	27.0473	0.337333	-6.32517	1.07647e-175	1.04678e-173	yes	Rph3a	11324	1141	370.157	32.5727	-3.5064	1.77299e-82	1.72695e-80	yes	Syp	416	1898.33	18.3057	86.1303	2.23423	3.12512e-50	3.04716e-48	yes
Gpm6a	6904	556.667	289.094	19.6803	-3.87671	2.01099e-175	1.94507e-173	yes	Adam8	37.6667	1042	1.629	39.1483	4.58689	5.34123e-82	5.17471e-80	yes	Adam23	338.333	1323.67	7.95367	27.1147	1.76938	3.62389e-50	3.51459e-48	yes
Agt	3016.33	72.3333	213.121	4.328	-5.62183	2.79151e-175	2.68564e-173	yes	Itga5	71.3333	1209.67	2.20333	32.2343	3.87084	9.6625e-82	9.31147e-80	yes	Ecrg4	76.3333	723.667	9.793	93.614	3.2569	4.77262e-50	4.60405e-48	yes
Adam23	5614.33	338.333	123.051	7.95367	-3.95149	1.16075e-174	1.11081e-172	yes	Cd22	7	1097.33	0.349	47.945	7.10201	9.88063e-82	9.47129e-80	yes	Cks1b	734.333	151.333	98.8903	21.0047	-2.23512	7.44874e-50	7.14764e-48	yes
Gabbr1	8872.67	663.667	321.88	23.3	-3.78812	7.28556e-173	6.93547e-171	yes	Ptafr	27.3333	1144.67	1.01633	36.6147	5.17098	1.7466e-81	1.66543e-79	yes	Aurkb	483.667	76.3333	28.632	4.61833	-2.63218	7.60221e-50	7.25651e-48	yes
Gdap1	1956.33	91	66.607	2.71467	-4.61683	7.86305e-173	7.44602e-171	yes	Glra1	1554	52.6667	90.5547	2.69267	-5.07168	2.11402e-81	2.00522e-79	yes	Plxnb1	758.667	2759	10.397	39.614	1.92984	1.22539e-49	1.16354e-47	yes
Mcm6	92.3333	2422	4.23133	94.4367	4.48016	9.03608e-172	8.51227e-170	yes	Lsp1	128	1960.33	12.8537	158.066	3.62028	3.0815e-81	2.90768e-79	yes	Inhba	1004.67	171.667	18.0583	3.13967	-2.52398	2.06703e-49	1.95249e-47	yes
Shank1	1952.33	66	29.9073	0.863333	-5.11444	6.4198e-171	6.01632e-169	yes	Syk	76	1749	1.93233	39.1433	4.34035	4.56668e-81	4.28676e-79	yes	Mcm2	1304	364	44.1733	12.6387	-1.80533	4.93067e-49	4.6333e-47	yes
Hspa4l	4905.67	585.667	111.051	14.262	-2.96098	1.00219e-170	9.34358e-169	yes	Kif5a	23708.7	2836	505.466	53.2137	-3.24775	4.85582e-81	4.53394e-79	yes	Clec4d	1721.33	265.667	152.854	24.7093	-2.62903	2.32605e-48	2.1745e-46	yes
Ctsb	13638.7	169796	386.302	4070.11	3.39727	2.30355e-170	2.13663e-168	yes	Mmp12	7.33333	1304.33	0.67	101.661	7.24539	4.88004e-81	4.53394e-79	yes	Ank2	1614.67	5630	38.438	122.233	1.66903	2.91109e-48	2.70747e-46	yes
Hk3	25.3333	1739.67	1.11667	62.7663	5.81272	4.40832e-170	4.06803e-168	yes	Tuba4a	6934	966	441.951	57.844	-2.93365	5.41851e-81	5.00853e-79	yes	Ncapg	441.333	33.3333	13.772	1.062	-3.69688	3.15449e-48	2.91887e-46	yes
Nsg2	3812.33	282.667	229.269	14.3703	-3.99587	7.54413e-170	6.92643e-168	yes	Pnma8c	1333	170.333	35.3567	3.95367	-3.16072	7.04972e-81	6.48324e-79	yes	Adora1	553.333	1825.33	13.921	46.7233	1.74688	8.08844e-48	7.44629e-46	yes
Plcxd2	1993	137	37.669	2.199	-4.09846	1.87337e-169	1.71129e-167	yes	Tlr13	68.3333	1093.33	2.27733	31.5463	3.79205	9.95094e-81	9.10511e-79	yes	Adcy8	54	421.667	0.887667	7.105	3.00074	9.1226e-48	8.35594e-46	yes
Snap91	4748	257	148.286	7.43333	-4.31823	2.46687e-168	2.24212e-166	yes	Adarb1	3747.33	637	76.2603	11.3713	-2.74553	1.43383e-80	1.29998e-78	yes	Sfxn5	701	2243	22.366	72.597	1.6986	1.99031e-47	1.81388e-45	yes
Stmn3	6812.33	296	799.453	29.9013	-4.74073	8.48697e-168	7.67519e-166	yes	Csf3r	177.333	1958	7.403	70.272	3.24677	1.43509e-80	1.29998e-78	yes	Serping1	2844.33	13224.3	183.976	872.339	2.24537	2.34778e-47	2.12897e-45	yes
Ube2ql1	2328	91.3333	116.503	3.899	-4.90112	9.74486e-168	8.76892e-166	yes	Loxl2	139.667	2684.33	3.566	58.6693	4.04023	1.74723e-80	1.57486e-78	yes	Slc6a13	348	1981.33	17.9587	103.833	2.53151	2.6426e-47	2.38439e-45	yes
Ndrg2	16606.7	1079	1265.65	65.3563	-4.27541	1.37312e-167	1.22948e-165	yes	Mdfic	109.333	1563	5.032	61.7807	3.61795	2.21282e-80	1.98463e-78	yes	Lrg1	707	104	57.1207	8.608	-2.73026	3.1695e-47	2.83303e-45	yes
F13a1	153.333	6113.33	5.282	176.735	5.06436	2.92189e-167	2.60336e-165	yes	A2m	1274	8381	37.3517	213.131	2.51249	2.7172e-80	2.425e-78	yes	Cd83	441.667	1962.33	20.2467	92.6063	2.19343	3.17107e-47	2.83303e-45	yes
Cd300a	25.3333	1806	0.731	44.2173	5.9186	5.15467e-167	4.57022e-165	yes	Oprl1	1060	99	49.9227	4.05967	-3.62026	3.00057e-80	2.66478e-78	yes	Emp1	9251	2468.67	387.856	105.827	-1.87381	3.35042e-47	2.96445e-45	yes
C1qb	550	7713	67.8143	807.494	3.57379	6.94961e-167	6.13159e-165	yes	Gprasp2	2867	521.667	101.725	16.185	-2.65195	3.50404e-80	3.09671e-78	yes	Slc12a5	104.333	679.333	2.22933	13.2207	2.56811	3.35086e-47	2.96445e-45	yes
Ccnd1	766.333	6318.67	27.5403	192.706	2.80678	7.14554e-167	6.27385e-165	yes	Inpp5d	259.667	2715	7.677	68.283	3.15291	6.15354e-80	5.41183e-78	yes	Lgi3	561.667	2378.33	22.7643	91.686	2.00993	3.6413e-47	3.20576e-45	yes
Kcnab1	2241.67	104.333	92.6017	4.01233	-4.52852	9.65276e-167	8.43427e-165	yes	Rell2	2724.67	308	204.97	20.3387	-3.33312	9.44019e-80	8.26222e-78	yes	Adcy1	252.667	974.333	2.36367	9.323	1.97977	3.70025e-47	3.24192e-45	yes
Ank1	4947.67	154.333	86.6443	2.998	-4.85303	2.24227e-166	1.9498e-164	yes	Rasgrf2	1700.33	272.667	29.5157	4.11867	-2.84123	1.17153e-79	1.02042e-77	yes	Gabra2	219.333	1044.33	5.517	25.0447	2.18255	4.16864e-47	3.63473e-45	yes
Abcc3	45.6667	2592	1.225	58.6913	5.58229	3.65346e-166	3.16172e-164	yes	Pros1	431.333	2782.33	17.6453	98.859	2.48609	2.36735e-79	2.05212e-77	yes	Mad2l1	861.333	203	41.199	9.657	-2.09296	4.54921e-47	3.94758e-45	yes
Atcay	3205.33	240	114.893	7.339	-3.96856	4.67096e-166	4.02303e-164	yes	Spi1	90.6667	1257.33	7.90767	94.139	3.57347	2.76312e-79	2.38378e-77	yes	Nek2	405	56.6667	14.366	2.059	-2.80264	6.13654e-47	5.29964e-45	yes
Pabpc1	2028.67	12727.7	97.1117	522.39	2.42741	2.86436e-165	2.45534e-163	yes	Gngt2	25.6667	744.667	5.91467	139.688	4.56177	4.01799e-79	3.44995e-77	yes	Hmga2	457.667	25.6667	13.9603	0.819333	-4.09074	9.4587e-47	8.13e-45	yes
Mast1	2180	46.3333	63.05	1.093	-5.85013	1.73289e-164	1.47843e-162	yes	Chd5	2315.33	346	33.217	4.37967	-2.92303	5.09113e-79	4.35075e-77	yes	Faim2	371.333	1593.67	9.362	41.6093	2.15202	1.07127e-46	9.16444e-45	yes
Prepl	7877.67	846.333	335.629	32.5593	-3.36572	3.82378e-164	3.24698e-162	yes	Cd37	47.3333	799.333	4.82933	68.907	3.83475	5.79611e-79	4.92996e-77	yes	Cenpa	670.333	124.667	64.5927	12.2613	-2.39725	1.09387e-46	9.31377e-45	yes
Amph	2792.33	243	114.634	8.48733	-3.75558	3.93616e-164	3.32679e-162	yes	Camkk1	2004.67	216.667	78.2977	7.437	-3.39618	7.09846e-79	6.00947e-77	yes	Spc25	447.667	58	37.6813	5.00333	-2.91289	1.11939e-46	9.48659e-45	yes
Slc32a1	2221.33	34.3333	105.999	1.39167	-6.2511	4.96727e-164	4.17874e-162	yes	Fyb1	71.3333	1028	6.585	68.8133	3.38543	7.77133e-79	6.54852e-77	yes	Lmnb1	1199	300.667	48.3747	12.3617	-1.96838	1.81573e-46	1.53163e-44	yes
Tpx2	65	1445.33	2.42933	44.8917	4.20782	5.10125e-164	4.27159e-162	yes	Apbb1ip	113.333	1130.67	5.48767	47.765	3.12169	1.1203e-78	9.39653e-77	yes	Gabbr1	663.667	2468.67	23.3	86.05	1.88485	2.67954e-46	2.24982e-44	yes
Csf2rb	66.3333	2609	2.871	94.4147	5.03939	5.83688e-164	4.86506e-162	yes	Mmp14	440.667	4733.33	22.8767	212.812	3.21763	1.58814e-78	1.32591e-76	yes	Apoc4	56	476	11.8847	103.635	3.12434	1.06617e-45	8.91059e-44	yes
Cyba	93	3318.67	16.8393	509.959	4.92048	1.10249e-163	9.14716e-162	yes	Fes	63.3333	813.667	3.785	39.0303	3.36623	4.02496e-78	3.34496e-76	yes	Lgals1	21040.7	6963	2994.78	1022.26	-1.55068	2.10983e-45	1.75522e-43	yes
Sh3gl2	4302	93.6667	206.181	3.79267	-5.76455	1.25229e-163	1.03425e-161	yes	Ctsc	305.333	3234.67	16.028	148.612	3.21288	4.69496e-78	3.88395e-76	yes	Adgrb1	123.333	687.667	3.625	20.7573	2.51757	2.51602e-45	2.08359e-43	yes
Atf3	28	1469.33	1.908	84.8567	5.47489	1.2708e-163	1.04477e-161	yes	Sgpl1	690.667	6099.33	23.069	176.156	2.93283	5.01246e-78	4.12776e-76	yes	Mrgprf	79	536	4.35367	30.199	2.7942	3.01519e-45	2.48561e-43	yes
Nsf	13745	1679.33	489.29	52.554	-3.21882	3.71601e-163	3.04124e-161	yes	Hcls1	125.667	1332	8.36933	77.1333	3.20417	5.43983e-78	4.45943e-76	yes	Nnat	543	2494	52.4817	247.013	2.2347	3.9749e-45	3.26193e-43	yes
Tlr7	49	1562.33	1.75333	51.5827	4.87871	4.47746e-163	3.64792e-161	yes	Arl11	10.3333	680.333	0.895	53.4373	5.89982	6.30135e-78	5.14242e-76	yes	Itm2a	2154.67	6530	140.891	438.062	1.63656	4.82096e-45	3.93842e-43	yes
Ccna2	29	1596.33	1.349	61.8837	5.5196	6.82453e-163	5.53521e-161	yes	Ppic	88.6667	2238.33	8.49267	186.809	4.4592	1.26899e-77	1.03096e-75	yes	Tspan2	1234.67	4240.33	33.9747	114.879	1.75759	5.42988e-45	4.41598e-43	yes
Vstm2a	1485.67	34.3333	84.5913	1.81933	-5.53903	8.38201e-163	6.7681e-161	yes	Usp29	907.667	92.6667	21.4097	1.78867	-3.58131	1.5079e-77	1.21958e-75	yes	Emilin2	2849	836.667	99.4033	28.7683	-1.78881	6.33686e-45	5.1306e-43	yes
Siglec1	52.3333	2839.33	1.12333	51.318	5.51361	1.97572e-162	1.58821e-160	yes	Gns	1840.33	14266.7	64.5987	431.896	2.74111	1.54809e-77	1.24652e-75	yes	Tnfrsf23	918	210.667	49.1947	10.7673	-2.19184	7.06987e-45	5.69863e-43	yes
Atp8a2	3889	111.667	67.4457	1.38733	-5.60334	4.00485e-162	3.20512e-160	yes	Cd14	112	1222	9.20633	87.6963	3.25182	1.57722e-77	1.26436e-75	yes	Gda	2144.33	295	50.7247	6.67567	-2.9257	9.94116e-45	7.97756e-43	yes
Inpp5d	259.667	2896.67	7.677	71.984	3.22906	5.00422e-162	3.98728e-160	yes	Camta1	4621.33	662	103.044	15.6197	-2.72182	3.26301e-77	2.60423e-75	yes	Prdx6	5290.67	17743.3	411.766	1404.09	1.76974	1.13766e-44	9.08928e-43	yes
Rab3c	1861	51.6667	34.938	0.799333	-5.44986	1.04078e-161	8.25637e-160	yes	Caln1	2706.67	202.667	65.1457	3.38133	-4.26801	5.41515e-77	4.30291e-75	yes	Arvcf	259.667	1031.67	9.06733	35.778	1.98032	1.21411e-44	9.65754e-43	yes
Spock3	2966	115.333	135.044	4.38367	-4.94515	2.58848e-161	2.04445e-159	yes	Rnf157	6223.33	1074.33	222.044	32.2593	-2.78306	6.3275e-77	5.00591e-75	yes	Rbp4	228.667	1039.67	28.029	130.631	2.2205	1.67882e-44	1.32957e-42	yes
Cdk1	38.6667	1477.33	4.125	129.67	4.97431	2.79239e-161	2.19591e-159	yes	Ncs1	7094.67	1291.67	204.016	32.5537	-2.64779	6.36168e-77	5.01107e-75	yes	Dnm1	512.667	1926.33	16.6003	69.6077	2.06803	2.11308e-44	1.66621e-42	yes
Il1rn	14.3333	2114	0.991	145.164	7.19458	3.8535e-161	3.01724e-159	yes	Dhrs3	305.667	3023	27.111	226.067	3.0598	8.20028e-77	6.43136e-75	yes	Pink1	1322.33	4361.67	67.9673	225.8	1.73213	2.66947e-44	2.09582e-42	yes
Map7d2	4394	195	181.642	7.798	-4.54185	4.81241e-161	3.75181e-159	yes	Hpgds	42.6667	776.333	1.636	26.202	4.00143	9.38285e-77	7.32712e-75	yes	Chga	68.6667	471.333	4.143	29.4413	2.8291	4.02616e-44	3.14735e-42	yes
Lgi1	1682	101.667	63.5063	4.05033	-3.97079	8.19607e-161	6.36233e-159	yes	Tnfrsf1b	97	2035.33	3.45367	62.63	4.18065	1.00995e-76	7.85292e-75	yes	Incenp	983.333	275.333	38.3677	10.9623	-1.80734	5.74063e-44	4.46833e-42	yes
Dnajc27	3476.33	208.667	99.2427	5.442	-4.18875	1.30365e-160	1.00766e-158	yes	Nap1l5	7525.33	1234.67	563.714	81.1677	-2.79599	1.17062e-76	9.06333e-75	yes	Mmp8	617.667	40.3333	28.829	1.96333	-3.87614	6.89857e-44	5.34668e-42	yes
Syt1	2808.67	139.333	80.0667	3.34567	-4.58084	1.072e-159	8.25073e-158	yes	Mapk10	3637.67	604.333	106.846	16.2237	-2.71937	1.52877e-76	1.17859e-74	yes	Ccnf	454	63.6667	12.6017	1.80333	-2.80488	7.35405e-44	5.67545e-42	yes
Snph	2850	105	133.75	4.041	-5.04869	1.31723e-159	1.00952e-157	yes	Hspa4l	4905.67	854	111.051	18.7543	-2.56593	2.48889e-76	1.91065e-74	yes	Rab3a	293.667	1183.67	24.6057	100.99	2.03715	1.37816e-43	1.05908e-41	yes
Hpse	21.3333	1705.33	0.925	62.6097	6.08079	5.29219e-159	4.03881e-157	yes	Calb2	3317.67	310.333	308.587	25.4753	-3.59851	3.11188e-76	2.37882e-74	yes	Asf1b	410.333	63	26.2503	4.135	-2.66638	1.51497e-43	1.1593e-41	yes
Ccnb1	20	1395.33	1.10767	65.8403	5.89338	1.89428e-158	1.43957e-156	yes	Kcnc3	8586.33	519.667	232.013	13.2213	-4.13327	3.37486e-76	2.569e-74	yes	Mapk8ip2	167	847.333	3.432	17.9363	2.38576	1.86837e-43	1.41792e-41	yes
Bcl2a1b	31.6667	2030	5.243	281.659	5.74741	2.15049e-158	1.62744e-156	yes	Cxcr4	59	966.333	6.29333	84.245	3.74269	4.46015e-76	3.38095e-74	yes	Itih5	1965	8558	28.6317	126.678	2.14549	1.86857e-43	1.41792e-41	yes
Rbfox3	1439.33	27.3333	86.253	1.44633	-5.8981	4.86542e-158	3.6667e-156	yes	Mapk8ip2	5254.33	847.333	126.69	17.9363	-2.82035	5.84346e-76	4.41108e-74	yes	Ptn	2119	6300	150.849	457.491	1.60064	2.2103e-43	1.67025e-41	yes
Lgals1	1079.33	21040.7	181.031	2994.78	4.04814	7.60071e-158	5.70432e-156	yes	Mylip	149.667	1701.67	6.61667	65.278	3.30242	6.40368e-76	4.81392e-74	yes	Ldha	15965	5942.33	1152.24	438.787	-1.39285	2.26543e-43	1.70481e-41	yes
Rell2	2724.67	48.6667	204.97	3.20667	-5.99819	9.74817e-158	7.28575e-156	yes	Serpini1	1468	193	50.6963	5.69667	-3.15369	1.34475e-75	1.00673e-73	yes	Apoe	119623	482364	9779.44	40467.6	2.04895	2.29336e-43	1.7187e-41	yes
Diras2	1969.33	90.3333	55.2993	2.13833	-4.6927	1.00457e-157	7.47725e-156	yes	Hk3	25.3333	821.667	1.11667	29.958	4.74567	2.76818e-75	2.06383e-73	yes	Kcnc3	50	519.667	1.389	13.2213	3.25075	2.45044e-43	1.82885e-41	yes
Atp2b3	1775.33	15.6667	52.3077	0.407333	-7.00467	1.58645e-157	1.17599e-155	yes	Tmem106a	41.6667	1122.67	3.174	70.7413	4.47818	3.44557e-75	2.55834e-73	yes	Slc16a3	1383.33	330.333	90.667	21.0817	-2.10459	3.1538e-43	2.34415e-41	yes
Hexa	1025.33	10637	69.2003	607.219	3.13337	1.79591e-157	1.32582e-155	yes	Ptprn2	1923.67	356.667	79.3097	12.7997	-2.63139	5.93679e-75	4.39008e-73	yes	Ecel1	104	890.333	4.234	36.3663	3.10251	5.21748e-43	3.86221e-41	yes
Rasgrf1	7951.67	175	265.047	5.46533	-5.59979	2.83436e-157	2.08394e-155	yes	Marcks	1890.33	8031.67	62.9447	232.502	1.88509	8.32049e-75	6.12774e-73	yes	Cpq	652.667	2434.67	39.16	148.581	1.9238	5.52988e-43	4.07682e-41	yes
Cotl1	1033.67	9765.67	87.029	697.8	3.00324	3.75113e-156	2.74683e-154	yes	Phyhip	1749.33	200	83.117	8.25033	-3.33262	8.43214e-75	6.18482e-73	yes	Adgrl4	1427	384.333	56.2753	15.8373	-1.82917	8.85207e-43	6.49964e-41	yes
Ckap4	378.667	3555	16.4543	131.67	3.00039	9.99376e-156	7.28859e-154	yes	Shank1	1952.33	278	29.9073	3.61167	-3.04976	8.87804e-75	6.48563e-73	yes	Cyp4f14	15.3333	267.333	0.890667	15.8547	4.15388	1.08852e-42	7.96027e-41	yes
Klc2	5103.67	429.333	219.362	15.901	-3.78613	1.01767e-155	7.3922e-154	yes	Rab3a	7450.67	1183.67	723.928	100.99	-2.84163	9.84382e-75	7.16227e-73	yes	Serpind1	246	1444.67	13.683	81.9397	2.58218	1.2306e-42	8.96309e-41	yes
Galns	94.6667	1691.33	5.00733	76.464	3.93267	2.24463e-155	1.62394e-153	yes	Cebpa	133	1220	6.791	54.3977	3.00185	1.47026e-74	1.06547e-72	yes	Lyve1	539.667	59.3333	21.495	2.42467	-3.14814	2.06016e-42	1.49453e-40	yes
Arhgap44	2757.67	164	98.2357	4.909	-4.32275	3.77273e-155	2.71862e-153	yes	Gabra5	757	55.6667	40.5097	2.587	-3.96891	2.08827e-74	1.5073e-72	yes	Smim45	94.3333	573	6.94633	43.2543	2.63852	2.10683e-42	1.52229e-40	yes
Edem1	437.333	4372.67	10.0943	86.091	3.09232	7.25867e-155	5.20983e-153	yes	Dock2	136.333	1719.67	2.87233	31.3083	3.44625	3.46194e-74	2.48889e-72	yes	Lrrc15	274	13	5.895	0.287	-4.36037	2.19741e-42	1.58144e-40	yes
Kcna2	7593.33	346.333	88.4373	3.49067	-4.66308	1.0413e-154	7.44428e-153	yes	Rac2	108.333	1487.67	5.40933	70.5053	3.70421	6.11449e-74	4.37851e-72	yes	Pimreg	460.333	66	35.6033	5.162	-2.78601	2.5101e-42	1.79934e-40	yes
Pclo	2500	146.667	24.1863	1.277	-4.24336	1.95897e-154	1.39496e-152	yes	Tmem176b	825.667	4730.33	93.0103	466.639	2.32685	6.25693e-74	4.46286e-72	yes	Omd	41	365.333	3.02667	26.6883	3.14041	4.57767e-42	3.26853e-40	yes
Panx2	1894.67	24	83.1323	0.817333	-6.66834	2.85507e-154	2.02509e-152	yes	Steap4	33.6667	1277.33	1.44233	47.5507	5.04299	6.64951e-74	4.72428e-72	yes	Zcchc18	236.333	942.333	12.0433	49.5387	2.04032	5.08215e-42	3.61451e-40	yes
Negr1	1669.33	114.333	45.3613	2.66133	-4.09124	3.02034e-154	2.13394e-152	yes	Plcxd2	1993	218	37.669	3.607	-3.38451	6.87888e-74	4.86815e-72	yes	Septin3	337.333	1247.67	12.8203	49.7217	1.95544	5.68803e-42	4.02962e-40	yes
Rab6b	10079.3	678.667	272.122	15.7317	-4.11251	5.34452e-154	3.76134e-152	yes	Ncf4	35	781	3.302	65.009	4.29923	1.43601e-73	1.0123e-71	yes	Cd93	6507	1335.33	111.138	23.3543	-2.25059	6.62236e-42	4.67327e-40	yes
Lyn	166.667	2349.33	6.53533	78.3223	3.58309	3.27171e-153	2.29362e-151	yes	Ugt1a7c	10.3333	679.333	0.535	32.7767	5.93699	2.64531e-73	1.85756e-71	yes	Slc38a3	330.333	1465.67	15.4647	70.272	2.18397	6.8168e-42	4.79184e-40	yes
Nrsn2	1747.33	33	161.352	2.54967	-5.98376	3.7305e-153	2.60515e-151	yes	Cpxm1	178	3271	10.1353	161.292	3.99221	3.87446e-73	2.71018e-71	yes	Atad2	926	233	18.6763	4.882	-1.93567	7.50164e-42	5.25289e-40	yes
Sgk1	623.333	6567.67	35.412	422.063	3.57515	8.21504e-153	5.71482e-151	yes	Ncf1	193.333	2126.33	9.51067	90.9517	3.25748	4.22348e-73	2.94295e-71	yes	Pm20d1	40.6667	346	0.936333	7.58467	3.01799	7.92416e-42	5.52741e-40	yes
Sphkap	1334	57.6667	27.1113	1.00033	-4.76034	1.30175e-152	9.02096e-151	yes	Fam163b	910	81.6667	41.5383	3.25733	-3.67268	4.36468e-73	3.02969e-71	yes	Steap4	121.667	1277.33	4.41767	47.5507	3.42811	8.80828e-42	6.12057e-40	yes
Myo1f	120	2290.67	4.218	68.2163	4.01549	1.31632e-152	9.08711e-151	yes	Pabpc1	2028.67	8239	97.1117	346.87	1.83668	5.63315e-73	3.89526e-71	yes	Pacsin1	123	704	4.23233	22.9933	2.44169	1.07796e-41	7.46178e-40	yes
Syt7	2142.67	109.333	68.4823	2.70767	-4.66061	2.44086e-152	1.67862e-150	yes	Arhgap30	73.6667	1042.67	2.22133	27.082	3.60784	6.34535e-73	4.37106e-71	yes	Ccl7	814	147.333	116.033	21.5413	-2.42936	1.21392e-41	8.37098e-40	yes
Dock3	2415.67	169	53.8583	5.03333	-3.41958	6.93908e-152	4.75406e-150	yes	S100a4	48	1302	12.993	305.086	4.55341	9.87091e-73	6.77391e-71	yes	Fam180a	319.667	1505	22.786	110.145	2.27318	1.66986e-41	1.14714e-39	yes
Fcgr3	167	3812.33	16.8507	322.898	4.2602	1.01407e-151	6.92131e-150	yes	Fblim1	43.6667	918.667	2.632	44.1673	4.06875	1.33105e-72	9.09984e-71	yes	Shcbp1	298.333	30.6667	15.7767	1.665	-3.2442	2.00287e-41	1.37072e-39	yes
Nes	357.667	5573.33	8.011	106.47	3.73233	1.25336e-151	8.5224e-150	yes	Anxa3	280.333	2763.67	23.708	204.799	3.11076	1.97449e-72	1.3448e-70	yes	Ctla2a	1526	365.667	148.876	35.8163	-2.05542	2.65626e-41	1.81105e-39	yes
Rit2	1580	45.3333	115.092	2.82533	-5.34822	1.66286e-151	1.12645e-149	yes	Kcnab3	1583.33	125.333	83.0657	5.82067	-3.835	2.06273e-72	1.39964e-70	yes	Astn1	560.333	2112.33	8.99333	34.443	1.93728	3.73479e-41	2.53686e-39	yes
Lsp1	128	2548	12.8537	199.255	3.95436	3.19736e-151	2.15786e-149	yes	Irf5	76.3333	913	4.71267	49.2933	3.38678	2.47911e-72	1.6759e-70	yes	Mt3	384.333	1997.33	82.2213	442.253	2.42729	5.59706e-41	3.78762e-39	yes
Gad2	1812.67	51.3333	42.5947	1.00767	-5.40158	4.03771e-151	2.71487e-149	yes	Gpx3	598.333	3553.33	50.3303	260.69	2.37284	2.60745e-72	1.75611e-70	yes	Pamr1	171.667	1002.33	6.826	40.857	2.58147	5.83096e-41	3.93124e-39	yes
Uhrf1	34.6667	1343	1.32133	44.3037	5.06736	1.17604e-150	7.87818e-149	yes	Kcnc2	949	93.3333	28.9217	2.34067	-3.62716	2.99327e-72	2.00848e-70	yes	Kif22	544	88.3333	29.3317	4.869	-2.59076	6.00678e-41	4.03478e-39	yes
Chd5	2315.33	74.3333	33.217	0.909	-5.1915	1.9043e-150	1.27096e-148	yes	Tm4sf1	343.333	2364	30.9017	181.223	2.55201	8.02807e-72	5.36696e-70	yes	Des	492.333	88	18.567	3.396	-2.45083	6.08118e-41	4.06968e-39	yes
Cdk5r2	1242	45.3333	59.6127	1.85033	-5.00976	8.75568e-150	5.82221e-148	yes	Olfm3	685.667	44	22.099	1.419	-3.96103	9.38764e-72	6.25279e-70	yes	Clstn3	178.333	916	5.367	27.0553	2.33373	6.35089e-41	4.23455e-39	yes
Cfp	42	2043.33	3.455	141.773	5.35875	1.07172e-149	7.10045e-148	yes	Grm1	650.667	49.6667	13.0777	0.878333	-3.89619	9.55376e-72	6.34013e-70	yes	Scn4b	61	525.667	1.41333	12.46	3.14013	6.68062e-41	4.43809e-39	yes
Mmp14	440.667	5107.67	22.8767	224.419	3.29425	1.67277e-148	1.10421e-146	yes	Ptpn6	132.333	1657.33	8.225	87.8393	3.41678	1.17442e-71	7.76529e-70	yes	S100a1	1012.33	2850	170.997	494.389	1.53168	6.94694e-41	4.59817e-39	yes
Rcan2	4853.67	574.667	208.99	23.1893	-3.1719	2.37575e-148	1.56255e-146	yes	Fcer1g	67.3333	1187.67	13.507	206.622	3.93521	1.20665e-71	7.94939e-70	yes	Enpp5	648.333	1880.33	27.8107	82.8317	1.57454	7.09864e-41	4.68149e-39	yes
Pygm	2726	183	127.23	7.32833	-4.11781	5.8128e-148	3.80928e-146	yes	Rap1gap2	2217.67	416.667	52.397	8.98133	-2.54448	2.17383e-71	1.42693e-69	yes	Ctsl	65116	19619.7	4211.43	1314.12	-1.68022	8.05322e-41	5.29178e-39	yes
Ncf1	193.333	2820.67	9.51067	118.287	3.63661	6.05413e-148	3.95311e-146	yes	Plaur	16	513	1.44333	39.9457	4.79056	2.35771e-71	1.54205e-69	yes	Scd2	21000.7	48356.7	440.515	1038.44	1.23716	1.23582e-40	8.0913e-39	yes
Elmod1	1861	44	95.952	1.90067	-5.65774	8.65577e-148	5.63154e-146	yes	Fcgr1	27.6667	686.667	1.66767	36.0203	4.43291	3.30252e-71	2.15222e-69	yes	Hdac11	379.333	1502.33	16.2657	66.5063	2.03166	1.45437e-40	9.48793e-39	yes
Rims1	1159.33	31	28.3253	0.652333	-5.44034	1.06727e-147	6.91889e-146	yes	Cacng2	1131	103.667	27.481	2.20233	-3.64133	4.0689e-71	2.64216e-69	yes	Cenpe	490.333	65.6667	7.68467	0.979333	-2.97211	2.35959e-40	1.53382e-38	yes
Gabrb3	2049	133	49.6393	2.77333	-4.16179	1.53922e-147	9.94283e-146	yes	Camk2n1	3903.67	651.333	118.176	17.2427	-2.77688	8.53626e-71	5.52326e-69	yes	Cldn10	20.3333	303.667	1.32467	20.3943	3.94447	3.21724e-40	2.08385e-38	yes
Csf2rb2	48	1794.67	1.609	43.6253	4.76093	8.66816e-147	5.57939e-145	yes	Pacsin1	5293.33	704	195.199	22.9933	-3.08566	1.23277e-70	7.9481e-69	yes	Scg5	313.333	1421.33	29.5337	138.369	2.22809	4.3092e-40	2.7812e-38	yes
Pik3ap1	104	1745.33	3.12367	44.5817	3.83514	1.21064e-146	7.76481e-145	yes	Ddx25	1022.33	118.667	19.754	2.013	-3.29473	1.51089e-70	9.7067e-69	yes	Ctnnd2	267.667	1168	6.24667	29.7633	2.25238	5.13781e-40	3.30423e-38	yes
Chgb	3650.33	80.3333	179.11	3.29233	-5.76559	1.56233e-146	9.9851e-145	yes	Otulinl	108	1243.33	7.19233	92.1973	3.68019	1.56256e-70	1.00031e-68	yes	Tspyl4	623	1827	18.342	55.3613	1.59373	5.63189e-40	3.60918e-38	yes
Slc7a14	2620.67	191.667	39.834	2.51633	-3.98461	2.97164e-146	1.89254e-144	yes	Mpped1	950.667	101.667	40.2003	3.65333	-3.45992	2.84838e-70	1.81704e-68	yes	Pdia6	8521.33	3344	457.343	183.084	-1.32077	6.16457e-40	3.93664e-38	yes
Htr2c	1713	22.3333	48.537	0.535	-6.5034	1.14785e-145	7.28459e-144	yes	Sptbn2	3537.67	605.333	59.1773	8.54967	-2.7911	4.37239e-70	2.77946e-68	yes	Ran	6092.33	2624	292.574	129.36	-1.17741	6.20726e-40	3.95e-38	yes
Ucp2	1154	12712.7	83.9147	773.168	3.20379	2.69599e-145	1.70498e-143	yes	Ccdc80	229.333	2204.33	8.381	68.9983	3.04137	4.69327e-70	2.973e-68	yes	Cdca2	295	33.6667	10.9347	1.17767	-3.21491	7.23906e-40	4.59047e-38	yes
Myof	211	6598.67	5.29433	116.293	4.45717	2.92527e-145	1.84353e-143	yes	Col16a1	322.333	3796.33	10.2517	104.332	3.34726	4.9281e-70	3.11088e-68	yes	Hlf	228.667	844.667	4.64933	18.315	1.97793	8.7674e-40	5.54027e-38	yes
Kcnma1	1431.67	78.3333	18.6937	1.28167	-3.86646	4.19776e-145	2.63628e-143	yes	Slc37a2	27	744	0.884667	20.7633	4.55276	6.37718e-70	4.01164e-68	yes	Dzank1	93.3333	493.333	1.55633	8.46833	2.44393	1.13963e-39	7.17653e-38	yes
Add2	3768	328.667	63.3107	5.86067	-3.43331	8.17466e-145	5.11609e-143	yes	Cnr1	874	98	20.365	1.98333	-3.36009	6.90798e-70	4.33051e-68	yes	Prx	1367.33	4048.33	32.7593	100.04	1.6106	1.66674e-39	1.04595e-37	yes
Tmem151b	1256.67	39	34.863	0.921333	-5.24183	1.58864e-144	9.90818e-143	yes	Pik3r5	57.6667	1007	1.773	26.8167	3.91887	9.93569e-70	6.20706e-68	yes	C1qtnf3	102	711.333	5.04833	36.428	2.85117	1.78164e-39	1.1142e-37	yes
Pik3r5	57.6667	1265.67	1.773	33.14	4.22431	1.84142e-144	1.14453e-142	yes	Cst7	7	1026.33	0.967667	121.293	6.96977	1.09464e-69	6.81496e-68	yes	Sorl1	1029.33	3062.67	11.0183	33.429	1.60119	2.73752e-39	1.70611e-37	yes
Cabp7	2935.67	46.3333	148.294	2.013	-6.20297	7.40102e-144	4.58433e-142	yes	Kcna2	7593.33	1398	88.4373	14.343	-2.62431	1.24109e-69	7.70027e-68	yes	Kif14	257	22.3333	4.17	2.05033	-1.02419	3.49122e-39	2.16838e-37	yes
Spock1	5070	299	169.702	10.164	-4.06147	2.59467e-143	1.6017e-141	yes	Mmp3	3	2286.33	0.228333	149.267	9.35254	1.266e-69	7.82806e-68	yes	Cks2	426.333	68	70.519	11.4667	-2.62057	4.05955e-39	2.51276e-37	yes
Psd2	1339.67	64.6667	39.928	1.62833	-4.61593	4.64052e-143	2.85487e-141	yes	Nfam1	108.333	1159	3.72067	36.0517	3.27643	1.45874e-69	8.9891e-68	yes	Nebl	521.333	1502	10.526	30.8453	1.55109	4.35652e-39	2.68741e-37	yes
Ppp2r2b	1730.33	123	109.366	6.753	-4.01749	4.97687e-143	3.05141e-141	yes	Zfp612	1252.33	153	35.7683	3.74967	-3.25385	1.64039e-69	1.00742e-67	yes	Tmie	9.66667	228	0.397333	9.52967	4.584	5.67892e-39	3.49128e-37	yes
Bsn	2397	174	26.6417	1.89767	-3.81139	5.51075e-143	3.36733e-141	yes	Ifi30	100.667	1675	13.8967	199.489	3.8435	1.70091e-69	1.04106e-67	yes	Ppp1r3c	309.333	1375.67	12.8947	58.9287	2.1922	5.89181e-39	3.60993e-37	yes
Syt3	1256	25.3333	75.9563	1.181	-6.00709	1.58245e-142	9.63695e-141	yes	Rab32	59.3333	817.333	3.751	45.0073	3.58481	2.11382e-69	1.28943e-67	yes	Cmtm5	404.667	1340.67	42.31	143.489	1.76187	6.34709e-39	3.87579e-37	yes
Rbfox1	1606	96.3333	73.8897	3.84933	-4.26269	1.87791e-142	1.13979e-140	yes	Rnf227	1688	218	137.985	14.096	-3.29115	2.1579e-69	1.3119e-67	yes	Slco1a4	123	627.667	5.945	27.3613	2.20239	8.57363e-39	5.21783e-37	yes
Susd4	1642.67	78.3333	78.8693	3.20467	-4.62122	4.04903e-142	2.44932e-140	yes	Jph3	2239.67	323.333	82.8503	10.5053	-2.97939	2.77944e-69	1.68412e-67	yes	Nap1l5	302	1234.67	18.8523	81.1677	2.10616	1.12566e-38	6.82773e-37	yes
Paqr9	1157	37.6667	18.6053	0.511333	-5.18531	5.30601e-142	3.19899e-140	yes	Atcay	3205.33	551	114.893	17.3323	-2.72875	2.98762e-69	1.80422e-67	yes	Bdh1	233.667	918.667	11.3137	46.7233	2.04608	1.41816e-38	8.55018e-37	yes
Enpp5	4612.67	648.333	218.661	27.8107	-2.97498	5.68315e-142	3.41499e-140	yes	Nptx1	2603	289.333	67.12	6.55133	-3.35688	3.1394e-69	1.88958e-67	yes	Slc22a8	147.333	779	4.94067	26.6237	2.42993	1.41906e-38	8.55018e-37	yes
Hdac11	3567.67	379.333	181.083	16.2657	-3.47675	6.43603e-142	3.85458e-140	yes	Pcp4l1	3626.67	714.667	308.511	53.2857	-2.5335	3.41679e-69	2.04973e-67	yes	Ckmt1	94.3333	562.333	6.743	41.068	2.60655	1.47007e-38	8.82818e-37	yes
Tmem229a	2518.33	220.333	65.4703	4.88867	-3.74333	1.35656e-140	8.09773e-139	yes	Lhfpl2	698.667	4468	22.0363	123.968	2.49201	3.46779e-69	2.07347e-67	yes	Plek	13061.7	4633	363.839	133.237	-1.44931	1.96765e-38	1.17773e-36	yes
Ap3b2	2387	197.667	84.0167	5.97967	-3.81254	2.14951e-140	1.27889e-138	yes	Pclo	2500	367	24.1863	3.49933	-2.78904	4.92171e-69	2.93311e-67	yes	Mcm4	1208.67	391.333	39.551	13.2613	-1.57649	2.23043e-38	1.33063e-36	yes
Hk2	74.3333	1320.67	1.82567	27.4343	3.90949	3.14541e-140	1.86528e-138	yes	Serpina3n	1813.67	9680.33	117.893	548.145	2.21707	6.57412e-69	3.90502e-67	yes	C1s1	211.333	1737	8.44567	69.8853	3.04871	2.29772e-38	1.36628e-36	yes
Lhfpl2	698.667	5918.67	22.0363	160.873	2.86797	5.96697e-140	3.52695e-138	yes	Vav1	97	1320.67	4.438	52.4417	3.56273	1.64241e-68	9.72405e-67	yes	Tmem163	57	387.667	2.44433	17.0163	2.79941	2.45253e-38	1.45356e-36	yes
Kcnh2	1774.67	107	65.4183	3.37033	-4.27873	9.97751e-140	5.87828e-138	yes	Fermt3	95	1201	4.941	54.2203	3.45596	1.65692e-68	9.77797e-67	yes	Ckap2	661	122	29.0023	5.544	-2.38717	3.25792e-38	1.92461e-36	yes
Trim37	5885	783.667	145.662	16.691	-3.12548	1.35291e-139	7.94486e-138	yes	Serpinb1b	1112.33	106	89.187	7.67067	-3.53941	1.76514e-68	1.03828e-66	yes	Igfbp3	11547.3	2056.33	542.685	99.1173	-2.45291	3.59927e-38	2.11936e-36	yes
Tgfb1	150	2423.33	9.724	127.229	3.70973	1.3936e-139	8.15728e-138	yes	Rgs17	1547	197	25.6703	2.90267	-3.14465	1.93143e-68	1.13242e-66	yes	Syn1	264	1143.33	9.32033	41.555	2.15657	3.65118e-38	2.14297e-36	yes
Emp1	293.333	9251	14.5883	387.856	4.73264	1.43506e-139	8.37285e-138	yes	Sv2c	8592.33	1266	126.372	16.4017	-2.94577	2.19473e-68	1.28265e-66	yes	Slc41a1	1037.33	3422	25.2177	85.089	1.75454	3.81382e-38	2.23121e-36	yes
Rab32	59.3333	1591.33	3.751	85.4323	4.50944	2.51151e-139	1.46064e-137	yes	Ncdn	13620	2499.33	538.182	80.9583	-2.73284	2.92546e-68	1.7042e-66	yes	C2	248.667	2061	11.634	93.61	3.00832	4.06821e-38	2.37238e-36	yes
Sv2a	6487.67	833.333	200.839	21.9583	-3.1932	7.26805e-139	4.21337e-137	yes	Arhgap44	2757.67	447.333	98.2357	14.0833	-2.80226	3.43432e-68	1.99422e-66	yes	Olfml1	147.333	807	11.3183	60.4057	2.41602	5.07739e-38	2.9514e-36	yes
Dlg2	2325.33	269.667	49.073	4.61067	-3.41188	1.0782e-138	6.23049e-137	yes	Ccdc184	867.333	96.6667	39.1997	3.798	-3.36753	5.75027e-68	3.32836e-66	yes	Entrep1	140.333	641.333	6.25867	29.527	2.23811	5.85135e-38	3.39042e-36	yes
Soat1	692.667	5327.33	19.4143	200.795	3.37053	3.65331e-138	2.10438e-136	yes	Syt3	1256	166	75.9563	8.45033	-3.16809	6.64459e-68	3.83376e-66	yes	Itga5	4132.67	1209.67	107.765	32.2343	-1.74121	6.41612e-38	3.70582e-36	yes
Rac2	108.333	1915	5.40933	81.4273	3.91199	6.14981e-138	3.53116e-136	yes	Gabrg2	1819.67	220	81.557	8.43933	-3.27261	7.2874e-68	4.19129e-66	yes	Tyms	642.667	122.667	63.5307	10.6703	-2.57385	6.58115e-38	3.78907e-36	yes
Ctsl	2648.67	65116	202.159	4211.43	4.38075	8.90865e-138	5.09907e-136	yes	Col4a2	821	10841.7	17.0933	195.626	3.51659	7.49749e-68	4.29848e-66	yes	Slc38a1	1631	4087.67	28.3703	71.084	1.32514	7.15503e-38	4.10644e-36	yes
Ccl6	93.3333	6550.33	8.79267	511.904	5.86343	9.31001e-138	5.31199e-136	yes	Unc13c	1562.67	211.333	24.358	2.83567	-3.10264	1.3584e-67	7.76343e-66	yes	Pcna	3782.33	1445.67	284.632	111.7	-1.34946	9.66229e-38	5.52793e-36	yes
Serpini1	1468	69.3333	50.6963	2.33533	-4.44018	3.55906e-137	2.0243e-135	yes	Fgr	26.3333	585.333	1.15567	23.8067	4.36457	1.48682e-67	8.47065e-66	yes	Igfbpl1	6.66667	231.333	0.261333	9.457	5.17742	1.26145e-37	7.19425e-36	yes
Trpm3	2087.67	178.333	33.4523	2.60867	-3.68072	4.59957e-137	2.60791e-135	yes	Syn2	4128	732.667	158.931	25.7907	-2.62348	2.60799e-67	1.48116e-65	yes	Bcat1	2307	881.667	119.241	45.3313	-1.3953	1.47961e-37	8.41199e-36	yes
Rgs7bp	2623.33	256	50.0023	4.13133	-3.59732	6.28296e-137	3.55125e-135	yes	Pnma8a	1165.33	108	38.3583	3.091	-3.63339	6.76341e-67	3.82915e-65	yes	Aebp1	4192.67	18095	132.792	603.763	2.18481	1.49735e-37	8.48624e-36	yes
Csrnp3	1216.67	69.6667	16.497	0.812	-4.34458	3.12853e-136	1.7628e-134	yes	Col4a1	1180.33	17301.7	32.1933	373.281	3.53543	8.39195e-67	4.73636e-65	yes	Cep55	325.333	26.3333	15.277	1.31733	-3.53567	1.51125e-37	8.5383e-36	yes
Tlcd3b	1512.33	33.6667	87.6193	1.721	-5.66993	1.63447e-135	9.18095e-134	yes	Csf2rb	66.3333	1539	2.871	48.4433	4.07667	1.07215e-66	6.03233e-65	yes	Snph	105	600	4.041	20.8963	2.37047	1.69522e-37	9.54797e-36	yes
Nrsn1	2863.67	91.3333	174.803	4.63633	-5.2366	2.34295e-135	1.31198e-133	yes	Ch25h	16	680	1.584	57.9627	5.19348	1.14234e-66	6.40737e-65	yes	Eno2	963.333	2821	43.8927	129.564	1.56161	1.9281e-37	1.0826e-35	yes
St8sia3	1236.33	45.6667	19.4487	0.689	-4.81902	3.67961e-135	2.05411e-133	yes	Pon3	82.3333	802.333	6.10867	55.0197	3.17102	1.37529e-66	7.69017e-65	yes	Kcna6	582.667	1875	11.7887	37.7073	1.67744	1.95818e-37	1.09609e-35	yes
Jph4	1524.67	68.3333	49.705	1.82233	-4.76953	4.26431e-135	2.37319e-133	yes	Tubb6	107.667	965	8.28833	64.2887	2.95541	1.40541e-66	7.83442e-65	yes	Tagln	3929	1298.33	284.335	96.039	-1.5659	2.17717e-37	1.21493e-35	yes
Ly9	15.3333	1462.33	0.871333	68.3327	6.29321	5.43385e-135	3.01478e-133	yes	Sh3bp2	92	910	4.263	37.25	3.1273	1.68797e-66	9.38065e-65	yes	Ccr1	1782.67	365	71.8843	15.008	-2.25995	2.43768e-37	1.35613e-35	yes
Gabra2	2464.67	219.333	69.1903	5.517	-3.64861	7.33795e-135	4.05876e-133	yes	Fnip2	224.333	1690	4.496	31.4807	2.80775	2.61292e-66	1.44765e-64	yes	Slc24a3	315.333	1157	9.36133	34.053	1.863	3.0175e-37	1.67356e-35	yes
Ncs1	7094.67	766.333	204.016	18.834	-3.43727	7.72408e-135	4.25931e-133	yes	Negr1	1669.33	323	45.3613	7.926	-2.5168	3.05749e-66	1.68879e-64	yes	Adamts20	53.6667	340	0.978	6.23567	2.67264	5.75132e-37	3.18006e-35	yes
Elavl4	1334.67	46.3333	51.005	1.697	-4.90958	8.47535e-135	4.65938e-133	yes	Pik3ap1	104	1519	3.12367	39.34	3.65468	3.65595e-66	2.01321e-64	yes	Gtse1	336.667	41.3333	14.5077	1.82567	-2.99032	6.0588e-37	3.33989e-35	yes
Myt1l	1082	40.6667	27.7013	0.758	-5.19161	1.21172e-134	6.6413e-133	yes	Hk2	74.3333	868	1.82567	18.3647	3.33044	3.85531e-66	2.11226e-64	yes	Gprc5b	1670	4626.67	42.0833	122.109	1.53685	8.24678e-37	4.53223e-35	yes
Cd109	123.667	2345.67	2.85433	45.6493	3.99937	1.62588e-134	8.88437e-133	yes	P2rx4	291.667	2367.33	23.229	164.267	2.82204	3.85913e-66	2.11226e-64	yes	Tmem255a	197.667	854.667	6.69233	30.106	2.16947	8.71205e-37	4.77347e-35	yes
Phyhip	1749.33	36.6667	83.117	1.458	-5.83308	1.63997e-134	8.93439e-133	yes	Ube2ql1	2328	390.333	116.503	17.16	-2.76325	5.95765e-66	3.25104e-64	yes	Nxpe5	347	18.6667	15.36	0.847	-4.18067	9.48581e-37	5.18176e-35	yes
Micu3	1335.67	101.333	75.3283	4.83367	-3.962	3.88745e-134	2.11148e-132	yes	Celf4	1786	278	75.355	9.741	-2.95156	6.00255e-66	3.26571e-64	yes	Gpr162	95.3333	486.333	4.03033	21.2363	2.39756	1.05104e-36	5.72423e-35	yes
Ctss	2069	31140.7	204.406	2637.35	3.68958	6.0164e-134	3.25805e-132	yes	Pnma8b	5272.67	1003.67	170.674	28.312	-2.59176	7.18928e-66	3.89965e-64	yes	Lig1	1092	363.333	42.6097	14.493	-1.55582	1.36916e-36	7.43444e-35	yes
Kif20a	22	1094	0.882333	38.33	5.44101	6.16919e-134	3.33081e-132	yes	Serpine1	31	604	1.38667	23.411	4.07749	1.06601e-65	5.76503e-64	yes	Rarres2	270.333	981.667	41.3233	153.65	1.89462	1.54684e-36	8.37418e-35	yes
Gns	1840.33	12913.7	64.5987	382.475	2.56579	8.25755e-134	4.44507e-132	yes	Camkv	965.667	96	39.8133	3.44233	-3.53179	1.37573e-65	7.41791e-64	yes	Grin1	65.6667	457.667	1.89133	13.7463	2.86157	1.69016e-36	9.12284e-35	yes
Gpr158	1579	81.3333	29.7147	1.28733	-4.52872	8.44656e-134	4.53332e-132	yes	Ppp1r18	204	1466.67	12.1913	79.0477	2.69687	2.02976e-65	1.09119e-63	yes	Mamdc2	114.333	500.333	3.85767	17.2203	2.15831	1.79805e-36	9.6764e-35	yes
Tnfrsf1b	97	2348.33	3.45367	70.0677	4.34255	1.88794e-133	1.01027e-131	yes	Tlcd3b	1512.33	168.333	87.6193	8.79867	-3.31589	2.10883e-65	1.13035e-63	yes	Slc25a23	738.667	2159.33	27.2323	79.626	1.54792	2.22626e-36	1.19454e-34	yes
Cnnm1	1211.67	21.6667	35.6427	0.527	-6.07966	2.16595e-133	1.15562e-131	yes	Golga7b	1201.33	155	57.0657	6.448	-3.1457	2.5334e-65	1.35391e-63	yes	Abi3bp	118.667	710.333	2.94333	18.8853	2.68174	2.26846e-36	1.21359e-34	yes
Bmerb1	3280	429.333	185.477	20.51	-3.17684	2.87075e-133	1.52716e-131	yes	Brsk1	5360	988	242.224	40.3093	-2.58715	2.91571e-65	1.55365e-63	yes	Mmp10	300.667	12.3333	20.211	0.841333	-4.58632	2.32382e-36	1.23955e-34	yes
Actn1	366.333	3638.67	15.6167	126.169	3.0142	4.03191e-133	2.13857e-131	yes	Pak3	1956.33	379.667	43.5387	6.384	-2.76976	3.0124e-65	1.60046e-63	yes	Scn1a	39.3333	330.333	0.637667	4.80567	2.91386	2.36591e-36	1.2583e-34	yes
Vcan	543	4424	10.125	58.4383	2.52899	6.19215e-133	3.27478e-131	yes	Tgfbr1	565.667	3416	14.866	73.867	2.31291	3.03186e-65	1.60609e-63	yes	Slc16a2	562.667	1981.67	15.4847	55.6697	1.84605	2.41003e-36	1.27802e-34	yes
Cadm3	5846	630.667	226.078	22.4713	-3.33066	8.79041e-133	4.63534e-131	yes	Lgals1	1079.33	6963	181.031	1022.26	2.49745	3.27727e-65	1.73103e-63	yes	Ptprn2	54.6667	356.667	1.87067	12.7997	2.77448	2.46799e-36	1.30494e-34	yes
Asb13	1548	135.667	46.71	3.47533	-3.74851	8.84726e-133	4.65176e-131	yes	Scn2b	1937.33	322	56.1513	8.08533	-2.79594	3.35385e-65	1.76633e-63	yes	Hhatl	33.3333	327	2.686	23.1497	3.10746	2.85987e-36	1.50775e-34	yes
Kcng4	1634.33	13.6667	57.3543	0.416667	-7.10486	1.20459e-132	6.3152e-131	yes	Pnkd	6285	1034.67	326.762	81.2387	-2.008	4.94106e-65	2.5947e-63	yes	Clspn	349	35.6667	10.8583	1.09767	-3.30629	3.16417e-36	1.66335e-34	yes
Sparcl1	51301.7	6228.33	2521.42	260.425	-3.27529	1.59164e-132	8.32022e-131	yes	Grm5	1205.67	156	21.3457	2.33633	-3.19163	9.88215e-65	5.17442e-63	yes	Camk2g	660.333	1912.33	30.2183	87.7057	1.53725	3.58267e-36	1.8779e-34	yes
Rasgrf2	1700.33	144.333	29.5157	2.11567	-3.8023	3.25201e-132	1.69508e-130	yes	Frmpd3	839	106.667	15.4087	1.71467	-3.16774	1.1175e-64	5.8345e-63	yes	Pecam1	2699	629.667	93.711	22.443	-2.06195	4.63121e-36	2.42051e-34	yes
Zwint	16765.7	2450.67	1227.8	160.851	-2.93228	3.58509e-132	1.86332e-130	yes	Glrb	4878.33	1091.33	236.576	43.4037	-2.44641	1.70353e-64	8.86862e-63	yes	Mmp3	68.6667	2286.33	4.32933	149.267	5.10761	5.01794e-36	2.6151e-34	yes
Tbxas1	39.3333	1471.67	3.22867	101.1	4.96871	1.10784e-131	5.74141e-130	yes	Cds1	1920	362	65.633	10.8397	-2.5981	2.41361e-64	1.25293e-62	yes	Plekhb1	6106.33	16792.7	392.03	1102.58	1.49184	5.13734e-36	2.66965e-34	yes
Fermt3	95	1390.67	4.941	62.0423	3.65038	2.48753e-131	1.28549e-129	yes	Chrm2	1034	81.6667	24.5467	1.69867	-3.85305	2.80047e-64	1.4496e-62	yes	Bmpr1b	77	406	1.65733	9.119	2.46001	5.21032e-36	2.69984e-34	yes
Kifc2	1467	50.6667	61.3517	1.79733	-5.09317	3.29158e-131	1.69615e-129	yes	Ctsh	626	7066	54.3407	525.001	3.27222	3.14226e-64	1.62189e-62	yes	Emid1	66.3333	387.667	4.04267	24.4167	2.59449	6.2992e-36	3.25476e-34	yes
Oprl1	1060	19.6667	49.9227	0.810667	-5.94444	6.62277e-131	3.40301e-129	yes	Sla	77	776	4.00933	32.965	3.0395	4.0782e-64	2.099e-62	yes	Eml2	732.667	1999	39.7783	100.433	1.33618	6.56283e-36	3.38135e-34	yes
Sgpl1	690.667	7890.33	23.069	226.502	3.2955	7.18761e-131	3.68278e-129	yes	Aif1	97	953.333	15.477	132.587	3.09875	5.17642e-64	2.65669e-62	yes	Prnp	4686.33	10926.7	245.024	586.257	1.25861	7.29488e-36	3.74787e-34	yes
Ank2	11313.3	1614.67	209.878	38.438	-2.44895	1.1976e-130	6.11892e-129	yes	Arhgef9	3243.33	757.333	92.826	19.8063	-2.22857	6.04137e-64	3.08499e-62	yes	Phyhd1	166.333	670.667	15.3483	67.3263	2.13309	7.86036e-36	4.02699e-34	yes
Mcl1	1201.33	7501.67	47.2643	251.525	2.41188	1.27363e-130	6.48905e-129	yes	Amph	2792.33	537.333	114.634	19.3733	-2.56489	6.04499e-64	3.08499e-62	yes	Brsk1	303	988	12.4407	40.3093	1.69605	8.35968e-36	4.27074e-34	yes
Rnf227	1688	86.3333	137.985	5.96833	-4.53104	2.08092e-130	1.05724e-128	yes	Dlg2	2325.33	442	49.073	7.76667	-2.65956	6.27485e-64	3.1933e-62	yes	Itgav	7377.67	3173.67	132.821	58.463	-1.18388	1.08749e-35	5.54008e-34	yes
Ttc3	11241	2317.33	384.376	68.8023	-2.48199	2.60992e-130	1.32229e-128	yes	C1qtnf6	71	1237.67	4.01167	60.392	3.91208	6.42636e-64	3.26124e-62	yes	Mcm10	281.333	32.3333	8.98533	1.039	-3.11238	1.31395e-35	6.67499e-34	yes
Pcnx2	1265	32.3333	23.3773	0.521667	-5.48584	4.15671e-130	2.10007e-128	yes	Glipr1	16.3333	464.667	2.064	51.2793	4.63486	6.99796e-64	3.5414e-62	yes	Cxcl12	1633.33	7009.67	76.517	391.106	2.35371	1.49524e-35	7.57479e-34	yes
Rap1gap	2845.67	275.333	124.837	11.6183	-3.42557	4.76632e-130	2.40135e-128	yes	Icam1	95.6667	1499.67	5.09133	69.0287	3.76108	7.78036e-64	3.92637e-62	yes	Diaph3	447.667	73.6667	13.3873	5.44433	-1.29804	2.04666e-35	1.03394e-33	yes
Sptbn4	1623.33	48.3333	42.0407	0.919	-5.51558	8.00089e-130	4.01978e-128	yes	Pcnx2	1265	147	23.3773	2.396	-3.28641	9.44129e-64	4.75133e-62	yes	Kdr	1708.67	472.333	32.8757	9.32167	-1.81836	2.27318e-35	1.14518e-33	yes
Gria4	2491.33	273	85.9647	6.71633	-3.678	1.21099e-129	6.06735e-128	yes	Axl	1750.33	10951.7	56.082	307.598	2.45543	9.78324e-64	4.90978e-62	yes	Rrm1	2329.67	770.667	68.0547	27.661	-1.29884	2.58128e-35	1.29679e-33	yes
Plod2	173	2479	6.40667	77.8433	3.60293	1.43828e-129	7.18624e-128	yes	Plxnb2	1120	7227	23.2547	130.763	2.49137	1.15519e-63	5.78137e-62	yes	Cntnap1	122.667	538.667	2.58567	11.6277	2.16895	3.48063e-35	1.74378e-33	yes
Tcirg1	226	2775	11.3497	117.997	3.37803	1.76437e-129	8.79125e-128	yes	Nell1	796.333	88.6667	33.8047	3.18	-3.41012	1.25743e-63	6.27573e-62	yes	Sult1a1	109.333	493.667	10.1347	45.8683	2.1782	3.98334e-35	1.99014e-33	yes
Cep170b	3371	442.333	73.852	7.88733	-3.22703	1.88919e-129	9.38732e-128	yes	Cyp4v3	231.667	1798.33	8.18	55.172	2.75376	1.59693e-63	7.94826e-62	yes	Rida	414.333	1373	47.239	160.996	1.76897	7.52269e-35	3.74812e-33	yes
Rims3	2593.33	177	53.8527	3.332	-4.01456	2.23322e-129	1.10664e-127	yes	Cacna1i	632.333	54.6667	11.0747	0.654667	-4.08036	1.7302e-63	8.58798e-62	yes	Kif15	268	34.3333	8.96033	1.46767	-2.61003	8.32559e-35	4.12989e-33	yes
Nrros	52.6667	1365	3.023	60.545	4.32395	4.8055e-129	2.37478e-127	yes	Cd86	28	490.667	1.474	22.6803	3.94363	2.09894e-63	1.03897e-61	yes	Mmd2	841.333	2286.67	28.9333	80.7727	1.48113	8.33446e-35	4.12989e-33	yes
Pdxp	1271.67	87.3333	85.4923	4.965	-4.10593	1.11121e-128	5.47644e-127	yes	Cit	1512.67	244.667	27.0517	3.84867	-2.81329	3.5824e-63	1.76846e-61	yes	Sptb	250.333	823.333	2.813	9.41967	1.74357	1.5896e-34	7.8553e-33	yes
Nrxn3	2226	91.6667	47.1533	1.551	-4.92609	1.32858e-128	6.52991e-127	yes	Mt2	2503	11256.7	657.139	2587.82	1.97747	4.72863e-63	2.32795e-61	yes	Hells	487	81.3333	11.11	1.63467	-2.76479	1.75086e-34	8.62872e-33	yes
Pnma8c	1333	60.6667	35.3567	1.36067	-4.6996	2.00634e-128	9.83431e-127	yes	Spock1	5070	1174.33	169.702	35.0997	-2.27348	6.28698e-63	3.08676e-61	yes	Asrgl1	765.333	2147	20.8337	60.0617	1.52753	1.83481e-34	9.0179e-33	yes
Celf4	1786	91.3333	75.355	2.982	-4.65935	2.70618e-128	1.32288e-126	yes	Snph	2850	600	133.75	20.8963	-2.67822	8.08894e-63	3.96074e-61	yes	Slc24a4	11.3333	207	0.506333	9.03833	4.1579	2.07527e-34	1.01722e-32	yes
Gnal	2701.33	132.333	70.469	2.692	-4.71024	2.96178e-128	1.44393e-126	yes	Scpep1	367.333	3173.33	23.6587	176.957	2.90296	9.58992e-63	4.68304e-61	yes	Tmem47	642.333	2789.67	19.274	84.479	2.13194	2.52887e-34	1.23621e-32	yes
Kcnj3	970.333	33.6667	32.9303	1.16433	-4.82184	6.27847e-128	3.05265e-126	yes	Tifab	68	713.333	3.203	29.3357	3.19516	1.0606e-62	5.1653e-61	yes	Sox8	447.333	1295.33	15.974	47.399	1.56913	2.8923e-34	1.41008e-32	yes
Calu	1997.67	13119.7	89.3887	495.234	2.46995	6.30107e-128	3.05543e-126	yes	Vsir	688.667	4014.67	24.9983	122.797	2.29637	1.07651e-62	5.22037e-61	yes	Ulbp1	473.333	87.6667	11.7313	2.014	-2.54223	2.92251e-34	1.42098e-32	yes
Akap6	4463	509.667	44.3647	4.94333	-3.16586	8.23113e-128	3.98065e-126	yes	Dnajc27	3476.33	605.333	99.2427	15.2383	-2.70326	1.07767e-62	5.22037e-61	yes	Mcm3	1304.67	427.667	49.1273	16.492	-1.57476	3.7567e-34	1.8217e-32	yes
Cybb	75.6667	2149.67	2.18	51.523	4.56282	1.47882e-127	7.13263e-126	yes	Tcirg1	226	1884.67	11.3497	82.8397	2.86767	1.13602e-62	5.48836e-61	yes	Nt5dc2	1252.67	394	84.1803	27.6513	-1.60613	4.02586e-34	1.94701e-32	yes
Cnn2	202.667	2824	11.1647	131.388	3.55682	2.06636e-127	9.93994e-126	yes	Ahi1	3475.67	826.333	99.5237	23.087	-2.10796	1.36461e-62	6.57517e-61	yes	Slc6a5	66.6667	557.667	1.072	9.216	3.10384	4.37241e-34	2.10899e-32	yes
Cplx2	3437.67	504.333	93.9317	11.698	-3.00535	2.43114e-127	1.16637e-125	yes	Anxa4	219.667	2482.67	15.175	158.642	3.38601	1.56843e-62	7.5372e-61	yes	Lama2	1025.67	3331	17.0387	63.0183	1.88696	4.73762e-34	2.27909e-32	yes
Adgrb1	1849.33	123.333	63.2883	3.625	-4.12589	4.85546e-127	2.3233e-125	yes	Sptbn4	1623.33	209.333	42.0407	4.65167	-3.17597	1.58912e-62	7.61643e-61	yes	Tes	1550.67	401.667	73.193	19.2523	-1.92667	5.37695e-34	2.5798e-32	yes
Hmgb2	127.667	1599.33	8.12367	76.09	3.2275	6.82359e-127	3.25642e-125	yes	Hoxb8	2194.33	436.333	141.013	23.166	-2.60575	2.01364e-62	9.62564e-61	yes	Egflam	219.667	970.333	5.332	24.045	2.17299	5.91302e-34	2.82951e-32	yes
Ncf4	35	1039	3.302	85.4803	4.69418	1.29102e-126	6.1449e-125	yes	Wfdc17	8.66667	494.667	2.18767	108.39	5.63069	2.41876e-62	1.15318e-60	yes	Mtss2	1625	4360.33	47.109	130.226	1.46694	7.84294e-34	3.74315e-32	yes
Pcp4	1281.67	55.6667	267.558	9.95	-4.74901	2.37336e-126	1.12669e-124	yes	Ppm1e	2454.67	438.667	52.0273	8.15033	-2.67434	2.86973e-62	1.36459e-60	yes	Paqr6	42.6667	367.667	3.60667	28.65	2.9898	7.9653e-34	3.79156e-32	yes
Tlr2	89.3333	1589.67	3.99	60.3803	3.91962	2.42347e-126	1.14747e-124	yes	Syn1	6764.33	1143.33	280.712	41.555	-2.756	3.76139e-62	1.7839e-60	yes	Nsg2	282.667	1297	14.3703	68.241	2.24755	8.05707e-34	3.82521e-32	yes
Pld4	233.333	2558.33	15.9117	147.357	3.21116	2.44065e-126	1.15259e-124	yes	Igsf6	26.6667	589.333	1.642	31.6323	4.26787	3.7725e-62	1.7845e-60	yes	Bcan	942	2983.33	34.146	111.228	1.70373	9.11268e-34	4.31508e-32	yes
Gabra1	961.333	28	32.277	0.834667	-5.27316	3.60442e-126	1.69774e-124	yes	Cd300lb	10.6667	562.667	0.536333	23.6803	5.46442	1.21667e-61	5.74023e-60	yes	Zwilch	305.333	49.6667	13.3213	2.03667	-2.70946	1.43424e-33	6.77381e-32	yes
Parvg	80	1663.67	4.13967	73.4003	4.1482	5.16872e-126	2.42823e-124	yes	Hmox1	243	1716.33	20.864	128.001	2.61707	1.54741e-61	7.28166e-60	yes	Bst1	648.333	91	27.6013	3.95733	-2.80214	1.51141e-33	7.11972e-32	yes
Slc16a3	39.3333	1383.33	2.77133	90.667	5.03193	5.24933e-126	2.45971e-124	yes	Eef1a2	13440.7	2105.33	863.451	119.081	-2.85818	1.85611e-61	8.71168e-60	yes	Tnc	8550	2088.67	137.423	34.4827	-1.99468	1.52107e-33	7.14668e-32	yes
Kcnc4	1061	30.6667	39.3053	0.994667	-5.30437	5.28541e-126	2.47021e-124	yes	Slc7a14	2620.67	537.667	39.834	7.168	-2.47436	2.66444e-61	1.24733e-59	yes	Ggt5	111	567	3.93367	20.9237	2.41119	2.54377e-33	1.19209e-31	yes
Nos1	1215.33	75	16.8387	1.06467	-3.9833	8.29887e-126	3.8686e-124	yes	Pycard	42.6667	582.333	4.516	62.935	3.80075	4.44156e-61	2.07391e-59	yes	Apoc2	940.333	214.333	170.768	39.6897	-2.1052	2.71304e-33	1.26814e-31	yes
Slc24a2	6686	670.333	89.345	7.98733	-3.4836	8.7029e-126	4.04651e-124	yes	Iqgap1	487.667	4164.67	9.878	65.373	2.7264	4.57597e-61	2.13118e-59	yes	Pcx	324.333	985.333	9.23133	28.4067	1.62162	3.49926e-33	1.63143e-31	yes
Dlg4	4304.33	659.667	218.047	24.8297	-3.1345	1.00568e-125	4.66402e-124	yes	Nrros	52.6667	715	3.023	32.532	3.42781	5.7593e-61	2.67542e-59	yes	Itih2	917.333	3335.67	36.0273	132.679	1.88078	3.71698e-33	1.72849e-31	yes
Anxa1	167	5085.67	13.592	347.31	4.6754	1.8716e-125	8.65769e-124	yes	Rab9b	773.333	88.3333	26.2483	2.615	-3.32734	6.84241e-61	3.17044e-59	yes	Pdlim1	1326.67	406.333	101.921	32.0243	-1.67021	4.22845e-33	1.96131e-31	yes
Klk8	29	1857.67	4.19367	215.639	5.68426	3.88393e-125	1.79206e-123	yes	Zfp36l2	585.333	3137	22.3567	103.873	2.21604	9.17814e-61	4.24185e-59	yes	Cntfr	126	553	7.43567	33.0757	2.15324	4.80917e-33	2.22498e-31	yes
Ugt1a7c	10.3333	1444.33	0.535	71.9937	7.07219	5.08073e-125	2.3383e-123	yes	Habp4	4118.67	866	211.584	38.0023	-2.47707	9.93987e-61	4.5822e-59	yes	Mia	14.6667	236	2.85067	48.8713	4.09962	5.08424e-33	2.34625e-31	yes
Vim	1888.67	49253.7	116.928	2564.2	4.45481	6.72456e-125	3.08698e-123	yes	Nek6	391.667	1962.33	23.33	90.725	1.95931	9.98604e-61	4.5918e-59	yes	Syn2	174.333	732.667	5.83967	25.7907	2.14289	5.24898e-33	2.41613e-31	yes
Ttll7	6473	557	135.829	10.6093	-3.67838	1.1262e-124	5.15685e-123	yes	Klc2	5103.67	933.667	219.362	35.5163	-2.62676	1.46257e-60	6.70818e-59	yes	Tmem130	94	574.333	3.786	24.0233	2.66569	5.33892e-33	2.45131e-31	yes
Elavl2	1729.33	49	62.91	1.831	-5.10259	1.15781e-124	5.28822e-123	yes	Wdfy4	65.3333	1030	0.864667	18.196	4.39533	2.37729e-60	1.08761e-58	yes	Lag3	133.667	785.333	7.65067	45.7257	2.57935	5.41383e-33	2.47943e-31	yes
Car10	1023	42	42.1233	1.45967	-4.85091	4.23092e-124	1.92757e-122	yes	Spock3	2966	415.333	135.044	16.2357	-3.05619	3.04768e-60	1.3908e-58	yes	Col9a3	259	931.667	10.3667	38.195	1.88143	5.91678e-33	2.70294e-31	yes
Cds1	1920	187.333	65.633	5.45733	-3.58815	1.27629e-123	5.80005e-122	yes	Fzd7	203.667	1461.33	6.04833	37.7283	2.64104	3.35689e-60	1.52806e-58	yes	Map2	1062.67	2593.67	26.3333	62.294	1.2422	6.84044e-33	3.11704e-31	yes
Lamp5	3877	90.6667	266.862	5.223	-5.67507	1.50696e-123	6.83117e-122	yes	Lcp1	707	5073	29.6043	167.317	2.49871	4.04173e-60	1.83519e-58	yes	Brca1	357.333	63.3333	6.27367	1.13733	-2.46365	6.88659e-33	3.13021e-31	yes
Ube2c	20.3333	990	2.81333	116.626	5.37347	2.10047e-123	9.4978e-122	yes	Il10rb	253.667	2388.67	18.4377	150.609	3.03008	4.09228e-60	1.8535e-58	yes	Cadm3	630.667	2082	22.4713	72.4703	1.6893	7.99999e-33	3.62719e-31	yes
Tagln3	3637	311.667	392.628	28.621	-3.77802	2.1087e-123	9.51126e-122	yes	Ptpn5	1326.33	217.667	56.5803	8.15133	-2.79519	4.18196e-60	1.88939e-58	yes	Cst7	128	1026.33	14.9673	121.293	3.01861	8.0326e-33	3.62814e-31	yes
Wdfy4	65.3333	1141.33	0.864667	24.4387	4.82088	3.14053e-123	1.41301e-121	yes	Cntnap5a	671	54	8.297	0.582	-3.8335	4.54363e-60	2.04769e-58	yes	Lrrc59	5361.67	2166	215.649	89.305	-1.27187	8.04209e-33	3.62814e-31	yes
Igsf6	26.6667	1149.33	1.642	60.202	5.19629	3.17938e-123	1.42694e-121	yes	Micu3	1335.67	240	75.3283	11.7607	-2.67922	7.08827e-60	3.18656e-58	yes	Ccne2	380	73.3333	14.8363	2.91667	-2.34674	1.42622e-32	6.41832e-31	yes
Pdia6	1720	8521.33	108.011	457.343	2.0821	3.72824e-123	1.66913e-121	yes	Rit2	1580	187.333	115.092	12.0707	-3.25321	7.16378e-60	3.21253e-58	yes	Mfap4	486	1817	32.6013	123.686	1.92368	1.62475e-32	7.29366e-31	yes
Man2a1	231.667	3963.33	4.59033	64.907	3.8217	6.47494e-123	2.89166e-121	yes	Syt13	1201.33	162.333	42.7527	5.051	-3.08137	7.56366e-60	3.38348e-58	yes	Lrig1	1095.67	3159.67	25.2693	74.902	1.56762	1.8127e-32	8.11731e-31	yes
Svop	1247.67	57	52.8263	2.48967	-4.40723	7.46721e-123	3.32659e-121	yes	Kcnh2	1774.67	316	65.4183	10.6497	-2.61889	9.30669e-60	4.15294e-58	yes	Ska3	238	25	12.088	1.305	-3.21145	2.19776e-32	9.81736e-31	yes
Ggta1	89	1938.67	3.95033	65.2673	4.04631	9.56555e-123	4.25091e-121	yes	Soat1	692.667	3984	19.4143	129.939	2.74264	1.17118e-59	5.21331e-58	yes	Cenpf	520.667	106.667	5.43033	1.13667	-2.25623	2.57506e-32	1.14745e-30	yes
Piezo1	152.667	3610	2.69567	53.042	4.29842	1.33194e-122	5.9046e-121	yes	Golm1	215.333	1306	7.811	41.0663	2.39438	1.6346e-59	7.25833e-58	yes	Cenpi	295.333	37.3333	10.668	1.612	-2.72637	2.64484e-32	1.17566e-30	yes
Tgm2	669.667	10351	25.2093	329.428	3.70793	1.72884e-122	7.64538e-121	yes	Arpc1b	607.333	5522	48.8277	385.637	2.98147	1.90608e-59	8.44316e-58	yes	Prkag2	524	1483.33	25.242	74.988	1.57083	2.88806e-32	1.28063e-30	yes
Glra1	1554	10	90.5547	0.475667	-7.57269	1.91341e-122	8.44095e-121	yes	Ifi202b	20.3333	652.667	1.59533	44.5933	4.8049	2.37275e-59	1.04847e-57	yes	Pygb	2336.33	6619	68.2757	198.166	1.53727	3.05994e-32	1.35354e-30	yes
Cd300c2	49.3333	1487.33	5.499	140.426	4.67449	7.72374e-122	3.39901e-120	yes	Tgm1	7	555.667	0.343333	23.875	6.11975	3.15573e-59	1.39106e-57	yes	Hjurp	869.333	271	30.51	11.5663	-1.39935	3.0908e-32	1.36386e-30	yes
Lgmn	4431	29376.3	301.679	1694.01	2.48936	1.07784e-121	4.73179e-120	yes	Ttbk2	3393.33	838	42.0553	9.437	-2.15589	3.48391e-59	1.53199e-57	yes	Man2a1	3963.33	1292.67	64.907	21.655	-1.58367	3.20434e-32	1.41053e-30	yes
Nap1l3	1106.67	61.6667	52.496	2.50467	-4.38952	1.28989e-121	5.64895e-120	yes	Junb	144.333	1064	10.6727	68.8717	2.68999	3.64425e-59	1.59862e-57	yes	Vstm2a	34.3333	264.667	1.81933	12.2437	2.75055	3.40765e-32	1.4964e-30	yes
Gla	304.667	2775.67	13.3997	108.524	3.01775	1.9042e-121	8.31914e-120	yes	Fam20c	794.333	3306	30.1683	110.272	1.86996	3.78613e-59	1.65684e-57	yes	Dtl	319	45	8.64433	1.26267	-2.77528	4.20537e-32	1.84224e-30	yes
Kcnab3	1583.33	36.3333	83.0657	1.64333	-5.65956	4.08388e-121	1.77988e-119	yes	Elf4	47.3333	704.667	1.257	14.0577	3.4833	4.26809e-59	1.86325e-57	yes	C1ra	435.333	2168.67	16.701	84.7037	2.34249	4.2426e-32	1.85407e-30	yes
Mcm3	75.6667	1304.67	3.34367	49.1273	3.87702	4.95176e-121	2.15294e-119	yes	Lipa	605	4206.33	27.4687	165.466	2.59068	5.21377e-59	2.27062e-57	yes	Thsd4	580.333	2070.33	9.063	30.9263	1.77078	4.72543e-32	2.0601e-30	yes
Tuba4a	6934	785.667	441.951	46.568	-3.24648	8.02132e-121	3.47917e-119	yes	Tro	2290.67	447	65.5377	8.768	-2.902	9.64812e-59	4.19173e-57	yes	Nipal3	501	1708	11.5673	40.906	1.82226	6.27873e-32	2.73072e-30	yes
Mcm5	69	1267.67	3.338	52.0447	3.96269	1.46643e-120	6.34531e-119	yes	St8sia1	1305.33	169.667	19.5873	2.21267	-3.14606	9.71469e-59	4.21055e-57	yes	Trip13	273	27.3333	14.6287	1.599	-3.19356	6.39817e-32	2.77601e-30	yes
Arhgef4	4612.67	244.333	184.264	5.71033	-5.01206	1.17263e-119	5.06189e-118	yes	Ikzf1	87	829.667	4.882	25.343	2.37604	1.03124e-58	4.45896e-57	yes	Aspm	478.667	74	5.54867	0.895	-2.63218	1.11489e-31	4.82569e-30	yes
Sbno2	205.333	2698	6.59733	74.6117	3.49945	1.27406e-119	5.48665e-118	yes	Renbp	93	897	9.062	74.7503	3.04418	1.20704e-58	5.20667e-57	yes	Cd81	5169.67	12648	414.815	1049.35	1.33896	1.18596e-31	5.12107e-30	yes
Scn2b	1937.33	120	56.1513	2.92833	-4.26117	1.67469e-119	7.19479e-118	yes	Crtap	144.667	1260.67	11.6633	88.0727	2.91671	2.24864e-58	9.67665e-57	yes	Nrep	1259	2856	65.8007	153.034	1.21767	1.28912e-31	5.55332e-30	yes
Flna	1098.67	17624	18.6907	242.528	3.69776	1.94148e-119	8.32123e-118	yes	Hap1	2180.67	346.333	113.578	15.524	-2.87111	2.47358e-58	1.06194e-56	yes	Melk	418	56	16.215	2.193	-2.88635	1.39112e-31	5.97851e-30	yes
Chrm2	1034	13	24.5467	0.261	-6.55533	1.9742e-119	8.44147e-118	yes	Lsamp	5465	1348	140.323	43.4573	-1.69108	2.56982e-58	1.10065e-56	yes	Nt5e	1128.33	305	32.406	8.996	-1.84891	1.70237e-31	7.29888e-30	yes
Mdfic	109.333	2223	5.032	99.992	4.31261	2.88919e-119	1.23247e-117	yes	Nbea	2436	603	40.603	10.5903	-1.93884	2.84745e-58	1.21668e-56	yes	Lrrc75b	164	623	4.086	16.099	1.97821	1.77534e-31	7.59376e-30	yes
Ccdc92	2502.33	121	150.247	6.22767	-4.5925	4.73224e-119	2.01393e-117	yes	Tgfbr2	636	5216	16.137	112.876	2.8063	3.01048e-58	1.28332e-56	yes	Disp2	421.333	1429.33	7.27033	25.4303	1.80646	1.91717e-31	8.18115e-30	yes
Ppfia3	1474	111	43.0343	2.919	-3.88194	4.84255e-119	2.05604e-117	yes	Flnc	319.667	2628.33	4.80233	33.9487	2.82155	3.20162e-58	1.36159e-56	yes	Ccn2	7843.33	2442.67	377.516	121.151	-1.63973	2.06971e-31	8.81134e-30	yes
Camkk1	2004.67	103	78.2977	3.689	-4.40767	5.5473e-119	2.34974e-117	yes	Cebpd	58	730.667	2.099	22.965	3.45166	3.96111e-58	1.68064e-56	yes	Ogn	916	3005.67	40.7233	137.798	1.75863	2.18551e-31	9.28253e-30	yes
Sez6l	1611.67	106	36.7643	2.09433	-4.13374	7.86478e-119	3.3236e-117	yes	Nsg1	4410.33	1015	455.208	89.565	-2.34552	3.97916e-58	1.68436e-56	yes	Gfra3	21.6667	231	1.25433	13.5937	3.43794	2.22765e-31	9.43939e-30	yes
Camk2n1	3903.67	385.667	118.176	9.916	-3.57503	1.3588e-118	5.72883e-117	yes	Ctsl	2648.67	19619.7	202.159	1314.12	2.70053	7.372e-58	3.11325e-56	yes	Prkar1b	617.333	1993.33	27.1553	91.2063	1.7479	2.33581e-31	9.87467e-30	yes
Lgi3	4565.67	561.667	207.795	22.7643	-3.19032	1.552e-118	6.52816e-117	yes	Dnm3	5787.67	1007	113.764	24.037	-2.24272	9.90674e-58	4.17396e-56	yes	Gprasp2	132.333	521.667	3.94267	16.185	2.03741	2.43766e-31	1.02812e-29	yes
Sgpp2	1596.33	22	53.1577	0.634	-6.38965	2.53882e-118	1.06542e-116	yes	Tgif1	46.3333	618.667	4.00433	48.4057	3.59554	1.84841e-57	7.76977e-56	yes	Cmbl	170.333	626.333	19.1877	75.0513	1.9677	2.60601e-31	1.09658e-29	yes
Grm5	1205.67	60.3333	21.3457	0.921333	-4.53408	2.58479e-118	1.0822e-116	yes	Man2b2	659.667	3448	27.8577	124.367	2.15846	2.43673e-57	1.02191e-55	yes	Fignl1	356	54.3333	13.788	2.197	-2.64981	3.00462e-31	1.26138e-29	yes
Pros1	431.333	3243.33	17.6453	112.206	2.66879	3.62999e-118	1.5163e-116	yes	Kif5c	11098.3	1695	217.845	29.6827	-2.87561	3.03163e-57	1.26845e-55	yes	Spock1	299	1174.33	10.164	35.0997	1.78799	3.18794e-31	1.33525e-29	yes
Grin2a	975	39.6667	9	0.309	-4.86425	6.18662e-118	2.57828e-116	yes	Dnajc6	3683.67	742.667	105.702	17.3993	-2.6029	3.31588e-57	1.38419e-55	yes	Wnk2	59.3333	380.333	1.40433	8.228	2.55066	3.70549e-31	1.54845e-29	yes
Adam22	2368.67	322	47.3093	7.02467	-2.75162	1.36133e-117	5.66031e-116	yes	Napb	4613	558.667	140.407	14.9387	-3.23249	4.21169e-57	1.7541e-55	yes	Gja1	2934.33	7034.67	109.29	269.296	1.30103	3.79694e-31	1.58302e-29	yes
Ptprc	86.6667	1759.33	2.69833	44.0913	4.03035	1.90655e-117	7.90912e-116	yes	Vstm2a	1485.67	264.667	84.5913	12.2437	-2.78847	5.1095e-57	2.12314e-55	yes	E2f7	233.333	25.6667	5.68133	0.63	-3.17281	4.49253e-31	1.86873e-29	yes
Elf4	47.3333	950.333	1.257	20.7533	4.04529	3.31547e-117	1.37224e-115	yes	Gls2	619.667	48.6667	38.1473	2.96267	-3.68661	5.14263e-57	2.13202e-55	yes	Pfn2	1400	3256.33	78.9977	187.235	1.24497	5.26876e-31	2.1866e-29	yes
Brsk2	1997.33	114.667	84.704	4.71633	-4.16669	4.32902e-117	1.78765e-115	yes	Clstn2	1189	186	36.973	5.017	-2.88158	5.43077e-57	2.24633e-55	yes	Dbf4	456	87.6667	21.6797	4.36833	-2.31119	5.36203e-31	2.22022e-29	yes
Aldh1a3	25.3333	1368	1.21533	54.2787	5.48096	6.11416e-117	2.51906e-115	yes	Prkar1b	10319	1993.33	562.271	91.2063	-2.62406	7.08479e-57	2.92381e-55	yes	Rasl10b	119.667	539.667	4.35333	20.8267	2.25824	5.81513e-31	2.40235e-29	yes
Pon3	82.3333	1094.33	6.10867	71.0143	3.53918	6.42752e-117	2.64215e-115	yes	Pvalb	1531	248	209.701	29.7533	-2.81721	1.62656e-56	6.69735e-55	yes	Has2	399.667	53	10.6867	1.473	-2.85898	5.89549e-31	2.43001e-29	yes
Cmtm3	133	1854.67	12.7707	138.933	3.44348	6.61965e-117	2.71496e-115	yes	Rragb	1516.67	288	91.538	15.5353	-2.55882	1.74571e-56	7.17164e-55	yes	Abca2	2984.33	7509.33	42.4643	109.258	1.36341	8.42447e-31	3.46454e-29	yes
Golga7b	1201.33	30.6667	57.0657	1.227	-5.53942	1.04284e-116	4.26737e-115	yes	Caly	779	82.3333	104.284	9.689	-3.42802	2.13899e-56	8.76744e-55	yes	Ccdc136	190.667	647	8.29167	30.3277	1.8709	9.64314e-31	3.95674e-29	yes
Dock2	136.333	2268.33	2.87233	40.725	3.82562	1.36478e-116	5.57219e-115	yes	Pdxp	1271.67	197.667	85.4923	11.6183	-2.87939	2.64064e-56	1.07992e-54	yes	Gpr35	1021.67	285	38.2137	10.895	-1.81042	1.13524e-30	4.64756e-29	yes
Clec4d	8.66667	1721.33	1.03067	152.854	7.21244	1.70031e-116	6.92646e-115	yes	Lama2	409.667	3331	7.33667	63.0183	3.10257	3.77121e-56	1.53881e-54	yes	Sult4a1	173.667	1220	8.67833	60.8073	2.80876	1.16274e-30	4.74943e-29	yes
Kcnab2	9667.67	1239.33	360.77	42.8843	-3.07256	2.52538e-116	1.02644e-114	yes	Fam135b	849	101	6.493	0.682333	-3.25034	4.02655e-56	1.6393e-54	yes	Gla	2775.67	988	108.524	39.2967	-1.46554	1.16924e-30	4.76526e-29	yes
Ddx25	1022.33	49.6667	19.754	0.822	-4.58686	3.25605e-116	1.32045e-114	yes	Dgkb	761.333	102.333	19.4163	2.033	-3.25559	4.22428e-56	1.71595e-54	yes	Aifm3	26	234	1.139	10.435	3.19559	1.1934e-30	4.85281e-29	yes
Scg3	5423.67	547	340.24	28.8637	-3.55923	4.30187e-116	1.74067e-114	yes	Tmem86a	274	3042	19.993	193.249	3.27289	4.50109e-56	1.8243e-54	yes	Kcng4	13.6667	241	0.416667	7.44967	4.16021	1.23264e-30	5.00114e-29	yes
Lgi2	3161.33	264.667	67.6047	4.86133	-3.7977	8.33866e-116	3.36655e-114	yes	Kifc2	1467	258.333	61.3517	9.52067	-2.68797	6.73034e-56	2.72173e-54	yes	Selp	352	30	11.763	1.00867	-3.54373	1.3683e-30	5.53916e-29	yes
Map1a	31035.7	4609.67	399.006	51.1843	-2.96264	8.80774e-116	3.54801e-114	yes	Nell2	1808	383.333	81.441	14.7513	-2.46491	8.4176e-56	3.39647e-54	yes	Pole	433	91	11.6257	2.28967	-2.3441	1.38844e-30	5.60817e-29	yes
Ybx1	1706.33	12411.3	141.619	883.416	2.64108	9.67279e-116	3.88782e-114	yes	Nfe2l2	558.667	2688	30.3443	127.406	2.06993	9.01711e-56	3.63029e-54	yes	Pcsk1n	316.667	1240	16.3633	66.195	2.01626	1.39469e-30	5.6209e-29	yes
Fbxl16	1893.67	165.333	75.4963	5.64667	-3.74094	5.64754e-115	2.2649e-113	yes	Hpcal4	1684.33	311.333	47.4433	7.38933	-2.68269	9.27796e-56	3.72703e-54	yes	Cdip1	727.333	1878.33	32.082	86.1393	1.42491	2.0463e-30	8.22877e-29	yes
Ppfia4	1062	38.6667	26.04	0.899333	-4.85573	5.86356e-115	2.34633e-113	yes	Scg5	7867.33	1421.33	871.538	138.369	-2.65504	9.92043e-56	3.97629e-54	yes	Atp1a3	2106	6054	66.0787	195.451	1.56455	2.13468e-30	8.56517e-29	yes
Spi1	90.6667	1375.67	7.90767	94.9397	3.58569	1.31968e-114	5.26909e-113	yes	B2m	1697.67	16902	263.751	2277.7	3.11033	1.24888e-55	4.99469e-54	yes	Lynx1	656	1837.67	18.9833	53.571	1.49672	2.35498e-30	9.42823e-29	yes
Cacng2	1131	12	27.481	0.247667	-6.79389	1.61439e-114	6.43162e-113	yes	Sirpa	2668	12646.7	104.165	424.706	2.02759	1.35873e-55	5.42205e-54	yes	Lilrb4b	1815.67	432.667	146.89	36.2093	-2.0203	3.01182e-30	1.20314e-28	yes
Ifi30	100.667	3167	13.8967	367.424	4.72463	2.24332e-114	8.91758e-113	yes	Mfap2	30.6667	665.667	3.87867	72.4593	4.22354	1.71633e-55	6.83399e-54	yes	Cip2a	440.667	69.3333	12.655	2.063	-2.61689	3.48208e-30	1.38793e-28	yes
Dock8	145.333	1633.33	2.52667	23.954	3.24496	2.63498e-114	1.04515e-112	yes	Dlg4	4304.33	1181.67	218.047	45.6263	-2.2567	2.50226e-55	9.94156e-54	yes	Fjx1	178	651.667	6.46967	24.329	1.91091	3.5957e-30	1.43008e-28	yes
Lilrb4b	7.33333	1815.67	0.751667	146.89	7.61042	2.87171e-114	1.13656e-112	yes	Zwint	16765.7	4055	1227.8	261.705	-2.23006	3.5152e-55	1.39354e-53	yes	Ets1	1590.67	519.333	43.405	13.8983	-1.64295	3.60487e-30	1.43059e-28	yes
Fam111a	69	1114.67	2.834	38.8563	3.77724	3.50307e-114	1.38341e-112	yes	Creg2	920.333	135.667	20.3107	2.62	-2.9546	3.81056e-55	1.50733e-53	yes	Atp6v1g2	134.333	557.667	10.5457	43.6497	2.04932	4.78825e-30	1.89607e-28	yes
Kcnc2	949	35.3333	28.9217	0.952	-4.92505	4.28648e-114	1.6891e-112	yes	Tnfrsf1a	332	2539.67	21.3527	139.489	2.70766	4.27868e-55	1.68882e-53	yes	Ndrg1	4293	12230.7	171.22	496.818	1.53687	4.95822e-30	1.95484e-28	yes
Foxm1	39	905.333	1.7	24.9113	3.8732	5.71974e-114	2.24898e-112	yes	Colgalt1	450.667	2296.67	18.9443	83.6453	2.14252	5.74042e-55	2.26085e-53	yes	Nrbp2	758	1937.67	29.9807	78.382	1.38649	4.95963e-30	1.95484e-28	yes
Hexb	2980.33	20226	210.371	1218.52	2.53412	5.79634e-114	2.27415e-112	yes	Asb13	1548	338.667	46.71	8.925	-2.38781	6.7635e-55	2.65801e-53	yes	Ndrg4	637	3338.67	28.2557	139.742	2.30615	4.96903e-30	1.95484e-28	yes
Gpr157	75.3333	1139.67	2.07833	26.5957	3.67769	6.14291e-114	2.40491e-112	yes	Cend1	5057	913	391.711	62.2493	-2.65366	6.87904e-55	2.69757e-53	yes	Abca9	343	1140	6.18	20.975	1.76299	5.43716e-30	2.13438e-28	yes
Tnfrsf23	33	918	2.44333	49.1947	4.33158	7.10558e-114	2.77578e-112	yes	Pirb	26.6667	757.667	0.939333	23.024	4.61536	7.73921e-55	3.02832e-53	yes	Plk4	436.667	92.6667	14.4	3.95233	-1.86529	5.62888e-30	2.20487e-28	yes
Rragb	1516.67	116.667	91.538	6.39033	-3.84041	8.52673e-114	3.32377e-112	yes	Stab1	235.667	2765.33	4.22233	44.6447	3.40238	8.22326e-55	3.21079e-53	yes	Wdhd1	377.333	77.3333	10.2037	2.13267	-2.25836	5.7059e-30	2.23022e-28	yes
Srgap3	4224.67	796	66.5987	10.2913	-2.69406	1.08807e-113	4.23224e-112	yes	Ctsk	179.667	2183.67	16.0347	169.334	3.40061	8.24872e-55	3.21381e-53	yes	Mid1ip1	1174.67	2942.67	77.6207	200.643	1.37012	7.2834e-30	2.84068e-28	yes
Rufy3	4224.33	855.667	156.82	27.762	-2.49793	1.36769e-113	5.30845e-112	yes	Hacd4	128.333	1337.33	3.768	33.6037	3.15675	8.90702e-55	3.46284e-53	yes	Cdh1	503	1721.33	13.0117	45.52	1.80669	7.53891e-30	2.93403e-28	yes
Usp29	907.667	17.3333	21.4097	0.423667	-5.65919	1.49856e-113	5.80394e-112	yes	Sash3	51.3333	600.333	2.55567	26.178	3.35658	1.36222e-54	5.28465e-53	yes	Rad51	287.333	52	11.2647	2.908	-1.95371	7.65646e-30	2.9734e-28	yes
Rai14	156	2206	4.44767	53.364	3.58475	1.68972e-113	6.53034e-112	yes	Tmem151b	1256.67	172	34.863	4.18433	-3.05863	1.48775e-54	5.75932e-53	yes	Susd2	142	842.333	5.20567	31.5973	2.60165	8.56801e-30	3.32029e-28	yes
Plaur	16	1183	1.44333	89.3103	5.95135	1.75972e-113	6.78636e-112	yes	Csf2rb2	48	958	1.609	25.1703	3.96749	1.72622e-54	6.66821e-53	yes	Sncb	53.3333	353.333	4.64567	31.8927	2.77927	8.97482e-30	3.47052e-28	yes
Msn	1880.33	18527	66.1717	551.508	3.0591	2.2269e-113	8.56976e-112	yes	Rhbdf2	24.3333	455	0.91	14.7773	4.02138	1.85504e-54	7.15059e-53	yes	E2f8	346	71.6667	11.0173	2.32933	-2.24179	9.01768e-30	3.47967e-28	yes
Esrrg	906.667	19.6667	23.7543	0.438667	-5.75892	2.53396e-113	9.73074e-112	yes	Gcnt1	48.3333	558.667	1.70967	18.2337	3.41482	1.9769e-54	7.60415e-53	yes	Pgam1	12847.3	5990	826.163	395.393	-1.06314	9.82257e-30	3.78221e-28	yes
Ttyh1	8932.33	556.667	417.062	23.2377	-4.16572	3.05645e-113	1.17123e-111	yes	Slc24a2	6686	1403	89.345	16.0073	-2.48065	2.06745e-54	7.93558e-53	yes	Mapk4	184	694.333	4.59	17.6703	1.94476	1.09618e-29	4.21192e-28	yes
Vav1	97	1577	4.438	61.1817	3.78512	3.21588e-113	1.22972e-111	yes	Slc6a17	2971	423	64.0293	7.909	-3.01717	2.8968e-54	1.10954e-52	yes	Ank	2673.33	6104	87.4097	204.869	1.22884	1.15544e-29	4.43026e-28	yes
Mapk8ip3	8407	1292	220.153	27.9917	-2.97544	3.94191e-113	1.50416e-111	yes	Tnfaip8l2	28	475.667	3.38367	49.4273	3.86865	3.99606e-54	1.52735e-52	yes	Ache	73.6667	375.667	3.83867	20.1853	2.39463	1.27138e-29	4.8645e-28	yes
Arhgap30	73.6667	1366	2.22133	34.7417	3.96717	9.75452e-113	3.71432e-111	yes	Mylk	267.333	1675.67	6.219	38.685	2.63702	4.34686e-54	1.65794e-52	yes	Ssc5d	258	1110.33	6.742	29.7303	2.14069	1.28987e-29	4.92487e-28	yes
Ntm	1524.67	97	89.4573	5.87467	-3.92862	1.09526e-112	4.16176e-111	yes	Stau2	2989	624.667	137.858	28.9947	-2.24932	4.85049e-54	1.84614e-52	yes	Fbxo2	333.333	1258	29.6147	114.37	1.94933	1.29398e-29	4.93018e-28	yes
Rasl10b	1959.67	119.667	88.555	4.35333	-4.34638	1.10261e-112	4.18091e-111	yes	Mcl1	1201.33	4917.67	47.2643	168.747	1.83604	7.78028e-54	2.95066e-52	yes	Capn3	35.3333	358.333	1.96233	22.1757	3.49834	1.70402e-29	6.47886e-28	yes
Rap1b	1165.67	7511.67	57.585	315.48	2.45378	1.35556e-112	5.12927e-111	yes	Cadps	5833.67	922	154.631	26.4163	-2.54933	7.78504e-54	2.95066e-52	yes	Kcna2	346.333	1398	3.49067	14.343	2.03877	1.82155e-29	6.91123e-28	yes
Syngr3	1365.67	87.6667	93.6413	5.09567	-4.1998	1.81681e-112	6.86027e-111	yes	Ralyl	808.333	101	77.825	9.72267	-3.00081	7.92571e-54	2.99771e-52	yes	Tspan3	1935.33	4380	142.345	330.188	1.2139	2.22391e-29	8.42021e-28	yes
Cyth4	181.333	2545	9.77333	121.094	3.63114	2.25129e-112	8.48314e-111	yes	Gm49369	21	434	3.47933	61.5517	4.14492	9.09222e-54	3.43175e-52	yes	Selenoh	719.333	196.333	117.702	31.835	-1.88645	2.52562e-29	9.54263e-28	yes
Rab8b	701.333	3628	19.9623	87.543	2.13271	3.66407e-112	1.3778e-110	yes	Ccn1	77	952.333	5.135	55.7173	3.43969	1.29906e-53	4.89296e-52	yes	P2ry12	343	925	18.4747	54.523	1.56132	2.54563e-29	9.59826e-28	yes
Pcsk1n	4210.67	316.667	256.85	16.3633	-3.97239	3.96115e-112	1.48642e-110	yes	Myof	211	2482.67	5.29433	53.4097	3.33458	1.45198e-53	5.45759e-52	yes	Cdca5	223.333	30	12.607	1.73833	-2.85845	2.87242e-29	1.08079e-27	yes
Mllt11	4657.67	512	327.27	32.5637	-3.32915	4.39237e-112	1.64482e-110	yes	Efemp2	223.667	1476	20.041	109.499	2.44989	1.53808e-53	5.76925e-52	yes	Ptprz1	1252	2814	21.5413	51.2913	1.25161	2.9354e-29	1.1022e-27	yes
Dpp10	1223.67	50	34.9507	1.097	-4.99368	6.39439e-112	2.38957e-110	yes	Lat2	46.6667	749	5.96333	54.759	3.19891	1.62586e-53	6.08591e-52	yes	Fads1	1766.33	4014	58.5293	136.691	1.22369	3.57638e-29	1.34011e-27	yes
Anxa4	219.667	2720.67	15.175	169.956	3.4854	7.25549e-112	2.70577e-110	yes	Tnc	191	2088.67	3.65567	34.4827	3.23766	1.66725e-53	6.22688e-52	yes	Zbtb47	599.667	1488	11.2097	28.1843	1.33015	4.17912e-29	1.56273e-27	yes
Camk2g	4797	660.333	278.004	30.2183	-3.20161	8.49634e-112	3.162e-110	yes	Tcn2	627.333	3796.33	42.7837	225.089	2.39536	1.6704e-53	6.22688e-52	yes	Ccl2	837.667	209	117.357	30.007	-1.96754	4.19634e-29	1.56594e-27	yes
Kcnt1	1078.67	36.6667	28.5043	0.827667	-5.10599	1.21092e-111	4.49732e-110	yes	Apod	14857.7	71143	1427.88	5889.93	2.04437	1.71939e-53	6.39633e-52	yes	Ncapd2	969	290.667	25.1493	7.57367	-1.73146	5.73491e-29	2.1357e-27	yes
Slc6a17	2971	219.333	64.0293	3.98633	-4.0056	1.90744e-111	7.06963e-110	yes	Cd300lf	8	484.333	0.595	30.689	5.68869	1.81435e-53	6.73577e-52	yes	Tmpo	2411.67	1059.33	87.9853	39.3443	-1.16111	6.30228e-29	2.34217e-27	yes
Man2b1	736	6097.67	26.45	189.691	2.84231	6.59568e-111	2.43959e-109	yes	Clec5a	29	457.333	1.61267	22.9623	3.83175	2.38555e-53	8.83824e-52	yes	Plxdc2	1336.67	2907	45.5513	94.5693	1.05388	7.44435e-29	2.75914e-27	yes
Socs3	54	1544.33	2.862	69.123	4.59407	7.43314e-111	2.74374e-109	yes	Herc3	1768	384.667	65.9907	12.341	-2.4188	2.97976e-53	1.10172e-51	yes	Iqgap3	567	160.333	12.8317	4.411	-1.54053	7.45467e-29	2.75914e-27	yes
Hoxb8	2194.33	166	141.013	8.04733	-4.13117	8.99694e-111	3.31421e-109	yes	S1pr3	173.667	2281.33	5.26933	59.8127	3.50476	4.29069e-53	1.58319e-51	yes	Ttk	230	31.3333	9.192	1.29	-2.83301	7.62051e-29	2.81478e-27	yes
Apba1	3423	555	69.589	9.594	-2.85865	2.58336e-110	9.49699e-109	yes	Plat	1147.67	5465.67	61.2633	252.893	2.04543	4.68726e-53	1.726e-51	yes	Mybl2	250.667	39.3333	8.00967	1.327	-2.59357	1.00242e-28	3.69509e-27	yes
D430041D05Rik	1297	93.3333	15.8423	0.957	-4.04912	2.83371e-110	1.03962e-108	yes	Bmerb1	3280	725.333	185.477	36.127	-2.36009	4.93517e-53	1.8136e-51	yes	Ercc6l	285	35	6.15267	0.78	-2.97967	1.02091e-28	3.75561e-27	yes
Wnk2	1330.67	59.3333	32.556	1.40433	-4.53497	3.05053e-110	1.1169e-108	yes	Osmr	117.667	1441	2.91867	30.9227	3.40528	4.95224e-53	1.81619e-51	yes	Ddx39a	993.333	335.667	67.971	23.5903	-1.52672	1.02713e-28	3.77084e-27	yes
Rapgef4	2468.67	335	88.9467	9.748	-3.18976	4.2999e-110	1.57116e-108	yes	Fbxo41	865.667	108.667	18.1247	1.98867	-3.18808	7.21818e-53	2.64185e-51	yes	Eef1a2	625.667	2105.33	34.2347	119.081	1.79841	1.04988e-28	3.8466e-27	yes
Ptbp3	394.667	4030.67	8.611	74.301	3.10913	4.68247e-110	1.7075e-108	yes	Neurl3	24.6667	434.667	1.324	20.0907	3.92355	7.48814e-53	2.73513e-51	yes	C6	25.6667	404.333	1.044	16.656	3.99585	1.07543e-28	3.93227e-27	yes
Nbea	2436	417	40.603	5.726	-2.82599	6.71782e-110	2.44477e-108	yes	Bmp1	344.667	2410.33	12.2383	74.3197	2.60234	8.96029e-53	3.26627e-51	yes	Pnma8b	290.667	1003.67	7.97033	28.312	1.8287	1.41251e-28	5.15437e-27	yes
Tmem106a	41.6667	1331.67	3.174	87.8877	4.79129	9.86312e-110	3.58221e-108	yes	Naip2	40.3333	508.667	1.16967	12.91	3.46432	9.41291e-53	3.42437e-51	yes	Kif18b	320.333	56	10.9817	1.96267	-2.48421	1.63221e-28	5.94412e-27	yes
Pnkd	6285	473	326.762	49.5027	-2.72266	1.5359e-109	5.5671e-108	yes	Arhgap45	123	1143.33	4.205	33.9077	3.01143	1.11624e-52	4.05269e-51	yes	Pvr	643.667	197	25.244	7.96	-1.6651	1.78098e-28	6.47291e-27	yes
Slc7a10	1272.33	12.3333	91.5763	1.01133	-6.50064	1.97007e-109	7.12653e-108	yes	Gabrb3	2049	427.333	49.6393	9.044	-2.45645	1.17382e-52	4.25321e-51	yes	Cybrd1	167.667	575.667	3.59233	12.65	1.81614	1.87105e-28	6.78666e-27	yes
Slc7a8	196.667	2751.67	6.50333	76.7237	3.56042	2.20279e-109	7.95246e-108	yes	Olfml3	478.333	3453	11.8267	74.337	2.65204	1.37828e-52	4.9841e-51	yes	Timp1	3404.33	1202.33	450.171	164.102	-1.45588	2.07224e-28	7.50144e-27	yes
Fyb1	71.3333	1192.67	6.585	76.3017	3.53446	2.99055e-109	1.07749e-107	yes	Rims1	1159.33	109.333	28.3253	2.62433	-3.43207	1.94911e-52	7.03428e-51	yes	Cadm4	2329	5774.67	123.113	312.875	1.34561	2.17394e-28	7.85391e-27	yes
Sorl1	6023	1029.33	75.4273	11.0183	-2.77518	3.88861e-109	1.39828e-107	yes	Kng2	7.66667	683.333	0.682	51.2007	6.23025	1.99207e-52	7.17502e-51	yes	Exo1	188.667	19.3333	8.48	0.702667	-3.59315	2.92493e-28	1.0546e-26	yes
Lat2	46.6667	1741.33	5.96333	124.345	4.38209	4.33747e-109	1.55658e-107	yes	Unc5a	571.667	69	19.6773	2.06067	-3.25535	3.5458e-52	1.27459e-50	yes	Sgo1	215.667	25	6.76967	0.812667	-3.05835	2.93548e-28	1.05631e-26	yes
Hcls1	125.667	1426.33	8.36933	80.9233	3.27337	4.73253e-109	1.69499e-107	yes	Tax1bp3	212.667	1376	18.899	105.727	2.48396	3.61203e-52	1.29582e-50	yes	Tnfrsf19	472.333	1458	13.897	43.294	1.63939	3.95158e-28	1.41913e-26	yes
Ablim2	1672.67	171.667	75.7153	8.09633	-3.22524	6.51879e-109	2.33015e-107	yes	Kcnk9	2472.67	321.667	27.0473	3.073	-3.13777	3.73653e-52	1.33784e-50	yes	Rdh10	1401.33	418.667	44.8093	13.7013	-1.70948	4.21791e-28	1.51178e-26	yes
Acss2	1950.33	241	91.162	9.642	-3.24103	6.57771e-109	2.34657e-107	yes	Sgk1	623.333	3427.33	35.412	203.323	2.52146	3.9167e-52	1.39958e-50	yes	Susd4	78.3333	368	3.20467	15.463	2.27057	4.62294e-28	1.65368e-26	yes
Ifi202b	20.3333	839.667	1.59533	56.729	5.15216	8.8121e-109	3.13749e-107	yes	Pik3cg	74.3333	621.667	1.967	13.3193	2.75945	5.42214e-52	1.93372e-50	yes	Tmem229a	220.333	863.333	4.88867	19.7747	2.01614	5.40808e-28	1.93073e-26	yes
Palld	187	1690	5.703	45.2667	2.98866	9.56628e-109	3.39932e-107	yes	Ssc5d	56	1110.33	1.75067	29.7303	4.08596	6.33535e-52	2.25496e-50	yes	Klhdc8b	55.6667	336.667	2.86567	18.7707	2.71154	5.5539e-28	1.97889e-26	yes
Il7r	17	1201	0.643667	38.4743	5.90144	1.63353e-108	5.79326e-107	yes	Rab3c	1861	252	34.938	4.088	-3.09533	9.75413e-52	3.46501e-50	yes	Depdc1a	223.333	27.6667	10.813	1.20633	-3.16407	5.93394e-28	2.11016e-26	yes
Ptafr	27.3333	1162.33	1.01633	36.287	5.15801	1.85889e-108	6.5796e-107	yes	Fstl5	670.333	64.6667	19.1853	1.56133	-3.61915	9.80799e-52	3.47733e-50	yes	Ezh2	618.667	190	28.9823	9.67933	-1.58219	6.35685e-28	2.25612e-26	yes
Kif1a	22012.7	3767	411.525	58.1563	-2.82297	3.33683e-108	1.17878e-106	yes	Ifi203	49.3333	603.667	2.03667	21.064	3.3705	1.07895e-51	3.81784e-50	yes	Sema3b	868	2311	37.149	97.19	1.38748	6.65079e-28	2.35583e-26	yes
Impact	4699.33	911.333	185.918	29.3567	-2.66291	4.49135e-108	1.58353e-106	yes	Ggta1	89	902.333	3.95033	31.096	2.97668	1.09551e-51	3.86889e-50	yes	Rfx4	98	574.667	3.20467	19.6143	2.61366	6.6845e-28	2.36316e-26	yes
Cnr1	874	28.6667	20.365	0.565333	-5.17085	5.71019e-108	2.00934e-106	yes	Srgn	223	1688	32.8387	207.171	2.65735	1.10572e-51	3.89736e-50	yes	Rell2	48.6667	308	3.20667	20.3387	2.66508	7.7762e-28	2.74376e-26	yes
Adarb1	3747.33	518	76.2603	9.04267	-3.07611	6.86022e-108	2.40934e-106	yes	Lynx1	7758.33	1837.67	259.887	53.571	-2.27836	1.23692e-51	4.35131e-50	yes	Slc20a1	3368	1107.33	116.267	39.488	-1.55796	7.86963e-28	2.77133e-26	yes
Cpne6	1186	24.6667	77.248	1.51833	-5.66894	7.21148e-107	2.52779e-105	yes	Ifnar2	368	1897.33	35.048	142.011	2.0186	1.44493e-51	5.07323e-50	yes	Matn4	376.667	1053	18.6803	53.7343	1.52432	1.13469e-27	3.98812e-26	yes
Zfp612	1252.33	57	35.7683	1.34233	-4.73587	7.89752e-107	2.76291e-105	yes	Lilrb4b	7.33333	432.667	0.751667	36.2093	5.59012	1.46294e-51	5.12652e-50	yes	Lrrfip1	1723	683	63.4337	26.9877	-1.23295	1.23388e-27	4.32836e-26	yes
Ntrk2	6841	1167.33	140.405	27.648	-2.34434	1.14308e-106	3.99127e-105	yes	Anxa1	167	1913	13.592	133.906	3.30039	1.55122e-51	5.42537e-50	yes	Ube2ql1	91.3333	390.333	3.899	17.16	2.13787	1.27143e-27	4.45149e-26	yes
Cacna2d3	988.667	44.3333	36.6357	1.65967	-4.46428	1.26829e-106	4.41995e-105	yes	Hecw1	1724.33	182.333	30.433	3.07167	-3.30854	1.6362e-51	5.71157e-50	yes	Srebf1	990.667	3344.67	28.2113	100.67	1.83529	1.27416e-27	4.45243e-26	yes
Ctsa	2058.33	15564.3	132.431	894.548	2.75592	2.75934e-106	9.59773e-105	yes	Brsk2	1997.33	379.333	84.704	14.0493	-2.59193	1.79608e-51	6.2576e-50	yes	Pmp22	7178.33	18530.3	469.062	1246.97	1.41058	1.59774e-27	5.57242e-26	yes
Lrp11	2274	313	100.624	11.4717	-3.13283	3.01767e-106	1.04761e-104	yes	Tnk2	4932.33	1132.67	154.299	33.385	-2.20846	1.92978e-51	6.71051e-50	yes	Csf3r	682.667	1958	24.2067	70.272	1.53755	1.6406e-27	5.71094e-26	yes
Nrip3	1623.67	94	62.1133	2.77767	-4.48296	3.21765e-106	1.1149e-104	yes	Gria4	2491.33	545	85.9647	13.7093	-2.64859	1.98489e-51	6.88895e-50	yes	Ogdhl	282.667	825	8.641	25.9893	1.58865	1.64728e-27	5.7232e-26	yes
Tmem255a	1949	197.667	78.9077	6.69233	-3.55958	3.47979e-106	1.20342e-104	yes	Peg10	1117.67	222.667	22.843	3.953	-2.53073	2.46948e-51	8.5544e-50	yes	Gjc3	828.667	1929.67	23.7097	56.6397	1.25634	1.83797e-27	6.36133e-26	yes
Ptpn5	1326.33	121.333	56.5803	4.397	-3.68571	3.51828e-106	1.21441e-104	yes	Mrap2	569.333	62.3333	37.779	3.70033	-3.35186	2.60649e-51	9.00773e-50	yes	Nasp	1111.33	416.667	59.993	23.3287	-1.36269	1.87602e-27	6.48065e-26	yes
Arhgap25	50.6667	855.667	2.34933	35.3047	3.90954	9.15651e-106	3.15455e-104	yes	Nefm	26849.3	4281.67	1077.55	151.814	-2.82738	2.61029e-51	9.00773e-50	yes	Gjb3	157.667	4.66667	9.84733	0.310333	-4.98784	2.14441e-27	7.39372e-26	yes
Slc4a4	5708.67	731	120.683	11.4857	-3.39331	1.14063e-105	3.92215e-104	yes	Gdap1	1956.33	268.667	66.607	8.05	-3.04861	2.89807e-51	9.98183e-50	yes	Prnd	204.667	15.6667	9.42067	0.853333	-3.46465	2.44289e-27	8.40689e-26	yes
Rgs17	1547	101.333	25.6703	1.75767	-3.86837	1.83075e-105	6.28327e-104	yes	Tbc1d30	950.333	182	23.5677	4.093	-2.52558	3.05527e-51	1.05033e-49	yes	Pbxip1	1930	5083	58.632	156.957	1.42061	2.77908e-27	9.54572e-26	yes
Fam135b	849	43.6667	6.493	0.269	-4.59321	3.48649e-105	1.19432e-103	yes	Rcn1	320	1607	15.8637	69.3457	2.12808	3.1558e-51	1.08283e-49	yes	Itpkb	2083.33	6092.33	38.0023	113.983	1.58466	2.87074e-27	9.84192e-26	yes
Mcm2	147.333	1304	5.86267	44.1733	2.91355	3.58067e-105	1.22426e-103	yes	Myt1l	1082	110.333	27.7013	3.03233	-3.19146	3.16926e-51	1.0854e-49	yes	Dbi	3515.67	8298.33	705.411	1712.8	1.27983	3.25528e-27	1.11392e-25	yes
Clec4n	9	1657.33	1.02	155.151	7.24896	3.60302e-105	1.22958e-103	yes	Mgst1	390.333	1882.33	54.9687	229.367	2.06098	3.55205e-51	1.2142e-49	yes	Tmem176b	1953.67	4730.33	190.064	466.639	1.29582	3.46205e-27	1.18244e-25	yes
Pfkm	6743.33	755	313.171	30.5017	-3.35999	5.02546e-105	1.71178e-103	yes	Prcp	241	1439	11.793	60.6637	2.3629	3.58912e-51	1.22456e-49	yes	Itm2c	5567.33	13993.3	284.034	734.39	1.37048	4.3642e-27	1.48777e-25	yes
Cd38	287.667	2181.33	11.7673	76.263	2.6962	8.21759e-105	2.79383e-103	yes	Sgip1	1454.67	276.333	61.5983	10.6853	-2.52726	3.99813e-51	1.36154e-49	yes	Col9a2	53.6667	292.667	2.087	11.7477	2.49287	5.50301e-27	1.87247e-25	yes
Birc5	19	768.333	2.66367	89.265	5.06661	9.73726e-105	3.30428e-103	yes	Slc7a10	1272.33	144.667	91.5763	9.475	-3.27278	4.15821e-51	1.4134e-49	yes	Notch4	559.333	141.333	9.705	2.51367	-1.94893	5.77574e-27	1.96159e-25	yes
Mob1a	719.333	4063	22.818	105.845	2.2137	1.01761e-104	3.44673e-103	yes	Ggt5	59.3333	567	2.29967	20.9237	3.18564	5.20853e-51	1.7671e-49	yes	Col22a1	25.3333	222.667	0.597	4.04333	2.75974	5.89174e-27	1.99724e-25	yes
Camk2n2	1398.33	100.333	144.643	8.878	-4.02611	1.07887e-104	3.64737e-103	yes	Rimkla	1831.67	273	59.9627	7.87733	-2.92829	5.36508e-51	1.81681e-49	yes	Gpld1	275.667	1236.67	5.95167	27.7823	2.2228	5.99321e-27	2.02785e-25	yes
Fam163b	910	20.3333	41.5383	0.778333	-5.73791	1.29236e-104	4.361e-103	yes	Scg2	4835	901.667	270.224	43.871	-2.62282	5.64538e-51	1.90816e-49	yes	Lxn	1101.67	3018.33	112.901	318.457	1.49604	6.12778e-27	2.06952e-25	yes
Cyfip2	10190	1746	241.523	32.1043	-2.91132	2.62388e-104	8.83765e-103	yes	Bcl2l11	108.667	967	3.00867	23.4977	2.96532	5.70907e-51	1.92609e-49	yes	Bcl6b	403.667	72.3333	13.5903	2.507	-2.43855	6.54468e-27	2.20621e-25	yes
Acsl3	4309.67	622.333	204.115	23.9103	-3.09367	2.72724e-104	9.1687e-103	yes	Ltbr	226.667	1338	14.4683	74.2667	2.35982	6.52352e-51	2.19678e-49	yes	Rtn1	804	2197.67	57.5223	139.234	1.27531	6.99999e-27	2.35532e-25	yes
Ptpn6	132.333	1832.33	8.225	94.6163	3.524	3.39337e-104	1.1387e-102	yes	Rnase4	253.333	2306.67	22.5523	178.957	2.98826	7.66933e-51	2.57784e-49	yes	Itgam	7076.67	3406.67	174.116	85.861	-1.01997	7.02764e-27	2.36025e-25	yes
Kif21a	4510	596.667	117.228	12.8863	-3.1854	3.77936e-104	1.26587e-102	yes	Tpm4	729.667	3437.67	45.4257	186.856	2.04034	8.13314e-51	2.72783e-49	yes	Bmp6	456.667	1420.33	14.535	46.7973	1.6869	7.51168e-27	2.51815e-25	yes
Cldn10	1116	20.3333	81.4553	1.32467	-5.94231	4.0309e-104	1.34763e-102	yes	Ksr2	563.333	69.6667	5.76	0.622	-3.21108	8.14569e-51	2.72783e-49	yes	Pgap6	1244.67	190.333	47.1873	7.221	-2.70813	8.20354e-27	2.74501e-25	yes
Ttbk1	2349.67	291.333	40.39	4.15933	-3.27957	4.33233e-104	1.44574e-102	yes	Nxph1	702	97.3333	35.3583	4.203	-3.07256	8.83498e-51	2.9532e-49	yes	Stil	202	22	4.397	0.516	-3.09108	9.1606e-27	3.05961e-25	yes
Cpeb3	1302.33	145	44.144	4.181	-3.4003	4.4965e-104	1.49604e-102	yes	Rin3	69.3333	744.667	2.48	23.0497	3.21633	1.12416e-50	3.75071e-49	yes	P4ha3	174.667	687.667	8.74767	34.1407	1.96452	9.20264e-27	3.068e-25	yes
Dnase2a	73	1368	6.642	99.472	3.9046	4.49962e-104	1.49604e-102	yes	Pnck	802	125.333	71.7803	9.93367	-2.85319	1.33779e-50	4.45529e-49	yes	Lamb2	1779	5933	43.2023	142.283	1.71959	1.01036e-26	3.36218e-25	yes
Trnp1	1402	43.6667	113.229	3.065	-5.20721	6.07254e-104	2.0153e-102	yes	Lpxn	25	456.333	2.03367	31.6347	3.95935	1.80287e-50	5.99312e-49	yes	Jpt2	1523	609.667	65.5093	26.926	-1.2827	1.016e-26	3.37476e-25	yes
Tent5c	128	2238.67	3.055	45.677	3.90222	8.47466e-104	2.80735e-102	yes	Slitrk1	890.667	127.333	22.2237	2.79367	-2.99187	2.0629e-50	6.84497e-49	yes	Tpm1	7904.67	3833	529.057	263.297	-1.00673	1.10592e-26	3.66672e-25	yes
Adamts1	311	2986.67	9.85033	76.153	2.95066	8.65482e-104	2.86179e-102	yes	Synj1	5000	1279.33	166.381	46.642	-1.83479	2.15684e-50	7.14359e-49	yes	Scara3	1587.33	4947.33	50.266	160.559	1.67545	1.14837e-26	3.80053e-25	yes
Sv2c	8592.33	758	126.372	9.67267	-3.70762	9.89976e-104	3.26746e-102	yes	Ticam2	18.3333	363.333	0.590667	10.1317	4.10038	2.34125e-50	7.74023e-49	yes	Acot11	282	895	6.63133	19.0727	1.52414	1.19331e-26	3.94206e-25	yes
Ppp1r18	204	1836.33	12.1913	86.709	2.83033	1.06392e-103	3.50511e-102	yes	Pdlim4	163	1044.67	18.512	103.357	2.48111	2.52785e-50	8.34189e-49	yes	Espl1	349.667	81	6.29933	1.75	-1.84784	1.39841e-26	4.61119e-25	yes
Habp4	4118.67	490.667	211.584	20.8677	-3.34189	1.45942e-103	4.79936e-102	yes	Resp18	2563	383.333	458.424	60.4833	-2.92207	2.63496e-50	8.67957e-49	yes	Col4a5	782.667	2523	15.7843	55.615	1.81698	1.41607e-26	4.66097e-25	yes
Myh9	1599.33	13677.3	28.98	210.796	2.86272	1.51805e-103	4.98313e-102	yes	Cep170b	3371	876	73.852	16.3033	-2.17947	2.7771e-50	9.13118e-49	yes	Rgs6	24.3333	197	0.801667	6.86967	3.09917	1.5387e-26	5.05542e-25	yes
Slfn2	61	1211.67	4.93767	83.3503	4.07729	2.91019e-103	9.53562e-102	yes	Cbarp	2166.33	418	102.224	17.362	-2.55773	2.78694e-50	9.14691e-49	yes	Tlr13	3271	1093.33	91.8113	31.5463	-1.5412	1.60549e-26	5.26532e-25	yes
P2ry6	60	1155	4.121	67.4593	4.03295	3.58799e-103	1.17353e-101	yes	Mertk	205	1367	6.35933	37.1623	2.54689	2.86967e-50	9.40141e-49	yes	Eif4a1	17191	8343.33	1197.88	579.425	-1.0478	1.60918e-26	5.26788e-25	yes
Frmpd3	839	17.6667	15.4087	0.279	-5.78733	4.08246e-103	1.33284e-101	yes	Flna	1098.67	8697.67	18.6907	122.63	2.71392	3.62485e-50	1.18541e-48	yes	Pdk2	362.667	1099.33	18.365	57.3517	1.64288	1.7787e-26	5.81234e-25	yes
Bub1b	16.6667	821.667	0.613	25.705	5.39002	4.14053e-103	1.34936e-101	yes	Dync1i1	2722	389	138.71	17.6137	-2.97731	3.9168e-50	1.27857e-48	yes	Topbp1	1371	453	34.743	10.593	-1.71361	1.96193e-26	6.39957e-25	yes
Dusp6	354	2404.33	17.0423	98.025	2.52403	5.63797e-103	1.83406e-101	yes	Nap1l3	1106.67	174	52.496	7.24367	-2.85742	4.05949e-50	1.32276e-48	yes	Mras	1046.67	2640.33	45.874	102.803	1.16413	2.17592e-26	7.08482e-25	yes
Nfam1	108.333	1301	3.72067	40.7177	3.45202	6.90476e-103	2.24213e-101	yes	6430548M08Rik	4505.33	1260.33	110.856	26.653	-2.05632	4.09941e-50	1.33338e-48	yes	Cd180	2762.33	1035.33	121.873	47.6047	-1.35621	2.1943e-26	7.13185e-25	yes
Hs6st2	924	60	28.7287	1.58767	-4.17751	8.09827e-103	2.62497e-101	yes	Pcsk2	2593.67	360	74.1053	8.99067	-3.04308	4.76502e-50	1.54709e-48	yes	Cenpn	230.667	37	15.0317	2.44367	-2.62089	2.41144e-26	7.82359e-25	yes
Rtn2	1324.33	99	102.683	8.96867	-3.51716	1.58858e-102	5.14001e-101	yes	Lamc1	1046	7899.33	18.5013	128.907	2.80063	4.91779e-50	1.59384e-48	yes	Slc22a4	132.667	583.333	6.62133	30.2147	2.19006	2.73377e-26	8.85351e-25	yes
Resp18	2563	70.3333	458.424	10.601	-5.43441	2.39224e-102	7.72652e-101	yes	Col11a1	96.3333	1480.67	1.916	26.3073	3.7793	5.08858e-50	1.64625e-48	yes	Eif2s1	2088.33	848	70.3577	29.27	-1.26528	2.74343e-26	8.86895e-25	yes
Aqp4	11342	1124.67	318.444	26.6487	-3.5789	5.16255e-102	1.66444e-100	yes	Plcb4	1463.33	336.333	50.8253	11.9953	-2.08307	6.59018e-50	2.12824e-48	yes	Chgb	80.3333	1799	3.29233	77.6277	4.55939	2.89504e-26	9.34244e-25	yes
Blnk	38.3333	829.667	2.481	45.224	4.18809	6.02046e-102	1.93758e-100	yes	Ttc3	11241	3143	384.376	105.389	-1.86679	8.94748e-50	2.88437e-48	yes	Cnp	8170.33	19502.3	396.138	968.337	1.28951	3.49303e-26	1.12521e-24	yes
Fndc5	2072.33	64	99.9507	2.63867	-5.24334	6.84629e-102	2.19945e-100	yes	Cnn3	3407	11262.3	233.997	688.609	1.5572	1.01236e-49	3.25771e-48	yes	Vegfa	921.667	299.667	34.568	12.6423	-1.45117	3.61239e-26	1.1616e-24	yes
Caly	779	21.6667	104.284	2.46033	-5.40552	8.09055e-102	2.59457e-100	yes	Ank1	4947.67	673.333	86.6443	11.3573	-2.93148	1.0342e-49	3.32211e-48	yes	Arhgap11a	801.333	246	18.901	5.921	-1.67455	3.81306e-26	1.22396e-24	yes
Eif5a2	2275.67	341.333	60.7447	7.77967	-2.96498	1.49591e-101	4.78876e-100	yes	Slc17a6	3427.67	365.333	111.612	10.4637	-3.41503	1.36341e-49	4.37184e-48	yes	Kcns1	10	156.333	0.421	6.792	4.01194	3.92417e-26	1.2574e-24	yes
Tm4sf1	343.333	4328.67	30.9017	340.549	3.46211	1.66613e-101	5.32424e-100	yes	Csf1	785.667	3354.67	28.2513	106.087	1.90886	1.44459e-49	4.62396e-48	yes	Kcnc1	47	271	1.14633	7.76333	2.75965	4.07454e-26	1.30328e-24	yes
Cd48	35.3333	902	4.02167	86.5137	4.42706	1.80823e-101	5.76814e-100	yes	Camk2n2	1398.33	245.667	144.643	22.3393	-2.69484	1.88498e-49	6.02295e-48	yes	Map1a	4609.67	9664.67	51.1843	109.496	1.09711	4.93155e-26	1.57462e-24	yes
Rab9b	773.333	31.6667	26.2483	0.913667	-4.84441	1.83107e-101	5.83073e-100	yes	Matn4	207.333	1053	12.12	53.7343	2.14845	2.07992e-49	6.63415e-48	yes	Actg2	247.667	31.6667	21.9537	2.845	-2.94796	5.8452e-26	1.86307e-24	yes
Adora1	3493.67	553.333	103.766	13.921	-2.89799	6.84478e-101	2.17577e-99	yes	Ptx3	10	374.667	0.720667	23.0267	4.99783	3.00959e-49	9.58255e-48	yes	Unc80	66.6667	367.333	0.729333	4.66733	2.67795	6.39112e-26	2.0335e-24	yes
Baz1a	37.6667	875	1.08933	19.5483	4.16553	6.86843e-101	2.17946e-99	yes	Ifngr1	369	1780.67	23.457	98.8553	2.0753	3.19202e-49	1.01456e-47	yes	Septin4	1688.67	4048.67	133.617	317.412	1.24825	6.70356e-26	2.12917e-24	yes
Irf8	118.333	1424	5.55533	57.297	3.36651	7.90257e-101	2.50322e-99	yes	Mmp19	61.3333	864.333	2.96867	33.4583	3.49448	3.20517e-49	1.01695e-47	yes	Ddr1	2361.33	6394.33	89.1393	263.202	1.56203	7.22514e-26	2.29082e-24	yes
Fbxo41	865.667	22.3333	18.1247	0.394667	-5.52118	1.18918e-100	3.76027e-99	yes	Clec7a	5	437	0.959333	72.5033	6.23987	3.3072e-49	1.04749e-47	yes	Gm49339	4084.67	1228	316.355	96.1557	-1.7181	7.49529e-26	2.37233e-24	yes
Hap1	2180.67	154.333	113.578	6.50533	-4.12592	1.21971e-100	3.85006e-99	yes	Fndc5	2072.33	375.667	99.9507	15.869	-2.655	3.895e-49	1.23151e-47	yes	Ptgr1	741.333	261	36.8037	13.315	-1.4668	7.9566e-26	2.51395e-24	yes
Ccdc80	229.333	2526	8.381	76.709	3.1942	1.33336e-100	4.20149e-99	yes	Cplx2	3437.67	758.667	93.9317	18.1243	-2.37368	4.21895e-49	1.33162e-47	yes	Jph3	63	323.333	2.00433	10.5053	2.38993	8.11253e-26	2.55876e-24	yes
Kcnd2	922.667	40.3333	24.1573	0.883	-4.7739	2.36975e-100	7.4542e-99	yes	Plcg2	168	1105.67	5.25433	29.983	2.51257	4.82124e-49	1.51907e-47	yes	Esd	4401.33	1703.33	571.912	213.832	-1.41931	8.36543e-26	2.63395e-24	yes
Apc2	2627	282	50.0513	3.962	-3.65911	2.72723e-100	8.56378e-99	yes	Adam23	5614.33	1323.67	123.051	27.1147	-2.18211	4.86637e-49	1.53063e-47	yes	Oplah	204.667	776	6.65433	24.7057	1.89248	8.54976e-26	2.68732e-24	yes
Sgip1	1454.67	125.667	61.5983	4.33033	-3.83034	3.24604e-100	1.01753e-98	yes	Snrpn	10869.3	2018	752.384	122.982	-2.61302	5.38693e-49	1.69142e-47	yes	Kcnn2	11.3333	165.667	0.400667	8.093	4.3362	8.96367e-26	2.81254e-24	yes
Plcg2	168	1343.67	5.25433	35.7773	2.76747	3.32072e-100	1.03913e-98	yes	Sphkap	1334	277.667	27.1113	5.04333	-2.42645	6.79126e-49	2.12867e-47	yes	Msi1	121.667	456.333	7.08033	24.591	1.79624	1.1449e-25	3.58615e-24	yes
Slitrk1	890.667	36.3333	22.2237	0.770333	-4.85047	3.48502e-100	1.08866e-98	yes	Gpsm3	54.6667	549.333	5.65233	49.3087	3.12492	7.20513e-49	2.2545e-47	yes	Hey1	204.667	661.333	9.61167	31.9267	1.7319	1.16085e-25	3.62985e-24	yes
Cabp1	930.667	54	120.475	6.368	-4.24175	3.61441e-100	1.12714e-98	yes	Evi2b	21.3333	390	1.579	24.602	3.96169	8.09401e-49	2.52826e-47	yes	Angptl4	1389.67	450.667	71.7883	23.3797	-1.6185	1.19441e-25	3.72836e-24	yes
Il2rg	32.3333	797.333	2.61333	56.2573	4.42808	5.83413e-100	1.81621e-98	yes	Plekho1	303	1567	31.6273	146.654	2.21317	8.51531e-49	2.65528e-47	yes	Col20a1	41.3333	260.333	1.06267	6.90567	2.70009	1.27995e-25	3.98853e-24	yes
Zfp469	69	1046.33	0.900333	9.812	3.44602	6.04898e-100	1.87986e-98	yes	Col26a1	29.6667	611	1.437	25.7833	4.16531	8.57604e-49	2.66962e-47	yes	Ndc80	263	38	13.5857	2.052	-2.72698	1.31181e-25	4.08078e-24	yes
Anxa3	280.333	3856.67	23.708	277.301	3.54801	7.53845e-100	2.33873e-98	yes	Clec12a	18.6667	526.667	1.57233	27.3067	4.11827	1.0137e-48	3.1477e-47	yes	Slco1c1	173.667	771.667	6.45433	31.0033	2.26408	1.3242e-25	4.11227e-24	yes
Ncf2	128.667	1810.33	7.915	85.5613	3.4343	7.56076e-100	2.34163e-98	yes	Cntnap2	2258.67	269	57.359	8.23367	-2.80041	1.01466e-48	3.1477e-47	yes	Apc2	282	830	3.962	14.0983	1.83122	1.44352e-25	4.47515e-24	yes
Rnf208	1193	86.6667	120.187	7.60033	-3.98308	1.90516e-99	5.89036e-98	yes	Sgtb	1102	218.333	49.9823	8.706	-2.52134	1.18553e-48	3.67151e-47	yes	Tnr	1263	2787.67	13.414	27.6767	1.04493	1.47e-25	4.54947e-24	yes
Rcn1	320	2208	15.8637	93.0413	2.55215	2.80162e-99	8.64727e-98	yes	Ptbp1	630.667	3407	33.3797	144.457	2.1136	1.22528e-48	3.78811e-47	yes	Carns1	145	524.333	5.44233	18.7077	1.78133	1.52618e-25	4.71531e-24	yes
Acta2	290.667	4540	21.4803	272.922	3.6674	4.32493e-99	1.33262e-97	yes	Palld	187	1125.33	5.703	30.4007	2.41431	1.26338e-48	3.89925e-47	yes	Smc2	882.333	253.333	18.6913	5.58033	-1.74395	1.53863e-25	4.74568e-24	yes
Ptbp1	630.667	5334.67	33.3797	217.952	2.70697	4.37239e-99	1.34495e-97	yes	Gfod1	1151	234	22.288	3.97267	-2.48809	1.40551e-48	4.33054e-47	yes	Kcnj10	4390.67	9098.67	92.7023	197.137	1.08852	1.60168e-25	4.93177e-24	yes
Gpr162	1222.67	95.3333	60.9467	4.03033	-3.91858	4.80031e-99	1.47408e-97	yes	Casp12	95.3333	738	5.161	38.2467	2.88961	1.41861e-48	4.36349e-47	yes	Gmnn	300	57.6667	36.287	7.07367	-2.35892	1.65158e-25	5.0768e-24	yes
Ckap2l	19.3333	716.667	0.824333	26.143	4.98705	5.72591e-99	1.75533e-97	yes	Ptbp3	394.667	2136.67	8.611	39.1223	2.18374	1.4534e-48	4.46291e-47	yes	Sidt1	37.6667	282.667	0.981	7.70367	2.97322	1.72709e-25	5.29992e-24	yes
Unc13c	1562.67	106	24.358	1.36467	-4.15778	5.75411e-99	1.76099e-97	yes	Adgre5	257	1308.33	11.7163	52.5647	2.16557	1.9852e-48	6.0856e-47	yes	Aldh1l1	376.667	1345.33	13.8553	50.922	1.87785	1.84539e-25	5.65339e-24	yes
Carmil2	843	23	26.8627	0.630333	-5.41334	9.44213e-99	2.88479e-97	yes	Dhrs1	1578.33	5951	143.623	470.788	1.71279	2.0191e-48	6.17906e-47	yes	Scn8a	125	482.667	3.09033	6.85	1.14834	1.90711e-25	5.83261e-24	yes
Krt222	762.333	24.6667	37.924	1.01467	-5.22403	1.07095e-98	3.26649e-97	yes	Gabrb2	398	33.6667	13.51	0.990667	-3.76948	2.83046e-48	8.64745e-47	yes	Tagln2	6483.67	2994	559.756	274.048	-1.03037	1.97203e-25	6.021e-24	yes
Mpped1	950.667	33	40.2003	1.199	-5.0673	1.16672e-98	3.55262e-97	yes	Msn	1880.33	9083.33	66.1717	276.839	2.06476	2.85806e-48	8.7171e-47	yes	Hnrnpab	7995.33	3978.33	504.049	249.818	-1.01269	2.01167e-25	6.13169e-24	yes
Cxcr4	59	1380.33	6.29333	119.827	4.25098	1.47527e-98	4.48459e-97	yes	Asah1	1033.33	3641	57.9007	162.095	1.48518	2.87335e-48	8.74899e-47	yes	Vamp2	997	2377.33	53.839	129.484	1.26605	2.05726e-25	6.26016e-24	yes
Ccdc184	867.333	35.3333	39.1997	1.343	-4.86731	1.53645e-98	4.66272e-97	yes	Vamp8	176.333	1022.67	28.6153	143.233	2.32351	3.23856e-48	9.84447e-47	yes	Plp2	2435	841.667	238.959	85.3213	-1.48578	2.14565e-25	6.51819e-24	yes
Tmem59l	3050.67	141.667	275.36	10.6843	-4.68775	2.36284e-98	7.15856e-97	yes	Lhfpl6	349.667	1803.33	22.4037	100.143	2.16025	4.9583e-48	1.50468e-46	yes	Hip1	3493.67	1432	71.2517	27.2553	-1.38639	2.20583e-25	6.68979e-24	yes
Cd300lf	8	1237	0.595	76.314	7.00291	2.80786e-98	8.49259e-97	yes	Mfsd12	512	2390.33	17.2377	70.371	2.02942	6.33399e-48	1.91894e-46	yes	Chaf1b	332.667	65.6667	19.9727	4.029	-2.30953	2.256e-25	6.83053e-24	yes
Pak1	5521.33	960	245.701	37.7927	-2.70072	2.81803e-98	8.50913e-97	yes	Fut9	1072.67	218	11.9733	2.11233	-2.50292	7.02284e-48	2.12409e-46	yes	Vcam1	626.667	1948	20.9407	67.2317	1.68283	2.37841e-25	7.18913e-24	yes
Cdip1	4046	727.333	216.927	32.082	-2.75738	2.88481e-98	8.69625e-97	yes	AB124611	6.33333	517.333	0.674667	46.3387	6.1019	7.40708e-48	2.23657e-46	yes	Stxbp1	878.333	2281.67	26.3983	72.467	1.45688	2.76874e-25	8.35504e-24	yes
Itgax	47	1465.33	1.57867	41.2543	4.70777	3.24817e-98	9.77532e-97	yes	Ppfia3	1474	227	43.0343	5.875	-2.87283	7.49998e-48	2.26085e-46	yes	Ncapg2	423.667	100.667	15.5383	2.53	-2.61862	2.91373e-25	8.77797e-24	yes
Alox5ap	94	1742.33	11.4663	165.654	3.85269	3.93293e-98	1.18164e-96	yes	Btk	27.3333	391.667	1.443	18.0217	3.64259	8.49604e-48	2.55686e-46	yes	Slfn9	687.667	189	15.1607	3.944	-1.9426	2.95399e-25	8.88451e-24	yes
Amigo1	1574.67	146.667	44.1557	3.594	-3.61894	6.36094e-98	1.90797e-96	yes	Asah2	1749.67	457.333	46.294	10.681	-2.11578	9.55629e-48	2.87117e-46	yes	Gpt2	676	1610.67	21.2107	51.8467	1.28946	3.01471e-25	9.05212e-24	yes
Rimkla	1831.67	77	59.9627	2.18767	-4.7766	6.55501e-98	1.96292e-96	yes	Stxbp5l	381	29	12.4567	0.814	-3.93575	9.6668e-48	2.89956e-46	yes	Caskin1	61.3333	361.333	1.21833	7.28133	2.57929	3.0722e-25	9.20948e-24	yes
Ankrd34b	907	9	31.0563	0.254667	-6.93013	7.16926e-98	2.14331e-96	yes	Zdbf2	509.333	64	6.06733	0.616333	-3.29928	1.52412e-47	4.56405e-46	yes	Col8a2	309.667	1505.67	8.655	40.4153	2.2233	3.16334e-25	9.46704e-24	yes
Col4a1	1180.33	22072.7	32.1933	429.765	3.73871	8.69693e-98	2.59573e-96	yes	Edem1	437.333	1992.67	10.0943	39.969	1.98534	1.88105e-47	5.62359e-46	yes	Slc6a9	566.667	1773.67	25.5863	82.9733	1.69727	3.19587e-25	9.54864e-24	yes
Rgs6	752	24.3333	28.0537	0.801667	-5.12904	9.97118e-98	2.97115e-96	yes	Nefh	24886	4287.33	833.01	126.835	-2.71538	1.92068e-47	5.73261e-46	yes	Dhfr	507.333	148.667	10.8267	3.27167	-1.72649	3.21465e-25	9.58895e-24	yes
Pirb	26.6667	1223	0.939333	36.1943	5.26798	1.05555e-97	3.1401e-96	yes	Mapk9	4892	1436.33	166.12	45.6847	-1.86245	2.12728e-47	6.3388e-46	yes	Chaf1a	557.333	188	14.8477	4.50433	-1.72085	3.48394e-25	1.03752e-23	yes
Ccn2	379.667	7843.33	22.394	377.516	4.07535	1.49956e-97	4.45363e-96	yes	Got1	5693	1441.67	373.095	82.993	-2.16848	2.1853e-47	6.50101e-46	yes	Tek	772.333	275.333	19.5043	7.19367	-1.439	3.53869e-25	1.05209e-23	yes
Ms4a7	11	934	1.20933	87.559	6.17797	2.13877e-97	6.34163e-96	yes	Zcchc18	3667.67	942.333	221.154	49.5387	-2.15842	2.25616e-47	6.69349e-46	yes	Fbln7	82.6667	388.333	3.227	15.579	2.27134	3.63461e-25	1.07884e-23	yes
Il4ra	187.333	3013.33	6.721	84.3023	3.64882	2.9508e-97	8.73504e-96	yes	Gpr22	369.667	27.6667	12.4253	0.735333	-4.07874	2.25739e-47	6.69349e-46	yes	Emcn	980.667	269.667	66.6803	17.7287	-1.91118	5.96698e-25	1.76825e-23	yes
Pnma8a	1165.33	57	38.3583	1.571	-4.60978	3.4578e-97	1.02192e-95	yes	Hsph1	4231	1131.67	155.422	36.369	-2.09541	2.50325e-47	7.41034e-46	yes	Chi3l1	280	1337	19.3863	94.2673	2.28172	6.66362e-25	1.96826e-23	yes
H6pd	161.667	2057	4.82633	51.4057	3.41293	3.55499e-97	1.04893e-95	yes	Egfr	243	1274.67	3.707	17.2393	2.21738	3.55558e-47	1.04955e-45	yes	Folh1	30.3333	262.333	1.16533	10.1453	3.122	6.74299e-25	1.98847e-23	yes
Pvalb	1531	42.3333	209.701	4.95267	-5.40399	4.88079e-97	1.43777e-95	yes	Trim66	510.667	54.3333	7.83367	0.694667	-3.49529	3.55701e-47	1.04955e-45	yes	Ube2s	1824	806.667	215.704	90.0333	-1.26052	7.06156e-25	2.07903e-23	yes
Tnfaip2	40	1116	1.76067	34.5113	4.29288	5.05766e-97	1.48745e-95	yes	Svop	1247.67	187.333	52.8263	7.02133	-2.91144	4.5162e-47	1.33041e-45	yes	Apold1	272.333	33.3333	8.614	1.09833	-2.97137	7.20403e-25	2.11572e-23	yes
P4hb	3329.33	22357.3	157.055	901.449	2.52097	5.17664e-97	1.51996e-95	yes	1700017B05Rik	203.667	1115.33	7.87567	34.512	2.13162	5.34383e-47	1.57166e-45	yes	Mgll	1019	2468.33	32.0177	78.2637	1.28947	7.20949e-25	2.11572e-23	yes
Arpc5	1030.67	5647	72.34	337.259	2.22099	5.55803e-97	1.6293e-95	yes	Mllt11	4657.67	995.333	327.27	62.7973	-2.38171	5.41829e-47	1.59097e-45	yes	Glrb	425.333	1091.33	18.838	43.4037	1.20417	7.37245e-25	2.16004e-23	yes
Gcnt1	48.3333	796.333	1.70967	26.0837	3.93136	7.98146e-97	2.33593e-95	yes	Lypd1	714.333	114	44.274	6.66733	-2.73128	5.47644e-47	1.60545e-45	yes	Clec4n	1657.33	358	155.151	34.698	-2.16075	7.40863e-25	2.16715e-23	yes
Podxl2	3278	345.667	215.265	19.1453	-3.49105	8.295e-97	2.42377e-95	yes	Mab21l2	438	33	26.356	1.74967	-3.91298	5.61595e-47	1.64369e-45	yes	Sphkap	57.6667	277.667	1.00033	5.04333	2.3339	7.46404e-25	2.17984e-23	yes
Septin11	671.333	4903.33	22.7633	136.91	2.58845	9.52564e-97	2.77887e-95	yes	Atp6v0e	332.667	1518	53.6267	214.721	2.00144	5.98922e-47	1.75011e-45	yes	Ptprd	859.333	2030	16.6097	34.213	1.04252	7.73928e-25	2.25658e-23	yes
Ms4a6c	33.6667	1579	2.47867	99.0957	5.32119	1.58712e-96	4.62258e-95	yes	Atp8a2	3889	553	67.4457	7.15533	-3.23663	6.18342e-47	1.80234e-45	yes	Plod2	2479	823.333	77.8433	26.4233	-1.55876	8.33881e-25	2.42749e-23	yes
Nek6	391.667	2383.67	23.33	112.722	2.27251	1.67585e-96	4.87317e-95	yes	Rbfox1	1606	250	73.8897	9.92667	-2.89599	6.18786e-47	1.80234e-45	yes	Cntf	272.667	780.667	29.2037	85.2867	1.54617	8.38053e-25	2.43572e-23	yes
Ahi1	3475.67	668	99.5237	16.4627	-2.59584	2.34159e-96	6.79812e-95	yes	Zfp36	121.667	836.667	5.92267	35.9773	2.60277	6.23598e-47	1.81344e-45	yes	Fzd3	574.667	1610.33	5.15967	14.85	1.52511	1.03961e-24	3.01568e-23	yes
Chn1	3058.33	505.667	158.108	24.8913	-2.6672	3.99674e-96	1.15848e-94	yes	B630019K06Rik	1152	226.667	59.6973	10.305	-2.53432	8.51137e-47	2.47116e-45	yes	Fbxo44	132.667	461.667	10.157	36.8483	1.85913	1.04092e-24	3.01568e-23	yes
Tmcc2	3682.67	555.667	146.614	19.1813	-2.93424	4.60898e-96	1.3338e-94	yes	Cntn4	573.667	72.6667	19.047	1.99367	-3.25607	9.03055e-47	2.6177e-45	yes	Cadps	246.333	922	8.05367	26.4163	1.71371	1.14292e-24	3.3059e-23	yes
Dlgap3	918	39	33.0413	1.11867	-4.88442	5.07596e-96	1.4666e-94	yes	Prrt2	1929.33	340.333	110.708	16.6813	-2.73046	9.09164e-47	2.6312e-45	yes	Cend1	290.667	913	19.233	62.2493	1.69447	1.16233e-24	3.35669e-23	yes
Btk	27.3333	706.667	1.443	31.778	4.46089	6.45238e-96	1.86131e-94	yes	Tmem35a	1205.67	249	84.1703	15.2147	-2.46785	1.02672e-46	2.96667e-45	yes	Ccn5	119	613.667	7.87867	41.621	2.40129	1.22922e-24	3.54422e-23	yes
Chrnb2	1125.33	75.6667	23.6623	1.40733	-4.07156	1.36858e-95	3.94165e-94	yes	Fam169a	700.333	94.6667	20.4787	2.38433	-3.10246	1.09137e-46	3.14846e-45	yes	Anxa1	5085.67	1913	347.31	133.906	-1.375	1.30382e-24	3.75335e-23	yes
Nova1	2170.33	329.667	42.81	6.27633	-2.76995	1.37297e-95	3.948e-94	yes	Epb41l1	9572.33	2367.67	176.894	45.477	-1.95968	1.38218e-46	3.98106e-45	yes	Raet1d	148.667	9.33333	13.4713	0.861333	-3.96718	1.43834e-24	4.13404e-23	yes
Elk3	148	1512.67	5.13567	46.6417	3.183	1.39639e-95	4.00897e-94	yes	Myo7a	55.3333	610	1.5	14.8813	3.31047	1.40273e-46	4.03385e-45	yes	Knl1	276	40.3333	4.40967	0.64	-2.78453	1.60952e-24	4.6187e-23	yes
Mertk	205	1892.33	6.35933	50.4203	2.98706	1.71452e-95	4.91452e-94	yes	Lmtk2	2128.33	538	35.18	7.76833	-2.17908	1.43256e-46	4.11311e-45	yes	Cd14	3012	1222	209.304	87.6963	-1.25501	1.73838e-24	4.9806e-23	yes
Fcgr4	7.66667	1012	0.816	92.1277	6.81892	2.14355e-95	6.13455e-94	yes	Kcnma1	1431.67	292.667	18.6937	4.23133	-2.14337	1.5886e-46	4.5539e-45	yes	Abca8b	90	357	1.41867	5.64233	1.99176	1.76533e-24	5.04986e-23	yes
Olfm3	685.667	17.6667	22.099	0.811	-4.76814	2.39101e-95	6.83194e-94	yes	Thbs2	701	5780	15.9963	114.445	2.83885	1.63924e-46	4.69165e-45	yes	Ap3s1	2459.33	1128	188.847	94.3077	-1.00177	1.84188e-24	5.26052e-23	yes
Gpx1	1389.33	8099	201.473	978.195	2.27954	2.89575e-95	8.2611e-94	yes	Myd88	82.6667	585.333	5.655	34.937	2.62716	1.79279e-46	5.12304e-45	yes	Ina	49.3333	329.333	1.76	11.954	2.76385	2.09113e-24	5.963e-23	yes
Ptprt	1987.67	126.333	22.6243	1.207	-4.22838	2.98735e-95	8.509e-94	yes	Fndc1	117.667	1045	3.357	24.4297	2.86339	1.89368e-46	5.4028e-45	yes	Cpe	7416.33	17545.3	399.36	970.801	1.28148	2.21645e-24	6.31044e-23	yes
Scpep1	367.333	3890	23.6587	212.439	3.16661	4.42623e-95	1.25876e-93	yes	Kcnd2	922.667	193.333	24.1573	4.40733	-2.45448	2.08407e-46	5.93664e-45	yes	Tmem176a	1372	3073.33	116.264	290.035	1.31882	2.36694e-24	6.72833e-23	yes
Ralyl	808.333	25.6667	77.825	4.201	-4.21143	4.51511e-95	1.28202e-93	yes	Sparc	16360.7	63674.7	1103.85	3355.44	1.60395	2.64248e-46	7.5155e-45	yes	Mapk8ip1	1730	3808.67	67.0207	150.6	1.16804	2.5849e-24	7.33642e-23	yes
Nell2	1808	155	81.441	5.834	-3.8032	6.2521e-95	1.77244e-93	yes	Elk3	148	940.333	5.13567	29.288	2.51169	3.52328e-46	1.00049e-44	yes	Spdl1	226.333	30	10.3433	1.422	-2.86271	2.65993e-24	7.53758e-23	yes
Cdk4	684	3620	49.4173	231.572	2.22837	6.49636e-95	1.83689e-93	yes	Steap2	1292.67	303	32.228	7.24	-2.15425	4.01546e-46	1.13847e-44	yes	Spc24	216.333	32	24.024	5.04867	-2.2505	2.94747e-24	8.33936e-23	yes
Cks1b	33.6667	734.333	5.37967	98.8903	4.20024	6.49974e-95	1.83689e-93	yes	Psmb8	91.3333	1221.67	12.0197	134.776	3.48709	4.12337e-46	1.16724e-44	yes	Dnajc27	208.667	605.333	5.442	15.2383	1.4855	3.02554e-24	8.54693e-23	yes
Nt5dc2	77.3333	1252.67	6.36867	84.1803	3.72442	6.57331e-95	1.85478e-93	yes	Rapgef4	2468.67	401.667	88.9467	12.2223	-2.86342	4.28456e-46	1.21097e-44	yes	Ccne1	290.667	65.3333	17.461	4.07267	-2.10009	3.33813e-24	9.41529e-23	yes
Calb2	3317.67	96	308.587	7.53833	-5.35529	7.56209e-95	2.13046e-93	yes	Dmtn	2894.67	513	152.262	24.039	-2.66311	4.45677e-46	1.25768e-44	yes	Dpep2	485	83	32.5797	5.866	-2.47352	3.36966e-24	9.48946e-23	yes
Amer2	1063.33	106	14.506	1.50867	-3.2653	1.28165e-94	3.60516e-93	yes	Dnase1l1	46.6667	619.333	5.65333	46.0527	3.02611	4.70937e-46	1.3269e-44	yes	Paqr4	479.333	1373.33	21.143	62.4533	1.5626	3.80539e-24	1.06999e-22	yes
Atl1	1654	194.333	55.3793	5.38333	-3.36278	1.48347e-94	4.16637e-93	yes	Klhl6	60.3333	606.667	3.341	29.7933	3.15664	5.45395e-46	1.5343e-44	yes	Ranbp1	2104.67	960	221.926	103.739	-1.09712	3.87588e-24	1.08813e-22	yes
Rrbp1	1515	6700.67	39.6217	153.926	1.95788	1.64377e-94	4.60944e-93	yes	Carmil2	843	116	26.8627	3.261	-3.04222	6.25637e-46	1.75731e-44	yes	Sv2a	833.333	1987	21.9583	53.6787	1.28958	4.34642e-24	1.21834e-22	yes
Cenpa	17	670.333	2.08267	64.5927	4.95487	1.7552e-94	4.91428e-93	yes	Psd	703.333	125.667	39.2457	6.605	-2.5709	6.3679e-46	1.78587e-44	yes	Kcna1	305.333	864	8.76467	25.1757	1.52226	4.86891e-24	1.36269e-22	yes
Tbc1d30	950.333	79.3333	23.5677	2.20033	-3.42101	2.09416e-94	5.85426e-93	yes	Cd44	411	3911.67	14.3743	121.733	3.08216	7.05835e-46	1.97645e-44	yes	Tom1l2	1031.67	2774	25.8287	74.188	1.52221	5.07772e-24	1.41895e-22	yes
Dgkb	761.333	28.6667	19.4163	0.683333	-4.82854	2.32256e-94	6.48273e-93	yes	B4galt1	144	1557.33	4.90767	45.617	3.21646	7.86396e-46	2.19863e-44	yes	Vcan	4424	1883.67	58.4383	27.0593	-1.11079	5.30874e-24	1.48122e-22	yes
Pfn2	8034.67	1400	520.66	78.9977	-2.72046	2.36594e-94	6.59364e-93	yes	Rasal3	49	566.333	1.88667	18.9223	3.32618	9.20093e-46	2.56846e-44	yes	Camta1	193.333	662	5.644	15.6197	1.46857	5.40418e-24	1.50553e-22	yes
Mmp12	7.33333	1240.33	0.67	95.572	7.15628	2.43652e-94	6.77991e-93	yes	Kcnj3	970.333	134.333	32.9303	4.103	-3.00467	9.48746e-46	2.64438e-44	yes	Plin4	15	162	0.276667	2.98633	3.43215	5.5524e-24	1.54445e-22	yes
Plk1	16	777	1.04167	40.3067	5.27405	2.5473e-94	7.07726e-93	yes	Tmsb4x	9495.67	31123.3	1658.95	4751.79	1.5182	1.14952e-45	3.19907e-44	yes	Lrp3	271	789.333	7.75133	22.9197	1.56407	5.98856e-24	1.66322e-22	yes
Arfgef3	1689	204	15.6093	1.594	-3.29169	2.56117e-94	7.10488e-93	yes	Lmo3	521	67.3333	28.7133	3.56167	-3.0111	1.25524e-45	3.48791e-44	yes	Stmn3	296	1187.33	29.9013	123.418	2.04527	6.19414e-24	1.71769e-22	yes
Nell1	796.333	9.66667	33.8047	0.37	-6.51355	2.72343e-94	7.54345e-93	yes	Sez6l	1611.67	424	36.7643	8.42967	-2.12476	1.31653e-45	3.65262e-44	yes	Mms22l	285.667	59.6667	10.2333	1.98967	-2.36268	6.22188e-24	1.72275e-22	yes
Gria2	1533.67	108	33.4973	2.11533	-3.98509	4.09564e-94	1.13269e-92	yes	Dennd5b	1294	323	18.12	4.22167	-2.1017	1.35688e-45	3.75882e-44	yes	Ncam1	1586.67	3881.33	55.142	137.244	1.31552	6.5253e-24	1.80401e-22	yes
Cd300lb	10.6667	952.333	0.536333	38.7097	6.17342	4.91823e-94	1.35811e-92	yes	Baalc	2732.33	536.333	142.782	24.618	-2.53603	1.40259e-45	3.8795e-44	yes	Igdcc4	334.333	961.333	6.123	18.0487	1.55958	6.69318e-24	1.8476e-22	yes
Fut9	1072.67	104.333	11.9733	0.983667	-3.60551	5.40291e-94	1.48967e-92	yes	Dock8	145.333	1106	2.52667	16.494	2.70663	2.04639e-45	5.65158e-44	yes	Fndc5	64	375.667	2.63867	15.869	2.58833	6.71041e-24	1.84954e-22	yes
Pak3	1956.33	299	43.5387	4.74633	-3.19741	1.48024e-93	4.07504e-92	yes	Grin2b	523	51	2.95833	0.248333	-3.57443	2.14099e-45	5.90387e-44	yes	Wee1	593.333	172.667	19.8347	5.92467	-1.74322	7.147e-24	1.96689e-22	yes
Itih3	2888.33	404	177.252	17.7043	-3.32363	2.13585e-93	5.87099e-92	yes	Prrt3	524	58.6667	20.6423	2.04433	-3.3359	2.15675e-45	5.93827e-44	yes	Fa2h	868.333	2029.33	39.9573	95.4067	1.25563	7.93523e-24	2.1805e-22	yes
Lpxn	25	855.667	2.03367	58.076	4.83579	2.41096e-93	6.61715e-92	yes	Bcat1	3244.33	881.667	180.559	45.3313	-1.99389	2.55642e-45	7.02802e-44	yes	Mast1	46.3333	325.667	1.093	7.95767	2.86405	8.01025e-24	2.19779e-22	yes
Ect2	28.3333	652	1.29667	18.935	3.86818	3.05235e-93	8.36482e-92	yes	Epha10	492.667	62.3333	15.2477	1.608	-3.24525	2.97259e-45	8.15975e-44	yes	Ddo	41	219	1.877	10.4037	2.47059	9.48176e-24	2.5976e-22	yes
Tmem150c	1041.67	64	49.4947	2.65067	-4.22285	3.76277e-93	1.02961e-91	yes	Tpp1	1307	4437	50.4593	149.181	1.56387	3.15684e-45	8.65242e-44	yes	Dpp6	218.333	893.667	5.545	23.8383	2.10402	1.07626e-23	2.94405e-22	yes
Vamp2	5143	997	315.619	53.839	-2.55146	6.81949e-93	1.8632e-91	yes	Hpca	1006	158.667	105.825	13.025	-3.02233	3.91019e-45	1.0701e-43	yes	Myh14	346	889.667	6.72367	17.2517	1.35942	1.10628e-23	3.02162e-22	yes
Arhgap45	123	1109.67	4.205	32.2497	2.93911	7.31576e-93	1.99578e-91	yes	Col7a1	12	392	0.177667	4.927	4.79346	3.95042e-45	1.07948e-43	yes	H2az1	5328.33	2249.67	568.967	247.052	-1.20353	1.1825e-23	3.22493e-22	yes
Gng3	1664.67	200.333	135.806	13.9083	-3.28753	9.28493e-93	2.52917e-91	yes	Lcp2	71	645.667	3.111	23.328	2.90661	5.04076e-45	1.37535e-43	yes	Rph3a	309.667	1141	8.50733	32.5727	1.93688	1.2575e-23	3.42432e-22	yes
Ch25h	16	841.333	1.584	69.7627	5.46081	9.3392e-93	2.54012e-91	yes	Chn1	3058.33	581.333	158.108	28.279	-2.48311	5.6346e-45	1.53507e-43	yes	Crebrf	389.667	976.667	6.46533	16.2787	1.33219	1.37618e-23	3.74188e-22	yes
B4galt1	144	3196.67	4.90767	91.5977	4.2222	9.65042e-93	2.62083e-91	yes	Slc7a8	196.667	1279.33	6.50333	36.617	2.49326	5.79359e-45	1.57601e-43	yes	Cyp2j9	210	601.333	11.8383	34.6443	1.54915	1.47126e-23	3.99442e-22	yes
Slc4a3	1421.33	194	44.87	5.28533	-3.08568	1.27167e-92	3.44837e-91	yes	Zdhhc22	554.667	81.6667	21.5937	2.85567	-2.91871	6.06202e-45	1.64656e-43	yes	Asic2	57.3333	341	2.165	12.8153	2.56543	1.48994e-23	4.03911e-22	yes
Ptpn1	459	2663.33	14.6707	72.0693	2.29645	1.53147e-92	4.14666e-91	yes	Ttbk1	2349.67	529.333	40.39	8.13633	-2.31155	6.82963e-45	1.85228e-43	yes	Mastl	312.333	64.6667	6.372	1.359	-2.2292	1.57963e-23	4.27586e-22	yes
Sla	77	1048.33	4.00933	43.568	3.44183	1.54581e-92	4.17922e-91	yes	Fgf9	447.333	38.3333	26.404	1.72567	-3.93553	7.18159e-45	1.94483e-43	yes	Abhd3	174.333	554.333	10.217	33.2123	1.70075	1.67401e-23	4.52456e-22	yes
Galnt9	930.333	71.6667	46.3927	3.762	-3.62433	1.67587e-92	4.52409e-91	yes	Necap1	3099.33	857.333	167.999	40.722	-2.04457	7.27022e-45	1.96589e-43	yes	Gprasp1	645.333	1533	13.4613	34.8443	1.3721	1.89946e-23	5.12629e-22	yes
Tro	2290.67	359.667	65.5377	7.92167	-3.04845	2.21986e-92	5.98369e-91	yes	Cyfip2	10190	2711	241.523	51.9473	-2.21704	7.60941e-45	2.05454e-43	yes	Ncdn	981	2499.33	31.136	80.9583	1.3786	2.17304e-23	5.85591e-22	yes
Cdca3	23.6667	661	1.784	48.2173	4.75636	2.98355e-92	8.03029e-91	yes	Acss2	1950.33	501.333	91.162	20.549	-2.14936	8.03256e-45	2.16556e-43	yes	Arhgef9	286	757.333	7.73867	19.8063	1.3558	2.48047e-23	6.66455e-22	yes
Otulinl	108	1219	7.19233	86.974	3.59605	3.16623e-92	8.50931e-91	yes	D430041D05Rik	1297	272.333	15.8423	2.91233	-2.44354	8.56647e-45	2.30607e-43	yes	Sez6l	106	424	2.09433	8.42967	2.00898	2.56181e-23	6.87292e-22	yes
Epb41l1	9572.33	1540.67	176.894	33.1307	-2.41665	3.32345e-92	8.91859e-91	yes	Cmklr1	63.3333	933.333	3.48567	40.994	3.55591	9.17596e-45	2.46648e-43	yes	Cdc25c	144.333	13.3333	8.39367	0.808667	-3.37568	2.66398e-23	7.1273e-22	yes
Casp8	67.6667	1164.33	4.56233	67.554	3.8882	3.54301e-92	9.4937e-91	yes	Slc30a3	497.667	67.6667	32.742	3.79667	-3.10834	9.31012e-45	2.49884e-43	yes	Camk2b	153.333	548.667	4.877	18.9103	1.95511	2.66449e-23	7.1273e-22	yes
Ehbp1l1	184.333	1477.33	7.491	48.4657	2.69373	3.58004e-92	9.57872e-91	yes	Rap1gap	2845.67	680.333	124.837	30.4503	-2.03552	1.03649e-44	2.77782e-43	yes	Il11	146.333	7	9.06833	0.592333	-3.93636	2.679e-23	7.15557e-22	yes
Creg2	920.333	86.6667	20.3107	1.62833	-3.64077	3.77458e-92	1.00843e-90	yes	Dlgap3	918	153.333	33.0413	4.84633	-2.76931	1.15275e-44	3.08484e-43	yes	Dnajc6	239	742.667	6.31967	17.3993	1.46111	2.88838e-23	7.69932e-22	yes
Sh3bp2	92	1065.67	4.263	41.9873	3.30001	3.8627e-92	1.03045e-90	yes	Rab3il1	320.667	2061	16.2753	96.0457	2.56103	1.32997e-44	3.55385e-43	yes	Cdc45	355	79	19.4227	4.38	-2.14874	2.89107e-23	7.69932e-22	yes
Bnip2	372	2421.33	24.6227	141.753	2.52532	4.20454e-92	1.11999e-90	yes	Krt222	762.333	93.3333	37.924	4.16967	-3.18511	1.61418e-44	4.30695e-43	yes	Sbno2	2698	1177	74.6117	32.941	-1.17952	3.05821e-23	8.1325e-22	yes
Clec5a	29	773	1.61267	40.502	4.65047	4.59139e-92	1.22124e-90	yes	Lamb1	304.333	3023.67	7.10367	61.323	3.10979	1.64293e-44	4.3772e-43	yes	Cpne6	24.6667	319.667	1.51833	18.6007	3.61479	3.09634e-23	8.22186e-22	yes
Ccn1	77	2461.33	5.135	137.575	4.74371	5.44746e-92	1.44682e-90	yes	Gpx7	57.6667	575.667	6.38933	53.2927	3.0602	1.9557e-44	5.20286e-43	yes	Kifc2	50.6667	258.333	1.79733	9.52067	2.4052	3.19986e-23	8.48431e-22	yes
Chrna4	882.667	30	26.1917	0.739	-5.14739	7.00545e-92	1.85788e-90	yes	Aspg	71.3333	514.333	3.794	23.625	2.63852	2.19283e-44	5.82138e-43	yes	Daam2	387.667	985.333	12.291	31.5977	1.36222	3.21843e-23	8.52109e-22	yes
Ndrg3	7090	1208.33	365.358	53.219	-2.7793	9.07502e-92	2.40322e-90	yes	Il6ra	99	795.333	2.45133	16.1273	2.71787	2.19463e-44	5.82138e-43	yes	Cdc6	308	62	11.3423	2.39433	-2.24402	3.35321e-23	8.86499e-22	yes
Cbarp	2166.33	142	102.224	5.568	-4.19843	9.48303e-92	2.5076e-90	yes	Emp1	293.333	2468.67	14.5883	105.827	2.85882	2.4367e-44	6.45404e-43	yes	Tmem252	914	377	20.788	8.775	-1.24428	3.67549e-23	9.70287e-22	yes
Knstrn	25.6667	797.333	2.02067	58.1867	4.84779	1.15591e-91	3.05211e-90	yes	Gpr157	75.3333	785.667	2.07833	18.669	3.16715	2.47193e-44	6.53781e-43	yes	Fancd2	201.667	34.6667	4.215	0.761667	-2.4683	3.76914e-23	9.9212e-22	yes
Stt3a	844.667	4687.33	23.7237	100.657	2.08505	2.05004e-91	5.40512e-90	yes	Pbxip1	1407.33	5083	52.53	156.957	1.57916	2.62818e-44	6.94093e-43	yes	Slco2a1	819.333	186.667	13.1673	3.04867	-2.11071	3.92586e-23	1.03188e-21	yes
Hpca	1006	39.6667	105.825	3.463	-4.93351	3.1351e-91	8.25395e-90	yes	Ifitm3	402.667	3082	80.2743	528.249	2.71821	2.72949e-44	7.19798e-43	yes	Piezo1	3610	1231	53.042	19.0003	-1.48111	3.97932e-23	1.04441e-21	yes
Trem2	182.667	3450	22.5927	361.645	4.00065	4.46042e-91	1.17261e-89	yes	Tlr1	34.3333	407.333	1.61867	16.72	3.3687	2.84813e-44	7.49993e-43	yes	Coq8a	47	271	2.69133	13.107	2.28394	4.13438e-23	1.08354e-21	yes
Fa2h	4306	868.333	232.757	39.9573	-2.54229	5.93038e-91	1.55679e-89	yes	Nkrf	1036	195	42.2723	6.90067	-2.61491	3.00865e-44	7.91114e-43	yes	Ric1	1524.67	643.667	31.584	14.4517	-1.12796	4.95576e-23	1.29694e-21	yes
Ldhb	11185.3	1434.33	1160.99	127.894	-3.18233	6.14682e-91	1.61127e-89	yes	Themis2	36	617.667	1.57767	23.242	3.88087	3.26472e-44	8.57201e-43	yes	Mif	2126.33	984.667	446.434	212.168	-1.07324	5.49332e-23	1.43555e-21	yes
Dhcr24	4969.67	726.667	166.276	20.7343	-3.00349	9.5745e-91	2.50614e-89	yes	Lgmn	4431	17628	301.679	1045.06	1.79249	4.41451e-44	1.15742e-42	yes	Ccn4	644.667	229.667	14.64	5.321	-1.46015	5.91106e-23	1.54034e-21	yes
Clvs1	749.333	38	27.983	1.19667	-4.54746	9.79935e-91	2.56129e-89	yes	Frrs1l	1840.67	235	38.1673	4.05367	-3.23504	4.4896e-44	1.17541e-42	yes	Rnf157	398.333	1074.33	11.2007	32.2593	1.52613	5.91133e-23	1.54034e-21	yes
Mfsd6	2299.33	436	69.2887	10.4557	-2.72833	1.06123e-90	2.76975e-89	yes	Slc5a7	1308	269.333	33.986	6.096	-2.47901	4.81944e-44	1.25994e-42	yes	Ptgs2	984.333	252	25.074	6.65067	-1.91462	6.83957e-23	1.77966e-21	yes
Lima1	391.667	3002.67	12.9693	83.6943	2.69003	1.08992e-90	2.84055e-89	yes	Zfp36l1	431	2143	19.4087	83.7417	2.10924	4.96901e-44	1.29576e-42	yes	Gabrg1	60.6667	344.667	1.57433	9.61333	2.6103	7.03133e-23	1.82694e-21	yes
Edil3	4544.33	1010.67	116.613	22.0517	-2.40277	1.39276e-90	3.62458e-89	yes	Bsn	2397	476	26.6417	5.40833	-2.30043	4.97076e-44	1.29576e-42	yes	Nos1	75	329	1.06467	3.851	1.85483	8.35026e-23	2.16653e-21	yes
Camk2a	1945	186.333	58.1413	4.72567	-3.62097	1.48538e-90	3.86008e-89	yes	Frrs1	40.6667	466.333	1.31333	13.8313	3.39664	5.04201e-44	1.31244e-42	yes	Crlf1	737.333	200.667	66.567	18.066	-1.88153	1.01445e-22	2.62831e-21	yes
Fcer1g	67.3333	1783.33	13.507	300.801	4.47703	1.52802e-90	3.96517e-89	yes	Slc6a15	1070.33	188	47.423	7.40433	-2.67915	5.53927e-44	1.43981e-42	yes	Cav1	4849.33	2253	228.02	107.441	-1.08561	1.38905e-22	3.59369e-21	yes
Nkiras1	1618.33	204	106.838	13.679	-2.96539	1.57155e-90	4.0723e-89	yes	Osbpl6	1386.67	247.333	24.2193	4.20567	-2.52575	5.71651e-44	1.48375e-42	yes	Pi4k2b	488	157.667	18.2513	6.526	-1.48373	1.50027e-22	3.87592e-21	yes
Rap1gap2	2217.67	422	52.397	8.76067	-2.58037	1.96136e-90	5.07512e-89	yes	Foxd1	45.6667	702.667	1.22733	16.2033	3.72269	6.02863e-44	1.56253e-42	yes	Slc5a7	27	269.333	0.608667	6.096	3.32414	1.61112e-22	4.15047e-21	yes
Hmmr	18.6667	684	0.656667	20.1017	4.93601	2.11233e-90	5.45796e-89	yes	Cbln4	326	22.6667	15.149	0.919	-4.04301	6.6886e-44	1.73111e-42	yes	Gpc3	800	2231.33	41.981	119.635	1.51083	1.69488e-22	4.36006e-21	yes
Fcgr1	27.6667	685.333	1.66767	35.926	4.42913	2.47436e-90	6.38428e-89	yes	Tunar	428	45.6667	17.8597	1.63667	-3.44787	7.84893e-44	2.02852e-42	yes	Ap3b2	197.667	610	5.97967	18.8327	1.6551	1.74072e-22	4.47162e-21	yes
Pclaf	8.33333	892	0.515333	46.8023	6.50493	4.74789e-90	1.22329e-88	yes	Steap3	134.333	1632.67	6.86467	67.198	3.29116	9.07984e-44	2.3433e-42	yes	Ptpn12	1415.67	640	54.7117	25.1923	-1.11886	1.80748e-22	4.63655e-21	yes
Lypd1	714.333	26.6667	44.274	1.69167	-4.70994	4.80148e-90	1.23534e-88	yes	Kcnk6	49.6667	435.333	1.642	12.49	2.92725	9.13348e-44	2.35379e-42	yes	Enho	134	488.333	12.023	45.1107	1.90767	1.82659e-22	4.67895e-21	yes
Pde4a	1152.33	145.667	43.5343	3.98767	-3.44854	5.18818e-90	1.33293e-88	yes	Arap1	531.333	3125.33	18.1557	100.832	2.47346	1.01631e-43	2.61542e-42	yes	Vsnl1	128.667	583	7.64667	36.425	2.25203	2.05836e-22	5.26522e-21	yes
C5ar1	20.6667	986	1.62667	76.2583	5.5509	6.23217e-90	1.59888e-88	yes	Pld3	3084.67	12047.7	190.217	636.165	1.74176	1.05998e-43	2.72393e-42	yes	Kifc1	315	65	15.422	3.21	-2.26434	2.08782e-22	5.33307e-21	yes
Tmem25	791	30.6667	48.2903	2.86633	-4.07446	8.0073e-90	2.05139e-88	yes	Fmnl3	278	1397.67	8.58133	37.8447	2.14082	1.12938e-43	2.89816e-42	yes	Lrp11	313	887	11.4717	35.2247	1.61851	2.25882e-22	5.76173e-21	yes
Cd63	1595.33	13401.7	201.977	1433.59	2.82737	8.02024e-90	2.0518e-88	yes	P2ry13	217	1084.33	11.6013	50.2297	2.11425	1.25424e-43	3.21402e-42	yes	Itgax	1465.33	4372.33	41.2543	127.379	1.62651	2.27651e-22	5.79871e-21	yes
Wfdc17	8.66667	1088.33	2.18767	231.05	6.72267	8.75551e-90	2.23674e-88	yes	Doc2a	356	24.3333	22.8387	1.38	-4.04874	1.27531e-43	3.26339e-42	yes	Kcnk9	35.6667	321.667	0.337333	3.073	3.1874	2.5587e-22	6.50836e-21	yes
Itgb1	2096.67	17262.3	74.2627	519.469	2.80633	9.64013e-90	2.45925e-88	yes	Sulf1	281.667	1723	8.12233	45.244	2.47776	1.3571e-43	3.46779e-42	yes	Tst	406.333	1091	40.3563	111.779	1.46978	2.91014e-22	7.39192e-21	yes
Hnrnpf	1603	7641.67	113.944	455.573	1.99936	1.65758e-89	4.22262e-88	yes	Col4a5	241	2523	5.80533	55.615	3.26002	1.37189e-43	3.50064e-42	yes	Phyhipl	1247.67	2587	66.037	139.105	1.07482	3.05917e-22	7.75959e-21	yes
Ccr5	118.333	1280.67	4.70033	33.265	2.82317	1.89027e-89	4.80862e-88	yes	Stxbp2	96.6667	769.333	7.308	46.2007	2.66037	1.51744e-43	3.8666e-42	yes	Chd5	74.3333	346	0.909	4.37967	2.26847	3.11588e-22	7.89239e-21	yes
Gngt2	25.6667	906.333	5.91467	159.484	4.75297	1.93985e-89	4.92781e-88	yes	Asic1	1229.33	230.333	44.1423	7.18333	-2.61944	1.56572e-43	3.98402e-42	yes	Nsd2	1885.33	883.333	37.6953	16.4737	-1.19422	3.8191e-22	9.66014e-21	yes
Arl11	10.3333	838	0.895	64.1677	6.16382	2.27175e-89	5.76285e-88	yes	Parp14	113.333	953.667	2.05533	14.977	2.8653	1.60728e-43	4.08402e-42	yes	Kif1a	3767	7671.67	58.1563	118.81	1.03064	3.88141e-22	9.80408e-21	yes
Tnk2	4932.33	716.333	154.299	21.1447	-2.86736	4.22268e-89	1.06969e-87	yes	Pde1b	2521	630	107.354	23.2487	-2.20716	1.73618e-43	4.40537e-42	yes	Bdh2	38	202	3.761	20.6483	2.45684	4.24113e-22	1.06978e-20	yes
Lmtk3	803.667	67.6667	27.9887	1.902	-3.87925	4.37491e-89	1.1067e-87	yes	Cdh8	507.333	52.3333	18.9073	1.669	-3.50189	1.80943e-43	4.58482e-42	yes	Slc7a10	12.3333	144.667	1.01133	9.475	3.22787	4.67727e-22	1.17815e-20	yes
Unc13a	1677.33	139.333	31.692	1.76333	-4.16774	5.57849e-89	1.40919e-87	yes	Mfsd6	2299.33	522.333	69.2887	13.3473	-2.37607	2.09113e-43	5.2912e-42	yes	Ngf	203.333	35.3333	23.0147	4.25267	-2.43611	5.06231e-22	1.27337e-20	yes
Gabrb1	1166.67	66.3333	14.297	1.06033	-3.75312	5.88265e-89	1.48395e-87	yes	Lrrc49	3018.67	650	141.353	26.309	-2.42567	2.17845e-43	5.50445e-42	yes	Zkscan2	86.3333	338.333	1.558	6.404	2.03928	5.16055e-22	1.29628e-20	yes
Iqgap2	62.6667	877	1.44833	17.0953	3.56114	6.46688e-89	1.62906e-87	yes	Nkiras1	1618.33	365.667	106.838	24.012	-2.1536	2.26147e-43	5.70627e-42	yes	Il34	215.667	699	14.4013	47.722	1.72845	5.29426e-22	1.32803e-20	yes
6430548M08Rik	4505.33	905	110.856	20.018	-2.46932	6.88016e-89	1.73076e-87	yes	Npc2	2926.67	12623.3	119.008	445.971	1.90589	3.02389e-43	7.61874e-42	yes	Sox9	224	752.667	6.14033	21.347	1.79764	5.44862e-22	1.36486e-20	yes
Cebpd	58	1014	2.099	31.002	3.88459	7.84261e-89	1.97013e-87	yes	Mcf2	418.333	41	15.2473	1.29167	-3.56125	3.02781e-43	7.61874e-42	yes	Pttg1	369.667	79.6667	57.3213	12.7593	-2.16752	5.85527e-22	1.4647e-20	yes
Mfsd1	673	3891.67	30.0033	147.383	2.29638	8.28865e-89	2.07929e-87	yes	Lyl1	25	344.333	2.55833	28.9753	3.50155	3.33152e-43	8.37012e-42	yes	Cx3cl1	516	1418.33	18.023	50.883	1.49734	6.87083e-22	1.71638e-20	yes
Frrs1	40.6667	774.333	1.31333	24.809	4.23956	1.20072e-88	3.00794e-87	yes	Clec4n	9	358	1.02	34.698	5.08821	3.33567e-43	8.37012e-42	yes	Dync1i1	81.3333	389	3.59867	17.6137	2.29116	6.93316e-22	1.72957e-20	yes
Hcn1	960	105	9.14733	0.851	-3.42612	1.46915e-88	3.67531e-87	yes	Cdh5	400.333	2715.67	13.5437	80.2543	2.56696	4.10872e-43	1.02957e-41	yes	Adamts1	2986.67	1283.67	76.153	32.9603	-1.20817	7.443e-22	1.85166e-20	yes
Aprt	145	1394	23.084	188.166	3.02704	1.68297e-88	4.20439e-87	yes	Dpp6	5065.67	893.667	153.573	23.8383	-2.68757	4.47669e-43	1.12022e-41	yes	Slc7a2	1468.33	3315.67	27.733	55.9777	1.01325	7.50027e-22	1.86335e-20	yes
Ncaph	23	606.333	1.248	25.9477	4.37791	2.21114e-88	5.51626e-87	yes	Omg	2607.67	696.333	156.855	36.6753	-2.09655	4.49683e-43	1.12371e-41	yes	Foxj1	106.667	586.333	4.55833	26.2393	2.52515	7.5392e-22	1.87046e-20	yes
Pira2	15.6667	954	0.620667	31.4263	5.66201	2.53347e-88	6.3117e-87	yes	P2rx7	242.667	1212	7.993	33.125	2.05111	4.55932e-43	1.13776e-41	yes	Acsl4	1762.33	687	40.134	16.0897	-1.31869	8.82697e-22	2.18697e-20	yes
Atp6v0e	332.667	2109.33	53.6267	292.12	2.44554	2.77074e-88	6.89332e-87	yes	Pira2	15.6667	460	0.620667	15.5513	4.64708	5.56656e-43	1.3872e-41	yes	Npr2	396	1057	15.771	45.0157	1.51315	8.86232e-22	2.19273e-20	yes
Fstl5	670.333	17	19.1853	0.419	-5.51691	3.03922e-88	7.55086e-87	yes	Cnr2	17	295.333	0.598333	8.93967	3.9012	5.75432e-43	1.43202e-41	yes	Mapk10	221	604.333	6.14767	16.2237	1.39999	9.29125e-22	2.29572e-20	yes
Ttbk2	3393.33	611	42.0553	8.731	-2.26807	3.04851e-88	7.56356e-87	yes	Rnf208	1193	268.667	120.187	23.6857	-2.3432	5.79148e-43	1.43929e-41	yes	Ece2	154	527.333	5.704	19.7577	1.79237	9.54615e-22	2.3555e-20	yes
Itgb5	1363.67	6445.33	62.4733	249.886	1.99996	3.54471e-88	8.78262e-87	yes	Cxcl12	1280	7009.67	47.4967	391.106	3.04166	5.85769e-43	1.45375e-41	yes	Rnf167	314.333	802.667	19.614	51.3377	1.38813	9.81061e-22	2.41746e-20	yes
Rin3	69.3333	1073.33	2.48	33.1633	3.74118	4.43846e-88	1.0982e-86	yes	Nrp1	344	2386	12.987	77.4177	2.57559	6.25086e-43	1.5492e-41	yes	Olr1	263	43.3333	8.38633	1.68767	-2.31301	1.00775e-21	2.47986e-20	yes
Tspan7	8910	1740.67	688.92	114.091	-2.59416	8.35283e-88	2.0639e-86	yes	Fkbp10	139.333	1421.67	7.251	64.2243	3.14687	7.94515e-43	1.96643e-41	yes	Paqr7	474.667	1147.67	27.129	65.9813	1.28222	1.09706e-21	2.69597e-20	yes
Gpr137b	936.333	5061	42.4947	200.09	2.2353	8.4182e-88	2.07722e-86	yes	Cacna1e	945.667	154.667	11.3383	1.28467	-3.14174	8.2043e-43	2.0266e-41	yes	Frmpd4	18.6667	181.667	0.287	2.64167	3.20233	1.17516e-21	2.884e-20	yes
Pcna	727.333	3782.33	64.2883	284.632	2.14647	1.30066e-87	3.20504e-86	yes	Srgap3	4224.67	1367.67	66.5987	18.566	-1.84283	8.21066e-43	2.0266e-41	yes	Gen1	158.333	21	4.851	0.768333	-2.65848	1.19085e-21	2.91854e-20	yes
Dap	194.333	1922.67	16.923	141.182	3.0605	1.48295e-87	3.64927e-86	yes	Pxn	400.667	2214	14.9473	71.359	2.25521	8.4685e-43	2.0874e-41	yes	Pola1	462.667	151	9.901	3.31833	-1.57712	1.21407e-21	2.97144e-20	yes
Itpripl2	235.667	2414.67	4.63233	40.3053	3.12116	1.53335e-87	3.76817e-86	yes	Ifitm2	265.333	2107.33	54.8903	376.27	2.77714	8.51301e-43	2.09552e-41	yes	Sh3gl2	93.6667	404.667	3.79267	16.918	2.15727	1.26898e-21	3.10164e-20	yes
Naglu	146	1897.33	7.66933	84.4097	3.46024	1.73834e-87	4.26613e-86	yes	Dap	194.333	1195.67	16.923	90.0053	2.41103	8.95779e-43	2.20201e-41	yes	Clstn1	2211.33	5563	59.2277	152.218	1.3618	1.32587e-21	3.23634e-20	yes
Got1	5693	923.333	373.095	51.3213	-2.86191	2.43868e-87	5.97675e-86	yes	Zcchc12	1383.33	266.333	87.7457	14.767	-2.57095	9.64328e-43	2.36731e-41	yes	Arhgap36	29.3333	197	1.13967	7.60167	2.7377	1.39224e-21	3.38923e-20	yes
Smim45	1359	94.3333	117.709	6.94633	-4.08283	3.99483e-87	9.77734e-86	yes	Glmp	770	3045	84.502	307.126	1.86177	1.1194e-42	2.74428e-41	yes	Tmem132e	84.3333	368	2.344	10.363	2.1444	1.39225e-21	3.38923e-20	yes
Slfn9	21	687.667	0.547333	15.1607	4.79177	4.66164e-87	1.13939e-85	yes	Peli3	680.333	106	22.994	3.065	-2.9073	1.13956e-42	2.78993e-41	yes	Scrt1	41	246.667	1.059	6.62167	2.64449	1.4119e-21	3.43247e-20	yes
Asah2	1749.67	310.333	46.294	7.18933	-2.6869	4.67936e-87	1.14218e-85	yes	Grip2	545.333	82.6667	14.4853	1.85267	-2.96692	1.19545e-42	2.92281e-41	yes	Mcm7	1150.33	445	60.7797	25.2097	-1.26961	1.59338e-21	3.86848e-20	yes
Kcnip1	723.667	55	57.758	3.71133	-3.96001	5.98557e-87	1.45904e-85	yes	Tspoap1	836	161	22.804	3.59167	-2.66656	1.33747e-42	3.26561e-41	yes	Rcan2	574.667	1421.67	23.1893	54.5453	1.23399	1.88464e-21	4.5695e-20	yes
Sez6l2	9349	752.333	372.776	25.977	-3.843	1.45059e-86	3.5312e-85	yes	Tlr8	5.66667	385.667	0.341	16.45	5.59217	1.35251e-42	3.2979e-41	yes	Actn1	3638.67	1371.33	126.169	47.3507	-1.4139	1.95233e-21	4.72521e-20	yes
Nalcn	1605.33	236.333	30.3887	3.80733	-2.99668	2.31687e-86	5.63242e-85	yes	Caskin1	2257.33	361.333	51.8467	7.28133	-2.83198	1.45186e-42	3.53539e-41	yes	Il33	3232	1188.33	145.298	55.7277	-1.38255	1.95407e-21	4.72521e-20	yes
Rims2	881	69.3333	31.5553	1.877	-4.07138	3.32739e-86	8.07818e-85	yes	Btg1	448	2060	13.0647	58.131	2.15364	1.71129e-42	4.16154e-41	yes	Car14	340.333	977.667	23.177	69.1577	1.5772	2.36948e-21	5.72209e-20	yes
Glipr2	236.667	1723	14.0103	91.05	2.70017	4.34881e-86	1.05438e-84	yes	Dok1	34.3333	380.333	2.54833	25.4827	3.32189	1.92092e-42	4.65977e-41	yes	Il4i1	6.66667	137.333	0.352667	8.03767	4.5104	2.41671e-21	5.82839e-20	yes
Stmn2	5624	817.333	363.134	45.0613	-3.01054	5.10393e-86	1.23581e-84	yes	Abcg1	968	4907.67	23.1017	118.398	2.35758	1.92132e-42	4.65977e-41	yes	Map1lc3a	330.333	880	34.058	93.0253	1.44963	2.45763e-21	5.91919e-20	yes
Slc1a1	1416.33	192.667	50.176	5.80967	-3.11047	5.92112e-86	1.43175e-84	yes	Cbln1	526	70.6667	37.4583	4.57167	-3.03449	2.233e-42	5.40846e-41	yes	Cyp27a1	161	488	9.70233	30.1687	1.63665	2.54755e-21	6.12764e-20	yes
Il1r1	91	1003.33	2.54633	23.5667	3.21025	8.78742e-86	2.122e-84	yes	Esrrg	906.667	124.667	23.7543	2.85767	-3.05528	2.26837e-42	5.48679e-41	yes	Sfrp1	219.333	711.667	5.77833	19.0747	1.72293	2.66062e-21	6.39112e-20	yes
Grm1	650.667	12	13.0777	0.204667	-5.99769	8.90037e-86	2.14641e-84	yes	Adcy1	3039	974.333	33.3747	9.323	-1.83989	2.52201e-42	6.09216e-41	yes	Nr1d1	351.333	1283	14.636	55.1267	1.91323	2.72663e-21	6.54102e-20	yes
Camkv	965.667	37.6667	39.8133	1.30233	-4.93408	9.50735e-86	2.28974e-84	yes	Susd4	1642.67	368	78.8693	15.463	-2.35064	2.54872e-42	6.14849e-41	yes	Sgo2a	285.333	55.6667	6.56333	1.32667	-2.30662	2.92599e-21	7.01001e-20	yes
Eif4ebp1	28	635.667	1.887	36.269	4.26457	1.05099e-85	2.52783e-84	yes	Slfn2	61	825	4.93767	57.4973	3.54159	2.66775e-42	6.42679e-41	yes	Ska1	133.667	13.6667	6.28833	0.764667	-3.03977	3.06454e-21	7.33226e-20	yes
Thbs2	701	9053	15.9963	175.641	3.45681	1.1402e-85	2.73875e-84	yes	Pdgfrl	69.6667	853	6.11533	64.162	3.39122	2.67118e-42	6.42679e-41	yes	Tnfrsf26	321	64.3333	11.803	2.45067	-2.26791	3.83785e-21	9.17038e-20	yes
Plekha6	2780	445.667	59.589	8.74367	-2.76874	1.57221e-85	3.77144e-84	yes	Arpc5	1030.67	3552.67	72.34	217.374	1.58732	2.80044e-42	6.72885e-41	yes	Nkain4	75.6667	291	9.803	36.7637	1.90699	3.85754e-21	9.20531e-20	yes
Rundc3a	2734.33	423.667	186.963	23.928	-2.96598	1.62947e-85	3.90361e-84	yes	AI854703	591	77	22.1577	2.47	-3.16522	2.9111e-42	6.98548e-41	yes	Wwc1	139	606	3.45433	15.7063	2.18487	3.93058e-21	9.36211e-20	yes
Pbk	14.6667	635.333	1.37867	42.1337	4.93363	1.66166e-85	3.97545e-84	yes	Sms	2288.67	544.667	83.0207	20.4273	-2.02297	2.93243e-42	7.02736e-41	yes	Cdc25b	660.333	255.667	24.856	9.87533	-1.33169	3.93357e-21	9.36211e-20	yes
Chic1	1001	130.333	18.2797	2.015	-3.18139	3.84796e-85	9.19393e-84	yes	Slc45a1	949.667	174.333	38.156	6.18967	-2.62398	3.10084e-42	7.42112e-41	yes	Adam11	99	432	2.272	10.3253	2.18415	3.99836e-21	9.50384e-20	yes
Myo9b	601.667	3063	11.1373	48.0677	2.10966	7.56434e-85	1.80496e-83	yes	Akr1b8	49.6667	464.333	4.98867	40.2107	3.01085	3.39548e-42	8.11556e-41	yes	Nus1	2414.33	1152.67	59.8833	29.383	-1.02717	4.59014e-21	1.08962e-19	yes
Peli3	680.333	26.3333	22.994	0.747333	-4.94336	7.69446e-85	1.83359e-83	yes	Hfe	136.667	1062.67	8.39733	52.4977	2.64425	3.537e-42	8.44266e-41	yes	Fen1	605.667	228	31.182	11.9457	-1.38423	4.64122e-21	1.1003e-19	yes
Naip2	40.3333	759.667	1.16967	18.987	4.02084	8.70996e-85	2.07286e-83	yes	Kcnip1	723.667	99.3333	57.758	7.04767	-3.0348	4.02992e-42	9.60658e-41	yes	Csf1r	5610.67	11750.3	213.829	431.441	1.0127	4.71095e-21	1.11538e-19	yes
Asic1	1229.33	123.667	44.1423	3.95567	-3.48017	1.08783e-84	2.58548e-83	yes	Ptk2b	178.333	1114	6.23033	34.0343	2.44961	4.11286e-42	9.79142e-41	yes	Nfasc	4058.67	8944	67.0427	139.512	1.05724	4.89523e-21	1.1575e-19	yes
Plxnb2	1120	6615.67	23.2547	116.598	2.32595	1.24012e-84	2.94357e-83	yes	Mtus2	542.667	67.6667	14.549	2.378	-2.6131	4.53769e-42	1.07886e-40	yes	Prr18	543.667	1558	18.9617	55.435	1.54771	4.963e-21	1.17199e-19	yes
Kcna1	2439.33	305.333	81.081	8.76467	-3.20959	1.24594e-84	2.95351e-83	yes	Erich3	542	80.3333	10.5823	2.15967	-2.29278	5.39269e-42	1.28046e-40	yes	Orc1	122	10.3333	4.64167	0.403667	-3.52341	4.98783e-21	1.17632e-19	yes
Cdca8	19.6667	578	1.69233	40.6467	4.58605	1.31338e-84	3.10931e-83	yes	Sp110	21.6667	422.667	1.538	25.5397	4.05361	5.53708e-42	1.31303e-40	yes	Il11ra1	435.333	1110	25.997	69.5827	1.42038	5.05171e-21	1.18984e-19	yes
Tacc3	95.3333	1023	5.89767	57.1173	3.27571	1.3262e-84	3.13556e-83	yes	Il13ra1	178.667	1256	6.53633	39.7603	2.60478	6.13508e-42	1.45293e-40	yes	Shank1	66	278	0.863333	3.61167	2.06468	5.13534e-21	1.20797e-19	yes
Trim2	4777	1053.33	92.3163	17.969	-2.36108	1.40126e-84	3.3087e-83	yes	Cdk4	684	2372.33	49.4173	147.441	1.57705	6.70568e-42	1.58599e-40	yes	Rasgrf1	175	757	5.46533	22.5197	2.0428	5.20801e-21	1.22348e-19	yes
Atp1a2	29264.3	4347.33	789.148	99.8063	-2.98309	1.47401e-84	3.47593e-83	yes	Rap2b	323.333	1317.33	6.384	22.7587	1.83388	7.42023e-42	1.7527e-40	yes	Rai14	2206	968.667	53.364	23.9357	-1.1567	5.77293e-21	1.35444e-19	yes
Kifap3	4269.33	1104	143.5	31.918	-2.16861	1.69955e-84	4.00258e-83	yes	Kcnab2	9667.67	1791.67	360.77	61.9903	-2.54096	8.64751e-42	2.03993e-40	yes	Etnppl	3	122.667	0.0953333	4.80133	5.65431	5.97874e-21	1.40091e-19	yes
Arpc1b	607.333	8231.33	48.8277	560.318	3.52047	1.73678e-84	4.08492e-83	yes	Rai14	156	968.667	4.44767	23.9357	2.42804	8.77911e-42	2.06829e-40	yes	S100a11	3981.67	1818.67	888.748	416.49	-1.09349	6.21509e-21	1.45441e-19	yes
Ctla2a	178.667	1526	18.7587	148.876	2.98848	1.74455e-84	4.09789e-83	yes	Scn2a	919.333	144.667	18.8823	2.293	-3.04173	9.56403e-42	2.25028e-40	yes	Ttll7	557	2054.33	10.6093	37.0827	1.80541	6.40503e-21	1.49693e-19	yes
Zcchc12	1383.33	67.3333	87.7457	3.54267	-4.63042	1.88589e-84	4.42414e-83	yes	Lag3	50.6667	785.333	3.31033	45.7257	3.78796	9.92513e-42	2.33221e-40	yes	Adh1	122.333	464	9.402	36.222	1.94583	6.92467e-21	1.61629e-19	yes
Tspo	136.667	1630.67	21.9527	222.659	3.34237	3.05259e-84	7.15185e-83	yes	Kcnab1	2241.67	342.333	92.6017	12.672	-2.86939	1.23865e-41	2.90681e-40	yes	Clip3	2445.33	5319.67	146.566	321.813	1.13467	7.74204e-21	1.80475e-19	yes
Mapre3	2621.67	406	179.669	24.2307	-2.89043	4.73223e-84	1.10727e-82	yes	Nova1	2170.33	550.333	42.81	9.85233	-2.11941	1.2737e-41	2.9852e-40	yes	Adgrl1	857.667	1902	13.174	29.0957	1.14311	8.59812e-21	2.00174e-19	yes
Psd	703.333	58.3333	39.2457	3.096	-3.66406	6.34226e-84	1.48207e-82	yes	Cspg4	337.667	1370.33	5.588	19.7613	1.82228	1.34888e-41	3.15732e-40	yes	Pla2g2d	8	209.667	0.532333	12.211	4.51971	8.72497e-21	2.02867e-19	yes
Col4a2	821	11029	17.0933	194.371	3.50731	6.41028e-84	1.49604e-82	yes	Rin2	519.667	1821.67	15.301	47.0103	1.61935	1.41345e-41	3.3042e-40	yes	Tceal3	152.667	515	15.5423	58.0737	1.90168	9.36148e-21	2.17388e-19	yes
Fbxo44	1415.67	132.667	131.654	10.157	-3.69621	1.47927e-83	3.44787e-82	yes	Olfml2b	172	1078.33	7.48167	40.7037	2.44373	1.67818e-41	3.91799e-40	yes	Brinp1	90	318	3.19967	11.584	1.85614	1.05391e-20	2.44422e-19	yes
Nrp2	817	4615.67	16.9433	81.4823	2.26577	1.48139e-83	3.44838e-82	yes	Slc39a1	845.667	4043.33	47.9327	200.013	2.06102	1.74752e-41	4.07462e-40	yes	Cep192	702	292.333	10.0677	4.67933	-1.10535	1.12288e-20	2.60083e-19	yes
Gdi1	8796	2003.67	442.668	86.3557	-2.35786	1.82421e-83	4.24093e-82	yes	Il10ra	126	1401.67	4.94733	46.527	3.23335	1.80016e-41	4.19196e-40	yes	Mturn	363	1013	7.88433	22.86	1.53576	1.13228e-20	2.61928e-19	yes
Slc6a15	1070.33	119.333	47.423	4.57667	-3.37322	2.56157e-83	5.94751e-82	yes	Gpr137b	936.333	3816.67	42.4947	153.956	1.85716	1.80675e-41	4.20192e-40	yes	Upp1	218.333	40	24.5953	4.763	-2.36844	1.20437e-20	2.78248e-19	yes
Bak1	208.333	1568.67	14.0583	81.4547	2.53457	2.61436e-83	6.06231e-82	yes	Sst	1162	147.667	217.44	23.8457	-3.18882	1.93296e-41	4.48967e-40	yes	Ftl1	144653	59669	16970.9	7203.48	-1.2363	1.29762e-20	2.9941e-19	yes
Cntnap5a	671	10	8.297	0.104667	-6.30872	2.82887e-83	6.55132e-82	yes	Ms4a6b	21	336.667	1.38333	20.6663	3.90106	2.17515e-41	5.04574e-40	yes	F10	554	120.333	34.0893	7.924	-2.10502	1.4429e-20	3.32508e-19	yes
Lrfn5	617.667	11.6667	22.7417	0.365333	-5.95998	3.11002e-83	7.19321e-82	yes	Atp6v0d2	11.3333	2103.33	0.621	97.173	7.28982	2.36766e-41	5.48527e-40	yes	Antxr1	1105.67	2855	24.1417	64.9453	1.4277	1.47353e-20	3.39136e-19	yes
Mapk9	4892	1142.67	166.12	43.1933	-1.94335	3.28608e-83	7.59071e-82	yes	Lamb2	832	5933	24.028	142.283	2.56598	2.6627e-41	6.15694e-40	yes	Pik3ip1	268.333	741	13.6177	37.567	1.46399	1.51153e-20	3.47441e-19	yes
Atp1b2	23059	2508	1084.26	100.135	-3.43669	5.6944e-83	1.31371e-81	yes	Gsap	61	514.667	2.33233	15.9897	2.77729	2.66437e-41	6.15694e-40	yes	Ehd3	603.667	1339.33	18.8417	42.8797	1.18637	1.60216e-20	3.67806e-19	yes
Pfn1	1556	8908.67	242.37	1179.03	2.28232	8.14598e-83	1.8769e-81	yes	Sv2a	6487.67	1987	200.839	53.6787	-1.90362	2.79567e-41	6.45212e-40	yes	Nkd1	276	712.667	14.3303	34.8173	1.28073	1.60902e-20	3.68914e-19	yes
Cald1	695	7039	27.49	224.972	3.03276	8.22218e-83	1.89204e-81	yes	Lima1	391.667	2025.33	12.9693	57.992	2.16075	3.21923e-41	7.4202e-40	yes	Rgma	554.667	1430.67	18.7833	48.592	1.37127	1.62458e-20	3.72013e-19	yes
Plekho1	303	2048.33	31.6273	187.084	2.56444	1.07681e-82	2.47475e-81	yes	Itga8	37.6667	470.333	0.887667	9.46733	3.41487	3.41575e-41	7.86317e-40	yes	Nwd1	118.667	382.667	1.407	4.68033	1.73399	1.64195e-20	3.75515e-19	yes
Tram1	674.333	3779.67	30.9067	148.154	2.26111	1.25361e-82	2.87742e-81	yes	Sbno2	205.333	1177	6.59733	32.941	2.31993	4.0158e-41	9.23278e-40	yes	H2ax	718.333	281	59.1293	23.7987	-1.31299	1.71766e-20	3.92336e-19	yes
Tecr	7256	1491	865.314	150.826	-2.52034	1.38137e-82	3.16664e-81	yes	Gpm6a	6904	2343.67	289.094	85.6917	-1.75431	4.17778e-41	9.58267e-40	yes	Syt3	25.3333	166	1.181	8.45033	2.839	1.74792e-20	3.98745e-19	yes
Slc25a18	1351	61.3333	94.0503	3.62733	-4.69645	1.53388e-82	3.5118e-81	yes	Mmp11	45.6667	455.333	2.979	24.482	3.03882	4.17857e-41	9.58267e-40	yes	Olfml2a	431	1351.67	8.90733	28.4773	1.67675	1.79195e-20	4.08277e-19	yes
Zdhhc22	554.667	17.6667	21.5937	0.728333	-4.88987	1.67133e-82	3.82166e-81	yes	Slc6a1	6092	1934.33	189.775	52.7297	-1.8476	4.36835e-41	1.00052e-39	yes	Mboat2	366.667	930.333	14.184	29.7593	1.06908	1.89485e-20	4.3118e-19	yes
Epb41l3	9127	1950.33	386.626	71.6967	-2.43096	1.87192e-82	4.27492e-81	yes	Rbfox3	1439.33	165.333	86.253	8.44733	-3.35201	4.41674e-41	1.01033e-39	yes	Brip1	170	24.6667	2.81067	0.418	-2.74934	1.93551e-20	4.39879e-19	yes
Fes	63.3333	772.333	3.785	36.0877	3.25314	1.95784e-82	4.46551e-81	yes	Itih3	2888.33	778.667	177.252	42.0053	-2.07716	4.87784e-41	1.1144e-39	yes	Celsr2	379.667	1242.33	5.106	17.99	1.81693	1.96582e-20	4.46208e-19	yes
Scd2	68573.3	21000.7	1691.89	440.515	-1.94138	1.97155e-82	4.49111e-81	yes	Rrbp1	1515	5465.33	39.6217	125.068	1.65836	5.42474e-41	1.23778e-39	yes	Zic1	895	2003.33	26.2247	56.443	1.10587	1.97154e-20	4.46948e-19	yes
Sulf1	281.667	2765	8.12233	66.7207	3.03817	2.5252e-82	5.74508e-81	yes	Cd36	47.3333	705.333	2.402	31.4387	3.71023	6.5873e-41	1.50116e-39	yes	Brinp2	79	395.333	2.109	11.1523	2.40271	2.11825e-20	4.79609e-19	yes
Rps2	5342.33	23585.3	716.574	2692.1	1.90954	4.18206e-82	9.50263e-81	yes	Sp140	32.6667	440	1.96	22.65	3.53059	6.61498e-41	1.50557e-39	yes	Ptgfr	52	254.333	1.68467	6.975	2.04973	2.24367e-20	5.07371e-19	yes
Golm1	215.333	1894.67	7.811	58.1743	2.8968	5.55121e-82	1.25978e-80	yes	Scamp2	401	1845.33	23.006	92.425	2.00627	8.7193e-41	1.98203e-39	yes	Cd200r1	439.333	129.667	26.366	8.02767	-1.71563	2.42144e-20	5.46807e-19	yes
Ada	21.3333	679.333	1.699	45.7943	4.75241	5.97644e-82	1.35459e-80	yes	Pltp	1530	9624	115.039	631.839	2.45743	1.11084e-40	2.52195e-39	yes	Cemip	822.667	3079	13.298	50.514	1.92547	2.42409e-20	5.46807e-19	yes
Luzp2	2271.33	359	62.4647	8.35367	-2.90256	9.26836e-82	2.09808e-80	yes	Lingo4	302.667	17	11.0987	0.547	-4.3427	1.1407e-40	2.58649e-39	yes	Cp	1705	5621	62.9617	208.642	1.72849	2.50127e-20	5.63516e-19	yes
Sav1	167	1165.33	8.90467	52.84	2.569	1.43162e-81	3.23671e-80	yes	Piezo1	152.667	1231	2.69567	19.0003	2.81731	1.28991e-40	2.92116e-39	yes	Aspg	157.667	514.333	7.72367	23.625	1.61296	2.7988e-20	6.29764e-19	yes
Akr1b8	49.6667	1096.67	4.98867	91.4837	4.19679	2.06313e-81	4.65865e-80	yes	Strip2	465	53.3333	11.6617	1.18433	-3.29963	1.29489e-40	2.92877e-39	yes	Plxnb3	506.667	1284.33	9.56467	24.9133	1.38113	2.8276e-20	6.35458e-19	yes
Evi2b	21.3333	666.667	1.579	41.125	4.70293	2.33242e-81	5.26017e-80	yes	Itgb1	2096.67	9382	74.2627	289.197	1.96134	1.38839e-40	3.13635e-39	yes	Plce1	571.333	1293.33	7.549	17.3063	1.19694	2.86084e-20	6.4213e-19	yes
Nalf1	718	65	30.4473	2.42933	-3.64768	3.69653e-81	8.32617e-80	yes	Lmo2	302.667	1252.33	27.6007	95.542	1.79143	1.40255e-40	3.16439e-39	yes	Amt	97.3333	357.667	5.29933	20.1097	1.92401	3.18717e-20	7.14494e-19	yes
Ets1	228.333	1590.67	8.17867	43.405	2.40792	4.11897e-81	9.26615e-80	yes	Igfbp4	566.333	4286.33	31.8617	201.945	2.66407	1.45447e-40	3.27743e-39	yes	Ank1	154.333	673.333	2.998	11.3573	1.92155	3.28768e-20	7.35743e-19	yes
Cebpb	50.6667	819.667	4.53733	62.0097	3.77258	4.71948e-81	1.06039e-79	yes	Zc3hav1	217.333	1271.33	6.191	32.0197	2.37071	1.55108e-40	3.4908e-39	yes	Mapk8ip3	1292	2632	27.9917	57.7077	1.04377	3.29007e-20	7.35743e-19	yes
Slc8a3	762	76.6667	22.3857	2.04467	-3.45264	5.67416e-81	1.27331e-79	yes	Idi1	2896.33	616	156.876	28.7773	-2.44662	1.65577e-40	3.72177e-39	yes	Parpbp	180.667	30.6667	6.82133	1.37133	-2.31447	3.49273e-20	7.801e-19	yes
Ogdhl	2360.33	282.667	84.645	8.641	-3.29215	8.78995e-81	1.97006e-79	yes	Pfn1	1556	5625	242.37	764.621	1.65754	1.67524e-40	3.76089e-39	yes	Sptbn2	208	605.333	2.98967	8.54967	1.51588	3.58341e-20	7.99368e-19	yes
Hilpda	68.6667	817.667	9.40067	94.7027	3.33257	1.00003e-80	2.23855e-79	yes	Pnpla7	259.667	1411	8.76333	38.4523	2.13352	2.41927e-40	5.4245e-39	yes	Dbp	179	845.333	12.1007	58.3477	2.26959	4.02878e-20	8.97615e-19	yes
Nfe2l2	558.667	2773.67	30.3443	128.449	2.0817	1.00746e-80	2.2524e-79	yes	Nfkb2	84	610.333	3.656	22.6977	2.63421	2.79131e-40	6.25094e-39	yes	Acsl3	622.333	1427.67	23.9103	56.6193	1.24366	4.06256e-20	9.04032e-19	yes
Hepacam	2485.33	455.667	107.57	17.1133	-2.65208	1.06461e-80	2.37723e-79	yes	Cdk14	3243.67	1004	90.049	24.515	-1.87705	2.87317e-40	6.42632e-39	yes	Aldh6a1	501.667	1289.33	16.9263	44.5887	1.39741	4.11957e-20	9.15594e-19	yes
Dscam	924	117.333	20.233	2.19333	-3.20551	1.31447e-80	2.93155e-79	yes	Myh9	1599.33	8236.67	28.98	129.762	2.16274	3.11401e-40	6.95642e-39	yes	Hey2	88	328	3.93733	15.1303	1.94215	4.35761e-20	9.67314e-19	yes
Dok6	955.333	98	12.8213	1.10767	-3.53295	1.42568e-80	3.17566e-79	yes	Ndrg4	21652	3338.67	1005.33	139.742	-2.84683	3.30121e-40	7.36551e-39	yes	Scd1	4020.33	7967.33	96.1223	195.396	1.02345	4.42764e-20	9.81658e-19	yes
Kif11	28	649	0.790667	15.3943	4.28319	1.8207e-80	4.05056e-79	yes	Chrna4	882.667	186	26.1917	4.78533	-2.45242	3.55016e-40	7.91122e-39	yes	Ccnyl1	1012.67	435.667	58.7767	24.1027	-1.28605	5.35763e-20	1.1864e-18	yes
Enho	1695.67	134	177.927	12.023	-3.88742	2.25721e-80	5.01549e-79	yes	Msmo1	3128.67	977.667	211.245	56.7923	-1.89515	3.97568e-40	8.84857e-39	yes	Slc14a1	380.333	1308.67	12.742	44.3697	1.79998	5.40672e-20	1.19581e-18	yes
Ckap2	33.3333	661	1.74033	29.0023	4.05873	3.2157e-80	7.13648e-79	yes	Ifi207	8.33333	334.333	0.335	11.5047	5.10191	4.09126e-40	9.09465e-39	yes	Cnn2	2824	1149.67	131.388	54.5807	-1.26737	5.42416e-20	1.1982e-18	yes
Prkce	1594.67	232.333	34.3967	4.27	-3.00996	3.37617e-80	7.48343e-79	yes	Itgbl1	225	1846	8.02433	54.1347	2.7541	4.33385e-40	9.6221e-39	yes	Cd36	9477	705.333	396.507	31.4387	-3.65674	5.45056e-20	1.20257e-18	yes
Scd1	17061.7	4020.33	477.975	96.1223	-2.31399	3.43423e-80	7.6028e-79	yes	Sox4	197.333	997.333	5.56267	24.427	2.13463	6.04776e-40	1.34109e-38	yes	Synpo2	143	467.333	2.19567	8.56567	1.96391	5.62651e-20	1.23988e-18	yes
Magee1	2760.33	410.667	104.147	13.2063	-2.97932	4.59832e-80	1.01674e-78	yes	Fkbp9	950	4736	42.407	183.918	2.11669	6.13922e-40	1.35971e-38	yes	Plp1	35136	70907.3	1359.22	2776.53	1.0305	5.97828e-20	1.31421e-18	yes
Necab3	691.667	15.3333	51.996	1.093	-5.57204	4.94814e-80	1.09276e-78	yes	Fcgr4	7.66667	398.333	0.816	36.6087	5.48747	6.24246e-40	1.38089e-38	yes	Gabrg2	37.6667	220	1.441	8.43933	2.55006	6.32546e-20	1.38884e-18	yes
Brinp1	795	90	33.3197	3.19967	-3.38038	6.77497e-80	1.49438e-78	yes	Vat1	1622.67	6823	79.124	288.376	1.86577	6.55331e-40	1.44788e-38	yes	Fanca	190	31	5.47333	0.855	-2.67842	6.51308e-20	1.42692e-18	yes
Mlc1	3916.67	245	188.342	9.91233	-4.24799	7.13335e-80	1.57151e-78	yes	Fbn2	59.3333	507.667	0.723	5.37967	2.89545	7.51966e-40	1.65936e-38	yes	Tfdp1	1940.67	943	97.1067	47.2597	-1.03896	6.51463e-20	1.42692e-18	yes
Bmp1	344.667	3581.33	12.2383	107.559	3.13565	8.24993e-80	1.81529e-78	yes	Map7d2	4394	617	181.642	23.7223	-2.93678	7.85986e-40	1.73233e-38	yes	Ckap4	3555	1458.33	131.67	55.0963	-1.2569	7.61878e-20	1.66676e-18	yes
Gabra5	757	7	40.5097	0.307333	-7.04232	9.15476e-80	2.01193e-78	yes	Lgi2	3161.33	566.333	67.6047	10.6443	-2.66704	8.25659e-40	1.81755e-38	yes	Tead2	559.667	213.667	30.176	11.5227	-1.38893	7.69056e-20	1.68043e-18	yes
Mmp13	7	1035.33	0.351	44.7727	6.995	1.90184e-79	4.17459e-78	yes	Phospho1	623	65.3333	85.8063	10.813	-2.98832	8.44284e-40	1.8563e-38	yes	Cyp26b1	352.333	1258	9.26767	33.8403	1.86847	7.85137e-20	1.71351e-18	yes
Stxbp2	96.6667	983.333	7.308	59.2463	3.01918	3.23165e-79	7.08496e-78	yes	Nid1	1628.33	12953.3	36.292	247.911	2.7721	9.19828e-40	2.01994e-38	yes	Lonrf2	137.667	407	2.65267	7.79	1.55418	9.54723e-20	2.07861e-18	yes
Lcp2	71	884	3.111	32.1897	3.37115	3.38627e-79	7.41495e-78	yes	Mvp	288.667	1716	13.6807	70.6347	2.36824	9.26564e-40	2.03227e-38	yes	Abca8a	146.667	728.333	5.629	21.1963	1.91286	9.88877e-20	2.14959e-18	yes
Kif2c	11.3333	570.667	0.553333	22.9893	5.37667	4.3425e-79	9.49731e-78	yes	Man1c1	530.667	2694.67	15.1733	66.674	2.13559	9.46316e-40	2.07309e-38	yes	Flt4	420	83	7.66067	1.54667	-2.30831	1.0353e-19	2.24596e-18	yes
Ctla2b	14.6667	628.333	1.814	71.5933	5.30258	4.49169e-79	9.81173e-78	yes	Kcng4	1634.33	241	57.3543	7.44967	-2.94465	9.5165e-40	2.08225e-38	yes	Sugct	18.3333	151	1.29667	10.4983	3.01728	1.07333e-19	2.32569e-18	yes
Fbxo31	1917.67	270.333	66.5003	7.812	-3.0896	5.28494e-79	1.15306e-77	yes	Cd300ld3	13.6667	403.667	2.17133	55.4037	4.67333	9.64613e-40	2.10807e-38	yes	Cacng7	326.333	885.667	16.77	46.8643	1.48261	1.12109e-19	2.42627e-18	yes
Ctsh	626	7572.67	54.3407	551.981	3.34451	6.68578e-79	1.45694e-77	yes	Col4a6	76	814	1.545	14.214	3.20163	9.95207e-40	2.17231e-38	yes	Rcc1	544.667	213.333	27.2313	10.9307	-1.31689	1.12864e-19	2.4397e-18	yes
Arhgap36	686.333	29.3333	30.872	1.13967	-4.75962	7.05027e-79	1.53451e-77	yes	Nalcn	1605.33	439.333	30.3887	7.25567	-2.06635	1.02682e-39	2.23862e-38	yes	Eme1	121	11.6667	5.69267	0.563	-3.3379	1.1523e-19	2.48787e-18	yes
Clstn2	1189	93.6667	36.973	2.507	-3.88244	9.78114e-79	2.12634e-77	yes	Irf1	110.667	1378.67	7.04567	78.752	3.48251	1.03257e-39	2.24844e-38	yes	Tmcc2	555.667	1222	19.1813	43.3937	1.17778	1.27879e-19	2.75768e-18	yes
Diras1	1794	260.667	82.1403	10.122	-3.0206	1.15131e-78	2.49986e-77	yes	Nalf1	718	154.333	30.4473	5.67733	-2.42303	1.04947e-39	2.2825e-38	yes	Polh	542	196.667	19.3703	7.328	-1.40236	1.29582e-19	2.79109e-18	yes
Lrrc49	3018.67	425.667	141.353	16.87	-3.06677	1.35652e-78	2.94189e-77	yes	Fosl2	170.333	964.667	3.509	17.2873	2.30058	1.08575e-39	2.35857e-38	yes	Phgdh	795	1945.33	51.3867	125.598	1.28935	1.3194e-19	2.8385e-18	yes
Ccnb2	9	625.333	0.788667	46.594	5.88458	1.41659e-78	3.06849e-77	yes	Grm4	673	97.6667	20.174	2.63533	-2.93644	1.14068e-39	2.47493e-38	yes	Iqgap1	10960.3	4164.67	169.293	65.373	-1.37275	1.36636e-19	2.93607e-18	yes
Lmnb1	100.667	1199	4.705	48.3747	3.36199	1.92075e-78	4.15557e-77	yes	Slc7a2	862.667	3315.67	17.949	55.9777	1.64095	1.28388e-39	2.7823e-38	yes	Plvap	663	130	37.7357	7.582	-2.31528	1.54691e-19	3.32008e-18	yes
Gnai1	2705.33	663.667	116.275	24.1927	-2.2649	1.94031e-78	4.19287e-77	yes	Lamp2	2792.67	10444.3	155.174	452.979	1.54556	1.31005e-39	2.83562e-38	yes	Efnb3	1219.33	2572	43.7803	94.6287	1.11199	1.54928e-19	3.32125e-18	yes
Furin	402.333	3127	13.5903	86.3987	2.66843	2.41131e-78	5.20445e-77	yes	Hs6st2	924	118.667	28.7287	3.23933	-3.14872	1.52193e-39	3.29032e-38	yes	Slc13a4	499	1656.67	16.693	56.4767	1.75841	1.65034e-19	3.53371e-18	yes
Slc45a1	949.667	53.3333	38.156	1.792	-4.41227	2.78838e-78	6.01113e-77	yes	Myo1e	623.333	2187	18.1717	55.294	1.60543	1.65593e-39	3.57574e-38	yes	Fgfr3	625.667	1656.67	22.7923	56.923	1.32046	1.71329e-19	3.66418e-18	yes
Unc5a	571.667	19.6667	19.6773	0.587333	-5.06621	3.77968e-78	8.13847e-77	yes	Il4ra	187.333	1423.33	6.721	42.6323	2.6652	2.44075e-39	5.26418e-38	yes	Jakmip1	25	190.667	2.02467	11.665	2.52643	1.769e-19	3.77887e-18	yes
Ptk2b	178.333	1358.67	6.23033	39.7997	2.67538	3.94942e-78	8.49384e-77	yes	Ybx1	1706.33	6145	141.619	446.857	1.6578	2.66365e-39	5.73809e-38	yes	Myo6	907.667	1989.33	15.8683	33.3363	1.07094	1.83362e-19	3.91229e-18	yes
Fndc3b	278.333	2427.33	5.89233	43.039	2.86873	5.68714e-78	1.22165e-76	yes	Rhoc	413.333	1968.67	49.537	201.798	2.02633	2.76723e-39	5.95415e-38	yes	Shisal1	116	548	2.877	12.8653	2.16085	1.91553e-19	4.08225e-18	yes
Vat1l	3971	906.667	145.732	28.242	-2.36741	6.19129e-78	1.32837e-76	yes	Ppib	977.667	4173.33	147.317	547.202	1.89315	2.77419e-39	5.96204e-38	yes	Fam111a	1114.67	403	38.8563	14.5183	-1.42027	1.99438e-19	4.24158e-18	yes
Myl12a	403	2871.33	52.4427	349.338	2.73581	7.55526e-78	1.6191e-76	yes	Tspan7	8910	2910	688.92	196.471	-1.81002	3.08442e-39	6.62091e-38	yes	Ugdh	1653.67	753.667	74.293	34.6973	-1.0984	1.99496e-19	4.24158e-18	yes
Serp1	1325.67	5276	38.649	131	1.76106	8.38065e-78	1.79386e-76	yes	Pald1	243.333	1411.33	7.722	38.4713	2.31674	3.20433e-39	6.87016e-38	yes	Slc13a3	333.333	941.333	11.2383	32.9893	1.55357	2.00933e-19	4.26711e-18	yes
Hmgn1	796.667	3340.33	49.243	175.623	1.83449	8.64101e-78	1.8474e-76	yes	Dab2	406.333	3121	15.5347	101.021	2.70109	3.29447e-39	7.05508e-38	yes	Rhbdl3	45.6667	208	1.398	6.53333	2.22445	2.04156e-19	4.33049e-18	yes
Tgif1	46.3333	805.667	4.00433	60.994	3.92903	9.66921e-78	2.06478e-76	yes	Lmtk3	803.667	182	27.9887	5.681	-2.30063	3.6201e-39	7.74326e-38	yes	Fgfr2	750.667	1577.67	28.7057	59.1277	1.0425	2.09701e-19	4.44291e-18	yes
Stau2	2989	443.333	137.858	20.2573	-2.76667	1.03463e-77	2.20676e-76	yes	Adam22	2368.67	752	47.3093	12.7737	-1.88895	3.65375e-39	7.806e-38	yes	Ncmap	182.333	621	14.7523	51.2667	1.79708	2.17138e-19	4.59511e-18	yes
S100a4	48	1249.33	12.993	285.334	4.45685	1.06247e-77	2.26347e-76	yes	P4hb	3329.33	12228.3	157.055	524.507	1.73969	3.88773e-39	8.29612e-38	yes	Axin2	123.667	406.333	3.515	12.815	1.86624	2.26063e-19	4.77286e-18	yes
Eef1a1	32863.3	125261	2471.49	7996.65	1.69401	1.2105e-77	2.57581e-76	yes	Tec	48.3333	564.333	2.51633	25.442	3.33782	3.97326e-39	8.46866e-38	yes	Myof	6598.67	2482.67	116.293	53.4097	-1.12259	2.34423e-19	4.94361e-18	yes
Rdh10	121.333	1401.33	4.51533	44.8093	3.31089	1.32366e-77	2.81327e-76	yes	Mob1a	719.333	2782.33	22.818	75.3707	1.72383	4.32255e-39	9.20231e-38	yes	C5ar1	986	270.333	76.2583	19.134	-1.99476	2.37405e-19	5.00066e-18	yes
Adam17	477.333	2209.33	14.7937	57.8513	1.96737	1.40697e-77	2.98684e-76	yes	Gpr34	208.333	979.333	14.5023	59.5897	2.03878	5.01273e-39	1.06591e-37	yes	Smad9	76.3333	343	1.64033	7.49033	2.19104	2.4907e-19	5.24029e-18	yes
Prr11	33.6667	580.333	1.17633	17.3747	3.88462	1.42556e-77	3.02276e-76	yes	Iqgap2	62.6667	526.667	1.44833	10.587	2.86983	5.45224e-39	1.15801e-37	yes	C1s2	37	262	1.599	11.4603	2.84141	2.50524e-19	5.26478e-18	yes
Cdk5r1	879.667	88	29.9477	2.51367	-3.57458	1.47498e-77	3.12388e-76	yes	Ggt7	1135	266.333	58.2627	11.9723	-2.28287	5.61554e-39	1.1913e-37	yes	Fabp5	24882.7	9382.67	2854.29	1111.45	-1.36069	2.56845e-19	5.39137e-18	yes
Nyap1	782	72.3333	36.85	2.95267	-3.64157	1.57136e-77	3.32412e-76	yes	Acsl6	4948	1425	169.943	44.5997	-1.92995	6.67106e-39	1.41356e-37	yes	Amy1	18.3333	160	1.19767	10.8423	3.17838	2.69106e-19	5.6422e-18	yes
Cd52	45.3333	766.333	11.7773	170.089	3.85221	1.64773e-77	3.48159e-76	yes	Gpr65	12.3333	306.333	0.824667	17.34	4.39415	6.98885e-39	1.47917e-37	yes	Stab1	8593	2765.33	127.787	44.6447	-1.51719	2.82486e-19	5.9159e-18	yes
Rhoc	413.333	3396	49.537	340.903	2.78278	2.06141e-77	4.35061e-76	yes	Sgsm1	1251.33	222.667	32.9803	5.44	-2.59993	7.63636e-39	1.61433e-37	yes	Pdgfd	91.3333	345.333	3.93533	15.1813	1.94774	2.83576e-19	5.93187e-18	yes
Flywch1	5737.67	844.667	373.4	43.467	-3.10273	2.50737e-77	5.28565e-76	yes	Rnaset2b	384	1708.33	56.563	220.165	1.96065	7.75518e-39	1.63754e-37	yes	Ltbp4	1107	3308	24.545	78.8067	1.68289	2.93632e-19	6.13515e-18	yes
Adam11	995	99	28.433	2.272	-3.64553	2.5645e-77	5.39979e-76	yes	Plscr1	47	405	3.68767	27.0177	2.87312	9.04439e-39	1.90753e-37	yes	Kmt5a	2225.67	1106.33	117.738	56.6243	-1.05609	3.43579e-19	7.17048e-18	yes
Ppp1r9a	2067	345	32.218	5.358	-2.5881	3.40711e-77	7.16563e-76	yes	Lpcat4	998	214.667	58.664	11.0887	-2.40339	9.4903e-39	1.99925e-37	yes	Ms4a6d	3131.67	1435	252.87	118.957	-1.08796	3.53416e-19	7.36731e-18	yes
Pink1	7376.33	1322.33	428.548	67.9673	-2.65654	5.00711e-77	1.05184e-75	yes	Map1a	31035.7	9664.67	399.006	109.496	-1.86553	1.04764e-38	2.20443e-37	yes	Cdk2	613.333	253.333	30.4383	12.7863	-1.25129	3.64527e-19	7.59019e-18	yes
Cebpa	133	1473.67	6.791	63.964	3.23556	5.44101e-77	1.14167e-75	yes	Gpr26	630.667	69	7.39367	0.703	-3.39469	1.15831e-38	2.43447e-37	yes	Htr2b	706.333	220	42.2007	13.384	-1.65676	3.99664e-19	8.31227e-18	yes
Fam169a	700.333	49	20.4787	1.13767	-4.16997	5.46571e-77	1.14552e-75	yes	Hipk4	537.667	66.6667	24.5857	2.706	-3.18358	1.21143e-38	2.54317e-37	yes	Scrg1	196.333	561.667	32.1657	94.1313	1.54915	4.38501e-19	9.10957e-18	yes
B2m	1697.67	10814.3	263.751	1439.86	2.44867	5.62301e-77	1.17712e-75	yes	Aak1	5166.67	1660.67	121.323	17.803	-2.76866	1.22416e-38	2.56692e-37	yes	Eri1	840.333	332.667	19.511	7.808	-1.32126	4.41065e-19	9.15235e-18	yes
Glipr1	16.3333	1008.67	2.064	106.534	5.68972	7.1242e-77	1.48966e-75	yes	B3gnt7	13.3333	283.333	0.727667	12.8863	4.14642	1.31148e-38	2.74684e-37	yes	Fasn	2616.67	5316	34.336	72.146	1.0712	4.53543e-19	9.40052e-18	yes
Cd36	47.3333	9477	2.402	396.507	7.36697	8.69112e-77	1.8152e-75	yes	Rcsd1	103.667	681.667	5.39467	29.9667	2.47375	1.3658e-38	2.8573e-37	yes	Chek1	158.333	25.6667	6.011	0.963333	-2.6415	4.70382e-19	9.73842e-18	yes
Tes	93.6667	1550.67	5.16	73.193	3.82626	9.1309e-77	1.90485e-75	yes	H2-Eb1	5.33333	437.333	0.635667	39.0843	5.94218	1.50084e-38	3.13619e-37	yes	Arhgap44	164	447.333	4.909	14.0833	1.52049	4.78901e-19	9.8922e-18	yes
P2rx4	291.667	1665	23.229	114.867	2.30597	9.17401e-77	1.91164e-75	yes	Cpeb3	1302.33	287.333	44.144	9.062	-2.28432	1.52411e-38	3.18115e-37	yes	Chn2	344	857.667	15.0997	36.486	1.27283	4.84657e-19	9.99971e-18	yes
Slc4a8	2376.33	402	27.7597	7.37333	-1.9126	9.31119e-77	1.93799e-75	yes	Arsb	1544.33	5166	51.4673	150.09	1.5441	1.56471e-38	3.26212e-37	yes	Cnmd	4	108.333	0.323333	9.16533	4.82509	4.86696e-19	1.00304e-17	yes
Sec24d	277	2179.67	9.57133	63.8593	2.73811	1.05621e-76	2.19582e-75	yes	Fndc3b	278.333	1521	5.89233	26.557	2.17218	1.57301e-38	3.27565e-37	yes	Nbl1	2221.67	5048	141.691	329.001	1.21535	5.49876e-19	1.13196e-17	yes
Tagln	230	3929	19.332	284.335	3.87853	1.18366e-76	2.45796e-75	yes	Adam17	477.333	1695	14.7937	45.42	1.61835	1.64384e-38	3.41923e-37	yes	Patj	114	365.667	3.732	10.671	1.51567	5.77766e-19	1.18802e-17	yes
Apbb1ip	113.333	1147.67	5.48767	47.3033	3.10768	1.30327e-76	2.70323e-75	yes	Insig1	2444	650.667	121.164	28.3513	-2.09548	2.06433e-38	4.28893e-37	yes	Napb	131	558.667	3.42433	14.9387	2.12516	6.27805e-19	1.28945e-17	yes
Pdia3	4024.33	15823.7	195.86	655.717	1.74325	1.42759e-76	2.95771e-75	yes	Clic1	385.667	2796	35.498	222.608	2.64869	2.22898e-38	4.62571e-37	yes	Mfsd2a	143.333	453.667	8.456	26.1967	1.63134	6.30876e-19	1.2943e-17	yes
Csf2ra	50	726.333	3.653	44.6633	3.61194	1.45112e-76	3.00303e-75	yes	Dffa	1771.33	428	108.298	22.787	-2.24872	2.48989e-38	5.16125e-37	yes	Atp8a2	111.667	553	1.38733	7.15533	2.3667	6.64258e-19	1.36124e-17	yes
Rhbdf2	24.3333	584.333	0.91	18.488	4.34458	1.91438e-76	3.95719e-75	yes	Cln3	176	776.667	12.9367	61.1933	2.24191	2.55846e-38	5.29732e-37	yes	Stum	50.6667	256.333	1.01333	6.18067	2.60865	6.84641e-19	1.40143e-17	yes
Cntnap4	560.667	13.3333	15.5167	0.319	-5.60412	1.97248e-76	4.07262e-75	yes	Eef1a1	32863.3	100160	2471.49	6540.09	1.40393	2.73799e-38	5.66258e-37	yes	Rab7b	2123.67	879	106.178	44.188	-1.26476	6.91798e-19	1.41448e-17	yes
Hif1a	2011	8397.67	58.2693	209.134	1.84362	2.00911e-76	4.14354e-75	yes	Hcn1	960	200	9.14733	1.665	-2.45783	3.01279e-38	6.22381e-37	yes	Cdkn3	115.333	12	14.3363	1.51233	-3.24483	6.97584e-19	1.42471e-17	yes
Gsap	61	749	2.33233	23.1967	3.31407	2.08611e-76	4.29743e-75	yes	Ptges	99.6667	797	3.70433	25.4913	2.78272	3.4674e-38	7.15477e-37	yes	Kcnq2	105.667	391.333	1.674	6.379	1.93003	7.08625e-19	1.44563e-17	yes
Tmem123	596.333	2507.67	27.8323	99.1833	1.83334	2.46652e-76	5.07531e-75	yes	Uap1l1	224	1375.33	8.903	47.974	2.42989	3.48132e-38	7.17532e-37	yes	Eaf1	1964.33	954	45.5597	22.755	-1.00157	7.26605e-19	1.47925e-17	yes
Calr	5934.33	20762.3	365.961	1089.13	1.57341	2.76375e-76	5.68046e-75	yes	Map2k4	3316.67	1049.33	151.359	36.6863	-2.04466	3.49106e-38	7.18722e-37	yes	Socs3	1544.33	602.333	69.123	27.624	-1.32324	7.26739e-19	1.47925e-17	yes
Ptgs2	46.6667	984.333	1.41233	25.074	4.15004	2.87343e-76	5.89918e-75	yes	Aprt	145	728	23.084	101.172	2.13184	3.58171e-38	7.36548e-37	yes	Htra1	1546	3994	86.4633	227.928	1.39842	7.41972e-19	1.50856e-17	yes
Scn2a	919.333	66.3333	18.8823	1.152	-4.03482	3.25568e-76	6.67635e-75	yes	Nrxn1	2546.67	733.333	52.8983	13.0567	-2.01844	4.09243e-38	8.40618e-37	yes	Ccl9	2064.67	544.333	77.5213	21.396	-1.85725	7.59503e-19	1.54248e-17	yes
Pde1b	2521	326	107.354	11.6393	-3.2053	3.5018e-76	7.17295e-75	yes	Fbxl16	1893.67	423	75.4963	14.29	-2.4014	4.39152e-38	9.01033e-37	yes	Timeless	433.333	149	11.2487	3.97367	-1.50121	7.98068e-19	1.61899e-17	yes
Igf2r	671.333	3341.67	10.181	42.964	2.07725	3.57177e-76	7.30799e-75	yes	Loxl3	64	497.333	2.107	14.1593	2.74849	4.47078e-38	9.16257e-37	yes	Ddx21	2197	966.667	53.41	24.014	-1.15323	8.35983e-19	1.69401e-17	yes
Pdia4	795	3601	44.7217	172.132	1.94447	5.65968e-76	1.15669e-74	yes	Sprr1a	2.33333	474.333	0.382	68.6753	7.49008	4.59046e-38	9.39722e-37	yes	Kcnt1	36.6667	244	0.827667	5.96467	2.84932	8.63159e-19	1.74713e-17	yes
Abhd3	1661.33	174.333	113.647	10.217	-3.47552	6.41721e-76	1.31002e-74	yes	Siglecf	21.6667	307.667	1.16867	14.135	3.59634	5.20384e-38	1.06409e-36	yes	Fosl2	2375.33	964.667	41.4657	17.2873	-1.2622	8.83583e-19	1.78647e-17	yes
Slc6a9	4818.67	566.667	255.151	25.5863	-3.3179	8.48814e-76	1.73083e-74	yes	Wasf3	2244.67	548.333	84.211	19.7973	-2.0887	5.68515e-38	1.16119e-36	yes	Sparc	30472.3	63674.7	1616.56	3355.44	1.05357	9.79395e-19	1.97798e-17	yes
6330403K07Rik	3815.33	386.667	343.099	29.2667	-3.5513	9.74318e-76	1.98451e-74	yes	Sec61a1	967.667	3882.33	41.0007	143.166	1.80397	6.12673e-38	1.24998e-36	yes	Ccdc92	121	506.333	6.22767	24.784	1.99265	9.8408e-19	1.98524e-17	yes
Colgalt1	450.667	3250	18.9443	115.089	2.60291	1.01349e-75	2.06199e-74	yes	C6	4.33333	404.333	0.207333	16.656	6.32795	6.28001e-38	1.27981e-36	yes	Sez6l2	752.333	2504.33	25.977	87.1683	1.74657	1.00143e-18	2.018e-17	yes
Kcnk1	1469.67	77.3333	90.5633	4.05633	-4.48068	1.38695e-75	2.81862e-74	yes	Clec4d	8.66667	265.667	1.03067	24.7093	4.58341	6.35756e-38	1.29292e-36	yes	Dner	449.333	1197.67	14.027	38.7183	1.46481	1.01659e-18	2.04627e-17	yes
Apoc2	5.33333	940.333	1.15767	170.768	7.20467	2.28689e-75	4.64232e-74	yes	Abcc8	400.333	41	13.552	1.264	-3.42244	6.35864e-38	1.29292e-36	yes	Me3	66.3333	253.667	1.701	6.64333	1.96552	1.08102e-18	2.17113e-17	yes
Il10rb	253.667	2676.33	18.4377	164.654	3.15871	2.47802e-75	5.02466e-74	yes	Socs3	54	602.333	2.862	27.624	3.27083	7.25499e-38	1.47353e-36	yes	Slc22a6	66.6667	269.667	1.92533	7.93967	2.04397	1.10925e-18	2.22537e-17	yes
Gpr26	630.667	20.6667	7.39367	0.202	-5.19386	2.64019e-75	5.34749e-74	yes	Sting1	93.3333	684.333	5.89633	37.2297	2.65856	7.90413e-38	1.60357e-36	yes	Lrrc55	157.667	610	5.36533	21.5817	2.00807	1.12984e-18	2.26167e-17	yes
Cd276	103.667	1311.33	4.30633	46.288	3.42611	2.86201e-75	5.79028e-74	yes	Wwtr1	520.667	2051	14.9187	51.187	1.77866	7.92059e-38	1.60511e-36	yes	Polq	169.333	24.3333	2.33	0.357	-2.70633	1.14141e-18	2.28231e-17	yes
Cndp2	930	4628.67	58.979	245.628	2.0582	2.97449e-75	6.01112e-74	yes	Gabbr1	8872.67	2468.67	321.88	86.05	-1.90327	8.69288e-38	1.75965e-36	yes	Dok6	98	314.333	1.10767	3.65367	1.72182	1.20217e-18	2.40116e-17	yes
Camk1g	547	20.6667	30.144	0.954	-4.98174	3.31026e-75	6.68222e-74	yes	Glp1r	312	26	7.22433	0.521333	-3.79259	9.17737e-38	1.85565e-36	yes	Rap1gap	275.333	680.333	11.6183	30.4503	1.39005	1.26782e-18	2.52951e-17	yes
Klf6	544.333	2794.67	17.3547	76.153	2.13358	3.87987e-75	7.82332e-74	yes	Cabp1	930.667	171.667	120.475	20.452	-2.55842	9.34875e-38	1.8882e-36	yes	Ntrk3	499.333	1168	10.4633	24.8453	1.24763	1.46868e-18	2.92703e-17	yes
Slc29a4	582.667	36.3333	28.0413	1.48133	-4.24259	3.89715e-75	7.84942e-74	yes	Rnaset2a	428.333	1885.33	31.6713	122.639	1.95317	9.41565e-38	1.89959e-36	yes	Epdr1	731.333	1660.67	38.486	82.8053	1.10539	1.51211e-18	3.01027e-17	yes
Ttc7	132	1108.33	3.929	27.6063	2.81277	4.24624e-75	8.54301e-74	yes	Gpx8	200.667	1552	26.6423	182.19	2.77365	9.50893e-38	1.91628e-36	yes	Adamtsl1	372	1164.67	7.67933	20.3497	1.40595	1.53747e-18	3.05741e-17	yes
Hoxb5	577.333	39.3333	40.9723	2.36667	-4.11372	5.03849e-75	1.01257e-73	yes	Hnrnpf	1603	4948	113.944	303.554	1.41363	9.80005e-38	1.97275e-36	yes	Tie1	1416	419.333	39.1677	11.9453	-1.71322	1.55973e-18	3.09827e-17	yes
Fabp5	2732	24882.7	369.699	2854.29	2.94871	8.07987e-75	1.62198e-73	yes	Erap1	263.667	1283.67	8.17167	29.2507	1.83977	1.08933e-37	2.19039e-36	yes	Kcnma1	78.3333	292.667	1.28167	4.23133	1.72309	1.62604e-18	3.22294e-17	yes
Csrp2	126.333	1133.33	14.6143	119.096	3.02667	8.30357e-75	1.66504e-73	yes	Casp8	67.6667	580	4.56233	33.5147	2.87695	1.21531e-37	2.43965e-36	yes	Prrt1	77.3333	305	4.51433	18.3983	2.02699	1.83235e-18	3.62789e-17	yes
Ripk1	116.667	1252.67	3.89567	37.125	3.25245	9.51344e-75	1.90553e-73	yes	Tmem150a	50	490.333	4.89167	37.6023	2.94242	1.21599e-37	2.43965e-36	yes	Nlgn3	307	753.667	6.30133	14.1637	1.16847	1.87992e-18	3.71801e-17	yes
Trem6l	8.66667	684	0.438	21.0003	5.58334	1.55741e-74	3.11603e-73	yes	Srrm3	448.333	66.6667	29.458	3.737	-2.97871	1.24746e-37	2.50003e-36	yes	Ccdc74a	19.3333	149.333	2.77733	20.4307	2.87896	1.88464e-18	3.7233e-17	yes
Trim9	2091.33	323	71.1263	9.52633	-2.90039	1.62936e-74	3.25639e-73	yes	Ptpn1	459	2047	14.6707	56.6933	1.95024	1.25363e-37	2.50962e-36	yes	Cntnap2	41.3333	269	1.44267	8.23367	2.5128	1.96164e-18	3.87119e-17	yes
Begain	903	60.3333	46.711	2.623	-4.15447	1.70264e-74	3.39908e-73	yes	Tmed3	556	1996.67	55.6897	173.711	1.64121	1.45963e-37	2.91878e-36	yes	Col23a1	463	1260	9.374	26.0967	1.47713	2.15919e-18	4.25181e-17	yes
Cntn4	573.667	39	19.047	0.985333	-4.27281	1.72056e-74	3.43106e-73	yes	Rufy3	4224.33	1307	156.82	41.21	-1.92805	1.5676e-37	3.13123e-36	yes	Islr	2260.33	5164.67	123.935	288.473	1.21885	2.20227e-18	4.33192e-17	yes
Plod3	577.333	3200	24.3747	119.273	2.29081	1.75061e-74	3.48715e-73	yes	Sh3bgr	373.333	44	55.7177	6.205	-3.16663	1.7523e-37	3.4963e-36	yes	Ptprt	126.333	509.333	1.207	5.012	2.05396	2.25429e-18	4.42946e-17	yes
Rnh1	702	4864.67	54.631	308.61	2.49799	1.79455e-74	3.57075e-73	yes	Efna3	506	71.3333	31.7047	3.95733	-3.00209	2.07051e-37	4.12668e-36	yes	Gpr34	375	979.333	22.1117	59.5897	1.43025	2.27165e-18	4.45873e-17	yes
Lingo1	708	64.6667	32.3417	2.798	-3.53093	1.85081e-74	3.67863e-73	yes	Bcl2a1d	14	284	2.11333	38.5717	4.18995	2.09006e-37	4.16105e-36	yes	Trim9	323	747.333	9.52633	22.3373	1.22946	2.33196e-18	4.57215e-17	yes
Bst2	56.6667	787	9.58867	114.088	3.57267	2.00356e-74	3.97786e-73	yes	Prdx6	5337	17743.3	488.904	1404.09	1.52201	2.12252e-37	4.22104e-36	yes	Chrna4	30	186	0.739	4.78533	2.69497	2.39608e-18	4.6928e-17	yes
Abca2	11115.7	2984.33	186.076	42.4643	-2.13157	2.06747e-74	4.10026e-73	yes	Tor3a	182	1035	8.11667	37.7173	2.21627	2.14195e-37	4.25501e-36	yes	Abracl	736	297.667	109.179	50.1213	-1.12319	2.43975e-18	4.77317e-17	yes
Unc93b1	278.667	2535.67	19.3727	141.966	2.87345	2.72014e-74	5.38873e-73	yes	Rims4	396.667	52.6667	10.7033	1.24533	-3.10346	2.1693e-37	4.30463e-36	yes	Fbln2	4298.33	1607.33	106.301	40.0387	-1.40869	2.46013e-18	4.80786e-17	yes
F7	4	1210	0.288667	73.879	7.99962	3.39509e-74	6.71849e-73	yes	Egfl8	57.3333	684	6.66767	69.7783	3.38753	2.18788e-37	4.33675e-36	yes	Lgi4	807	2084.67	25.287	69.8683	1.46624	2.61613e-18	5.10723e-17	yes
Myo1c	410.333	3208	12.0967	79.8953	2.7235	3.54099e-74	6.99955e-73	yes	Apobr	31.3333	336	1.24433	11.0127	3.14572	2.48974e-37	4.92968e-36	yes	Sdk1	267.333	821.333	3.59967	11.292	1.64937	2.7675e-18	5.39693e-17	yes
Nrp1	344	2777	12.987	88.252	2.76456	4.01618e-74	7.9302e-73	yes	Ogfod1	1740.67	548	44.1247	12.1363	-1.86225	2.50131e-37	4.94719e-36	yes	Igf2bp2	487	141.667	16.3517	4.62133	-1.82306	3.18542e-18	6.19859e-17	yes
Rrm1	476.667	2329.67	15.9997	68.0547	2.08865	4.11865e-74	8.12366e-73	yes	Ikbke	17	313.333	0.702333	11.479	4.0307	2.55113e-37	5.04022e-36	yes	Asap3	332.667	801	8.99933	22.1507	1.29946	3.22021e-18	6.25956e-17	yes
Them6	968.667	110	72.6383	7.04133	-3.36681	5.85654e-74	1.15389e-72	yes	Dram1	20.6667	322.667	0.994667	13.422	3.75424	2.93462e-37	5.79156e-36	yes	Aox3	17.6667	154	0.449	3.96533	3.14265	3.31218e-18	6.43144e-17	yes
Omg	2607.67	409.667	156.855	20.9093	-2.90721	6.45146e-74	1.26972e-72	yes	Ppp1r9a	2067	616.333	32.218	9.148	-1.81634	3.14829e-37	6.20648e-36	yes	Epha8	23	162	0.563	4.00467	2.83048	3.32335e-18	6.44623e-17	yes
Kif4	20.3333	485	0.551667	11.1407	4.33589	8.49839e-74	1.67076e-72	yes	Stmn3	6812.33	1187.33	799.453	123.418	-2.69546	3.32477e-37	6.54727e-36	yes	Tmem132b	288.667	708.667	4.118	10.5673	1.3596	3.49321e-18	6.76847e-17	yes
Sgtb	1102	161.667	49.9823	6.367	-2.97273	1.06575e-73	2.09297e-72	yes	Tnfaip3	68.6667	509	2.09733	14.56	2.79538	3.4608e-37	6.80773e-36	yes	Bbox1	18.6667	153.667	0.549	7.76467	3.82205	3.58179e-18	6.93269e-17	yes
Fmnl3	278	1477.33	8.58133	38.532	2.16678	1.38942e-73	2.72564e-72	yes	Hck	69	631.667	4.43667	35.057	2.98215	4.13829e-37	8.13161e-36	yes	Nras	3149.33	1693.67	109.862	52.747	-1.05854	3.6506e-18	7.05835e-17	yes
Asah1	1033.33	3872	57.9007	190.109	1.71518	1.72908e-73	3.38828e-72	yes	Clvs2	415	49.3333	20.435	2.12867	-3.26302	4.34356e-37	8.52571e-36	yes	Txnrd1	3463	1683	134.169	65.1513	-1.04218	3.70295e-18	7.15194e-17	yes
Ndn	4064.33	837	147.382	25.8813	-2.50958	1.99772e-73	3.91047e-72	yes	Tspyl5	612	118.333	20.4863	3.45067	-2.56971	4.78565e-37	9.3833e-36	yes	Ajm1	66.3333	248.667	1.57467	6.00333	1.93072	3.74573e-18	7.22687e-17	yes
Sgsm1	1251.33	109.667	32.9803	3.092	-3.41499	2.15207e-73	4.20805e-72	yes	Gpr165	462.667	70.3333	11.0743	1.46833	-2.91497	5.31049e-37	1.04011e-35	yes	Hmga1	3409.33	1175	247.584	86.1863	-1.52239	3.7917e-18	7.30779e-17	yes
Maneal	935	100.333	46.044	4.198	-3.45524	2.29303e-73	4.47883e-72	yes	Nefl	30530.7	5396.67	1206.3	189.078	-2.67354	5.94138e-37	1.16242e-35	yes	Nrk	90.6667	440.333	1.333	6.44167	2.27276	4.10622e-18	7.89718e-17	yes
Reep2	1280.33	153	89.2997	9.133	-3.28949	2.55477e-73	4.98469e-72	yes	Gsdmd	40.3333	446	3.08833	29.944	3.27737	6.34847e-37	1.24073e-35	yes	Atp2b3	15.6667	132.333	0.407333	3.375	3.05061	4.19925e-18	8.06754e-17	yes
Agap2	1260.33	186.333	33.466	4.27967	-2.96713	2.98649e-73	5.82076e-72	yes	Wls	1088.33	4554.67	51.0237	190.9	1.90358	6.38889e-37	1.24728e-35	yes	Slc30a10	33.3333	177.667	0.673	3.616	2.42572	4.3618e-18	8.36212e-17	yes
Bex2	1372	144.667	203.482	18.2067	-3.48236	3.98802e-73	7.76441e-72	yes	P4ha3	141.667	687.667	8.136	34.1407	2.0691	6.66267e-37	1.29933e-35	yes	Kcnb1	131.333	460.667	1.43367	4.97467	1.79489	4.55114e-18	8.70748e-17	yes
Ppp1r1b	885.333	59	67.6567	3.59767	-4.2331	4.39522e-73	8.54799e-72	yes	Stra6l	2.33333	444.333	0.0893333	14.2513	7.31768	6.68244e-37	1.30178e-35	yes	Slc25a24	1251.33	503	41.981	17.2023	-1.28713	4.55155e-18	8.70748e-17	yes
1700017B05Rik	203.667	1330	7.87567	41.147	2.38531	5.75287e-73	1.11764e-71	yes	Was	39	382.667	2.50333	21.0963	3.07507	6.69808e-37	1.30343e-35	yes	Akap12	6431	2658	122.945	51.7277	-1.24901	4.98581e-18	9.52821e-17	yes
Galnt16	2648	365.333	90.3357	10.5633	-3.09623	5.85477e-73	1.13621e-71	yes	Galnt16	2648	874.333	90.3357	26.0687	-1.79298	7.97485e-37	1.55022e-35	yes	Brsk2	114.667	379.333	4.71633	14.0493	1.57476	5.02261e-18	9.58843e-17	yes
Tmod2	5033	1097.33	87.7733	15.418	-2.50917	6.17776e-73	1.19761e-71	yes	Cd5l	5.33333	2182.67	0.354	123.396	8.44533	8.29526e-37	1.61077e-35	yes	Robo2	175.333	586.667	3.29333	11.4743	1.80079	5.07053e-18	9.66973e-17	yes
St8sia1	1305.33	151.333	19.5873	2.31667	-3.0798	7.46155e-73	1.44494e-71	yes	Paqr9	1157	159.667	18.6053	2.26133	-3.04047	1.07198e-36	2.07934e-35	yes	Sox18	551	136.667	38.5147	9.80867	-1.97328	5.37919e-18	1.02476e-16	yes
Tmsb4x	9495.67	41532.7	1658.95	6156.08	1.89174	7.75951e-73	1.50103e-71	yes	Kctd12	1224	3717	27.176	72.1	1.40767	1.10745e-36	2.14584e-35	yes	Prim1	318.333	91.6667	22.9843	6.828	-1.75112	5.49301e-18	1.04534e-16	yes
Cacna1b	825	72	16.837	1.16167	-3.85737	7.83187e-73	1.51341e-71	yes	Id3	538	2132	56.5027	195.383	1.78992	1.11338e-36	2.15503e-35	yes	Calcoco1	496	1089.33	20.076	45.2117	1.17122	6.12127e-18	1.16368e-16	yes
Sox4	197.333	1205.67	5.56267	28.7327	2.36884	8.42156e-73	1.62562e-71	yes	Ccn2	379.667	2442.67	22.394	121.151	2.43563	1.11973e-36	2.16501e-35	yes	Baz1a	875	315	19.5483	6.862	-1.51034	6.70224e-18	1.27279e-16	yes
Dhrs3	305.667	2577.67	27.111	187.705	2.79152	9.7928e-73	1.8883e-71	yes	9930111J21Rik2	78	626	1.85067	13.398	2.8559	1.6375e-36	3.16275e-35	yes	L1cam	364	1035.33	9.051	25.388	1.488	6.72425e-18	1.27564e-16	yes
Id4	1402.33	179.667	49.05	5.31033	-3.20738	1.07777e-72	2.076e-71	yes	Ap3b2	2387	610	84.0167	18.8327	-2.15744	1.68689e-36	3.25468e-35	yes	Tmem8b	170.333	494	3.87067	11.9013	1.62047	6.74807e-18	1.27882e-16	yes
Zfp36l2	585.333	3197.67	22.3567	103.029	2.20427	1.20765e-72	2.32369e-71	yes	Tent5a	89.3333	575	2.167	12.1223	2.4839	1.71757e-36	3.31035e-35	yes	Ppp1r1a	133	517	11.583	46.6867	2.011	7.32698e-18	1.38563e-16	yes
Cacna1i	632.333	11.6667	11.0747	0.191667	-5.85252	1.23292e-72	2.3698e-71	yes	Rap1b	1165.67	4054.67	57.585	174.686	1.601	1.82198e-36	3.50785e-35	yes	Gabra3	109.667	336	3.50667	10.777	1.61978	7.94544e-18	1.49791e-16	yes
Rusc1	2143.33	325.333	91.0593	18.1157	-2.32957	1.34371e-72	2.58e-71	yes	Acsl3	4309.67	1427.67	204.115	56.6193	-1.85001	1.82723e-36	3.51422e-35	yes	Smim1	245	650.333	17.8187	52.9353	1.57084	8.13887e-18	1.53119e-16	yes
Dusp26	702.667	54.3333	49.906	3.63667	-3.77852	1.42929e-72	2.74143e-71	yes	Abca9	244	1140	5.17567	20.975	2.01885	1.96128e-36	3.76802e-35	yes	Dnajb2	573.667	1244	35.776	80.4777	1.1696	8.35112e-18	1.56949e-16	yes
Cbln1	526	24	37.4583	1.50767	-4.6349	1.74407e-72	3.34162e-71	yes	S1pr2	90.3333	771.333	1.90067	14.0913	2.89023	2.2748e-36	4.36574e-35	yes	Hecw1	22.6667	182.333	0.389667	3.07167	2.97871	8.86751e-18	1.66309e-16	yes
Aurka	34	530	2.43733	32.431	3.734	2.1091e-72	4.03674e-71	yes	Mfsd1	673	2492.67	30.0033	96.7783	1.68956	2.36623e-36	4.5364e-35	yes	Appl2	776.667	1508.67	41.729	89.4357	1.0998	8.98195e-18	1.68282e-16	yes
Hpcal4	1684.33	152.333	47.4433	3.49233	-3.76394	2.22477e-72	4.25364e-71	yes	Irag2	25.3333	384.667	1.71333	20.171	3.5574	2.45147e-36	4.69484e-35	yes	Rfc4	308	93.3333	28.846	8.98067	-1.68348	9.03631e-18	1.69125e-16	yes
Tk1	7.33333	600.333	0.692667	47.5353	6.1007	2.28584e-72	4.36578e-71	yes	Ccl3	7.33333	277.667	1.28433	42.898	5.06182	2.55325e-36	4.8846e-35	yes	Cldn11	5905.33	11684.3	361.727	730.859	1.01469	9.55501e-18	1.78649e-16	yes
Insig1	2444	423	121.164	17.9427	-2.7555	4.19016e-72	7.99446e-71	yes	Vcan	543	1883.67	10.125	27.0593	1.4182	2.60436e-36	4.97712e-35	yes	Opalin	264.333	774	16.5083	49.1537	1.5741	1.01832e-17	1.90199e-16	yes
Cdh5	400.333	4439.67	13.5437	126.944	3.2285	4.31648e-72	8.22678e-71	yes	Akap6	4463	991	44.3647	8.02333	-2.46714	2.70273e-36	5.15967e-35	yes	Gatd3a	415.667	932.333	34.3647	79.2477	1.20544	1.03005e-17	1.92192e-16	yes
Rtn3	22233.7	6267.67	1004.37	257.246	-1.96507	5.84327e-72	1.1125e-70	yes	Klf6	544.333	2005.33	17.3547	55.7847	1.68454	2.85065e-36	5.43634e-35	yes	Acp5	2884.33	1162.33	230.091	96.283	-1.25685	1.05552e-17	1.96741e-16	yes
Junb	144.333	1388.33	10.6727	87.158	3.02971	6.37639e-72	1.21272e-70	yes	Pla2g4e	365	42	10.8937	1.103	-3.30398	3.09178e-36	5.89e-35	yes	Dnmt1	2452.67	1084	52.6497	23.7533	-1.14829	1.06338e-17	1.98004e-16	yes
Lman1	573.667	2802	18.5357	85.7207	2.20934	8.36292e-72	1.58887e-70	yes	Cybrd1	75.6667	575.667	1.89267	12.65	2.74065	3.16004e-36	6.01371e-35	yes	Bdkrb2	339.667	113.667	10.2403	3.507	-1.54595	1.11248e-17	2.06933e-16	yes
Zdbf2	509.333	14.6667	6.06733	0.136333	-5.47585	9.56631e-72	1.81559e-70	yes	Rasa4	110.333	832	5.24967	34.897	2.73281	3.28074e-36	6.23685e-35	yes	Pvalb	42.3333	248	4.95267	29.7533	2.58677	1.15809e-17	2.15195e-16	yes
Ajm1	701.667	66.3333	19.9437	1.57467	-3.66281	9.71064e-72	1.84105e-70	yes	Ifi204	13	342	0.746	17.265	4.53253	3.53502e-36	6.71319e-35	yes	Edem1	4372.67	1992.67	86.091	39.969	-1.10698	1.15994e-17	2.15319e-16	yes
Cmklr1	63.3333	1159.67	3.48567	48.239	3.79069	9.89093e-72	1.87327e-70	yes	Arhgap9	48.6667	446	3.509	27.3213	2.9609	4.09047e-36	7.7599e-35	yes	Dact1	162	459	5.27267	15.1887	1.52639	1.17639e-17	2.18149e-16	yes
Pcdhac2	956.333	88	21.878	1.70867	-3.67854	1.03427e-71	1.95678e-70	yes	Gpx1	1389.33	4946.67	201.473	634.964	1.65609	4.26118e-36	8.0753e-35	yes	Tcf19	503.667	174.333	37.988	13.6827	-1.47319	1.18712e-17	2.19914e-16	yes
Ksr2	563.333	16	5.76	0.136333	-5.40086	1.16561e-71	2.20297e-70	yes	Kifap3	4269.33	1396.33	143.5	41.4023	-1.79327	4.40614e-36	8.34129e-35	yes	Gnptab	3384	1611.33	72.3773	35.0153	-1.04755	1.19794e-17	2.21691e-16	yes
Cd37	47.3333	640.667	4.82933	51.5203	3.41525	1.33202e-71	2.51484e-70	yes	Mast1	2180	325.667	63.05	7.95767	-2.98608	4.68197e-36	8.85421e-35	yes	Zic2	349.667	972	16.4153	46.4347	1.50016	1.35226e-17	2.49996e-16	yes
Bst1	6	648.333	0.286	27.6013	6.59258	1.37611e-71	2.59537e-70	yes	Tmem37	30	343.333	3.08267	30.58	3.31034	4.71081e-36	8.89944e-35	yes	Cacna2d3	44.3333	219	1.65967	8.073	2.28221	1.39673e-17	2.57692e-16	yes
Iglon5	1122.67	125.667	57.2127	5.50033	-3.37874	1.62954e-71	3.07016e-70	yes	Slitrk4	515.333	69.6667	11.862	1.38567	-3.0977	4.78466e-36	9.02954e-35	yes	Resp18	70.3333	383.333	10.601	60.4833	2.51234	1.40723e-17	2.59365e-16	yes
Grin2b	523	18	2.95833	0.0853333	-5.11553	1.63789e-71	3.08268e-70	yes	Slc35f3	442	64.3333	22.864	2.74167	-3.05995	5.30077e-36	9.99314e-35	yes	Hpgd	220	651.667	14.879	45.5237	1.61334	1.48187e-17	2.72845e-16	yes
Cdk2	50.3333	613.333	2.94333	30.4383	3.37037	1.72555e-71	3.24428e-70	yes	Wipf1	608.333	1958.33	18.4827	54.727	1.56608	5.50636e-36	1.03699e-34	yes	Aplp1	6119.67	12524	297.667	625.48	1.07126	1.49159e-17	2.74355e-16	yes
Rap2b	323.333	1742	6.384	29.288	2.19778	1.80208e-71	3.38466e-70	yes	Mt1	4382.33	13474.3	1069.21	2876.09	1.42757	5.8392e-36	1.09853e-34	yes	Syt11	3536.33	7045	97.0087	194.496	1.00355	1.66629e-17	3.06179e-16	yes
Gria1	1412.33	118	38.0153	3.32767	-3.514	2.07144e-71	3.88653e-70	yes	Notch2	485.667	2789.33	6.23967	30.9547	2.31062	6.12211e-36	1.15056e-34	yes	Eps8	1257	592	33.972	16.792	-1.01657	1.68332e-17	3.08994e-16	yes
Ids	6392.33	1742.33	178.127	40.4423	-2.13897	2.36121e-71	4.42562e-70	yes	Idh2	512.667	1702.33	39.6967	114.596	1.52946	6.57582e-36	1.23455e-34	yes	Zfr2	23.3333	143.667	0.801	6.09533	2.92783	1.78472e-17	3.27277e-16	yes
Pitpnm3	532	28.3333	10.9647	0.495	-4.46929	3.44211e-71	6.44486e-70	yes	Fam234b	1952.67	597	62.098	17.1103	-1.85968	6.68429e-36	1.25362e-34	yes	Adamts17	24.6667	167.667	0.547667	4.389	3.00252	1.83022e-17	3.35282e-16	yes
Niban2	1041.67	6010.67	37.6027	184.735	2.29655	4.64922e-71	8.69602e-70	yes	Igsf10	170	1020.33	2.28033	13.208	2.5341	7.04369e-36	1.31965e-34	yes	Ripk3	373.667	90.3333	24.7887	6.20233	-1.9988	1.83844e-17	3.36447e-16	yes
Milr1	11.6667	511	1.244	47.7237	5.26165	4.99617e-71	9.3353e-70	yes	Gucy1b1	1119	295	46.697	10.752	-2.11872	8.12187e-36	1.52008e-34	yes	Fmo1	248	662	16.052	41.8083	1.38104	1.85574e-17	3.39272e-16	yes
Snhg11	882	57.3333	20.4323	1.11833	-4.19143	5.20897e-71	9.72287e-70	yes	Mmp13	7	3192.67	0.351	141.489	8.655	9.47425e-36	1.77136e-34	yes	Porcn	100.333	313.667	6.21533	19.7783	1.67002	1.88306e-17	3.43919e-16	yes
B630019K06Rik	1152	107	59.6973	4.691	-3.6697	5.57857e-71	1.0402e-69	yes	Stt3a	844.667	2897.33	23.7237	60.058	1.34003	1.0055e-35	1.878e-34	yes	Pno1	1026.67	496.333	75.9687	37.649	-1.01279	1.98617e-17	3.62387e-16	yes
Eif4a1	3626.33	17191	303.331	1197.88	1.98152	5.64159e-71	1.05087e-69	yes	Plod3	577.333	2152	24.3747	84.787	1.79846	1.12512e-35	2.09925e-34	yes	Aldh4a1	467.333	1027	15.774	35.5147	1.17087	2.1e-17	3.82769e-16	yes
Kif23	9	520.333	0.427	21.2923	5.63995	8.72498e-71	1.62355e-69	yes	Cnn2	202.667	1149.67	11.1647	54.5807	2.28945	1.22905e-35	2.29081e-34	yes	S1pr3	851	2281.33	21.6227	59.8127	1.46791	2.14623e-17	3.90804e-16	yes
Slitrk4	515.333	20.3333	11.862	0.487667	-4.60431	9.89745e-71	1.83983e-69	yes	Rreb1	145	796.333	3.51867	16.0133	2.18617	1.31503e-35	2.44855e-34	yes	Snrpn	798	2018	47.2007	122.982	1.38157	2.16383e-17	3.93614e-16	yes
Clic1	385.667	5580	35.498	432.89	3.60819	1.22054e-70	2.26653e-69	yes	Tspan4	216.333	1202.67	23.445	108.055	2.20441	1.3813e-35	2.5693e-34	yes	Apod	30202	71143	2415.4	5889.93	1.28599	2.37975e-17	4.32456e-16	yes
Calb1	765.333	29.3333	24.623	0.780667	-4.97916	1.43447e-70	2.66105e-69	yes	Ptn	2004.33	6300	167.336	457.491	1.451	1.45864e-35	2.71037e-34	yes	Thbs1	18846.3	2449	372.386	48.749	-2.93335	2.42102e-17	4.39516e-16	yes
Litaf	1179.33	5649	72.0183	288.495	2.00211	1.5346e-70	2.84388e-69	yes	Itpripl2	235.667	1325	4.63233	22.6097	2.28713	1.94224e-35	3.60529e-34	yes	Snta1	284	715	15.2173	39.293	1.36856	2.47015e-17	4.4754e-16	yes
Pcx	1927	324.333	63.4707	9.23133	-2.78148	1.58098e-70	2.92684e-69	yes	Ripk1	116.667	750.333	3.89567	21.1353	2.43971	1.94568e-35	3.60586e-34	yes	Scarf2	309	795.667	10.6093	28.308	1.41588	2.47884e-17	4.48664e-16	yes
Ddx21	414	2197	11.8057	53.41	2.17763	1.78643e-70	3.30381e-69	yes	Nfya	225.667	921	9.43667	35.3593	1.90574	1.94653e-35	3.60586e-34	yes	Phyhip	36.6667	200	1.458	8.25033	2.50046	2.52373e-17	4.56334e-16	yes
Pf4	37.6667	1237.67	8.70433	236.908	4.76645	2.00139e-70	3.69756e-69	yes	Prkcb	2269	697.667	115.06	30.221	-1.92877	1.9706e-35	3.64623e-34	yes	Gabrb3	133	427.333	2.77333	9.044	1.70534	2.59182e-17	4.6818e-16	yes
Myd88	82.6667	772	5.655	44.9397	2.99039	2.08441e-70	3.84702e-69	yes	Cndp2	930	2920.33	58.979	159.605	1.43624	1.97235e-35	3.64623e-34	yes	Hr	305.333	742.667	6.32667	15.861	1.32597	2.66517e-17	4.8095e-16	yes
Kif1b	19865	5316.67	272.582	67.401	-2.01585	2.16814e-70	3.99747e-69	yes	Ccdc92	2502.33	506.333	150.247	24.784	-2.59986	1.98712e-35	3.66979e-34	yes	Tgm2	10351	3706.67	329.428	120.019	-1.4567	2.67756e-17	4.82707e-16	yes
Crlf1	14.6667	737.333	1.47	66.567	5.50092	2.35506e-70	4.33768e-69	yes	Mapk8ip3	8407	2632	220.153	57.7077	-1.93167	2.01282e-35	3.71347e-34	yes	Ppm1e	149.667	438.667	2.70333	8.15033	1.59212	2.70691e-17	4.87513e-16	yes
Fabp4	7.33333	919	1.105	115.823	6.71173	2.60433e-70	4.79192e-69	yes	Calu	1997.67	7010.67	89.3887	265.08	1.56826	2.0403e-35	3.76033e-34	yes	Dut	494.333	185.667	48.5777	18.1113	-1.4234	2.82898e-17	5.08992e-16	yes
Psd4	47.3333	586	2.006	18.6627	3.21776	2.77077e-70	5.09298e-69	yes	Milr1	11.6667	235.667	1.244	22.386	4.16954	2.37975e-35	4.3815e-34	yes	Ggta1	1938.67	902.333	65.2673	31.096	-1.06963	2.92092e-17	5.25014e-16	yes
Adcy8	686.667	54	13.1657	0.887667	-3.89062	2.91622e-70	5.35489e-69	yes	Rcan2	4853.67	1421.67	208.99	54.5453	-1.93791	2.54318e-35	4.67764e-34	yes	D7Ertd443e	19.3333	130.333	1.23667	6.654	2.42777	2.99538e-17	5.37331e-16	yes
Baiap3	784.333	22.6667	24.0247	0.643667	-5.22206	4.49743e-70	8.25e-69	yes	Plxdc2	1041	2907	30.6813	94.5693	1.62401	2.54628e-35	4.6786e-34	yes	Fbxo5	176.333	37.3333	10.3577	2.25033	-2.20249	3.10395e-17	5.56257e-16	yes
Prkcz	2813	522.667	108.989	17.624	-2.62856	5.42792e-70	9.94678e-69	yes	Cpq	597	2434.67	41.7193	148.581	1.83246	2.77397e-35	5.0918e-34	yes	Rnh1	4864.67	2213	308.61	146.995	-1.07001	3.14051e-17	5.62254e-16	yes
Arhgap11a	116.333	801.333	3.19	18.901	2.56683	5.95924e-70	1.09094e-68	yes	Lrrk1	183.667	1425.67	3.332	22.219	2.73733	2.9562e-35	5.4208e-34	yes	Spag5	447.667	177.333	13.1857	5.346	-1.30244	3.18231e-17	5.69175e-16	yes
Ccdc136	1298.67	190.667	100.869	8.29167	-3.60468	6.77665e-70	1.23933e-68	yes	Spock2	18646.7	4325.67	477.999	97.4657	-2.29404	3.07539e-35	5.63365e-34	yes	Gbp10	26.3333	239	0.856333	7.794	3.18612	3.37949e-17	6.03252e-16	yes
Baalc	2732.33	353.667	142.782	15.8423	-3.17195	8.48457e-70	1.55011e-68	yes	Begain	903	176.333	46.711	7.717	-2.59765	3.13041e-35	5.72865e-34	yes	Cd300ld	270	47.6667	11.6447	2.13633	-2.44646	3.50188e-17	6.24485e-16	yes
Ikbke	17	494.667	0.702333	17.6187	4.64881	1.11803e-69	2.04055e-68	yes	Pgr	329	30.6667	6.41267	0.586	-3.45195	3.28617e-35	6.00762e-34	yes	Agmo	156	420.667	7.49267	20.423	1.44664	3.72169e-17	6.63031e-16	yes
Elfn2	1214.33	184.333	22.276	2.889	-2.94685	1.32705e-69	2.41959e-68	yes	Dhcr24	4969.67	967	166.276	28.322	-2.55358	3.5004e-35	6.39282e-34	yes	Capza1	5224.33	2519.33	190.623	94.685	-1.00951	4.00297e-17	7.12443e-16	yes
Tubg2	580.667	32.3333	44.3977	2.125	-4.38495	1.40966e-69	2.56763e-68	yes	Syndig1	820.667	153.333	58.8943	9.27633	-2.6665	3.62458e-35	6.61294e-34	yes	Nr3c2	98	345.667	1.96	7.27667	1.89242	4.08412e-17	7.26173e-16	yes
Slfn5	188.333	1434	4.903	33.5077	2.77275	1.57345e-69	2.86309e-68	yes	Nab2	181.667	926.333	10.8467	44.075	2.02271	3.72439e-35	6.78821e-34	yes	Sema3c	449.333	1129.33	9.37733	24.1913	1.36724	4.33724e-17	7.68918e-16	yes
Map1b	32739.7	5275.67	373.129	52.443	-2.83085	1.69189e-69	3.0755e-68	yes	Il7r	17	387.333	0.643667	12.8027	4.31399	4.01186e-35	7.3048e-34	yes	Klf15	53.3333	230.333	2.737	11.562	2.07872	4.45533e-17	7.8908e-16	yes
Nrip2	578	25.3333	44.181	1.71667	-4.68574	2.03909e-69	3.70292e-68	yes	C1s2	5.66667	262	0.295667	11.4603	5.27653	4.21307e-35	7.66347e-34	yes	Lpin1	279.333	638.333	7.136	16.33	1.19434	4.47271e-17	7.91386e-16	yes
Gabrg1	714.333	60.6667	22.2303	1.57433	-3.81972	2.62269e-69	4.75794e-68	yes	Kcnc4	1061	170	39.3053	5.522	-2.83146	4.22444e-35	7.67644e-34	yes	Arnt2	1481	3263	29.2897	64.8393	1.14648	4.55899e-17	8.05866e-16	yes
Cx3cl1	2943.67	516	121.23	18.023	-2.74984	2.69658e-69	4.88707e-68	yes	Mcm6	92.3333	547	4.23133	21.6383	2.35441	4.40528e-35	7.99704e-34	yes	Ddias	152.667	24.6667	5.67167	0.860667	-2.72025	4.56938e-17	8.06917e-16	yes
Pgm2l1	2055.67	425	34.349	7.18567	-2.25707	2.82626e-69	5.11697e-68	yes	Il2rg	32.3333	412.667	2.61333	30.0203	3.52198	4.47595e-35	8.11719e-34	yes	Medag	1329.33	567.667	52.2143	22.9577	-1.18547	4.64218e-17	8.18974e-16	yes
Hacd4	128.333	1501	3.768	36.985	3.29507	3.14795e-69	5.6937e-68	yes	Rack1	3010	9790.33	278.684	790.703	1.5045	4.86575e-35	8.81528e-34	yes	Panx2	24	157.667	0.817333	6.303	2.94704	4.76504e-17	8.39832e-16	yes
Nfya	225.667	1287.33	9.43667	50.976	2.43347	3.40379e-69	6.15028e-68	yes	Rims3	2593.33	426.333	53.8527	7.87367	-2.77391	4.94326e-35	8.94676e-34	yes	Dusp6	2404.33	1099	98.025	45.891	-1.09494	4.85039e-17	8.54045e-16	yes
Ppargc1a	737.667	58.3333	19.3713	1.316	-3.87969	3.66577e-69	6.61704e-68	yes	Ehbp1l1	184.333	952.667	7.491	31.4383	2.06929	4.95353e-35	8.9564e-34	yes	Cnn1	178.667	35.6667	13.1317	3.43233	-1.93579	5.32151e-17	9.3609e-16	yes
Syt11	13865	3536.33	444.007	97.0087	-2.1944	3.91087e-69	7.05243e-68	yes	Rab6b	10079.3	2097.67	272.122	49.6237	-2.45515	5.01602e-35	9.06035e-34	yes	Apba1	555	1403	9.594	25.1047	1.38775	5.3861e-17	9.46533e-16	yes
Renbp	93	992.667	9.062	81.1133	3.16204	4.03652e-69	7.27176e-68	yes	Il21r	24.6667	311.333	1.392	15.1903	3.44792	5.21556e-35	9.41138e-34	yes	Saa3	150	1591.67	30.8453	335.69	3.444	5.70406e-17	1.00144e-15	yes
Arhgdig	618.667	46	80.2997	5.07667	-3.98344	4.10541e-69	7.3885e-68	yes	Limk1	3502.67	1006.67	141.65	37.652	-1.91154	5.44832e-35	9.82162e-34	yes	Slc1a4	379	998	11.01	30.0603	1.44905	6.17596e-17	1.08324e-15	yes
Gls2	619.667	26.6667	38.1473	2.10767	-4.17786	4.90947e-69	8.82679e-68	yes	Sned1	320.333	2192	4.86367	28.1803	2.53457	5.87921e-35	1.05878e-33	yes	Kif19a	143.667	431	5.308	17.599	1.72925	6.22125e-17	1.09013e-15	yes
Msmo1	3128.67	813.667	211.245	45.7997	-2.20551	5.54077e-69	9.95192e-68	yes	Kctd9	1365.33	346	80.1097	15.1427	-2.40336	5.94115e-35	1.06888e-33	yes	Hat1	785.667	353.667	56.7333	26.2457	-1.11212	6.45458e-17	1.12971e-15	yes
Pja2	8576.67	2067.67	254.154	51.6093	-2.3	5.75281e-69	1.03225e-67	yes	Hspb1	515	2490	76.9203	322.626	2.06843	5.98183e-35	1.07513e-33	yes	Pltp	3114	9624	199.812	631.839	1.66092	6.45955e-17	1.12971e-15	yes
Npl	127.667	1830.67	9.817	119.157	3.60144	5.77429e-69	1.03508e-67	yes	Pdpn	169	1466	12.54	96.1887	2.93933	6.15693e-35	1.1055e-33	yes	Neu4	53.6667	305.667	1.72467	9.145	2.40667	6.52495e-17	1.13963e-15	yes
Clec2l	613	39.3333	57.217	3.13067	-4.1919	6.04128e-69	1.08187e-67	yes	Parp9	89	687.667	3.91467	26.5673	2.76269	6.39771e-35	1.1476e-33	yes	Kif20b	217	50	5.984	1.816	-1.72035	6.52886e-17	1.13963e-15	yes
Kif22	29.3333	544	2.041	29.3317	3.84511	6.16406e-69	1.10276e-67	yes	Antxr1	614.667	2855	16.1293	64.9453	2.00954	6.65141e-35	1.19192e-33	yes	Epha2	280.667	82.3333	8.172	2.467	-1.72793	6.59659e-17	1.15034e-15	yes
Trib1	137.333	1261	4.31533	33.2533	2.94596	6.20625e-69	1.10921e-67	yes	Syt7	2142.67	386.667	68.4823	10.307	-2.73211	6.82262e-35	1.2214e-33	yes	Eif4ebp1	635.667	268	36.269	15.7567	-1.20277	6.63209e-17	1.15542e-15	yes
Hvcn1	60.3333	1066.33	3.262	45.1607	3.79124	6.51461e-69	1.16318e-67	yes	Col9a3	215	931.667	10.116	38.195	1.91674	6.91759e-35	1.23718e-33	yes	Kcnh2	107	316	3.37033	10.6497	1.65985	6.79466e-17	1.18261e-15	yes
Grid1	714.667	67	16.7587	1.33	-3.65541	7.23983e-69	1.29139e-67	yes	Nfkbia	187	779.667	15.9563	57.8103	1.8572	6.98263e-35	1.24758e-33	yes	Pcsk2	77.3333	360	1.85167	8.99067	2.2796	6.83648e-17	1.18875e-15	yes
Zranb3	67	1137.33	2.11033	30.5193	3.85418	7.33118e-69	1.3064e-67	yes	Sec24d	277	1362.67	9.57133	40.7707	2.09074	7.45277e-35	1.33027e-33	yes	Cspg5	479	1416.33	23.774	73.1133	1.62075	6.94253e-17	1.20603e-15	yes
Dab2	406.333	5483.33	15.5347	195.596	3.65432	8.05674e-69	1.43427e-67	yes	Glra3	304	29.6667	6.322	0.537	-3.55739	8.03151e-35	1.43215e-33	yes	Chadl	63.3333	257.667	3.06567	12.7453	2.0557	7.34652e-17	1.27499e-15	yes
Fgr	26.3333	527.333	1.15567	20.881	4.17539	8.40163e-69	1.4942e-67	yes	Mcf2l	1563.67	360	53.6897	11.8517	-2.17955	8.60428e-35	1.53278e-33	yes	Slc7a8	2751.67	1279.33	76.7237	36.617	-1.06716	7.56862e-17	1.31228e-15	yes
Gba1	642.333	3217	48.1887	204.907	2.0882	9.28184e-69	1.64912e-67	yes	Fuca1	845	2936.33	44.868	135.976	1.5996	9.84833e-35	1.75267e-33	yes	Ypel3	546	1328	64.206	161.76	1.33307	7.97178e-17	1.38086e-15	yes
Dennd4c	304.333	1723.67	5.40033	25.8653	2.2599	1.00951e-68	1.79186e-67	yes	St8sia3	1236.33	219.667	19.4487	3.39	-2.52031	9.91901e-35	1.76352e-33	yes	Set	4179.67	2299.33	231.424	114.546	-1.01461	8.11693e-17	1.40466e-15	yes
Cacna1e	945.667	63.6667	11.3383	0.618667	-4.1959	1.03231e-68	1.83052e-67	yes	Pcdh11x	389.667	61.3333	6.67	0.978333	-2.76929	1.12782e-34	2.0032e-33	yes	Ppp2r2b	123	433.333	6.753	23.6073	1.80563	8.78672e-17	1.51912e-15	yes
Strbp	1454.67	266	37.8007	8.893	-2.08767	1.06123e-68	1.87997e-67	yes	Slc4a8	2376.33	734.333	27.7597	9.87633	-1.49094	1.1605e-34	2.05924e-33	yes	Slc4a3	194	485.333	5.28533	14.1533	1.42108	8.93255e-17	1.5414e-15	yes
Hnrnpab	2003	7995.33	142.945	504.049	1.8181	1.38037e-68	2.44294e-67	yes	Slc2a3	1451.33	408.333	53.149	12.6553	-2.0703	1.28722e-34	2.28186e-33	yes	C1qa	10302.7	22633.7	1130.52	2538.91	1.16723	8.94143e-17	1.54146e-15	yes
Fry	2147	504.667	40.453	10.4013	-1.95948	1.52304e-68	2.69279e-67	yes	Slc1a1	1416.33	451	50.176	13.9237	-1.84946	1.3864e-34	2.45527e-33	yes	Bace2	625	1259	20.6163	48.367	1.23024	9.62685e-17	1.65648e-15	yes
Epha10	492.667	26.6667	15.2477	0.681	-4.48479	1.96756e-68	3.47533e-67	yes	Afap1l2	283.667	1354.67	10.7497	44.785	2.05872	1.40888e-34	2.49265e-33	yes	Timp4	437.667	1101.33	17.352	41.8973	1.27176	9.75466e-17	1.67688e-15	yes
Ppfibp1	414	2155.33	15.8433	71.7897	2.1799	2.02575e-68	3.57461e-67	yes	H6pd	161.667	1167.33	4.82633	29.8633	2.62938	1.52558e-34	2.69648e-33	yes	Ccl19	31	175.667	4.75567	27.629	2.53846	9.96286e-17	1.71105e-15	yes
Cntfr	1029.33	126	70.7553	7.43567	-3.2503	2.14277e-68	3.77742e-67	yes	Gpr183	37	361	2.70267	15.601	2.52918	1.62471e-34	2.86889e-33	yes	Scn7a	320.333	1178.33	5.02633	19.0093	1.91913	1.03075e-16	1.76856e-15	yes
Plekho2	501.667	2496.33	20.565	86.9203	2.0795	2.24317e-68	3.95056e-67	yes	Zfyve9	2462.33	789.667	69.4757	20.7487	-1.74349	1.66142e-34	2.93087e-33	yes	Pth1r	179.667	478	9.88033	25.179	1.34959	1.09541e-16	1.87774e-15	yes
Septin5	3006.33	741.333	217.408	44.8017	-2.27878	2.44253e-68	4.29748e-67	yes	Bnip2	372	1377	24.6227	75.986	1.62575	1.70488e-34	3.00461e-33	yes	AI593442	57.6667	221.667	1.17033	4.63033	1.9842	1.11262e-16	1.90454e-15	yes
Loxl3	64	705.667	2.107	19.714	3.22596	2.54132e-68	4.46695e-67	yes	Trem6l	8.66667	237.333	0.438	8.27867	4.2404	1.74284e-34	3.06852e-33	yes	Chil3	1365.67	95.6667	101.992	7.22633	-3.81904	1.11315e-16	1.90454e-15	yes
Slc31a1	476.667	1918.33	17.2053	58.99	1.77761	2.83697e-68	4.98178e-67	yes	Rims2	881	217.333	31.5553	6.69533	-2.23666	1.78242e-34	3.13516e-33	yes	Cd53	7001.33	3331.67	459.074	224.01	-1.03516	1.41833e-16	2.42211e-15	yes
Esm1	33	689.333	2.12533	37.515	4.14171	3.27542e-68	5.74613e-67	yes	Uhmk1	6239.67	2267.33	108.105	34.4067	-1.65167	1.86308e-34	3.27385e-33	yes	Mthfd1l	662.333	293.333	20.797	9.452	-1.13768	1.55057e-16	2.64544e-15	yes
Plekhm1	412.333	2072	10.185	43.1057	2.08143	3.3428e-68	5.85864e-67	yes	Abtb3	859	218.333	26.562	5.813	-2.19201	1.88449e-34	3.30826e-33	yes	Ccdc3	422	962.333	18.0647	42.0967	1.22054	1.57749e-16	2.68885e-15	yes
Adgrl1	3762.33	857.667	68.3147	13.174	-2.3745	3.40072e-68	5.95438e-67	yes	Fabp5	2732	9382.67	369.699	1111.45	1.58801	1.95999e-34	3.43748e-33	yes	Ormdl3	562.333	1165	29.4003	62.526	1.08862	1.59406e-16	2.71455e-15	yes
Ccn4	40.3333	644.667	1.06833	14.64	3.77648	3.4232e-68	5.98795e-67	yes	Tsku	44.6667	369	2.54667	18.2053	2.83768	2.02742e-34	3.5523e-33	yes	Pkn3	180.333	37	7.54167	1.62933	-2.2106	1.66539e-16	2.83334e-15	yes
Osbpl6	1386.67	159.667	24.2193	3.04233	-2.99291	3.5724e-68	6.2429e-67	yes	Tln1	1905	8527.67	30.509	118.709	1.96012	2.17847e-34	3.81327e-33	yes	Shh	182.333	29.6667	7.408	1.22967	-2.59082	1.69599e-16	2.88271e-15	yes
Kcnip4	701.333	29	41.4497	1.511	-4.77778	5.22184e-68	9.11654e-67	yes	Magee1	2760.33	841	104.147	27.814	-1.90474	2.7192e-34	4.7552e-33	yes	Qdpr	1774.67	3643	148.807	312.914	1.07232	1.71936e-16	2.91968e-15	yes
Pecam1	484.333	2699	20.4173	93.711	2.19842	5.26865e-68	9.1894e-67	yes	Sult4a1	6986.67	1220	392.928	60.8073	-2.69195	2.74063e-34	4.78804e-33	yes	Kcnd2	40.3333	193.333	0.883	4.40733	2.31942	1.72901e-16	2.93333e-15	yes
Ninj1	315.667	2455.67	36.22	236.082	2.70443	6.89981e-68	1.20228e-66	yes	Npnt	124.333	612.667	3.94467	16.9623	2.10436	2.93551e-34	5.11945e-33	yes	Lif	138	22.6667	4.013	0.678667	-2.56391	1.79536e-16	3.04304e-15	yes
Angptl4	74	1389.67	4.44067	71.7883	4.0149	8.93591e-68	1.55557e-66	yes	Ada	21.3333	342.667	1.699	23.6217	3.79735	2.93598e-34	5.11945e-33	yes	Cd38	2181.33	849.667	76.263	30.4597	-1.32408	1.85683e-16	3.1443e-15	yes
Rbl1	58.6667	601.333	1.62467	14.193	3.12696	9.56631e-68	1.66371e-66	yes	Apba2	1599.33	470.667	84.1303	21.1337	-1.99308	3.01457e-34	5.25143e-33	yes	Ndnf	164.333	571.667	1.84033	6.64633	1.85259	1.90412e-16	3.22137e-15	yes
Ldha	2556.33	15965	216.442	1152.24	2.41239	1.01924e-67	1.7709e-66	yes	Sh2d5	364	51.6667	13.9233	1.718	-3.0187	3.11403e-34	5.41949e-33	yes	Trem6l	684	237.333	21.0003	8.27867	-1.34294	1.924e-16	3.25197e-15	yes
Septin2	1919.67	6582.67	81.668	236.018	1.53105	1.19267e-67	2.07023e-66	yes	Serpina3i	14.6667	316	0.892	16.744	4.23046	3.35604e-34	5.83507e-33	yes	Tgfb2	227	680	5.54767	16.3127	1.55604	1.93531e-16	3.26804e-15	yes
Tlr8	5.66667	628	0.341	25.5973	6.23008	1.19449e-67	2.0714e-66	yes	Gng5	510.667	1753.33	114.376	342.893	1.58397	3.38097e-34	5.87278e-33	yes	Sgpp2	22	197	0.634	5.84833	3.20547	2.24405e-16	3.78234e-15	yes
Reep1	2636.67	506.333	90.777	14.8133	-2.61543	1.22111e-67	2.11554e-66	yes	Epb41l3	9127	2653.33	386.626	97.165	-1.99243	3.42029e-34	5.93539e-33	yes	Magi2	255.667	620.333	5.40967	14.303	1.40271	2.26957e-16	3.82181e-15	yes
Rnf149	384	1954.33	21.7167	95.2157	2.1324	1.55981e-67	2.69974e-66	yes	Itm2a	1677	6530	129.424	438.062	1.75903	4.07997e-34	7.07338e-33	yes	Slc7a14	191.667	537.667	2.51633	7.168	1.51025	2.34019e-16	3.92978e-15	yes
Adgrb3	841	109.667	24.7133	2.42533	-3.34903	1.71361e-67	2.9631e-66	yes	Apln	1169	268.667	49.6967	10.0257	-2.30945	4.09013e-34	7.08421e-33	yes	Mfap3l	575.333	1503.67	10.5657	28.1677	1.41466	2.65029e-16	4.4464e-15	yes
Elavl3	2523.67	676.667	69.6847	15.7383	-2.14656	1.85013e-67	3.19611e-66	yes	Gria2	1533.67	271.667	33.4973	4.89933	-2.77339	4.13263e-34	7.15099e-33	yes	Fyn	1517	2662	63.2403	131.83	1.05976	2.84624e-16	4.77074e-15	yes
Bach1	286.667	1401.33	6.57633	27.3123	2.0542	2.42565e-67	4.18633e-66	yes	Pofut2	329	1281.33	19.47	66.4133	1.77022	4.15102e-34	7.17595e-33	yes	Cxcl10	48	280.667	5.03	29.618	2.55784	2.98807e-16	4.99922e-15	yes
Asic2	818.333	57.3333	36.971	2.165	-4.09396	2.50275e-67	4.31527e-66	yes	Vasn	178	969.333	8.45833	40.0913	2.24485	4.23292e-34	7.31057e-33	yes	Rgs16	1018	359	49.3433	17.9877	-1.45585	3.19424e-16	5.33797e-15	yes
Slc16a10	33.3333	651.667	1.401	15.0197	3.42232	2.75237e-67	4.74115e-66	yes	Pax2	280.333	18.6667	11.4393	0.766667	-3.89926	4.27033e-34	7.36814e-33	yes	Tmem132c	46.6667	191	1.20333	4.36033	1.8574	3.19642e-16	5.33797e-15	yes
Dbf4	19.6667	456	1.09567	21.6797	4.30646	3.31712e-67	5.70855e-66	yes	Rasd2	354.667	52	16.96	2.166	-2.96903	4.39155e-34	7.5701e-33	yes	Pgap4	192.667	529.667	8.978	27.6473	1.62267	3.28285e-16	5.47726e-15	yes
Necab1	788	45.6667	21.7173	1.06967	-4.34361	3.6514e-67	6.27784e-66	yes	Cd9	2194.33	10939.7	240.468	1044.68	2.11915	5.81859e-34	1.00205e-32	yes	Clip4	246.667	572.333	11.1143	27.2353	1.29306	3.34372e-16	5.56881e-15	yes
Smpdl3a	647.667	3290	44.2363	191.054	2.11068	3.658e-67	6.28321e-66	yes	Ccdc85c	1489.33	327.667	46.7577	9.15567	-2.35247	6.04131e-34	1.03941e-32	yes	Erg	318.333	111.667	15.024	5.113	-1.55503	3.34386e-16	5.56881e-15	yes
Arxes2	1500.33	248.333	131.098	18.493	-2.82559	4.25774e-67	7.30643e-66	yes	Glb1	356.667	1317	19.7977	64.1313	1.6957	6.0496e-34	1.03985e-32	yes	Atp8b4	328	67.3333	7.666	1.46733	-2.38528	3.47158e-16	5.77091e-15	yes
Mtus2	542.667	26.6667	14.549	0.821333	-4.14681	4.40853e-67	7.55802e-66	yes	Rhbdf1	145.667	751.667	7.14433	29.7847	2.0597	6.4892e-34	1.11436e-32	yes	Adhfe1	45	182	2.58333	9.96933	1.94826	4.15831e-16	6.90614e-15	yes
Wif1	12	491	0.731667	24.6373	5.07352	4.42047e-67	7.57131e-66	yes	Mdk	320	1524.67	55.2633	229.996	2.05721	6.59422e-34	1.13132e-32	yes	Pram1	180	31.3333	9.051	1.59667	-2.50301	4.32643e-16	7.17879e-15	yes
Btg1	448	2537.33	13.0647	65.1693	2.31852	5.39974e-67	9.23984e-66	yes	Pak1	5521.33	1879.33	245.701	74.591	-1.71983	6.8366e-34	1.17179e-32	yes	Usp53	411.667	944.667	7.75	18.1207	1.22537	4.37569e-16	7.25389e-15	yes
Abcb9	808	101.667	29.7617	3.16167	-3.2347	5.85025e-67	1.00013e-65	yes	Tspo	136.667	928.333	21.9527	129.145	2.55652	6.94062e-34	1.1885e-32	yes	Podn	92.3333	350.333	3.409	13.29	1.96292	4.43767e-16	7.34992e-15	yes
Gpc5	602.333	9.66667	28.564	0.427667	-6.06157	5.86649e-67	1.00196e-65	yes	Gpc3	280.333	2231.33	17.3103	119.635	2.78893	7.78726e-34	1.33222e-32	yes	Rab3c	51.6667	252	0.799333	4.088	2.35453	4.47629e-16	7.40711e-15	yes
Rimbp2	463.667	25.3333	16.0813	1.64733	-3.28718	5.95521e-67	1.01615e-65	yes	Thsd4	250.333	2070.33	4.50367	30.9263	2.77966	7.82529e-34	1.33746e-32	yes	Dynll2	1838.33	4146	85.309	196.682	1.2051	4.90121e-16	8.09547e-15	yes
Nebl	2064.33	521.333	48.959	10.526	-2.21762	6.0554e-67	1.03227e-65	yes	Lpp	201.667	1086.67	1.83033	8.23033	2.16884	8.0741e-34	1.37869e-32	yes	Kcnj13	20.6667	125.333	1.85833	11.588	2.64055	5.08917e-16	8.39829e-15	yes
Frrs1l	1840.67	109.333	38.1673	1.938	-4.2997	6.10252e-67	1.03932e-65	yes	Mtmr7	668	155	36.1153	7.33367	-2.3	9.92157e-34	1.69255e-32	yes	Ticrr	161	26	2.566	0.437	-2.55382	5.20051e-16	8.56644e-15	yes
Col7a1	12	527.667	0.177667	6.501	5.19342	6.27505e-67	1.0677e-65	yes	Tnfaip2	40	1855.67	1.76067	62.2123	5.14301	9.94471e-34	1.6949e-32	yes	Cdca7	285.667	90	13.527	4.34967	-1.63687	5.21797e-16	8.58739e-15	yes
Lyz2	1789.33	147788	185.333	12674.3	6.09564	7.37185e-67	1.25315e-65	yes	H2-DMb1	30	389.667	2.83233	32.41	3.51638	1.05179e-33	1.7909e-32	yes	Ckb	7138	14630	551.736	1163.76	1.07674	5.45851e-16	8.97512e-15	yes
Pvr	45	643.667	2.117	25.244	3.57585	8.08482e-67	1.37305e-65	yes	Fli1	78.3333	531	3.483	18.8453	2.4358	1.05693e-33	1.79797e-32	yes	Pif1	104.667	11.3333	3.37033	0.370333	-3.18599	5.67267e-16	9.30194e-15	yes
Sash3	51.3333	688.333	2.55567	29.2243	3.5154	8.26619e-67	1.40254e-65	yes	Ltbp4	749.333	3308	19.7773	78.8067	1.99447	1.06442e-33	1.80902e-32	yes	Nap1l2	79	285.333	3.65933	13.6557	1.89985	5.71802e-16	9.36783e-15	yes
Sdcbp	3343	14183.3	215.922	777.606	1.84853	1.0003e-66	1.69564e-65	yes	Oaf	84.6667	551	6.637	37.0533	2.481	1.12995e-33	1.91858e-32	yes	Igf2r	3341.67	1442.33	42.964	18.9307	-1.1824	6.30023e-16	1.03031e-14	yes
Gng4	597	50	25.362	1.79867	-3.81767	1.29357e-66	2.1907e-65	yes	Pex5l	3551.67	1185.67	156.169	45.4547	-1.78061	1.20039e-33	2.03628e-32	yes	Crebl2	196.667	501	7.056	17.0703	1.27457	6.32016e-16	1.03189e-14	yes
Nmnat2	2092.67	333.333	61.3537	8.20167	-2.90316	1.55346e-66	2.62838e-65	yes	Sez6l2	9349	2504.33	372.776	87.1683	-2.09643	1.21493e-33	2.05901e-32	yes	Adgra1	157.667	414.333	3.776	10.2	1.43364	6.50179e-16	1.05945e-14	yes
Ssr3	2537.67	8688.67	116.257	339.105	1.54441	1.60194e-66	2.70788e-65	yes	Pja2	8576.67	2761.67	254.154	71.5867	-1.82794	1.26883e-33	2.14836e-32	yes	Phf19	198	48.6667	6.39233	1.525	-2.06753	6.77448e-16	1.10289e-14	yes
Rreb1	145	900.667	3.51867	17.2333	2.2921	2.0894e-66	3.52856e-65	yes	Amdhd2	92.6667	580.333	8.295	45.281	2.44859	1.27597e-33	2.15843e-32	yes	Nup107	560.333	222	20.69	8.375	-1.30477	6.9365e-16	1.12825e-14	yes
Tmed2	2225	7755.67	168.809	515.162	1.60964	2.0986e-66	3.5408e-65	yes	Gfap	41712.7	120685	2125.95	5345.09	1.33011	1.3016e-33	2.19973e-32	yes	St8sia3	45.6667	219.667	0.689	3.39	2.29871	7.07371e-16	1.14954e-14	yes
Kcnk3	465	24.6667	16.383	0.737667	-4.47309	2.16201e-66	3.64439e-65	yes	Dcc	341.333	47.6667	4.46333	0.541	-3.04442	1.30672e-33	2.20633e-32	yes	Cd163	212.667	49.3333	5.564	1.31133	-2.08509	8.20351e-16	1.33076e-14	yes
Tspan4	216.333	2261.67	23.445	188.845	3.00985	2.16796e-66	3.65101e-65	yes	Hs3st4	299.333	32.3333	12.7237	1.18967	-3.41889	1.77592e-33	2.99575e-32	yes	Ryr2	40	194	0.507	2.87567	2.50384	8.28729e-16	1.34315e-14	yes
Crtap	144.667	1378.33	11.6633	93.83	3.00807	2.54261e-66	4.27797e-65	yes	Sv2b	2377	392.667	59.9713	8.626	-2.79751	1.8011e-33	3.0354e-32	yes	Rad51ap1	165.667	28	10.39	1.89433	-2.45543	8.37048e-16	1.35542e-14	yes
Chodl	444.333	12.6667	23.62	0.696667	-5.0834	3.04601e-66	5.12018e-65	yes	Mtfp1	541.333	113	51.4687	9.4	-2.45296	1.82392e-33	3.07101e-32	yes	Ggact	169	470	19.7553	57.7883	1.54854	8.43942e-16	1.36536e-14	yes
Hipk4	537.667	15.3333	24.5857	0.631667	-5.28251	3.22845e-66	5.42181e-65	yes	Sacs	1710.67	386.333	16.0163	3.12467	-2.35777	1.83643e-33	3.08919e-32	yes	Gabarapl1	1688	3415.33	121.679	254.655	1.06546	8.47174e-16	1.36815e-14	yes
Ppic	88.6667	1851.67	8.49267	150.778	4.15006	3.50233e-66	5.87632e-65	yes	Pitpnm3	532	108.667	10.9647	1.94867	-2.4923	1.95228e-33	3.28102e-32	yes	Wif1	491	141.667	24.6373	7.19133	-1.77651	9.30104e-16	1.49808e-14	yes
Sec61b	213	1254.67	50.7227	253.493	2.32124	3.61171e-66	6.05421e-65	yes	Ank3	7704.33	2700.67	209.756	63.307	-1.72828	2.01552e-33	3.38417e-32	yes	Emp2	997	2011.67	33.0533	68.465	1.05057	9.67428e-16	1.55681e-14	yes
Tram2	48.3333	950	1.009	16.7463	4.05285	3.62315e-66	6.06776e-65	yes	Ccdc92b	430	78.3333	14.4673	2.301	-2.65247	2.1871e-33	3.66885e-32	yes	Oit3	108	11.3333	4.53267	0.489	-3.21245	9.90215e-16	1.59207e-14	yes
Vsir	688.667	3531.67	24.9983	116.142	2.21598	4.11671e-66	6.88797e-65	yes	Cebpb	50.6667	366.333	4.53733	28.531	2.65261	2.2605e-33	3.78848e-32	yes	Eif1a	2368.33	1063	110.835	50.9143	-1.12227	9.99623e-16	1.60577e-14	yes
Plcb2	47.3333	579	1.28867	13.4547	3.38416	4.46062e-66	7.45648e-65	yes	Srebf1	1057	3344.67	37.7513	100.67	1.41504	2.39525e-33	4.01061e-32	yes	Postn	1721	3962.67	79.2123	175.467	1.1474	1.01205e-15	1.62429e-14	yes
Pnck	802	47.3333	71.7803	3.572	-4.32878	4.88789e-66	8.16319e-65	yes	Cck	322.333	29.3333	64.0323	4.974	-3.68632	2.50318e-33	4.18746e-32	yes	Egfl8	303.333	684	30.3543	69.7783	1.20088	1.02835e-15	1.64899e-14	yes
Prrt3	524	12.3333	20.6423	0.407333	-5.66325	4.98133e-66	8.31155e-65	yes	Phldb2	161	1332.33	4.67067	34.3047	2.8767	2.76812e-33	4.62639e-32	yes	Mapt	1101	2529.33	29.8173	62.0273	1.05675	1.09523e-15	1.75314e-14	yes
Synj1	5000	1164.67	166.381	40.7613	-2.02921	5.06321e-66	8.4404e-65	yes	Itga4	124.667	785.667	1.731	9.383	2.43844	2.8945e-33	4.83314e-32	yes	Trib1	1261	534	33.2533	14.4373	-1.20369	1.10474e-15	1.76681e-14	yes
Ifi204	13	586.333	0.746	29.4997	5.30538	5.10429e-66	8.50105e-65	yes	Svil	248	1216.67	5.411	23.7677	2.13503	2.99585e-33	4.99778e-32	yes	Negr1	114.333	323	2.66133	7.926	1.57444	1.1738e-15	1.87394e-14	yes
Cacnb4	1919.33	251.333	32.5027	3.604	-3.17289	6.47879e-66	1.07803e-64	yes	Ccdc88b	58.3333	455	2.19867	12.5933	2.51796	3.0269e-33	5.04492e-32	yes	Rin1	368.333	122.333	13.27	3.86533	-1.7795	1.18414e-15	1.88879e-14	yes
Erap1	263.667	1349	8.17167	30.7473	1.91176	7.02571e-66	1.16796e-64	yes	Trim2	4777	1575	92.3163	26.8333	-1.78256	3.23453e-33	5.38602e-32	yes	Lingo1	64.6667	242	2.798	10.243	1.87217	1.22119e-15	1.94618e-14	yes
Grm7	501.667	26.6667	16.982	1.01333	-4.06683	7.29997e-66	1.21244e-64	yes	Grm3	390.667	59.3333	17.2387	2.28633	-2.91454	3.40596e-33	5.66628e-32	yes	Tnik	385.333	810.333	6.48367	13.5607	1.06455	1.26401e-15	2.01088e-14	yes
Rasgef1a	616	63.3333	26.108	2.45533	-3.4105	7.4853e-66	1.24208e-64	yes	Ptk7	134.333	762.667	4.255	21.0767	2.30842	3.4731e-33	5.77267e-32	yes	Mc5r	73.6667	246.667	2.11333	7.26333	1.78111	1.29135e-15	2.05258e-14	yes
Nwd1	1101.33	118.667	15.712	1.407	-3.48117	7.61133e-66	1.26183e-64	yes	Pcyt1b	1586	364	43.7	8.828	-2.30747	3.53736e-33	5.8741e-32	yes	Matn2	1278.67	2916.33	41.4477	95.917	1.2105	1.30578e-15	2.07369e-14	yes
Myo7a	55.3333	782	1.5	18.117	3.59431	8.95491e-66	1.48322e-64	yes	Mgat5b	478	95.6667	15.136	2.64	-2.51937	3.90196e-33	6.47362e-32	yes	Sema4d	1862.67	4066.33	72.3157	174.893	1.27409	1.31199e-15	2.08174e-14	yes
Scn1b	3954.33	573	338.865	41.8727	-3.01663	9.07512e-66	1.50175e-64	yes	Nos1	1215.33	329	16.8387	3.851	-2.12847	3.93544e-33	6.52317e-32	yes	Lpcat2	552.667	1327.33	22.8803	55.8957	1.28863	1.32133e-15	2.09472e-14	yes
Patj	1446	114	51.125	3.732	-3.77601	9.79502e-66	1.6194e-64	yes	Bak1	208.333	912	14.0583	50.236	1.8373	3.9823e-33	6.59482e-32	yes	Or10ad1	6	84	0.381	5.556	3.86618	1.47586e-15	2.33766e-14	yes
Vstm2l	484.667	9.33333	47.7507	0.769	-5.95639	1.24e-65	2.0482e-64	yes	Myo9b	601.667	2601.33	11.1373	41.736	1.90589	4.09258e-33	6.77125e-32	yes	Gjb5	148	29.6667	9.80033	2.01367	-2.28301	1.49582e-15	2.36721e-14	yes
Fads1	6290	1766.33	245.471	58.5293	-2.06832	1.30303e-65	2.15036e-64	yes	Gabbr2	2378	316.333	55.578	6.671	-3.05854	4.15501e-33	6.86828e-32	yes	Iqsec3	103	368	1.69133	6.15533	1.86368	1.58805e-15	2.51098e-14	yes
Mcm7	192	1150.33	15.032	60.7797	2.01555	1.37249e-65	2.26292e-64	yes	Madd	2218.33	724	51.711	14.773	-1.80751	4.20743e-33	6.94859e-32	yes	Fnip2	3520.33	1690	69.448	31.4807	-1.14147	1.65214e-15	2.61004e-14	yes
Celsr2	3377.33	379.667	47.161	5.106	-3.20733	1.39934e-65	2.30509e-64	yes	Flywch1	5737.67	1557.67	373.4	87.0483	-2.10083	4.29987e-33	7.09479e-32	yes	Arxes2	248.333	576	18.493	44.192	1.25681	1.66334e-15	2.62545e-14	yes
Ank3	7704.33	1825.67	209.756	42.3817	-2.3072	1.61618e-65	2.65985e-64	yes	Dgkk	278	23	4.79567	0.347	-3.78872	4.33713e-33	7.14975e-32	yes	Sinhcaf	278.333	96	13.394	4.64333	-1.52835	1.68991e-15	2.66506e-14	yes
Crebl2	1294.33	196.667	52.0933	7.056	-2.88418	1.8097e-65	2.97565e-64	yes	Pdia4	795	2370.67	44.7217	115.674	1.37101	4.65801e-33	7.67175e-32	yes	Dmtn	165.333	513	7.40533	24.039	1.69874	1.6957e-15	2.67187e-14	yes
Ccdc92b	430	18	14.4673	0.510333	-4.82522	2.01586e-65	3.31162e-64	yes	Gpc5	602.333	85	28.564	3.54967	-3.00844	4.85597e-33	7.99051e-32	yes	Rab6b	678.667	2097.67	15.7317	49.6237	1.65736	1.70879e-15	2.68807e-14	yes
Dcaf12l1	546.667	46.6667	20.9097	1.525	-3.77729	2.16475e-65	3.55298e-64	yes	Map3k9	487.667	78.6667	16.8123	2.238	-2.90924	5.19067e-33	8.53351e-32	yes	Cntn2	1659	3346	27.6023	56.839	1.04209	1.70894e-15	2.68807e-14	yes
Trim66	510.667	22.3333	7.83367	0.276667	-4.82347	2.18662e-65	3.58562e-64	yes	Fabp4	7.33333	259.333	1.105	33.8207	4.93579	6.80468e-33	1.11768e-31	yes	B3gnt5	226.667	66	6.20267	1.856	-1.74069	1.77323e-15	2.78676e-14	yes
Atad2	113	926	2.75433	18.6763	2.76144	2.26534e-65	3.71133e-64	yes	Napg	2345.33	705	89.8663	24.325	-1.88534	6.99241e-33	1.14748e-31	yes	Fosl1	82.6667	3.33333	5.07367	0.218	-4.54063	1.80416e-15	2.83292e-14	yes
Limd1	316	1419	8.779	33.4403	1.92946	2.48053e-65	4.0602e-64	yes	Baiap3	784.333	122.333	24.0247	3.22	-2.89938	7.27853e-33	1.19335e-31	yes	Adgrb3	109.667	333.333	2.42533	8.669	1.83768	2.02696e-15	3.17452e-14	yes
Fam20c	794.333	4507.33	30.1683	146.747	2.28222	2.56087e-65	4.18793e-64	yes	Itgal	21	424.667	0.563	9.87433	4.13248	7.91611e-33	1.29671e-31	yes	Gng4	50	189	1.79867	6.96033	1.95223	2.04762e-15	3.20411e-14	yes
Fli1	78.3333	841.333	3.483	30.017	3.10738	2.68115e-65	4.38067e-64	yes	Cd276	103.667	605.667	4.30633	21.4893	2.31909	8.40505e-33	1.37556e-31	yes	Gpr158	81.3333	350.667	1.28733	5.79267	2.16984	2.11997e-15	3.31447e-14	yes
Fam107a	2083	184	101.893	7.525	-3.75921	3.17468e-65	5.18236e-64	yes	Cfp	42	566.333	3.455	40.175	3.53954	8.57025e-33	1.40133e-31	yes	Hif1a	8397.67	4010	209.134	102.398	-1.03024	2.15878e-15	3.37223e-14	yes
Cyp1b1	169.333	2670.67	4.611	60.7277	3.7192	3.60104e-65	5.87304e-64	yes	Ppp3r1	6687.67	2486.33	314.89	102.122	-1.62456	9.01681e-33	1.47302e-31	yes	Gstm1	1476.67	3212.33	130.88	293.085	1.16307	2.22312e-15	3.46976e-14	yes
Cenpe	18	490.333	0.453667	7.68467	4.08228	3.82215e-65	6.22805e-64	yes	Gfpt2	61	435.667	2.77033	17.3907	2.65018	9.55919e-33	1.56021e-31	yes	Rbl1	601.333	247.333	14.193	5.977	-1.24769	2.24034e-15	3.49361e-14	yes
Cspg4	337.667	1655.33	5.588	23.2557	2.05718	3.99479e-65	6.50349e-64	yes	Adcy7	380.333	1665.67	8.699	32.8797	1.91827	1.00364e-32	1.63663e-31	yes	Cald1	7039	2961.67	224.972	90.782	-1.30927	2.26216e-15	3.52462e-14	yes
Fez1	6741.33	1553.33	584.208	112.101	-2.38168	4.79248e-65	7.7951e-64	yes	Dcun1d4	1675.67	520	62.162	14.8593	-2.06466	1.03364e-32	1.68403e-31	yes	Ccl11	376.333	119.667	39.8597	13.0303	-1.61306	2.27401e-15	3.54004e-14	yes
Ifi207	8.33333	667.667	0.335	22.9877	6.10056	4.86999e-65	7.91406e-64	yes	Htr7	406.333	44	18.426	1.738	-3.40624	1.06394e-32	1.73185e-31	yes	Elovl2	33.3333	154.667	0.996667	4.78433	2.26313	2.31725e-15	3.60426e-14	yes
Aifm3	566.333	26	29.9237	1.139	-4.71545	5.27611e-65	8.56634e-64	yes	Maf	432.667	1668.67	12.8737	38.4377	1.5781	1.10842e-32	1.80262e-31	yes	Cacng2	12	103.667	0.247667	2.20233	3.15256	2.61833e-15	4.06558e-14	yes
Il13ra1	178.667	1648	6.53633	50.813	2.95864	5.66448e-65	9.18866e-64	yes	Bst2	56.6667	766.667	9.58867	111.524	3.53988	1.1186e-32	1.81756e-31	yes	Pxdn	2315	893	41.1487	16.339	-1.33253	2.62687e-15	4.07535e-14	yes
Ctnnd2	1689.67	267.667	47.5437	6.24667	-2.92809	6.20327e-65	1.00536e-63	yes	Entpd1	253.667	1346	10.768	46.7443	2.11804	1.16167e-32	1.88584e-31	yes	Nsl1	139.333	24.6667	5.187	0.617333	-3.07078	2.64953e-15	4.107e-14	yes
Rab7b	140.333	2123.67	8.00367	106.178	3.72968	6.37443e-65	1.03218e-63	yes	Ahcy	27.3333	444.667	1.44167	20.602	3.83697	1.18786e-32	1.92662e-31	yes	Pole2	230	70	15.422	4.81267	-1.68008	2.71756e-15	4.20885e-14	yes
Plcb4	1463.33	248	50.8253	9.28067	-2.45325	7.81846e-65	1.26487e-63	yes	Dlk1	691.667	156.333	33.5907	8.055	-2.0601	1.20941e-32	1.95983e-31	yes	Mfap2	260.333	665.667	27.6107	72.4593	1.39195	2.73726e-15	4.23574e-14	yes
Myo1e	623.333	2725.67	18.1717	67.38	1.89063	8.11245e-65	1.31126e-63	yes	Eif4ebp1	28	268	1.887	15.7567	3.0618	1.3165e-32	2.13145e-31	yes	Aspa	317	776.333	25.1107	63.315	1.33425	2.77755e-15	4.29443e-14	yes
Tspoap1	836	64	22.804	2.166	-3.39618	1.11296e-64	1.79732e-63	yes	Ctla2b	14.6667	291.333	1.814	34.7067	4.25797	1.32557e-32	2.14424e-31	yes	P2ry13	483	1084.33	21.91	50.2297	1.19695	2.82902e-15	4.37029e-14	yes
Ano3	1114.33	72.3333	22.488	1.241	-4.17958	1.11663e-64	1.80165e-63	yes	Prrx1	196	1188.33	5.15367	27.0007	2.38932	1.36126e-32	2.19999e-31	yes	Lcn2	113.333	3227.33	14.526	413.181	4.83007	2.87888e-15	4.44352e-14	yes
Rgs16	79.6667	1018	4.62133	49.3433	3.41647	1.14254e-64	1.84181e-63	yes	Myo1c	410.333	2065.33	12.0967	52.669	2.12234	1.40127e-32	2.26265e-31	yes	Siglecf	53.3333	307.667	2.414	14.135	2.54977	2.88263e-15	4.44552e-14	yes
Necap1	3099.33	833.667	167.999	38.5187	-2.12482	1.28475e-64	2.06921e-63	yes	Efr3b	3961.67	1388	81.5367	25.321	-1.68711	1.45419e-32	2.34599e-31	yes	Slc28a2	119.667	15	4.59233	0.558333	-3.04003	2.90987e-15	4.47991e-14	yes
Gabarapl1	7484.33	1688	639.689	121.679	-2.39429	1.32387e-64	2.13032e-63	yes	Lpar6	72	468	1.79033	10.1557	2.50398	1.49442e-32	2.40875e-31	yes	Nrsn2	33	190.333	2.54967	15.248	2.58024	3.43961e-15	5.29099e-14	yes
Mrap2	569.333	23.6667	37.779	1.33033	-4.82772	1.4659e-64	2.35678e-63	yes	Lrrc25	14	284.667	1.02233	19.8397	4.27845	1.50697e-32	2.42683e-31	yes	Cdr2	680.667	307	30.8447	14.2947	-1.10954	3.8565e-15	5.92725e-14	yes
Fads2	4308.67	1087.33	183.595	39.3633	-2.22161	1.54879e-64	2.48783e-63	yes	Adamts15	85.6667	886	1.97167	17.87	3.18005	1.5107e-32	2.43068e-31	yes	Rapgef3	181	560.667	7.679	21.9917	1.51797	3.87618e-15	5.95244e-14	yes
Rplp0	4786.33	24616.3	473.771	2067.13	2.12537	1.66022e-64	2.66446e-63	yes	Mdh1	14299.7	4560.67	1252.92	335.032	-1.90292	1.55796e-32	2.50448e-31	yes	Rfc5	553.333	232	23.567	10.2807	-1.19683	3.93789e-15	6.0421e-14	yes
Dcun1d4	1675.67	372.667	62.162	10.852	-2.51807	2.01011e-64	3.22313e-63	yes	Entrep2	428.333	71.6667	11.9877	1.75967	-2.76818	1.59599e-32	2.56335e-31	yes	Slc8a3	76.6667	240.333	2.04467	6.18033	1.59582	3.98438e-15	6.10311e-14	yes
Gda	122.667	2144.33	3.335	50.7247	3.92693	2.26121e-64	3.62254e-63	yes	Abi3	155.333	754	5.67533	29.0187	2.3542	1.6642e-32	2.67053e-31	yes	Lat2	1741.33	749	124.345	54.759	-1.18318	4.37496e-15	6.69571e-14	yes
Inpp5j	919.667	75	37.0987	2.662	-3.80078	2.38019e-64	3.80979e-63	yes	Smpdl3a	647.667	2843.67	44.2363	169.223	1.93562	1.80292e-32	2.89058e-31	yes	Col11a2	369.667	954.333	7.58667	19.7217	1.37824	4.42268e-15	6.76305e-14	yes
Irf5	76.3333	878.333	4.71267	46.4217	3.30018	2.6262e-64	4.19982e-63	yes	Cxcl1	4	229.667	0.577333	28.3813	5.61939	1.82542e-32	2.92406e-31	yes	Lifr	421	1139.67	6.22033	14.5663	1.22757	4.44343e-15	6.78905e-14	yes
Gpx7	57.6667	824.333	6.38933	74.9547	3.55228	2.68847e-64	4.29561e-63	yes	Rusc1	2143.33	587	91.0593	30.7253	-1.56738	1.86109e-32	2.97857e-31	yes	Pask	195.333	53.6667	4.65733	1.094	-2.08989	4.55598e-15	6.95515e-14	yes
Apba2	1599.33	345.667	84.1303	15.1587	-2.47248	2.8199e-64	4.50164e-63	yes	Gba1	642.333	2020.33	48.1887	132.42	1.45836	1.87973e-32	3.00574e-31	yes	Gas1	425.667	1053.33	16.467	41.4697	1.33248	4.72497e-15	7.20708e-14	yes
Cdc20	33.6667	948	2.70633	60.699	4.48726	3.0021e-64	4.78828e-63	yes	P3h3	156.667	1133.67	7.366	46.4803	2.65767	1.8895e-32	3.0187e-31	yes	6330403K07Rik	386.667	1311.67	29.2667	102.42	1.80716	5.10252e-15	7.77642e-14	yes
Emilin2	626.333	2849	25.452	99.4033	1.96552	3.36235e-64	5.35814e-63	yes	Fry	2147	737	40.453	15.621	-1.37276	2.14999e-32	3.43184e-31	yes	Dtna	499.667	1115.33	13.8273	30.5853	1.14532	5.29272e-15	8.05951e-14	yes
Tyms	46.3333	642.667	3.03433	63.5307	4.388	3.41537e-64	5.43783e-63	yes	Gna15	30	288.667	2.05267	17.204	3.06717	2.18581e-32	3.48594e-31	yes	Egfl7	715.333	242.333	68.2763	24.5503	-1.47564	5.33662e-15	8.11954e-14	yes
Srrm3	448.333	10.6667	29.458	0.311333	-6.56406	3.5058e-64	5.5769e-63	yes	Amz1	74	475.333	3.61267	19.808	2.45495	2.49349e-32	3.97314e-31	yes	Icosl	120.333	369.667	4.972	15.515	1.64177	5.3705e-15	8.16424e-14	yes
Rack1	3010	14079	278.684	1106.92	1.98985	3.74079e-64	5.9455e-63	yes	Clec2d	78.3333	506.667	8.698	48.7607	2.48696	2.51689e-32	4.00689e-31	yes	Klc2	429.333	933.667	15.901	35.5163	1.15937	5.50435e-15	8.36071e-14	yes
Plscr1	47	510.667	3.68767	33.3227	3.17572	3.96499e-64	6.29629e-63	yes	Gnl3l	3521.33	1234.67	99.4123	30.1357	-1.72195	2.71802e-32	4.32329e-31	yes	Sardh	524	1113	14.0367	30.4197	1.1158	5.78798e-15	8.76948e-14	yes
Jakmip1	494.333	25	35.644	2.02467	-4.1379	4.34945e-64	6.90074e-63	yes	Hoxb5	577.333	102	40.9723	6.32733	-2.69498	2.7321e-32	4.34188e-31	yes	Tspan15	532.333	1080	16.716	34.756	1.05603	5.89536e-15	8.90986e-14	yes
Plp1	131662	35136	5847.03	1359.22	-2.10492	4.39245e-64	6.96287e-63	yes	Rplp0	4786.33	16063.3	473.771	1383.94	1.54652	2.9538e-32	4.6901e-31	yes	Pcdh12	230.333	46.6667	5.23333	1.22233	-2.09809	6.07545e-15	9.17438e-14	yes
Zc3hav1	217.333	1554.67	6.191	39.435	2.67123	5.25757e-64	8.32694e-63	yes	Apoc2	5.33333	214.333	1.15767	39.6897	5.09947	3.06265e-32	4.85867e-31	yes	St8sia2	39.3333	249	0.815	5.44667	2.7405	6.41964e-15	9.67803e-14	yes
Slc30a3	497.667	8.66667	32.742	0.545667	-5.90698	6.14e-64	9.71602e-63	yes	Slamf9	44	383.333	4.436	34.1843	2.946	3.18225e-32	5.04399e-31	yes	Frmpd1	39	253	1.214	6.65	2.45359	6.49505e-15	9.78358e-14	yes
Slc9a6	2491	688.667	88.4667	22.0843	-2.00211	6.21886e-64	9.83222e-63	yes	Skap2	558	1835	31.4773	91.4973	1.53942	3.29356e-32	5.21586e-31	yes	Lgals3	16064	6587.67	1580.43	670.932	-1.23608	6.67404e-15	1.00365e-13	yes
Aurkb	7	483.667	0.500333	28.632	5.8386	6.27145e-64	9.9067e-63	yes	Pcsk1n	4210.67	1240	256.85	66.195	-1.95613	3.43466e-32	5.43457e-31	yes	Nudcd2	727	331.333	55.1523	25.6637	-1.10369	7.0048e-15	1.05165e-13	yes
Psap	25001.7	148021	1267.51	6355.04	2.3259	7.81255e-64	1.23303e-62	yes	Rapgefl1	551	113.667	15.2003	2.742	-2.4708	3.54738e-32	5.60802e-31	yes	Glcci1	39.6667	177	1.28467	3.998	1.63788	7.42237e-15	1.1125e-13	yes
Cdk14	3243.67	895	90.049	21.2833	-2.08099	8.43667e-64	1.33038e-62	yes	Il1rl2	12.3333	213.667	0.559333	7.46367	3.7381	3.70483e-32	5.85182e-31	yes	Gpr155	372	865	8.933	21.294	1.25323	7.60996e-15	1.13685e-13	yes
Ezh2	62.6667	618.667	3.884	28.9823	2.89956	9.59659e-64	1.51197e-62	yes	Nfatc1	155	803.333	4.67667	21.0267	2.16867	3.82142e-32	6.03071e-31	yes	Tsc22d4	1855	3539.67	213.685	486.38	1.1866	8.18877e-15	1.22192e-13	yes
Eml2	3252	732.667	171.77	39.7783	-2.11043	1.0301e-63	1.62154e-62	yes	Hebp1	323.333	1315.33	40.8087	145.239	1.83148	4.36416e-32	6.88125e-31	yes	Ntng1	37.3333	188	1.078	5.61767	2.38161	8.19288e-15	1.22192e-13	yes
Aldh5a1	1720.33	317.333	40.8467	6.402	-2.67362	1.08472e-63	1.70602e-62	yes	Lrfn5	617.667	81.3333	22.7417	2.59367	-3.13227	4.49307e-32	7.07835e-31	yes	Shisa9	25.6667	141.667	0.685333	3.858	2.49298	8.58052e-15	1.27764e-13	yes
Uchl1	8495	1629	970.173	158.459	-2.61413	1.09599e-63	1.72225e-62	yes	Csrp2	126.333	661.667	14.6143	71.4707	2.28997	4.55616e-32	7.17149e-31	yes	Fam167a	110	320.333	2.97333	8.841	1.57213	8.7223e-15	1.29768e-13	yes
Wipf1	608.333	2365.33	18.4827	66.8893	1.8556	1.67743e-63	2.63365e-62	yes	Man2a1	231.667	1292.67	4.59033	21.655	2.23803	4.73527e-32	7.44694e-31	yes	Efemp1	552.667	1276.67	35.531	83.2887	1.22904	8.75505e-15	1.30149e-13	yes
Dynll2	11151	1838.33	601.978	85.309	-2.81894	1.68955e-63	2.65039e-62	yes	Abat	10546.3	3732.67	306.852	94.796	-1.69464	4.88092e-32	7.66936e-31	yes	Lratd1	197.667	473.667	5.40333	13.3607	1.30607	8.79913e-15	1.30697e-13	yes
Spcs3	641	2358	24.8583	77.7347	1.64483	2.10848e-63	3.30469e-62	yes	Glipr2	236.667	1093	14.0103	57.6803	2.04159	4.93459e-32	7.74696e-31	yes	Kcnc4	30.6667	170	0.994667	5.522	2.47291	9.02827e-15	1.33881e-13	yes
Ddx39a	156.333	993.333	12.6643	67.971	2.42415	2.44018e-63	3.82126e-62	yes	Tubg2	580.667	97	44.3977	6.52	-2.76754	5.04219e-32	7.90904e-31	yes	Plaur	1183	513	89.3103	39.9457	-1.16079	9.17653e-15	1.35969e-13	yes
Tmsb10	1204	4884.33	284.474	974.861	1.7769	2.6635e-63	4.16736e-62	yes	Psap	25001.7	105633	1267.51	4650.45	1.87537	5.25488e-32	8.23552e-31	yes	Mycl	74.3333	251	2.52067	9.061	1.84586	9.19471e-15	1.36127e-13	yes
Col25a1	577	37.6667	14.182	0.774667	-4.19434	3.11072e-63	4.86289e-62	yes	Sp100	104.333	692.333	7.92967	45.4957	2.5204	5.37988e-32	8.42413e-31	yes	Vwf	4103	1543	69.9263	31.3293	-1.15832	9.65161e-15	1.42775e-13	yes
B3galt2	433.333	25.3333	6.294	0.311	-4.33899	3.29633e-63	5.1486e-62	yes	Rasgef1a	616	144.333	26.108	5.239	-2.31713	5.46339e-32	8.54752e-31	yes	Kcnj16	143	446	4.42067	14.254	1.68903	1.05297e-14	1.5551e-13	yes
Zfyve9	2462.33	591.667	69.4757	14.7033	-2.24036	3.38702e-63	5.28567e-62	yes	Furin	402.333	1965.67	13.5903	54.1097	1.99331	5.69949e-32	8.90921e-31	yes	Syt7	109.333	386.667	2.70767	10.307	1.9285	1.06446e-14	1.57079e-13	yes
Grip2	545.333	16.3333	14.4853	0.404	-5.16409	3.62019e-63	5.64469e-62	yes	Nxpe3	836	159.667	17.428	2.93233	-2.57129	5.74339e-32	8.97009e-31	yes	Crispld2	445.333	1081.33	12.926	31.4717	1.28378	1.15593e-14	1.70439e-13	yes
Nin	242.667	1269	4.629	18.8253	2.0239	3.65906e-63	5.70038e-62	yes	Rtn3	22233.7	8638.33	1004.37	360.085	-1.47988	6.16417e-32	9.61897e-31	yes	Cidea	4.33333	76.3333	0.439667	8.01567	4.18834	1.28654e-14	1.89236e-13	yes
Vasp	277.333	1503.33	16.8823	77.4183	2.19716	3.91983e-63	6.10138e-62	yes	Tbc1d2b	335.667	1605.33	7.62833	31.8487	2.06179	6.54398e-32	1.02029e-30	yes	Stc1	113.667	16	3.09033	0.451333	-2.7755	1.30421e-14	1.91679e-13	yes
Racgap1	282	1340.33	13.9587	54.7643	1.97208	3.94182e-63	6.13033e-62	yes	Serpinf1	690.667	4151.33	70.181	373.987	2.41384	6.63281e-32	1.03325e-30	yes	She	327	115.667	6.49433	2.36167	-1.45938	1.3315e-14	1.95531e-13	yes
Tox2	573	48	31.7037	2.133	-3.89369	4.40592e-63	6.8462e-62	yes	Tango2	1445.67	439.667	148.84	36.4297	-2.03058	6.69952e-32	1.04274e-30	yes	Atcay	240	551	7.339	17.3323	1.23981	1.36191e-14	1.99834e-13	yes
Csf1r	1682	5610.67	75.518	213.829	1.50157	5.13857e-63	7.97779e-62	yes	Arpp21	506.667	107.333	22.458	3.83567	-2.54968	7.0245e-32	1.09238e-30	yes	Sptbn4	48.3333	209.333	0.919	4.65167	2.33961	1.42806e-14	2.09372e-13	yes
Hpgds	42.6667	568	1.636	18.6337	3.50967	5.53841e-63	8.59118e-62	yes	Mapre3	2621.67	841.667	179.669	51.455	-1.80396	7.54496e-32	1.17232e-30	yes	Lcp1	12069	5073	378.438	167.317	-1.17747	1.53067e-14	2.24234e-13	yes
Nuf2	33.6667	521.333	1.99267	28.4957	3.83797	5.92055e-63	9.17609e-62	yes	Tapbp	734.667	4548.33	37.422	196.975	2.39605	8.29499e-32	1.28775e-30	yes	Serpina1a	53.3333	249.667	4.347	21.3103	2.29346	1.54782e-14	2.26564e-13	yes
Zmat4	514.333	21	16.9813	0.686	-4.6296	6.07216e-63	9.40301e-62	yes	Akap13	453	2115.67	8.48667	32.0487	1.91699	9.26703e-32	1.43742e-30	yes	Trpm2	215	617	4.37767	12.1937	1.4779	1.57671e-14	2.30607e-13	yes
Necab2	437.333	22.6667	29.9397	1.30433	-4.52067	6.25559e-63	9.67878e-62	yes	Calb1	765.333	88.6667	24.623	2.496	-3.30232	9.31464e-32	1.44357e-30	yes	Adgrg1	946	2042.33	31.4157	78.619	1.32339	1.69546e-14	2.47775e-13	yes
Dab1	600.667	49	19.0173	1.90033	-3.32299	6.41969e-63	9.92418e-62	yes	Itih5	1528.33	8558	26.1043	126.678	2.27881	9.82998e-32	1.52213e-30	yes	Efhd1	466.667	926	28.9393	58.7937	1.02263	1.72847e-14	2.52395e-13	yes
Ostc	650.333	2763.67	81.7303	295.375	1.8536	6.76839e-63	1.04543e-61	yes	Pde4a	1152.33	287.667	43.5343	8.42967	-2.36861	1.00406e-31	1.55343e-30	yes	Bsn	174	476	1.89767	5.40833	1.51096	1.8162e-14	2.6478e-13	yes
AI854703	591	22.3333	22.1577	0.896667	-4.62709	6.89088e-63	1.06344e-61	yes	Ube2o	2526.33	761.333	64.9863	17.1893	-1.91862	1.0799e-31	1.66933e-30	yes	Slc32a1	34.3333	164	1.39167	6.84567	2.29838	1.83132e-14	2.66745e-13	yes
Lpp	201.667	1896.33	1.83033	14.1267	2.94824	9.08734e-63	1.40122e-61	yes	Mki67	47	324.667	0.670667	3.79133	2.49904	1.17515e-31	1.81502e-30	yes	Dpt	179.333	590.333	11.9777	39.9197	1.73675	1.83262e-14	2.66745e-13	yes
Wdr47	1496.33	345.333	47.6893	9.377	-2.34647	1.00141e-62	1.5428e-61	yes	Rcbtb2	321.667	1304	19.5503	84.0317	2.10374	1.23343e-31	1.90341e-30	yes	Amer2	106	342.667	1.50867	4.05133	1.42512	1.90321e-14	2.76354e-13	yes
Arpc3	1394	4914.67	208.904	623.733	1.57809	1.09175e-62	1.68054e-61	yes	Pcsk1	524.667	77.3333	14.0243	1.81033	-2.9536	1.38501e-31	2.13551e-30	yes	Selenbp1	198	484	13.244	33.0233	1.31815	1.90555e-14	2.76472e-13	yes
Insyn1	1008.33	128.667	66.2117	7.23267	-3.19449	1.13601e-62	1.7472e-61	yes	Sh2b3	236	1079	8.52	30.2997	1.83038	1.8817e-31	2.89887e-30	yes	Spock3	115.333	415.333	4.38367	16.2357	1.88896	1.92361e-14	2.7887e-13	yes
Syndig1	820.667	59	58.8943	3.40567	-4.11212	1.16256e-62	1.78651e-61	yes	Cacnb4	1919.33	520.333	32.5027	7.691	-2.07931	1.92398e-31	2.96149e-30	yes	Lmo4	696.667	1426.67	53.0827	113.066	1.09085	1.9448e-14	2.81492e-13	yes
Abracl	79.3333	736	17.1363	109.179	2.67156	1.28976e-62	1.9803e-61	yes	Nr2f2	263.333	1345	13.3567	56.1593	2.07197	1.93892e-31	2.98196e-30	yes	Dck	718.333	338.667	26.729	12.88	-1.05327	1.96842e-14	2.84683e-13	yes
Ikzf1	87	827.333	4.882	23.5187	2.26826	1.39309e-62	2.13713e-61	yes	Slc16a3	39.3333	330.333	2.77133	21.0817	2.92734	1.98356e-31	3.04802e-30	yes	Aif1	401.667	953.333	54.4593	132.587	1.28369	2.1274e-14	3.07426e-13	yes
Lasp1	1380	4765	58.56	153.853	1.39357	1.44353e-62	2.21264e-61	yes	Pear1	126.667	1013.33	6.10467	33.433	2.45329	2.04537e-31	3.14033e-30	yes	H2ac19	13.3333	125.667	2.79567	28.2123	3.33506	2.16263e-14	3.12024e-13	yes
Psmb8	91.3333	878.333	12.0197	96.6637	3.00758	1.65373e-62	2.53268e-61	yes	Trank1	596.667	106.667	7.68467	1.191	-2.68981	2.07727e-31	3.18661e-30	yes	Iglon5	125.667	337.667	5.50033	15.0797	1.45501	2.1705e-14	3.12911e-13	yes
Frmpd4	475	18.6667	8.57733	0.287	-4.90141	1.66481e-62	2.54749e-61	yes	Pcdh9	2412	793	59.0227	16.6897	-1.82231	2.17305e-31	3.33072e-30	yes	Dpyd	43.3333	184	1.099	4.82167	2.13334	2.19521e-14	3.16222e-13	yes
Map3k9	487.667	39.3333	16.8123	1.04267	-4.01117	2.2931e-62	3.50595e-61	yes	Tac2	437.667	40.3333	87.6387	7.054	-3.63505	2.21967e-31	3.3993e-30	yes	C1ql1	341.667	850.667	26.4927	67.5277	1.34989	2.21869e-14	3.19098e-13	yes
Asf1b	15	410.333	1.12067	26.2503	4.54991	2.55459e-62	3.90244e-61	yes	Ankrd34c	255	16	6.84967	0.411	-4.05882	2.38536e-31	3.64997e-30	yes	Igip	272.667	827	10.9127	34.3773	1.65545	2.23447e-14	3.21112e-13	yes
Ggt7	1135	195.333	58.2627	8.536	-2.77094	2.59378e-62	3.95896e-61	yes	Septin3	3695.33	1247.67	117.551	49.7217	-1.24134	2.907e-31	4.4444e-30	yes	Tmem150c	64	245.333	2.65067	10.784	2.02447	2.3253e-14	3.33637e-13	yes
Ppp2r2c	5297.33	880.667	173.954	24.7637	-2.81241	2.70624e-62	4.12713e-61	yes	H3f3b	2753.33	8189.67	185.43	480.062	1.37235	2.92278e-31	4.46476e-30	yes	Chtf18	182.667	51.3333	6.77567	2.16967	-1.64289	2.41327e-14	3.45984e-13	yes
Ncapd2	173	969	6.54633	25.1493	1.94176	2.96185e-62	4.51315e-61	yes	Kdelr1	703.667	2232.33	64.5357	170.226	1.39929	2.99396e-31	4.56964e-30	yes	Fabp4	919	259.333	115.823	33.8207	-1.77594	2.41907e-14	3.46542e-13	yes
Smim13	3056.67	867.667	91.711	22.1643	-2.04885	3.1101e-62	4.73505e-61	yes	Slc40a1	177.667	794	7.108	27.5333	1.95366	3.19442e-31	4.87149e-30	yes	Septin11	4903.33	2283.33	136.91	63.1873	-1.11552	2.45111e-14	3.50855e-13	yes
Cacng7	2097.33	326.333	126.838	16.77	-2.91903	3.25439e-62	4.95055e-61	yes	Wnk3	315.667	46.3333	7.98433	1.019	-2.97002	3.51888e-31	5.36178e-30	yes	Cdk5r2	45.3333	231.667	1.85033	9.81367	2.40701	2.46612e-14	3.52725e-13	yes
Elovl4	844.667	111.333	38.2293	4.254	-3.16779	3.35387e-62	5.09761e-61	yes	Cyp51	3058	899.667	104.68	26.8223	-1.96448	3.68373e-31	5.60825e-30	yes	Raet1e	82.3333	3	7.358	0.284	-4.69535	2.476e-14	3.53859e-13	yes
Fdft1	3008.67	696.333	135.638	26.1323	-2.37585	3.56448e-62	5.41316e-61	yes	Cdh7	257.333	14.3333	9.52833	0.453	-4.39464	3.78879e-31	5.76335e-30	yes	Ptpn7	311	111.333	15.224	5.402	-1.49478	2.49365e-14	3.561e-13	yes
Gdap1l1	868	68.6667	57.9217	3.37667	-4.10043	3.77335e-62	5.72556e-61	yes	Prrx2	29	335.667	2.79933	29.649	3.40483	3.96107e-31	6.02036e-30	yes	Snap91	257	658	7.43333	18.5747	1.32126	2.52853e-14	3.60515e-13	yes
Ugdh	400.333	1653.67	21.098	74.293	1.81612	3.92586e-62	5.95198e-61	yes	Strbp	1454.67	390.333	37.8007	10.6137	-1.83249	4.1509e-31	6.3036e-30	yes	Tlcd3b	33.6667	168.333	1.721	8.79867	2.35404	2.6305e-14	3.74464e-13	yes
Med12l	727.667	105.333	9.95933	1.28567	-2.95353	4.06956e-62	6.16466e-61	yes	Cd34	603	2523	33.5463	119.888	1.83746	4.38187e-31	6.64877e-30	yes	Podxl	2730.33	1059.67	57.6037	22.989	-1.32522	2.70009e-14	3.83768e-13	yes
Dram1	20.6667	417	0.994667	16.9633	4.09206	5.05048e-62	7.64418e-61	yes	Cpne9	255	27.6667	14.0863	1.30367	-3.43365	4.49612e-31	6.81642e-30	yes	D3Ertd751e	73	230.667	2.53233	8.674	1.77623	2.70293e-14	3.83872e-13	yes
Shisa5	678.667	3507.67	66.8523	253.639	1.92373	6.4912e-62	9.81658e-61	yes	Sgpp2	1596.33	197	53.1577	5.84833	-3.18418	4.63007e-31	7.01363e-30	yes	Fbxo31	270.333	613.333	7.812	17.4583	1.16015	2.79395e-14	3.96487e-13	yes
Tfdp1	497.667	1940.67	30.3703	97.1067	1.67691	7.44844e-62	1.12548e-60	yes	Tub	1150.67	360.667	26.1363	7.186	-1.8628	4.815e-31	7.28158e-30	yes	Edil3	1010.67	1998	22.0517	44.7273	1.02027	2.81561e-14	3.99249e-13	yes
Slc18a3	494.333	22	27.4503	1.05833	-4.69696	7.51636e-62	1.13479e-60	yes	Arhgap19	262.333	1855.33	7.37867	42.895	2.53938	4.86335e-31	7.34857e-30	yes	Adamtsl2	15	115	0.476333	3.70967	2.96125	2.97403e-14	4.21382e-13	yes
Entpd3	775	37	29.9207	1.222	-4.61383	7.80539e-62	1.17745e-60	yes	Pou2f2	41	300.667	1.06267	6.03367	2.50535	5.45155e-31	8.23047e-30	yes	Reep1	506.333	1306	14.8133	39.3037	1.40777	2.9876e-14	4.22975e-13	yes
Wasf3	2244.67	428.667	84.211	14.921	-2.49666	8.88485e-62	1.33917e-60	yes	Tep1	182	912.333	3.015	14.0307	2.21835	5.62327e-31	8.48266e-30	yes	Ptgdr	18	130.667	0.658	4.83333	2.87686	3.04717e-14	4.31073e-13	yes
Trank1	596.667	21	7.68467	0.225333	-5.09185	9.14068e-62	1.37658e-60	yes	Igsf1	236.333	1002.33	11.0693	41.3333	1.90074	6.2744e-31	9.45702e-30	yes	Tbc1d1	1488	713.333	34.5413	16.9613	-1.02607	3.13944e-14	4.4378e-13	yes
Mcm4	217.667	1208.67	8.12467	39.551	2.28333	9.87812e-62	1.4864e-60	yes	Sulf2	2379.67	7492	84.0327	226.548	1.4308	6.71793e-31	1.01171e-29	yes	Cx3cr1	1911	4860.67	58.488	151.618	1.37423	3.33532e-14	4.71101e-13	yes
Lims1	719	3172.67	24.2107	84.7753	1.808	1.00311e-61	1.50816e-60	yes	Sh3pxd2b	615.333	2807.67	11.1583	44.063	1.98145	6.76142e-31	1.01741e-29	yes	Fez1	1553.33	3300	112.101	245.235	1.12937	3.34264e-14	4.71767e-13	yes
Bub1	6.66667	471.333	0.260333	15.803	5.92369	1.11787e-61	1.67931e-60	yes	Slco2b1	381.333	1757.33	12.2907	47.735	1.95748	7.883e-31	1.1852e-29	yes	Rasip1	422.667	137	14.9937	4.98933	-1.58743	3.4114e-14	4.81097e-13	yes
Zfr2	452	23.3333	21.0323	0.801	-4.71466	1.15353e-61	1.73144e-60	yes	Stac2	1674.67	469.667	75.2137	17.995	-2.0634	7.91635e-31	1.18922e-29	yes	Troap	119	18.3333	5.93667	0.948333	-2.64619	3.54611e-14	4.99707e-13	yes
Tax1bp3	212.667	1412	18.899	105.925	2.48666	1.16366e-61	1.74519e-60	yes	Vstm2l	484.667	64	47.7507	5.54633	-3.10591	8.38016e-31	1.25786e-29	yes	Kank4	157.333	436.667	3.73067	10.6863	1.51826	3.58781e-14	5.05191e-13	yes
Septin9	1025.67	4864	44.6227	197.798	2.14818	1.17877e-61	1.76639e-60	yes	Rwdd2a	443	74.3333	50.3273	7.524	-2.74177	9.07887e-31	1.36161e-29	yes	Atp8b1	410.333	141.333	7.80133	2.801	-1.47778	3.73598e-14	5.25645e-13	yes
Gpr37l1	5964.67	1035.67	351.048	51.9427	-2.75668	1.21463e-61	1.81863e-60	yes	Vcam1	495.667	1948	19.447	67.2317	1.78959	9.19309e-31	1.37759e-29	yes	Trnp1	43.6667	308.333	3.065	22.1763	2.85506	3.76989e-14	5.30006e-13	yes
Gnai3	735.667	2999.67	30.3857	105.402	1.79444	1.30432e-61	1.95131e-60	yes	Usp33	2525.33	846.333	84.6847	25.1273	-1.75284	9.27825e-31	1.38921e-29	yes	Rnf208	86.6667	268.667	7.60033	23.6857	1.63988	3.97673e-14	5.5822e-13	yes
Smad9	781.667	76.3333	19.5637	1.64033	-3.57612	1.4257e-61	2.13112e-60	yes	Nes	357.667	1354.67	8.011	26.4897	1.72538	9.78861e-31	1.46441e-29	yes	Nell1	9.66667	88.6667	0.37	3.18	3.10343	4.41022e-14	6.1859e-13	yes
Mad2l1	135.333	861.333	6.34567	41.199	2.69877	1.53707e-61	2.29571e-60	yes	Abi3bp	98.3333	710.333	2.93833	18.8853	2.6842	9.91066e-31	1.48145e-29	yes	Cyp4f18	606.333	136.333	40.5203	9.22633	-2.13482	4.49029e-14	6.28363e-13	yes
Nxpe3	836	88	17.428	1.55067	-3.49045	1.65809e-61	2.47441e-60	yes	Sel1l3	551	1954.67	16.3053	50.786	1.63909	1.03671e-30	1.54839e-29	yes	Vipr1	19	123	0.44	2.92	2.73039	4.50061e-14	6.29322e-13	yes
Tpp1	1307	5108.33	50.4593	165.816	1.71639	2.30611e-61	3.43863e-60	yes	Cd93	253.333	1335.33	5.109	23.3543	2.19258	1.04843e-30	1.56461e-29	yes	Hspb8	1669.67	3376	105.018	217.962	1.05344	4.74348e-14	6.62261e-13	yes
Fam234b	1952.67	386.667	62.098	10.4177	-2.57551	2.51765e-61	3.75097e-60	yes	Top2a	47	339.333	1.223	7.64633	2.64434	1.13191e-30	1.68781e-29	yes	Sall2	378	936	8.95733	22.615	1.33614	4.79456e-14	6.68878e-13	yes
Actn4	1295.67	6533.33	60.782	201.737	1.73076	2.6903e-61	4.0049e-60	yes	Fxyd1	519.667	2045.33	135.681	466.832	1.78268	1.15036e-30	1.71391e-29	yes	Rad54l	157.333	24.3333	6.352	0.996667	-2.67203	4.95863e-14	6.91235e-13	yes
Il17ra	223	1087.67	3.875	16.0177	2.0474	3.16895e-61	4.71356e-60	yes	Abcb9	808	215.333	29.7617	7.01133	-2.08569	1.19025e-30	1.77188e-29	yes	Syngr3	87.6667	352.667	5.09567	21.201	2.05679	5.01907e-14	6.99124e-13	yes
Mapk8ip1	6501	1730	287.452	67.0207	-2.10064	3.17886e-61	4.7244e-60	yes	Plod2	173	823.333	6.40667	26.4233	2.04417	1.26094e-30	1.87556e-29	yes	Adam33	24	140.667	1.24933	7.02067	2.49045	5.49712e-14	7.64538e-13	yes
Arpc2	1775.33	6725.67	167.357	538.486	1.68598	3.34031e-61	4.96028e-60	yes	Gbp9	80	566	2.51767	15.013	2.57605	1.2903e-30	1.91767e-29	yes	Mme	140.333	406.667	2.96433	8.739	1.55976	5.52921e-14	7.68412e-13	yes
Tec	48.3333	812	2.51633	35.4753	3.81742	3.53918e-61	5.25129e-60	yes	Antxr2	99.3333	934.667	2.458	19.8793	3.01571	1.31296e-30	1.94974e-29	yes	Fat4	261	710.667	1.83533	5.155	1.48993	5.8417e-14	8.11219e-13	yes
Kif3c	4164.67	1043.67	103.167	23.5027	-2.13409	3.67246e-61	5.44457e-60	yes	Hrh3	245.333	22.3333	13.195	1.15433	-3.51486	1.334e-30	1.97937e-29	yes	Fcgrt	1329.67	3026	86.924	203.448	1.22684	5.87652e-14	8.15429e-13	yes
Igf2bp2	32.6667	487	1.25233	16.3517	3.70675	3.69762e-61	5.47738e-60	yes	Wdr7	3766.67	1343.67	71.6183	22.483	-1.67149	1.51327e-30	2.24353e-29	yes	Nrsn1	91.3333	313	4.63633	16.634	1.84308	5.9553e-14	8.2541e-13	yes
Mtfp1	541.333	51	51.4687	4.12333	-3.64181	3.78341e-61	5.59988e-60	yes	Shank2	514.333	111	8.864	1.59333	-2.47591	1.5534e-30	2.30114e-29	yes	Htr2c	22.3333	143.667	0.535	3.55433	2.73197	5.95755e-14	8.2541e-13	yes
Tceal6	522.667	14.6667	62.443	1.479	-5.39985	4.05147e-61	5.99174e-60	yes	Tor4a	102	718.667	4.179	25.682	2.61953	1.6956e-30	2.50973e-29	yes	Slc17a6	87.6667	365.333	2.415	10.4637	2.11529	6.35821e-14	8.79577e-13	yes
Tgfbr2	636	4750.33	16.137	104.732	2.69825	4.06069e-61	6.00046e-60	yes	Il1rn	14.3333	256.333	0.991	18.361	4.21162	1.70943e-30	2.52814e-29	yes	Wnk4	66.3333	235.333	1.90033	8.16233	2.10273	6.7399e-14	9.31668e-13	yes
Pimreg	7.33333	460.333	0.650333	35.6033	5.77469	4.26023e-61	6.29019e-60	yes	Ano6	479	2301	14.0323	56.03	1.99744	1.79948e-30	2.65914e-29	yes	Slc12a9	343.667	795.333	11.7173	27.963	1.25487	6.7729e-14	9.35516e-13	yes
Itga4	124.667	857	1.731	10.0037	2.53085	5.5221e-61	8.14668e-60	yes	Tmem140	54.3333	609.333	3.303	29.3343	3.15074	1.80287e-30	2.66199e-29	yes	Esrrg	19.6667	124.667	0.438667	2.85767	2.70364	6.88006e-14	9.49595e-13	yes
Rab39b	865.333	153	34.3187	5.144	-2.73803	6.42905e-61	9.47696e-60	yes	Ctns	186.333	818	9.68	36.891	1.93019	1.81391e-30	2.67611e-29	yes	Ppfia4	38.6667	211.333	0.899333	4.866	2.43581	7.10546e-14	9.79959e-13	yes
Cks2	30.3333	426.333	5.895	70.519	3.58045	7.62777e-61	1.12348e-59	yes	Bmf	116.667	598	3.763	15.035	1.99837	1.99931e-30	2.94723e-29	yes	Hapln4	89	274.333	2.77233	8.80267	1.66684	7.12947e-14	9.82524e-13	yes
Htr7	406.333	17.3333	18.426	0.688667	-4.74179	7.68549e-61	1.13106e-59	yes	Kif1a	22012.7	7671.67	411.525	118.81	-1.79233	2.00759e-30	2.9556e-29	yes	Reln	1120.33	2860.67	11.2087	29.046	1.37372	7.61593e-14	1.04797e-12	yes
Nek2	10.6667	405	0.443	14.366	5.01921	7.85165e-61	1.15458e-59	yes	Ddr1	2066	6394.33	95.76	263.202	1.45867	2.00825e-30	2.9556e-29	yes	Cebpb	819.667	366.333	62.0097	28.531	-1.11996	7.71471e-14	1.06076e-12	yes
Fgf14	457.667	31.6667	17.2043	1.03867	-4.04997	8.21474e-61	1.20699e-59	yes	Tram2	48.3333	459	1.009	8.244	3.03042	2.07921e-30	3.05755e-29	yes	Atp13a5	147.333	548.333	4.25767	14.629	1.7807	7.96766e-14	1.09471e-12	yes
Prcp	241	1561.33	11.793	65.7177	2.47835	8.95139e-61	1.31415e-59	yes	Ski	1250	4246	31.0173	91.9373	1.56758	2.23696e-30	3.28687e-29	yes	Sirt3	128.333	331	12.1753	29.991	1.30057	8.00266e-14	1.09868e-12	yes
Snap23	213.667	1197.33	11.9613	53.4227	2.15907	1.01395e-60	1.48738e-59	yes	Il1a	15.3333	239.333	1.04	14.197	3.77093	2.24963e-30	3.3028e-29	yes	Scn1b	573	1300	41.8727	97.4157	1.21815	8.04957e-14	1.10429e-12	yes
Lpl	103	1285	3.92767	44.2927	3.49532	1.23308e-60	1.80735e-59	yes	Chrnb2	1125.33	228.667	23.6623	4.281	-2.46657	2.52763e-30	3.70794e-29	yes	Fam83d	277.333	98.3333	13.9653	5.08633	-1.45715	8.19194e-14	1.12297e-12	yes
Nxph1	702	97	35.3583	4.14067	-3.09412	1.25092e-60	1.83201e-59	yes	Tekt5	390.333	39.6667	31.0307	2.91167	-3.41378	2.62801e-30	3.85207e-29	yes	Calhm6	11.3333	121.667	1.17967	12.804	3.44014	8.3042e-14	1.1375e-12	yes
Angpt2	76.6667	955.333	2.91733	30.6467	3.39301	1.28111e-60	1.87471e-59	yes	Sorcs3	359	56.6667	8.53533	1.18	-2.85466	2.64888e-30	3.87952e-29	yes	Neil3	107	15.3333	5.39667	0.804333	-2.7462	8.35744e-14	1.14393e-12	yes
Slc35f3	442	8.66667	22.864	0.401333	-5.83213	1.34895e-60	1.97238e-59	yes	Ezr	619.667	2276.33	26.5243	84.0973	1.66474	2.65103e-30	3.87954e-29	yes	Dtx3	525	1064.33	30.6223	64.49	1.07449	8.51921e-14	1.16519e-12	yes
Limk1	3502.67	667	141.65	24.2497	-2.5463	1.35927e-60	1.98587e-59	yes	Ier5	183.667	738	7.55333	26.3947	1.80506	2.96002e-30	4.32822e-29	yes	Lamc3	165.667	566	3.30467	11.2823	1.77149	9.06732e-14	1.23922e-12	yes
Atf1	124.667	889.667	9.26933	59.028	2.67086	1.6937e-60	2.47248e-59	yes	Smim13	3056.67	1050.67	91.711	27.5937	-1.73276	3.34407e-30	4.88584e-29	yes	Clec4e	331.667	61.3333	16.334	3.86333	-2.07996	9.09729e-14	1.24238e-12	yes
S1pr2	90.3333	1091	1.90067	19.809	3.38158	1.74246e-60	2.5416e-59	yes	Rtn1	6742	2197.67	590.43	139.234	-2.08426	3.37593e-30	4.92843e-29	yes	Asb13	135.667	338.667	3.47533	8.925	1.3607	9.19493e-14	1.25477e-12	yes
Fkbp10	139.333	2057.67	7.251	90.9933	3.64951	1.82336e-60	2.65746e-59	yes	Mr1	123.333	580	6.51767	26.0657	1.99972	3.58012e-30	5.2223e-29	yes	Galnt16	365.333	874.333	10.5633	26.0687	1.30325	9.31435e-14	1.27011e-12	yes
Lmtk2	2128.33	523	35.18	7.367	-2.25561	2.00176e-60	2.91512e-59	yes	Lypd6b	413	59	24.0537	3.03033	-2.98871	3.64872e-30	5.31809e-29	yes	Bora	158	37	7.583	1.70133	-2.1561	9.89967e-14	1.34689e-12	yes
Ifitm3	402.667	2893	80.2743	490.462	2.61113	2.34044e-60	3.4056e-59	yes	Gjd2	235.333	18.6667	10.9177	0.766	-3.83318	3.83852e-30	5.59023e-29	yes	Minar2	117.333	397.333	8.949	27.415	1.61517	1.00217e-13	1.36247e-12	yes
Kcnn2	447.667	11.3333	23.7973	0.400667	-5.89225	2.53377e-60	3.68395e-59	yes	Arfgef3	1689	358.667	15.6093	2.90433	-2.42613	3.86501e-30	5.62429e-29	yes	Ucma	1	104.333	0.142	14.6703	6.69087	1.01944e-13	1.38491e-12	yes
Cmtm5	1891.33	404.667	231.782	42.31	-2.4537	2.60067e-60	3.77818e-59	yes	Ndrg3	7090	2354.67	365.358	106.292	-1.78128	3.90234e-30	5.67406e-29	yes	Hmgcs2	317.667	1096.67	10.9973	39.207	1.83396	1.03332e-13	1.40271e-12	yes
Sh3glb1	2006.67	6127	74.839	249.545	1.73744	2.99661e-60	4.34989e-59	yes	Diras1	1794	434	82.1403	17.308	-2.24665	4.06876e-30	5.91129e-29	yes	Ecscr	587.667	259	64.1403	28.763	-1.15702	1.08248e-13	1.46726e-12	yes
Pcyt1b	1586	406	43.7	9.531	-2.19693	3.34441e-60	4.85087e-59	yes	Itpripl1	32	286.333	1.54	11.9567	2.95681	4.61452e-30	6.69881e-29	yes	Slc24a2	670.333	1403	7.98733	16.0073	1.00295	1.09039e-13	1.47688e-12	yes
Tnfaip3	68.6667	615.667	2.09733	18.7777	3.16239	3.47422e-60	5.03511e-59	yes	Ubxn2a	1284.33	364.333	72.4137	19.3367	-1.90492	4.86955e-30	7.06338e-29	yes	Heg1	3752	1770.33	58.6667	27.605	-1.08761	1.11651e-13	1.51112e-12	yes
Ppp1r14b	196	1352.33	26.9217	157.173	2.54551	3.95914e-60	5.73331e-59	yes	Lgals9	346.333	2107	30.728	161.14	2.39069	4.93029e-30	7.14576e-29	yes	Nkain2	363.333	845	11.583	26.5563	1.19705	1.15179e-13	1.55655e-12	yes
Trim30a	57.6667	665.667	2.05833	20.3237	3.30361	4.07214e-60	5.89223e-59	yes	Add2	3768	794.333	63.3107	11.831	-2.41988	5.02506e-30	7.2773e-29	yes	Ctsc	6758.33	3234.67	318.278	148.612	-1.09874	1.17793e-13	1.59069e-12	yes
Crmp1	1101.67	184.667	51.904	7.162	-2.85741	4.20898e-60	6.08535e-59	yes	Pira12	5	231.667	0.316333	12.647	5.32121	5.44623e-30	7.88093e-29	yes	Rbfox3	27.3333	165.333	1.44633	8.44733	2.5461	1.38772e-13	1.86981e-12	yes
Mmp19	61.3333	1013	2.96867	37.9767	3.67723	4.78164e-60	6.90779e-59	yes	Plod1	1108	3258.67	47.5133	120.295	1.34018	5.66835e-30	8.19581e-29	yes	Icam2	227.333	66	23.2707	6.93767	-1.74599	1.42508e-13	1.9173e-12	yes
Stum	757.667	50.6667	18.1337	1.01333	-4.16149	5.97879e-60	8.63035e-59	yes	Csrnp3	1216.67	185.667	16.497	2.064	-2.99869	6.07531e-30	8.77722e-29	yes	Amph	243	537.333	8.48733	19.3733	1.19069	1.49333e-13	2.00764e-12	yes
Gpsm3	54.6667	580.667	5.65233	50.6867	3.16469	5.99244e-60	8.64316e-59	yes	Baz1a	37.6667	315	1.08933	6.862	2.65518	6.09237e-30	8.79486e-29	yes	Adcy4	259.667	85.6667	10.0247	4.50867	-1.15278	1.49664e-13	2.00965e-12	yes
Map9	827	109.333	18.0027	2.34833	-2.9385	6.93626e-60	9.99651e-59	yes	Ninj1	315.667	1509.33	36.22	149.073	2.04116	6.21964e-30	8.97144e-29	yes	D430041D05Rik	93.3333	272.333	0.957	2.91233	1.60558	1.55012e-13	2.07936e-12	yes
Glmp	770	3442	84.502	338.454	2.0019	7.47804e-60	1.07687e-58	yes	Psd4	47.3333	370	2.006	11.484	2.51723	6.31578e-30	9.10286e-29	yes	Acsf2	470.667	941.333	17.026	34.9173	1.0362	1.58213e-13	2.12073e-12	yes
Spire2	579.333	51	33.366	2.573	-3.69686	7.68775e-60	1.10619e-58	yes	Myl12a	403	1632.67	52.4427	198.477	1.92016	6.54273e-30	9.42246e-29	yes	Caln1	39	202.667	0.513333	3.38133	2.71962	1.62639e-13	2.17684e-12	yes
Neurl3	24.6667	526.667	1.324	23.621	4.1571	8.15547e-60	1.17256e-58	yes	Aim2	25	256	2.016	16.0737	2.99513	6.90008e-30	9.9292e-29	yes	Bmf	246.667	598	6.51	15.035	1.2076	1.66269e-13	2.22379e-12	yes
B3gat1	1349.33	218	51.256	6.845	-2.9046	1.05532e-59	1.51609e-58	yes	Cdkn2b	18	216.333	1.746	18.2723	3.38754	7.10367e-30	1.02141e-28	yes	Fgd5	476	192.333	9.16733	3.842	-1.25464	1.77662e-13	2.37442e-12	yes
Ndst4	425	13.6667	7.884	0.494667	-3.9944	1.13182e-59	1.6247e-58	yes	Cdh18	347	36.3333	17.8607	1.64433	-3.44121	7.83109e-30	1.12421e-28	yes	Slc1a1	192.667	451	5.80967	13.9237	1.26101	1.83593e-13	2.44827e-12	yes
Zfyve28	666.333	56.6667	24.2483	1.638	-3.88788	1.29444e-59	1.85666e-58	yes	Vkorc1	279.333	939.333	50.12	147.364	1.55593	8.43461e-30	1.2099e-28	yes	Bckdha	470	1067.67	28.0557	65.8123	1.23007	1.9874e-13	2.64637e-12	yes
Emcn	146.333	980.667	11.1587	66.6803	2.5791	1.37276e-59	1.96744e-58	yes	Drd2	267.667	31.6667	14.1503	1.456	-3.28075	8.68074e-30	1.24422e-28	yes	Tmem151b	39	172	0.921333	4.18433	2.1832	2.04819e-13	2.72531e-12	yes
Col11a1	96.3333	1373.33	1.916	21.0363	3.45671	1.43588e-59	2.05627e-58	yes	Atp2a2	13648.7	5425	336.094	129.706	-1.37362	8.91329e-30	1.27654e-28	yes	Snhg11	57.3333	235.333	1.11833	4.74533	2.08516	2.08586e-13	2.77325e-12	yes
Efna3	506	30.6667	31.7047	1.55867	-4.34631	1.46477e-59	2.09599e-58	yes	Dpp7	306.333	1253	24.793	87.1323	1.81328	9.10985e-30	1.30326e-28	yes	Golga7b	30.6667	155	1.227	6.448	2.39372	2.14065e-13	2.84001e-12	yes
Ecscr	55.3333	587.667	7.179	64.1403	3.15938	1.84794e-59	2.64218e-58	yes	Mxd4	919	2839.67	32.4187	87.648	1.4349	9.11425e-30	1.30326e-28	yes	Tmem25	30.6667	170	2.86633	9.578	1.74052	2.15439e-13	2.85406e-12	yes
Shisa9	467.667	25.6667	14.8813	0.685333	-4.44055	1.87639e-59	2.68075e-58	yes	Alox5ap	94	696.667	11.4663	71.476	2.64005	9.55868e-30	1.36573e-28	yes	Ephx1	1093	2485.33	81.0797	176.219	1.11996	2.17557e-13	2.87791e-12	yes
Hcn2	6020	1331	251.916	47.5023	-2.40687	2.16563e-59	3.09153e-58	yes	Wasf2	642.333	2479.67	19.543	62.732	1.68255	9.59604e-30	1.36999e-28	yes	C1qtnf2	112.667	321.667	11.8217	33.1463	1.48742	2.17947e-13	2.88096e-12	yes
Ulbp1	10	473.333	0.245667	11.7313	5.57752	2.17544e-59	3.10308e-58	yes	Erbb4	953.667	279.333	11.8697	2.80267	-2.08241	9.70565e-30	1.38455e-28	yes	Slc2a12	189.667	435.333	5.201	12.2347	1.23411	2.20532e-13	2.91302e-12	yes
Pcp4l1	3626.67	432	308.511	30.9193	-3.31874	2.42897e-59	3.462e-58	yes	Trim56	186.333	778	3.672	12.3943	1.75504	9.88584e-30	1.40914e-28	yes	B3gnt3	384	68.6667	14.1543	2.59267	-2.44874	2.21681e-13	2.92606e-12	yes
Filip1l	73.6667	615.333	2.97333	21.671	2.86561	2.73725e-59	3.89832e-58	yes	Xk	451.667	82	11.9733	1.907	-2.65045	1.11749e-29	1.59163e-28	yes	Rxrg	23.6667	129.667	1.55	8.747	2.49652	2.24174e-13	2.95681e-12	yes
Tunar	428	13.3333	17.8597	0.467	-5.25714	3.40394e-59	4.84399e-58	yes	Bach1	286.667	1074	6.57633	21.463	1.7065	1.12838e-29	1.60589e-28	yes	Adamts15	265.667	886	5.09233	17.87	1.81114	2.29051e-13	3.01894e-12	yes
Actr3	2940.67	8863	157.443	398.39	1.33935	3.41312e-59	4.85323e-58	yes	Inpp5f	2719.67	973.333	106.956	32.0103	-1.74041	1.13922e-29	1.62003e-28	yes	Nos3	512	165	14.1043	4.65033	-1.60073	2.38153e-13	3.13436e-12	yes
Tead2	33.6667	559.667	2.107	30.176	3.84014	3.63087e-59	5.1588e-58	yes	Adamts1	311	1283.67	9.85033	32.9603	1.74249	1.21585e-29	1.72765e-28	yes	Mex3a	328.667	128.667	6.50267	2.61767	-1.31275	2.4114e-13	3.17137e-12	yes
Cd22	7	539	0.349	22.5283	6.01237	3.73215e-59	5.29854e-58	yes	Nfkbiz	46	375.667	1.687	12.073	2.83925	1.21834e-29	1.72983e-28	yes	Tafa5	535.333	1089	23.1583	48.6217	1.07007	2.53537e-13	3.32958e-12	yes
Tbc1d1	379	1488	9.33633	34.5413	1.8874	4.22438e-59	5.99266e-58	yes	Lix1l	504	1514.33	20.4267	53.514	1.38946	1.27566e-29	1.8098e-28	yes	Gja4	356	103.667	23.9753	7.15367	-1.7448	2.55182e-13	3.34876e-12	yes
Pgm2	156.667	929.667	8.91633	45.1343	2.3397	4.37259e-59	6.19805e-58	yes	Yap1	429.333	1303.33	14.0363	37.2247	1.40709	1.56436e-29	2.21765e-28	yes	Ephb6	302.667	664.667	9.15433	21.0767	1.20312	2.56592e-13	3.36483e-12	yes
Sec61a1	967.667	5381	41.0007	193.177	2.2362	4.75112e-59	6.72932e-58	yes	Ugt1a6a	15.3333	290.333	0.906	14.8047	4.0304	1.64008e-29	2.32318e-28	yes	Gm973	28.6667	151	1.774	10.2937	2.53668	2.59018e-13	3.39419e-12	yes
Lrrc75b	1008	164	29.4	4.086	-2.84706	5.29166e-59	7.48906e-58	yes	Gabra1	961.333	156.333	32.277	4.58733	-2.81478	1.64561e-29	2.32919e-28	yes	Dpysl4	50	179	2.01733	7.47567	1.88975	2.65145e-13	3.47196e-12	yes
Plod1	1108	3458.67	47.5133	125.196	1.39778	5.33846e-59	7.5494e-58	yes	Necab3	691.667	101.667	51.996	6.588	-2.98049	1.65081e-29	2.33471e-28	yes	Cdkn1c	361.333	857	25.8907	62.9653	1.28213	2.68728e-13	3.51634e-12	yes
Tlcd4	790.333	110.667	16.6353	2.14733	-2.95363	6.86856e-59	9.70559e-58	yes	Zc3h12a	15.6667	233	0.772333	9.87367	3.67629	1.67477e-29	2.36676e-28	yes	Vav3	448.333	158	10.6237	4.144	-1.35819	2.77896e-13	3.63369e-12	yes
Ebf3	1059.33	55.3333	32.7093	1.43567	-4.50991	7.42978e-59	1.04904e-57	yes	Elapor1	295	37	7.191	0.763667	-3.23518	1.69842e-29	2.3983e-28	yes	Cirbp	241.667	741.667	21.3667	68.3143	1.67683	2.81465e-13	3.6777e-12	yes
Pla2g15	256.333	1462	12.8637	61.743	2.26297	7.62044e-59	1.07512e-57	yes	S100a6	656.667	3950.33	124.752	659.128	2.4015	1.88834e-29	2.66441e-28	yes	Slc18a3	22	136	1.05833	6.59767	2.64016	2.92223e-13	3.81278e-12	yes
Mcf2	418.333	12	15.2473	0.371667	-5.3584	1.32935e-58	1.87404e-57	yes	Crtac1	1042	297.667	61.0773	16.1263	-1.92122	1.93617e-29	2.72978e-28	yes	Art3	154	371.333	14.1657	34.436	1.28152	2.94791e-13	3.84351e-12	yes
Snx5	1599	6500.33	87.557	298.411	1.76901	1.81626e-58	2.55846e-57	yes	Plcb2	47.3333	421	1.28867	10.0183	2.95869	1.97301e-29	2.77955e-28	yes	Raver2	109	291	3.09333	8.45233	1.45019	2.96814e-13	3.86711e-12	yes
Nrxn2	3087.33	692.333	95.15	19.0623	-2.31948	2.76227e-58	3.88803e-57	yes	Fgd2	46.6667	345	2.374	16.985	2.83887	2.08906e-29	2.94075e-28	yes	Fanci	272.667	85.3333	6.71033	2.15833	-1.63647	3.34873e-13	4.35984e-12	yes
Fbxo2	2185	333.333	226.108	29.6147	-2.93263	2.77092e-58	3.89717e-57	yes	Tecr	7256	2718.33	865.314	282.795	-1.61347	2.1098e-29	2.96765e-28	yes	Mapre3	406	841.667	24.2307	51.455	1.08648	3.37166e-13	4.38654e-12	yes
Clcn6	2450.67	647	76.5757	16.4097	-2.22234	2.79609e-58	3.92951e-57	yes	Tpcn2	36.6667	355	1.86	14.0927	2.92157	2.15246e-29	3.0253e-28	yes	Eya1	96.6667	268.667	3.00233	8.52667	1.5059	3.37644e-13	4.38961e-12	yes
Pcsk1	524.667	38.6667	14.0243	0.874	-4.00416	2.8036e-58	3.93701e-57	yes	Samsn1	33.3333	276	2.398	17.183	2.84108	2.2728e-29	3.19196e-28	yes	Pcnx2	32.3333	147	0.521667	2.396	2.19943	3.44542e-13	4.47608e-12	yes
Acsbg1	5405	855	253.851	34.8153	-2.86619	2.92354e-58	4.10225e-57	yes	Xlr	19.6667	226	2.59933	26.1437	3.33025	2.35867e-29	3.30999e-28	yes	Gpr37	895.333	1945.67	21.4527	47.4963	1.14666	3.47747e-13	4.51448e-12	yes
Tep1	182	999.333	3.015	14.3487	2.25069	3.00314e-58	4.21068e-57	yes	Ppp2r2b	1730.33	433.333	109.366	23.6073	-2.21186	2.46241e-29	3.4529e-28	yes	Rimbp2	25.3333	137.333	1.64733	4.839	1.55458	3.52059e-13	4.5672e-12	yes
Csdc2	2870	580.667	155.97	26.6427	-2.54946	3.14844e-58	4.41098e-57	yes	Tmcc2	3682.67	1222	146.614	43.3937	-1.75646	2.48637e-29	3.4838e-28	yes	Snrpa1	668.667	305	62.6043	29.7377	-1.07397	3.52794e-13	4.57347e-12	yes
Myo1g	20	449	0.973	15.827	4.0238	3.64067e-58	5.09666e-57	yes	Col20a1	25.6667	260.333	0.720333	6.90567	3.26104	2.63298e-29	3.68638e-28	yes	Serpinb6b	456.667	199.667	25.3837	11.8107	-1.10381	3.53369e-13	4.57764e-12	yes
Map2k3	163.667	1044	9.98433	54.116	2.43832	3.90213e-58	5.45845e-57	yes	Epb41l2	2372	5935.67	85.5967	180.298	1.07475	2.74003e-29	3.83329e-28	yes	Hspa5	15478	7307	679.418	329.257	-1.04509	3.55792e-13	4.60574e-12	yes
Kntc1	24	406	0.926333	6.80133	2.87621	4.08767e-58	5.71357e-57	yes	Manba	169	828.333	6.31433	26.3813	2.06282	2.81897e-29	3.93933e-28	yes	Ppp2r2c	880.667	1934.33	24.7637	55.648	1.1681	3.66776e-13	4.74454e-12	yes
Xdh	173.333	2400.33	5.16267	59.4813	3.52625	4.57331e-58	6.38745e-57	yes	Dscam	924	250.333	20.233	5.09833	-1.98861	2.82018e-29	3.93933e-28	yes	Zfp469	1046.33	416.667	9.812	4.38	-1.16362	3.85343e-13	4.97408e-12	yes
Hycc2	1422.33	264.333	23.4883	3.649	-2.68637	4.67219e-58	6.52051e-57	yes	Slc16a10	33.3333	324.333	1.401	7.446	2.41001	2.97234e-29	4.14867e-28	yes	Extl1	23.3333	119.667	0.640333	3.407	2.41161	3.97516e-13	5.12756e-12	yes
Lmo3	521	22.6667	28.7133	1.222	-4.5544	4.73319e-58	6.60056e-57	yes	Sav1	167	685.667	8.90467	31.8177	1.83719	3.0081e-29	4.19536e-28	yes	Casp8	1164.33	580	67.554	33.5147	-1.01125	3.9826e-13	5.1335e-12	yes
Prmt8	371.667	14.6667	18.3177	0.614667	-4.89729	4.93552e-58	6.87741e-57	yes	Rps12	2046.33	5974.33	470.292	1203.16	1.3552	3.08917e-29	4.30512e-28	yes	Col25a1	37.6667	161.333	0.774667	3.138	2.0182	4.27424e-13	5.4938e-12	yes
Abtb3	859	146.667	26.562	3.73533	-2.83005	5.45613e-58	7.597e-57	yes	Mamdc2	81.3333	500.333	3.23667	17.2203	2.41153	3.19684e-29	4.45174e-28	yes	Akr1b8	1096.67	464.333	91.4837	40.2107	-1.18594	4.34494e-13	5.58073e-12	yes
Ifnar2	368	1675.67	35.048	129.11	1.8812	5.54354e-58	7.71277e-57	yes	Zfp217	56.3333	368.333	1.331	7.60733	2.51488	3.3558e-29	4.66951e-28	yes	E2f1	427.667	176	17.755	7.49567	-1.2441	4.37772e-13	5.61487e-12	yes
Nusap1	34.6667	547.667	1.45633	20.886	3.84212	5.81105e-58	8.07874e-57	yes	Rasl10b	1959.67	539.667	88.555	20.8267	-2.08814	3.40582e-29	4.73548e-28	yes	Anxa8	197.667	53.6667	11.972	3.345	-1.83959	4.41515e-13	5.65888e-12	yes
Diaph1	609.333	2182.33	14.605	44.355	1.60263	6.41259e-58	8.90819e-57	yes	Cacna2d3	988.667	219	36.6357	8.073	-2.18207	3.47768e-29	4.83169e-28	yes	Flywch1	844.667	1557.67	43.467	87.0483	1.0019	4.56179e-13	5.83446e-12	yes
Ncoa7	1500	361.333	60.056	10.706	-2.48789	6.63282e-58	9.20704e-57	yes	Ankrd34a	365.333	59.6667	18.9213	2.703	-2.80738	3.55582e-29	4.93646e-28	yes	Nup43	221	74	19.689	6.77133	-1.53988	4.72299e-13	6.03637e-12	yes
Tifab	68	588	3.203	23.9997	2.90552	7.17447e-58	9.95128e-57	yes	Gvin2	100	621.333	1.93367	8.74633	2.17734	3.57694e-29	4.96197e-28	yes	Lipa	9036.67	4206.33	347.396	165.466	-1.07005	4.88801e-13	6.24288e-12	yes
Stard10	1013.33	165	102.93	14.7127	-2.80653	7.64733e-58	1.0599e-56	yes	Car10	1023	194.667	42.1233	7.03667	-2.58166	4.16129e-29	5.76818e-28	yes	Larp6	226.667	518.667	10.6637	24.84	1.21996	5.13311e-13	6.5467e-12	yes
Pmepa1	904	3883	34.833	147.606	2.08323	9.2026e-58	1.27448e-56	yes	Apc2	2627	830	50.0513	14.0983	-1.82788	4.21918e-29	5.84396e-28	yes	Sostdc1	106.667	312.667	6.896	20.4797	1.57036	5.1823e-13	6.6048e-12	yes
Tnfrsf1a	332	2713.33	21.3527	143.896	2.75253	9.3965e-58	1.30034e-56	yes	Enpp5	4612.67	1880.33	218.661	82.8317	-1.40044	4.60388e-29	6.37193e-28	yes	Sfrp5	87.6667	274.667	5.29433	16.951	1.67885	5.23525e-13	6.6571e-12	yes
Cntn2	6056.67	1659	116.38	27.6023	-2.07598	1.06776e-57	1.47649e-56	yes	Htr2b	3.33333	220	0.214667	13.384	5.96227	4.62487e-29	6.39609e-28	yes	Cd300lf	1237	484.333	76.314	30.689	-1.31423	5.34913e-13	6.78879e-12	yes
Phactr3	988.667	144	50.089	6.61233	-2.92126	1.07335e-57	1.48309e-56	yes	Clec4a3	12.6667	257.667	1.868	23.7943	3.67105	4.70388e-29	6.50039e-28	yes	Nrxn3	91.6667	294	1.551	5.494	1.82466	5.56778e-13	7.05148e-12	yes
Spc25	10.6667	447.667	1.037	37.6813	5.18336	1.13943e-57	1.5732e-56	yes	Casp4	10.3333	192	1.06	17.5923	4.05281	4.72291e-29	6.52172e-28	yes	Hcar1	24	151.667	0.853333	5.37933	2.65625	6.15622e-13	7.79129e-12	yes
Vcl	654.333	3409.33	16.7153	74.1747	2.14975	1.15865e-57	1.59852e-56	yes	Unc5d	290.667	38.3333	4.82567	0.563	-3.09952	4.80392e-29	6.62853e-28	yes	Npnt	303.333	612.667	7.89567	16.9623	1.1032	6.6474e-13	8.4012e-12	yes
Ms4a6b	21	595	1.38333	37.6027	4.76461	1.3402e-57	1.84758e-56	yes	Ppip5k1	1383	470.333	38.4413	13.204	-1.54168	4.87795e-29	6.72556e-28	yes	Opcml	167	390.667	3.028	7.12833	1.2352	7.09431e-13	8.93489e-12	yes
Me3	592.333	66.3333	17.6927	1.701	-3.3787	1.41525e-57	1.94956e-56	yes	Map3k13	496.333	107.333	7.76233	1.471	-2.39969	5.38984e-29	7.42568e-28	yes	Drc7	6.33333	74	0.251667	3.053	3.60064	7.21006e-13	9.07437e-12	yes
Ybx3	531.333	2713.67	41.1247	179.158	2.12316	2.10486e-57	2.89731e-56	yes	Il3ra	11.3333	192.667	1.22733	16.568	3.7548	5.54085e-29	7.62793e-28	yes	Osr1	303.667	714.333	17.2757	41.5677	1.26672	7.48636e-13	9.41558e-12	yes
Npc2	2926.67	10419	119.008	360.083	1.59727	2.28457e-57	3.14228e-56	yes	Ckap4	378.667	1458.33	16.4543	55.0963	1.74349	5.72263e-29	7.8722e-28	yes	Esam	918.333	345	57.04	22.2307	-1.35942	7.58877e-13	9.53776e-12	yes
Incenp	149.667	983.333	6.91467	38.3677	2.47216	2.42676e-57	3.33532e-56	yes	Plcb1	1051	308	19.9993	5.11767	-1.96639	5.87021e-29	8.06909e-28	yes	Lpl	1285	2990	44.2927	100.261	1.17863	7.67088e-13	9.62762e-12	yes
Oaf	84.6667	855.333	6.637	58.509	3.14006	2.51847e-57	3.45873e-56	yes	Lrrtm3	375.333	67.6667	12.932	2.04533	-2.66054	5.93946e-29	8.15809e-28	yes	Mal	4347.33	9212.33	180.209	387.929	1.10612	8.08742e-13	1.01364e-11	yes
Myc	56.3333	504.667	3.931	27.3683	2.79954	2.76597e-57	3.79576e-56	yes	Tgm2	669.667	3706.67	25.2093	120.019	2.25123	5.98149e-29	8.20959e-28	yes	Msln	723	249.333	38.749	13.898	-1.47928	8.30555e-13	1.03882e-11	yes
Ralb	359.667	1492.67	21.2187	74.7787	1.81729	2.94311e-57	4.03578e-56	yes	Fbln2	212.333	1607.33	6.14667	40.0387	2.70352	6.02604e-29	8.26448e-28	yes	Sv2b	105.333	392.667	2.24167	8.626	1.94412	8.45268e-13	1.0565e-11	yes
Flnb	624.333	4209	9.25167	52.8997	2.51547	2.94546e-57	4.03595e-56	yes	Cdk6	44.3333	337	0.58	4.15467	2.84061	7.05207e-29	9.66432e-28	yes	Chchd10	344	774	40.3203	93.5533	1.21428	8.49735e-13	1.06135e-11	yes
Surf4	1360	6540.33	55.955	228.626	2.03065	3.01924e-57	4.13391e-56	yes	Sod2	3848.33	1478	90.6203	30.9737	-1.54879	7.40405e-29	1.0139e-27	yes	Tppp3	1246.33	3246	130.693	348.046	1.41309	9.39997e-13	1.17167e-11	yes
Arhgef1	367	1498.33	14.833	53.3547	1.8468	3.14981e-57	4.30942e-56	yes	Fzd1	302.333	1407.33	9.745	39.138	2.00584	8.00225e-29	1.09499e-27	yes	Axl	5309.67	10951.7	146.466	307.598	1.07048	9.58418e-13	1.19381e-11	yes
Tnfaip8	121.333	911.333	8.86633	58.3553	2.71846	3.71358e-57	5.07692e-56	yes	Grid1	714.667	194	16.7587	3.97367	-2.07636	8.05007e-29	1.1007e-27	yes	Car10	42	194.667	1.45967	7.03667	2.26925	9.96299e-13	1.23944e-11	yes
Kcnj16	1508	143	54.9247	4.42067	-3.63512	3.73939e-57	5.10834e-56	yes	Trim30a	57.6667	423.667	2.05833	13.0663	2.66631	8.43256e-29	1.15213e-27	yes	Als2cl	217.667	498.667	5.21833	11.4807	1.13755	1.07077e-12	1.3301e-11	yes
Tlr4	41	695	1.34367	19.4123	3.85273	4.46261e-57	6.09172e-56	yes	Coro1a	520.667	1690.67	46.6753	121.268	1.37747	8.75598e-29	1.19542e-27	yes	Ammecr1	453.333	186.667	9.54067	4.03667	-1.24093	1.08059e-12	1.34138e-11	yes
Ar	382.667	21.3333	5.12333	0.241333	-4.40798	4.70376e-57	6.41605e-56	yes	Egr1	358.667	1425.67	10.667	37.454	1.81197	9.53482e-29	1.30077e-27	yes	Galnt9	71.6667	282.667	3.762	14.1053	1.90667	1.09394e-12	1.35702e-11	yes
Nras	837.667	3149.33	30.2213	109.862	1.86206	4.97569e-57	6.78187e-56	yes	Rab7b	140.333	879	8.00367	44.188	2.46492	9.80879e-29	1.33714e-27	yes	Gabra1	28	156.333	0.834667	4.58733	2.45838	1.15003e-12	1.42563e-11	yes
Nptx1	2603	306.333	67.12	6.62733	-3.34024	5.13564e-57	6.9946e-56	yes	Trhr	254.333	25	9.662	0.827	-3.54636	1.00225e-28	1.36525e-27	yes	Hoxb8	166	436.333	8.04733	23.166	1.52543	1.16325e-12	1.44103e-11	yes
Clstn1	13023	2211.33	413.28	59.2277	-2.80278	5.26906e-57	7.17092e-56	yes	Ppp1r3b	53.6667	461.333	1.65433	12.4347	2.91005	1.00627e-28	1.36969e-27	yes	Prrt2	115.333	340.333	5.46233	16.6813	1.61065	1.17365e-12	1.45293e-11	yes
Tspyl5	612	59.3333	20.4863	1.696	-3.59445	5.58416e-57	7.59403e-56	yes	Rundc3b	473.333	107	19.526	3.70933	-2.39616	1.03032e-28	1.40137e-27	yes	Tmem44	129.667	351.333	5.23033	14.186	1.43949	1.18553e-12	1.46463e-11	yes
Clvs2	415	8.33333	20.435	0.350333	-5.86617	5.58943e-57	7.59549e-56	yes	Prss23	237.667	1327.67	16.8863	83.4823	2.30561	1.06613e-28	1.44899e-27	yes	Orc6	434	181	38.4787	16.499	-1.22168	1.3178e-12	1.62583e-11	yes
Uggt1	947.333	3258	19.561	63.43	1.69719	5.85399e-57	7.94904e-56	yes	Ryr3	244.333	29.6667	2.134	0.230667	-3.20968	1.08369e-28	1.47176e-27	yes	Nop58	818.333	383	81.6923	32.9563	-1.30964	1.41374e-12	1.74183e-11	yes
Smim10l2a	447.333	18.6667	25.1213	0.907	-4.79167	6.25715e-57	8.49011e-56	yes	Pcdh7	2011	685.333	35.5227	11.1627	-1.67006	1.13815e-28	1.54456e-27	yes	Syt13	482.667	162.333	14.5213	5.051	-1.52353	1.46817e-12	1.80469e-11	yes
Pdk2	2278.33	362.667	135.438	18.365	-2.88261	7.56548e-57	1.02576e-55	yes	Sntg1	304.333	35.6667	12.0803	1.252	-3.27035	1.19051e-28	1.61441e-27	yes	Cdca4	561	251	30.8487	13.9783	-1.14202	1.46875e-12	1.80469e-11	yes
Plcd4	650.667	67	31.567	2.71633	-3.53868	7.72492e-57	1.0466e-55	yes	Rarres2	179.333	981.667	32.5973	153.65	2.23682	1.21038e-28	1.64013e-27	yes	Fblim1	2059	918.667	95.6463	44.1673	-1.11473	1.47005e-12	1.80506e-11	yes
Ric1	393.667	1524.67	8.84833	31.584	1.83572	7.78754e-57	1.05429e-55	yes	Arhgef1	367	1232.33	14.833	43.3927	1.54864	1.27059e-28	1.72042e-27	yes	Mib2	291.667	605.667	12.5603	25.5947	1.02697	1.57739e-12	1.93425e-11	yes
Ticam2	18.3333	408.667	0.590667	11.1707	4.24123	8.57281e-57	1.15973e-55	yes	Nupr1	162	1289	26.9147	185.085	2.78172	1.29533e-28	1.75261e-27	yes	Cep170b	442.333	876	7.88733	16.3033	1.04756	1.61942e-12	1.98445e-11	yes
Aspm	15.3333	478.667	0.209667	5.54867	4.72597	9.1261e-57	1.23366e-55	yes	Angpt1	167	728.333	5.293	20.0863	1.92406	1.35225e-28	1.82826e-27	yes	Tedc1	174	51.3333	6.81133	2.05967	-1.72553	1.63017e-12	1.99628e-11	yes
Plekhd1	418.667	12.6667	15.963	0.405	-5.30067	9.38083e-57	1.26715e-55	yes	Stip1	5214	1993.33	331.519	110.949	-1.57919	1.37897e-28	1.86299e-27	yes	Mxd3	118	26.3333	10.1563	2.32267	-2.12853	1.64056e-12	2.00764e-11	yes
Apoe	25537	119623	2449.46	9779.44	1.99729	9.50242e-57	1.28261e-55	yes	Ccr5	118.333	674	4.70033	15.554	1.72645	1.42935e-28	1.92962e-27	yes	Rarres1	57.6667	198.333	4.963	17.5217	1.81986	1.64639e-12	2.01341e-11	yes
Strip2	465	28	11.6617	0.595	-4.29274	9.56275e-57	1.28979e-55	yes	Pdgfb	129.667	551	6.182	22.2057	1.84478	1.44393e-28	1.94786e-27	yes	Cyyr1	573.333	230	11.971	4.92333	-1.28184	1.67349e-12	2.0438e-11	yes
Epm2aip1	3285	973	62.0057	15.949	-1.95893	9.78654e-57	1.31899e-55	yes	Mcm3	75.6667	427.667	3.34367	16.492	2.30226	1.45066e-28	1.95548e-27	yes	Nedd1	459.333	212.333	14.842	7.05733	-1.07249	1.71354e-12	2.0913e-11	yes
Rgs1	4.33333	597	0.344667	44.9127	7.02578	1.01952e-56	1.37305e-55	yes	Trim25	172.333	947.333	4.159	19.7247	2.24569	1.86806e-28	2.51626e-27	yes	Frmpd3	17.6667	106.667	0.279	1.71467	2.61959	1.73582e-12	2.11423e-11	yes
Nasp	218.333	1111.33	13.3863	59.993	2.16403	1.10159e-56	1.48248e-55	yes	Cd302	187.333	883	18.5577	76.5337	2.04408	1.90434e-28	2.56322e-27	yes	Lrp1b	103.667	280.667	1.53733	5.29567	1.78438	1.76006e-12	2.14087e-11	yes
Mdh1	14299.7	3259.67	1252.92	228.674	-2.45393	1.13283e-56	1.52339e-55	yes	Tmem154	19.6667	262.333	0.806	9.15367	3.5055	1.98511e-28	2.66995e-27	yes	Slc10a4	7.66667	79	0.509667	5.474	3.42497	1.77481e-12	2.15737e-11	yes
Apobr	31.3333	462	1.24433	15.4723	3.63625	1.19306e-56	1.60319e-55	yes	Rtn2	1324.33	303.333	102.683	25.1647	-2.02873	2.04834e-28	2.75295e-27	yes	Stoml1	158	388	9.728	24.5297	1.33431	1.79327e-12	2.17834e-11	yes
Csf1	785.667	3760.33	28.2513	116.747	2.047	1.29479e-56	1.7386e-55	yes	Slfn8	23	275.667	0.881667	8.86533	3.32987	2.18653e-28	2.9365e-27	yes	Clcf1	252	68.3333	15.454	4.32867	-1.83599	1.82125e-12	2.20938e-11	yes
Actb	14273.3	57637	1024.76	3468.54	1.75905	1.37558e-56	1.8457e-55	yes	Rab11fip4	4354	1565	90.8093	30.98	-1.5515	2.34603e-28	3.14838e-27	yes	Atp2a3	531.667	175.333	13.2503	4.45333	-1.57307	1.86095e-12	2.25301e-11	yes
Rgs7	590.667	55.3333	40.8397	3.64	-3.48796	1.51622e-56	2.03291e-55	yes	Psme2	380.667	1458.33	60.6263	181.359	1.58083	2.37415e-28	3.18375e-27	yes	B4galt1	3196.67	1557.33	91.5977	45.617	-1.00574	1.94119e-12	2.34547e-11	yes
Gucy1b1	1119	243	46.697	8.63	-2.4359	1.62614e-56	2.17866e-55	yes	Limd1	316	1122.33	8.779	27.038	1.62286	2.42423e-28	3.24851e-27	yes	Gbp5	127.667	545.333	4.76833	20.413	2.09793	2.00814e-12	2.42152e-11	yes
Ostf1	368.667	2078.67	41.996	208.464	2.31148	1.8879e-56	2.5275e-55	yes	Scn1b	3954.33	1300	338.865	97.4157	-1.79848	2.43263e-28	3.25735e-27	yes	Tnfrsf10b	213.333	66	7.613	2.43867	-1.64237	2.09768e-12	2.52781e-11	yes
Abhd8	1995	391.667	134.847	22.5817	-2.5781	1.91046e-56	2.5558e-55	yes	Cadm2	2346	923.667	50.516	21.5097	-1.23176	2.43444e-28	3.25737e-27	yes	Endou	6.33333	68.6667	0.408333	3.47933	3.09099	2.12076e-12	2.55392e-11	yes
Bcl2l11	108.667	713.667	3.00867	18.272	2.60244	2.06828e-56	2.76489e-55	yes	Hapln1	320.333	42.3333	7.50433	0.874667	-3.10092	2.52745e-28	3.37933e-27	yes	Prkcq	159.667	393	5.115	12.8993	1.33449	2.13115e-12	2.56474e-11	yes
Fgf11	695	81.3333	31.0377	3.15067	-3.30029	2.13005e-56	2.84536e-55	yes	Siglec1	52.3333	2366.33	1.12333	43.1823	5.26458	2.55508e-28	3.41374e-27	yes	Magee1	410.667	841	13.2063	27.814	1.07458	2.19466e-12	2.63941e-11	yes
Rab20	21	437.333	2.031	35.8043	4.13987	2.16507e-56	2.89001e-55	yes	Ltbp3	837.667	3142.67	27.7673	93.825	1.75658	2.5631e-28	3.42194e-27	yes	Tmem273	402.667	160.667	38.578	15.616	-1.30475	2.27989e-12	2.73647e-11	yes
Htr2b	3.33333	706.333	0.214667	42.2007	7.61902	2.24774e-56	2.99814e-55	yes	Camk1g	547	73.3333	30.144	3.49867	-3.10699	2.57763e-28	3.43881e-27	yes	Alox5ap	1742.33	696.667	165.654	71.476	-1.21264	2.30038e-12	2.75924e-11	yes
Aff1	434	1738.33	7.01633	24.0633	1.77805	3.41788e-56	4.55558e-55	yes	Septin11	671.333	2283.33	22.7633	63.1873	1.47292	2.63212e-28	3.50892e-27	yes	Serpina1b	298	829	24.4883	69.289	1.50053	2.3021e-12	2.75948e-11	yes
Tom1l2	5711	1031.67	165.62	25.8287	-2.68083	3.54478e-56	4.72124e-55	yes	Hcar2	24.6667	237	1.70233	14.4403	3.08452	2.96868e-28	3.95467e-27	yes	Vstm4	526.333	1179.33	21.8023	50.1767	1.20253	2.34547e-12	2.80776e-11	yes
Trim25	172.333	1566	4.159	34.412	3.0486	3.6276e-56	4.828e-55	yes	Gbp5	62.3333	545.333	2.68533	20.413	2.92632	3.01956e-28	4.0195e-27	yes	Bard1	137	31.6667	2.76433	0.654667	-2.0781	2.42789e-12	2.9044e-11	yes
Slc25a24	93.3333	1251.33	3.71067	41.981	3.49999	3.67236e-56	4.88397e-55	yes	Chic1	1001	299.333	18.2797	4.77967	-1.93526	3.30409e-28	4.39503e-27	yes	Oip5	109.667	14.6667	11.6487	1.596	-2.86763	2.48794e-12	2.97046e-11	yes
Dner	2556.67	449.333	95.0397	14.027	-2.76032	4.3293e-56	5.75341e-55	yes	Impact	4699.33	1658.67	185.918	52.3683	-1.8279	3.41097e-28	4.53386e-27	yes	Kcnab1	104.333	342.333	4.01233	12.672	1.65913	2.51522e-12	3.00105e-11	yes
Ptpn12	336.333	1415.67	15.501	54.7117	1.81949	4.44993e-56	5.90939e-55	yes	C1qtnf4	322.333	47	33.4733	4.26533	-2.97228	3.65636e-28	4.85648e-27	yes	Prim2	445	209.667	25.8197	12.453	-1.05198	2.61257e-12	3.10495e-11	yes
Prkacb	7571	2703.67	244.472	74.3017	-1.7182	4.51187e-56	5.98725e-55	yes	Slitrk3	529.667	93.3333	18.113	2.80233	-2.69233	3.75947e-28	4.98977e-27	yes	Tcp11l2	401.667	787	16.787	33.865	1.01245	2.65069e-12	3.14819e-11	yes
Tceal3	1044.33	152.667	131.769	15.5423	-3.08374	4.64731e-56	6.16245e-55	yes	Rgs6	752	197	28.0537	6.86967	-2.02988	3.7644e-28	4.99266e-27	yes	Shisa4	449	884	29.0643	58.7517	1.01538	2.65746e-12	3.15417e-11	yes
Tpcn2	36.6667	577.667	1.86	22.176	3.57562	4.76281e-56	6.31098e-55	yes	Jak3	74	421.333	2.494	12.47	2.32193	3.97922e-28	5.2737e-27	yes	Glb1l	200.333	493	11.1157	26.8127	1.27032	2.72096e-12	3.22742e-11	yes
Il21r	24.6667	476.333	1.392	22.972	4.04465	4.77378e-56	6.3209e-55	yes	P2ry14	30	272.667	2.093	18.2147	3.12146	4.07502e-28	5.39672e-27	yes	Elfn2	184.333	430	2.889	6.81	1.23708	2.78901e-12	3.30599e-11	yes
Lrrc25	14	530	1.02233	32.7043	4.99954	5.03407e-56	6.66066e-55	yes	Tacr3	225	16.3333	8.136	0.512	-3.9901	4.24849e-28	5.62234e-27	yes	Carmil2	23	116	0.630333	3.261	2.37113	2.82888e-12	3.35106e-11	yes
Melk	7	418	0.319333	16.215	5.66612	5.47977e-56	7.24507e-55	yes	Gnai1	2705.33	861.667	116.275	32.4153	-1.8428	4.3089e-28	5.69813e-27	yes	Ankrd34b	9	74.6667	0.254667	2.24267	3.13853	2.86412e-12	3.39058e-11	yes
Gm49369	21	458.667	3.47933	63.283	4.18494	5.87661e-56	7.76408e-55	yes	Tram1	674.333	2204.67	30.9067	88.4527	1.51699	4.31747e-28	5.70529e-27	yes	Zfp366	281.333	101.667	5.037	1.86833	-1.43081	2.89117e-12	3.42037e-11	yes
Sh3pxd2b	615.333	2794	11.1583	42.933	1.94397	5.89159e-56	7.77819e-55	yes	Ms4a6d	35.3333	1435	3.41433	118.957	5.12269	4.51379e-28	5.96037e-27	yes	Klk8	1857.67	237	215.639	28.943	-2.89733	2.96961e-12	3.51088e-11	yes
Slc24a3	1481	315.333	53.7313	9.36133	-2.52098	5.91586e-56	7.80453e-55	yes	Coro6	285.333	33	20.9987	2.141	-3.29394	4.58526e-28	6.05034e-27	yes	Kl	14.3333	92.3333	0.317	2.126	2.74559	2.98393e-12	3.52551e-11	yes
Chsy1	201	1244	6.478	34.104	2.39632	6.94917e-56	9.16106e-55	yes	Bcl3	31	305.667	2.35267	19.761	3.07029	4.76823e-28	6.28464e-27	yes	Serpinb9b	69.3333	6.33333	2.42967	0.226667	-3.42211	3.01299e-12	3.55521e-11	yes
Serpinb6b	30.3333	456.667	1.96067	25.3837	3.69448	7.498e-56	9.87737e-55	yes	Cemip	130.667	3079	2.483	50.514	4.34653	4.76976e-28	6.28464e-27	yes	Reep4	370.333	153.333	27.2347	11.6477	-1.2254	3.09228e-12	3.6393e-11	yes
Chaf1a	67.6667	557.333	2.064	14.8477	2.84672	8.2631e-56	1.08773e-54	yes	Tagln	230	1298.33	19.332	96.039	2.31263	5.23849e-28	6.89722e-27	yes	Parm1	336	995	7.65467	23.2363	1.60197	3.11294e-12	3.66123e-11	yes
-	746.333	73.3333	29.1823	2.44567	-3.5768	9.14894e-56	1.20347e-54	yes	Rpl10-ps3	2993.67	7940.67	522.127	1210.2	1.21277	5.27887e-28	6.94534e-27	yes	Ddn	60.3333	221.333	1.81967	9.014	2.30849	3.15166e-12	3.70198e-11	yes
Thra	3497.67	966.667	239.034	52.8713	-2.17666	9.55157e-56	1.25552e-54	yes	Adamtsl1	224.667	1164.67	4.94	20.3497	2.04242	5.71675e-28	7.51599e-27	yes	Mtfr2	104	16.3333	5.995	1.02867	-2.54298	3.15628e-12	3.705e-11	yes
Pi4k2b	37.6667	488	1.75367	18.2513	3.37956	9.81149e-56	1.28875e-54	yes	Bace2	338	1259	15.3187	48.367	1.65873	5.82833e-28	7.65713e-27	yes	Myo18b	146	18.6667	1.97467	0.261667	-2.91581	3.24949e-12	3.81195e-11	yes
Itprip	40.6667	484	1.45267	15.771	3.4405	9.92725e-56	1.30301e-54	yes	Fkbp7	80.6667	603.667	13.0643	83.73	2.68011	5.88724e-28	7.72893e-27	yes	Suv39h1	765.333	366	30.5247	14.9647	-1.02842	3.31858e-12	3.88797e-11	yes
Klhdc7a	473.333	47.3333	8.15	0.697333	-3.54688	1.00536e-55	1.31863e-54	yes	Pxdc1	131.667	533.333	7.47033	27.588	1.8848	5.93653e-28	7.78799e-27	yes	Dbx2	113.667	357.667	3.70267	12.096	1.70789	3.35102e-12	3.92345e-11	yes
Topbp1	287	1371	7.55767	34.743	2.20071	1.15606e-55	1.51519e-54	yes	Acot7	4993	1656.33	459.65	133.42	-1.78456	6.24909e-28	8.1921e-27	yes	Prss46	112	17.6667	10.2367	1.64333	-2.63905	3.37373e-12	3.94748e-11	yes
Bcl3	31	481.667	2.35267	30.8303	3.71198	1.18649e-55	1.55395e-54	yes	Igfbp2	1107.67	5161	117.983	486.05	2.04253	6.48386e-28	8.49372e-27	yes	Sgk1	6567.67	3427.33	422.063	203.323	-1.05369	3.61581e-12	4.22528e-11	yes
Atp9a	6314.33	1755.67	239.781	55.698	-2.10602	1.30922e-55	1.71344e-54	yes	Fam111a	69	403	2.834	14.5183	2.35696	6.73254e-28	8.80896e-27	yes	Igkc	31.6667	221.333	6.697	47.798	2.83536	3.63981e-12	4.25059e-11	yes
P4htm	832.333	122	60.5847	7.67633	-2.98046	1.31493e-55	1.71968e-54	yes	Pitpnm1	1957	669	64.931	20.1993	-1.6846	6.73423e-28	8.80896e-27	yes	Uhrf2	1168.67	570	38.02	18.9317	-1.00596	3.7458e-12	4.36873e-11	yes
Pcdh9	2412	421.333	59.0227	9.07267	-2.70167	1.35237e-55	1.76737e-54	yes	Wnk2	1330.67	380.333	32.556	8.228	-1.98431	7.0546e-28	9.22137e-27	yes	Nup155	729.333	363.667	13.9477	6.03467	-1.20868	3.77045e-12	4.39466e-11	yes
Zfp36l1	431	1755.33	19.4087	66.9963	1.78738	1.37088e-55	1.79026e-54	yes	Unc79	531	122	9.04467	1.84533	-2.29319	7.09873e-28	9.27236e-27	yes	Mmrn2	584	217.667	17.7433	6.43767	-1.46267	3.83182e-12	4.46046e-11	yes
Cdt1	33.6667	432.333	2.05767	22.4913	3.45029	3.01995e-55	3.94097e-54	yes	Tmem123	596.333	1811.67	27.8323	73.3007	1.39706	7.18411e-28	9.37713e-27	yes	Nrxn2	692.333	1459.33	19.0623	41.4537	1.12077	3.8983e-12	4.53493e-11	yes
Lmna	706	3997	42.447	196.734	2.21251	4.2841e-55	5.58663e-54	yes	Prdx4	336.333	1122	45.6227	132.585	1.53909	7.41818e-28	9.67568e-27	yes	Wnt2	191.667	50	9.64433	2.57933	-1.90268	3.95546e-12	4.59848e-11	yes
Cdc25b	69	660.333	3.04267	24.856	3.03019	4.49844e-55	5.86191e-54	yes	Tspan14	597.667	1892.67	32.546	89.5073	1.45953	7.79187e-28	1.01558e-26	yes	Cacnb1	72.3333	236.333	3.3	10.598	1.68325	4.0435e-12	4.6948e-11	yes
Casp7	64.3333	618	3.669	29.9317	3.02821	4.64293e-55	6.04584e-54	yes	Akna	83.6667	556.333	2.086	11.9893	2.52294	7.96058e-28	1.03671e-26	yes	Gprc5c	58	234.333	2.093	9.433	2.17214	4.04824e-12	4.69608e-11	yes
Tgm1	7	476	0.343333	20.1097	5.87214	4.64997e-55	6.05065e-54	yes	Prkcz	2813	932.667	108.989	32.6067	-1.74094	7.96544e-28	1.03671e-26	yes	Uts2	16	114.667	3.47333	24.927	2.84332	4.05236e-12	4.69608e-11	yes
Tmem163	519.667	57	25.9107	2.44433	-3.40603	4.85853e-55	6.31749e-54	yes	Plp2	104.667	841.667	12.1907	85.3213	2.80713	8.1667e-28	1.06214e-26	yes	Slamf9	162	383.333	14.067	34.1843	1.28102	4.12188e-12	4.77359e-11	yes
Cep192	122.667	702	2.16833	10.0677	2.21507	5.14153e-55	6.68066e-54	yes	Col27a1	93.3333	455.333	2.06867	8.77567	2.08481	8.51479e-28	1.10662e-26	yes	Slc38a4	94.3333	13.6667	3.376	0.472333	-2.83744	4.29138e-12	4.96672e-11	yes
Atp6v0e2	2662	654.667	199.802	41.7433	-2.25895	6.12759e-55	7.9562e-54	yes	Ttc7	132	747.333	3.929	18.8997	2.26613	8.8313e-28	1.14693e-26	yes	Nup160	722.667	331.667	14.6307	6.85133	-1.09454	4.32949e-12	5.00763e-11	yes
Phactr1	2692.33	734	90.181	20.21	-2.15775	6.92508e-55	8.98521e-54	yes	Cacng3	300.667	47	17.0403	2.176	-2.9692	8.9413e-28	1.16038e-26	yes	Galnt17	132	334.333	2.02233	5.13467	1.34425	4.59986e-12	5.31357e-11	yes
Mtmr7	668	105	36.1153	4.93533	-2.87139	7.8944e-55	1.02356e-53	yes	Bicc1	324.667	1988	8.71967	45.5053	2.38369	9.1969e-28	1.1927e-26	yes	Rtn2	99	303.333	8.96867	25.1647	1.48843	4.65115e-12	5.36939e-11	yes
Tfpi2	8.66667	447.333	0.843	33.7787	5.32444	8.39587e-55	1.08779e-53	yes	Casp1	48.6667	325.333	4.39767	25.267	2.52244	9.72741e-28	1.2606e-26	yes	Hopx	454.667	991.333	46.1247	103.192	1.16172	4.73822e-12	5.45949e-11	yes
Usp11	1946.67	509.333	75.5887	16.7677	-2.17249	1.00958e-54	1.30711e-53	yes	Rilpl2	121.333	690.333	11.5867	57.964	2.32269	1.05379e-27	1.36466e-26	yes	Frem2	75.6667	214.333	0.702667	2.03233	1.53222	4.90199e-12	5.6446e-11	yes
Cttnbp2nl	638	2377.67	18.369	57.59	1.64855	1.18898e-54	1.53827e-53	yes	Epsti1	15.6667	220.333	1.17233	13.8183	3.55913	1.24575e-27	1.61209e-26	yes	Nrip2	25.3333	120	1.71667	7.99533	2.21955	5.38553e-12	6.18961e-11	yes
Kcnq3	1383.67	288	15.8307	2.78333	-2.50784	1.20713e-54	1.56064e-53	yes	Naip5	19	256.667	0.480667	5.74567	3.57937	1.36058e-27	1.75944e-26	yes	Ugt1a7c	1444.33	679.333	71.9937	32.7767	-1.1352	5.62413e-12	6.44748e-11	yes
Sipa1	232	1026	9.17967	34.4063	1.90616	1.21834e-54	1.574e-53	yes	Ly6h	447.667	81	60.1587	9.965	-2.59383	1.38461e-27	1.78922e-26	yes	Bbs2	127.667	307	4.74833	11.763	1.30876	5.96696e-12	6.82756e-11	yes
Aplp1	23443.7	6119.67	1340.07	297.667	-2.17054	1.35073e-54	1.7438e-53	yes	Prelp	908	4653.67	34.0193	150.04	2.14092	1.38682e-27	1.79081e-26	yes	Zfp185	35.6667	140.333	1.15067	4.61667	2.00438	6.02429e-12	6.88881e-11	yes
Smc2	121.333	882.333	3.06767	18.6913	2.60716	1.3866e-54	1.78883e-53	yes	Hectd4	3540	1315	41.317	11.643	-1.82727	1.41335e-27	1.82377e-26	yes	Agfg1	2075.33	1202.67	70.8777	33.35	-1.08764	6.33219e-12	7.22722e-11	yes
Erich3	542	67.6667	10.5823	1.73333	-2.61004	1.53279e-54	1.97602e-53	yes	St6gal1	689.667	2502.67	21.6183	68.7263	1.66861	1.45326e-27	1.87394e-26	yes	Itgb8	2077	4199.67	28.451	58.6417	1.04345	6.60128e-12	7.52015e-11	yes
Kdelr3	85.6667	808.667	8.17867	65.4083	2.99954	1.56345e-54	2.01411e-53	yes	Cd72	6.66667	205.667	0.554333	15.7473	4.82821	1.48269e-27	1.91052e-26	yes	Smc4	1001.67	463.333	28.4877	13.7143	-1.05465	6.90161e-12	7.85242e-11	yes
Rnf112	871.667	127	37.6477	4.68433	-3.00664	1.71463e-54	2.2073e-53	yes	Nfkb1	371	1233	16.6793	48.7383	1.547	1.49726e-27	1.92792e-26	yes	Gad2	51.3333	189.333	1.00767	3.86333	1.93883	7.55501e-12	8.58507e-11	yes
Pik3cg	74.3333	652.333	1.967	13.8883	2.8198	1.78152e-54	2.29178e-53	yes	Tmem150c	1041.67	245.333	49.4947	10.784	-2.19838	1.50476e-27	1.93496e-26	yes	Gsta4	366.667	782	42.587	93.813	1.13937	7.67641e-12	8.7121e-11	yes
Slc25a23	3022.67	738.667	123.255	27.2323	-2.17826	2.01742e-54	2.59339e-53	yes	Snca	782.333	186.667	84.302	17.4217	-2.27468	1.50486e-27	1.93496e-26	yes	Chrm1	19	105.333	0.462667	2.936	2.66581	7.74226e-12	8.78133e-11	yes
Astn1	2636.67	560.333	49.503	8.99333	-2.46059	2.62589e-54	3.37319e-53	yes	Ppp1r14b	196	740	26.9217	88.8217	1.72214	1.509e-27	1.93891e-26	yes	Slc22a3	4.33333	63.6667	0.141667	2.126	3.90757	7.76069e-12	8.79674e-11	yes
Phkg1	397	17.6667	22.3467	1.22167	-4.19314	3.16528e-54	4.0632e-53	yes	Usp31	2986.33	1041.67	39.443	12.029	-1.71325	1.51523e-27	1.94553e-26	yes	Pclo	146.667	367	1.277	3.49933	1.45432	8.03301e-12	9.09973e-11	yes
Pgap4	1263.67	192.667	77.3953	8.978	-3.10778	4.18906e-54	5.37359e-53	yes	Slc25a12	3398.67	1276.67	135.868	46.5783	-1.54447	1.65613e-27	2.12493e-26	yes	Tlr9	92.3333	396	3.01	13.14	2.12613	8.04244e-12	9.10472e-11	yes
Rnft2	708.333	102.333	23.2187	2.81967	-3.04169	4.49969e-54	5.76796e-53	yes	Aqp4	11342	30494	318.444	745.814	1.22778	1.66294e-27	2.13217e-26	yes	Pfn4	30.3333	128	2.91367	10.312	1.82342	8.15397e-12	9.21947e-11	yes
Lrrfip1	440.667	1723	29.746	63.4337	1.09255	4.58699e-54	5.8757e-53	yes	Tgtp1	36.6667	541.333	1.75667	22.048	3.64974	1.71641e-27	2.19917e-26	yes	Col6a2	4686	10502.7	133.85	305.355	1.18987	8.58454e-12	9.69423e-11	yes
Rilpl2	121.333	1308.67	11.5867	106.897	3.20569	5.11942e-54	6.55308e-53	yes	Calm1	33510.7	11692.7	1093.25	334.758	-1.70743	1.73022e-27	2.21529e-26	yes	Cnnm3	294	585.667	6.44933	13.172	1.03025	8.69242e-12	9.80384e-11	yes
Tubb3	7566.33	1041	543.191	64.2907	-3.07878	5.20196e-54	6.65402e-53	yes	Eva1b	24.6667	256.667	2.42433	22.3273	3.20315	1.73249e-27	2.21663e-26	yes	Bbs1	171.333	388.333	3.495	8.10633	1.21376	8.77382e-12	9.8895e-11	yes
Napg	2345.33	685.333	89.8663	23.6367	-1.92675	6.14607e-54	7.85611e-53	yes	Nin	242.667	837.333	4.629	11.6	1.32535	1.7359e-27	2.21943e-26	yes	Crb2	18.6667	126.667	0.325667	2.33867	2.84422	8.83757e-12	9.95516e-11	yes
Dlgap5	5.66667	408.333	0.364333	16.8217	5.52892	6.66339e-54	8.51135e-53	yes	Shisa5	678.667	2949.33	66.8523	225.783	1.75589	1.73734e-27	2.2197e-26	yes	Esco2	124	22.3333	4.83233	0.898333	-2.4274	8.94834e-12	1.00737e-10	yes
Arhgap10	93.6667	643.667	4.32967	26.2163	2.59814	6.83986e-54	8.73059e-53	yes	Ier2	47	320	4.10067	24.6207	2.58594	1.76258e-27	2.25036e-26	yes	Gm20605	89.3333	254.667	2.299	6.687	1.54035	8.99077e-12	1.01152e-10	yes
Asrgl1	3342	765.333	106.645	20.8337	-2.35583	8.47304e-54	1.08076e-52	yes	Cldn1	93.3333	663.667	3.91067	23.921	2.61279	1.83659e-27	2.34321e-26	yes	P2rx6	13.6667	95	0.671	4.86	2.85657	9.19409e-12	1.03375e-10	yes
Abcg4	911.333	104	34.4873	3.403	-3.34119	9.98662e-54	1.27293e-52	yes	St14	19.6667	212.333	0.816	7.70833	3.23978	1.84253e-27	2.34912e-26	yes	Trp63	9.33333	80.3333	0.330333	2.24033	2.76172	9.20795e-12	1.03467e-10	yes
Samhd1	294.333	1490.33	13.7097	59.995	2.12965	1.08927e-53	1.38744e-52	yes	B3galt5	2075.33	714.333	54.017	16.272	-1.73102	1.87978e-27	2.39494e-26	yes	Lmnb2	451	217.667	15.2753	7.54267	-1.01806	9.57852e-12	1.07431e-10	yes
Rhbdl3	456.333	45.6667	16.3833	1.398	-3.55079	1.09187e-53	1.38977e-52	yes	Sucla2	2599.67	940.667	184.283	59.2913	-1.63603	1.91083e-27	2.43278e-26	yes	D630045J12Rik	261.667	541.333	2.72767	5.80367	1.0893	9.5933e-12	1.0753e-10	yes
Whrn	650.667	70.3333	23.922	2.58367	-3.21085	1.09556e-53	1.39349e-52	yes	Adamts10	122.333	833.333	4.42967	25.6333	2.53275	1.93431e-27	2.46095e-26	yes	Rims2	69.3333	217.333	1.877	6.69533	1.83473	9.6233e-12	1.078e-10	yes
Hhatl	463.333	33.3333	37.8377	2.686	-3.81629	1.17334e-53	1.49137e-52	yes	Cald1	695	2961.67	27.49	90.782	1.7235	2.01743e-27	2.5649e-26	yes	Sema3a	163.333	425.667	3.75667	9.38067	1.32024	9.91347e-12	1.10982e-10	yes
Hck	69	577	4.43667	31.446	2.82533	1.22796e-53	1.55969e-52	yes	Coro1b	941.667	2773.67	77.189	196.29	1.34652	2.07269e-27	2.6333e-26	yes	B3galt1	100	264.667	3.43567	8.303	1.27304	1.0237e-11	1.14534e-10	yes
Adam9	1079.33	3816.67	35.989	108.332	1.58983	1.29209e-53	1.64e-52	yes	Cntnap4	560.667	74.6667	15.5167	1.81867	-3.09287	2.13007e-27	2.70431e-26	yes	Ell2	863.333	445	30.086	14.2823	-1.07486	1.08513e-11	1.21256e-10	yes
Myh14	1630	346	34.93	6.72367	-2.37715	1.40852e-53	1.78653e-52	yes	Cxcl10	16	280.667	1.949	29.618	3.92567	2.24627e-27	2.84984e-26	yes	Gpc5	9.66667	85	0.427667	3.54967	3.05312	1.1275e-11	1.25759e-10	yes
Vat1	1622.67	8919.33	79.124	366.506	2.21165	1.6826e-53	2.13267e-52	yes	Lpcat1	493.333	1508	19.825	50.529	1.34979	2.45418e-27	3.11144e-26	yes	Cenph	109	19	9.93033	1.78833	-2.47323	1.14859e-11	1.28032e-10	yes
Pycard	42.6667	754.667	4.516	85.9763	4.25082	1.811e-53	2.2938e-52	yes	Ccnd2	419.333	1332	9.27033	25.2863	1.44766	2.7503e-27	3.48442e-26	yes	Dpep1	37.6667	223	2.07267	11.7263	2.50019	1.21174e-11	1.34988e-10	yes
Ppp4r1	324.333	1425.67	13.7533	45.8977	1.73864	1.83155e-53	2.31821e-52	yes	Rbpms	61.6667	377	3.80567	21.2883	2.48384	2.82918e-27	3.58185e-26	yes	Phactr3	144	363	6.61233	16.4573	1.3155	1.22335e-11	1.36198e-10	yes
Gng5	510.667	2160.67	114.376	413.488	1.85406	2.03863e-53	2.57851e-52	yes	Tlr4	41	388	1.34367	11.1723	3.05568	2.93954e-27	3.71897e-26	yes	Fam110d	192.333	52.3333	17.8437	4.95533	-1.84836	1.24178e-11	1.38165e-10	yes
Apaf1	141	835.667	2.974	14.7563	2.31086	2.18844e-53	2.76606e-52	yes	Abcg4	911.333	268.667	34.4873	8.927	-1.94982	3.14968e-27	3.98205e-26	yes	Fzd9	31.6667	131	1.56767	6.72867	2.1017	1.30754e-11	1.45215e-10	yes
Itgav	1857.33	7377.67	41.8103	132.821	1.66755	2.19341e-53	2.77041e-52	yes	Hecw2	661.333	178	8.36433	2.01967	-2.05013	3.29308e-27	4.16044e-26	yes	Epha5	84.3333	243.333	1.714	4.85267	1.50141	1.31072e-11	1.45479e-10	yes
Cit	1512.67	359.333	27.0517	6.16933	-2.13253	3.12841e-53	3.9486e-52	yes	Agrn	1296.33	3946.33	24.396	64.46	1.40176	3.52286e-27	4.44764e-26	yes	Btbd17	9.33333	74.3333	0.620667	5.08633	3.03474	1.32256e-11	1.46703e-10	yes
Tmem273	9.66667	402.667	0.899	38.578	5.42331	3.56105e-53	4.49154e-52	yes	Jun	722	2279.33	30.347	84.236	1.47288	3.54849e-27	4.47688e-26	yes	Cd1d1	174	55.3333	10.2047	3.36367	-1.60112	1.3524e-11	1.49829e-10	yes
Tnfrsf12a	185.667	983.667	25.3673	114.104	2.16931	3.92451e-53	4.94652e-52	yes	Actn1	366.333	1371.33	15.6167	47.3507	1.6003	3.61438e-27	4.55683e-26	yes	Cpeb1	287.667	651.333	11.378	26.2717	1.20726	1.35428e-11	1.49947e-10	yes
Ripk3	7.66667	373.667	0.909	24.7887	4.76926	4.68447e-53	5.90028e-52	yes	Map9	827	212.667	18.0027	4.10467	-2.13287	3.75191e-27	4.72694e-26	yes	Agps	2025.33	1166.67	52.8713	23.1877	-1.18913	1.40045e-11	1.54963e-10	yes
Cyp4f18	3.66667	606.333	0.305	40.5203	7.05369	4.87136e-53	6.1314e-52	yes	Fbxo31	1917.67	613.333	66.5003	17.4583	-1.92945	4.80226e-27	6.04605e-26	yes	Pccb	722.667	1396	35.7397	71.7987	1.00643	1.40495e-11	1.55272e-10	yes
Lamp2	2792.67	10372	155.174	448.052	1.52978	5.0567e-53	6.36026e-52	yes	Slc25a22	1229.33	424	83.992	22.1617	-1.92219	5.03525e-27	6.33498e-26	yes	Fgf12	81	386	5.38967	20.2833	1.91203	1.50038e-11	1.65516e-10	yes
Casp3	141.667	785.333	7.90933	36.37	2.20112	5.73624e-53	7.20996e-52	yes	Dmxl2	3101	982	45.9887	12.382	-1.89303	5.06242e-27	6.36474e-26	yes	Smim17	2.33333	59.3333	0.0803333	2.17867	4.7613	1.53132e-11	1.68724e-10	yes
Fsd1	617.333	81.6667	47.3047	5.32333	-3.15158	5.9371e-53	7.45724e-52	yes	Elfn2	1214.33	430	22.276	6.81	-1.70976	5.43893e-27	6.83336e-26	yes	Traf1	51.6667	182.667	2.73967	10.0687	1.8778	1.58379e-11	1.74294e-10	yes
Smim17	999.667	2.33333	44.107	0.0803333	-9.10079	6.73271e-53	8.4507e-52	yes	Kcnq3	1383.67	463.333	15.8307	4.58633	-1.78731	5.45667e-27	6.8509e-26	yes	Cdca7l	309	124	15.8947	6.42433	-1.30692	1.59865e-11	1.75823e-10	yes
Tmod3	531.333	2924.67	24.0403	93.043	1.95244	7.54773e-53	9.46711e-52	yes	Tap2	185.667	1046.33	7.243	35.3617	2.28753	5.64299e-27	7.07991e-26	yes	Cdt1	432.333	176.333	22.4913	9.396	-1.25925	1.60143e-11	1.76022e-10	yes
Stac2	1674.67	316	75.2137	11.7783	-2.67486	8.18269e-53	1.02564e-51	yes	Rundc3a	2734.33	764.333	186.963	44.906	-2.05777	5.71231e-27	7.16193e-26	yes	Megf6	195.667	504	3.38367	8.929	1.39991	1.60452e-11	1.76254e-10	yes
Erc2	662	83.3333	16.635	2.486	-2.74232	8.39461e-53	1.05148e-51	yes	Gldn	109.333	695.667	3.125	17.5687	2.49108	5.73139e-27	7.18089e-26	yes	Atf1	889.667	435.333	59.028	26.7443	-1.14217	1.61453e-11	1.77246e-10	yes
Slitrk3	529.667	46.3333	18.113	1.37633	-3.71812	8.69283e-53	1.08808e-51	yes	Scamp1	3518.33	1493	112.691	41.3973	-1.44477	5.76694e-27	7.22043e-26	yes	Rnf125	196	59.6667	16.4727	5.12767	-1.6837	1.62655e-11	1.78458e-10	yes
Wwtr1	520.667	2506	14.9187	61.2407	2.03737	1.03376e-52	1.29306e-51	yes	Elovl4	844.667	229	38.2293	9.14633	-2.06341	6.01215e-27	7.52225e-26	yes	Zcchc12	67.3333	266.333	3.54267	14.767	2.05947	1.64799e-11	1.80701e-10	yes
Hsd3b7	175.667	872	14.595	58.2793	1.99751	1.07349e-52	1.34183e-51	yes	Klhl4	712	192.333	27.248	6.45067	-2.07863	6.08203e-27	7.60442e-26	yes	Pacrg	30	134	2.30233	10.667	2.21199	1.66935e-11	1.82932e-10	yes
Rundc3b	473.333	52.6667	19.526	1.77	-3.46358	1.11774e-52	1.39617e-51	yes	Myh10	4663.67	1719.67	81.0567	25.96	-1.64264	6.92956e-27	8.65813e-26	yes	Cnnm1	21.6667	107.667	0.527	2.60067	2.30301	1.73986e-11	1.90544e-10	yes
Plekhb1	26134	6106.33	1929.87	392.03	-2.29947	1.18057e-52	1.47364e-51	yes	Camk2a	1945	442.333	58.1413	11.8417	-2.29569	7.22768e-27	9.02439e-26	yes	Rit2	45.3333	187.333	2.82533	12.0707	2.09501	1.75686e-11	1.9229e-10	yes
Mab21l2	438	4.66667	26.356	0.236667	-6.79913	1.2304e-52	1.53478e-51	yes	Smim10l2a	447.333	86.3333	25.1213	4.24267	-2.56587	7.28664e-27	9.09174e-26	yes	Haus6	414.333	186.667	7.98733	3.56067	-1.16557	1.76644e-11	1.93222e-10	yes
Lypd6b	413	9	24.0537	0.451667	-5.73485	1.24395e-52	1.5506e-51	yes	Slc4a3	1421.33	485.333	44.87	14.1533	-1.66461	7.53235e-27	9.39185e-26	yes	Kcnk3	24.6667	111.333	0.737667	3.44233	2.22235	1.78394e-11	1.95018e-10	yes
Erbb4	953.667	110	11.8697	1.079	-3.45951	1.27786e-52	1.59178e-51	yes	Galc	560.333	1873	23.6443	67.6493	1.51658	7.79363e-27	9.71095e-26	yes	Prrg3	173.333	446	3.41933	9.272	1.43917	1.85099e-11	2.01377e-10	yes
Apbb1	5915.33	1509	312.673	72.5633	-2.10734	1.28569e-52	1.60043e-51	yes	Slfn5	188.333	1099	4.903	23.8933	2.28487	8.3e-27	1.03348e-25	yes	Spred3	379.667	172.667	10.672	4.993	-1.09585	1.86915e-11	2.03231e-10	yes
Flnc	319.667	2008.33	4.80233	25.4317	2.40482	1.31855e-52	1.64021e-51	yes	Slc24a5	16.3333	215.667	1.14267	13.0167	3.50988	8.58933e-27	1.06877e-25	yes	Loxl2	6283.33	2684.33	136.554	58.6693	-1.21879	1.87293e-11	2.03519e-10	yes
Gimap4	17.6667	348.667	1.62167	23.796	3.87517	1.32336e-52	1.64506e-51	yes	Lamp1	13541	35099.3	815.859	1839.95	1.17328	9.03392e-27	1.12332e-25	yes	Abcc9	363.333	144.667	6.353	2.39067	-1.41003	1.95922e-11	2.12387e-10	yes
AB124611	6.33333	453.333	0.674667	39.6243	5.87607	1.36501e-52	1.69567e-51	yes	Glis3	49.6667	331.333	1.00867	5.39633	2.41953	9.06479e-27	1.12638e-25	yes	Gabbr2	75.3333	316.333	1.49767	6.671	2.15519	2.01643e-11	2.18328e-10	yes
Dffa	1771.33	396.333	108.298	20.171	-2.42465	1.41505e-52	1.75663e-51	yes	Syn3	247	29.3333	14.034	1.456	-3.26884	9.14649e-27	1.13576e-25	yes	Erbb3	609.667	1237	11.6567	24.014	1.04272	2.27545e-11	2.45495e-10	yes
Gpr22	369.667	6.33333	12.4253	0.238667	-5.70214	1.4677e-52	1.82074e-51	yes	Tmem179	894	197.333	53.6867	9.77467	-2.45744	9.16113e-27	1.1368e-25	yes	Sirpb1c	342.667	96	26.033	7.46833	-1.80148	2.30613e-11	2.48656e-10	yes
Mylip	149.667	1032.33	6.61667	39.0287	2.56036	1.51654e-52	1.88003e-51	yes	Szrd1	645.667	2029.33	26.69	73.259	1.45671	9.41715e-27	1.16777e-25	yes	Slc16a10	651.667	324.333	15.0197	7.446	-1.01232	2.35219e-11	2.53021e-10	yes
Entpd1	253.667	1112.33	10.768	36.94	1.77843	1.54234e-52	1.9107e-51	yes	Npl	127.667	755	9.817	50.5173	2.36342	9.52946e-27	1.18088e-25	yes	Cenpl	236.667	81.3333	11.6833	4.34533	-1.42691	2.5085e-11	2.69675e-10	yes
Kdelr2	493.667	2524.67	36.333	157.379	2.11489	1.55222e-52	1.92164e-51	yes	Alox8	211	18.6667	8.799	0.679	-3.69586	9.69221e-27	1.20023e-25	yes	Zfp316	167.667	366.333	2.88633	6.53133	1.17814	2.51454e-11	2.70164e-10	yes
Tmx2	6691	1672.67	443.742	97.6253	-2.18439	1.73694e-52	2.14885e-51	yes	Insyn1	1008.33	298.333	66.2117	17.236	-1.94166	9.76967e-27	1.209e-25	yes	Pou3f2	81.6667	228	1.67433	4.807	1.52155	2.56655e-11	2.75263e-10	yes
Arf4	1797.67	6274.67	130.447	393.513	1.59295	1.79888e-52	2.22395e-51	yes	Plekha6	2780	883.667	59.589	17.7427	-1.74782	9.7844e-27	1.20999e-25	yes	Cbarp	142	418	5.568	17.362	1.6407	2.58871e-11	2.77476e-10	yes
Prrx1	196	1661.67	5.15367	37.1857	2.85108	1.93907e-52	2.39563e-51	yes	Egflam	146.667	970.333	4.31167	24.045	2.47942	1.00688e-26	1.24432e-25	yes	Plekha6	445.667	883.667	8.74367	17.7427	1.02091	2.7571e-11	2.95176e-10	yes
Uap1l1	224	1770.67	8.903	60.153	2.75627	1.97325e-52	2.43619e-51	yes	Ppp3cb	3061.33	1228	135.396	47.9727	-1.4969	1.02551e-26	1.26648e-25	yes	Lmcd1	307.667	106.667	20.1487	7.21033	-1.48255	2.89534e-11	3.09611e-10	yes
Enpp1	565.333	2234.67	13.3217	60.642	2.18654	2.28589e-52	2.82025e-51	yes	C5ar1	20.6667	270.333	1.62667	19.134	3.55615	1.10168e-26	1.35962e-25	yes	4930579G24Rik	176.333	58.6667	10.2353	3.49367	-1.55074	2.94351e-11	3.14323e-10	yes
Svil	248	1402	5.411	25.1907	2.21892	2.2958e-52	2.83055e-51	yes	Pnma3	217.667	24.6667	8.59667	0.845667	-3.34562	1.12358e-26	1.38569e-25	yes	Iqsec2	385.333	741.333	13.647	32.027	1.2307	2.94461e-11	3.14323e-10	yes
Stxbp5l	381	6.33333	12.4567	0.184	-6.08107	2.44778e-52	3.01587e-51	yes	Ppfia4	1062	211.333	26.04	4.866	-2.41992	1.1401e-26	1.40511e-25	yes	Oprl1	19.6667	99	0.810667	4.05967	2.32418	3.00404e-11	3.20109e-10	yes
Heg1	1020.33	3752	20.861	58.6667	1.49173	2.61225e-52	3.21632e-51	yes	Rhof	549.333	124	32.965	6.044	-2.44736	1.2232e-26	1.5065e-25	yes	Mis18bp1	170.667	37	5.338	1.21033	-2.14089	3.09501e-11	3.29408e-10	yes
Fam219a	3283	942	131.307	32.164	-2.02943	3.48693e-52	4.29035e-51	yes	Ankrd45	415	90.6667	15.8577	2.86167	-2.47025	1.27487e-26	1.56908e-25	yes	Mpzl2	808.667	394.333	29.9723	14.8983	-1.00848	3.17598e-11	3.3763e-10	yes
Cnot6	586.333	2499	16.789	63.5717	1.92087	3.80932e-52	4.68383e-51	yes	Kcnj16	1508	446	54.9247	14.254	-1.94609	1.31873e-26	1.62196e-25	yes	Aldh1l2	1020.67	495	19.649	9.66	-1.02436	3.24007e-11	3.44241e-10	yes
Ammecr1	46.6667	453.333	1.16567	9.54067	3.03293	4.07539e-52	5.00758e-51	yes	Dse	113.667	951.333	3.99867	25.5343	2.67485	1.43237e-26	1.76053e-25	yes	Neurl1a	163	412.333	6.223	14.0533	1.17523	3.35128e-11	3.55848e-10	yes
Kcnj10	16216	4390.67	402.253	92.7023	-2.11742	4.32854e-52	5.31503e-51	yes	Itga2	18.3333	205.333	0.987333	3.377	1.77413	1.5481e-26	1.90149e-25	yes	Col6a1	5414	11827.7	150.426	335.433	1.15697	3.45327e-11	3.66463e-10	yes
Ppib	977.667	4827.33	147.317	616.943	2.06622	4.38566e-52	5.3815e-51	yes	Slc22a17	5953	2329	342.554	117.328	-1.54579	1.55367e-26	1.90703e-25	yes	Npas3	114.667	285.333	2.47133	8.13867	1.7195	3.48506e-11	3.6962e-10	yes
Rps12	2046.33	8623	470.292	1689.04	1.84457	4.8488e-52	5.94578e-51	yes	Ar	382.667	81	5.12333	0.949	-2.4326	1.56685e-26	1.92067e-25	yes	Celf4	91.3333	278	2.982	9.741	1.70779	3.5399e-11	3.75217e-10	yes
Etv6	255.333	1192.67	6.06467	25.0643	2.04714	5.2365e-52	6.41684e-51	yes	Gbp3	107.333	758.667	5.92467	35.032	2.56387	1.5669e-26	1.92067e-25	yes	Atp7a	790.333	367	18.5783	8.789	-1.07985	3.58937e-11	3.80239e-10	yes
E2f8	18.6667	346	0.716667	11.0173	3.94233	5.81328e-52	7.11881e-51	yes	Nrip2	578	120	44.181	7.99533	-2.4662	1.56943e-26	1.92248e-25	yes	Usp29	17.3333	92.6667	0.423667	1.78867	2.07788	3.59537e-11	3.80652e-10	yes
Ntng1	434	37.3333	17.338	1.078	-4.00751	7.6215e-52	9.3268e-51	yes	Ica1	549.667	127.333	38.204	7.87533	-2.27831	1.57472e-26	1.92765e-25	yes	Fbxo41	22.3333	108.667	0.394667	1.98867	2.33309	3.71465e-11	3.93051e-10	yes
Vamp8	176.333	1061	28.6153	145.579	2.34694	7.97642e-52	9.75452e-51	yes	Mycbp2	4336.33	1756.33	67.7383	29.672	-1.19087	1.59353e-26	1.94935e-25	yes	Cenpu	97	16.3333	7.84633	2.08433	-1.91243	3.78795e-11	4.00339e-10	yes
Cd33	114.333	685	3.13533	19.0963	2.6066	8.28216e-52	1.01216e-50	yes	Lair1	162	859.667	9.82333	53.9983	2.45863	1.66177e-26	2.03146e-25	yes	Rai2	41	147.333	2.14867	7.853	1.8698	3.90632e-11	4.12129e-10	yes
Snx32	779.667	135.333	61.3273	8.995	-2.76934	8.29826e-52	1.01344e-50	yes	Slc8a3	762	240.333	22.3857	6.18033	-1.85682	1.66365e-26	2.03239e-25	yes	Cdh20	183	400	5.214	11.676	1.16308	4.05375e-11	4.27186e-10	yes
Ypel4	381.333	26.6667	30.5363	1.81267	-4.07434	8.48029e-52	1.03497e-50	yes	Inppl1	795.333	2223	26.4977	63.1627	1.25321	1.72839e-26	2.11006e-25	yes	Rragb	116.667	288	6.39033	15.5353	1.28159	4.19774e-11	4.4159e-10	yes
Klc1	10129.3	2630	589.822	128.773	-2.19545	9.69511e-52	1.18244e-50	yes	Tceal6	522.667	66	62.443	6.882	-3.18164	1.76151e-26	2.14904e-25	yes	Sybu	102.333	304.667	3.61433	11.6143	1.6841	4.29543e-11	4.51605e-10	yes
Dpep2	4.66667	485	0.406667	32.5797	6.32398	1.01398e-51	1.23567e-50	yes	Bcl11a	238.333	31.3333	11.679	1.037	-3.49343	1.76929e-26	2.15708e-25	yes	Igha	18	169.667	1.73033	17.4823	3.33678	4.29794e-11	4.51607e-10	yes
Man1a	481	1895	12.7493	47.3473	1.89286	1.01452e-51	1.23567e-50	yes	Ctdsp1	696.667	2526.67	32.919	106.296	1.69109	1.80758e-26	2.20228e-25	yes	Ndc1	1007	542.333	28.2273	13.923	-1.01962	4.32343e-11	4.54022e-10	yes
Ano4	684	87.3333	24.0857	2.93167	-3.03838	1.11392e-51	1.35582e-50	yes	Lrrc24	350.667	58.6667	24.6113	3.64	-2.75731	1.85679e-26	2.26072e-25	yes	Maob	115.333	274.333	5.468	13.3897	1.29203	4.57176e-11	4.79268e-10	yes
C1qtnf6	71	1016.33	4.01167	48.1667	3.58576	1.22266e-51	1.48717e-50	yes	Unc13a	1677.33	319	31.692	4.05867	-2.96504	1.88522e-26	2.29379e-25	yes	Tril	720.333	1554	15.233	33.878	1.15315	4.57646e-11	4.79484e-10	yes
Camk1d	2185.33	544	42.6387	8.915	-2.25786	1.28998e-51	1.568e-50	yes	AW551984	466	83.6667	16.658	2.535	-2.71616	1.91462e-26	2.32799e-25	yes	Clec2g	69.6667	5.66667	4.09233	0.315667	-3.69645	4.59198e-11	4.80218e-10	yes
Scamp5	4261.33	1187.67	213.951	54.7093	-1.96742	1.34316e-51	1.63154e-50	yes	Mbd6	187.667	659.667	6.57067	22.1863	1.75556	1.97094e-26	2.39487e-25	yes	Tmem276	138	367	12.8983	35.4127	1.45708	4.60322e-11	4.80899e-10	yes
Tenm4	1724.33	408.667	22.1927	4.05033	-2.45397	1.39123e-51	1.6888e-50	yes	Ehd2	415	2021.67	10.95	46.044	2.07208	2.04397e-26	2.48048e-25	yes	Zer1	586.333	1144.67	15.9587	31.9317	1.00065	4.68259e-11	4.88909e-10	yes
Akap13	453	2375.33	8.48667	40.1853	2.2434	1.47777e-51	1.79266e-50	yes	Tnfsf12	145	645.667	14.0297	53.3533	1.9271	2.04413e-26	2.48048e-25	yes	Zic4	130.667	334	6.85267	17.4663	1.34984	4.72266e-11	4.92808e-10	yes
Clspn	10.3333	349	0.278333	10.8583	5.28585	1.483e-51	1.79779e-50	yes	Zfp469	69	416.667	0.900333	4.38	2.2824	2.31003e-26	2.80126e-25	yes	Nhp2	909	435	99.072	48.9407	-1.01744	4.7919e-11	4.99747e-10	yes
Kcnb1	962.667	131.333	11.7897	1.43367	-3.03974	1.51375e-51	1.83384e-50	yes	Surf4	1360	4310.67	55.955	154.012	1.4607	2.35209e-26	2.85035e-25	yes	Ppargc1a	58.3333	186.667	1.316	4.05367	1.62307	5.2334e-11	5.44226e-10	yes
Ccnf	40.3333	454	1.31067	12.6017	3.26524	1.56603e-51	1.8959e-50	yes	Agap2	1260.33	417.667	33.466	10.0433	-1.73646	2.44217e-26	2.95754e-25	yes	Mrc2	1708.33	3640.33	33.6983	73.357	1.12226	5.27463e-11	5.48199e-10	yes
Lrp5	270	1279.33	7.05	28.29	2.0046	1.69642e-51	2.05238e-50	yes	Pkdcc	98	528.333	7.54967	29.9387	1.98753	2.4543e-26	2.97024e-25	yes	Fzd8	150.333	352.667	2.86233	6.92133	1.27386	5.37364e-11	5.58169e-10	yes
Rpl39	711.333	2567	155.841	478.406	1.61816	2.01003e-51	2.43017e-50	yes	Nlrc5	19.3333	359	0.379	5.837	3.94496	2.52797e-26	3.05736e-25	yes	Cemip2	855.667	407.333	14.776	7.194	-1.03839	5.40923e-11	5.61544e-10	yes
Cnr2	17	355	0.598333	10.4487	4.12623	2.05e-51	2.47684e-50	yes	Snx5	1599	4561.33	87.557	218.114	1.31679	2.56995e-26	3.10605e-25	yes	Lix1	82	723	3.22433	27.8013	3.10808	5.43191e-11	5.63577e-10	yes
Rest	160.333	818	3.09667	13.3717	2.11039	2.0917e-51	2.52554e-50	yes	Nrep	1062.33	2856	65.7767	153.034	1.2182	2.7942e-26	3.37483e-25	yes	Dpp4	190	516.333	4.15433	11.5937	1.48065	5.49652e-11	5.69111e-10	yes
Ctif	2324.33	595	51.7617	11.271	-2.19927	2.20904e-51	2.66544e-50	yes	Pkn1	612	2013.67	17.2303	47.7577	1.47078	2.8678e-26	3.46142e-25	yes	Lgr6	141	33.6667	2.938	0.727	-2.01481	5.49781e-11	5.69111e-10	yes
Rhof	549.333	62	32.965	2.62667	-3.64963	2.39196e-51	2.88423e-50	yes	Slc9a7	356.667	68.3333	27.1013	4.313	-2.6516	2.97528e-26	3.58876e-25	yes	Lrrtm1	4.66667	57.6667	0.231667	2.59867	3.48765	5.54058e-11	5.73212e-10	yes
Wdr7	3766.67	1152.67	71.6183	18.9723	-1.91643	2.81761e-51	3.39521e-50	yes	Il17ra	223	800	3.875	12.056	1.63748	3.0736e-26	3.70488e-25	yes	Rad18	203.667	74.6667	9.32433	3.441	-1.43817	5.69296e-11	5.8864e-10	yes
Manf	781	2590.67	86.2393	248.542	1.52707	2.9339e-51	3.53299e-50	yes	B3gnt9	146.667	667	8.392	33.4313	1.99411	3.19817e-26	3.85247e-25	yes	Hyal2	692.667	353.667	57.8637	26.3523	-1.13473	5.75248e-11	5.94455e-10	yes
Ctnnd1	1356.33	4384.33	34.8873	96.2297	1.46378	3.03841e-51	3.6564e-50	yes	Sidt2	911.333	3167.33	42.593	109.265	1.35915	3.24823e-26	3.91018e-25	yes	Sntb1	93	255.667	2.17033	6.12967	1.49789	5.79801e-11	5.98819e-10	yes
Ube2o	2526.33	574.333	64.9863	12.6427	-2.36184	4.62585e-51	5.56301e-50	yes	Rbm47	8.33333	197.333	0.34	5.38867	3.98632	3.30689e-26	3.97815e-25	yes	Dtx1	156	438.667	4.37733	12.7053	1.53731	6.1064e-11	6.29952e-10	yes
Adamts9	138.333	992	2.508	15.0813	2.58815	4.9256e-51	5.91956e-50	yes	Arhgap17	178	751.667	7.28	27.163	1.89963	3.48453e-26	4.18907e-25	yes	Adgrf5	1453.33	793	39.828	18.738	-1.08782	6.11537e-11	6.3052e-10	yes
Rbm47	8.33333	377.667	0.34	12.098	5.15309	5.15276e-51	6.18844e-50	yes	Egr2	51	448.333	2.34233	17.905	2.93434	3.49935e-26	4.20409e-25	yes	Milr1	511	235.667	47.7237	22.386	-1.09211	6.11941e-11	6.30577e-10	yes
Slit1	772.667	76	19.171	1.768	-3.43874	5.2721e-51	6.32756e-50	yes	Cdk5r2	1242	231.667	59.6127	9.81367	-2.60275	3.63558e-26	4.36373e-25	yes	Zfp219	289	580	13.0747	28.018	1.09958	6.21595e-11	6.39799e-10	yes
Klf10	167.667	1030.33	7.85833	39.651	2.33506	5.30895e-51	6.36757e-50	yes	Hcn4	263	39.3333	5.782	0.755	-2.93702	3.63704e-26	4.36373e-25	yes	Adamts2	1035.33	2220.67	18.5607	39.167	1.07739	6.23769e-11	6.41672e-10	yes
Usp33	2525.33	761.667	84.6847	22.0667	-1.94023	5.51839e-51	6.61439e-50	yes	Map1b	32739.7	9307	373.129	93.673	-1.99397	3.75341e-26	4.50037e-25	yes	Itih3	404	778.667	17.7043	42.0053	1.24647	6.38569e-11	6.56524e-10	yes
Sh3bgr	373.333	6.66667	55.7177	1.02533	-5.76397	5.67486e-51	6.79743e-50	yes	Ahcyl1	9703.33	3553	342.515	112.072	-1.61175	3.88637e-26	4.6567e-25	yes	Rnf128	1184.33	539.333	48.8627	23.067	-1.0829	6.7136e-11	6.89455e-10	yes
Actl6b	346	9.33333	33.5027	0.910667	-5.20121	5.85617e-51	7.00996e-50	yes	Whrn	650.667	161.667	23.922	5.66267	-2.07878	4.24635e-26	5.08467e-25	yes	Ppm1l	637.667	1278.33	7.775	15.9747	1.03887	6.83437e-11	7.01461e-10	yes
Tcn2	627.333	3005.33	42.7837	173.864	2.02283	6.21684e-51	7.43677e-50	yes	Rhoh	22.3333	212.333	1.265	10.27	3.02123	4.54064e-26	5.43347e-25	yes	Klrb1b	21.3333	116.333	1.37733	7.79367	2.50042	7.14507e-11	7.32108e-10	yes
Rabgap1l	1439.67	341.333	45.4343	13.2007	-1.78317	6.5362e-51	7.81363e-50	yes	Sh3pxd2a	988.667	5222.67	14.5417	62.334	2.09983	4.56558e-26	5.45971e-25	yes	Ercc1	498.333	236.667	43.882	20.3247	-1.1104	7.16987e-11	7.34234e-10	yes
Epdr1	2881.33	731.333	171.453	38.486	-2.1554	6.95673e-51	8.31085e-50	yes	Cd4	3	220	0.126333	8.281	6.0345	4.77355e-26	5.70465e-25	yes	Usp20	316.667	670.667	7.395	16.715	1.17652	7.39062e-11	7.56412e-10	yes
A830018L16Rik	358.333	9.33333	13.496	0.297333	-5.50431	7.35986e-51	8.78665e-50	yes	Mef2c	329.667	1013.67	13.6013	27.715	1.02692	4.81822e-26	5.75423e-25	yes	Dll4	212	64	6.456	2.00433	-1.68752	7.46927e-11	7.64031e-10	yes
Kcnh1	441.667	40.6667	8.22367	0.715	-3.52377	7.79135e-51	9.29565e-50	yes	Dynlt1f	182.333	745.667	31.6123	113.145	1.83961	4.89399e-26	5.84087e-25	yes	Stk32b	186.667	53.3333	6.10733	1.81033	-1.75429	7.63765e-11	7.80814e-10	yes
Fignl1	19.6667	356	0.906	13.788	3.92776	8.45918e-51	1.00858e-49	yes	Pakap	515.667	72.3333	11.932	1.56167	-2.93368	4.91733e-26	5.86486e-25	yes	Eda	87	231.667	2.00533	5.466	1.44664	7.7753e-11	7.94438e-10	yes
Mgat5b	478	22.3333	15.136	0.593333	-4.673	9.89874e-51	1.17944e-49	yes	Hic1	72	567	2.903	19.687	2.76163	5.02226e-26	5.98607e-25	yes	Adamts10	413	833.333	12.5663	25.6333	1.02846	8.04205e-11	8.20769e-10	yes
Fgf9	447.333	8.66667	26.404	0.371667	-6.1506	1.0733e-50	1.27799e-49	yes	Ctif	2324.33	867	51.7617	16.8457	-1.61951	5.162e-26	6.14858e-25	yes	Gimap4	348.667	114.667	23.796	8.36	-1.50914	8.06006e-11	8.22144e-10	yes
Ptgr1	85.6667	741.333	4.96167	36.8037	2.89095	1.10049e-50	1.30951e-49	yes	Slc16a1	1573	4877.33	47.691	129.483	1.44098	5.47306e-26	6.51481e-25	yes	Itga10	82.3333	251	1.86633	5.807	1.63759	8.495e-11	8.6505e-10	yes
Etf1	1263.33	3534.67	45.89	108.964	1.2476	1.23351e-50	1.46683e-49	yes	Angpt2	76.6667	542	2.91733	17.77	2.60672	5.68423e-26	6.76173e-25	yes	Pard6g	266.667	539.333	9.67633	20.0253	1.04929	8.61733e-11	8.77014e-10	yes
Unc79	531	47.6667	9.04467	0.828667	-3.4482	1.33325e-50	1.5844e-49	yes	Thrsp	594.667	135	62.4527	12.4853	-2.32253	6.02728e-26	7.16511e-25	yes	Plscr2	139	370	9.13367	24.974	1.45116	8.73659e-11	8.88653e-10	yes
Mtx3	1065.33	217	22.7623	3.96733	-2.52041	1.50911e-50	1.7922e-49	yes	Il18bp	31.3333	1278.67	3.16933	107.053	5.078	7.19581e-26	8.54862e-25	yes	Bcl7a	230.333	460	5.60067	11.428	1.0289	8.88199e-11	9.02936e-10	yes
Cyfip1	1644	5892.67	49.0113	152.818	1.64062	1.54071e-50	1.82853e-49	yes	Vasp	277.333	992.667	16.8823	52.3177	1.63178	7.3224e-26	8.69331e-25	yes	Mmp24	28.6667	155.333	0.751	4.23633	2.49593	9.03173e-11	9.16104e-10	yes
Gfod1	1151	223	22.288	3.69067	-2.59431	1.76117e-50	2.0888e-49	yes	Tenm1	396.333	64.3333	4.15667	0.590333	-2.81583	7.34484e-26	8.71425e-25	yes	Map7d2	195	617	7.798	23.7223	1.60507	9.34729e-11	9.47053e-10	yes
Galnt2	746.333	2855.67	24.4153	79.158	1.69695	1.77283e-50	2.10126e-49	yes	Dag1	2302	8310.33	60.3397	179.653	1.57404	7.4243e-26	8.80275e-25	yes	Grid1	67	194	1.33	3.97367	1.57904	9.41245e-11	9.5259e-10	yes
Ehd2	415	3341.33	10.95	74.4993	2.7663	1.8104e-50	2.14438e-49	yes	Cdk5r1	879.667	204.333	29.9477	6.526	-2.19817	7.75935e-26	9.19399e-25	yes	Ddx11	175	54.6667	5.79733	1.61967	-1.83969	9.47767e-11	9.58122e-10	yes
Cd86	28	446.667	1.474	20.1983	3.77643	1.81473e-50	2.1481e-49	yes	Litaf	1179.33	3185	72.0183	166.801	1.21169	7.9324e-26	9.39289e-25	yes	Gask1a	10	73.3333	0.401667	2.75767	2.77938	9.49381e-11	9.59219e-10	yes
Pofut2	329	1444	19.47	73.3227	1.91301	1.87307e-50	2.21571e-49	yes	Gdi1	8796	3574	442.668	157.201	-1.49361	8.60933e-26	1.01878e-24	yes	Fbxl16	165.333	423	5.64667	14.29	1.33953	9.50644e-11	9.5996e-10	yes
Tpm1	2166.33	7904.67	151.644	529.057	1.80273	1.95642e-50	2.3128e-49	yes	Col25a1	577	161.333	14.182	3.138	-2.17614	9.0219e-26	1.0669e-24	yes	Scn2b	120	322	2.92833	8.08533	1.46523	9.51745e-11	9.60537e-10	yes
Scg2	4835	455.333	270.224	21.199	-3.67209	2.54531e-50	3.00699e-49	yes	Fhod1	70.3333	413.667	2.429	12.2973	2.33991	9.29358e-26	1.09832e-24	yes	Aldh5a1	317.333	632.333	6.402	13.1783	1.04157	9.52449e-11	9.60713e-10	yes
Mknk2	412	1850.33	18.0107	66.9957	1.89522	2.79875e-50	3.30424e-49	yes	Dlgap1	1111.67	353	28.222	8.91733	-1.66214	1.01124e-25	1.1943e-24	yes	Fcna	343.333	91	28.447	7.62667	-1.89915	9.61296e-11	9.69097e-10	yes
Arpp21	506.667	51.6667	22.458	2.056	-3.44932	3.09835e-50	3.65556e-49	yes	Fbxo9	2074	712	133.463	41.194	-1.69593	1.0235e-25	1.20799e-24	yes	Grik5	297	658.667	8.936	20.465	1.19546	9.62989e-11	9.70265e-10	yes
Camsap3	381	20.6667	17.402	1.01367	-4.1016	3.25101e-50	3.83318e-49	yes	Fam227b	206.333	9.66667	14.7013	0.626	-4.55364	1.07982e-25	1.27364e-24	yes	Tstd3	337	146.667	24.287	10.877	-1.1589	9.66878e-11	9.73642e-10	yes
Has2	11.6667	399.667	0.376333	10.6867	4.82766	3.39673e-50	4.00239e-49	yes	Slc25a27	558	138.333	26.409	5.89267	-2.16404	1.08718e-25	1.28149e-24	yes	Amigo1	146.667	414.333	3.594	10.5397	1.55217	9.7392e-11	9.80189e-10	yes
Slc10a4	351.667	7.66667	25.9963	0.509667	-5.67261	3.42131e-50	4.02872e-49	yes	Bex2	1372	351.667	203.482	45.8723	-2.1492	1.09521e-25	1.29011e-24	yes	Tex30	180.333	56.6667	19.7487	6.313	-1.64536	1.03729e-10	1.04107e-09	yes
Rnase4	253.333	2184	22.5523	165.124	2.8722	3.8927e-50	4.58082e-49	yes	Hycc2	1422.33	396.333	23.4883	5.49133	-2.09672	1.1175e-25	1.31552e-24	yes	Lrrc61	163.333	379.333	11.1363	23.277	1.06363	1.09033e-10	1.0925e-09	yes
Was	39	435.333	2.50333	23.4727	3.22906	4.13741e-50	4.86563e-49	yes	Dtx4	770	2336.67	19.7833	52.2363	1.40077	1.15854e-25	1.36294e-24	yes	Kcnip3	262.333	524.333	12.2387	25.7503	1.07314	1.15155e-10	1.15257e-09	yes
Magi1	1592.67	398.667	40.199	8.624	-2.22073	4.49623e-50	5.28417e-49	yes	Tlr9	35	396	1.36833	13.14	3.26347	1.16028e-25	1.3641e-24	yes	Necab3	15.3333	101.667	1.093	6.588	2.59155	1.15971e-10	1.16009e-09	yes
Swap70	177.667	959.333	5.935	27.2863	2.20086	4.57837e-50	5.37721e-49	yes	Gpr158	1579	350.667	29.7147	5.79267	-2.35888	1.25255e-25	1.47162e-24	yes	Grm7	26.6667	129	1.01333	3.83667	1.92074	1.1918e-10	1.19154e-09	yes
Cdh18	347	7.33333	17.8607	0.318667	-5.80859	4.64922e-50	5.45687e-49	yes	Rab29	132.333	526.333	14.587	51.2737	1.81353	1.29746e-25	1.5234e-24	yes	Acss2	241	501.333	9.642	20.549	1.09166	1.20619e-10	1.20526e-09	yes
Adcy7	380.333	1774.67	8.699	34.3437	1.98112	4.75269e-50	5.5747e-49	yes	Cflar	387.667	1246	9.88867	26.2827	1.41026	1.31216e-25	1.53966e-24	yes	Haghl	263.333	586.333	22.8397	52.3777	1.19741	1.2348e-10	1.23249e-09	yes
Eif1a	677.333	2368.33	39.9323	110.835	1.47278	4.75844e-50	5.57783e-49	yes	Cdh11	974.333	3235.67	23.3667	67.0667	1.52114	1.39305e-25	1.63352e-24	yes	Hyal1	759.333	369	32.4783	15.6377	-1.05445	1.2898e-10	1.28455e-09	yes
Dok1	34.3333	399.667	2.54833	26.6497	3.38649	4.79057e-50	5.61186e-49	yes	Lama1	126	772	1.78767	9.42633	2.39862	1.43604e-25	1.68284e-24	yes	Inpp5j	75	246.667	2.662	8.924	1.74518	1.33375e-10	1.32615e-09	yes
Espl1	14.6667	349.667	0.457667	6.29933	3.78283	5.07453e-50	5.94064e-49	yes	Fzd10	103.333	636.333	4.36333	22.977	2.39669	1.53679e-25	1.79974e-24	yes	Hpca	39.6667	158.667	3.463	13.025	1.91119	1.37748e-10	1.36722e-09	yes
Shd	387	22.6667	35.3493	1.79633	-4.29856	5.92751e-50	6.93196e-49	yes	Laptm4a	7104.67	19974	518.849	1270.46	1.29196	1.5538e-25	1.81849e-24	yes	C1qb	7713	15163	807.494	1624.27	1.00827	1.39071e-10	1.379e-09	yes
Oas1a	40	659	2.901	40.3663	3.79853	5.92898e-50	6.93196e-49	yes	Iglon5	1122.67	337.667	57.2127	15.0797	-1.92373	1.65621e-25	1.93709e-24	yes	Tpm3-rs7	4273	1874.33	224.728	102.704	-1.12968	1.39153e-10	1.37906e-09	yes
Rbpj	714.333	2352.67	17.928	50.4013	1.49125	6.02998e-50	7.04549e-49	yes	Neto1	474.667	109.333	7.66	1.542	-2.31254	1.66313e-25	1.94394e-24	yes	Camk2n2	100.333	245.667	8.878	22.3393	1.33128	1.41355e-10	1.40012e-09	yes
Dixdc1	1669.67	416.667	43.96	9.81833	-2.16264	6.51249e-50	7.60435e-49	yes	Pcdhgc3	1925	5439.33	55.1187	135.961	1.30258	1.70402e-25	1.99044e-24	yes	Mmp2	2088.67	4370	77.811	169.419	1.12255	1.43886e-10	1.42285e-09	yes
Opcml	1020	167	22.431	3.028	-2.88906	7.02017e-50	8.19186e-49	yes	Hmga1b	7.66667	204	0.628	33.568	5.74018	1.81686e-25	2.12088e-24	yes	Tmem120a	627.667	250	45.5303	18.7067	-1.28328	1.45054e-10	1.43363e-09	yes
Pcdh11x	389.667	36.6667	6.67	0.524333	-3.66913	8.65701e-50	1.00954e-48	yes	Prmt8	371.667	58	18.3177	2.52467	-2.85907	2.11831e-25	2.47118e-24	yes	Wfs1	473	933.333	14.4373	29.299	1.02105	1.48998e-10	1.471e-09	yes
Psd3	1937.67	554	31.1173	9.053	-1.78125	9.20384e-50	1.07262e-48	yes	Edem2	437.667	1367.33	25.643	69.7593	1.44382	2.15084e-25	2.50722e-24	yes	Sarm1	46.6667	153.667	1.28533	4.23	1.71852	1.57871e-10	1.55775e-09	yes
Pxn	400.667	2290.67	14.9473	72.9757	2.28753	1.08179e-49	1.2599e-48	yes	Dynlt1b	372	1544.33	64.967	233.946	1.84839	2.15197e-25	2.50722e-24	yes	Rab20	437.333	192	35.8043	16.142	-1.14931	1.58925e-10	1.5673e-09	yes
Sybu	907.333	102.333	39.0613	3.61433	-3.43394	1.15401e-49	1.34315e-48	yes	Maneal	935	235.667	46.044	10.2043	-2.17383	2.31e-25	2.6896e-24	yes	Dmpk	227	501.667	9.80067	22.721	1.21307	1.70465e-10	1.67837e-09	yes
Ptma	5294.33	17016	584.469	1609.43	1.46135	1.46165e-49	1.70012e-48	yes	Lpcat3	350	1320.33	21.5077	69.7023	1.69636	2.38067e-25	2.77011e-24	yes	Svop	57	187.333	2.48967	7.02133	1.49579	1.72499e-10	1.69748e-09	yes
Mycbp2	4336.33	1472.33	67.7383	20.4617	-1.72705	1.59911e-49	1.85881e-48	yes	Vcl	654.333	2377.67	16.7153	52.663	1.65562	2.40977e-25	2.80216e-24	yes	Cep128	304	136.333	10.0773	3.486	-1.53147	1.73123e-10	1.70177e-09	yes
Idi1	2896.33	695.667	156.876	32.527	-2.26992	1.64621e-49	1.91233e-48	yes	Slc25a25	2039	699.333	87.2547	26.9807	-1.69331	2.46153e-25	2.86052e-24	yes	Dcaf12l1	46.6667	148	1.525	4.96933	1.70424	1.80291e-10	1.77126e-09	yes
Epha5	575.333	84.3333	13.2143	1.714	-2.94666	1.67803e-49	1.94804e-48	yes	Dusp8	1101.67	370.333	31.6647	9.05967	-1.80534	2.49174e-25	2.89377e-24	yes	Macrod1	53.3333	166	4.93367	15.8173	1.68077	1.8483e-10	1.81291e-09	yes
Rbpms	61.6667	535.667	3.80567	30.9457	3.02352	1.7872e-49	2.07345e-48	yes	Mknk2	412	1492	18.0107	55.7253	1.62948	2.52611e-25	2.93181e-24	yes	Calb2	96	310.333	7.53833	25.4753	1.75678	1.85202e-10	1.81558e-09	yes
Plekha2	281.667	1237.33	9.456	40.1683	2.08676	1.823e-49	2.11363e-48	yes	Gria3	1133	358.333	33.0877	8.279	-1.99877	2.57401e-25	2.98549e-24	yes	Firrm	159.333	43.6667	6.06667	1.97467	-1.61929	1.9251e-10	1.88112e-09	yes
Hmga2	19	457.667	0.688333	13.9603	4.34208	2.09855e-49	2.43155e-48	yes	H2-T23	51.6667	511.667	4.88	40.7743	3.06271	2.59013e-25	3.00227e-24	yes	Dao	2.33333	54.3333	0.193333	3.361	4.11973	1.9686e-10	1.92259e-09	yes
Elovl2	397	33.3333	13.8757	0.996667	-3.7993	2.34522e-49	2.71562e-48	yes	Kif3c	4164.67	1587.67	103.167	36.7453	-1.48935	2.59402e-25	3.00485e-24	yes	Ano4	87.3333	244.667	2.93167	7.503	1.35575	2.02586e-10	1.97639e-09	yes
Pdlim1	239	1326.67	22.7587	101.921	2.16296	2.53679e-49	2.93556e-48	yes	Thy1	7039	2118.33	566.945	147.644	-1.94109	2.77971e-25	3.21789e-24	yes	Npy1r	65	242.667	2.52467	9.60667	1.92794	2.07651e-10	2.02362e-09	yes
Stk17b	124	886.667	5.07233	31.2673	2.62393	2.60484e-49	3.01238e-48	yes	Apoc4	1	476	0.245667	103.635	8.72059	2.82772e-25	3.27138e-24	yes	Nell2	155	383.333	5.834	14.7513	1.33829	2.14587e-10	2.08785e-09	yes
Rab15	1254.67	261	53.9583	10.4183	-2.37272	2.64905e-49	3.06156e-48	yes	Sqle	2399.67	783	117.351	33.4407	-1.81115	2.83806e-25	3.28125e-24	yes	Haspin	138	40	5.62233	1.66767	-1.75334	2.15428e-10	2.0949e-09	yes
Ogfod1	1740.67	520.667	44.1247	11.2327	-1.97388	2.89555e-49	3.3443e-48	yes	Ccrl2	24.6667	256.667	1.58433	17.7453	3.48549	2.87894e-25	3.32638e-24	yes	Sec14l2	192	448.333	8.31467	19.9413	1.26203	2.19499e-10	2.13106e-09	yes
Arap1	531.333	2799	18.1557	95.1777	2.3902	2.99173e-49	3.45319e-48	yes	Leprot	666.667	2304	47.0883	142.016	1.59262	3.01395e-25	3.48016e-24	yes	Adamts16	35	127	0.805	2.971	1.88389	2.20377e-10	2.13845e-09	yes
Gjb6	1454.67	283	94.4603	15.45	-2.6121	3.25465e-49	3.75426e-48	yes	Slc8b1	106	551.333	5.06133	22.5077	2.15283	3.12443e-25	3.60544e-24	yes	Clca3a2	91.6667	14.3333	3.40633	0.644333	-2.40234	2.31264e-10	2.24049e-09	yes
Nkain2	1302	363.333	47.463	11.583	-2.03479	3.28863e-49	3.79104e-48	yes	Atp6v0a4	15	250	0.621667	8.853	3.83195	3.24995e-25	3.74789e-24	yes	Nefl	776.333	5396.67	26.7697	189.078	2.82031	2.36823e-10	2.29067e-09	yes
Csmd3	394.333	37.3333	4.363	0.351333	-3.63441	3.38695e-49	3.9019e-48	yes	Abhd8	1995	666.333	134.847	39.5263	-1.77044	3.36138e-25	3.87392e-24	yes	Lypd1	26.6667	114	1.69167	6.66733	1.97866	2.39463e-10	2.31498e-09	yes
Pnma2	442.333	30	12.4477	0.672333	-4.21055	3.3918e-49	3.905e-48	yes	Pax8	203.333	17.6667	11.5867	0.883667	-3.71282	3.48117e-25	4.00944e-24	yes	Car3	15	86	1.00433	6.007	2.58041	2.56199e-10	2.47413e-09	yes
Tmem63c	429	21.6667	17.7203	0.736333	-4.5889	3.50965e-49	4.03811e-48	yes	Fhod3	566.333	140.333	14.465	3.20233	-2.17537	3.50158e-25	4.03037e-24	yes	Astn2	231	509.667	5.539	12.424	1.16543	2.69707e-10	2.59804e-09	yes
Hdac1	383.333	1512.67	25.292	85.043	1.74951	3.59535e-49	4.13408e-48	yes	Ednra	105	533	3.924	17.188	2.131	3.61229e-25	4.15516e-24	yes	Dab1	49	155.333	1.90033	4.995	1.39423	2.69746e-10	2.59804e-09	yes
Chaf1b	9	332.667	0.742	19.9727	4.75046	3.83463e-49	4.40641e-48	yes	Sybu	907.333	304.667	39.0613	11.6143	-1.74983	3.6399e-25	4.18426e-24	yes	Tmtc1	509	1005	7.00533	14.13	1.01224	2.70515e-10	2.60407e-09	yes
Fam120a	1629.33	5433.33	43.0903	121.881	1.50004	4.19515e-49	4.81763e-48	yes	Gdf10	85.3333	578.333	2.203	12.887	2.54838	3.65823e-25	4.20268e-24	yes	Pygo1	175.333	374.667	2.54133	5.54933	1.12673	2.73062e-10	2.62719e-09	yes
Calm3	20986	6311	1227.58	315.589	-1.9597	4.28176e-49	4.91397e-48	yes	Zfp941	331.667	56.3333	12.2467	1.752	-2.80531	3.73269e-25	4.2855e-24	yes	Slc45a1	53.3333	174.333	1.792	6.18967	1.78829	2.76371e-10	2.65762e-09	yes
Cflar	387.667	1707	9.88867	35.796	1.85595	4.96531e-49	5.69484e-48	yes	Luzp1	3233.33	1212.33	59.0237	19.4003	-1.60521	3.81017e-25	4.37168e-24	yes	Dok7	53.3333	175	2.51567	7.486	1.57325	2.8287e-10	2.71723e-09	yes
Pgr	329	8	6.41267	0.147667	-5.44051	5.58405e-49	6.40042e-48	yes	Csdc2	2870	1049.67	155.97	49.6033	-1.65276	4.01546e-25	4.60431e-24	yes	Dusp2	102.667	24	7.23633	1.73267	-2.06226	2.90571e-10	2.78825e-09	yes
Gpr65	12.3333	358	0.824667	19.754	4.58219	5.90686e-49	6.76614e-48	yes	Pmepa1	904	2523	34.833	93.6757	1.42722	4.04906e-25	4.6399e-24	yes	Ccn1	2461.33	952.333	137.575	55.7173	-1.30402	2.90779e-10	2.78877e-09	yes
Coro1c	1590.33	5468.33	61.1597	178.566	1.54581	6.10701e-49	6.99098e-48	yes	Fap	7	191	0.472667	8.45967	4.16171	4.09016e-25	4.68403e-24	yes	Dlgap3	39	153.333	1.11867	4.84633	2.11511	2.90967e-10	2.7891e-09	yes
Dynlt1f	182.333	1103	31.6123	163.403	2.36987	6.23895e-49	7.1375e-48	yes	Aldoc	27722.3	9389.67	1930.04	571.461	-1.75591	4.12383e-25	4.71961e-24	yes	Sema3f	321.333	119.333	14.6923	6.189	-1.24729	3.03525e-10	2.9064e-09	yes
Tnfsf12	145	814.667	14.0297	66.6553	2.24824	7.58146e-49	8.66788e-48	yes	Ctnnd1	1356.33	3937	34.8873	88.4793	1.34264	4.33965e-25	4.96347e-24	yes	Dync2li1	157.333	343	13.2463	29.687	1.16424	3.10492e-10	2.96842e-09	yes
Ptprd	2995	859.333	64.547	16.6097	-1.95833	8.10832e-49	9.26438e-48	yes	Lrp5	270	1176.33	7.05	26.5397	1.91246	4.36336e-25	4.98744e-24	yes	Sned1	1046.33	2192	13.188	28.1803	1.09546	3.15455e-10	3.0111e-09	yes
Lrg1	51.3333	707	4.96867	57.1207	3.52308	8.30056e-49	9.47805e-48	yes	Actb	14273.3	39341.7	1024.76	2416.62	1.23771	4.38606e-25	5.01023e-24	yes	Slc6a7	6	64	0.202333	2.22267	3.45749	3.18412e-10	3.03772e-09	yes
Galc	560.333	1813.67	23.6443	64.9937	1.4588	8.38192e-49	9.5649e-48	yes	Niban1	265.333	927.667	5.522	16.6567	1.59284	4.99669e-25	5.70417e-24	yes	Clcn2	270.333	583.667	9.81667	21.721	1.14579	3.29944e-10	3.14278e-09	yes
Lig1	240.667	1092	10.911	42.6097	1.9654	8.73576e-49	9.96241e-48	yes	Zmat4	514.333	63.3333	16.9813	1.79533	-3.24163	5.18931e-25	5.92032e-24	yes	Bok	434	202.333	34.0973	16.949	-1.00846	3.40372e-10	3.23702e-09	yes
Acot7	4993	1563.33	459.65	122.187	-1.91144	1.16089e-48	1.32307e-47	yes	Ndst4	425	55	7.884	2.19367	-1.84558	5.47256e-25	6.23955e-24	yes	Agap2	186.333	417.667	4.27967	10.0433	1.23067	3.56014e-10	3.38223e-09	yes
Prrt1	608.667	77.3333	42.139	4.51433	-3.22257	1.2147e-48	1.38352e-47	yes	Gnpda1	396	1273.33	25.8213	68.358	1.40455	5.5139e-25	6.28272e-24	yes	Slc9a2	83.6667	220.667	1.93	5.18567	1.42593	3.62569e-10	3.4409e-09	yes
Hectd4	3540	886	41.317	9.07133	-2.18735	1.35752e-48	1.54521e-47	yes	Rab34	204.667	870.333	20.1983	72.363	1.84102	5.7417e-25	6.53818e-24	yes	AA467197	100.333	24	14.624	3.582	-2.0295	3.71996e-10	3.52851e-09	yes
Ubxn2a	1284.33	335	72.4137	18.2993	-1.98447	1.3757e-48	1.56492e-47	yes	Pgbd5	796.333	246	38.416	10.0253	-1.93806	5.81509e-25	6.61759e-24	yes	Pax6	53.6667	183.667	2.226	8.19833	1.88088	3.87188e-10	3.66687e-09	yes
Rras2	129.667	658	7.69133	33.089	2.10505	1.55055e-48	1.76272e-47	yes	Kif1b	19865	8885.33	272.582	107.226	-1.34604	5.98393e-25	6.80545e-24	yes	Slc16a11	20.6667	99	1.909	7.14133	1.90338	3.87927e-10	3.67194e-09	yes
Rfc5	79	553.333	4.58767	23.567	2.36094	1.57493e-48	1.7893e-47	yes	Trim12c	54	385	2.41167	13.4333	2.47771	5.99607e-25	6.81498e-24	yes	Rimklb	180.333	385.333	5.634	11.87	1.07509	3.90999e-10	3.69909e-09	yes
Dtl	9.66667	319	0.312667	8.64433	4.78906	1.66369e-48	1.88896e-47	yes	Ifnar1	640.333	2038.67	22.4913	63.014	1.4863	6.00577e-25	6.82172e-24	yes	Grin2c	5	59.6667	0.121333	1.612	3.7318	3.91211e-10	3.69917e-09	yes
Selp	6.33333	352	0.337	11.763	5.12536	1.73459e-48	1.96823e-47	yes	Tmem178b	829.333	273.667	40.8663	12.733	-1.68234	6.20895e-25	7.0481e-24	yes	Robo1	450.667	934	7.31033	15.76	1.10826	3.93601e-10	3.71983e-09	yes
Lrrc24	350.667	14	24.6113	0.851333	-4.85345	1.8496e-48	2.09741e-47	yes	Hhex	30.6667	227.333	2.38933	15.952	2.73906	6.29106e-25	7.13683e-24	yes	Gnpnat1	598.333	302.333	30.0103	14.2233	-1.0772	3.99645e-10	3.77302e-09	yes
Zfp36	121.667	1003.67	5.92267	41.8137	2.81966	1.86835e-48	2.11735e-47	yes	Prss35	109.333	594.667	4.28867	20.205	2.23611	6.78593e-25	7.69341e-24	yes	Cblb	986.667	485.333	20.8603	9.703	-1.10426	4.10727e-10	3.87563e-09	yes
Wasf2	642.333	2507.67	19.543	66.1857	1.75987	1.94162e-48	2.199e-47	yes	Dab1	600.667	155.333	19.0173	4.995	-1.92876	7.54899e-25	8.55316e-24	yes	Rimkla	77	273	2.18767	7.87733	1.84831	4.18001e-10	3.93811e-09	yes
Cip2a	30.3333	440.667	1.02767	12.655	3.62226	1.97883e-48	2.23974e-47	yes	Cmtm6	762.667	2390	30.279	82.5843	1.44755	7.78314e-25	8.81295e-24	yes	Gm43302	132	470.333	3.515	12.6173	1.84381	4.19432e-10	3.94856e-09	yes
Slc6a6	1896.67	7147	43.5037	140.495	1.69131	2.07203e-48	2.34377e-47	yes	Htr1a	191	16.3333	5.75267	0.431	-3.73847	8.06041e-25	9.1212e-24	yes	Atosa	182.667	413.333	5.074	11.9143	1.2315	4.19546e-10	3.94856e-09	yes
Gnaz	667.667	121.333	25.5257	3.92767	-2.7002	2.26971e-48	2.56576e-47	yes	Cabp7	2935.67	766.667	148.294	34.32	-2.11134	8.08683e-25	9.14539e-24	yes	Erfe	56	6	2.66	0.311667	-3.09335	4.21591e-10	3.9637e-09	yes
Bicc1	324.667	3211	8.71967	73.2373	3.07023	2.66529e-48	3.01106e-47	yes	Arhgap36	686.333	197	30.872	7.60167	-2.02191	8.44715e-25	9.54691e-24	yes	Hrk	10.3333	69.6667	0.218	1.514	2.79597	4.29002e-10	4.0292e-09	yes
Herc3	1768	319.333	65.9907	10.0127	-2.72044	2.89368e-48	3.26704e-47	yes	Celsr2	3377.33	1242.33	47.161	17.99	-1.3904	8.65701e-25	9.77799e-24	yes	Hk3	1739.67	821.667	62.7663	29.958	-1.06705	4.33823e-10	4.07237e-09	yes
Rassf1	163.333	784.667	12.7013	51.6527	2.02386	2.91974e-48	3.2944e-47	yes	Parp6	961.333	328	48.843	15.3887	-1.66628	8.67968e-25	9.7975e-24	yes	Pyroxd2	121	280	4.518	10.9743	1.28038	4.48412e-10	4.20496e-09	yes
Sod2	3848.33	1221.33	90.6203	24.7907	-1.87004	2.92869e-48	3.30245e-47	yes	Camk1d	2185.33	766	42.6387	12.922	-1.72233	8.82561e-25	9.95602e-24	yes	Peli3	26.3333	106	0.747333	3.065	2.03606	4.7367e-10	4.43723e-09	yes
Clasp2	4748	1620	130.866	41.0787	-1.67163	3.0808e-48	3.47181e-47	yes	Fgf11	695	180.667	31.0377	7.213	-2.10535	9.01368e-25	1.01618e-23	yes	Kcnj3	33.6667	134.333	1.16433	4.103	1.81718	4.82876e-10	4.52028e-09	yes
F10	3	554	0.428667	34.0893	6.31332	3.13157e-48	3.52681e-47	yes	Ptprn	3629.33	1026.33	144.746	33.746	-2.10074	9.10532e-25	1.02588e-23	yes	Tfpi2	447.333	159.333	33.7787	12.202	-1.46899	4.83283e-10	4.52028e-09	yes
Cyp4v3	231.667	1188.67	8.18	35.5753	2.1207	3.57469e-48	4.02336e-47	yes	Myo1g	20	283.667	0.973	10.381	3.41536	9.53877e-25	1.07405e-23	yes	Steap1	93.6667	19	8.70333	1.82033	-2.25737	4.89745e-10	4.57836e-09	yes
Tcf12	954.333	2773.67	34.04	82.966	1.28529	4.49712e-48	5.05842e-47	yes	Lrrc4c	596	173.333	22.6273	5.791	-1.96618	9.70636e-25	1.09224e-23	yes	Slc35f3	8.66667	64.3333	0.401333	2.74167	2.77218	4.94851e-10	4.6237e-09	yes
Dtx1	1196	156	39.7283	4.37733	-3.18204	4.97706e-48	5.59478e-47	yes	B3gat1	1349.33	471	51.256	15.3847	-1.73623	9.96226e-25	1.12034e-23	yes	Lrrc3	98.6667	270.667	2.64367	7.388	1.48264	4.95667e-10	4.62895e-09	yes
Fn3k	398.667	16.3333	48.2593	1.517	-4.99151	5.35895e-48	6.02033e-47	yes	Hmgcs1	12637	3503	530.161	130.207	-2.02562	1.00491e-24	1.1294e-23	yes	Per3	149.333	362.333	2.89267	7.21533	1.31867	5.1262e-10	4.77988e-09	yes
Anp32b	1054.67	3414.33	82.4123	227.828	1.46701	5.47433e-48	6.14613e-47	yes	Pfn2	8034.67	3256.33	520.66	187.235	-1.47549	1.08259e-24	1.21595e-23	yes	Paqr9	37.6667	159.667	0.511333	2.26133	2.14484	5.20956e-10	4.85262e-09	yes
Sms	2288.67	702	83.0207	29.2883	-1.50314	5.53065e-48	6.20551e-47	yes	Enah	3038.67	1208.67	65.3263	27.6567	-1.24004	1.08629e-24	1.21935e-23	yes	Arhgap5	867.333	1840.67	21.847	47.3553	1.11609	5.27272e-10	4.90642e-09	yes
Rps27l	248.667	1369.33	66.359	311.525	2.23098	5.56583e-48	6.24111e-47	yes	Cyb5r3	1734.67	4589.33	105.916	243.554	1.20131	1.13263e-24	1.27029e-23	yes	Casp7	618	298.333	29.9317	14.902	-1.00617	5.60915e-10	5.20879e-09	yes
Cdh8	507.333	25	18.9073	0.994667	-4.24859	5.93389e-48	6.64971e-47	yes	Tpt1	11940	28540.7	1369.21	2857.32	1.06131	1.13307e-24	1.27029e-23	yes	Pcdhga1	68.3333	190.333	1.78067	4.84533	1.44418	5.7645e-10	5.34484e-09	yes
Tmem151a	3582.33	1125.67	121.163	32.6817	-1.89039	6.0598e-48	6.7866e-47	yes	Eif5a2	2275.67	529	60.7447	12.4697	-2.28433	1.18205e-24	1.32438e-23	yes	Dusp15	246.667	515.667	16.3727	33.1717	1.01866	5.83418e-10	5.40668e-09	yes
Lamc1	1046	5953.67	18.5013	89.42	2.27297	6.43498e-48	7.20232e-47	yes	Btg2	120.333	491.333	5.88133	21.0817	1.84177	1.18826e-24	1.33051e-23	yes	Clec2l	39.3333	142	3.13067	11.7277	1.90537	5.89371e-10	5.45906e-09	yes
Adgrl4	352	1427	16.8737	56.2753	1.73773	7.06364e-48	7.90105e-47	yes	Erbb2	80	497	2.16333	11.5727	2.41939	1.28332e-24	1.43606e-23	yes	Wfdc17	1088.33	494.667	231.05	108.39	-1.09198	6.01952e-10	5.56422e-09	yes
Gprc5b	7299	1670	251.461	42.0833	-2.57901	7.65169e-48	8.55353e-47	yes	Ccdc102a	37.3333	254.333	2.17933	13.047	2.58176	1.30546e-24	1.45994e-23	yes	Plxdc1	474	944.333	18.905	38.4247	1.02326	6.09075e-10	5.62433e-09	yes
Ccl3	7.33333	327.333	1.28433	48.5883	5.24152	8.64516e-48	9.65812e-47	yes	Dennd4c	304.333	1009	5.40033	15.158	1.48896	1.34041e-24	1.4981e-23	yes	Loxl4	144	39.3333	4.4	1.22167	-1.84865	6.18493e-10	5.70549e-09	yes
Map2k4	3316.67	1161.33	151.359	37.952	-1.99572	8.86444e-48	9.89698e-47	yes	Igfbpl1	1.66667	231.333	0.0796667	9.457	6.89126	1.51291e-24	1.68985e-23	yes	Plpp4	16.3333	92.6667	1.48267	8.76033	2.56279	6.23918e-10	5.75177e-09	yes
Nhlrc3	191.333	915	5.11833	20.689	2.01512	9.70109e-48	1.08244e-46	yes	Nmnat2	2092.67	647	61.3537	16.587	-1.8871	1.52874e-24	1.70648e-23	yes	Snx32	135.333	331.667	8.995	22.702	1.33562	6.40667e-10	5.89804e-09	yes
Entrep2	428.333	37.3333	11.9877	1.01567	-3.56105	1.14369e-47	1.27534e-46	yes	Trim47	51.6667	398	3.148	21.235	2.75394	1.6056e-24	1.79117e-23	yes	Pcdh8	10.3333	75.6667	0.317	2.294	2.85531	6.50665e-10	5.98401e-09	yes
Pgd	878.667	3691.33	53.1803	189.738	1.83505	1.16764e-47	1.30124e-46	yes	Slc35g1	48.3333	329.333	1.86067	11.111	2.5781	1.60825e-24	1.79303e-23	yes	Lrfn5	11.6667	81.3333	0.365333	2.59367	2.82771	6.5469e-10	6.01492e-09	yes
Pgbd5	796.333	152.333	38.416	6.53967	-2.55442	1.24372e-47	1.38517e-46	yes	Cacna2d2	999	151.667	26.5477	3.63767	-2.8675	1.67574e-24	1.86712e-23	yes	Clca3a1	87.6667	17.3333	2.856	0.575333	-2.31153	6.571e-10	6.03401e-09	yes
Tor4a	102	801.333	4.179	28.0333	2.74591	1.28726e-47	1.43278e-46	yes	Psmb9	32.6667	430	3.314	36.9407	3.47856	1.73551e-24	1.93253e-23	yes	Sox21	41.3333	136.667	1.23733	4.234	1.77479	6.64634e-10	6.09394e-09	yes
Xbp1	1078	3220.33	70.9307	196.326	1.46877	1.3088e-47	1.45586e-46	yes	Kcnk3	465	111.333	16.383	3.44233	-2.25074	1.73742e-24	1.93347e-23	yes	Atad5	207.333	75.6667	3.25267	1.21867	-1.41632	6.93786e-10	6.34839e-09	yes
Nxph4	348.333	13.3333	27.717	0.909333	-4.92982	1.49171e-47	1.6583e-46	yes	Pttg1ip	1335.33	3941	78.688	201.203	1.35444	1.73966e-24	1.93477e-23	yes	Chic1	130.333	299.333	2.015	4.77967	1.24613	6.94769e-10	6.35417e-09	yes
Osmr	117.667	1235	2.91867	25.9633	3.15309	1.55252e-47	1.72485e-46	yes	Gnai2	4223.33	11350.7	257.893	605.223	1.23069	1.78623e-24	1.98535e-23	yes	Fads6	117.667	264.333	2.722	6.26133	1.2018	7.00517e-10	6.40352e-09	yes
D130043K22Rik	350.667	10.3333	9.51033	0.251	-5.24374	1.65385e-47	1.83629e-46	yes	Acly	7763	3544.67	240.206	96.3133	-1.31846	1.79903e-24	1.99834e-23	yes	Gm19935	33.6667	133	3.871	15.937	2.0416	7.12905e-10	6.51347e-09	yes
Cdk6	44.3333	612.667	0.58	9.80433	4.07929	1.70664e-47	1.89374e-46	yes	Spg21	518.333	1616	36.2643	87.71	1.27419	1.80887e-24	2.00805e-23	yes	Nid2	1720.33	3614.67	40.4273	86.7167	1.10098	7.23351e-10	6.60558e-09	yes
Ccdc85a	721	152.667	23.9873	4.033	-2.57235	1.71823e-47	1.90544e-46	yes	Rasgrp2	348.667	67.6667	48.9757	8.45267	-2.53459	1.86241e-24	2.06622e-23	yes	Clba1	135.667	306	8.67333	19.5993	1.17615	7.26597e-10	6.63189e-09	yes
Madd	2218.33	656.667	51.711	13.2753	-1.96172	1.84355e-47	2.04316e-46	yes	Kcnh1	441.667	73	8.22367	1.255	-2.71209	1.9003e-24	2.10697e-23	yes	Rnase1	6	59.3333	0.692667	6.97667	3.3323	7.29621e-10	6.65614e-09	yes
Npm1	2238.67	7244.67	212.935	579.253	1.44378	1.91215e-47	2.11789e-46	yes	Dusp6	354	1099	17.0423	45.891	1.42909	2.00201e-24	2.21838e-23	yes	Lrrc4b	394	821.333	17.297	37.296	1.1085	7.42318e-10	6.76516e-09	yes
Tln1	1905	9403	30.509	127.982	2.06864	2.00421e-47	2.21849e-46	yes	Ppp2r2c	5297.33	1934.33	173.954	55.648	-1.6443	2.02897e-24	2.24687e-23	yes	Chat	6.33333	66	0.365667	2.80367	2.93871	7.57431e-10	6.89943e-09	yes
Map3k13	496.333	62.6667	7.76233	0.840667	-3.20688	2.0214e-47	2.23615e-46	yes	Bin2	127.333	617	8.50433	35.8703	2.07652	2.03746e-24	2.2549e-23	yes	Aaas	498.667	240.333	31.6087	15.6163	-1.01726	7.60505e-10	6.92395e-09	yes
Paqr6	701	42.6667	58.313	3.60667	-4.01508	2.09898e-47	2.32055e-46	yes	Cadm3	5846	2082	226.078	72.4703	-1.64136	2.04447e-24	2.26127e-23	yes	Lmtk3	67.6667	182	1.902	5.681	1.57863	7.7203e-10	7.02536e-09	yes
Adap2	37.6667	396	3.381	27.3007	3.01341	2.13047e-47	2.35393e-46	yes	Grin2d	453.667	104	11.224	2.287	-2.29506	2.09002e-24	2.31024e-23	yes	Slitrk1	36.3333	127.333	0.770333	2.79367	1.85861	8.1068e-10	7.35493e-09	yes
Rapgefl1	551	52.3333	15.2003	1.217	-3.6427	2.16688e-47	2.3927e-46	yes	Fgf2	202.667	718.667	5.093	14.7217	1.53135	2.10279e-24	2.32295e-23	yes	Svep1	496	1052.33	4.86867	10.5687	1.11819	8.11722e-10	7.3607e-09	yes
Cacnb1	625.333	72.3333	28.251	3.3	-3.09776	2.43621e-47	2.68845e-46	yes	Car13	211	933.667	12.3347	47.5387	1.94638	2.20149e-24	2.43049e-23	yes	Pitpnm3	28.3333	108.667	0.495	1.94867	1.97699	8.28893e-10	7.51264e-09	yes
Cacng3	300.667	13.3333	17.0403	0.750667	-4.50464	2.45099e-47	2.70312e-46	yes	Cracd	1602.33	593.333	43.2787	13.565	-1.67377	2.20308e-24	2.43077e-23	yes	Pou2f2	134.667	300.667	2.80567	6.03367	1.10469	8.43665e-10	7.64271e-09	yes
Vwa5b2	356	16.6667	14.7303	0.554	-4.73276	2.54353e-47	2.80346e-46	yes	Chsy1	201	782	6.478	21.8643	1.75496	2.26883e-24	2.50179e-23	yes	Chrm2	13	81.6667	0.261	1.69867	2.70228	8.45456e-10	7.65511e-09	yes
Ifitm2	265.333	2249.67	54.8903	391.809	2.83553	2.55816e-47	2.81787e-46	yes	Nckipsd	1247.67	409.667	49.6647	15.1147	-1.71627	2.31119e-24	2.54695e-23	yes	Agtr2	21	115.667	0.74	4.14367	2.48531	8.7129e-10	7.88116e-09	yes
Enpp2	8290.33	2340.33	381.744	91.619	-2.05889	2.66838e-47	2.93749e-46	yes	Kcnj9	276.667	41	10.8487	1.29033	-3.0717	2.34596e-24	2.58369e-23	yes	Hrob	104	21.3333	4.63367	0.975333	-2.24819	8.75149e-10	7.91211e-09	yes
Ncapg	10.6667	441.333	0.386333	13.772	5.15575	2.68516e-47	2.95417e-46	yes	Slc6a9	4818.67	1773.67	255.151	82.9733	-1.62063	2.45402e-24	2.69991e-23	yes	Srrm3	10.6667	66.6667	0.311333	3.737	3.58535	8.83267e-10	7.98153e-09	yes
Pabpc4	392.333	1406	17.481	53.204	1.60575	2.72145e-47	2.99227e-46	yes	Man1a	481	1529.67	12.7493	36.3293	1.51071	2.45447e-24	2.69991e-23	yes	Cabp1	54	171.667	6.368	20.452	1.68333	9.22599e-10	8.32036e-09	yes
Efemp2	223.667	1434.67	20.041	105.323	2.39379	3.30899e-47	3.63454e-46	yes	Atp6v1b2	11963.3	5060	567.457	209.833	-1.43527	2.50904e-24	2.75826e-23	yes	Paxx	86	230.333	9.94267	27.5053	1.46801	9.38871e-10	8.4587e-09	yes
Gtse1	12.3333	336.667	0.626333	14.5077	4.53374	3.30961e-47	3.63454e-46	yes	Hsp90aa1	18272.3	6410.33	839.111	257.992	-1.70153	2.67964e-24	2.94403e-23	yes	Serpini1	69.3333	193	2.33533	5.69667	1.28649	9.56772e-10	8.6157e-09	yes
Sntg1	304.333	12	12.0803	0.488333	-4.62865	3.32999e-47	3.6547e-46	yes	Actl6b	346	52.3333	33.5027	4.689	-2.83692	2.80797e-24	3.08315e-23	yes	Clxn	32.3333	124	1.37267	5.321	1.95472	9.82259e-10	8.84082e-09	yes
Jak3	74	561	2.494	16.3343	2.71137	3.3389e-47	3.66226e-46	yes	Mta2	583	1793.33	25.009	66.8233	1.4179	2.84715e-24	3.12428e-23	yes	Pdgfrl	388	853	28.795	64.162	1.1559	9.93664e-10	8.9346e-09	yes
Dera	60.3333	491.667	4.66433	32.9307	2.81969	3.38395e-47	3.70943e-46	yes	Sc5d	1613	537	87.398	24.9273	-1.80987	2.94511e-24	3.22981e-23	yes	Tmem59l	141.667	412.667	10.6843	32.439	1.60223	1.01096e-09	9.07665e-09	yes
Grin3a	925.667	138.667	16.851	2.11633	-2.9932	3.81464e-47	4.17901e-46	yes	Nxph4	348.333	59.3333	27.717	4.16033	-2.736	2.99098e-24	3.27814e-23	yes	Cspg4b	45.3333	141.667	0.623	2.006	1.68702	1.08642e-09	9.72044e-09	yes
Dlgap1	1111.67	232	28.222	6.14167	-2.20012	3.86081e-47	4.22702e-46	yes	Lman1	573.667	1644.67	18.5357	48.3053	1.38188	3.03878e-24	3.32851e-23	yes	Marco	371.667	17.3333	22.6717	1.04067	-4.44531	1.09139e-09	9.76007e-09	yes
Gnpda1	396	1644.33	25.8213	85.013	1.71912	3.89351e-47	4.26025e-46	yes	Tmx4	3941	1441	96.638	30.8677	-1.64649	3.0615e-24	3.35137e-23	yes	B3gat1	218	471	6.845	15.3847	1.16837	1.10211e-09	9.84861e-09	yes
Gabrb2	398	19.6667	13.51	0.554	-4.608	4.02119e-47	4.3973e-46	yes	Parvb	514	1599.33	18.4543	49.778	1.43155	3.32686e-24	3.63966e-23	yes	Itprip	484	233.333	15.771	7.25033	-1.12115	1.10237e-09	9.84861e-09	yes
Rin2	519.667	1762.33	15.301	43.7023	1.51408	4.03731e-47	4.41226e-46	yes	Pla1a	31.3333	316.333	2.17667	18.701	3.10292	3.38777e-24	3.70405e-23	yes	Mxra8	1222.67	2598.33	66.228	145.084	1.13138	1.10451e-09	9.86282e-09	yes
9330159F19Rik	691.667	124.667	24.681	3.88567	-2.66717	4.21991e-47	4.60903e-46	yes	Slc16a2	466.333	1981.67	15.0943	55.6697	1.88288	3.45693e-24	3.7774e-23	yes	Rnf227	86.3333	218	5.96833	14.096	1.23989	1.13676e-09	1.01408e-08	yes
Pira12	5	387	0.316333	20.643	6.02806	4.75184e-47	5.18688e-46	yes	Plscr3	233	897.667	18.992	61.061	1.68486	3.7321e-24	4.07561e-23	yes	Sgms2	624.667	332.333	16.1953	7.665	-1.07922	1.18154e-09	1.053e-08	yes
Tlr1	34.3333	393.333	1.61867	15.5663	3.26555	4.89464e-47	5.33953e-46	yes	Fgf14	457.667	108	17.2043	3.577	-2.26595	3.78463e-24	4.13049e-23	yes	Ly86	850.333	1669.33	85.6627	172.958	1.01369	1.18555e-09	1.05604e-08	yes
Rin1	20.6667	368.333	1.167	13.27	3.50729	5.39164e-47	5.87816e-46	yes	Fcgrt	548.333	3026	42.6143	203.448	2.25525	3.8858e-24	4.23836e-23	yes	Nlgn1	92	235.333	2.35433	6.047	1.3609	1.1936e-09	1.06218e-08	yes
Nrg3	303.667	7.33333	12.7127	0.220667	-5.84825	5.65997e-47	6.16698e-46	yes	Atoh8	35.6667	271.333	2.08833	15.5627	2.89767	4.34522e-24	4.7366e-23	yes	Elmod1	44	157.667	1.90067	7.11	1.90334	1.19945e-09	1.06685e-08	yes
Col16a1	322.333	2376.67	10.2517	65.992	2.68643	5.96398e-47	6.49431e-46	yes	Kdelr3	85.6667	471	8.17867	39.005	2.25372	4.50262e-24	4.90523e-23	yes	Gdap1	91	268.667	2.71467	8.05	1.56821	1.23842e-09	1.09997e-08	yes
Gprin1	427	49	13.754	1.33533	-3.36458	5.97286e-47	6.50006e-46	yes	Gla	304.667	988	13.3997	39.2967	1.55221	4.72052e-24	5.13952e-23	yes	Hoxd9	33	130	1.744	7.171	2.03977	1.2385e-09	1.09997e-08	yes
Sting1	93.3333	762.333	5.89633	39.4813	2.74328	6.3766e-47	6.93528e-46	yes	Tmx2	6691	2667.67	443.742	155.232	-1.5153	4.72402e-24	5.14024e-23	yes	Gpr88	15.3333	84.6667	0.499	2.86733	2.5226	1.25876e-09	1.11633e-08	yes
Cbln2	313	14.3333	18.8283	0.745	-4.65952	7.26885e-47	7.90094e-46	yes	Efnb1	130.667	983.333	5.42167	35.1553	2.69694	4.83741e-24	5.26047e-23	yes	Wnt7a	48.6667	156.667	1.74033	5.78767	1.73362	1.30335e-09	1.15418e-08	yes
Chat	325.667	6.33333	23.7503	0.365667	-6.02127	7.46707e-47	8.11153e-46	yes	Plekha2	281.667	1017.33	9.456	30.6177	1.69506	5.0675e-24	5.50737e-23	yes	Chrnb2	75.6667	228.667	1.40733	4.281	1.60498	1.43332e-09	1.26557e-08	yes
Parp6	961.333	230.333	48.843	11.807	-2.04851	7.91566e-47	8.59367e-46	yes	Gnaz	667.667	150.333	25.5257	5.08867	-2.32659	5.07204e-24	5.509e-23	yes	Crem	354.333	166.667	36.6117	16.9447	-1.11147	1.44573e-09	1.27466e-08	yes
Tmem8b	870.333	170.333	23.497	3.87067	-2.60182	8.08805e-47	8.77556e-46	yes	Filip1l	73.6667	404.667	2.97333	14.6503	2.30078	5.26126e-24	5.71109e-23	yes	Ighg2c	3.33333	47.3333	0.344333	5.008	3.86236	1.46797e-09	1.29238e-08	yes
Bri3bp	1814.67	478.333	37.8593	9.267	-2.03047	1.16071e-46	1.25862e-45	yes	Dcaf12l1	546.667	148	20.9097	4.96933	-2.07305	5.35397e-24	5.80826e-23	yes	Relb	200.333	428	10.9247	23.309	1.0933	1.47782e-09	1.29979e-08	yes
Adgra1	759	157.667	21.451	3.776	-2.50611	1.22248e-46	1.32481e-45	yes	Ccr1	32.3333	365	1.56967	15.008	3.2572	5.36025e-24	5.81159e-23	yes	Dusp26	54.3333	220.667	3.63667	14.428	1.98818	1.48407e-09	1.30466e-08	yes
Fbxo9	2074	514.667	133.463	30.726	-2.1189	1.37645e-46	1.49076e-45	yes	Crlf1	14.6667	200.667	1.47	18.066	3.61939	5.39135e-24	5.84181e-23	yes	Inhbb	386	156.667	10.3273	4.35533	-1.24561	1.48923e-09	1.30793e-08	yes
Stk38	313.333	1224.67	14.1223	44.0443	1.64098	1.43986e-46	1.55851e-45	yes	Nhlrc3	191.333	770.333	5.11833	17.8487	1.80207	5.43317e-24	5.88361e-23	yes	Clec14a	986.333	396.333	24.4513	10.062	-1.281	1.50681e-09	1.32208e-08	yes
Ankrd45	415	27	15.8577	0.870667	-4.18692	1.45677e-46	1.57587e-45	yes	Hgf	16.3333	197.333	0.764333	7.425	3.28012	5.53219e-24	5.98725e-23	yes	Sptssb	30.3333	110	2.20967	8.68633	1.97492	1.57414e-09	1.37782e-08	yes
Laptm4b	3484.67	1069.33	246.459	64.6083	-1.93156	1.61415e-46	1.74508e-45	yes	Rnd1	677.333	174.333	42.9873	10.4603	-2.03898	5.56228e-24	6.01623e-23	yes	Cxcl1	82.6667	229.667	9.949	28.3813	1.51232	1.60154e-09	1.40114e-08	yes
Ece2	868.667	154	37.1047	5.704	-2.70155	1.63224e-46	1.76358e-45	yes	Sez6	1049.33	348.333	33.9493	9.816	-1.79018	5.66784e-24	6.12675e-23	yes	Dhrs9	198.333	37.3333	5.266	1.02667	-2.35874	1.6772e-09	1.46521e-08	yes
Dnmt1	764	2452.67	19.134	52.6497	1.46029	1.65423e-46	1.78628e-45	yes	Snap47	4720	1572	361.339	102.438	-1.81861	5.72758e-24	6.18763e-23	yes	Gdnf	173.333	53.3333	5.365	1.70533	-1.65352	1.68694e-09	1.47301e-08	yes
Rab3il1	320.667	2220	16.2753	105.562	2.69734	1.70247e-46	1.83727e-45	yes	Tbx18	21	223	0.592667	5.60967	3.24262	5.83121e-24	6.29583e-23	yes	Baiap3	22.6667	122.333	0.643667	3.22	2.32268	1.70987e-09	1.49159e-08	yes
Cap1	3328.67	10532.7	174.209	462.149	1.40754	1.74648e-46	1.88363e-45	yes	Cdc42se1	970.667	2572	50.4297	124.06	1.29869	6.19781e-24	6.68765e-23	yes	Shpk	96	236	3.927	9.851	1.32684	1.71191e-09	1.49265e-08	yes
Plk4	55.6667	436.667	3.01367	14.4	2.25648	2.36749e-46	2.5519e-45	yes	Ywhag	18071.3	6485	685.91	216.575	-1.66315	6.35367e-24	6.85175e-23	yes	Dnajb13	37.6667	132	1.99967	7.21867	1.85197	1.71387e-09	1.49364e-08	yes
Nfatc1	155	797.333	4.67667	20.2677	2.11563	2.41915e-46	2.60602e-45	yes	Mrgprf	57	536	3.74967	30.199	3.00967	6.37413e-24	6.86973e-23	yes	Smarca1	191.333	393	5.112	11.17	1.12767	1.74083e-09	1.51568e-08	yes
Rps18-ps6	1967.33	8109.67	468.392	1647.43	1.81443	2.60768e-46	2.80745e-45	yes	Sec61b	213	674.333	50.7227	140.114	1.4659	6.38756e-24	6.88011e-23	yes	Col10a1	48.6667	3.33333	1.78367	0.126667	-3.81574	1.75661e-09	1.52796e-08	yes
Themis2	36	381	1.57767	14.1983	3.16986	2.84228e-46	3.05819e-45	yes	Idh3a	3405.33	1278.67	190.084	64.6143	-1.55671	6.4704e-24	6.96519e-23	yes	Stmn2	817.333	1952	45.0613	111.477	1.30678	1.80667e-09	1.56774e-08	yes
Parp12	165.333	863.333	6.895	30.6917	2.15422	2.94582e-46	3.16772e-45	yes	Ppargc1a	737.667	186.667	19.3713	4.05367	-2.25662	6.52747e-24	7.01891e-23	yes	Shisa8	31.6667	114.667	1.93767	5.67233	1.54962	1.83848e-09	1.59306e-08	yes
Nckipsd	1247.67	269	49.6647	9.129	-2.44369	2.98202e-46	3.20474e-45	yes	Dzip1	1119	400	36.5853	11.3747	-1.68544	6.52805e-24	7.01891e-23	yes	Car11	103.333	251.667	7.43433	18.6677	1.32827	1.85005e-09	1.60223e-08	yes
Mylk	267.333	1156	6.219	25.508	2.0362	2.99229e-46	3.21387e-45	yes	Calm3	20986	8424	1227.58	431.769	-1.50749	6.54062e-24	7.02825e-23	yes	Ftl1-ps1	192.333	73.3333	23.393	9.136	-1.35644	1.86177e-09	1.61093e-08	yes
Nkrf	1036	178.667	42.2723	6.20167	-2.76899	3.18001e-46	3.41346e-45	yes	Agpat2	35	303	3.16867	23.8673	2.91309	6.54489e-24	7.02868e-23	yes	Cry2	240.333	493.333	6.98367	14.6387	1.06773	1.87025e-09	1.61672e-08	yes
Nicn1	1545.33	418.333	97.3347	22.4143	-2.11853	3.22774e-46	3.46264e-45	yes	Lsm11	638.667	165	13.3783	3.29833	-2.02009	6.67511e-24	7.16428e-23	yes	Rasal1	19.3333	92.3333	0.678667	3.322	2.29128	1.8887e-09	1.63111e-08	yes
Fads2b	503	17.6667	30.3657	0.902333	-5.07264	3.24735e-46	3.48161e-45	yes	Rab39b	865.333	256.667	34.3187	8.903	-1.94663	6.75143e-24	7.2419e-23	yes	Iigp1c	15	92.6667	0.658	4.051	2.62212	1.90059e-09	1.6406e-08	yes
Prdx4	336.333	1568.67	45.6227	180.121	1.98115	3.4462e-46	3.69262e-45	yes	Slc9a6	2491	1040	88.4667	29.5387	-1.58253	7.15192e-24	7.66694e-23	yes	Skp2	250.667	97.3333	8.846	3.42067	-1.37075	1.9151e-09	1.65235e-08	yes
Prkcb	2269	607.667	115.06	25.1727	-2.19246	4.03489e-46	4.32084e-45	yes	Camk1	694	1886.67	62.2357	147.465	1.24456	7.23189e-24	7.74808e-23	yes	Fn3k	16.3333	90.6667	1.517	9.266	2.61073	1.937e-09	1.66886e-08	yes
Rinl	45.6667	384.333	2.365	15.453	2.70797	4.1447e-46	4.43581e-45	yes	Fdps	1984	593.333	216.562	56.542	-1.93738	7.26552e-24	7.77952e-23	yes	Micu3	101.333	240	4.83367	11.7607	1.28278	1.98463e-09	1.70746e-08	yes
Mypop	695.667	124.333	43.5843	6.68633	-2.70452	4.3315e-46	4.63298e-45	yes	Tenm4	1724.33	599.667	22.1927	6.40767	-1.79221	7.27757e-24	7.78782e-23	yes	Cd276	1311.33	605.667	46.288	21.4893	-1.10702	1.98604e-09	1.70786e-08	yes
Dnajb2	2170.67	573.667	163.651	35.776	-2.19356	4.79553e-46	5.12629e-45	yes	Rnh1	702	2213	54.631	146.995	1.42798	8.04053e-24	8.59919e-23	yes	Gm6377	248.667	85.3333	10.9163	3.77567	-1.53169	2.1186e-09	1.81669e-08	yes
Lrp1b	593.667	103.667	10.0503	1.53733	-2.70874	4.8289e-46	5.15891e-45	yes	Arpc2	1775.33	4483.33	167.357	368.736	1.13966	8.19731e-24	8.76169e-23	yes	Stra6	1264.33	541.667	55.5937	23.6417	-1.23359	2.13716e-09	1.83173e-08	yes
Pole	45	433	1.13567	11.6257	3.3557	5.63793e-46	6.01967e-45	yes	Adamts9	138.333	630.667	2.508	10.5037	2.06628	8.73508e-24	9.33098e-23	yes	Il6	49.3333	1.66667	5.03033	0.223667	-4.49123	2.16022e-09	1.84801e-08	yes
Eng	635.333	2862.33	25.2243	97.6547	1.95287	6.80538e-46	7.26188e-45	yes	Niban2	1041.67	3350	37.6027	105.288	1.48543	8.96525e-24	9.57121e-23	yes	Gcnt2	1351	628.333	38.7903	18.1087	-1.09902	2.18091e-09	1.86395e-08	yes
Cd5l	5.33333	1764.33	0.354	99.7127	8.13788	6.86017e-46	7.31603e-45	yes	Ttc39b	1402.67	471	30.7887	7.407	-2.05544	9.33661e-24	9.9618e-23	yes	Gdap1l1	68.6667	234.333	3.37667	13.6567	2.01593	2.20879e-09	1.886e-08	yes
Plcl1	1328	362	27.1183	6.31233	-2.10302	6.93534e-46	7.39184e-45	yes	Uba7	58.3333	425.333	2.443	15.3047	2.64725	9.70072e-24	1.03442e-22	yes	Pold1	337	159.333	11.11	5.40833	-1.0386	2.24369e-09	1.9131e-08	yes
Cdc6	12	308	0.439667	11.3423	4.68916	8.45709e-46	9.00844e-45	yes	Adap2	37.6667	276.333	3.381	18.6183	2.4612	1.03869e-23	1.10693e-22	yes	Kcnj11	4	48.3333	0.189667	2.207	3.54055	2.2535e-09	1.92056e-08	yes
Fam43b	339.667	10.6667	18.6383	0.509333	-5.19352	8.71329e-46	9.27589e-45	yes	Nol4	303.333	51.6667	12.6907	1.78133	-2.83274	1.0528e-23	1.12132e-22	yes	Insyn1	128.667	298.333	7.23267	17.236	1.25283	2.25897e-09	1.92431e-08	yes
Gria3	1133	247	33.0877	5.845	-2.50102	9.36228e-46	9.96092e-45	yes	Lin7b	192.667	18.6667	35.1823	2.96533	-3.56858	1.09588e-23	1.16651e-22	yes	Prodh	98.6667	271	5.417	14.499	1.42039	2.35837e-09	2.00617e-08	yes
Ccr2	26.3333	424.333	1.014	13.7337	3.75959	9.63768e-46	1.02479e-44	yes	Il1r1	91	487.667	2.54633	11.8093	2.21343	1.10977e-23	1.1806e-22	yes	Zdhhc22	17.6667	81.6667	0.728333	2.85567	1.97116	2.40335e-09	2.04155e-08	yes
Cyb5r3	1734.67	5619.67	105.916	291.167	1.45892	1.03703e-45	1.10204e-44	yes	Plekhf2	121	503.667	6.19367	19.754	1.67328	1.11375e-23	1.18414e-22	yes	Add2	328.667	794.333	5.86067	11.831	1.01344	2.4545e-09	2.08305e-08	yes
Fasn	8075	2616.67	126.235	34.336	-1.87831	1.0395e-45	1.10401e-44	yes	Lmna	706	2400.33	42.447	116.367	1.45495	1.1228e-23	1.19307e-22	yes	Clec2i	141.333	43.3333	8.92433	2.926	-1.60881	2.47247e-09	2.09732e-08	yes
Hip1	1207	3493.67	26.3907	71.2517	1.4329	1.04044e-45	1.10437e-44	yes	Rsrp1	450	2365.67	34.67	160.694	2.21256	1.14225e-23	1.21302e-22	yes	Lrrtm4	43.6667	134.667	1.753	5.03633	1.52255	2.54e-09	2.14958e-08	yes
Ankrd13d	602.333	76.3333	37.952	4.21567	-3.17034	1.06889e-45	1.1339e-44	yes	Tnfrsf13b	32	232	1.664	10.6257	2.67483	1.1637e-23	1.23508e-22	yes	Col4a6	354.333	814	6.09933	14.214	1.22059	2.55876e-09	2.16444e-08	yes
Cacna1g	741.667	141.667	12.2277	2.01333	-2.60249	1.16568e-45	1.23586e-44	yes	Lmo4	507	1426.67	45.617	113.066	1.30952	1.17203e-23	1.24319e-22	yes	Mcm8	138.667	41	4.92767	1.5	-1.71594	2.59864e-09	2.19613e-08	yes
Parp14	113.333	951.667	2.05533	14.8257	2.85065	1.28376e-45	1.36024e-44	yes	Parp12	165.333	827	6.895	29.6887	2.10629	1.33611e-23	1.4164e-22	yes	Kctd4	32	118	0.906667	3.47933	1.94017	2.6642e-09	2.24943e-08	yes
Cdkl5	670	138.333	11.1807	1.955	-2.51577	1.3468e-45	1.4262e-44	yes	A830018L16Rik	358.333	53	13.496	1.84567	-2.87032	1.41131e-23	1.49437e-22	yes	Slamf8	38.3333	187.667	2.61367	13.0787	2.32307	2.69655e-09	2.2757e-08	yes
Chchd10	1874.67	344	259.192	40.3203	-2.68444	1.35077e-45	1.42958e-44	yes	Ssr4	465	1283	78.7147	189.651	1.26864	1.42357e-23	1.50647e-22	yes	Slco2b1	905.333	1757.33	23.726	47.735	1.00858	2.72134e-09	2.29554e-08	yes
Eif4a2	11655.3	3671.33	912.231	254.166	-1.84363	1.36609e-45	1.44494e-44	yes	Patj	1446	365.667	51.125	10.671	-2.26033	1.45524e-23	1.53909e-22	yes	Spire2	51	170	2.573	8.64933	1.74914	2.798e-09	2.35692e-08	yes
Agtpbp1	2330.33	664.333	82.7147	22.5353	-1.87595	1.56559e-45	1.65498e-44	yes	Fdft1	3008.67	818.333	135.638	31.9573	-2.08554	1.45968e-23	1.54289e-22	yes	Slc30a3	8.66667	67.6667	0.545667	3.79667	2.79864	2.82832e-09	2.38136e-08	yes
Slc25a33	942.333	147.333	66.729	8.90933	-2.90492	1.567e-45	1.65552e-44	yes	Cmtm7	41.3333	268.333	5.61533	31.8053	2.50183	1.54169e-23	1.62862e-22	yes	Robo4	346	137.333	10.5933	4.35267	-1.28319	3.00929e-09	2.52786e-08	yes
Snx9	424.667	1788.33	17.089	61.4177	1.84559	1.72503e-45	1.82141e-44	yes	Rpl5	3169.33	7569	305.818	639.178	1.06355	1.5471e-23	1.63338e-22	yes	Inpp5k	437.667	852.333	19.2383	38.6787	1.00755	3.02421e-09	2.53922e-08	yes
Pla2g4e	365	4.66667	10.8937	0.121	-6.49234	1.76439e-45	1.86187e-44	yes	Serinc3	4647.67	11973.7	169.971	380.478	1.16253	1.59281e-23	1.68066e-22	yes	Tram2	950	459	16.7463	8.244	-1.02243	3.03621e-09	2.54576e-08	yes
Cdca4	65	561	4.35967	30.8487	2.82292	1.77907e-45	1.87627e-44	yes	Slc29a1	279.333	1071	23.231	72.1513	1.63497	1.61089e-23	1.69874e-22	yes	Efs	206.333	419.333	8.826	18.7677	1.08842	3.13015e-09	2.62331e-08	yes
Psme2	380.667	1616	60.6263	196.527	1.69671	1.85522e-45	1.95544e-44	yes	Zic2	147	972	8.12733	46.4347	2.51435	1.67659e-23	1.767e-22	yes	Nat14	80.3333	201.667	7.25667	18.1753	1.3246	3.16901e-09	2.65342e-08	yes
Hs3st4	299.333	10.3333	12.7237	0.366333	-5.11821	1.98315e-45	2.08907e-44	yes	Gulp1	149	615	6.94567	23.3343	1.74827	1.80689e-23	1.90323e-22	yes	Adamts14	256.667	106.333	5.63133	2.42067	-1.21807	3.20049e-09	2.67854e-08	yes
Tekt5	390.333	5.33333	31.0307	0.344667	-6.49235	2.19418e-45	2.31002e-44	yes	Zyg11b	3507.33	1481.67	54.2397	19.997	-1.43956	1.82509e-23	1.92128e-22	yes	Begain	60.3333	176.333	2.623	7.717	1.55682	3.21647e-09	2.69068e-08	yes
Eri1	190.667	840.333	5.17667	19.511	1.91419	2.24654e-45	2.36377e-44	yes	Ogdhl	2360.33	825	84.645	25.9893	-1.70351	1.83362e-23	1.92913e-22	yes	Pigz	80.6667	205.667	5.105	18.5723	1.86317	3.30512e-09	2.76356e-08	yes
Cenpf	17.6667	520.667	0.232333	5.43033	4.54677	2.37116e-45	2.49344e-44	yes	mt-Nd2	87096	35152.3	11246.4	3976.08	-1.50005	1.84146e-23	1.93626e-22	yes	Tspan33	24.6667	95.3333	1.41633	5.59833	1.98284	3.3459e-09	2.79637e-08	yes
Ccng1	1011.33	3147.33	38.7707	102.409	1.40131	2.41729e-45	2.54048e-44	yes	Plagl2	119	487	2.93067	10.369	1.82298	1.87549e-23	1.9709e-22	yes	B3galt2	25.3333	103.667	0.311	1.31867	2.08409	3.44022e-09	2.87255e-08	yes
Ptges	99.6667	745	3.70433	23.3283	2.6548	2.46753e-45	2.59177e-44	yes	P2ry2	26.3333	273	1.501	13.4663	3.16536	1.9868e-23	2.08549e-22	yes	Prr5	282.667	115	18.666	7.733	-1.27131	3.4698e-09	2.89592e-08	yes
Kif18b	5.66667	320.333	0.228667	10.9817	5.58571	2.55083e-45	2.67771e-44	yes	Shd	387	89	35.3493	7.232	-2.28922	1.98684e-23	2.08549e-22	yes	Fam161b	38.6667	126.667	1.45633	4.86033	1.73871	3.51562e-09	2.93147e-08	yes
Cenpi	11	295.333	0.594	10.668	4.16668	2.7363e-45	2.87073e-44	yes	Sipa1	232	903.333	9.17967	31.571	1.78209	2.0188e-23	2.11782e-22	yes	Atl1	194.333	452.667	5.38333	12.6303	1.23032	3.52477e-09	2.93774e-08	yes
P4ha1	710.667	2997	30.5647	114.013	1.89926	2.82392e-45	2.96094e-44	yes	Limd2	209.333	837.667	18.016	59.8933	1.73312	2.06815e-23	2.16833e-22	yes	N4bp2l1	128.333	316.667	8.628	21.0647	1.28773	3.55247e-09	2.9554e-08	yes
Ssr4	465	1756	78.7147	253.425	1.68685	2.85651e-45	2.99338e-44	yes	Cthrc1	45.6667	287.667	5.21767	29.074	2.47825	2.09825e-23	2.19861e-22	yes	Cobl	99	259.667	3.14433	6.40467	1.02637	3.58544e-09	2.98145e-08	yes
Adcy2	864.667	203	27.6883	5.50067	-2.3316	3.14148e-45	3.2901e-44	yes	Ahr	80.3333	437.333	1.94233	9.302	2.25975	2.10463e-23	2.20403e-22	yes	Lypd6b	9	59	0.451667	3.03033	2.74615	3.61131e-09	3.00159e-08	yes
Arg2	22	380	2.075	30.134	3.86021	3.19498e-45	3.34419e-44	yes	Mapkapk2	719.333	2323	33.6887	94.9663	1.49515	2.19446e-23	2.29677e-22	yes	Tcerg1l	10.6667	72.3333	0.472333	3.33	2.81764	3.69862e-09	3.06994e-08	yes
Olfml3	478.333	2729	11.8267	57.2903	2.27625	3.50151e-45	3.66292e-44	yes	Ppfibp1	414	1194	15.8433	39.5607	1.32019	2.2294e-23	2.33198e-22	yes	Fuz	94.3333	220.333	7.68267	17.6353	1.19879	3.73343e-09	3.09742e-08	yes
Tmpo	709.667	2411.67	33.3143	87.9853	1.40112	3.61589e-45	3.78038e-44	yes	P4ha1	710.667	1848.33	30.5647	69.7827	1.191	2.32424e-23	2.42979e-22	yes	Tlcd4	110.667	311.333	2.14733	5.74833	1.4206	3.73538e-09	3.09762e-08	yes
Tnfaip8l2	28	429.333	3.38367	43.2917	3.67743	3.9506e-45	4.12793e-44	yes	Apbb1	5915.33	2309	312.673	102.371	-1.61085	2.33741e-23	2.44215e-22	yes	Ppm1k	117.667	262.333	2.51667	5.62233	1.15965	3.84007e-09	3.17862e-08	yes
Scrn1	3719.33	1238.33	121.83	37.0833	-1.71602	4.33383e-45	4.52575e-44	yes	Rinl	45.6667	279.333	2.365	11.331	2.26036	2.40706e-23	2.51347e-22	yes	Pcdhga6	123	287.333	2.969	7.08533	1.25486	3.86011e-09	3.19375e-08	yes
Lgals9	346.333	2577	30.728	194.547	2.66249	4.40414e-45	4.59652e-44	yes	Slc66a3	78.6667	525.333	5.58067	33.919	2.60358	2.54373e-23	2.65465e-22	yes	Prokr1	166.667	52.3333	4.65667	1.53267	-1.60325	3.86812e-09	3.19892e-08	yes
Stra6l	2.33333	637.667	0.0893333	19.9853	7.80553	5.1904e-45	5.414e-44	yes	Tns3	2205.67	5759.33	39.3337	89.456	1.18541	2.62112e-23	2.73384e-22	yes	Tmem150a	236.667	490.333	18.4967	37.6023	1.02356	4.06216e-09	3.35785e-08	yes
Sirpa	2668	9715.33	104.165	314.999	1.59648	5.31502e-45	5.54079e-44	yes	Kirrel1	202.667	1183.33	3.786	19.0547	2.3314	2.63242e-23	2.74405e-22	yes	Ntn1	2530.67	1211.33	51.2053	24.802	-1.04584	4.13086e-09	3.41153e-08	yes
Sp140	32.6667	388	1.96	18.8793	3.26788	5.66419e-45	5.90139e-44	yes	Tnfsfm13	90.3333	460.333	6.61733	29.7293	2.16757	2.73548e-23	2.84984e-22	yes	Cd4	52.6667	220	1.96333	8.281	2.0765	4.30426e-09	3.54827e-08	yes
Sfxn5	3076.67	701	113.887	22.366	-2.34822	5.83285e-45	6.07362e-44	yes	Tox2	573	120.667	31.7037	6.057	-2.38797	2.90115e-23	3.0207e-22	yes	Mro	53.3333	159	3.50733	11.6597	1.73308	4.319e-09	3.55813e-08	yes
Jun	722	2561.33	30.347	91.5003	1.59222	5.9021e-45	6.14219e-44	yes	Tlr6	35	253.333	1.72967	15.532	3.16668	2.99239e-23	3.11391e-22	yes	Kirrel3	114.667	354	3.695	12.272	1.73172	4.35193e-09	3.58106e-08	yes
Tmem165	461.667	1757	32.9233	105.769	1.68373	6.09458e-45	6.33886e-44	yes	Syt16	247.333	41.6667	9.548	1.33433	-2.83908	3.04513e-23	3.16697e-22	yes	Cenpp	103	24.3333	10.2797	2.476	-2.05371	4.63603e-09	3.80965e-08	yes
Dbndd1	339	17.6667	27.2967	1.28367	-4.41038	6.25964e-45	6.50679e-44	yes	Hdac1	383.333	1102	25.292	63.2827	1.32313	3.05256e-23	3.17288e-22	yes	Cyp4x1	4.33333	50	0.143	1.437	3.32897	4.65101e-09	3.8185e-08	yes
Nfatc3	340	1287.67	8.07467	25.6927	1.66988	6.364e-45	6.61146e-44	yes	Vwa5b2	356	54.3333	14.7303	1.90333	-2.95219	3.0707e-23	3.18991e-22	yes	Diras2	90.3333	227.333	2.13833	5.58333	1.38464	4.66278e-09	3.82643e-08	yes
Rasd2	354.667	17.6667	16.96	0.773333	-4.4549	6.45654e-45	6.70376e-44	yes	Pdgfc	102	467	4.30267	17.8417	2.05195	3.0802e-23	3.19794e-22	yes	Plcd3	106.333	269.667	4.75333	11.8143	1.31353	4.68344e-09	3.84165e-08	yes
Clip3	7809	2445.33	580.631	146.566	-1.98607	7.98605e-45	8.28707e-44	yes	Pgd	878.667	2553.67	53.1803	134.644	1.34019	3.13244e-23	3.25031e-22	yes	Stk32c	36	124.667	1.96033	6.697	1.77242	4.73643e-09	3.88336e-08	yes
Otud7a	434.667	53	23.5357	2.957	-2.99264	8.08836e-45	8.38843e-44	yes	Pgm2l1	2055.67	525.667	34.349	8.21433	-2.06405	3.2483e-23	3.3686e-22	yes	Cenpq	207.667	80.6667	12.1663	4.88	-1.31794	4.95335e-09	4.05571e-08	yes
Rogdi	852.667	162	84.67	13.583	-2.64005	8.10804e-45	8.40402e-44	yes	Pdgfra	965	3040.67	20.037	57.091	1.5106	3.2827e-23	3.40233e-22	yes	Rogdi	162	348.667	13.583	30.029	1.14455	5.03563e-09	4.11936e-08	yes
Gpr183	37	418.667	2.70267	17.4903	2.6941	9.06542e-45	9.39097e-44	yes	Rell1	232.333	779.667	9.63167	28.3587	1.55793	3.71035e-23	3.84336e-22	yes	Slc47a1	260.667	747.667	11.566	32.7597	1.50203	5.08592e-09	4.15487e-08	yes
Galk1	113.333	628.333	10.8107	51.2003	2.2437	9.3654e-45	9.69616e-44	yes	Tmem273	9.66667	160.667	0.899	15.616	4.11856	3.84651e-23	3.98213e-22	yes	Trim67	36.3333	143.333	0.486	1.96733	2.01721	5.10586e-09	4.16741e-08	yes
Arhgef5	75.6667	494	2	10.4453	2.38479	9.47972e-45	9.80891e-44	yes	Epha3	74.3333	565.667	1.81667	12.2367	2.75184	3.92966e-23	4.06589e-22	yes	Dnali1	7.66667	77.3333	0.395	4.28067	3.43791	5.2128e-09	4.25278e-08	yes
Sh2b3	236	1050	8.52	29.186	1.77635	9.84135e-45	1.01773e-43	yes	Lrp10	881.667	2853	35.163	109.926	1.6444	3.99103e-23	4.12703e-22	yes	Ints2	469.333	238	9.78667	4.813	-1.02388	5.24364e-09	4.27602e-08	yes
Gsdmd	40.3333	428	3.08833	28.2467	3.19318	1.04015e-44	1.07504e-43	yes	Dbi	3155.33	8298.33	742.717	1712.8	1.20548	4.05989e-23	4.19584e-22	yes	Fgd2	140.667	345	6.49467	16.985	1.38693	5.31678e-09	4.33371e-08	yes
Dnajb11	807	2424.67	56.3983	145.413	1.36644	1.1129e-44	1.14957e-43	yes	Rapgef5	2200.33	919	56.6303	21.1123	-1.42349	4.35582e-23	4.49911e-22	yes	Itga8	234.333	470.333	4.59067	9.46733	1.04425	5.39687e-09	4.39504e-08	yes
Ltbr	226.667	1294.33	14.4683	69.77	2.26971	1.21278e-44	1.25203e-43	yes	Slc27a2	160.667	10.6667	10.94	0.682333	-4.00299	4.37668e-23	4.51808e-22	yes	Lin9	212.333	84.6667	7.676	3.14367	-1.28791	5.44951e-09	4.43393e-08	yes
Amer3	306.667	10	9.35067	0.261667	-5.15927	1.31318e-44	1.35491e-43	yes	Mpp3	304.333	49.6667	14.2713	2.045	-2.80295	4.83327e-23	4.98658e-22	yes	Ctnna3	51.6667	157	1.682	4.996	1.5706	5.61708e-09	4.56209e-08	yes
Tmem154	19.6667	382.667	0.806	13.1047	4.02316	1.39662e-44	1.44017e-43	yes	Relb	91	428	6.15467	23.309	1.92113	4.85629e-23	5.00748e-22	yes	Tfcp2l1	27	113.667	0.338667	1.43367	2.08177	5.86349e-09	4.7537e-08	yes
Magi2	1161	255.667	30.5223	5.40967	-2.49625	1.41077e-44	1.45394e-43	yes	Trib1	137.333	534	4.31533	14.4373	1.74226	4.88808e-23	5.0374e-22	yes	Lyar	306.333	146.333	26.7973	11.898	-1.17137	5.86807e-09	4.75529e-08	yes
Arhgap31	825.333	2763.33	13.9343	39.6563	1.50891	1.43597e-44	1.47907e-43	yes	Plekho2	501.667	1639	20.565	58.3837	1.50537	5.03377e-23	5.18459e-22	yes	Wdr62	262.667	118.667	7.427	3.459	-1.10242	5.92731e-09	4.799e-08	yes
Dgkg	312.333	17	12.9423	0.576667	-4.48822	1.47892e-44	1.52244e-43	yes	Rangap1	3479	1305	159.985	50.849	-1.65365	5.04178e-23	5.18988e-22	yes	Lbp	4140.67	8336	196.272	445.967	1.18408	6.00157e-09	4.85696e-08	yes
Fzd6	194.333	821.333	7.02733	22.7287	1.69346	1.54742e-44	1.59205e-43	yes	Rab20	21	192	2.031	16.142	2.99056	5.07426e-23	5.22035e-22	yes	Fgfbp1	155	358.667	15.309	36.216	1.24225	6.13463e-09	4.95801e-08	yes
Mtpn	2601.33	7446.67	88.5167	216.091	1.28762	1.78752e-44	1.83802e-43	yes	Slc1a5	71.6667	425.333	3.48767	17.9813	2.36617	5.38476e-23	5.53665e-22	yes	Padi1	1	46.3333	0.0313333	1.45	5.53221	6.22973e-09	5.03262e-08	yes
Cdca2	6.33333	295	0.605	10.9347	4.17583	1.79989e-44	1.8497e-43	yes	Cdkl1	226.333	28	25.1187	2.73733	-3.19792	5.67148e-23	5.82815e-22	yes	Ube2e2	334	608.333	32.166	64.493	1.00361	6.23919e-09	5.03802e-08	yes
Napsa	9.66667	353.667	0.855333	25.6703	4.90747	1.99611e-44	2.05017e-43	yes	Rpl10a	2172	6809	364.876	997.596	1.45105	6.10987e-23	6.27509e-22	yes	Ranbp3l	179	464.667	4.81767	12.8533	1.41574	6.25098e-09	5.0453e-08	yes
Diaph3	48	447.667	5.61867	13.3873	1.25257	2.03903e-44	2.09307e-43	yes	Sqor	170.333	633.333	13.2753	41.608	1.64811	6.48433e-23	6.6559e-22	yes	Adamts12	816	1800.33	10.8887	24.5267	1.17152	6.31311e-09	5.09091e-08	yes
Sirt3	726	128.333	75.0253	12.1753	-2.62342	2.20523e-44	2.2624e-43	yes	Tifa	126.333	588.667	8.458	34.6913	2.03619	6.52587e-23	6.69475e-22	yes	Kcnip4	29	176	1.511	9.37467	2.63326	6.46171e-09	5.20611e-08	yes
Rpl32	2142.67	7071	553.55	1558.05	1.49295	2.92769e-44	3.00188e-43	yes	Cyb561	602.333	191.333	34.041	8.89167	-1.93675	6.70664e-23	6.8763e-22	yes	Syt1	139.333	447.333	3.34567	11.1693	1.73918	6.54978e-09	5.27238e-08	yes
Atp6v0d2	11.3333	1996	0.621	88.8383	7.16045	3.06268e-44	3.13851e-43	yes	Trafd1	353.333	1298.33	21.58	70.1503	1.70076	6.83914e-23	7.00818e-22	yes	Exoc3l	82	15.3333	3.79433	0.761667	-2.31661	6.60554e-09	5.31256e-08	yes
Errfi1	747.667	2296	33.0263	86.252	1.38494	3.24877e-44	3.32732e-43	yes	Trip6	62	327.333	4.21533	17.6143	2.06303	6.87603e-23	7.04062e-22	yes	Galnt15	163.333	364.333	3.22233	7.353	1.19023	6.62523e-09	5.32366e-08	yes
Ehd4	488	2158.67	17.5947	66.3573	1.91512	3.30275e-44	3.38069e-43	yes	Dok6	955.333	314.333	12.8213	3.65367	-1.81113	6.87857e-23	7.04062e-22	yes	Bex2	144.667	351.667	18.2067	45.8723	1.33316	6.68455e-09	5.36658e-08	yes
Rgs19	143	659.667	15.338	55.6547	1.85939	3.35588e-44	3.43314e-43	yes	Rgs7bp	2623.33	613	50.0023	10.268	-2.28384	6.97263e-23	7.13287e-22	yes	Btc	133	37.6667	5.32	1.589	-1.74331	6.73625e-09	5.4033e-08	yes
Tpt1	11940	38745	1369.21	3773.72	1.46264	3.50285e-44	3.58146e-43	yes	Arnt	258.667	921.333	9.573	28.418	1.56976	7.14697e-23	7.30709e-22	yes	Gad1	143.667	338.333	5.31667	12.201	1.19841	6.94937e-09	5.56686e-08	yes
Fndc3a	771.667	2471.67	17.7567	48.8973	1.4614	3.65549e-44	3.73542e-43	yes	Ndn	4064.33	1468.67	147.382	46.672	-1.65893	7.38842e-23	7.54969e-22	yes	Lamp5	90.6667	278.333	5.223	16.6733	1.67459	7.0227e-09	5.6213e-08	yes
Ercc6l	7	285	0.176	6.15267	5.12756	3.85472e-44	3.93677e-43	yes	Atpaf1	1218	419.667	85.0513	25.1743	-1.75638	7.85961e-23	8.02663e-22	yes	Gria4	273	545	6.71633	13.7093	1.02941	7.03599e-09	5.6288e-08	yes
Adra2a	687	106.667	25.116	3.27267	-2.94007	4.2657e-44	4.35405e-43	yes	Pik3cd	255	1045	7.13633	26.137	1.87284	7.94981e-23	8.11418e-22	yes	Nr2f1	204	404.333	9.40967	19.2493	1.03259	7.04627e-09	5.63453e-08	yes
Ccdc85c	1489.33	248.667	46.7577	6.967	-2.74659	4.45263e-44	4.54228e-43	yes	Mndal	10	179	1.005	14.606	3.86129	8.27439e-23	8.44071e-22	yes	Slc29a4	36.3333	131.667	1.48133	6.33633	2.09675	7.15664e-09	5.71271e-08	yes
Rwdd2a	443	42.3333	50.3273	4.281	-3.55532	4.55656e-44	4.64569e-43	yes	Nr4a1	128.667	517.667	6.917	24.525	1.82603	8.98515e-23	9.1606e-22	yes	Gpc6	361.333	843	12.3993	28.7873	1.21517	7.37788e-09	5.87897e-08	yes
Skap2	558	2000.67	31.4773	107.771	1.77558	4.89353e-44	4.98644e-43	yes	Slc10a4	351.667	79	25.9963	5.474	-2.24764	9.14696e-23	9.32033e-22	yes	Rhov	213.667	89.3333	14.2927	6.16467	-1.21318	7.39143e-09	5.88718e-08	yes
Fam131b	2054	642	67.451	17.9837	-1.90715	5.05694e-44	5.15005e-43	yes	Prkce	1594.67	459	34.3967	8.663	-1.98933	9.3414e-23	9.5131e-22	yes	Tmem80	105.333	235.333	7.866	17.0697	1.11773	7.39759e-09	5.8895e-08	yes
Ano6	479	2820.33	14.0323	68.1083	2.27908	5.51605e-44	5.61445e-43	yes	Wdr47	1496.33	460.667	47.6893	12.888	-1.88764	9.70374e-23	9.87655e-22	yes	Smarcd3	186.667	382.333	12.336	26.0793	1.08003	7.53616e-09	5.99455e-08	yes
Usp31	2986.33	917.333	39.443	10.3327	-1.93256	6.15208e-44	6.2583e-43	yes	Nyap2	303	39.6667	7.04633	0.901667	-2.96621	9.83925e-23	1.00089e-21	yes	Dok3	276.333	114.333	19.9863	8.48467	-1.23608	7.82479e-09	6.21324e-08	yes
Fcho1	728.667	140.333	35.404	6.419	-2.46349	6.38941e-44	6.49608e-43	yes	Sat1	1119.67	3876.67	127.79	390.414	1.61123	1.00315e-22	1.01987e-21	yes	Uck2	1062.33	603.667	61.518	25.1297	-1.29162	8.03456e-09	6.36587e-08	yes
Tmem35a	1205.67	191.333	84.1703	11.294	-2.89776	7.34592e-44	7.46436e-43	yes	Ehd4	488	1459.33	17.5947	45.8163	1.38072	1.00519e-22	1.02137e-21	yes	Has1	60	8.33333	3.25067	0.466667	-2.80027	8.18897e-09	6.48255e-08	yes
Cux2	475.333	75.6667	11.17	2.171	-2.3632	7.92848e-44	8.0518e-43	yes	Ddr2	189.333	1099.33	3.09167	15.6717	2.3417	1.06082e-22	1.07729e-21	yes	Pcdhga2	44.6667	143.333	1.09967	3.569	1.69845	8.36701e-09	6.61483e-08	yes
Heatr5a	556.667	1863.67	12.215	28.308	1.21256	8.37274e-44	8.49819e-43	yes	Ttll5	1311.67	416	45.186	12.178	-1.8916	1.06522e-22	1.08116e-21	yes	Mcph1	287	127	7.52233	3.20967	-1.22876	8.41929e-09	6.65326e-08	yes
Kifc1	24	315	1.363	15.422	3.50013	8.42569e-44	8.54714e-43	yes	Tfpi2	8.66667	159.333	0.843	12.202	3.85544	1.06922e-22	1.0846e-21	yes	Syt12	174.333	355.333	5.57067	11.632	1.06218	8.52079e-09	6.72354e-08	yes
Nme2	967.333	4097	146.261	508.831	1.79864	9.28239e-44	9.41091e-43	yes	Cryl1	123.667	502.333	11.142	39.2257	1.81579	1.07675e-22	1.09163e-21	yes	Pola2	354.333	173.667	18.8563	8.83733	-1.09337	8.52306e-09	6.72354e-08	yes
Grin2d	453.667	60.6667	11.224	1.27767	-3.135	9.70893e-44	9.83784e-43	yes	Ebf3	1059.33	173.667	32.7093	4.68267	-2.8043	1.13503e-22	1.15007e-21	yes	Gimap9	123.667	39	10.8377	3.35333	-1.69239	8.54664e-09	6.73921e-08	yes
Tmx4	3941	1128	96.638	23.4943	-2.04028	1.19043e-43	1.20556e-42	yes	Treml2	15.6667	253	0.652667	9.28833	3.831	1.17435e-22	1.18925e-21	yes	Dach1	134	43	3.00033	0.993	-1.59526	8.75809e-09	6.89396e-08	yes
Fbn2	59.3333	422.667	0.723	4.377	2.59787	1.26028e-43	1.27558e-42	yes	Cdkl5	670	219.333	11.1807	3.06833	-1.86548	1.19276e-22	1.20722e-21	yes	Kcnab3	36.3333	125.333	1.64333	5.82067	1.82456	8.8424e-09	6.95428e-08	yes
Cdca7l	9.66667	309	0.663333	15.8947	4.58266	1.30111e-43	1.31617e-42	yes	Rest	160.333	586.667	3.09667	9.87367	1.67287	1.21829e-22	1.23237e-21	yes	Trank1	21	106.667	0.225333	1.191	2.40204	9.00346e-09	7.07482e-08	yes
Pitpnm1	1957	451	64.931	13.0943	-2.30996	1.34995e-43	1.36482e-42	yes	Septin9	1025.67	3063.33	44.6227	118.823	1.41297	1.2216e-22	1.23503e-21	yes	Wnt10a	8.66667	57.6667	0.403667	2.74	2.76294	9.10569e-09	7.15204e-08	yes
Unc5d	290.667	10	4.82567	0.137	-5.13848	1.52818e-43	1.54415e-42	yes	Ids	6392.33	2865	178.127	69.1117	-1.36591	1.23684e-22	1.24974e-21	yes	Gsdme	112	277.667	3.93767	9.088	1.20662	9.17661e-09	7.20151e-08	yes
Ugt1a6a	15.3333	421.333	0.906	20.9607	4.53203	1.55108e-43	1.56641e-42	yes	Zic4	55.3333	334	3.66033	17.4663	2.25453	1.24094e-22	1.25319e-21	yes	Pcp4	55.6667	223.333	9.95	41.399	2.05683	9.23755e-09	7.24307e-08	yes
Phyhipl	4384.67	1247.67	285.293	66.037	-2.1111	1.60254e-43	1.61748e-42	yes	Txndc5	1308	4235.67	62.948	177.625	1.4966	1.27342e-22	1.28527e-21	yes	Abcg4	104	268.667	3.403	8.927	1.39137	9.24263e-09	7.24392e-08	yes
Tnc	191	8550	3.65567	137.423	5.23235	1.61882e-43	1.63299e-42	yes	Slc29a4	582.667	131.667	28.0413	6.33633	-2.14583	1.28296e-22	1.29371e-21	yes	Dscc1	67.6667	12	5.752	0.984333	-2.54684	9.39323e-09	7.35242e-08	yes
Ehd3	2040	603.667	74.8947	18.8417	-1.99094	1.64253e-43	1.65599e-42	yes	Mgst3	1282	442.333	156.27	47.3497	-1.72261	1.28321e-22	1.29371e-21	yes	Nmnat2	333.333	647	8.20167	16.587	1.01606	9.83028e-09	7.67134e-08	yes
Camta2	2915.67	897.333	86.1167	22.995	-1.90497	1.65294e-43	1.66556e-42	yes	Fn3k	398.667	90.6667	48.2593	9.266	-2.38079	1.39393e-22	1.40455e-21	yes	Cenpt	279.667	124.667	17.7897	8.521	-1.06194	1.0068e-08	7.84332e-08	yes
Slc15a2	592.333	63.3333	26.2487	2.215	-3.56687	1.76632e-43	1.77881e-42	yes	Myc	56.3333	281.333	3.931	15.6757	1.99556	1.49014e-22	1.50066e-21	yes	Gpr182	82.3333	203.333	2.381	6.025	1.33939	1.00905e-08	7.85754e-08	yes
Naip5	19	315.667	0.480667	6.93567	3.85093	1.8165e-43	1.82833e-42	yes	Epm2aip1	3285	1388.33	62.0057	23.1943	-1.41863	1.50432e-22	1.5141e-21	yes	Fam131a	150	324.333	9.61967	21.8507	1.18362	1.01686e-08	7.91496e-08	yes
Coro6	285.333	11.6667	20.9987	0.635667	-5.04588	1.95334e-43	1.96496e-42	yes	Lacc1	79.3333	399	4.388	19.2023	2.12965	1.55517e-22	1.56441e-21	yes	G0s2	37	120	4.836	16.1473	1.73941	1.0378e-08	8.07096e-08	yes
Lamb1	304.333	2960.67	7.10367	58.8127	3.04949	1.98781e-43	1.99853e-42	yes	Nuak2	30.3333	233.667	1.35567	8.81633	2.70118	1.68747e-22	1.69655e-21	yes	Flvcr2	63.6667	168.667	2.132	5.74133	1.42918	1.05152e-08	8.16717e-08	yes
Phospho1	623	57.3333	85.8063	8.11333	-3.40272	2.06085e-43	2.07081e-42	yes	Gpc6	150.333	843	6.09967	28.7873	2.23863	1.74648e-22	1.75491e-21	yes	Wdr86	26.3333	98	1.27167	4.84	1.92829	1.06448e-08	8.26077e-08	yes
Slc39a1	845.667	3950.33	47.9327	190.498	1.9907	2.22222e-43	2.23172e-42	yes	Rpl10	2594.33	6566.67	503.303	1112.17	1.14388	1.75303e-22	1.76051e-21	yes	Nefm	571.667	4281.67	20.0843	151.814	2.91816	1.10805e-08	8.57736e-08	yes
Bcl6b	31.6667	403.667	1.26467	13.5903	3.42575	2.26842e-43	2.27686e-42	yes	Psme1	403.333	1646	50.1257	174.571	1.80019	1.76539e-22	1.77194e-21	yes	Stard10	165	357.333	14.7127	31.4057	1.09397	1.10811e-08	8.57736e-08	yes
Sp110	21.6667	325.333	1.538	19.394	3.65648	2.36697e-43	2.37445e-42	yes	Slc14a1	508.667	1308.67	20.9503	44.3697	1.0826	1.85215e-22	1.85794e-21	yes	Ccdc92b	18	78.3333	0.510333	2.301	2.17275	1.11824e-08	8.64463e-08	yes
Drd2	267.667	9	14.1503	0.401	-5.14109	2.61387e-43	2.62068e-42	yes	Lama3	57.3333	341.667	1.08867	5.409	2.3128	1.85312e-22	1.85794e-21	yes	C1rb	8.66667	56.6667	0.411	2.726	2.72958	1.11923e-08	8.64867e-08	yes
5730409E04Rik	1614.67	408.333	75.5513	16.318	-2.21099	2.73818e-43	2.7438e-42	yes	Crybg1	38.6667	319.667	0.791	5.81967	2.87919	1.88204e-22	1.88589e-21	yes	Nyap1	72.3333	203.667	2.95267	8.27167	1.48616	1.1292e-08	8.71822e-08	yes
Rhoj	117	990.667	6.54467	48.2133	2.88104	2.80957e-43	2.81377e-42	yes	Rps28	559	1702.67	193.867	518.57	1.41947	1.91846e-22	1.92132e-21	yes	Pnma8c	60.6667	170.333	1.36067	3.95367	1.53888	1.13514e-08	8.75666e-08	yes
Ppp1r3b	53.6667	623.333	1.65433	16.2897	3.29964	3.35212e-43	3.35528e-42	yes	Glra2	152	11.6667	6.54067	0.434	-3.91367	1.94451e-22	1.94634e-21	yes	Mpv17l	183.333	387.333	8.39633	18.6887	1.15433	1.15514e-08	8.90718e-08	yes
B3galt1	580	100	25.0053	3.43567	-2.86357	3.49851e-43	3.49987e-42	yes	Cd151	891.333	3254.67	69.7987	223.742	1.68056	1.97416e-22	1.97493e-21	yes	Arhgef39	70.3333	13	4.82867	1.06867	-2.17581	1.22172e-08	9.3846e-08	yes
Mpp3	304.333	18	14.2713	0.725	-4.299	3.52173e-43	3.52115e-42	yes	Pacc1	138.667	520	8.27367	27.0723	1.71022	2.02058e-22	2.02024e-21	yes	Serpinb2	44.3333	2	2.54767	0.122667	-4.37636	1.25689e-08	9.64256e-08	yes
Hebp1	323.333	1555.67	40.8087	167.346	2.03588	3.55737e-43	3.55482e-42	yes	Pnma2	442.333	81.3333	12.4477	1.914	-2.70121	2.02607e-22	2.02462e-21	yes	Card14	25.6667	112.667	0.745	3.294	2.14453	1.28768e-08	9.86621e-08	yes
Ciao2a	347.667	1441.67	37.7013	132.366	1.81185	3.95186e-43	3.94684e-42	yes	Fbxo44	1415.67	461.667	131.654	36.8483	-1.83708	2.06316e-22	2.06054e-21	yes	Faah	154.667	354.667	4.58333	10.8797	1.24717	1.3084e-08	1.00208e-07	yes
Glp1r	312	25	7.22433	0.612333	-3.56048	4.07361e-43	4.06619e-42	yes	Enho	1695.67	488.333	177.927	45.1107	-1.97974	2.11198e-22	2.10814e-21	yes	Npl	1830.67	755	119.157	50.5173	-1.23802	1.31733e-08	1.00849e-07	yes
Rpl12	2666	11587.3	295.244	1114.75	1.91674	4.38315e-43	4.37276e-42	yes	Ube2l6	253	1107.33	22.1273	82.998	1.90725	2.1475e-22	2.14242e-21	yes	Col4a4	21	86.6667	0.239333	1.00867	2.07536	1.33889e-08	1.02413e-07	yes
Rims4	396.667	15	10.7033	0.343	-4.96371	4.44754e-43	4.43455e-42	yes	Ncstn	851.667	2398	39.4417	96.4537	1.29012	2.19964e-22	2.19322e-21	yes	Myoc	0.666667	56	0.0356667	3.126	6.4536	1.34541e-08	1.02869e-07	yes
Hnrnpa1	2497.33	6907.67	192.108	456.778	1.24957	4.66133e-43	4.64515e-42	yes	Nrg3	303.667	48	12.7127	1.58267	-3.00584	2.2205e-22	2.2128e-21	yes	Riox2	386	183	20.729	10.064	-1.04245	1.35288e-08	1.03396e-07	yes
Ezr	619.667	2469	26.5243	89.1627	1.74912	4.67824e-43	4.65943e-42	yes	Dgkg	312.333	42.6667	12.9423	1.55067	-3.06114	2.24794e-22	2.23892e-21	yes	Dgat2	187	400	9.45233	20.9967	1.15142	1.38718e-08	1.05862e-07	yes
Dpysl3	2161	8038	60.5253	183.522	1.60034	4.72706e-43	4.70546e-42	yes	Tmem266	202.333	28	11.2387	1.323	-3.08659	2.29241e-22	2.28196e-21	yes	Nup37	221	96	20.5217	8.875	-1.20933	1.38749e-08	1.05862e-07	yes
C1qtnf4	322.333	15	33.4733	1.30133	-4.68495	4.77938e-43	4.75493e-42	yes	Inpp5j	919.667	246.667	37.0987	8.924	-2.0556	2.38012e-22	2.36796e-21	yes	Galnt13	43.6667	152.667	1.42067	3.40067	1.25925	1.39739e-08	1.06573e-07	yes
H3f3b	2753.33	8344.33	185.43	476.957	1.36299	4.99662e-43	4.96833e-42	yes	Inpp4a	1654.67	635.333	45.5423	15.269	-1.5766	2.41119e-22	2.39756e-21	yes	Mcemp1	114.333	33.6667	8.678	2.65133	-1.71064	1.41217e-08	1.0761e-07	yes
Nup205	419.667	1585.67	8.767	28.3467	1.69302	5.06648e-43	5.03502e-42	yes	Atl1	1654	452.667	55.3793	12.6303	-2.13245	2.50823e-22	2.49268e-21	yes	Ceacam1	282	105.667	11.574	4.636	-1.31994	1.41863e-08	1.08057e-07	yes
Apobec3	50	415.333	3.51267	24.3227	2.79166	5.29163e-43	5.25589e-42	yes	Arrdc4	111.333	492.333	5.05367	15.5277	1.61944	2.52447e-22	2.50745e-21	yes	Atp7b	11.6667	65	0.203667	1.27267	2.64357	1.43843e-08	1.09519e-07	yes
Inhba	157.333	1004.67	3.387	18.0583	2.41458	6.95674e-43	6.90596e-42	yes	Rps18-ps6	1967.33	5489.67	468.392	1145.39	1.29004	2.57358e-22	2.55483e-21	yes	Fgf14	31.6667	108	1.03867	3.577	1.78402	1.48985e-08	1.13244e-07	yes
Clec7a	5	306.667	0.959333	49.4097	5.68662	7.00573e-43	6.95077e-42	yes	Adgrb1	1849.33	687.667	63.2883	20.7573	-1.60832	2.5924e-22	2.5721e-21	yes	Osm	202.667	79.3333	10.1377	4.09633	-1.30732	1.51047e-08	1.14763e-07	yes
Neurl1a	762	163	31.7277	6.223	-2.35006	7.3587e-43	7.29698e-42	yes	Stk38	313.333	898.667	14.1223	33.8593	1.26158	2.68513e-22	2.66264e-21	yes	Kcnq1	86.6667	19	5.345	1.39567	-1.93724	1.5288e-08	1.16058e-07	yes
Nuak2	30.3333	340	1.35567	12.448	3.19884	9.28841e-43	9.20545e-42	yes	Rgs19	143	520.667	15.338	46.478	1.59944	2.75523e-22	2.73067e-21	yes	Cmya5	11	72.3333	0.105667	0.714	2.7564	1.5475e-08	1.17379e-07	yes
Ccl11	19.3333	376.333	2.35833	39.8597	4.07909	1.00384e-42	9.94325e-42	yes	B4galnt4	408.667	103.333	15.4333	3.40867	-2.17877	2.98726e-22	2.959e-21	yes	Arhgef37	133.667	279.667	2.98267	6.385	1.09808	1.54874e-08	1.17424e-07	yes
Nyap2	303	11.3333	7.04633	0.217667	-5.01668	1.1701e-42	1.15838e-41	yes	Wnt5a	286	958.667	7.79567	22.1867	1.50895	3.02002e-22	2.98982e-21	yes	Muc15	2.66667	40	0.128333	1.68767	3.71706	1.59765e-08	1.20981e-07	yes
S100a6	656.667	5314.33	124.752	873.539	2.80781	1.2065e-42	1.19376e-41	yes	Grin3a	925.667	295.333	16.851	4.65233	-1.85681	3.04316e-22	3.01108e-21	yes	Gng3	200.333	508.333	13.9083	36.5623	1.39441	1.68263e-08	1.27204e-07	yes
Pdlim7	247	1433	32.556	112.41	1.78778	1.22202e-42	1.20846e-41	yes	Slfn9	21	189	0.547333	3.944	2.84917	3.07017e-22	3.03615e-21	yes	Psrc1	182.667	73.6667	12.68	5.49733	-1.20575	1.68854e-08	1.27544e-07	yes
Rnd2	4791.33	1064	458.232	87.221	-2.39333	1.35514e-42	1.33937e-41	yes	Trim9	2091.33	747.333	71.1263	22.3373	-1.67093	3.07407e-22	3.03835e-21	yes	Scrt2	9.66667	64.6667	0.330667	2.251	2.76712	1.69756e-08	1.28172e-07	yes
Tspyl2	1490	441	76.6327	20.5743	-1.89711	1.40199e-42	1.38492e-41	yes	Crip1	100.333	733.667	30.3887	193.196	2.66846	3.14538e-22	3.10714e-21	yes	Gabra5	7	55.6667	0.307333	2.587	3.0734	1.70858e-08	1.28897e-07	yes
Smc4	144.333	1001.67	4.652	28.4877	2.61441	1.4789e-42	1.46009e-41	yes	Amigo1	1574.67	414.333	44.1557	10.5397	-2.06677	3.22467e-22	3.18373e-21	yes	Mgat4c	21.6667	94	1.06467	4.13467	1.95737	1.72483e-08	1.30015e-07	yes
Tmem145	282.667	6.66667	16.4757	0.297667	-5.7905	1.65094e-42	1.62905e-41	yes	Nsg2	3812.33	1297	229.269	68.241	-1.74833	3.30533e-22	3.26159e-21	yes	Slc5a6	263.667	576	11.856	27.781	1.22848	1.74094e-08	1.3112e-07	yes
Parvb	514	1916	18.4543	58.0117	1.65238	1.67581e-42	1.65269e-41	yes	P3h1	138.667	738	6.141	27.5923	2.16772	3.43333e-22	3.38604e-21	yes	Ppp1r26	52.3333	140.333	1.095	3.01367	1.46059	1.92937e-08	1.4483e-07	yes
Cd300ld3	13.6667	368	2.17133	49.6443	4.51498	1.72887e-42	1.70409e-41	yes	Dynll2	11151	4146	601.978	196.682	-1.61385	3.45773e-22	3.40825e-21	yes	Epha3	256.667	565.667	5.95567	12.2367	1.03888	1.97312e-08	1.4787e-07	yes
Ddost	1296.67	4404.67	82.2623	236.851	1.52568	1.7302e-42	1.70447e-41	yes	Apobec3	50	301.667	3.51267	18.1183	2.36681	3.53803e-22	3.48551e-21	yes	Gprc5a	62.3333	9.66667	3.382	0.545333	-2.63267	1.99927e-08	1.49768e-07	yes
Capza1	1766.33	5224.33	80.0323	190.623	1.25207	1.94882e-42	1.91879e-41	yes	Resf1	109	454	3.304	10.0727	1.60816	3.56224e-22	3.50745e-21	yes	P2rx5	14.6667	75.6667	0.904333	3.709	2.0361	2.05046e-08	1.53413e-07	yes
Plbd1	49	750.667	3.341	42.5213	3.66983	1.99611e-42	1.96429e-41	yes	Il16	81.3333	422	2.87767	13.7713	2.2587	3.78044e-22	3.71825e-21	yes	Epb41l4a	39	117.667	1.24533	3.86833	1.63518	2.05156e-08	1.53432e-07	yes
Frmpd1	460.667	39	13.5247	1.214	-3.47775	2.0864e-42	2.05203e-41	yes	Clec2l	613	142	57.217	11.7277	-2.28653	3.89483e-22	3.82869e-21	yes	Nudcd1	403.667	192.667	12.3907	5.95333	-1.05748	2.08167e-08	1.55555e-07	yes
Grm3	390.667	18.3333	17.2387	0.694	-4.63457	2.12047e-42	2.0844e-41	yes	Crispld1	47	288.667	2.008	9.86667	2.2968	3.95564e-22	3.88635e-21	yes	Cyp46a1	84	205.667	4.50367	11.4943	1.35175	2.09909e-08	1.56727e-07	yes
L1cam	1937	364	53.2323	9.051	-2.55615	2.56424e-42	2.51925e-41	yes	Klhdc8a	720.667	205	22.603	5.64	-2.00275	4.07835e-22	4.00474e-21	yes	Csmd3	37.3333	120	0.351333	1.206	1.77932	2.1823e-08	1.62606e-07	yes
Acsl5	473	1759.67	15.5863	48.0017	1.6228	2.60869e-42	2.56153e-41	yes	Kdelr2	493.667	1519.33	36.333	97.183	1.41942	4.16845e-22	4.091e-21	yes	Cystm1	265.333	521.333	36.1997	73.4713	1.02121	2.19225e-08	1.6328e-07	yes
Zfp207	1214	3187.33	76.9353	167.92	1.12606	2.68801e-42	2.63798e-41	yes	Necap2	484.667	1435.33	34.2673	87.9677	1.36014	4.18499e-22	4.105e-21	yes	Pls1	131.333	312.667	4.015	9.93767	1.30751	2.19952e-08	1.63754e-07	yes
Ramp1	978.667	173.667	59.5413	9.06267	-2.71588	2.93499e-42	2.8788e-41	yes	Sdc4	881.333	2430.67	47.962	115.861	1.27243	4.4095e-22	4.32289e-21	yes	Npas2	46.6667	158.667	1.25167	4.77833	1.93266	2.20945e-08	1.64291e-07	yes
Mta2	583	2072.33	25.009	75.5537	1.59505	3.14516e-42	3.08264e-41	yes	Them6	968.667	234.667	72.6383	15.5427	-2.2245	4.43789e-22	4.34756e-21	yes	Jchain	8.66667	85.3333	0.704	7.00767	3.31529	2.2771e-08	1.69183e-07	yes
G3bp1	994	2747.67	19.9623	46.9677	1.23439	3.14621e-42	3.08264e-41	yes	Frmd6	288.667	954	8.34267	23.923	1.51982	4.43947e-22	4.34756e-21	yes	Nqo2	680	384.667	40.6393	20.0447	-1.01966	2.27855e-08	1.69221e-07	yes
Coq8a	452.333	47	25.0133	2.69133	-3.2163	3.53567e-42	3.46235e-41	yes	Slc3a2	1953	4764	146.142	319.484	1.12838	4.71507e-22	4.61496e-21	yes	Kng2	230.333	683.333	16.915	51.2007	1.59786	2.41248e-08	1.78509e-07	yes
Ccnyl1	256.667	1012.67	15.9913	58.7767	1.87795	3.61134e-42	3.53454e-41	yes	Tmem145	282.667	45.3333	16.4757	2.30633	-2.83666	4.82089e-22	4.71599e-21	yes	Erbb4	110	279.333	1.079	2.80267	1.37711	2.45953e-08	1.81843e-07	yes
Nefl	30530.7	776.333	1206.3	26.7697	-5.49385	3.72269e-42	3.64155e-41	yes	Psmc5	3678.67	1438.67	373.786	128.048	-1.54553	5.09653e-22	4.98294e-21	yes	Nme4	160.667	53.3333	18.681	6.302	-1.56769	2.54097e-08	1.87635e-07	yes
Erlin1	182.667	751	8.697	27.2703	1.64874	3.85492e-42	3.76886e-41	yes	Fat3	684.667	224	7.046	2.47633	-1.5086	5.27505e-22	5.1547e-21	yes	Myh7b	10.6667	67.3333	0.201333	1.29133	2.6812	2.57303e-08	1.89847e-07	yes
Scrt2	287.667	9.66667	11.364	0.330667	-5.10295	3.91997e-42	3.83039e-41	yes	Mov10	62.6667	442.667	2.45	14.872	2.60175	5.50729e-22	5.37874e-21	yes	Abcc8	2.66667	41	0.0833333	1.264	3.92296	2.57891e-08	1.90126e-07	yes
[truncated: 5,418 more rows]
