# Supplementary material for: Sequential Modulation of the cGAS-STING Pathway Promotes Spinal Cord Injury Repair
Source: Research Square preprint supplement (doi:10.21203/rs.3.rs-8596952/v1), 2026-01-22
Supplement: Supplementary file 5 [file db5bcd08e495764ad34abde1.docx]

**Supplementary figure legends**


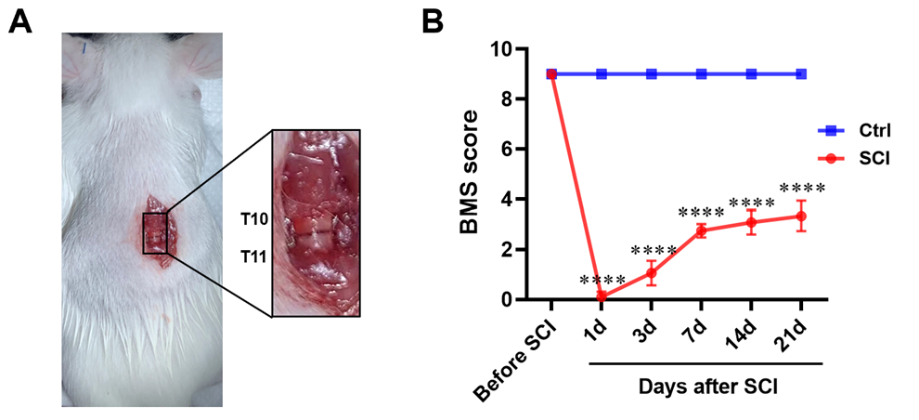


**Figure S1**. Establishment of the mouse spinal cord injury (SCI) model.

(**A**) Schematic diagram illustrating the surgical procedure for producing contusive SCI in mice

(**B**) Basso Mouse Scale (BMS) locomotor scores following SCI. Data are presented as mean ± SEM (n=6). One-way ANOVA; ****p < 0.0001 versus the uninjured control (Ctrl) group


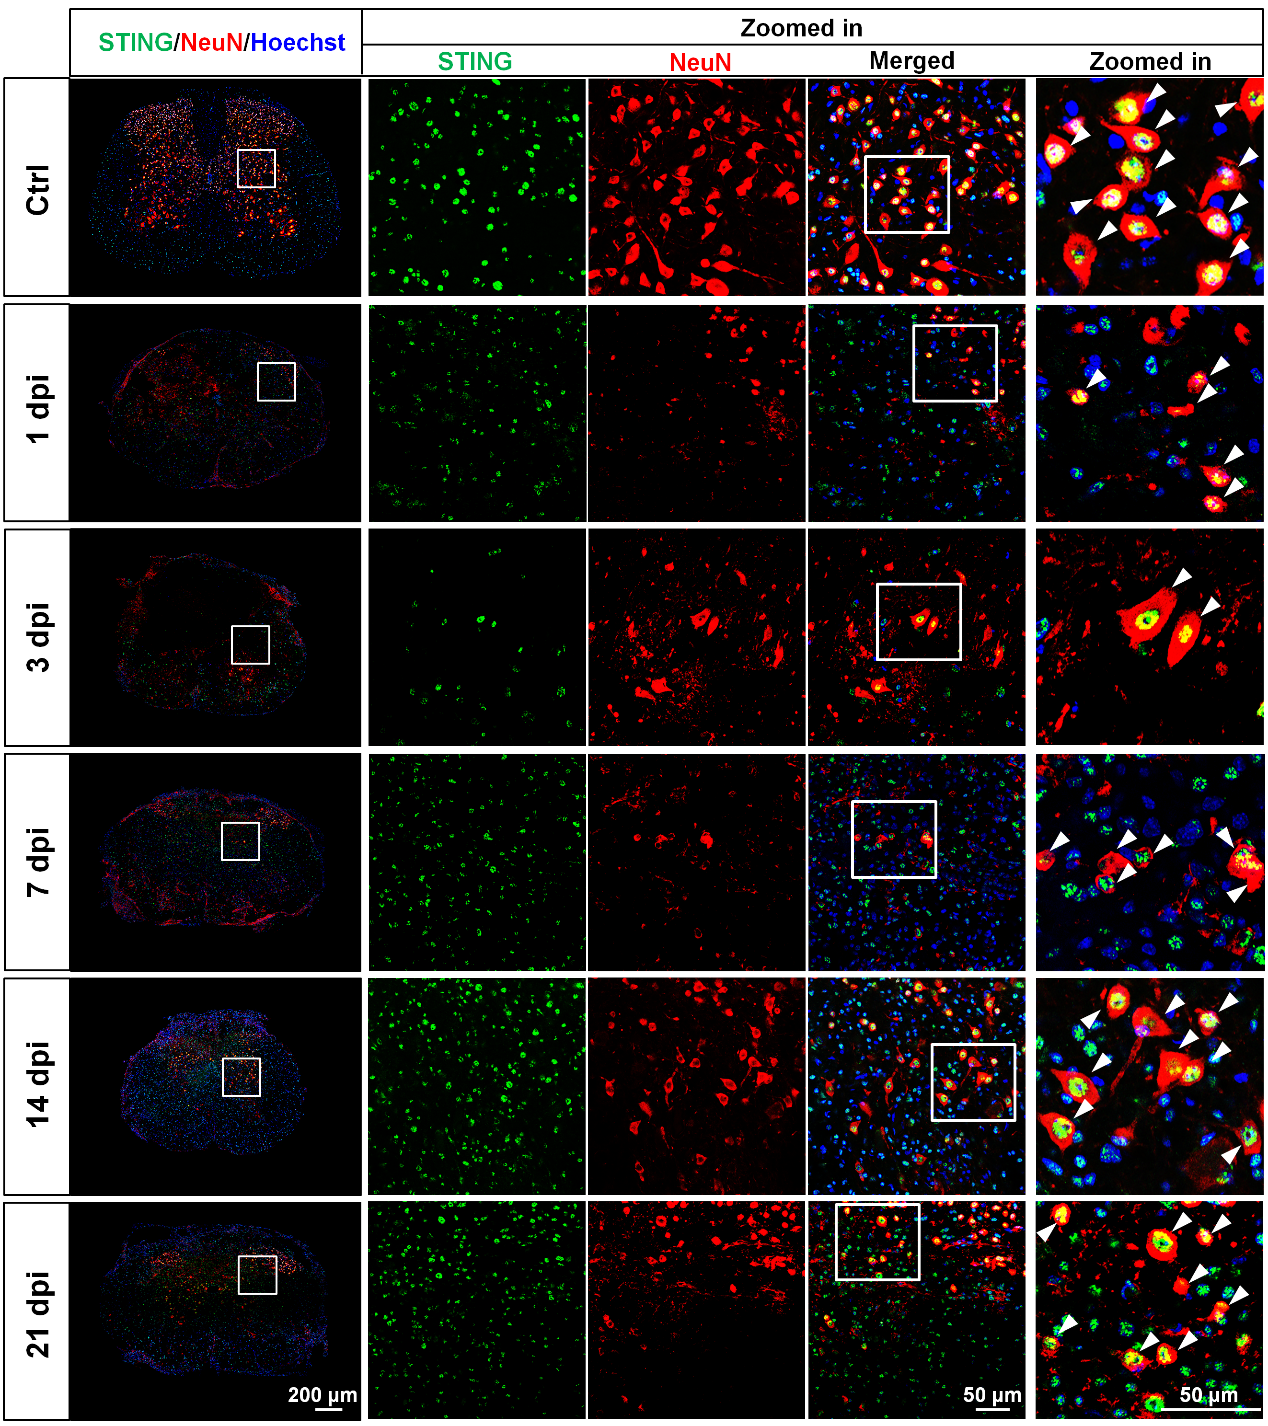


**Figure S2**. Cellular localization of STING in neurons of the intact and injured spinal cord.

Representative double immunofluorescence staining for STING (green) and the neuronal marker NeuN (red), with Hoechst (blue) labeling nuclei. *Left column*: overview images (scale bar=200 μm). *Middle three columns*: magnified views of the boxed regions in the left column (scale bar=50 μm). *Right column* (“Zoomed in”): further magnification of the boxed areas in the third column (scale bar=50 μm). White arrowheads indicate representative cells exhibiting co-localization of STING and NeuN.


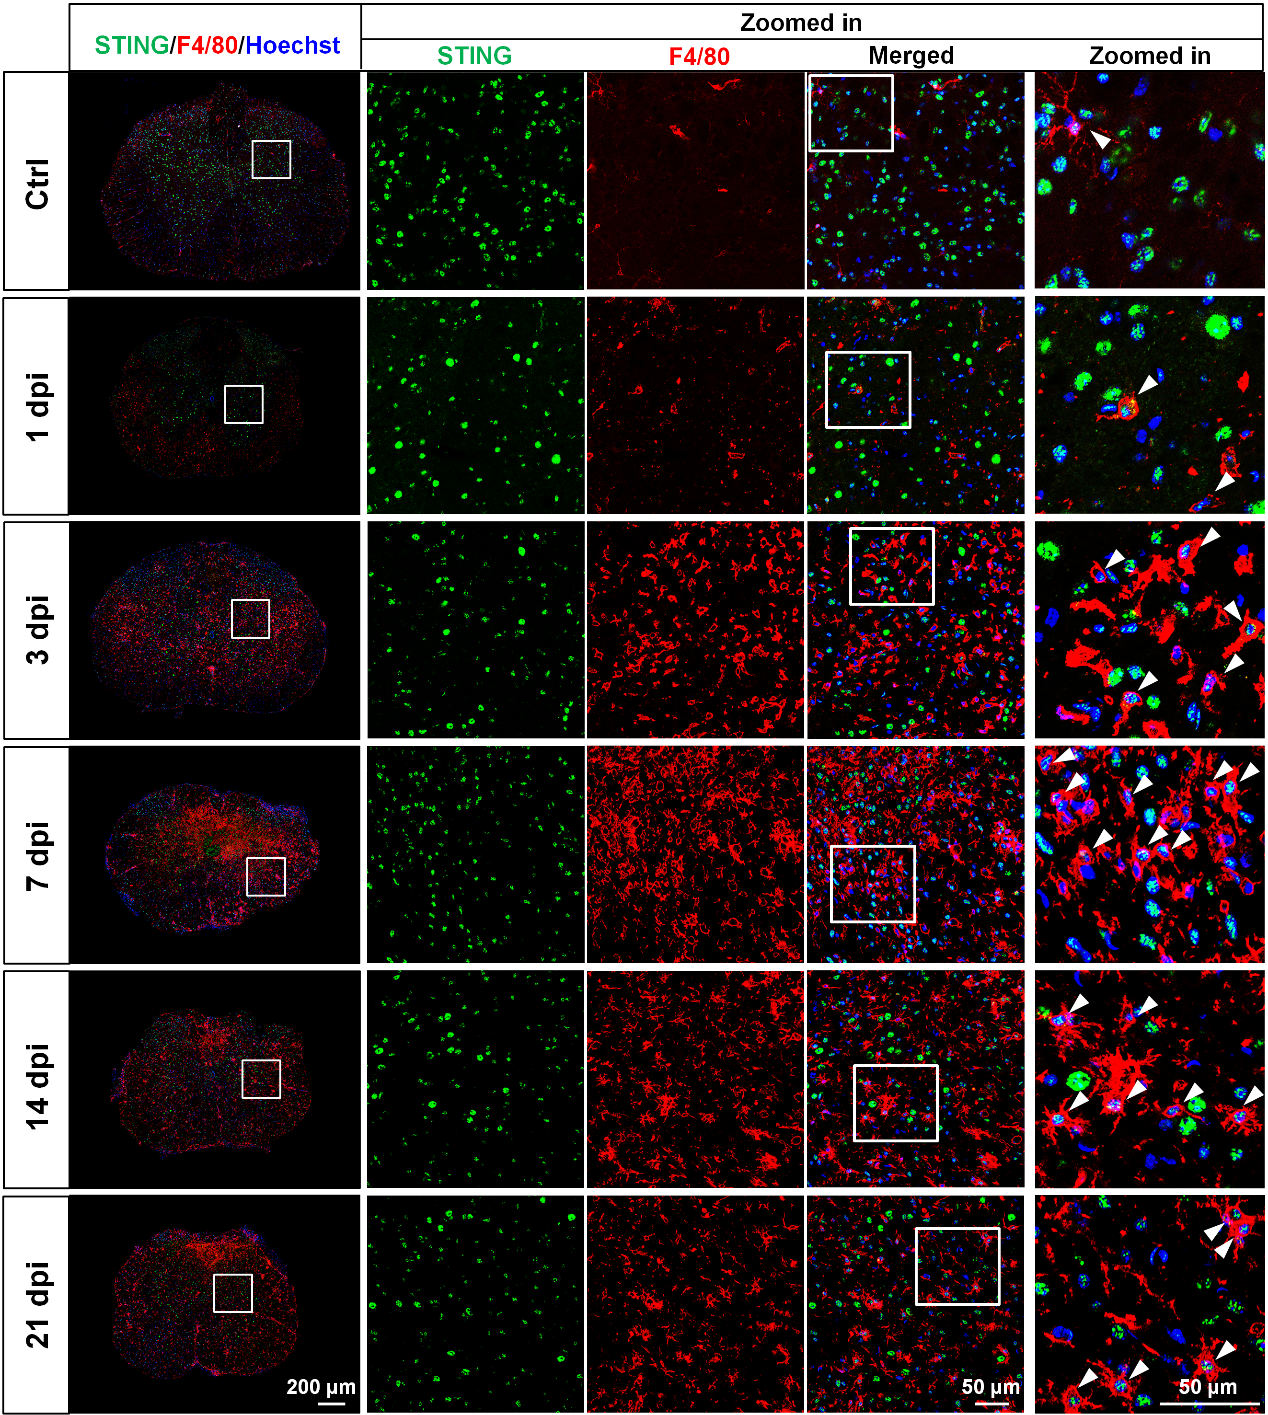


**Figure S3**. Cellular localization of STING in microglia of the intact and injured spinal cord.

Representative double immunofluorescence staining for STING (green) and the active microglia marker F4/80 (red), with Hoechst (blue) labeling nuclei. *Left column*: overview images (scale bar=200 μm). *Middle three columns*: magnified views of the boxed regions in the left column (scale bar=50 μm). *Right column* (“Zoomed in”): further magnification of the boxed areas in the third column (scale bar=50 μm). White arrowheads indicate representative cells exhibiting co-localization of STING and F4/80.


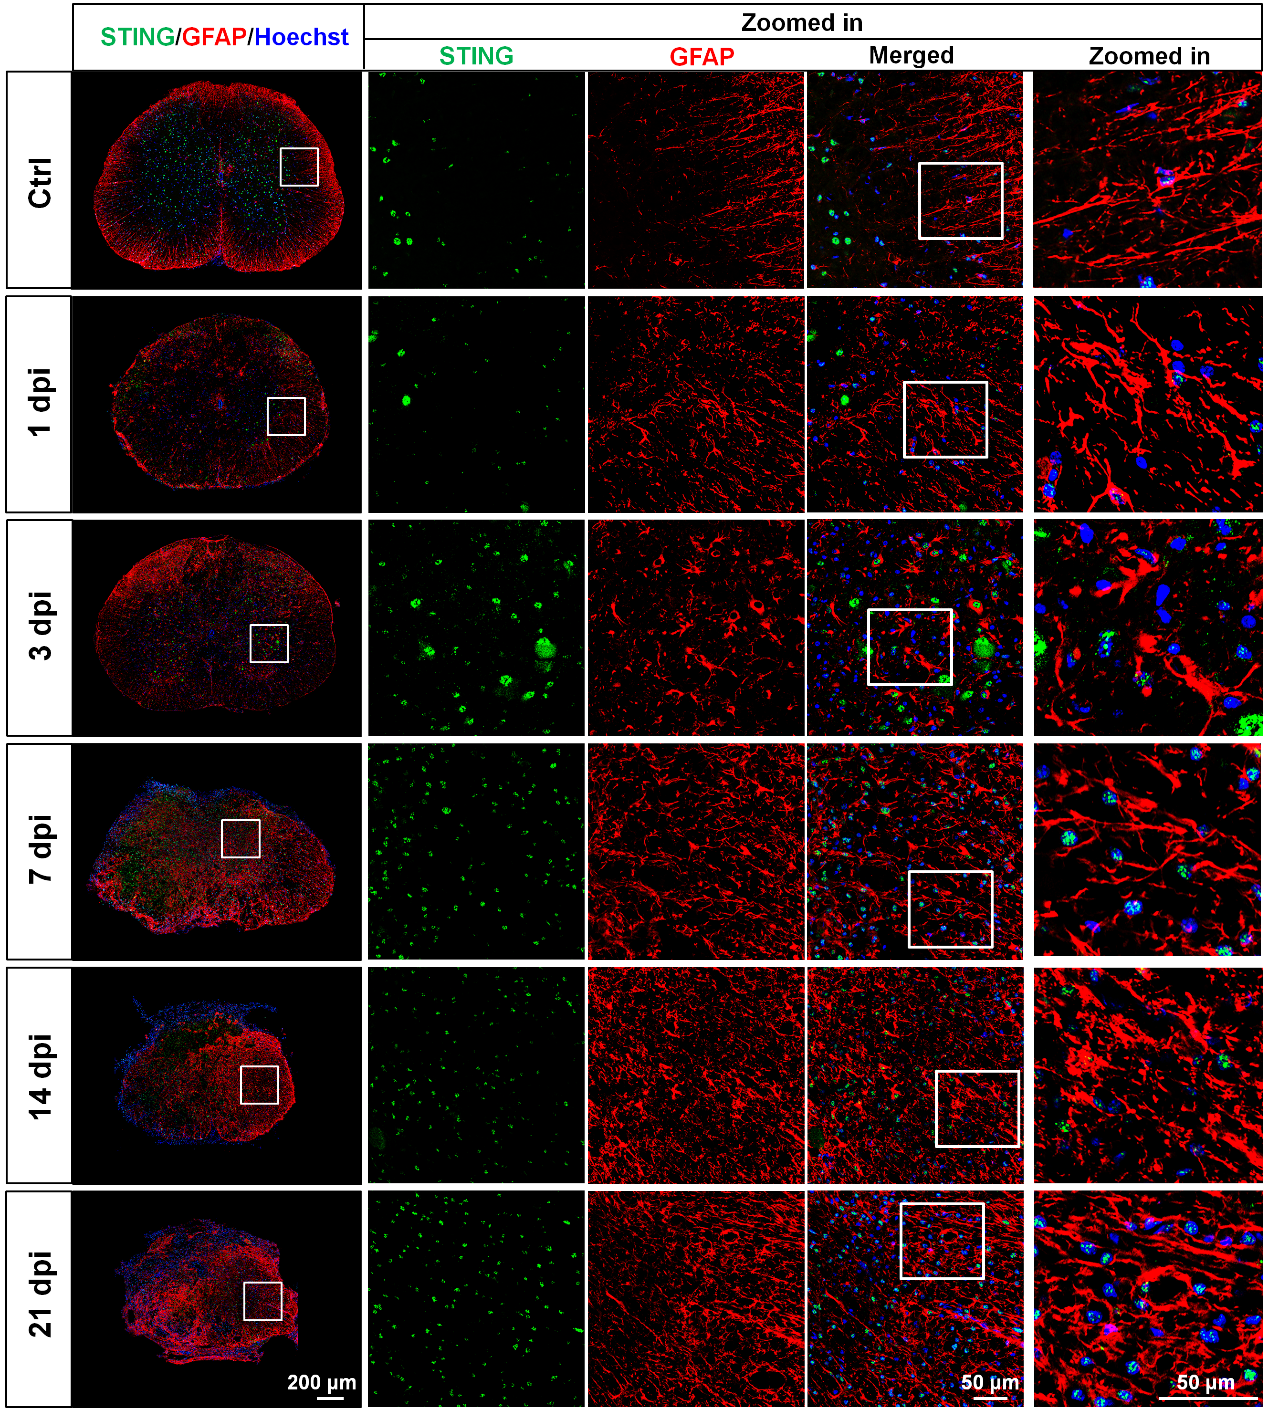


**Figure S4**. Cellular localization of STING in astrocyte of the intact and injured spinal cord.

Representative double immunofluorescence staining for STING (green) and the astrocyte marker GFAP (red), with Hoechst (blue) labeling nuclei. *Left column*: overview images (scale bar=200 μm). *Middle three columns*: magnified views of the boxed regions in the left column (scale bar=50 μm). *Right column* (“Zoomed in”): further magnification of the boxed areas in the third column (scale bar=50 μm).


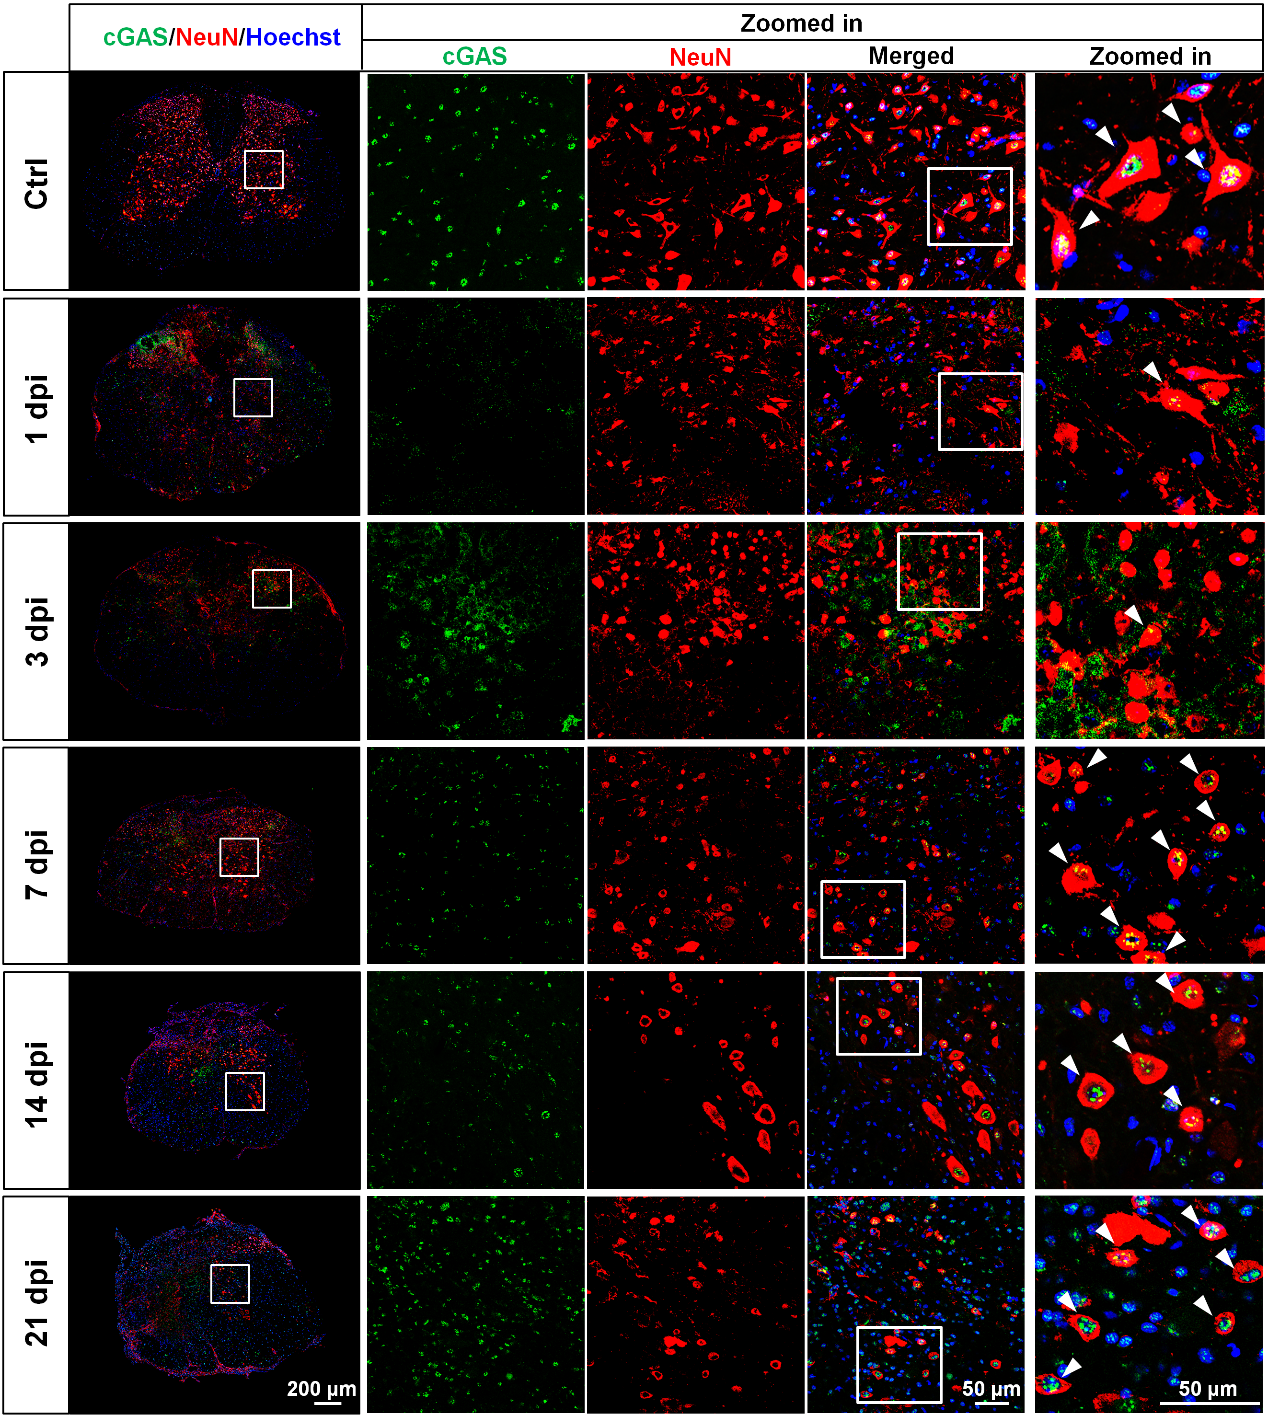


**Figure S5**. Cellular localization of cGAS in neurons of the intact and injured spinal cord.

Representative double immunofluorescence staining for cGAS (green) and the neuronal marker NeuN (red), with Hoechst (blue) labeling nuclei. *Left column*: overview images (scale bar=200 μm). *Middle three columns*: magnified views of the boxed regions in the left column (scale bar=50 μm). *Right column* (“Zoomed in”): further magnification of the boxed areas in the third column (scale bar=50 μm). White arrowheads indicate representative cells exhibiting co-localization of cGAS and NeuN.


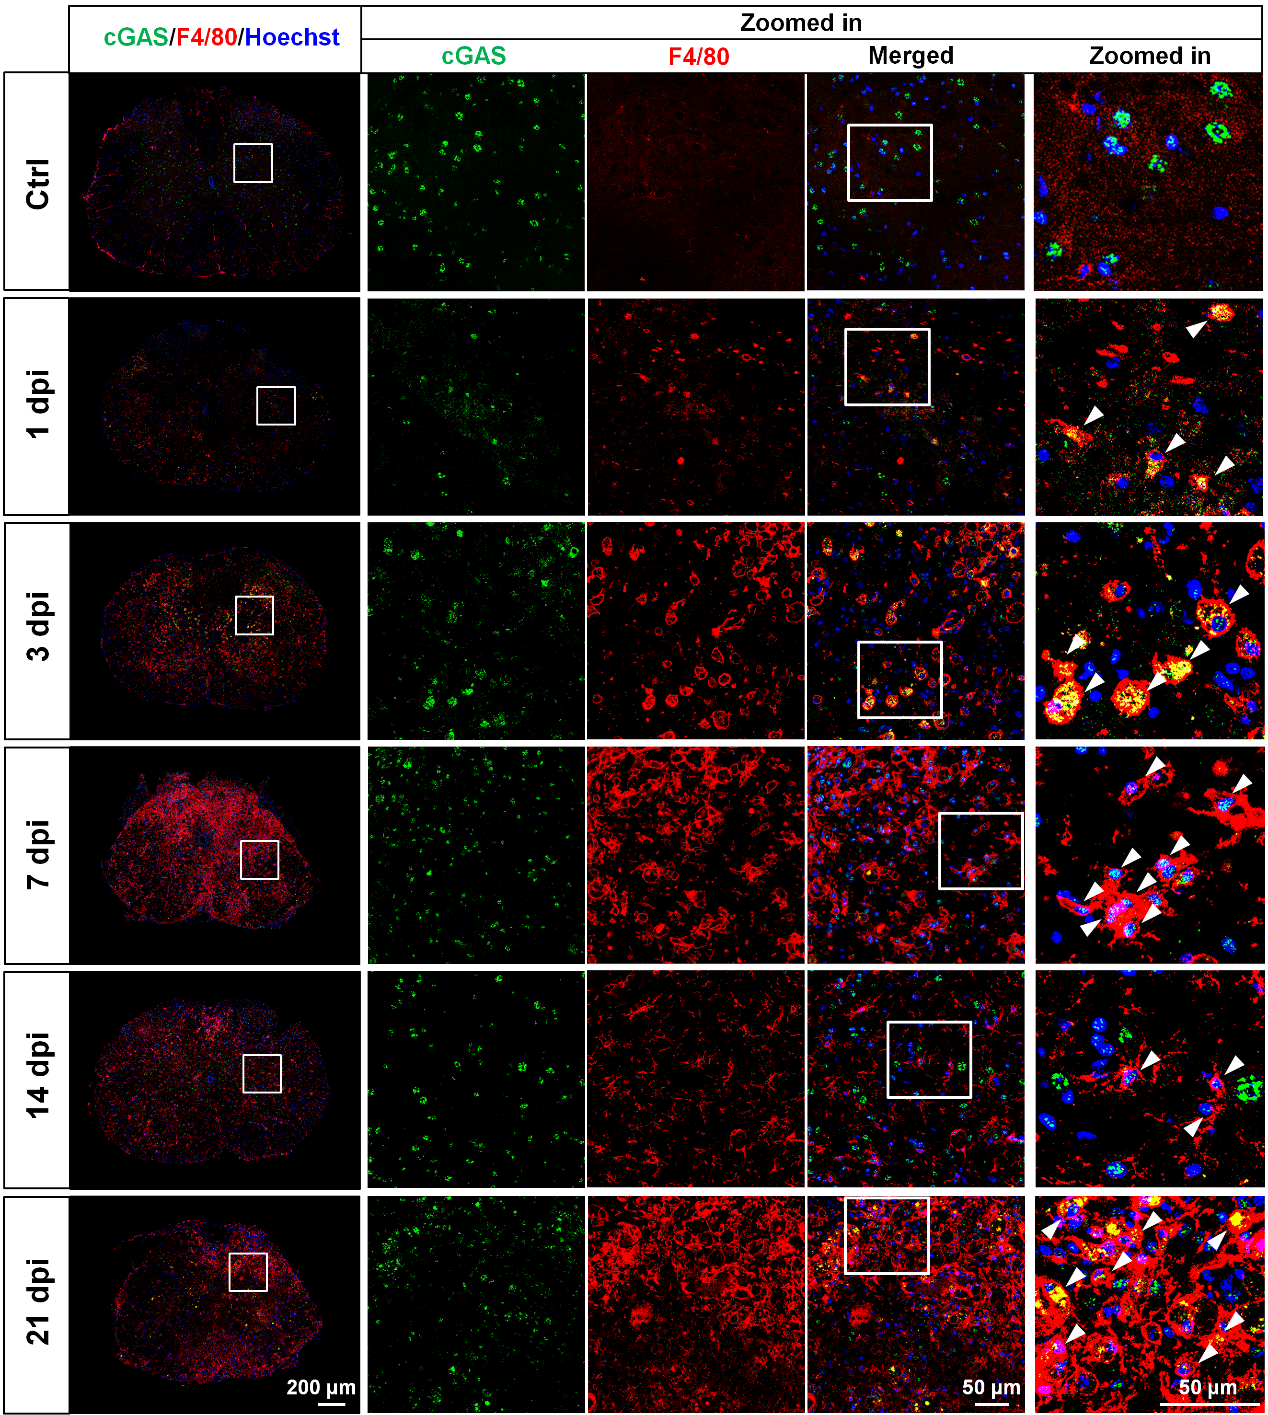


**Figure S6**. Cellular localization of cGAS in microglia of the intact and injured spinal cord.

Representative double immunofluorescence staining for cGAS (green) and the active microglia marker F4/80 (red), with Hoechst (blue) labeling nuclei. *Left column*: overview images (scale bar=200 μm). *Middle three columns*: magnified views of the boxed regions in the left column (scale bar=50 μm). *Right column* (“Zoomed in”): further magnification of the boxed areas in the third column (scale bar=50 μm). White arrowheads indicate representative cells exhibiting co-localization of cGAS and F4/80.


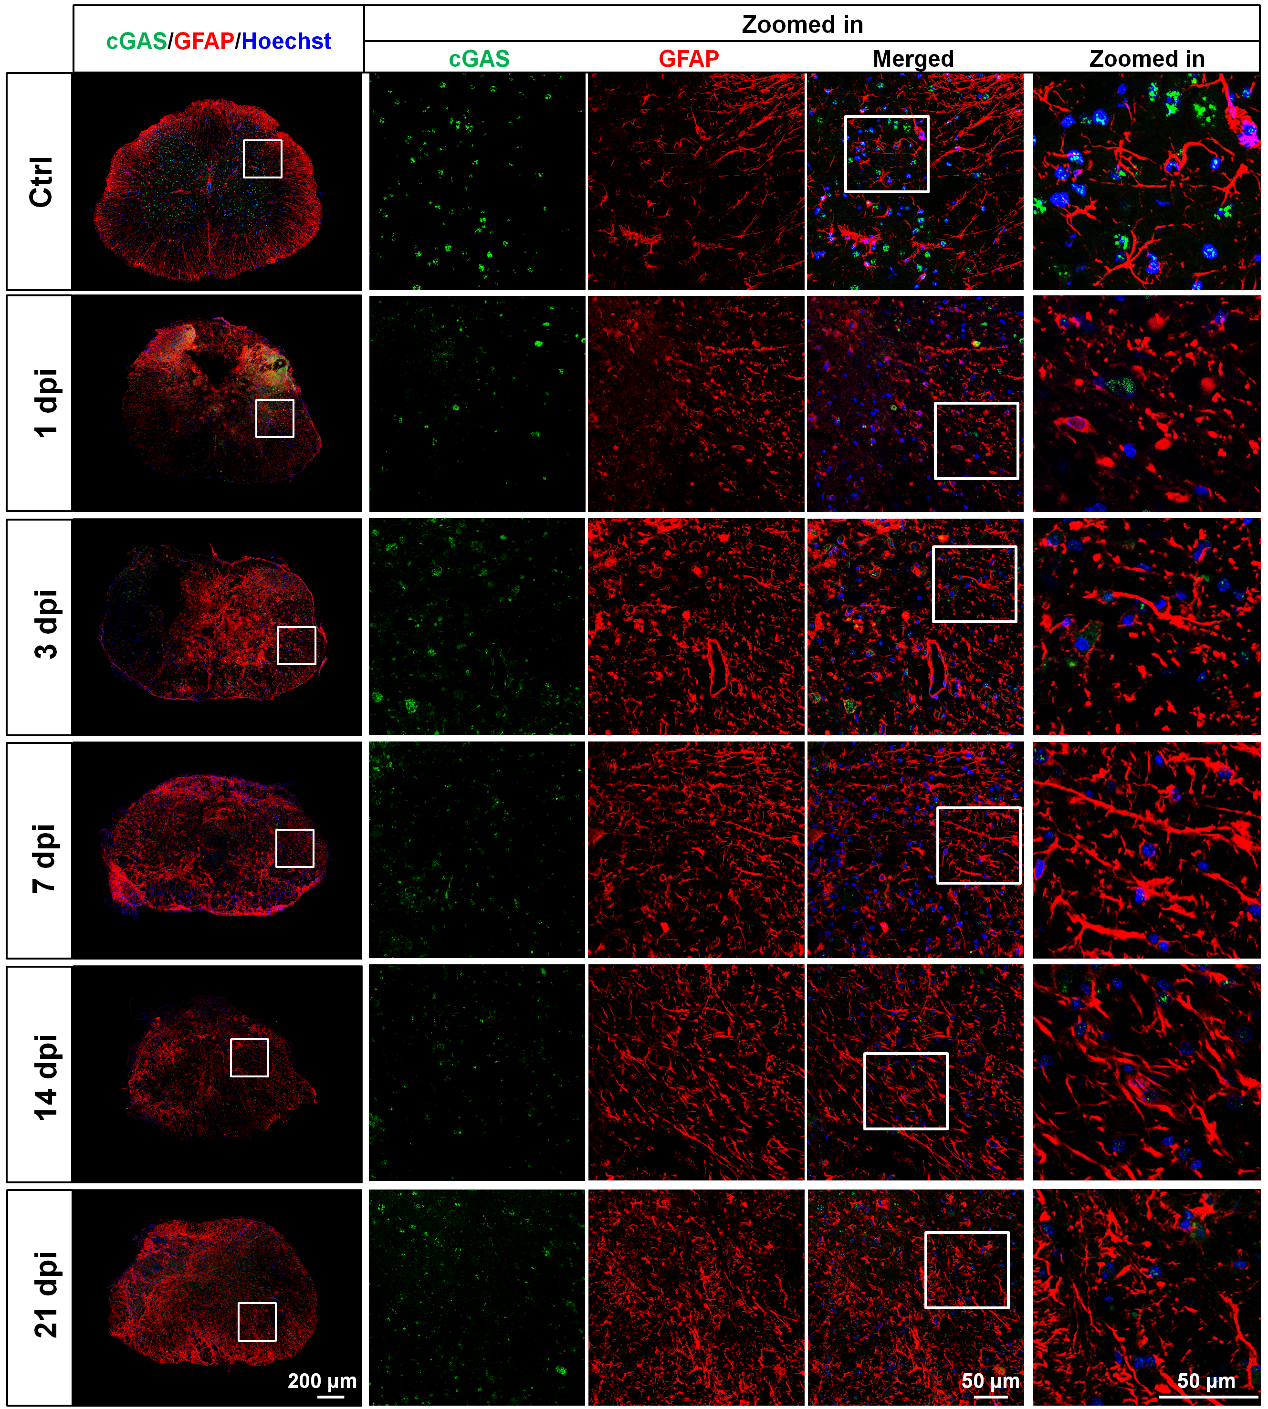


**Figure S7**. Cellular localization of cGAS in astrocyte of the intact and injured spinal cord.

Representative double immunofluorescence staining for cGAS (green) and the astrocyte marker GFAP (red), with Hoechst (blue) labeling nuclei. *Left column*: overview images (scale bar=200 μm). *Middle three columns*: magnified views of the boxed regions in the left column (scale bar=50 μm). *Right column* (“Zoomed in”): further magnification of the boxed areas in the third column (scale bar=50 μm).


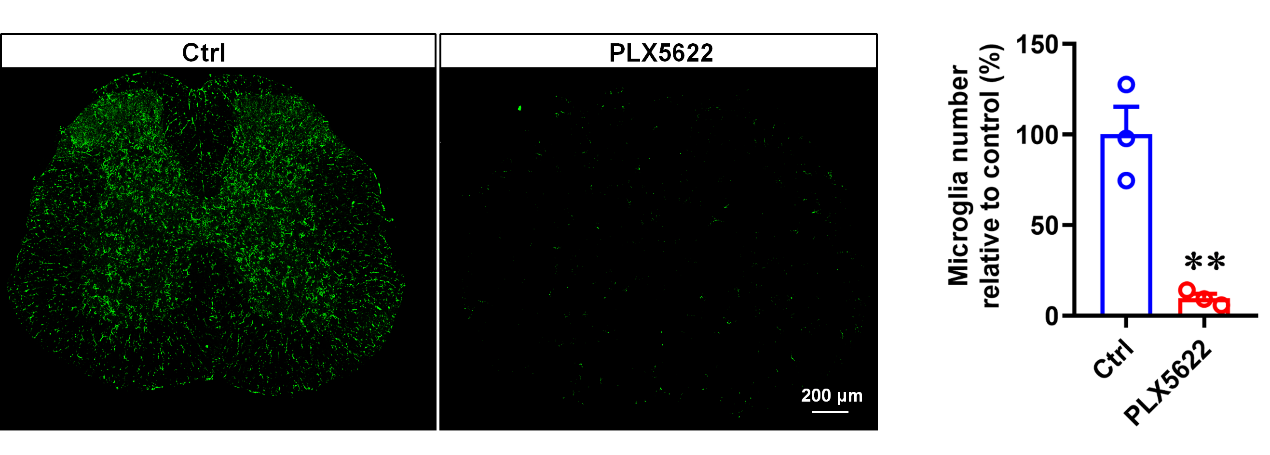


**Figure S8**. Microglial depletion efficacy following 3-day PLX5622 administration in intact mice

Representative Iba1 immunofluorescence images from mice treated with PLX5622 or vehicle (control) for 3 consecutive days. Scale bar=200 μm. The bar graph shows the quantification of Iba1 fluorescence intensity. Data are presented as mean ± SEM (n=3). Student’s t-test; **p < 0.01 versus the control (Ctrl) group.


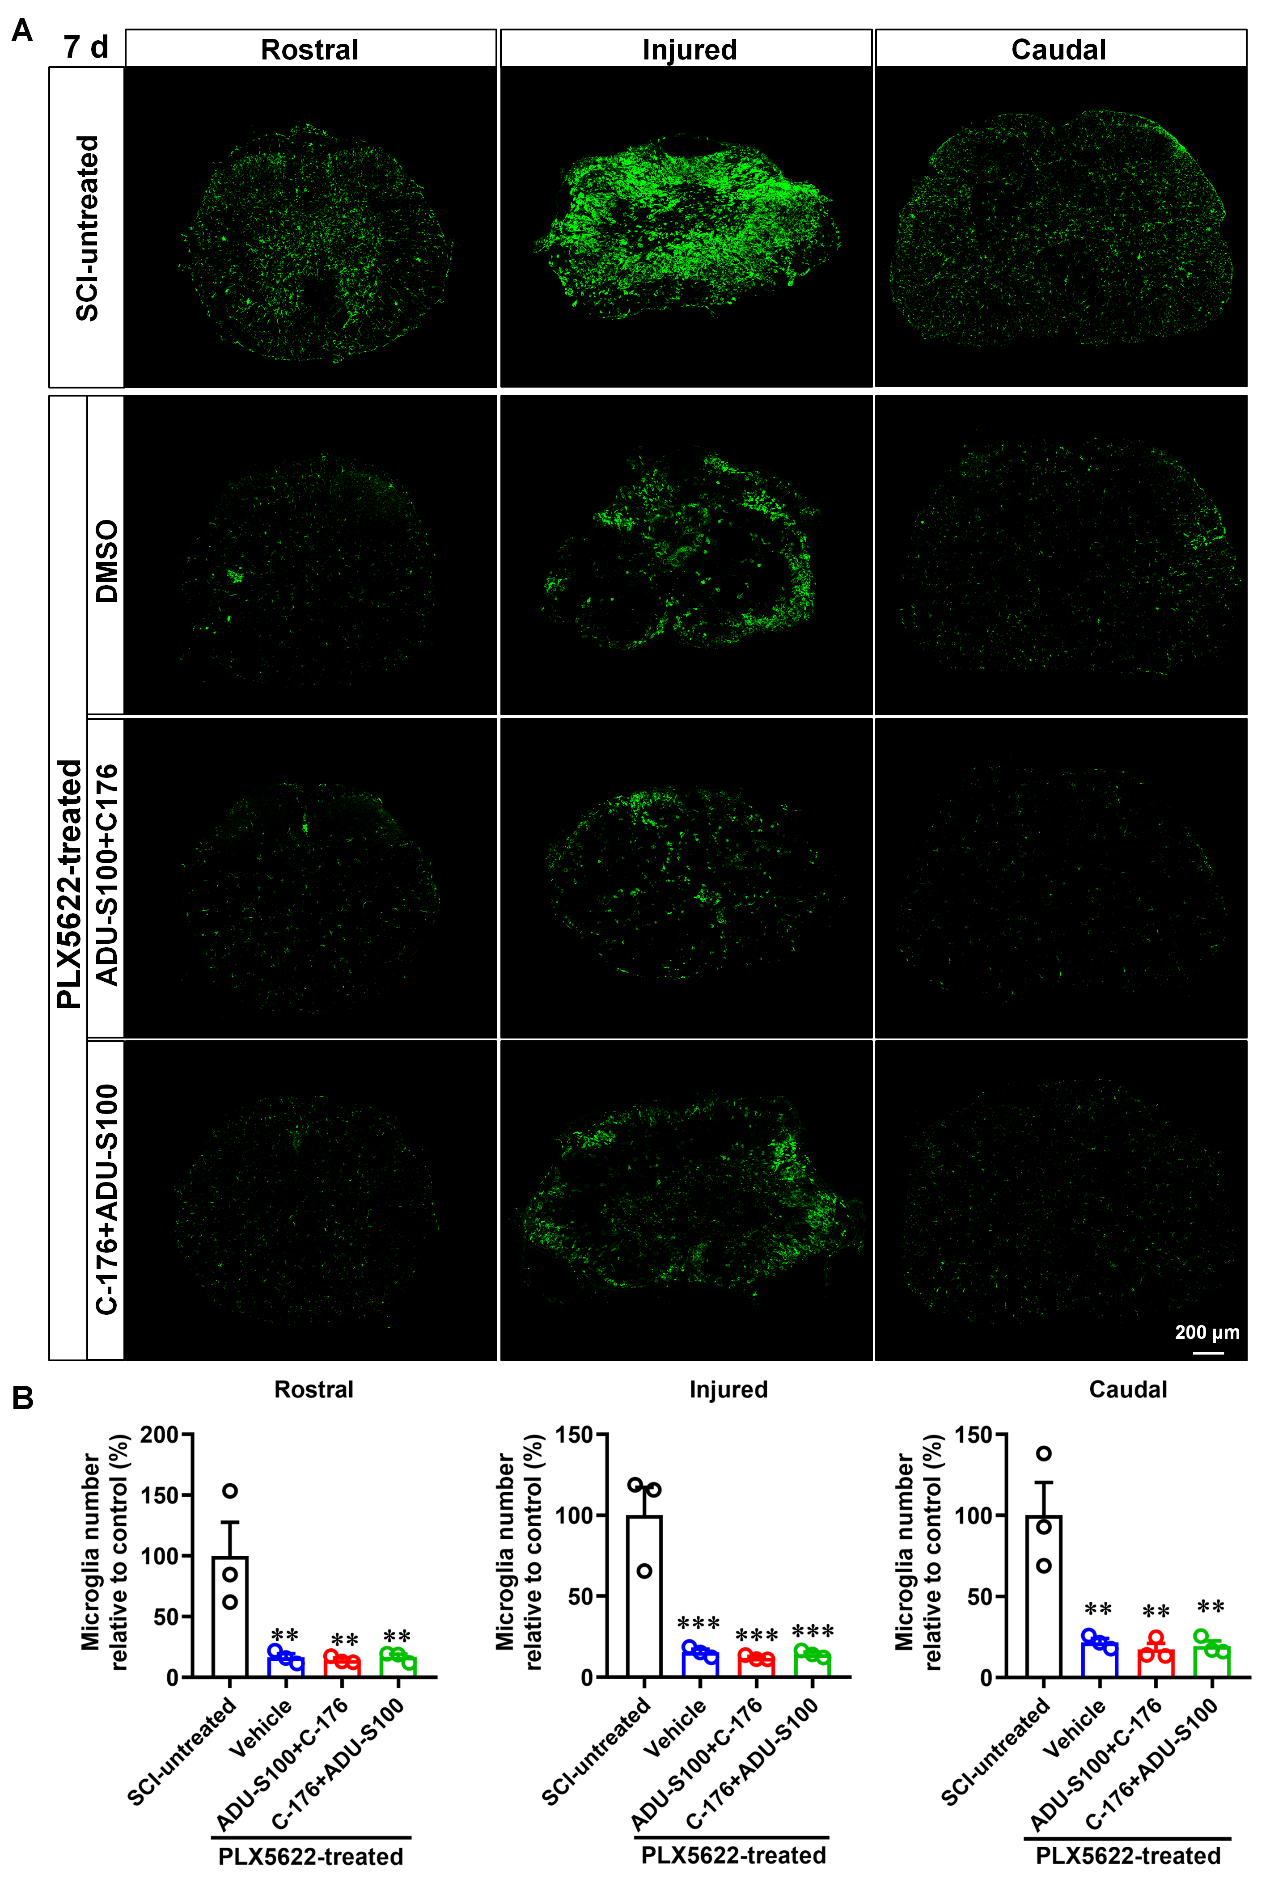


**Figure S11**. Microglial depletion efficiency in the spinal cord at 7 days post-SCI following early PLX5622 administration.

(A) Representative Iba1 immunofluorescence images from different spinal cord segments in SCI mice at 7 days post-injury (PLX5622, i.p., from 3 days pre- to 7 days post-SCI). Scale bar=200 μm.

(B) Quantification of Iba1 fluorescence intensity in the rostral, injured (lesion epicenter), and caudal segments of the spinal cord. Data are presented as mean ± SEM (n=3). Student’s t-test; *, **, *** indicate p < 0.05, p < 0.01, and p < 0.001, respectively, versus the untreated SCI-untreated group.


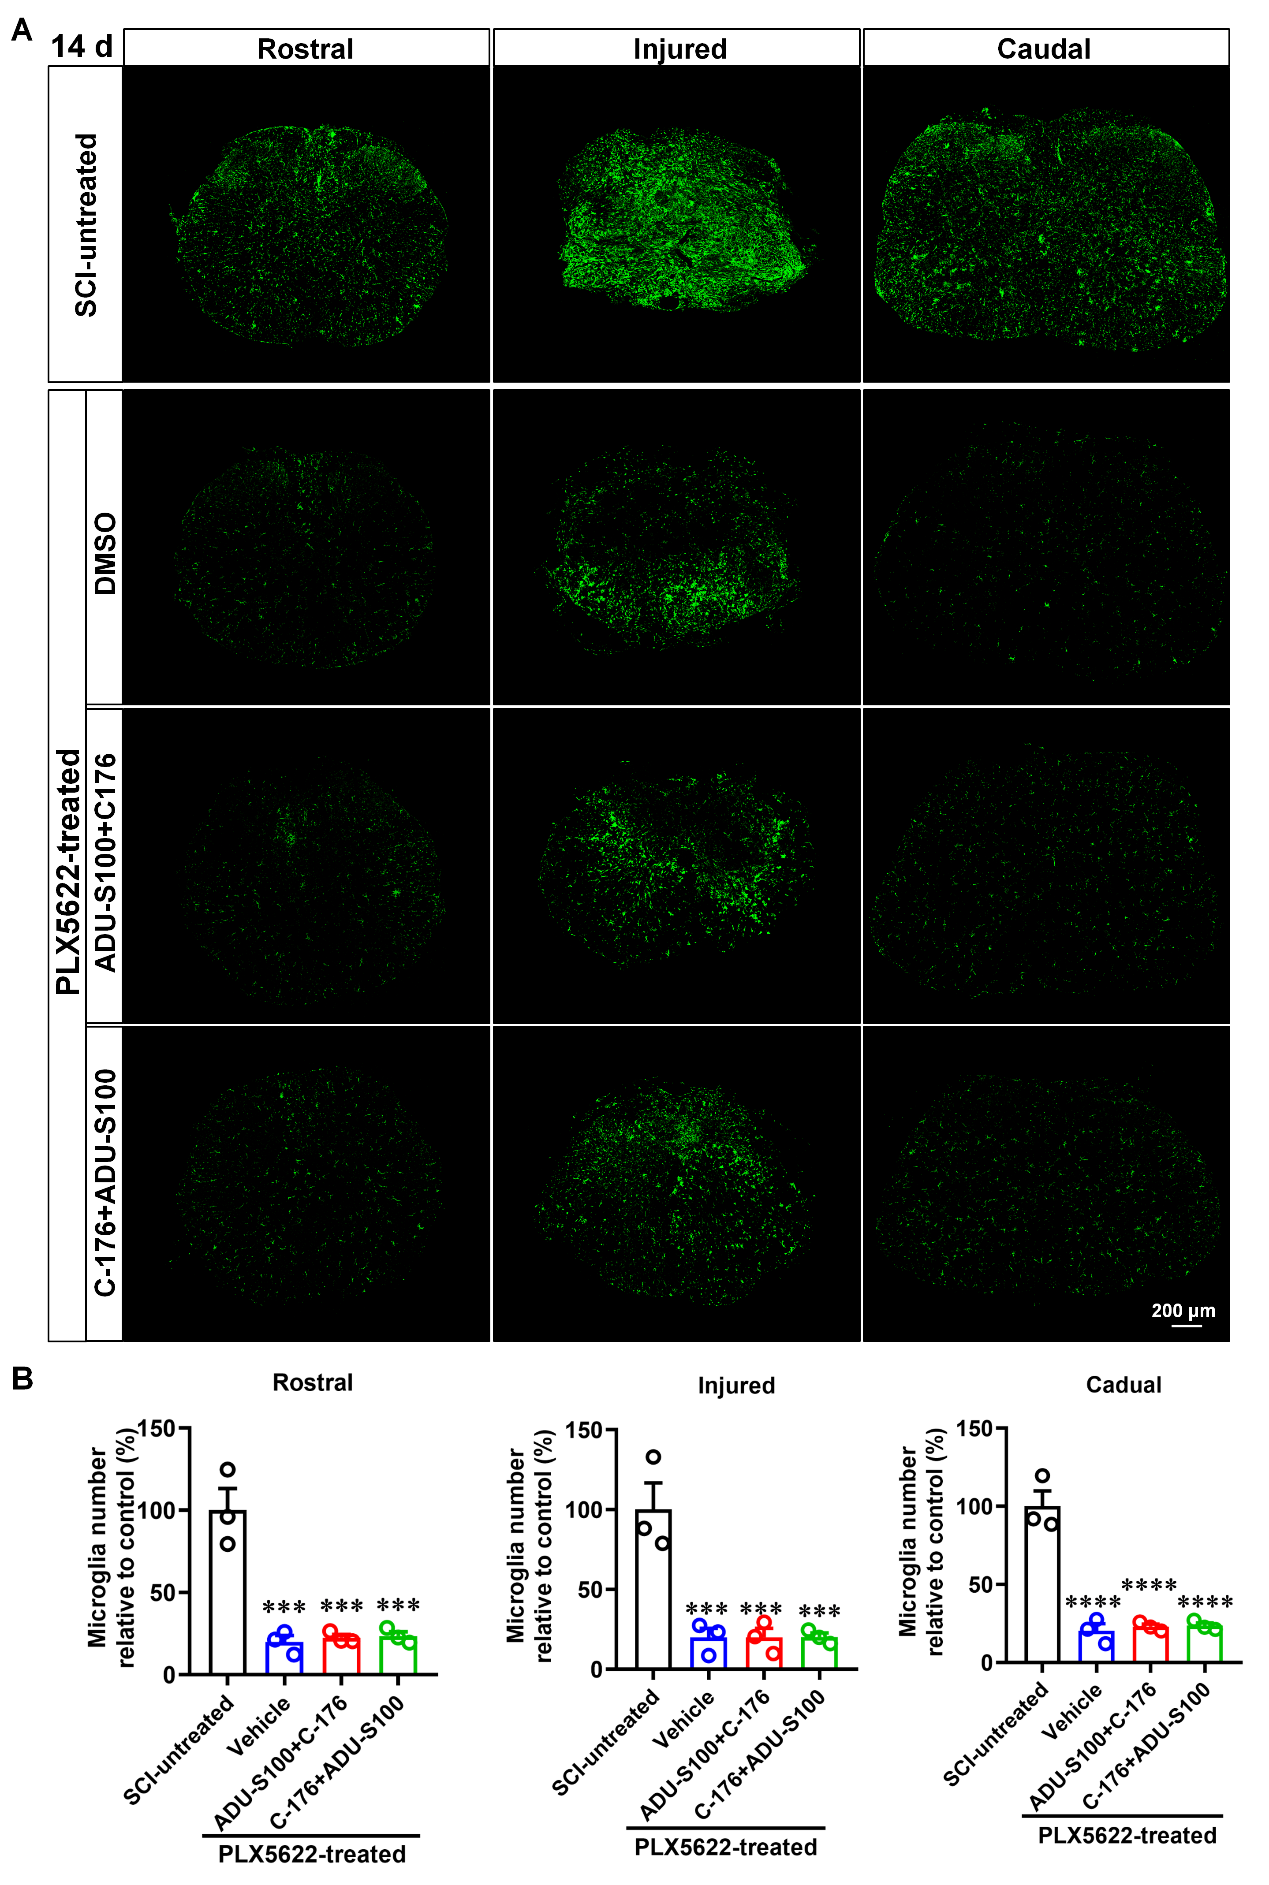


**Figure S10**. Microglial depletion efficiency in the spinal cord at 14 days post-SCI following late-phase PLX5622 administration.

(A) Representative Iba1 immunofluorescence images from different spinal cord segments in SCI mice at 14 days post-injury (PLX5622, i.p., days 9–14 post-SCI). Scale bar=200 μm.

(B) Quantification of Iba1 fluorescence intensity in the rostral, injured (lesion epicenter), and caudal segments of the spinal cord. Data are presented as mean ± SEM (n=3). Student’s t-test; *, **, *** indicate p < 0.05, p < 0.01, and p < 0.001, respectively, versus the untreated SCI group.


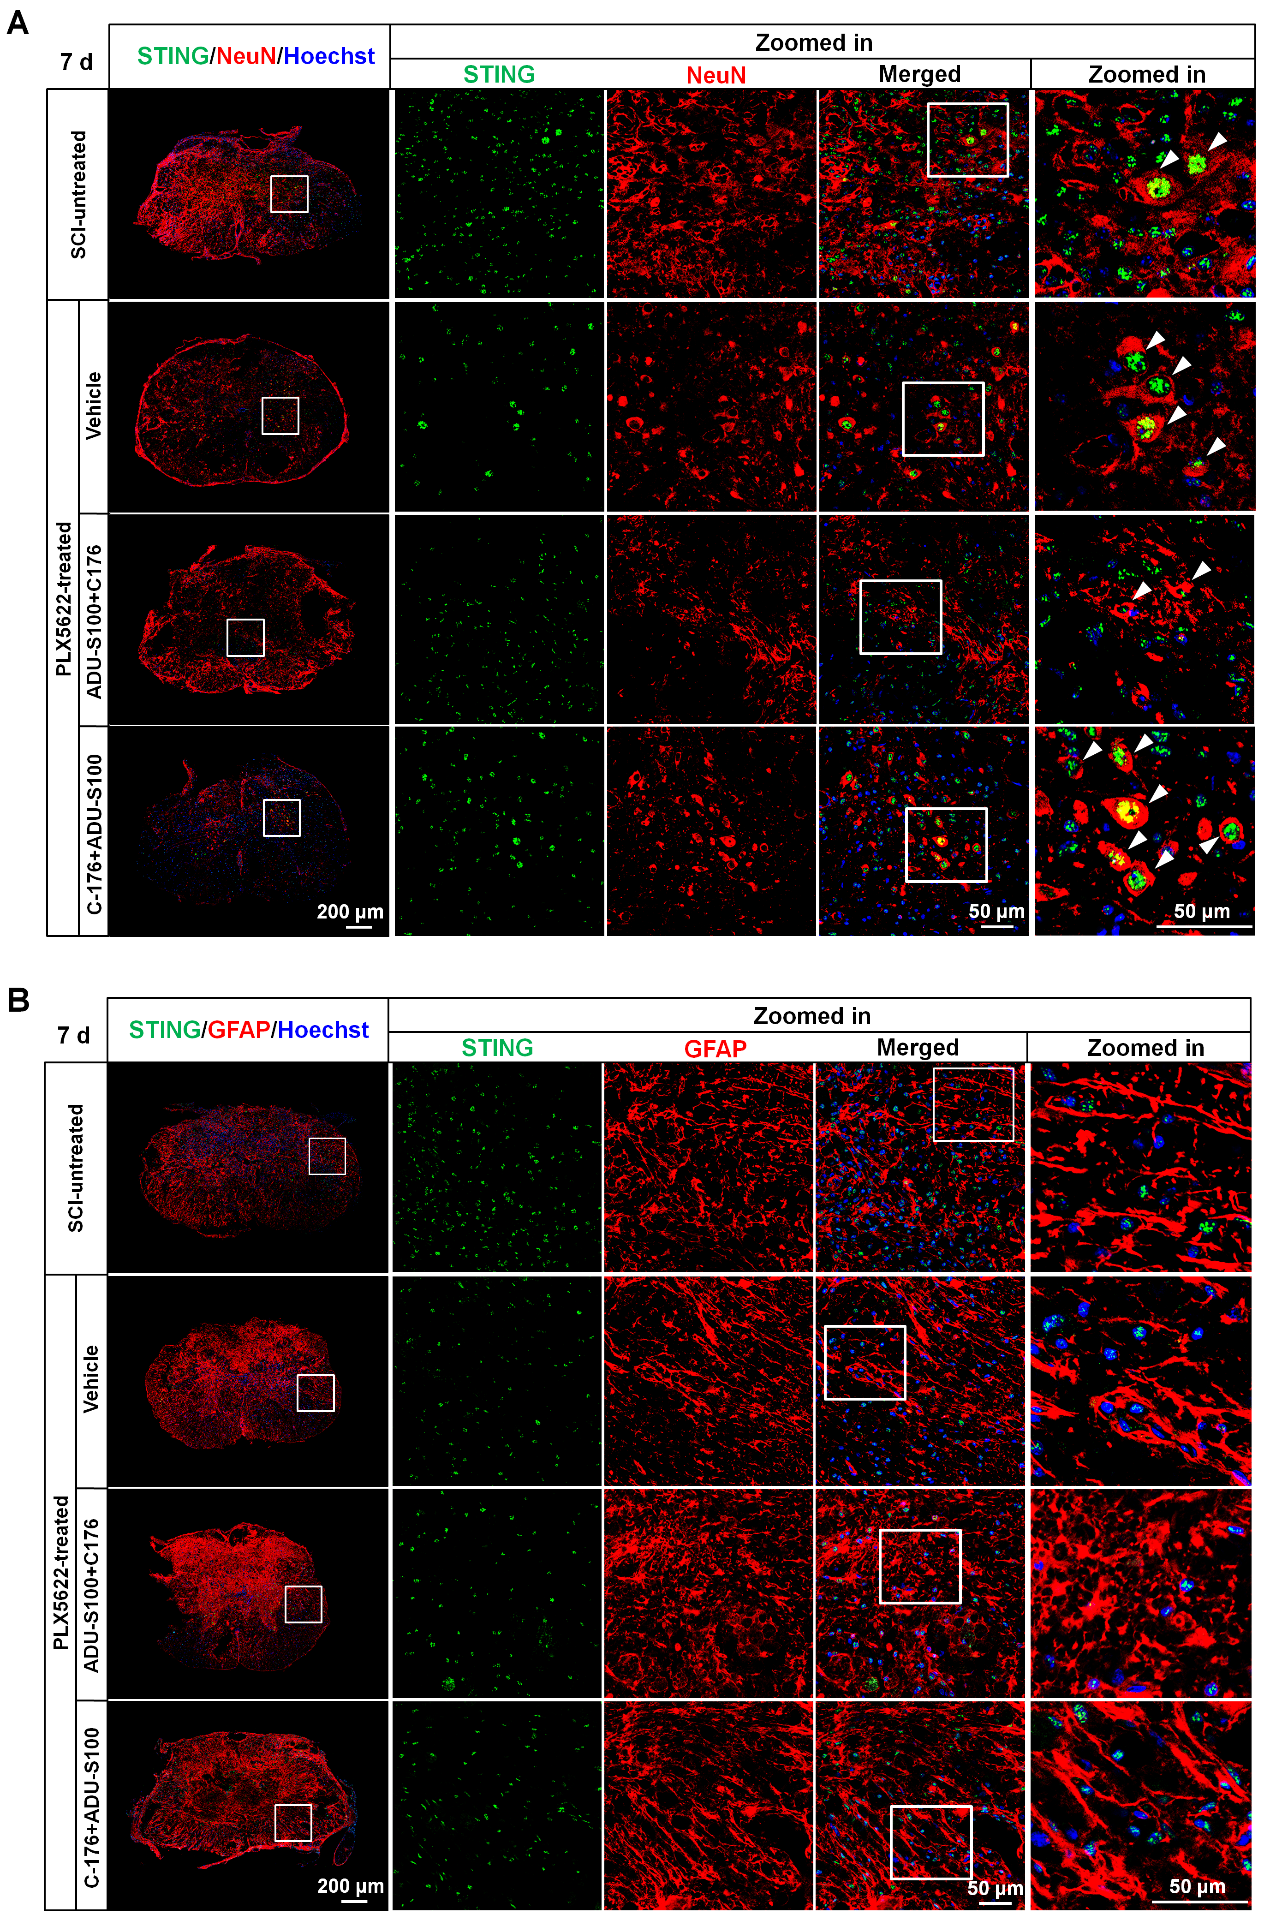


**Figure S11**. Expression and cellular localization of STING in the spinal cord after early microglial depletion.

(A) Double immunofluorescence for STING (green) and the neuronal marker NeuN (red), counterstained with Hoechst (blue). Left column: overview (scale bar=200 μm). Middle three columns: magnified views of the boxed regions in the left column (scale bar=50 μm). Right column (“Zoomed in”): further magnification of the boxed areas in the third column (scale bar=50 μm). White arrowheads indicate cells with co‑localization of STING and NeuN.

(B) Double immunofluorescence for STING (green) and the astrocytic marker GFAP (red), counterstained with Hoechst (blue). Image layout and annotations are as described in (A).
