# Supplementary material for: Sequential Modulation of the cGAS-STING Pathway Promotes Spinal Cord Injury Repair
Source: Research Square preprint supplement (doi:10.21203/rs.3.rs-8596952/v1), 2026-01-22
Supplement: Supplementary file 6 [file df6d4493a1c6e46c172ecbca.xlsx]

## Sheet: Primers
Supplementary Table 5. Primer sequences for RT-qPCR
Gene	Primer sequences		ID
	Forward primer	Reverse primer
GAP43	5'- GGCTCTGCTACTACCGATGC -3'	5'- GGCTTGTTTAGGCTCCTCCT -3'	NM_008083.2
Tubb3	5'- TGAGGCCTCCTCTCACAAGT -3'	5'- CGCACGACATCTAGGACTGA -3'	NM_023279.3
Map2	5'- TTCCCTCGTTTCTTCGGTCG -3'	5'- GCTGGTGGTATGTTCTGGCT -3'	NM_001431748.1
Sting1	5'- AAATAACTGCCGCCTCATTG -3'	5'-ACAGTACGGAGGGAGGAGGT -3'	NM_028261.1
TNF-α	5'- AGCCCCCAGTCTGTATCCTT -3'	5'- CTCCCTTTGCAGAACTCAGG -3'	NM_013693.3
IL-1β	5'- AGTTGCCTTCTTGGGACTGA -3'	5'- TCCACGATTTCCCAGAGAAC -3'	NM_008361.4
IL-1α	5'- TCGCAGCAGGGTTTTCTAGG -3'	5'- CAGCTTTAAGGACGGGAGGG -3'	NM_010554.4
IL-6	5'- CCCCAATTTCCAATGCTCTCC -3'	5'- CGCACTAGGTTTGCCGAGTA -3'	NM_031168.2
IL-10	5'- ACTTGGGTTGCCAAGCCTTA -3'	5'- GACACCTTGGTCTTGGAGCTTA -3'	NM_010548.2
Mt3	5'- CCCGCCTGGGGCTATAAAAG -3'	5'- GCAGGAACCACCAGTAGGAC -3'	NM_013603.2
Gzma	5'- TCTGTGCTGGCGCTTTGATT -3'	5'- CGGCATCTGGTTCCTGGTTT -3'	NM_010370.3
Gzmb	5'- GAAGCCAGGAGATGTGTGCT -3'	5'- GCACGTTTGGTCTTTGGGTC -3'	NM_013542.3
Gzmc	5'- CCTCCTTCCTCCCCTTCCAA -3'	5'- TGAGCAGCTGTTAGCACGAA -3'	NM_010371.4
Gzmd	5'- CTCTGTCCAAAGCTCAATGACA -3'	5'- GATCTGGGCAACTTGAGGGG -3'	NM_010372.2
Gzme	5'- TAATGCCACTGCCTTCTTCAG -3'	5'- GTTGTCACACACGAGGGGTC -3'	NM_010373.3
Gzmf	5'- AGATCTTCCTGCCTACGAGAG -3'	5'- TTGTTACACACGAGGGGTCC -3'	NM_010374.3
Cxcl10	5'- GCAGGATGATGGTCAAGCCA -3'	5'- AGAGCTAGGACAGCCATCCC -3'	NM_021274.2
Ccl2	5'- CAGGTCCCTGTCATGCTTCT -3'	5'- GTGGGGCGTTAACTGCATCT -3'	NM_011333.3
Ccl5	5'- TGCTCCAATCTTGCAGTCGT -3'	5'- GCAAGCAATGACAGGGAAGC -3'	NM_013653.3
Ccl7	5'- CCATCAGAAGTGGGTCGAGG -3'	5'- ACCATTCCTTAGGCGTGACC -3'	NM_013654.3
Ccl8	5'- GGCCAGATAAGGCTCCAGTC -3'	5'- GATGAGAAAACACGCAGCCC -3'	NM_021443.3
Cxcl1	5'- ACTCAAGAATGGTCGCGAGG -3'	5'- GTGCCATCAGAGCAGTCTGT -3'	NM_008176.3
S100a8	5'- CAATGCCGTCTGAACTGGAG -3'	5'- AAGCTCTGCTACTCCTTGTGG -3'	NM_013650.2
S100a9	5'- ACTCTTTAGCCTTGAAGAGCAAG -3'	5'- TGTCCTGGTTTGTGTCCAGG -3'	NM_001281852.1
Lyc1	5'- ACTGGTGCAACGACTACCAG -3'	5'- GCATCCCGTCATCCAGTAGG -3'	AY566284.1
Lyc2	5'- CAACGGGTCTTCGGGATGAA -3'	5'- AGTATGCCATGCAGAGCCAG -3'	AY572447.1
Nefl	5'- AGTTCGTTCGGCTACGATCC -3'	5'- TGGGCATCAAAGAGCCAGAG -3'	NM_010910.2
Nefh	5'- AGGAGGAGTGCGGCTACC -3'	5'- AGAGTCGGTCCAACCTCACT -3'	NM_010904.3
Nefm	5'- CGACTACAAACTGTCCCGCT -3'	5'- CGGATCTCCTGGTCGTAAGC -3'	NM_008691.2
Dcx	5'- TCAGGTAACGACCAAGACGC -3'	5'- AGGGCTTGTGGGTGTAGAGA -3'	AF045547.1
Mbp	5'- CTTCCTCCCAAGGCACAGAG -3'	5'- CTTGTACATGTGGCACAGCC -3'	NM_001025251.2
Gfap	5'- CCTGCCAGCTCTCCCT -3'	5'- AAAGGTGTGGCTGAAATGCG -3'	NM_001131020.1
Aif1	5'- GCCTGAGGAGATTTCAACAGAAG -3'	5'- TCCCTGCAAATCCCTGCTTT -3'	NM_001361501.2
Cgas	5'- TCCGCAGAAGGTTGTGAGAG -3'	5'- ATCTCGCTGCGCTGTATCAT -3'	NM_173386.5
Tbk1	5'- GCCACAAAAGCAATGAGCCA -3'	5'- AGCTCCTTAACCACGCCTTC -3'	NM_019786.4
Irf1	5'- CTTCGTCGAGGTAGGACGTG -3'	5'- TGCATCTCTAGCCAGGGTCT -3'	NM_008390.2
Irf2	5'- GCGATTATTCAACTGACGGGC -3'	5'- AGAGCGGAGCATCCTTTTCC -3'	NM_008391.4
Irf3	5'- ACAAGGCTCAGTCTTCCCATC -3'	5'- CCTTGCTCCACGTAGGGAC -3'	NM_016849.4
Irf4	5'- GGCTCCTGGAATCCCCATTGA -3'	5'- CAGAGTCACCTGGAATCTCGG -3'	NM_013674.2
Irf5	5'- TGAGGTATGCACTGCTCTGAAGT -3'	5'- CGTAATCATCAGTGGGTTGGC -3'	NM_001252382.1
Irf7	5'- TGCTTTCTAGTGATGCCGGG -3'	5'- AGGGTTCCTCGTAAACACGG -3'	NM_016850.3
Irf8	5'- CCTGACTTTGTGGGACATGC -3'	5'- CTTGGACACTCTCGGGTCTG -3'	NM_001301811.1
Irf9	5'- GGGTGGGGACTGTAGAAAGG -3'	5'- CGGAGCTGAAGAAATGGGCA -3'	NM_001159417.1
iNOS	5'- TGGTGAAGGGACTGAGCTGT -3'	5'- CTGAGAACAGCACAAGGGGT -3'	NM_010927.4
CD68	5'- GGGGCTCTTGGGAACTACAC -3'	5'- GTACCGTCACAACCTCCCTG -3'	NM_001291058.1
F4/80	5'- AGTGACTCACCTTGTGGTCC -3'	5'- AGCTTCCGAGAGTGTTGTGG -3'	NM_010130.5
GAPDH	5'- GCATCTTCTTGTGCAGTGCC -3'	5'- GATGGTGATGGGTTTCCCGT -3'	NM_001289726.2
